# Supplementary material for: Concerted action of kinesins KIF5B and KIF13B promotes efficient secretory vesicle transport to microtubule plus ends
Source: eLife. 2020 Nov 11;9:e61302. doi: 10.7554/eLife.61302 (PMC7710357; doi:10.7554/eLife.61302)
Supplement: Figure 1—figure supplement 1—source data 1. [file elife-61302-fig1-figsupp1-data1.xlsx]

## Sheet: Figure 1 - Figure supplement 1B
Figure 1 - Figure supplement 1B
(%)
		Rab6/PAUF Fixed	Rab6/PAUF Live
		67.04	45.6024
		74.27	41.875
		57.7778	72.09
		71.2121	45.2619
		55	69.3032
		55.8333	33.6543
		44.2105	45.0247
		58.3333	55.1202
		62.2642	31.3239
		45.9732	29.9277
			40.7794
			46.879

## Sheet: Figure 1 - Figure supplement 1C
Figure 1 - Figure supplement C
		Distance (mm)	Rab6 Intensity	Eg5 Intensity
		0	50	113
		0.071429	47	115
		0.142857	51	137
		0.214286	54	139
		0.285714	57	154
		0.357143	58	179
		0.428571	58	179
		0.5	63	166
		0.571429	62	154
		0.642857	47	135
		0.714286	54	121
		0.785714	58	116
		0.857143	50	110
		0.928571	49	129
		1	46	143
		1.07143	35	160
		1.14286	35	145
		1.21429	35	145
		1.28571	42	140
		1.35714	50	127
		1.42857	64	131
		1.5	79	126
		1.57143	107	121
		1.64286	139	120
		1.71429	160	128
		1.78571	210	122
		1.85714	255	105
		1.92857	255	105
		2	255	107
		2.07143	255	135
		2.14286	240	123
		2.21429	160	129
		2.28571	123	139
		2.35714	78	124
		2.42857	68	135
		2.5	50	140
		2.57143	50	164
		2.64286	49	213
		2.71429	49	255
		2.78571	51	255
		2.85714	43	244
		2.92857	45	158
		3	47	112
		3.07143	53	92
		3.14286	50	81
		3.21429	42	107
		3.28571	43	81
		3.35714	54	116
		3.42857	58	128
		3.5	58	128
		3.57143	45	131
		3.64286	46	115
		3.71429	42	105
		3.78571	42	122
		3.85714	47	77
		3.92857	54	71
		4	64	70
		4.07143	64	82
		4.14286	94	81
		4.21429	141	83
		4.28571	141	83
		4.35714	197	79
		4.42857	210	51
		4.5	221	56
		4.57143	160	71
		4.64286	151	113
		4.71429	127	114
		4.78571	119	90
		4.85714	147	48
		4.92857	246	71
		5	246	71
		5.07143	255	31
		5.14286	255	42
		5.21429	255	59
		5.28571	255	65
		5.35714	255	54
		5.42857	216	64
		5.5	164	69
		5.57143	90	68
		5.64286	74	64
		5.71429	62	61
		5.78571	62	61
		5.85714	55	91
		5.92857	41	129
		6	35	136
		6.07143	22	112
		6.14286	27	104
		6.21429	33	93
		6.28571	31	67
		6.35714	38	68
		6.42857	26	51
		6.5	33	41
		6.57143	25	58
		6.64286	30	44
		6.71429	29	44
		6.78571	19	63
