# Supplementary material for: Concerted action of kinesins KIF5B and KIF13B promotes efficient secretory vesicle transport to microtubule plus ends
Source: eLife. 2020 Nov 11;9:e61302. doi: 10.7554/eLife.61302 (PMC7710357; doi:10.7554/eLife.61302)
Supplement: Figure 1—source data 1. [file elife-61302-fig1-data1.xlsx]

## Sheet: Figure 1B
Figure 1B
		Distance (mm)	Rab6 Intensity	KIF13B Intensity
		0	79	13
		0.071429	75	17
		0.142857	70	31
		0.214286	69	34
		0.285714	84	61
		0.357143	130	99
		0.428571	178	89
		0.5	178	89
		0.571429	153	62
		0.642857	153	26
		0.714286	153	26
		0.785714	181	28
		0.857143	132	25
		0.928571	85	16
		1	85	16
		1.07143	50	15
		1.14286	38	18
		1.21429	38	18
		1.28571	46	19
		1.35714	46	12
		1.42857	21	17
		1.5	46	12
		1.57143	48	23
		1.64286	46	26
		1.71429	46	26
		1.78571	40	17
		1.85714	38	23
		1.92857	40	23
		2	41	20
		2.07143	52	19
		2.14286	33	14
		2.21429	50	21
		2.28571	42	26
		2.35714	39	27
		2.42857	66	64
		2.5	100	84
		2.57143	140	128
		2.64286	129	137
		2.71429	105	111
		2.78571	69	57
		2.85714	67	38
		2.92857	45	25
		3	20	18
		3.07143	48	19
		3.14286	54	20
		3.21429	78	13
		3.28571	58	12
		3.35714	64	14
		3.42857	56	14
		3.5	39	21
		3.57143	46	19
		3.64286	38	25
		3.71429	34	32
		3.78571	34	32
		3.85714	38	18
		3.92857	30	20
		4	30	20
		4.07143	37	24
		4.14286	36	14
		4.21429	42	22
		4.28571	42	22
		4.35714	33	19
		4.42857	28	15
		4.5	28	15
		4.57143	46	24
		4.64286	43	29
		4.71429	52	36
		4.78571	73	56
		4.85714	114	105
		4.92857	124	137
		5	124	137
		5.07143	114	121
		5.14286	90	73
		5.21429	61	33
		5.28571	55	31
		5.35714	45	26

## Sheet: Figure 1C
Figure 1C
(%)		KIF13B FL	KIF13B-Δmotor	KIF13A
		53.5179	44.5134	6.60215
		34.192	62.4813	16.667
		58.9756	77.618	9.42259
		21.0123	46.6482	11.6552
		23.108	49.159	4.78248
		45.6578	42.9451
		47.7876	52.7776
		57.1118	52.3422
		44.3211	60.6652
		38.6674	61.5497
		57.1436	65.5467
		40.522	53.3422
		47.3268	78.4595
		61.4705	81.9999

## Sheet: Figure 1G
Figure 1G
(Intensity)
			Example Left				Example right
			Time (s)	mCherry-Rab6	GFP-KIF13B		Time (s)	mCherry-Rab6	GFP-KIF13B
			0	826.277	387.009		0	107.214	-273.589
			0.1	657.964	251.723		0.1	53.1696	-90.1161
			0.2	951.598	443.812		0.2	107.589	-43.4107
			0.3	933.196	258.964		0.3	142.92	71.4464
			0.4	1045.4	429.875		0.4	155.116	61.1875
			0.5	998.232	372.714		0.5	174.527	6.9821
			0.6	1077.4	302.848		0.6	25.1964	92.625
			0.7	1135.05	262.973		0.7	188.464	16.8125
			0.8	1207.47	245.33		0.8	199.5	96.7679
			0.9	1258.71	337.089		0.9	-14.9375	41.7232
			1	1150.9	275.098		1	0.7946	169.866
			1.1	1137.22	283.473		1.1	85.8482	-37.7589
			1.2	1146.13	251.143		1.2	107.491	58.8661
			1.3	1154.92	232.321		1.3	189.705	-35.2054
			1.4	1343.6	313.866		1.4	163.071	56.2589
			1.5	1357.99	212.277		1.5	172.179	47.9643
			1.6	1069.88	240.366		1.6	321.732	121.107
			1.7	1084.95	296.429		1.7	202	84.8214
			1.8	1212.43	312.473		1.8	79.4464	154.062
			1.9	1260.79	272.384		1.9	303.911	235.089
			2	1344.93	305.089		2	575.616	304.366
			2.1	1111.29	332.768		2.1	870.518	488.598
			2.2	1013.16	286.982		2.2	730.482	581.009
			2.3	1141.38	329.5		2.3	520.554	438.304
			2.4	1196.61	238.83		2.4	635.107	436.83
			2.5	1161.49	213.777		2.5	694.357	359.973
			2.6	1302.88	241.491		2.6	642.205	437.018
			2.7	1280.94	279.705		2.7	596.384	525.357
			2.8	1187.7	301.982		2.8	554.83	405.536
			2.9	1192.37	450.741		2.9	574.321	454.929
			3	1214.3	365.741		3	592.134	327.089
			3.1	1162.96	197.045		3.1	657.58	412.107
			3.2	1239.11	250.946		3.2	604.062	597.696
			3.3	1489.74	217.438		3.3	687.438	426.768
			3.4	1234.92	405.545		3.4	702.286	677.661
			3.5	1371.44	263.75		3.5	685.393	474.312
			3.6	1293.08	351.634		3.6	832.027	428.804
			3.7	1101.3	236.562		3.7	784.911	431.562
			3.8	1258.79	263.812		3.8	837.223	385.062
			3.9	1394.47	281.884		3.9	725.902	525.089
			4	1333.46	218.607		4	663.214	285.259
			4.1	1277.44	258.312		4.1	821.25	352.955
			4.2	1255.98	255.08		4.2	723.696	345.991
			4.3	1169.38	291.446		4.3	702.188	323.42
			4.4	1023.96	240.83		4.4	853.946	695.991
			4.5	904.58	165.714		4.5	966.562	638.67
			4.6	1069.09	139.223		4.6	848.062	588.705
			4.7	1128.72	289.571		4.7	926.518	631.464
			4.8	1326.39	291.625		4.8	923.107	396.268
			4.9	1153.71	312.759		4.9	828.625	462.036
			5	1382.4	348.562		5	808.955	469.232
			5.1	1114.93	256.893		5.1	902.714	479.5
			5.2	1146.04	245.938		5.2	826.964	582.464
			5.3	1271.7	300.196		5.3	817.589	822.116
			5.4	1062.21	263.152		5.4	930.723	509.741
			5.5	1369.77	190.089		5.5	707.938	692.714
			5.6	1188.2	379.893		5.6	855.688	565.777
			5.7	1322.42	226.777		5.7	746.036	592.027
			5.8	1185.68	456.83		5.8	756.107	510.732
			5.9	1084.68	353.393		5.9	736.348	568.295
			6	1182.26	383.321		6	667.759	756.098
			6.1	1225.48	212.455		6.1	813.08	507.348
			6.2	1302.84	422.062		6.2	688.509	916.92
			6.3	1133.49	410.616		6.3	754.795	573.491
			6.4	1313.12	439.179		6.4	843.714	540.777
			6.5	1068.87	496.83		6.5	851.5	520.688
			6.6	1118.68	444.384		6.6	881.268	695.312
			6.7	1203.98	414.339		6.7	694.616	603.455
			6.8	1011.93	351.188		6.8	852.83	610.518
			6.9	1196.03	329.482		6.9	866.982	654.554
			7	1190.09	340.705		7	892.938	550.054
			7.1	1021.17	165.554		7.1	889.205	779.795
			7.2	1126.77	212.804		7.2	895.982	676.161
			7.3	1084.55	226.679		7.3	850.223	868.152
			7.4	1140.12	243.527		7.4	1069.09	934.411
			7.5	1060.22	277.223		7.5	1227.13	1032.85
			7.6	976.518	266.42		7.6	1414.81	1008.14
			7.7	947.634	138.33		7.7	1304.8	1038.39
			7.8	1071.59	208.83		7.8	1226.45	981.839
			7.9	1096.28	144.866		7.9	1318.97	963.777
			8	959.911	115.402		8	1147.94	764.473
			8.1	934.768	172.179		8.1	1199.03	878.205
			8.2	1024.93	128.089		8.2	1366.67	668.67
			8.3	987.196	283.304		8.3	1109.14	698.312
			8.4	858.009	210.625		8.4	1171.29	701.25
			8.5	984.857	338.92		8.5	1021.12	653.652
			8.6	897.902	151.295		8.6	1134.9	758.107
			8.7	1023.4	164.804		8.7	1098.79	557.723
			8.8	1065.12	185.893		8.8	1120.19	750.429
			8.9	1045.26	102.777		8.9	1010.71	434.911
			9	1046.62	159.384		9	905.536	629.429
			9.1	980.179	280.723		9.1	863.58	667.839
			9.2	948.125	278.152		9.2	836.509	575.143
			9.3	910.571	180.259		9.3	659.554	394.152
			9.4	768.438	263.411		9.4	763.179	337.83
			9.5	939.589	164.768		9.5	586.634	250.875
			9.6	881.411	107.223		9.6	716.393	336.696
			9.7	1400.83	267.339		9.7	684.509	300.732
			9.8	1448.79	276.589		9.8	640.188	339.348
			9.9	1025.68	118.518		9.9	610.366	518.777
			10	738.312	62.8036		10	705.357	557.839
			10.1	727.741	200.902		10.1	619.58	394.723
			10.2	507.75	221.884		10.2	777.143	418.991
			10.3	446.384	290.696		10.3	723.473	439.232
			10.4	363.839	217.5		10.4	647.723	387
			10.5	424.491	145.134		10.5	710.259	402.089
			10.6	321.759	274.554		10.6	660.804	497.321
			10.7	307.5	337.58		10.7	636.741	566.277
			10.8	370.67	164.723		10.8	608.607	459.268
			10.9	180.018	143.018		10.9	827.679	396.893
			11	120.161	115.732		11	626.509	329.732
			11.1	295.473	122.223		11.1	671.723	367.688
			11.2	-20.9018	176.277		11.2	647.321	468.589
			11.3	73.6786	141.438		11.3	668.804	438.375
			11.4	188.589	46.0089		11.4	566.134	380.384
			11.5	295.455	67.8036		11.5	663.384	416.5
			11.6	117.062	89.0982		11.6	754.652	394.527
			11.7	184.241	130		11.7	687.509	458.571
			11.8	197.812	47.125		11.8	666.295	332.205
			11.9	109.607	64.0714		11.9	630.777	243.589
			12	200.348	54.9821		12	706.902	197.786
			12.1	129.491	112.536		12.1	790.268	452.973
			12.2	63.0357	-5.0268		12.2	762.696	402.589
			12.3	94.6964	-47.7143		12.3	726.911	302.884
			12.4	189.357	15.1786		12.4	775.821	372.991
			12.5	170.661	39.1071		12.5	749.527	439.75
			12.6	-68.3036	-34.8214		12.6	525.438	363.17
			12.7	59.5982	4.3839		12.7	681.223	271.848
			12.8	-43.7411	73.2768		12.8	620.875	327.036
			12.9	94.1161	26.0714		12.9	664.438	339.402
			13	44.1339	-24.4375		13	621.348	327.045
			13.1	98.8125	-88.6875		13.1	579.304	342.929
			13.2	220.161	167.625		13.2	557.036	368.071
			13.3	44.9911	79.7232		13.3	599.286	483.42
			13.4	103.125	-40.3214		13.4	583.661	471.768
			13.5	-28.875	-39.7054		13.5	616.107	500.696
			13.6	-5.4554	81.25		13.6	607.688	322.589
			13.7	-1	81.0446		13.7	653.17	312.848
			13.8	-80.5	-28.5179		13.8	689.009	525.848
			13.9	36.9821	-20.4286		13.9	570.089	565.571
			14	21.4821	-32.0714		14	784.464	532.973
			14.1	51.5	-59.9821		14.1	606.241	449.473
			14.2	61.9821	11.625		14.2	678.161	458.473
			14.3	-16.5446	55.9911		14.3	671.384	446.562
			14.4	41.7946	-83.1696		14.4	537.571	443.777
			14.5	1.9107	22.8036		14.5	663.5	320.946
			14.6	18.8214	31.2143		14.6	556.589	451.295
			14.7	164.929	-67.2232		14.7	478.938	336.848
			14.8	106.554	-0.125		14.8	350.848	369.482
			14.9	64.1875	-10.6696		14.9	446.277	263.143
			15	250.339	12.4018		15	443.259	389.777
			15.1	180.75	-84.2768		15.1	499.268	394.295
			15.2	85.7143	-5.7054		15.2	652.491	378.009
			15.3	24.1429	64.7679		15.3	535.17	293.464
			15.4	-26.5179	-60.1518		15.4	536.688	234.83
			15.5	-7.9018	49.5		15.5	622.179	359.25
			15.6	2.5446	77.5357		15.6	500.491	469.08
			15.7	57.5536	-32.3482		15.7	602.589	470.938
			15.8	160.062	-32.4018		15.8	539.464	473.295
			15.9	112.705	-7.0179		15.9	540.821	461.902
			16	0.8661	126.893		16	559.991	614.482
			16.1	-2.2946	-28.9464		16.1	478.062	411.161
			16.2	146.982	-8.7143		16.2	557.518	414.116
			16.3	112.964	-0.5089		16.3	478.634	391.991
			16.4	115.83	25.3036		16.4	444.393	481.304
			16.5	123.009	-23.0714		16.5	565.884	336.125
			16.6	85.8571	44.2143		16.6	564.804	396.643
			16.7	154.866	72.9821		16.7	636.929	558.009
			16.8	160.42	66.8571		16.8	814.902	581.759
			16.9	110.839	6.3571		16.9	770.938	638.759
			17	162.768	66.2857		17	719.411	649.25
			17.1	-27.8036	30.3929		17.1	799.312	572.312
			17.2	12.5804	-48.6429		17.2	701.33	358.036
			17.3	131.366	-26.3839		17.3	690.893	471.964
			17.4	134.348	-9.0268		17.4	444.938	627.58
			17.5	105.009	51.8036		17.5	417.929	509.884
			17.6	150.821	-69.2679		17.6	282.571	366.75
			17.7	221.58	-89.9107		17.7	287.839	186.134
			17.8	190.732	64.4821		17.8	212.759	93.0089
			17.9	146.205	16.0446		17.9	178.857	304.598
			18	119.509	36.8839		18	217.036	293.223
			18.1	77.5089	-26.6339		18.1	208.321	329.411
			18.2	133.634	-131.545		18.2	223.777	224.982
			18.3	6.1786	-28.4911		18.3	123.375	101.527
			18.4	47.4643	65.2321		18.4	212.812	210.036
			18.5	9	-37.1607		18.5	126.938	204.661
			18.6	0.1607	-92.9821		18.6	67.8304	362.839
			18.7	78.5089	66.7232		18.7	135.259	276.643
			18.8	-90.3036	-24.4732		18.8	185.679	180.857
			18.9	83.0804	-21.2411		18.9	304.848	261.696
			19	22.7589	34.5446		19	362.357	199.545
			19.1	169.25	-59.7857		19.1	102.58	224.214
			19.2	80.1429	-22.3482		19.2	178.804	140.018
			19.3	-43.3571	0.0893		19.3	178.545	148.08
			19.4	52.0982	11		19.4	118.071	177.205
			19.5	-10.9911	-43.8304		19.5	130.768	197.152
			19.6	-96.4464	-35.5089		19.6	47.3839	76.6964
			19.7	-30.4286	-65.7589		19.7	195.786	142.92
			19.8	-7.4732	-0.25		19.8	102.027	97.3304
			19.9	76.5625	41.3482		19.9	279.866	59.1429
			20	22.3304	67.6607		20	224.125	103.839
			20.1	8.3571	137.688		20.1	90	240.5
			20.2	82.8839	-2.9554		20.2	89.8571	62.8393
			20.3	18.8393	54.0268		20.3	143.179	224.768
			20.4	12.6429	-68.6964		20.4	193.92	67.5536
			20.5	-137.241	-13.3125		20.5	163.875	146.366
			20.6	59.4196	-11.4286		20.6	46.4375	321.241
			20.7	-53	10.4107		20.7	94.5	130.714
			20.8	32.3036	-128.473		20.8	150.446	98.2232
			20.9	75.9643	-9.75		20.9	161.759	153.812
			21	108.643	20.2232		21	97.5625	59.3214
			21.1	51.7321	-55.9554		21.1	258.134	85.0625
			21.2	-17.2946	14.8036		21.2	135.75	135.973
			21.3	-101.857	20.8482		21.3	233.759	81.4821
			21.4	-61.8214	-37.0446		21.4	269.545	186.018
			21.5	54.5982	-19.0446		21.5	152.42	120.607
			21.6	-2.7589	10.6696		21.6	205.643	108.205
			21.7	101.625	37.9196		21.7	35.4375	134.964
			21.8	-78.4018	79.4107		21.8	59.9643	140.795
			21.9	-97.7411	32.7054		21.9	-33.2857	163.759
			22	16.375	38.9018		22	37.8304	96.8839
			22.1	-34.9286	60.8482		22.1	123.643	44.2768
			22.2	-38.1875	44.9554		22.2	127.688	-23.8839
			22.3	-93.7321	-12.2054		22.3	189.58	98.7679
			22.4	-136.92	-49.9911		22.4	193.232	165.545
			22.5	-104.464	-36.7411		22.5	127.893	118.696
			22.6	110.223	-78.7232		22.6	145.723	-25.6607
			22.7	68.0446	47.8393		22.7	176.08	110.179
			22.8	157.768	-75.3036		22.8	87.3482	101.339
			22.9	-49.7411	12.2857		22.9	32.8571	-38.0625
			23	-22.8571	-84.5446		23	147.527	-56.5804
			23.1	138.688	-82.2232		23.1	49.3304	104.982
			23.2	109.384	24.8393		23.2	-80.2143	126.161
			23.3	48.4911	3.3839		23.3	-48.3839	80.1161
			23.4	127.089	-56.0982		23.4	-89.6339	22.9375
			23.5	-32.1964	103.268		23.5	9.2054	86.2054
			23.6	20.3571	8.1339		23.6	23.3929	96.6786
			23.7	207.268	60.3393		23.7	77.3125	162.732
			23.8	93.5804	60.9107		23.8	9.7857	115.17
			23.9	0.4732	132.054		23.9	15.4286	72.6339
			24	35.4643	-7.5357		24	110.018	320.598
			24.1	120.134	55.7857		24.1	10.6875	108.446
			24.2	69.9375	117.25		24.2	68.4286	9.2679
			24.3	183.491	132.089		24.3	-10.4375	35.9286
			24.4	12.9821	19.8661		24.4	1.1429	-5.1161
			24.5	47.2143	144.152		24.5	224.321	-24.3214
			24.6	150.991	73.3929		24.6	67.6339	-86.3036
			24.7	5.6786	104.161		24.7	31.5446	-171.491
			24.8	-25.7054	136.205		24.8	70.0625	-108.902
			24.9	84.3125	223.536		24.9	107.214	-273.589
			25	59.3571	119.893		25	53.1696	-90.1161
			25.1	168.83	154.696		25.1	107.589	-43.4107
			25.2	86.4821	178.089		25.2	142.92	71.4464
			25.3	35.2946	147.027		25.3	155.116	61.1875
			25.4	90.3661	153.438		25.4	174.527	6.9821
			25.5	42.3304	4.3393		25.5	25.1964	92.625
			25.6	-53.7946	72.4732		25.6	188.464	16.8125
			25.7	93.0982	156.964		25.7	199.5	96.7679
			25.8	162.714	41.6875		25.8	-14.9375	41.7232
			25.9	18.2768	-23.7232		25.9	0.7946	169.866
			26	-22.2321	-100.964		26	85.8482	-37.7589
			26.1	28.2946	34.1429		26.1	107.491	58.8661
			26.2	-10.5089	7.6786		26.2	189.705	-35.2054
			26.3	80.4554	25.4911		26.3	163.071	56.2589
			26.4	-22.125	36.8304		26.4	172.179	47.9643
			26.5	114.089	49.8571		26.5	321.732	121.107
			26.6	138.955	17.0536		26.6	202	84.8214
			26.7	135.17	58.3839		26.7	79.4464	154.062
			26.8	114.812	10.7321		26.8	303.911	235.089
			26.9	-41.5179	18.1696		26.9	575.616	304.366
			27	-26.1071	-8.6429		27	870.518	488.598
			27.1	-12.1786	-69.3482		27.1	730.482	581.009
			27.2	25.9196	60.3929		27.2	520.554	438.304
			27.3	16.7589	22.1518		27.3	635.107	436.83
			27.4	118.196	10.2946		27.4	694.357	359.973
			27.5	37.6875	68.2321		27.5	642.205	437.018
			27.6	102.643	7.3393		27.6	596.384	525.357
			27.7	70.9821	4.3214		27.7	554.83	405.536
			27.8	169.67	43.5089		27.8	574.321	454.929
			27.9	-73.6429	12.3304		27.9	592.134	327.089
			28	-62.4464	25.0179		28	657.58	412.107
			28.1	-44.9732	71.3482		28.1	604.062	597.696
			28.2	2.1607	14.8036		28.2	687.438	426.768
			28.3	50.7768	5.5179		28.3	702.286	677.661
			28.4	14.9375	4.2321		28.4	685.393	474.312
			28.5	-170.562	4.7589		28.5	832.027	428.804
			28.6	-78.4554	33.1071		28.6	784.911	431.562
			28.7	-99.7232	83.4018		28.7	837.223	385.062
			28.8	-158.143	61.6339		28.8	725.902	525.089
			28.9	-23.4018	-22.3661		28.9	663.214	285.259
			29	-44.7321	73.6964		29	821.25	352.955
			29.1	-32.7411	-17.6964		29.1	723.696	345.991
			29.2	67.5893	81.8214		29.2	702.188	323.42
			29.3	-23.3929	90.5268		29.3	853.946	695.991
			29.4	-15.1964	9.7679		29.4	966.562	638.67
			29.5	-135.571	4.6429		29.5	848.062	588.705
			29.6	-35.3304	6.4107		29.6	926.518	631.464
			29.7	-61.8839	-15.5268		29.7	923.107	396.268
			29.8	-20.1875	12.2054		29.8	828.625	462.036
			29.9	-66.8214	5.8661		29.9	808.955	469.232
			30	-32.9643	67.3661		30	902.714	479.5
			30.1	-43.9375	-38.5804		30.1	826.964	582.464
			30.2	-53.25	-36.4464		30.2	817.589	822.116
			30.3	-60.5	-15.5357		30.3	930.723	509.741
			30.4	-42.125	76.7321		30.4	707.938	692.714
			30.5	-62.7411	90.8125		30.5	855.688	565.777
			30.6	-106.143	59.5446		30.6	746.036	592.027
			30.7	-132.938	30.9732		30.7	756.107	510.732
			30.8	-40	133.214		30.8	736.348	568.295
			30.9	-3.4107	106.304		30.9	667.759	756.098
			31	138.071	40.7054		31	813.08	507.348
			31.1	-30.625	-53.5536		31.1	688.509	916.92
			31.2	3.7589	59.2857		31.2	754.795	573.491
			31.3	13.8571	57.1964		31.3	843.714	540.777
			31.4	-23.0804	30.8304		31.4	851.5	520.688
			31.5	-48.6964	20.0893		31.5	881.268	695.312
			31.6	93.7411	64.4375		31.6	694.616	603.455
			31.7	15.5893	-72.3036		31.7	852.83	610.518
			31.8	46.3393	-96.8929		31.8	866.982	654.554
			31.9	-13.5625	70.9196		31.9	892.938	550.054
			32	8.7679	10.4375		32	889.205	779.795
			32.1	-17.8929	7.5446		32.1	895.982	676.161
			32.2	102.741	-32.4107		32.2	850.223	868.152
			32.3	103.384	-97.3839		32.3	1069.09	934.411
			32.4	0.3571	-5.8839		32.4	1227.13	1032.85
			32.5	-68.0179	109.393		32.5	1414.81	1008.14
			32.6	89.9554	-29.2679		32.6	1304.8	1038.39
			32.7	106.455	50.9464		32.7	1226.45	981.839
			32.8	84.4107	13.1071		32.8	1318.97	963.777
			32.9	27.6429	3.3036		32.9	1147.94	764.473
			33	-5.4286	127.616		33	1199.03	878.205
			33.1	-61.375	-22.4821		33.1	1366.67	668.67
			33.2	18.8393	2.6071		33.2	1109.14	698.312
			33.3	86.9196	-90.1786		33.3	1171.29	701.25
			33.4	24.5089	27.6696		33.4	1021.12	653.652
			33.5	-138.812	-4.0893		33.5	1134.9	758.107
			33.6	-53.9464	21.3304		33.6	1098.79	557.723
			33.7	-34.1518	-47.3839		33.7	1120.19	750.429
			33.8	34.0446	-40.75		33.8	1010.71	434.911
			33.9	70.6607	-79.875		33.9	905.536	629.429
			34	151.902	12.8125		34	863.58	667.839
			34.1	8.6607	73.5357		34.1	836.509	575.143
			34.2	59.7411	30.7589		34.2	659.554	394.152
			34.3	-24.0804	37.4554		34.3	763.179	337.83
			34.4	-85	-43.7232		34.4	586.634	250.875
			34.5	-38.4286	-13.4732		34.5	716.393	336.696
			34.6	33.9643	-40.875		34.6	684.509	300.732
			34.7	-82.0893	-31.5357		34.7	640.188	339.348
			34.8	125.018	-33.8304		34.8	610.366	518.777
			34.9	212.17	-14.6518		34.9	705.357	557.839
			35	182.411	20.5893		35	619.58	394.723
			35.1	51.7857	68.1964		35.1	777.143	418.991
			35.2	95.2054	117.643		35.2	723.473	439.232
			35.3	33.875	126.75		35.3	647.723	387
			35.4	108.723	14.3036		35.4	710.259	402.089
			35.5	100.286	12.7946		35.5	660.804	497.321
			35.6	20.8482	35.3661		35.6	636.741	566.277
			35.7	130.518	102.884		35.7	608.607	459.268
			35.8	131.036	48.7589		35.8	827.679	396.893
			35.9	8.4821	-10.9375		35.9	626.509	329.732
			36	-60.0625	57.8304		36	671.723	367.688
			36.1	5.1696	116.938		36.1	647.321	468.589
			36.2	-1.3304	-5.5625		36.2	668.804	438.375
			36.3	-64.4732	-1.9821		36.3	566.134	380.384
			36.4	-8.9107	117.018		36.4	663.384	416.5
			36.5	21.7143	-41.1875		36.5	754.652	394.527
			36.6	-60.9196	-9.1339		36.6	687.509	458.571
			36.7	-14.6161	9.5625		36.7	666.295	332.205
			36.8	9.8482	60.6875		36.8	630.777	243.589
			36.9	-164.518	-57.5357		36.9	706.902	197.786
			37	-54.0625	-14.9821		37	790.268	452.973
			37.1	-54.7143	46.7768		37.1	762.696	402.589
			37.2	-5.5804	-54.1161		37.2	726.911	302.884
			37.3	-123.554	-70.1429		37.3	775.821	372.991
			37.4	31.1071	52.4554		37.4	749.527	439.75
			37.5	18.7679	-14.9821		37.5	525.438	363.17
			37.6	107.946	-29.1875		37.6	681.223	271.848
			37.7	82.6696	13.4732		37.7	620.875	327.036
			37.8	-55.7054	-22.0268		37.8	664.438	339.402
			37.9	5.7054	7.9732		37.9	621.348	327.045
			38	76.6339	-54.75		38	579.304	342.929
			38.1	262.384	35.3393		38.1	557.036	368.071
			38.2	74	24.9821		38.2	599.286	483.42
			38.3	130.955	62.4732		38.3	583.661	471.768
			38.4	102.5	53.7232		38.4	616.107	500.696
			38.5	92.9464	70.9018		38.5	607.688	322.589
			38.6	12.9286	-18.7054		38.6	653.17	312.848
			38.7	18.5	8.0089		38.7	689.009	525.848
			38.8	21.25	-18.7411		38.8	570.089	565.571
			38.9	91.9375	25.8839		38.9	784.464	532.973
			39	154.455	-22.3839		39	606.241	449.473
			39.1	103.768	-82.8393		39.1	678.161	458.473
			39.2	21.875	-72.8661		39.2	671.384	446.562
			39.3	-165.366	-51.0536		39.3	537.571	443.777
			39.4	-1.6786	-23.7321		39.4	663.5	320.946
			39.5	-120.08	-67.2143		39.5	556.589	451.295
			39.6	-13.0446	-24.6518		39.6	478.938	336.848
			39.7	-17.3125	-22.2054		39.7	350.848	369.482
			39.8	-193.527	-19.8571		39.8	446.277	263.143
			39.9	-118.821	5.4375		39.9	443.259	389.777
			40	-104.009	-95.4196		40	499.268	394.295
			40.1	-165.536	23.1875		40.1	652.491	378.009
			40.2	-27.5357	33.3661		40.2	535.17	293.464
			40.3	5.3661	6.8125		40.3	536.688	234.83
			40.4	-42.9732	-79.4018		40.4	622.179	359.25
			40.5	-78.3571	-51.6339		40.5	500.491	469.08
			40.6	-6.6696	-104.277		40.6	602.589	470.938
			40.7	-109.295	-34.5714		40.7	539.464	473.295
			40.8	-50.3482	-29.3125		40.8	540.821	461.902
			40.9	46.2054	92.0268		40.9	559.991	614.482
			41	159.929	60.8393		41	478.062	411.161
			41.1	-31.9643	-32.7857		41.1	557.518	414.116
			41.2	-35.0982	14.6964		41.2	478.634	391.991
			41.3	-4.8304	8.1875		41.3	444.393	481.304
			41.4	-12.2321	1.7321		41.4	565.884	336.125
			41.5	-4.1696	13.7232		41.5	564.804	396.643
			41.6	-25.5	5.9821		41.6	636.929	558.009
			41.7	44.0446	-67.9643		41.7	814.902	581.759
			41.8	0.125	-10.9554		41.8	770.938	638.759
			41.9	122.286	93.5446		41.9	719.411	649.25
			42	-9.2054	18.3304		42	799.312	572.312
			42.1	0.8304	-59.4018		42.1	701.33	358.036
			42.2	3.1518	-5.1339		42.2	690.893	471.964
			42.3	-31.6696	58.9286		42.3	444.938	627.58
			42.4	123.143	-42.8661		42.4	417.929	509.884
			42.5	92.5446	-9.3929		42.5	282.571	366.75
			42.6	46.8036	70.1607		42.6	287.839	186.134
			42.7	99.7232	-35.6786		42.7	212.759	93.0089
			42.8	114.143	28.0982		42.8	178.857	304.598
			42.9	100.089	21.6071		42.9	217.036	293.223
			43	195.321	70.3393		43	208.321	329.411
			43.1	-10.1339	86.9286		43.1	223.777	224.982
			43.2	86.7321	17.8214		43.2	123.375	101.527
			43.3	89.5446	-30.6161		43.3	212.812	210.036
			43.4	-4.5804	-180.554		43.4	126.938	204.661
			43.5	28.2589	48.875		43.5	67.8304	362.839
			43.6	67.8661	-57.7232		43.6	135.259	276.643
			43.7	-14.5536	13.6339		43.7	185.679	180.857
			43.8	-81.4732	-62.1429		43.8	304.848	261.696
			43.9	-8.5446	-24.2768		43.9	362.357	199.545
			44	-49.25	-57.9821		44	102.58	224.214
			44.1	46.5089	-8.3571		44.1	178.804	140.018
			44.2	65.4018	20.3304		44.2	178.545	148.08
			44.3	-35.6696	-3.5179		44.3	118.071	177.205
			44.4	47.1786	120.411		44.4	130.768	197.152
			44.5	-63.4286	-41.875		44.5	47.3839	76.6964
			44.6	-5.7321	-75.0536		44.6	195.786	142.92
			44.7	-88.9911	-0.9911		44.7	102.027	97.3304
			44.8	-27.4464	3.1161		44.8	279.866	59.1429
			44.9	128.098	44.3571		44.9	224.125	103.839
			45	178.589	-116.589		45	90	240.5
			45.1	-13.9732	-37.8393		45.1	89.8571	62.8393
			45.2	-55.7857	-99.9464		45.2	143.179	224.768
			45.3	-143.277	-55.0446		45.3	193.92	67.5536
			45.4	37.5714	-34.5536		45.4	163.875	146.366
			45.5	-93.6964	10.7589		45.5	46.4375	321.241
			45.6	75.4464	-1.5714		45.6	94.5	130.714
			45.7	112.562	-11.6607		45.7	150.446	98.2232
			45.8	6.5357	-25.8929		45.8	161.759	153.812
			45.9	84.4643	14.6786		45.9	97.5625	59.3214
			46	-19.9911	-79.7411		46	258.134	85.0625
			46.1	-97.3929	20.875		46.1	135.75	135.973
			46.2	-28.9911	27.8393		46.2	233.759	81.4821
			46.3	-93.1875	67.7946		46.3	269.545	186.018
			46.4	49.7946	55.1339		46.4	152.42	120.607
			46.5	14.4286	-95.9018		46.5	205.643	108.205
			46.6	8.7857	12.1875		46.6	35.4375	134.964
			46.7	-22.2679	-87.4018		46.7	59.9643	140.795
			46.8	35.5268	25.8393		46.8	-33.2857	163.759
			46.9	64.5982	74.1875		46.9	37.8304	96.8839
			47	-12.9911	12.7054		47	123.643	44.2768
			47.1	48.6518	-33.0625		47.1	127.688	-23.8839
			47.2	120.634	-89.2054		47.2	189.58	98.7679
			47.3	29.7232	34.6696		47.3	193.232	165.545
			47.4	-77.2679	21.3304		47.4	127.893	118.696
			47.5	-35.0893	-7.5446		47.5	145.723	-25.6607
			47.6	32.0089	-5.2321		47.6	176.08	110.179
			47.7	50.4107	-52.8125
			47.8	-4.1071	5.9107
			47.9	-23.5357	-61.2768
			48	17.4018	-34.6071
			48.1	114.518	8.4554
			48.2	127.473	-41.5357
			48.3	13.7857	-80.5893
			48.4	-68.8929	16.9821
			48.5	109.804	80.9464
			48.6	-17.1429	32.5
			48.7	146.473	-47.3393
			48.8	101.688	-105.223
			48.9	-21.4911	-2.9375
			49	42.9286	-33.9107
			49.1	-26.3929	17.9732
			49.2	-64.5	-10.75
			49.3	77.3214	-106.196
			49.4	-11.2411	17.3036
			49.5	9.25	14.7143
			49.6	105.938	-6.5179
			49.7	-7.0982	-98.9196
			49.8	142.795	31.1518
			49.9	74.9464	-58.8571

## Sheet: Figure 1H
Figure 1H
(Intensity)		Data for the plot plot								Data per vesicle
			Time (s)	mean GFP-Rab6	SEM	mean mCherry-KIF13B	SEM				GFP-Rab6	mCherry-KIF13B		GFP-Rab6	mCherry-KIF13B		GFP-Rab6	mCherry-KIF13B		GFP-Rab6	mCherry-KIF13B		GFP-Rab6	mCherry-KIF13B		GFP-Rab6	mCherry-KIF13B
			0	0.9445	0.1771	1.093	0.1663				0.2469	0.7409		0.9839	0.9442		1.0315	1.8258		0.7879	1.3073		1.5873	0.8511		1.0296	0.8885
			0.1	0.9837	0.1246	1.0752	0.1616				0.5368	0.307		1.174	1.1107		1.3112	1.3043		0.7586	1.4341		1.2342	1.1529		0.8873	1.1424
			0.2	1.1778	0.1363	1.2508	0.1679				1.557	1.2584		1.0964	0.9433		1.3471	1.6707		0.6218	1.7124		1.4031	1.2702		1.0412	0.6499
			0.3	1.187	0.1705	1.192	0.0996				1.8276	0.7636		1.0573	1.3168		1.1623	1.0535		0.6463	1.2705		1.4884	1.4323		0.9402	1.3152
			0.4	1.4753	0.3555	1.4165	0.1788				3.0092	1.3395		0.987	1.1535		1.4134	1.506		0.4114	0.7774		1.3407	1.6716		1.6901	2.0508
			0.5	1.3319	0.2757	1.2151	0.2598				2.312	0.7249		0.8807	1.0558		1.2156	1.0802		0.402	0.5237		1.8186	1.6581		1.3624	2.2481
			0.6	1.2238	0.2402	1.3198	0.2441				1.9986	0.6199		0.7986	0.9757		1.3285	1.285		0.3699	1.0945		1.6786	1.5991		1.1687	2.3444
			0.7	1.3125	0.2339	1.3597	0.1766				2.1912	0.9576		0.8587	1.1116		1.4084	1.4786		0.5265	0.9145		1.4716	1.7401		1.4186	1.956
			0.8	1.2892	0.2742	1.1696	0.1722				2.3223	1.0254		0.8418	1.0513		1.091	0.9645		0.6322	0.626		1.9145	1.7293		0.9336	1.621
			0.9	1.1803	0.294	1.0708	0.1795				2.3521	1.157		0.828	1.1202		1.2829	1.1885		0.2774	0.2025		1.5386	1.3773		0.8028	1.3794
			1
			1.1	0.957	0.1761	0.0867	0.0616				1.6862	-0.1068		0.7618	0.0423		1.1638	0.2641		0.4123	0.1657		0.8309	-0.0576		0.8873	0.2126
			1.2	1.1508	0.2002	0.038	0.1143				1.8078	0.102		0.76	0.0941		1.3501	0.3561		0.4397	-0.489		1.4184	0.0502		1.129	0.1147
			1.3	1.0746	0.1765	0.0043	0.0778				1.1804	-0.2798		0.7938	-0.0387		1.8211	0.2456		0.5473	0.1882		0.9892	-0.0115		1.1157	-0.078
			1.4	1.0838	0.2657	0.1715	0.1341				0.6997	-0.0896		0.8433	0.1913		1.1607	0.8153		0.5737	0.0757		2.3497	0.0332		0.8757	0.0030586
			1.5	0.899	0.3465	0.1748	0.0795				0.0873	-0.0076896		0.7658	0.0261		2.1624	0.1706		0.4152	0.3519		1.7166	0.0414		0.2466	0.4664
			1.6	1.0123	0.3352	0.0146	0.0903				0.2467	-0.1405		0.7743	0.0212		1.5395	0.3873		0.3274	-0.0368		2.4015	0.1071		0.7846	-0.2508
			1.7	1.2148	0.2153	0.1247	0.0419				1.5287	0.1162		0.8409	0.0058506		1.8861	0.0994		0.5756	0.135		1.6116	0.078		0.8459	0.3135
			1.8	1.3455	0.2957	0.1477	0.0938				2.0207	-0.1381		0.7019	0.1022		1.1481	0.4199		0.6633	-0.0286		2.4365	0.4191		1.1025	0.1116
			1.9	1.2393	0.4037	-0.1005	0.0849				1.4977	-0.3105		0.6917	0.0851		1.3246	-0.2752		0.9209	0.1841		2.963	-0.0373		0.0381	-0.2493
			2	1.392	0.3097	0.0904	0.0703				1.7188	0.2026		0.7581	0.0306		1.603	0.0972		0.7879	-0.1678		2.6678	0.0387		0.8161	0.341
			2.1	1.3247	0.3192	0.0141	0.0594				1.6567	-0.1757		0.7444	-0.0324		1.7818	0.1692		0.4095	0.0164		2.4882	-0.0888		0.8674	0.1957
			2.2	1.1976	0.2772	0.2025	0.1311				1.5254	-0.1662		0.6923	0.0774		1.4192	0.7478		0.2746	0.3417		2.2097	0.2279		1.0644	-0.0138
			2.3	1.3088	0.3716	0.1221	0.0467				1.2917	-0.0813		0.6645	0.0905		1.2083	0.2337		0.3737	0.1023		2.995	0.198		1.3193	0.1896
			2.4	1.2982	0.3882	0.063	0.1176				1.1036	-0.2203		0.7471	-0.0509		1.1044	0.3732		0.7039	0.4378		3.208	0.0658		0.922	-0.2279
			2.5	1.3015	0.2496	0.0064585	0.113				1.0984	-0.4164		0.738	0.0094509		1.6413	0.4466		0.5378	0.0573		2.123	0.0244		1.6703	-0.0826
			2.6	1.2017	0.294	0.1116	0.0881				0.8713	0.1281		0.7472	-0.0040504		1.3294	0.1447		0.7483	0.4992		2.6054	0.0407		0.9088	-0.1392
			2.7	1.1909	0.3265	-0.1284	0.0859				0.7906	-0.4386		0.7464	0.1796		1.9674	-0.1373		0.4331	-0.2271		2.4167	0.0122		0.7913	-0.159
			2.8	0.9418	0.1678	0.0138	0.0745				0.716	-0.2727		0.6996	0.1665		1.5025	0.0586		0.3954	-0.1064		1.2662	0.0122		1.071	0.2248
			2.9	1.1995	0.2419	0.1202	0.1781				0.5804	-0.6146		0.7002	0.0423		1.5867	0.6061		0.9851	0.0164		2.1625	0.1539		1.1819	0.5169
			3	0.9855	0.2243	0.1854	0.1283				0.3529	-0.2854		0.6905	0.0338		1.3967	0.6239		0.5756	0.4112		1.8064	0.1146		1.0909	0.2141
			3.1	1.2998	0.3851	0.00305	0.2202				1.3445	-0.826		0.6232	-0.0261		1.368	0.8465		0.2755	-0.0716		3.0087	0.198		1.1786	-0.1025
			3.2	1.0111	0.2031	0.1674	0.1611				0.7082	-0.4229		0.8631	-0.0626		1.4594	0.0534		0.6473	0.5544		1.7958	0.2611		0.5926	0.6209
			3.3	1.1149	0.3487	-0.0645	0.1384				0.474	-0.5054		0.7245	-0.1125		1.9538	0.3272		0.5095	0.268		2.4349	0.0258		0.5926	-0.39
			3.4	1.3805	0.3547	-0.1098	0.1167				1.1928	-0.4726		0.7425	-0.0567		1.7872	-0.3695		0.6926	0.0307		2.9539	-0.1133		0.9138	0.3227
			3.5	1.2571	0.2788	0.145	0.1044				0.9146	-0.1023		0.7035	-0.0162		2.1424	0.5089		0.7416	-0.0061375		2.1199	0.0624		0.9204	0.4236
			3.6	1.3166	0.2393	0.0947	0.1943				0.9429	-0.7737		0.7432	0.0648		1.4199	0.1743		0.9945	0.6751		2.3771	0.1587		1.422	0.2692
			3.7	1.3078	0.2141	0.0807	0.1302				1.5268	-0.2061		0.5802	0.1859		1.4885	0.5475		1.471	0.266		1.9921	0.0074597		0.7879	-0.3166
			3.8	1.1818	0.2226	0.1403	0.1571				1.7418	-0.3008		0.69	0.1553		1.5468	0.644		1.288	-0.043					0.6423	0.2462
			3.9	1.2668	0.318	0.1976	0.1675				1.9998	-0.0541		0.7238	0.279		1.9112	0.5371		1.3116	0.5381					0.3874	-0.312
			4	1.4235	0.2169	0.0754	0.047				2.1629	-0.1177		0.7283	0.0351		1.6258	0.1254		1.0464	0.2312		1.7973	0.1017		1.1803	0.0765
			4.1	1.1637	0.2293	0.0287	0.1303				1.8811	-0.3957		0.7234	0.0239		1.3089	0.5349		0.6879	0.1984		1.7471	-0.0122		0.634	-0.1774
			4.2	1.2286	0.2275	0.3614	0.2265				2.2175	-0.2975		0.7316	0.0927		0.9648	1.0876		0.7879	0.9595		1.4777	-0.0224		1.1919	0.3487
			4.3	1.2181	0.2243	0.0758	0.0743				1.9592	-0.2413		0.8476	0.1292		1.6808	0.2137		1.0379	-0.0389		1.3179	0.1702		0.4652	0.2217
			4.4	1.3092	0.1966	0.1293	0.081				2.055	0.0796		0.6649	0.0918		1.5376	0.0742		1.0502	0.5258		1.4564	0.0122		1.0909	-0.0076464
			4.5	1.1842	0.2914	0.2579	0.1143				2.4821	0.2878		0.6217	0.1179		1.5037	0.7968		0.6199	0.2209		0.8827	0.0997		0.9949	0.0245
			4.6	1.0774	0.2791	0.0502	0.0442				2.2309	0.2372		0.6056	0.0441		1.2414	0.0297		0.3114	-0.1023		1.327	0.0495		0.7482	0.0428
			4.7	1.156	0.2394	0.0284	0.1122				2.0975	0.4481		0.7453	0.1359		1.5154	0.0638		0.5794	-0.1248		1.2768	0.0251		0.7217	-0.3777
			4.8	1.2528	0.3613	0.1008	0.1556				2.0541	0.4587		0.7341	0.014		1.5951	0.0022257		0.1434	-0.3355		2.3725	-0.1892		0.6174	0.6545
			4.9	1.3877	0.3507	0.0315	0.1328				2.1155	0.4972		0.724	-0.0432		1.6557	0.3769		0.469	-0.2087		2.5841	-0.274		0.778	-0.159
			5	1.1002	0.3449	0.2758	0.1153				2.2755	0.4992		0.6015	0.1202		1.0862	0.3376		0.5992	0.6649		1.9343	-0.1153		0.1043	0.1483
			5.1	1.1447	0.2651	-0.0227	0.0424				2.0713	-0.0293		0.6309	-0.0891		1.6981	0.0935		0.5756	0.1125		1.3179	-0.1424		0.5744	-0.0811
			5.2	1.1036	0.2562	0.1878	0.1062				1.6365	-0.2393		0.5991	0.027		1.6032	0.3999		0.4973	0.2496		1.779	0.2184		0.5065	0.471
			5.3	1.1655	0.3025	-0.2092	0.1938				1.941	-0.2038		0.789	0.0414		1.3423	0.4169		0.0745	-0.4971		1.9921	-0.0522		0.8542	-0.9604
			5.4	1.2008	0.2803	0.1142	0.1684				1.6482	0.2416		0.6846	0.0473		1.5376	0.8139		0.1821	-0.448		2.0545	-0.0353		1.0975	0.0658
			5.5	1.2113	0.2971	0.1703	0.1027				1.5679	0.6202		0.5991	0.1692		2.0945	0.0772		0.4095	-0.133		1.8932	0.2224		0.7035	0.0658
			5.6	1.2024	0.2868	0.1326	0.1123				1.7799	0.1032		0.6899	0.0594		1.3812	0.6447		0.7039	-0.1391		2.2128	-0.0515		0.4469	0.1789
			5.7	1.1925	0.3489	0.0605	0.066				0.8589	-0.0426		0.7558	0.1283		1.5363	-0.0289		0.5435	-0.0573		2.7865	0.0027126		0.6737	0.3609
			5.8	0.967	0.3049	0.0805	0.1345				0.8457	-0.2115		0.6109	0.0612		1.5208	0.6588		0.3067	-0.0511		2.1899	0.2319		0.3278	-0.2065
			5.9	1.1058	0.3063	0.0886	0.1392				0.7701	-0.3833		0.6838	0.1292		1.2598	0.1714		0.2699	0.6588		2.4441	-0.0264		1.2068	-0.0184
			6	1.163	0.2923	-0.0676	0.1281				0.8108	-0.4504		0.5976	0.1467		1.5346	0.434		0.4595	-0.178		2.3817	-0.1038		1.1935	-0.2539
			6.1	0.7839	0.261	-0.0997	0.0863				0.3004	-0.4179		0.6404	0.0374		1.6674	-0.0764		0.2717	-0.1105					1.0396	0.0688
			6.2	0.9017	0.1721	0.1442	0.1431				0.6524	-0.3895		0.6275	0.1143		1.5645	0.4355		0.7766	0.313					0.8873	0.2477
			6.3	1.0802	0.3361	0.2634	0.1382				0.4014	-0.0070981		0.618	0.1472		1.3986	0.8992		0.803	0.2496		2.613	-0.019		0.6472	0.3104
			6.4	0.9819	0.3296	0.0511	0.091				-0.0213	-0.3366		0.4564	-0.0576		2.1503	0.27		0.8888	0.1637		1.709	0.0563		0.7085	0.211
			6.5	1.1697	0.3487	0.1707	0.1866				0.6778	-0.433		0.427	0.0473		1.7705	0.6781		0.7954	0.0634		2.6343	-0.0793		0.7135	0.7478
			6.6	1.0836	0.2786	-0.1081	0.0636				0.448	-0.1538					1.7374	-0.0527		0.7558	-0.045		1.7699	0.0414		0.7068	-0.3303
			6.7	1.3006	0.2458	0.1896	0.1536				1.5151	-0.3602					1.4523	0.3071		0.5246	0.4521		1.9814	0.0841		1.0296	0.4649
			6.8	1.3282	0.2273	0.1202	0.149				0.9991	-0.273					1.718	0.3954		1.0889	0.0696		2.0088	-0.1092		0.826	0.5184
			6.9	1.0758	0.299	0.0935	0.0603				0.9132	-0.0816					1.4786	0.2968		0.9879	0.1023		1.8886	0.0814		0.1109	0.0688
			7	1.2353	0.3011	0.1574	0.1386				1.3183	-0.197					1.6388	0.6224		0.6662	0.2741		2.088	0.0047471		0.4652	0.0826
			7.1	1.2628	0.2145	0.1325	0.1341				0.8048	-0.1541					1.8267	0.4644		0.9275	-0.1309		1.7334	0.0488		1.0214	0.4343
			7.2	1.2305	0.3724	0.1788	0.0757				1.1777	0.0816					1.5447	0.3784		0.7086	0.2537		2.4486	-0.0583		0.2731	0.2386
			7.3	0.937	0.2069	0.163	0.1258				0.5899	-0.0503					1.4747	0.3969		0.6747	0.4542		1.4062	-0.1967		0.5396	0.211
			7.4	1.3096	0.348	-0.1628	0.1335				0.9021	-0.0932					2.1905	0.2997		0.7096	-0.4071		2.1184	-0.1716		0.6274	-0.442
			7.5	1.4175	0.4263	0.1567	0.1881				0.7222	-0.3168					2.0013	0.8406		0.653	0.09		2.8154	0.0597		0.8955	0.1101
			7.6	1.1	0.238	0.4361	0.2479				0.7226	0.1082					1.9617	1.3896		0.82	0.4112		1.2707	0.0115		0.725	0.26
			7.7	1.2992	0.3259	0.1142	0.096				0.7895	0.0834					1.9362	0.3212		1.0266	-0.0327		2.2006	0.3431		0.543	-0.1438
			7.8	1.5592	0.4867	-0.0469	0.1687										1.8564	0.4006		0.7313	-0.2414		2.8063	0.0156		0.8426	-0.3624
			7.9	1.3261	0.4117	0.133	0.1918										1.9283	0.5371		0.5794	-0.3273		2.1412	-0.019		0.6555	0.341
			8	1.5113	0.534	-0.1074	0.1693										2.0796	0.1684		0.5784	-0.5953		2.7332	-0.0624		0.6539	0.0596
			8.1	1.1732	0.4042	0.1628	0.1898										1.7521	0.4993		0.7181	-0.3703		1.951	0.1736		0.2715	0.3487
			8.2	1.4303	0.4562	0.1834	0.1116										2.1453	0.4051		0.4831	0.0061375		2.2751	-0.0231		0.8177	0.3456
			8.3	1.5167	0.5697	0.0808	0.0564										1.941	0.1914		0.3888	0.045		2.2204	0.0061034
			8.4	1.2349	1.0707	-0.0982	0.0656													0.1642	-0.1637		2.3056	-0.0326
			8.5	1.0039	0.5998	0.0443	0.0331													0.1179	0.0348		2.1473	0.1058		0.7466	-0.0076464
			8.6	1.0249	0.4718	0.1627	0.265													0.1887	-0.1002		1.8216	-0.1044		1.0644	0.6928
			8.7	0.6597	0.1906	0.0979	0.1531													0.2802	-0.043		0.8811	-0.0671		0.8177	0.4037
			8.8	0.6644	0.3398	0.195	0.3553													0.2482	-0.2864		1.3377	-0.017		0.4072	0.8885
			8.9	0.7413	0.6505	0.6578	0.373													0.0774	0.8122		2.0423	-0.0515		0.1043	1.2127
			9	0.9288	0.6211	0.0789	0.1941													-0.0208	0.0327		2.0971	-0.2319		0.7101	0.4358
			9.1	1.1387	0.3422	0.3458	0.1478				0.8851	0.2934								0.3444	0.356		1.9464	0.0074597		1.3789	0.7264
			9.2	1.418	0.385	0.223	0.1195				1.3705	0.3682								0.4274	0.0511		2.2949	-0.008816		1.5792	0.4817
			9.3	1.2951	0.5706	0.2827	0.1543				1.3767	0.5211								0.418	0.5115		2.8793	-0.1343		0.5065	0.2325
			9.4	1.2532	0.3749	0.1458	0.217				1.2089	0.5128								0.2831	-0.3867		2.0986	-0.0292		1.422	0.4863
			9.5	1.1922	0.4159	0.1908	0.2028				1.3499	0.3561								0.5142	-0.3682		2.3056	0.1926		0.5992	0.5827
			9.6	0.989	0.3116	0.0452	0.1032				1.2318	-0.1127								0.1774	-0.0327		1.6512	-0.0224		0.8955	0.3487
			9.7	1.3392	0.4621	0.2932	0.1154				1.7719	0.6379								0.3001	0.2005		2.3878	0.1845		0.8972	0.1499
			9.8	0.9495	0.2935	0.0641	0.1736				0.8164	0.1148								0.3982	-0.3928		1.7806	0.0834		0.8028	0.4511
			9.9	1.0514	0.3829	0.2889	0.1533				0.9817	0.428								0.3755	0.5462		2.1382	-0.1519		0.7101	0.3334
			10	1.1323	0.38	0.0286	0.1777				1.7339	0.094								0.3859	-0.0675		1.8384	-0.3832		0.5711	0.471
			10.1	0.956	0.2944	0.2126	0.1384				1.1401	0.2407								0.3595	0.5319		1.6938	-0.1438		0.6307	0.2217
			10.2	0.9322	0.3161	0.2384	0.1388				1.0327	0.3638								0.1953	-0.0225		1.7212	0.0434		0.7797	0.5689
			10.3	0.7909	0.6467	0.0632	0.1681				2.0812	0.2786								0.2236	-0.268					0.0679	0.1789
			10.4	0.9695	0.5187	0.0939	0.271				1.9018	0.5581								0.1095	-0.3805					0.8972	0.104
			10.5	1.5466	0.765	-0.0515	0.0264				1.481	-0.1038								0.2538	-0.0143		3.7133	-0.0895		0.7383	0.0015293
			10.6	1.1825	0.3753	-0.1236	0.2145				1.5475	0.0065066								0.1774	-0.6935		1.916	-0.1424		1.0892	0.3349
			10.7	1.3962	0.5293	-0.1384	0.1956				1.2287	-0.1452								0.6029	-0.6608		2.9356	-0.0258		0.8177	0.2783
			10.8	1.0327	0.4348	-0.1494	0.1645				1.732	-0.4442								0.1302	0.313		1.8216	-0.1621		0.4469	-0.3043
			10.9	1.0879	0.3297	-0.0469	0.1365				1.3073	0.2088								0.3765	-0.4276		1.8947	0.0678		0.7731	-0.0367
			11	1.0766	0.3631	0.0178	0.1394				1.3115	-0.3812								0.1368	0.2557		1.8734	0.0515		0.9849	0.1453
			11.1	1.047	0.3557	0.1325	0.1154				1.1725	0.3582								0.2878	-0.1841		1.9662	0.1309		0.7615	0.2248
			11.2	1.1619	0.4129	0.2585	0.1683				1.2541	0.168								0.5076	0.4787		2.2949	-0.177		0.591	0.5643
			11.3	1.677	0.71	0.184	0.1789				1.4878	0.3218								0.5529	0.401		2.9904	-0.1709
			11.4	1.6023	0.8109	0.13	0.2397				1.2623	-0.16								0.3991	0.6056		3.1456	-0.0556
			11.5	1.2642	0.4214	0.00635	0.0714				1.4261	0.0322								0.4303	0.1555		2.3695	0.0258		0.831	-0.1881
			11.6	1.2721	0.5259	0.3102	0.1816				1.5836	0.4164								0.4888	-0.0123		2.6252	0.0597		0.3907	0.7769
			11.7	1.2097	0.4409	0.4384	0.3035				1.3239	1.1354								0.4218	-0.0798		2.4045	-0.0604		0.6886	0.7585
			11.8	0.771	0.291	0.0269	0.1937				1.0924	0.0337								0.5209	-0.27		1.3864	-0.2279		0.0844	0.572
			11.9	1.1282	0.3804	0.1752	0.1996				0.9778	-0.0639								0.7483	0.1248		2.2386	-0.1139		0.5479	0.7539
			12	1.0662	0.2546	0.0727	0.0955				1.0179	0.1943								0.6331	-0.0818		1.7927	-0.0983		0.8211	0.2768
			12.1	0.9788	0.3909	0.3467	0.1601				1.0462	0.0985								0.6209	0.5708		2.0347	0.0461		0.2135	0.6714
			12.2	0.7983	0.3786	0.1061	0.3743				0.9941	-0.0065066								0.2717	-0.4869		1.7851	-0.2719		0.1424	1.1898
			12.3	1.158	0.3319	0.2472	0.1577				1.365	0.2514								0.569	-0.0675		2.0043	0.1275		0.6936	0.6775
			12.4	0.9534	0.2843	0.3588	0.1924				0.708	0.0769								0.3076	0.6485		1.6177	-0.0197		1.1803	0.7295
			12.5	1.5319	0.4764	0.5343	0.2654				1.0899	0.669								0.4218	0.4542		2.5217	-0.1329		2.094	1.147
			12.6	1.4548	0.3956	0.0479	0.1376				1.628	0.1801								0.4312	-0.2169		2.3482	-0.1417		1.412	0.3701
			12.7	1.4793	0.3881	-0.0273	0.1523				1.5696	0.1431								0.5699	-0.4419		2.4532	-0.0597		1.3243	0.2493
			12.8	1.6409	0.4224	-0.00525	0.0961				1.6841	0.1216								0.6369	-0.2312		2.6997	-0.0949		1.5428	0.1835
			12.9	1.3697	0.3136	-0.0145	0.1341				1.5425	0.026								0.5567	-0.3908		2.0667	0.0637		1.3127	0.2432
			13	1.0919	0.3159	0.182	0.0933				0.7951	0.2094								0.468	0.2332		1.9373	-0.0787		1.167	0.364
			13.1	1.0785	0.1885	0.0202	0.194				0.9559	0.5551								0.6539	-0.2087		1.5538	0.0495		1.1505	-0.315
			13.2	1.2226	0.3596	0.1978	0.141													0.5397	0.2128		1.7592	-0.0536		1.369	0.4343
			13.3	1.1503	0.3017	0.2692	0.2316				1.1166	0.2026								0.4067	0.8838		1.8825	-0.2407		1.1952	0.2309
			13.4	1.1468	0.3951	0.0568	0.1923				0.9097	-0.1041								0.3944	0.6076		2.2584	0.00067815		1.0247	-0.2768
			13.5	1.1493	0.4082	0.1844	0.2235				0.792	0.8186								0.5454	0.1657		2.3528	-0.0617		0.9071	-0.185
			13.6	1.2778	0.3135	0.326	0.2017				0.8921	0.7027								0.7237	0.043		2.123	-0.0827		1.3723	0.6408
			13.7	1	0.2172	0.092	0.1479				1.1862	0.4321								0.6284	-0.268		1.5264	0.1946		0.6588	0.0091757
			13.8	1.0528	0.2697	0.0215	0.1821				1.1081	0.3824								0.5605	-0.1166		1.4899	-0.2014
			13.9	1.047	0.3595	0.0237	0.0895				0.6613	0.1437								0.7143	-0.1514		1.7653	0.0787
			14	1.3788	0.2938	0.0075333	0.0911				1.6177	0.1893								0.7945	-0.0941		1.7242	-0.0726
			14.1	1.1609	0.3575	0.0715	0.0454				1.3441	0.087								0.4708	0.1412		1.6679	-0.0136
			14.2	1.2019	0.4397	-0.1365	0.2454				1.2146	0.2014								0.434	-0.6137		1.9571	0.0027126
			14.3	1.714	0.7164	-0.0507	0.1826				0.9976	0.1319											2.4304	-0.2333
			14.4	1.2575	0.2888	-0.0032	0.1582				0.9687	0.155											1.5462	-0.1614
			14.5	1.4114	0.2246	0.1016	0.2616				1.1868	0.3632											1.636	-0.16
			14.6	1.9215	0.2639	-0.0916	0.1369				1.6575	0.0453											2.1854	-0.2285
			14.7	1.54	0.7672	0.1401	0.1265				0.7728	0.2665											2.3071	0.0136
			14.8	1.529	0.4859	0.1562	0.3901				1.0431	0.5463											2.0149	-0.234
			14.9	1.9986	0.1761	0.1707	0.0724				1.8225	0.2431											2.1747	0.0983
			15	1.5182	0.6612	0.2401	0.4463				0.857	0.6864											2.1793	-0.2062
			15.1	1.7774	0.8569	-0.1123	0.437				0.9204	0.3247											2.6343	-0.5493
			15.2	1.6054	0.8448	-0.02	0.374				0.7606	0.354											2.4502	-0.394
			15.3	2.1446	0.7925	-0.1	0.1902				1.3521	0.0902											2.9371	-0.2902
			15.4	1.8068	0.4501	0.0096	0.2246				1.3567	0.2342											2.2569	-0.215
			15.5	1.1621	0.4739	0.0707	0.0943				0.6882	0.165											1.636	-0.0237
			15.6	1.5123	0.6716	0.3131	0.3538				0.8407	0.6669											2.1838	-0.0407
			15.7	1.2345	0.1418	-0.0178	0.3558				1.3763	0.338											1.0927	-0.3737
			15.8	1.8223	0.0223	-0.029	0.3399				1.8	0.3108											1.8445	-0.3689
			15.9	1.5022	0.058	-0.3251	0.1293				1.5601	-0.1958											1.4442	-0.4544
			16	1.3024	0.3092	0.0779	0.3323				0.9933	0.4102											1.6116	-0.2543
			16.1	1.0508	0.2565	-0.2887	0.0633				0.7943	-0.2254											1.3073	-0.352
			16.2	1.4136	0.1402	-0.0625	0.2861				1.2733	0.2236											1.5538	-0.3486
			16.3	1.7743	0.7717	0.1238	0.4344				1.0026	0.5581											2.546	-0.3106
			16.4	1.663	0.5528	-0.0295	0.2214				1.1102	0.1919											2.2158	-0.2509
			16.5	1.082	0.1401	-0.1208	0.1084				0.9419	-0.0124											1.222	-0.2292
			16.6	1.2582	0.53	0.0564	0.1724				0.7282	0.2289											1.7882	-0.116
			16.7	1.8174	0.3451	-0.0627	0.2561				1.4723	0.1934											2.1625	-0.3187
			16.8	1.4643	0.3056	-0.0254	0.2954				1.1587	0.27											1.7699	-0.3208
			16.9	1.3083	0.6168	-0.0267	0.2642				0.6915	0.2375											1.9251	-0.2909
			17	1.456	0.5042	-0.2762	0.1535				0.9518	-0.4297											1.9601	-0.1227
			17.1	1.6239	0.0533	-0.132	0.2118				1.5706	0.0799											1.6771	-0.3438
			17.2	1.5368	0.4248	0.3038	0.2028				1.112	0.5066											1.9616	0.101
			17.3	1.3001	0.2278	-0.027	0.1737				1.0722	0.1467											1.5279	-0.2007
			17.4	2.0572	1.0732	0.1086	0.1452				0.984	0.2538											3.1304	-0.0366
			17.5	1.8735	0.7456	-0.1189	0.1497				1.1279	0.0308											2.6191	-0.2685
			17.6	1.6321	0.3539	0.2637	0.2868				1.2782	0.5504											1.986	-0.0231
			17.7	1.379	0.4776	-0.1083	0.1741				0.9014	-0.2824											1.8566	0.0658
			17.8	1.38	0.3625	0.164	0.0847				1.0175	0.2487											1.7425	0.0793
			17.9	1.8257	1.1435	-0.1144	0.0904				0.6822	-0.024											2.9691	-0.2048
			18	1.9627	1.0414	-0.0434	0.0109				0.9213	-0.0325											3.0041	-0.0543
			18.1	1.4902	0.5186	0.078	0.0861				0.9716	0.1641											2.0088	-0.0081378
			18.2	1.8413	0.6302	-0.0202	0.1852				1.2111	0.165											2.4715	-0.2055
			18.3	1.7392	0.6212	-0.0548	0.1284				1.118	0.0736											2.3604	-0.1831
			18.4	2.1935	0.456	-0.2131	0.1036				1.7374	-0.1094											2.6495	-0.3167
			18.5	1.1051	0.3026	-0.0347	0.1287				0.8025	0.094											1.4077	-0.1634
			18.6	1.1107	0.2255	0.1855	0.3359				0.8853	0.5214											1.3362	-0.1505
			18.7	1.108	0.4048	-0.4047	0.1862				0.7032	-0.5909											1.5127	-0.2184
			18.8	1.3625	0.6159	-0.1004	0.059				0.7466	-0.0414											1.9784	-0.1594
			18.9	1.3766	0.2883	-0.0488	0.0807				1.0883	0.0319											1.6649	-0.1295
			19	1.9106	0.8531	-0.2878	0.0506				1.0575	-0.2372											2.7637	-0.3384
			19.1	1.5089	1.0342	0.0516	0.4524				0.4747	0.504											2.543	-0.4008
			19.2	0.7651	0.3916	0.00035	0.4365				0.3735	0.4368											1.1566	-0.4361
			19.3	0.9493	0.0962	-0.021	0.078				0.8531	0.0571											1.0455	-0.099
			19.4	1.4962	0.6298	0.112	0.211				0.8663	0.323											2.126	-0.099
			19.5	1.8187	0.7077	-0.1822	0.1551				1.111	-0.3372											2.5263	-0.0271
			19.6	0.9493	0	0.5288	0				0.9493	0.5288
			19.7	1.3714	0	-0.0405	0				1.3714	-0.0405
			19.8	0.9533	0	0.2487	0				0.9533	0.2487
			19.9	0.8983	0	0.1863	0				0.8983	0.1863
			20	0.9739	0	-0.0861	0				0.9739	-0.0861
			20.1	1.6703	0	0.0494	0				1.6703	0.0494
			20.2	1.0001	0	0.0382	0				1.0001	0.0382
			20.3	0.9405	0	-0.0393	0				0.9405	-0.0393
			20.4	0.837	0	-0.0488	0				0.837	-0.0488
			20.5	1.2491	0	0.1304	0				1.2491	0.1304
			20.6	0.8366	0	0.4247	0				0.8366	0.4247
			20.7	1.3045	0	0.4963	0				1.3045	0.4963
			20.8	1.2126	0	0.4572	0				1.2126	0.4572
			20.9	1.2745	0	0.1363	0				1.2745	0.1363
			21	1.5355	0	0.1281	0				1.5355	0.1281
			21.1	1.3445	0	0.236	0				1.3445	0.236
			21.2	0.946	0	0.6397	0				0.946	0.6397
			21.3	2.0496	0	0.2097	0				2.0496	0.2097
			21.4	2.1762	0	0.538	0				2.1762	0.538
			21.5	1.0728	0	0.5628	0				1.0728	0.5628
			21.6	1.0371	0	0.289	0				1.0371	0.289
			21.7	1.1471	0	0.6829	0				1.1471	0.6829
			21.8	0.581	0	0.0352	0				0.581	0.0352
			21.9	1.3144	0	0.1263	0				1.3144	0.1263
			22	0.6367	0	-0.0491	0				0.6367	-0.0491
			22.1	1.016	0	0.286	0				1.016	0.286
			22.2	0.7579	0	-0.0423	0				0.7579	-0.0423
			22.3	0.5269	0	-0.1245	0				0.5269	-0.1245
			22.4	0.7468	0	0.1674	0				0.7468	0.1674
			22.5	1.059	0	0.042	0				1.059	0.042
			22.6	1.0429	0	0.0402	0				1.0429	0.0402
			22.7	0.7648	0	0.341	0				0.7648	0.341
			22.8	1.195	0	0.1594	0				1.195	0.1594
			22.9	0.5822	0	0.0097598	0				0.5822	0.0097598
			23	1.0053	0	0.6122	0				1.0053	0.6122
			23.1	0.7761	0	0.0201	0				0.7761	0.0201
			23.2	0.6429	0	0.1982	0				0.6429	0.1982
			23.3	0.7559	0	0.092	0				0.7559	0.092
			23.4	1.3375	0	0.2271	0				1.3375	0.2271
			23.5	1.0873	0	0.0432	0				1.0873	0.0432
			23.6	1.175	0	0.3437	0				1.175	0.3437
			23.7	1.252	0	0.3617	0				1.252	0.3617
			23.8
			23.9
			24	1.0455	0	0.1996	0				1.0455	0.1996
			24.1	1.2243	0	0.2186	0				1.2243	0.2186
			24.2	0.9355	0	-0.247	0				0.9355	-0.247
			24.3	0.8634	0	-0.2919	0				0.8634	-0.2919
			24.4	0.9252	0	0.6027	0				0.9252	0.6027
			24.5	1.2832	0	0.4277	0				1.2832	0.4277
			24.6	1.0065	0	0.6305	0				1.0065	0.6305
			24.7	1.1283	0	0.0104	0				1.1283	0.0104
			24.8	1.4587	0	0.6486	0				1.4587	0.6486
			24.9	0.8793	0	-0.1958	0				0.8793	-0.1958
			25	1.2483	0	1.0233	0				1.2483	1.0233
			25.1	1.2576	0	0.472	0				1.2576	0.472
			25.2	0.912	0	0.4209	0				0.912	0.4209
			25.3	0.9702	0	0.4611	0				0.9702	0.4611
			25.4	1.0639	0	0.5613	0				1.0639	0.5613
			25.5	0.8058	0	0.3144	0				0.8058	0.3144
			25.6	0.6169	0	0.0654	0				0.6169	0.0654
			25.7	1.1397	0	0.4268	0				1.1397	0.4268
			25.8	0.5473	0	-0.0704	0				0.5473	-0.0704
			25.9
			26
			26.1	0.8603	0	0.0606	0				0.8603	0.0606
			26.2	0.9485	0	0.6758	0				0.9485	0.6758
			26.3	0.6392	0	0.7287	0				0.6392	0.7287
			26.4	0.9037	0	0.5528	0				0.9037	0.5528
			26.5	0.6153	0	0.1532	0				0.6153	0.1532
			26.6	0.4992	0	0.5306	0				0.4992	0.5306
			26.7	0.8581	0	0.1934	0				0.8581	0.1934
			26.8	0.9636	0	0.0713	0				0.9636	0.0713
			26.9	0.7131	0	-0.4312	0				0.7131	-0.4312
			27	1.1116	0	0.1378	0				1.1116	0.1378
			27.1	0.8746	0	0.4605	0				0.8746	0.4605
			27.2	0.9576	0	0.5235	0				0.9576	0.5235
			27.3	0.6464	0	0.4989	0				0.6464	0.4989
			27.4	0.9566	0	0.2082	0				0.9566	0.2082
			27.5	0.5616	0	0.488	0				0.5616	0.488
			27.6	0.6277	0	0.0109	0				0.6277	0.0109
			27.7	1.0311	0	0.3383	0				1.0311	0.3383
			27.8	0.7526	0	0.1514	0				0.7526	0.1514
			27.9	0.6815	0	0.4492	0				0.6815	0.4492
			28	0.5924	0	0.7208	0				0.5924	0.7208
			28.1	0.6739	0	0.1316	0				0.6739	0.1316
			28.2	0.9749	0	0.682	0				0.9749	0.682
			28.3	0.816	0	0.6646	0				0.816	0.6646
			28.4	0.8913	0	0.724	0				0.8913	0.724
			28.5	0.9382	0	0.7885	0				0.9382	0.7885
			28.6	1.104	0	0.5318	0				1.104	0.5318
			28.7	0.8589	0	0.8435	0				0.8589	0.8435
			28.8	1.0344	0	0.8252	0				1.0344	0.8252
			28.9	0.7255	0	0.6915	0				0.7255	0.6915
			29	0.9008	0	-0.0772	0				0.9008	-0.0772
			29.1	0.8845	0	0.3505	0				0.8845	0.3505
			29.2	0.6467	0	0.2824	0				0.6467	0.2824
			29.3	0.765	0	0.5261	0				0.765	0.5261
			29.4	0.5271	0	0.5022	0				0.5271	0.5022
			29.5	0.676	0	0.4241	0				0.676	0.4241
			29.6	0.3925	0	0.5995	0				0.3925	0.5995
			29.7	0.7036	0	0.0887	0				0.7036	0.0887
			29.8	0.9559	0	0.2665	0				0.9559	0.2665
			29.9	0.6303	0	-0.0172	0				0.6303	-0.0172
			30	0.9675	0	0.2576	0				0.9675	0.2576
			30.1	0.5752	0	0.0257	0				0.5752	0.0257
			30.2	0.506	0	0.165	0				0.506	0.165
			30.3
			30.4
			30.5
			30.6
			30.7
			30.8
			30.9
			31
			31.1
