# Supplementary material for: Concerted action of kinesins KIF5B and KIF13B promotes efficient secretory vesicle transport to microtubule plus ends
Source: eLife. 2020 Nov 11;9:e61302. doi: 10.7554/eLife.61302 (PMC7710357; doi:10.7554/eLife.61302)
Supplement: Figure 2—figure supplement 1—source data 1. [file elife-61302-fig2-figsupp1-data1.xlsx]

## Sheet: Figure 2 - Figure supplement 1B
Figure 2 - Figure supplement 1B
(mm2)
		Control	KIF13B-KO	KIF5B-KO	KIF5B/13B-KO	4X-KO
		721.619	694.936	2139.45	458.094	426.515
		343.614	855.088	2378.18	565.414	298.776
		345.338	618.478	1498.78	397.064	541.68
		712.99	467.154	954.447	451.183	344.992
		431.85	416.029	2326.71	524.104	1092.28
		646.773	1647.36	1038.99	1201.79	1418.01
		1057.73	1370.95	1083.81	1072.09	1266.12
		1642.34	1594.53	965.774	739.824	780.975
		1530.12	637.005	1200.1	1590.02	1332.23
		1070.54	514.678	891.778	1065.62	1575.21
		959.429	1130.74	1248	829.585	807.32
		1217.51	965.769	680.867	1484.63	1351.03
		1254.2	980.051	1000.04	1007.96	1133.42
		1251.4	614.921	1136.8	886.086	668.332
		1392.06	725.62	1469.01	1223.25	1097.46
		1320.85	628.938	1287.37	1315.49	796.081
		540.867	1025	1463.2	938.719	824.292
		1597.06	733.842	1423.39	728.119	896.495
		1462.28	1038.34	1751.93	1145.03	1120.58
		1237.3	802.504	768.45	1000.18	1371.2
		1142	921.212	1814.58	985.25	922.14
		1219.98	960.113	1158.01	922.078	792.172
		1819.52	684.64	702.67	854.826	1216.78
		1630.71	829.585	1433.4	1093.8	935.676
		778.813	658.155	1067.41	1111.55	983.234
		764.365	763.904	1058.1	1006.06	639.058
		1262.99	913.991	1823.61	678.897	763.904
		883.255	569.105	1427.71	551.795	843.903
		1229.03	625.009	795.76	677.295	926.972
		1175.9	750.234	831.441	743.754	961.57
		970.554	626.139	766.755	736.154	786.651
		1332.65	1026.35	1045.68	1044.76	674.594
		1338.78	649.706	1479.07	762.364	734.443
		880.756	592.811	710.327	665.18	836.957
		1186.06	634.465	1137.38	883.634	619.54
		1861.33	1497.98	711.717	805.998	1103.01
		1071.11	867.154	1085.94	1446.98	833.618
		903.431	726.952	1136.54	1856.56	698.575
		732.676	797.952	690.146	1091.43	937.879
		642.344	1340.59	837.46	893.063	1013.4
		897.511	764.552	1152.79	1260.82	853.1
		1107.79	882.555	1156.33	827.932	1054.31
		1042.55	1453.71	867.112	631.634	1316.41
		967.044	844.79	1382.12	1242.64	722.878
		1430.71	1053.67	1255.65	1083.18	960.74
		1156.76	711.1		1070.53	744.837
		1352.1	976.692		1260.28	813.022
		1153.06	875.484		925.769	880.119
		838.211	1299.68		703.687	925.966
		807.688	714.308		861.778	1088.85
		848.165	715.605		747.102	1275.03
		847.288	815.148		1047.06	820.435
		1123.32	1158.3		1247.17	1185.72
		1554.27	1426.96		897.096	829.305
		1101.51	888.667		1160.07	969.211
		1229.1	672.582		1725.72	1199.84
		880.777	668.855		907.879	965.598
		921.326	1003.37		961.331	1013.49
		941.798	934.375		1168.7	1006.29
		699.239	642.692		1025.46	1328.83
		1246.94	972.581		1166.22	966.069
		1286.85	928.247		1092.29	1297.93
		1021.55	961.917		721.742	907.356
		1553.16	870.072		866.418	905.743
		1231.17	1107.54		833.173	1005.43
		1385.55	915.396		852.965	705.2
		1340.05	1061.5		991.378	1010.43
		910.056	993.12		935.738	957.485
		865.909	972.327		1199.32	815.884
		1364.51	1059.43		678.311	641.022
		1121.81	700.752		954.831	787.838
		1202.91	932.612		805.402	1157.88
		1331.32	916.873		756.786	648.56
		1221.34	704.07		1106.52	992.218
		1178.94	1031.17		585.979	1187.38
		1252.16	556.254		933.255	1075.87
		1022.17	1023.39		990.802	835.723
		1173.71	1127.56		1041.53	1162.72
		1365.09	882.555		1069.36	1318.48
		1340.01	855.614		924.38	840.456
		1582.75	842.405		966.837	944.743
		1015.83
		1226.8
		1268.59
		1130.97
		888.942
		904.183
		675.403
		776.154
		1159.22
		1105.08
		1298.74
		1533.27
		1119.31
		1268.13
		1217.28
		1058.97
		821.923
		978.978
		1178.89
		937.262
		1082.06
		1470.54
		1141.63
		1056.85

## Sheet: Figure 2 - Figure supplement 1C
Figure 2 - Figure supplement 1C
(number of vesicles /cell area)
		Control	KIF13B-KO	KIF5B-KO	KIF5B/13B-KO	4X-KO
		0.152644	0.13181	0.121053	0.0960622	0.0647778
		0.143529	0.0954513	0.161664	0.0662515	0.0730057
		0.113184	0.140114	0.157393	0.0815445	0.0618417
		0.149942	0.0817227	0.12164	0.0828609	0.0740083
		0.108338	0.0550133	0.133703	0.076934	0.10667
		0.145233	0.102022	0.0825473	0.105081	0.0502698
		0.10872	0.0959579	0.0935144	0.128239	0.0638097
		0.117947	0.0808265	0.2031	0.143243	0.069168
		0.109757	0.100438	0.187034	0.108015	0.0801465
		0.0755242	0.137927	0.106482	0.161602	0.0563882
		0.0990374	0.0849362	0.165623	0.0618911	0.0319794
		0.153431	0.145403	0.147729	0.103698	0.0613554
		0.113058	0.109995	0.139995	0.109424	0.0853163
		0.0733465	0.10556	0.149524	0.0974729	0.0716351
		0.0853377	0.133424	0.12145	0.119127	0.0658808
		0.0960056	0.114186	0.11396	0.0802247	0.131637
		0.11013	0.0963642	0.0868978	0.125885	0.0565057
		0.108539	0.147535	0.147412	0.154944	0.077173
		0.107242	0.138134	0.148681	0.0818916	0.0794461
		0.11012	0.097599	0.125588	0.0799668	0.0750099

## Sheet: Figure 2 - Figure supplement 1D
Figure 2 - Figure supplement 1D
(%)
		Control	32.3529
		KIF13B-KO	15
		KIF5B-KO	77.7778
		KIF5B/13B-KO	73
		4X-KO	75
