# Supplementary material for: Concerted action of kinesins KIF5B and KIF13B promotes efficient secretory vesicle transport to microtubule plus ends
Source: eLife. 2020 Nov 11;9:e61302. doi: 10.7554/eLife.61302 (PMC7710357; doi:10.7554/eLife.61302)
Supplement: Figure 2—figure supplement 2—source data 1. [file elife-61302-fig2-figsupp2-data1.xlsx]

## Sheet: Figure 2 - Figure supplement 2D
Figure 2 - Figure supplement 2D
(% Rab11 enrichment in the Golgi area)
		Control	4X-KO	4X-KO + KIF1B/1C
		33.3069	80.6101	36.9953
		76.622	92.1397	45.7619
		11.6274	156.488	64.0379
		72.2141	142.908	26.3918
		36.4274	26.3986	1.69681
		50.7621	64.6542	31.8363
		42.5101	54.1728	14.788
		45.7471	47.3523	134.576
		67.6309	78.9435	69.1396
		46.7446	132.554	42.8731
		32.2561	42.0772	55.3693
		36.5604	48.2375	94.6314
		37.0665	71.2917	104.504
		21.4856	68.9831	73.2839
		19.684	126.234	29.1311
		26.0549	85.5411	64.4337
		-13.2282	75.4601	33.4172
		-7.71858	92.654	76.7279
		33.8742	66.7685	80.7257
		29.4619	57.7291	81.9158
		60.5751	101.191	54.4752
		52.0737	94.7141	13.4361
		3.49936	118.151	29.3632
		28.3203	115.747	79.2758
		16.5902	65.2511	115.931
		49.2426	204.083	70.4228
		35.1452	141.712	95.657
		69.7512	45.6118	80.0292
		95.2584	270.877	97.454
		41.3782	65.8012	100.384

## Sheet: Figure 2 - Figure supplement 2E
Figure 2 - Figure supplement 2E
(Number of runs /100 mm2/50 s)
		Control siRNA	Eg5 siRNA
		10.3173	77.2932
		47.2236	79.9429
		32.6162	44.0935
		54.1141	79.1112
		98.9919	67.8147
		15.7626	61.2918
		48.1257	105.22
		110.028	45.7606
		84.0317	61.4729
		41.7707	52.1043
		23.6194	24.5146
		36.3178	44.53
		82.4297	104.184
		57.3525	42.5565
		81.7826	89.8602
		61.45	45.5071
		71.5237	64.7286
		79.1313	112.873
		29.485	41.9212
		58.5289	103.849
		84.6851	62.0533
		75.1994	71.5763
			29.4793
			53.4276

## Sheet: Figure 2 - Figure supplement 2G
Figure 2 - Figure supplement 2G
(ratio)
		Control	KIF13B-KO	KIF13-KO mixed	KIF5B-KO	KIF5B/13B-KO	4X-KO	4X-KO + KIF13B	4X-KO + KIF5B	4X-KO + KIF1B/1C	4X-KO + Eg5
		7.73109	6.11817	4.18463	2.83391	7.09011	1.90726	7.02523	6.73242	8.76285	12.8929
		4.34933	4.76371	3.72404	2.68654	3.23249	2.19983	5.46211	4.51861	5.1291	3.94851
		7.05647	4.87847	3.66891	2.31939	6.76249	2.9922	8.07422	6.04107	7.28146	6.26656
		4.54387	6.08935	3.34367	1.92582	5.4645	3.06833	6.74932	6.18218	4.38395	3.4359
		5.76586	6.25074	2.7816	1.84534	7.03383	9.54172	4.55549	5.03665	8.16555	2.57567
		7.04697	7.37676	3.35073	6.32374	7.43124	9.42157	4.93266	6.90201	8.41859	3.97159
		6.39254	8.83778	4.081	0	11.6054	14.8754	6.59838	5.50681	7.48269	4.05165
		5.14445	5.03951	3.32114	5.14683	11.3419	6.10405	6.43281	7.06259	3.92083	2.44646
		3.93066	5.74726	3.34422	9.81609	5.33991	5.1279	5.66405	4.38353	4.47986	3.34047
		3.53436	4.60772	3.86024	8.85302	7.18787	7.51003	3.62781	4.45502	5.0182	4.34009
		5.00694	7.37185	4.11155	5.58023	0	8.39823	4.82527	6.23119	8.45736	8.05564
		4.48311	4.71366	3.52709	0	9.28404	8.33933	5.89975	7.1641	4.13426	6.71141
		4.04842	7.16751	3.69652	8.62456	5.67431	2.9922	5.10717	3.90143	8.48377	4.1848
		5.50203	8.40283	3.61303	8.55956	5.39246	12.078	5.91564	4.89145	6.02691	13.5817
		5.35414	5.39817	4.24533	4.64194	5.72233	4.40701	5.72227	4.93873	6.11839	5.01295
		4.6067	5.40995	2.69985	4.90319	5.40672	6.41901	4.99837	3.52257	4.96266	8.78951
		4.78894	0	2.49552	10.198	4.3612	9.63802	8.40624	4.13677	6.36824	5.36597
		6.06089	9.17587	3.51806	4.47854	5.94371	4.73773	7.89327	3.88106	7.36311	7.73726
		4.42535	8.8951	3.5222	6.25969	10.1327	7.4779	4.87154	5.53934	0	6.94675
		4.94896	6.73194	3.51984	6.65493	7.84532	6.46797	6.25457	4.86632	9.84386	15.6811
		9.28216	5.83115	5.64178	5.98447	5.79467	10.2027	5.08299	4.45017	6.1736	6.5791
		6.09199	5.58768	3.5534	0	6.27933		3.63471	3.72907	3.28669	11.4454
		5.79439	7.73275	3.38841	5.12902			4.15744	3.75499	12.0731	5.0518
		6.36358	6.24802	5.6555	7.59876			5.69328	3.76587	4.4325	16.0338
		5.50103	5.81889	6.11601	10.1679			4.18908	4.02308	5.09316	7.31331
		6.05155	8.25637	0	10.6414			3.67618	3.91768	2.99371	5.24362
		3.508	4.98947	5.35827	7.53191			3.66788	2.83626	2.21099	2.88204
		6.14402		3.88073				3.6178	5.43013	3.76992	7.94086
		3.85364		5.62802				4.56133	3.79654	3.73339	7.18074
				4.98433				4.69061	4.69777	5.65661	6.93234
