# Supplementary material for: Concerted action of kinesins KIF5B and KIF13B promotes efficient secretory vesicle transport to microtubule plus ends
Source: eLife. 2020 Nov 11;9:e61302. doi: 10.7554/eLife.61302 (PMC7710357; doi:10.7554/eLife.61302)
Supplement: Figure 2—source data 1. [file elife-61302-fig2-data1.xlsx]

## Sheet: Figure 2D
Figure 2D
(Number of runs /100 mm2/50 s)
		Control	KIF13B-KO	KIF13B-KO mixed	KIF5B-KO	KIF5B/13B-KO	4X-KO
		23.1561	17.1976	23.1914	8.2224	0.1115	0.1536
		22.9214	38.5939	25.7527	2.7144	1.3437	0.525
		21.8154	34.7775	33.0351	3.0581	2.3916	5.201
		63.9581	23.6556	69.4272	2.0992	4.5388	1.9477
		40.2729	38.3522	44.4988	8.8616	5.5126	8.5134
		11.3	62.6705	47.3353	15.7598	7.7408	4.8202
		19.8513	45.9803	26.4182	10.3212	2.9456	0.636
		6.6623	17.6659	23.3624	10.755	7.4673	3.0447
		71.9451	21.9915	23.442	5.9963	5.7067	6.5191
		38.9136	19.533	39.7241	26.3928	4.9431	2.5893
		31.9144	11.3787	39.6068	4.0962	3.4856	4.4823
		61.551	46.4654	31.0464	13.6545	5.637	13.3013
		28.418	50.8093	31.1218	9.729	5.3599	9.5154
		39.4263	50.4467	96.6389	7.8769	11.8343	3.0489
		71.6198	28.6158	30.7298	4.3	6.1327	5.5789
		73.1483	34.3444	37.3813	16.2187	7.7719	10.7484
		36.9048	30.0577	42.3394	7.454	4.5666	4.3021
		48.9017	20.1193	36.9627	19.8771	2.4815	2.2154
		58.3499	22.4293	67.5391	6.6675	1.8304	9.7803
		40.4799	35.6062	49.6498	22.3912	4.2861	7.2021
		24.9888	71.7042	21.2598	8.8878	4.8116	2.4833
		18.1646	38.7442	46.4465	4.8754	2.5904
		57.0637	28.5557	81.4022	8.1628
		43.2047	23.0665	51.8154	8.5809
		36.5837	53.8652	27.8146	6.2704
		16.2761	21.405	26.1284	15.1548
		26.1258	68.3748	23.2611	13.3447
		14.9372		30.0141
		18.5599		16.6275
				10.1633

## Sheet: Figure 2F
Figure 2F
(Number of runs /100 mm2/50 s)
		Control	4X-KO	4X-KO + KIF13B	4X-KO + KIF5B	4X-KO + KIF1B/1C	4X-KO + Eg5
		46.5867	7.0346	4.2213	30.9664	6.8634	6.0143
		61.6431	7.6788	38.097	24.0033	4.8017	5.75
		32.3707	8.833	28.2921	36.8383	5.1841	4.0151
		35.7936	2.4441	22.5344	48.2155	12.0217	2.0077
		74.3822	2.6436	48.3563	31.9154	4.4982	2.7255
		42.3276	9.8507	25.6063	17.0671	8.634	4.8881
		93.0189	5.9017	18.6096	40.3671	5.0369	5.0129
		71.8736	5.0414	18.2631	14.8437	3.9579	3.4288
		57.3024	5.4574	12.1075	52.7702	10.2133	1.7762
		46.9214	6.4246	61.6711	25.7184	21.289	4.6113
		26.5631	6.3303	14.9056	13.5805	3.07	5.2981
		33.2773	2.4919	6.9602	21.042	10.625	5.7963
		41.234	1.9497	62.3558	21.5337	5.2312	4.3578
		40.729	3.908	42.8828	32.3887	1.9437	2.6147
		40.149	3.0852	41.5985	12.3458	10.2688	8.9648
		45.9037	1.5987	50.7559	39.3015	3.1868	6.3223
		21.2321	5.465	30.4985	44.0924	5.5953	9.0914
		38.1377	5.3952	9.9655	27.4188	4.8366	4.0121
		52.2829	7.2109	14.016	20.2486	3.532	3.1113
		20.8678	14.2774	6.5136	32.4477	3.1493	2.455
		38.4587	4.8805	44.8806	32.5203	0.9019	4.8267
		23.5139	0.7234	91.5707	13.4805	2.0671	2.2551
		11.5456	3.1766	46.039	16.4566	0.6549	9.799
		8.5405	9.4245	18.8169	18.0634	2.0972	2.9873
		2.6271	0.2072	65.3644	15.7389	1.9069	5.7307
		10.2234	3.4819	25.8806	37.8224	0.6755	7.8954
		16.7363	1.3711	103.851	17.3125	1.1246	1.7705
		4.9284	3.739	88.9312	34.5308	3.748	9.2028
		26.2684	5.5656	19.7313	17.5258	1.0344	5.8753
		24.0165	7.769	35.7717	9.44	1.4317	6.0562
		9.1806
		32.201
		25.8357
		39.934
		42.6974
		17.497
		43.5338
		51.1996
		42.1059
		22.1101

## Sheet: Figure 2G
Figure 2G
(%)
		Control	KIF13B-KO	KIF13B-KO mixed	KIF5B-KO	KIF5B/13B-KO	4X-KO	4X-KO + KIF13B	4X-KO + KIF5B	4X-KO + KIF1B/1C	4X-KO + Eg5
		2.31391	3.01705	8.46994	6.12903	0.03885	0.0284495	0.263476	5.86826	1.18662	0.787143
		3.8817	7.36936	4.62758	3.88128	1.92308	1.04167	3.73902	4.39205	1.72107	1.6386
		2.19372	17.6387	10.9907	1.60428	1.8412	4.60177	1.39807	6.35118	1.20182	0.923532
		9.88003	6.39456	13.401	1.8018	2.5974	3.9088	1.84765	8.04196	1.67224	0.580832
		10.7517	8.56814	10.2509	6.05351	4.50161	2.37681	4.59711	5.41299	0.685602	1.83398
		2.79851	12.5379	11.4914	2.25866	1.11535	0.4258	3.79299	2.01976	1.65171	1.30802
		4.2144	5.01282	3.52727	0	0.895857	0.0606244	1.42566	3.67785	0.509554	2.6149
		1.05524	6.34921	7.00246	3.26296	1.00777	0.842697	2.24753	1.44128	0.701861	2.16648
		11.8793	4.90248	8.10565	1.91816	0.753985	0.946008	1.32782	6.35366	1.93316	0.876424
		15.2218	13.0307	6.74457	5.20505	1.35699	0.395968	5.58555	4.44901	4.5106	1.90355
		12.4514	2.85885	5.4513	3.9749	0	1.15752	1.10137	3.48837	1.06178	1.12069
		11.7584	9.61896	11.8644	0	1.03141	3.00188	0.353762	2.89855	2.77567	0.561527
		11.1651	6.22711	11.6346	0.393848	1.75439	4.15561	4.93121	4.10156	0.818554	1.81477
		7.71221	2.31086	15.4423	2.61375	3.51076	0.490517	4.0795	6.08365	0.56277	0.363433
		9.81194	14.4158	4.56034	3.45395	3.20856	2.14955	2.83738	2.21363	1.28625	1.52629
		8.81438	1.14817	9.97693	5.24044	2.38095	1.01578	4.27181	6.26466	0.551181	0.995733
		6.98835	0	9	3.50427	1.72176	0.81266	1.8162	7.8722	1.1322	1.59615
		5.78803	1.63158	7.79274	3.36135	1.7331	0.771513	0.808362	4.87952	0.819672	0.804424
		7.08861	4.15523	11.5385	3.68609	1.54143	1.22286	1.93456	2.16532	0	0.478755
		8.35082	7.29927	10.6778	5.72152	1.51844	1.38198	0.61607	4.77654	0.490731	0.159005
		1.90224	7.36	3.31447	2.51572	1.75	0.797546	7.38255	6.48885	2.33645	0.729794
		5.72139	9.91053	6.60741	0	2.60586		8.01029	6.05778	5.53191	0.594354
		11.3938	6.87831	9.94152	3.5865			4.76587	3.64716	0.821918	1.04012
		6.80487	3.5728	5.70303	1.4275			2.15343	6.51444	3.96601	0.212709
		7.99543	9.38381	3.66322	0.726392			6.56597	4.71436	0.984849	1.20915
		2.38896	3.65714	0	2.11988			2.64328	6.34624	0.786164	2.21502
		6.97828	11.7582	2.97912	1.40731			10.1303	7.44849	1.94384	0.809717
		1.89406		5.23435				7.16377	5.82524	3.47395	1.26963
		4.02277		2.27618				1.70545	5.14905	2.34375	0.435754
				1.13636				5.26939	2.16718	1.2987	0.558069

## Sheet: Figure 2H
Figure 2H
(%)
		Control	KIF13B-KO	KIF13B-KO mixed	KIF5B-KO	KIF5B/13B-KO	4X-KO	4X-KO + KIF13B	4X-KO + KIF5B	4X-KO + KIF1B/1C	4X-KO + Eg5
		2.9826	3.18711	3.32502	6.71031	0.0549601	0.0271234	0.573327	4.873	2.04529	1.14478
		3.11118	5.7302	2.422	1.69183	2.79923	0.607712	4.42421	2.50791	1.10673	0.810961
		2.50256	11.9561	5.56048	0.615147	1.38782	2.53118	2.4017	4.59807	1.33005	0.800245
		7.40741	6.439	7.78687	0.979263	1.84881	2.16237	2.58221	6.28556	1.68538	0.346961
		11.6622	9.30285	6.06757	5.54201	3.78897	3.55247	4.49038	4.03143	1.69131	0.73847
		4.11148	14.8755	5.08612	2.92324	1.51187	0.722651	4.92451	1.98557	2.14055	0.869424
		4.97588	9.58578	1.84002	0	1.61638	0.139231	2.27958	2.66067	0.601968	1.66419
		0.849024	4.87585	3.95319	2.07037	1.54322	1.47952	2.98741	1.41322	0.525727	1.07829
		8.82862	6.58497	3.78728	3.50523	1.40841	0.950357	1.86098	4.65487	1.16754	0.470693
		8.80659	9.15544	3.66322	7.91405	2.44094	0.947148	5.44003	2.9347	4.8723	0.988571
		10.9835	2.54301	3.69947	4.17751	0	1.91625	1.55719	2.33316	0.894601	1.43034
		9.42683	8.70643	6.87658	0	1.15697	2.61232	0.543802	2.23723	2.04727	1.18253
		7.11925	7.90098	5.71583	0.834982	1.59727	3.4707	5.40587	2.03743	1.83853	0.847954
		7.60486	4.01751	10.0004	3.33438	2.60982	1.02526	5.38234	3.41663	0.661568	0.666696
		12.4158	14.7504	2.99379	3.00907	1.89973	2.48892	4.69413	1.57171	1.70118	1.16875
		8.60874	1.73002	4.88104	3.516	2.50553	1.9041	5.00947	3.23101	1.00103	1.91171
		5.90855	0	3.60706	4.16926	1.77731	1.54945	3.57538	4.8075	2.42784	1.70342
		7.79122	3.03261	3.82717	2.57121	2.36251	0.852445	1.69402	2.52201	1.02533	1.14094
		6.17196	5.99982	6.70957	3.78986	2.59802	2.49356	2.78837	2.50355	0	1.08139
		6.0185	7.4985	6.67422	7.47871	1.44564	1.68802	1.34801	3.18218	0.855978	0.450224
		3.16878	6.86109	3.43964	2.76376	1.60593	0.725205	6.26269	3.64411	1.26122	0.863769
		4.30327	8.72758	4.94991	0	2.09544		7.20534	3.16624	2.20386	0.757664
		12.3696	6.48475	7.41999	2.85859			5.71134	2.00545	1.01059	1.82386
		8.37944	3.80616	5.13131	1.7921			3.32685	4.23006	3.14339	0.514166
		6.69694	8.68872	4.75212	1.05507			7.05262	2.29834	0.647625	1.40883
		3.65788	5.29512	0	3.03083			3.13459	4.47664	0.790372	1.4028
		3.67716	11.1915	3.44906	1.93783			7.08205	3.53366	1.03036	1.11767
		2.07942		3.60787				6.83864	4.62789	1.6971	1.88918
		2.27976		2.53944				1.76174	3.54991	1.24066	0.457326
				1.17519				6.70853	1.53824	0.982456	0.674549

## Sheet: Figure 2I
Figure 2I
	Histogram		(Processive movement fraction)											Raw data
		Bin Center	Control	KIF13B-KO	KIF13B-KO mixed	KIF5B-KO	KIF5B/13B-KO	4X-KO	4X-KO+ KIF13B	4X-KO + KIF5B	4X-KO + KIF1B/1C	4X-KO + Eg5			Control	KIF13B-KO	KIF13B-KO mixed	KIF5B-KO	KIF5B/13B-KO	4X-KO	4X-KO+ KIF13B	4X-KO + KIF5B	4X-KO + KIF1B/1C	4X-KO + Eg5
		5.96046e-08	0.306821	0.368063	0.670627	0.807175	0.809717	0.899281	0.0567215	1.07583	0.360144	1.30641			0.04	0.219512	0.0297872	0.2	0.2	0.5	0.25	0.0207101	0.327586	0.0698925
		0.0500001	7.55251	6.71008	10.4043	9.86547	14.17	7.01439	3.04405	12.254	10.2041	11.7577			0.32	0.148649	0.232877	0.17734	0.134328	0.32	0.333333	0.311321	0.0301724	0.0283912
		0.1	10.3847	10.1076	12.0713	14.1704	14.3725	8.63309	7.128	14.4319	12.605	13.1829			0.104167	0.428571	0.189655	0.0391061	0.407407	0.127273	0.290323	0.0592885	0.11039	0.444444
		0.15	10.6679	11.0419	10.3468	11.3004	8.70445	10.4316	9.11325	13.6447	10.8043	9.14489			0.340206	0.241379	0.02	0.05	1	0.5	0.288461	0.118971	0.169491	0.102564
		0.2	9.08662	10.6738	9.65702	9.86547	9.51417	9.35252	10.1153	11.5455	10.5642	10.3325			0.128571	0.690909	0.203704	0.647059	0.785714	0.666667	0.126582	0.367347	0.269231	0.0329218
		0.25	9.67666	9.96603	9.42709	7.44395	10.1215	13.3094	10.9851	9.63002	9.48379	8.7886			0.259259	0.37931	0.421053	0.0810811	0.368421	0.156863	0.26087	0.204082	0.132076	0.785714
		0.3	9.67666	9.71121	8.56486	7.98206	8.09717	8.99281	11.2119	9.4201	9.2437	7.95725			0.12766	0.0379147	0.0496894	0.080292	0.681818	0.233766	0.619048	0.493507	0.130435	0.0527638
		0.35	9.01581	8.60702	7.85591	7.0852	5.46559	9.35252	10.7582	7.29467	7.68307	7.00713			0.161616	0.228571	0.077748	0.328889	0.391304	0.233333	0.457627	0.580645	0.323529	0.909091
		0.4	6.20722	6.00227	5.959	5.38117	4.45344	5.21583	7.56287	4.69693	5.40216	5.46318			0.156863	0.35	0.0883978	0.186047	0.0480769	0.73913	0.233333	0.581395	0.0567376	0.25
		0.45	5.07435	4.84145	4.88599	4.66368	3.84615	6.47482	6.39062	3.64734	4.44178	3.80048			0.243137	0.368421	0.0243056	0.178947	0.333333	0.183673	0.458333	0.365854	0.96	0.0656934
		0.5	4.01227	4.7282	3.35313	3.40807	3.03644	3.23741	4.2352	2.5715	2.52101	3.80048			0.243243	0.0902256	0.097561	0.150794	0.0555556	0.234043	0.625	0.0636943	0.766667	0.0842105
		0.55	3.28062	3.68063	3.37229	2.42152	2.42915	2.8777	4.12176	2.28287	1.68067	2.49406			0.666667	0.230769	0.126984	0.135294	0.109589	0.133333	0.0941176	0.12749	0.148148	0.166667
		0.6	3.30423	3.22763	2.29929	2.33184	2.02429	1.79856	3.63018	1.91551	2.04082	2.3753			0.423077	0.170732	0.681818	0.148148	0.0619469	0.18	0.35	0.266667	0.0904977	0.125
		0.65	2.64338	1.89694	2.4909	2.15247	2.02429	2.15827	2.85498	1.33823	2.16086	1.90024			0.592593	0.473684	0.390244	0.617647	0.344828	0.148936	0.608696	0.476191	0.0689655	0.356589
		0.7	2.31296	2.54813	2.12684	1.79372	1.82186	2.15827	2.06088	1.04959	1.56062	1.66271			0.333333	0.0945946	0.368421	0.160606	0.296296	0.0614335	0.318182	0.0418848	0.164557	0.333333
		0.75	1.72292	1.64213	1.82027	1.25561	1.417	1.07914	1.79618	0.787195	2.28091	1.06888			0.152174	0.383333	0.363636	0.178571	0.238095	0.388889	0.476191	0.0657277	0.409091	0.0666667
		0.8	1.69932	1.41563	0.862234	1.70404	1.61943	1.43885	1.09662	0.655996	1.08043	1.54394			0.0588235	0.114754	0.72973	0.145833	0.35	0.0511364	0.3	0.375	0.389831	0.155556
		0.85	1.15648	0.736127	1.13048	1.52466	1.61943	1.43885	1.17224	0.446077	1.44058	0.712589			0.242424	0.55	0.314286	0.291667	0.0454546	0.122807	0.296296	0.821429	0.033195	0.0666667
		0.9	0.826056	0.764439	1.073	1.34529	1.21457	0.719425	1.07771	0.419837	0.720288	1.06888			0.209302	0.586956	0.145833	0.186047	0.5	0.454545	0.571429	0.0489796	0.586207	0.122807
		0.95	0.613642	0.736127	0.632305	1.25561	1.21457	1.25899	0.718472	0.314878	1.08043	1.06888			0.347826	0.12069	0.0892857	0.229167	0.28125	0.175	0.304348	0.135593	0.150685	0.044586
		1	0.778853	0.594564	0.996359	2.24215	2.02429	2.15827	0.86973	0.577276	2.64106	3.56295			0.179487	0.269231	0.241379	0.35	0.275362	0.888889	0.4	0.117647	0.409091	0.384615
															0.363636	0.714286	0.133333	0.140187	0.195122	1	0.205128	0.545455	0.148936	0.352941
															0.421053	0.174129	0.0420168	0.6	0.056	0.203704	0.127273	0.21875	0.134831	0.115385
															0.179487	0.13089	0.0359477	0.369565	0.457143	0.12931	0.85	0.204724	0.296296	0.416667
															0.625	0.104478	0.0381356	0.0873786	0.0673077	0.0481928	0.228571	0.0519481	0.355556	0.0457516
															0.2	0.428571	0.354839	0.826087	0.0416667	0.309278	0.145833	0.439252	0.75	0.0776699
															0.55	0.432432	0.259259	0.228571	0.0294985	0.37963	0.219512	0.0535117	1	0.125
															0.538462	0.189873	0.0467836	0.097561	0.243243	0.173077	0.233333	0.35	0.4	0.0382514
															0.16129	0.0251799	0.571429	0.175	0.15	0.106061	0.328358	0.291667	0.277778	0.121951
															0.333333	0.175	0.127753	0.0992366	0.322581	0.473684	0.361905	0.177778	0.625	0.289474
															0.944444	0.205882	0.434783	0.114754	0.551724	0.116667	0.142857	0.722222	0.525	0.0736842
															0.318182	0.0479042	0.0190736	0.236842	0.476191	0.0769231	0.223684	0.241379	0.35	0.227273
															0.163934	0.3125	0.25	0.165138	0.25	0.148936	0.235294	0.291667	0.25	0.104478
															0.149254	0.205882	0.354839	0.13924	0.415385	0.309091	0.0723982	0.0642202	0.170732	0.0743243
															0.0275591	0.277778	0.0492958	0.105263	0.0961538	0.483871	0.28	0.173203	0.0510204	0.0208333
															0.533333	0.189189	0.2	0.507937	0.118644	0.4	0.134831	0.21875	0.0784314	0.194444
															0.356164	0.195652	0.45	0.118644	0.44	0.380952	0.825	0.733333	0.0561798	0.318182
															0.18421	0.206897	0.0583333	0.127273	0.11	0.142857	0.416667	0.283951	0.393258	0.0846154
															0.0882353	0.234375	0.138889	0.4	0.0507246	0.234375	0.144144	0.101205	0.0603448	0.291667
															0.0454546	0.205882	0.0755556	0.478261	0.291667	0.181818	0.348485	0.2	0.139423	0.148936
															0.35	0.142012	0.0489511	0.175824	0.0555556	0.109589	0.375	0.0286533	0.166667	0.0273438
															0.346154	0.164557	0.913044	0.21875	0.0795455	0.233333	0.583333	0.275862	0.0745342	0.485714
															0.189516	0.233333	0.259259	0.216216	0.333333	0.37931	0.304348	0.0921053	0.521739	0.301205
															0.295455	0.177778	0.137255	0.119792	0.2	0.147959	0.170213	0.175	0.123077	0.454545
															0.0897436	0.0540541	0.206897	0.242424	0.349515	0.370968	0.54321	0.454545	0.244444	0.291667
															0.169231	0.307692	0.0614035	0.35	0.222222	0.108696	0.35	0.208955	0.060241	0.347826
															0.0405405	0.242424	0.177215	0.863636	0.21875	0.371429	0.652174	0.275862	0.0958904	0.102564
															0.0873016	0.380952	0.0933333	0.0933333	0.163934	0.954545	0.462963	0.53125	0.189189	0.357143
															0.171429	0.108911	0.16129	0.152542	0.0311111	0.268293	0.123288	0.111111	0.793103	0.259259
															0.52381	0.576923	0.18421	0.204082	0.0697674	0.181572	0.285714	0.0965909	0.120567	0.321429
															0.0813954	0.114754	0.0810811	0.222222	0.827586	0.338462	0.243243	0.213333	0.145631	0.0865385
															0.170213	0.255319	0.0514706	0.111111	0.028	0.1875	1	0.225	0.122807	0.631579
															0.242424	0.470588	0.16129	0.0419162	0.0277136	0.0502793	0.14	0.268571	0.0440252	0.619048
															0.32	0.101449	0.0410256	0.0673077	0.386667	0.24	0.222222	0.263158	0.0358974	0.140351
															0.733333	0.152174	0.246154	0.435897	0.32	0.169491	0.333333	0.619048	0.388889	0.2
															0.0283688	0.296296	0.404762	0.205128	0.0714286	0.962963	0.418182	0.0222841	0.217949	0.0740741
															0.56	0.127273	0.0418848	0.179487	0.0864198	0.147541	0.5	0.22093	0.0529412	0.179487
															0.0708662	0.121622	0.458333	0.163265	0.219512	0.0309598	0.0909091	0.162791	0.333333	0.0941176
															0.409091	0.186047	0.457143	0.18421	0.685185	0.608696	0.101449	0.149254	0.318182	0.428571
															0.375	0.641026	0.328125	0.127273	0.404762	0.28	0.149254	0.106061	0.257143	0.382353
															0.176647	0.555556	0.184466	0.409091	0.782609	0.160839	0.666667	0.0957854	0.780488	0.0278884
															0.0784314	0.345454	0.0493827	0.444444	0.368421	0.20339	0.0689655	0.177778	0.235294	0.115942
															0.472727	0.18421	0.027668	0.259259	0.159091	0.148148	0.55	0.0776119	0.0693069	1
															0.190083	0.35	0.245763	0.333333	0.765957	0.210526	0.176471	0.130435	0.136054	0.0379147
															0.304348	0.363636	0.132076	0.4	0.122581	0.138614	0.130081	0.165468	0.833333	0.0985916
															0.153846	0.233333	0.162791	0.473684	0.5	1	0.266667	0.416058	0.176471	0.384615
															0.0719178	0.36	0.174419	0.692308	0.027027	0.5	0.392523	0.116732	0.243056	0.304348
															0.212121	0.4375	0.285714	0.151515	0.973684	0.0432099	0.25	0.166667	0.283871	0.580645
															0.234043	0.5625	0.476191	0.072165	0.0636364	0.154639	0.287671	0.255556	0.0421836	0.333333
															0.18421	0.25	0.35	0.368421	0.205882	0.535714	0.283019	0.0607029	0.0568182	0.0630631
															0.0380435	0.0598291	0.512821	0.0338983	0.888889	0.0530303	0.0752688	0.0516432	0.10355	0.0985916
															0.258064	0.146667	0.0309734	0.0555556	1	0.129771	0.368421	0.191489	0.148936	0.131148
															0.32	0.0373832	0.0747663	0.269231	0.162791	0.123077	0.387097	0.0821918	0.388889	0.1
															0.588235	0.545455	0.868421	0.233333	0.0707071	0.4	0.333333	0.142857	0.384615	0.222222
															0.580645	0.204698	0.0318182	0.310345	0.123077	0.368421	0.327869	0.123711	0.7	0.0503597
															0.291667	0.028777	0.0891089	0.189189	0.2	0.309859	0.0813954	0.230769	0.657895	0.4
															0.142857	0.21875	0.296296	0.216216	0.194444	0.08	0.257143	0.0921053	0.0569395	0.059322
															0.11017	0.533333	0.15873	0.189189	0.101449	0.380952	0.116883	0.72	0.0330189	0.607143
															0.627451	0.219512	0.0509259	0.259259	0.105263	0.163265	0.318182	0.106952	1	0.458333
															0.378378	0.516667	0.5	0.137931	0.0943396	0.166667	0.571429	0.0961538	0.210526	0.102941
															0.363636	0.725	0.104651	0.36	0.233333	0.210526	0.04375	0.657143	0.177083	0.310345
															0.465909	0.0967742	0.0432692	0.388889	0.269231	0.958333	0.217949	0.5	0.21875	0.175
															0.291667	0.244565	0.0685714	0.388889	0.307692	0.214286	0.205882	0.0786026	0.45	0.127273
															0.0603448	0.327586	0.181818	0.551724	0.258064	0.08	0.833333	0.169231	0.111111	0.454545
															0.291667	0.0493827	0.0776699	0.212121	0.102941	0.172414	0.642857	0.04	0.227273	0.409091
															0.411765	0.131148	0.0707071	0.3125	0.222222	0.307692	0.311111	0.236842	0.2	0.0786517
															0.363636	0.0279503	0.0635838	0.355769	0.197531	0.233333	0.179487	0.534884	0.225806	0.0681818
															0.555556	0.55	0.714286	0.108108	0.112903	0.333333	0.333333	0.145833	0.243902	0.0875
															0.235294	0.269231	0.259259	0.264706	0.0957447	0.0592593	0.463415	0.159091	0.818182	0.178571
															0.761905	0.137931	0.0603448	0.5	0.0932643	0.0985916	0.134615	0.357143	0.195122	0.0740741
															0.129496	0.277778	0.118644	0.18421	0.686567	0.463768	0.0921053	0.52	0.222222	0.5
															0.583333	0.335878	0.241379	0.0967742	0.555556	0.590909	0.25641	0.107692	0.145454	0.269231
															0.259259	0.528571	0.0571429	0.73913	0.258333	0.0463576	0.521739	0.28	0.189873	0.44
															0.318182	0.340909	0.126667	0.468085	0.4625	0.0898876	0.310345	0.275862	0.247619	0.111111
															0.0752688	0.097561	0.222973	0.59375	0.38806	0.324324	0.483871	0.836735	0.0469799	0.636364
															0.342857	0.435484	0.225	0.128713	0.036036	0.103659	0.0752688	0.28125	0.0823529	0.189189
															0.363636	0.314763	0.0479452	0.5	0.266667	0.225352	0.310345	0.289474	0.288889	0.163265
															0.4375	0.471698	0.156863	0.0733945	0.209302	0.52381	0.2375	0.411765	0.277778	0.0299003
															0.204082	0.274194	0.339286	0.5	0.111888	0.0588235	0.413793	0.296296	0.12069	0.291667
															0.4375	0.302326	0.259259	0.839286	0.2	0.384615	0.318182	0.0374331	0.156863	0.318182
															0.264151	0.296296	0.057971	0.42029	0.181818	0.884615	0.512821	0.414634	0.454545	0.243243
															0.16	0.13253	0.0744681	0.0952381	0.0564516	0.538462	0.307692	0.368421	0.428571	0.102941
															0.388889	0.673469	0.059322	0.242424	0.2	0.235294	0.611111	0.0660377	0.159091	0.103896
															0.152174	0.103896	0.0769231	0.818182	0.122137	0.818182	0.722222	0.666667	0.0503597	0.391304
															0.333333	0.0985916	0.232759	0.0364372	0.125	0.0479452	0.142857	0.0404624	0.395833	0.107527
															0.304348	0.458333	0.205882	0.186047	0.237288	0.0714286	0.307692	0.179487	0.0909091	0.25
															0.204545	0.0391459	0.0673077	0.0873786	0.269231	0.96	0.571429	0.742857	0.142857	1
															0.142857	0.358974	0.782609	0.466667	0.1875	0.282051	0.108108	0.149701	0.32	0.588235
															0.320896	0.319261	0.153061	0.388889	0.344828	0.162791	0.233333	0.388889	0.543478	0.135417
															0.0505051	0.383178	0.160919	0.444444	0.228571	0.264706	0.736842	0.130769	0.615385	0.454545
															0.194915	0.30303	0.297872	0.681818	0.966667	0.146154	0.28125	0.714286	0.291667	0.18421
															0.142857	0.461539	0.102273	0.555556	0.411765	0.189189	0.484849	0.225	0.304348	0.0608696
															0.189655	0.333333	0.0853658	1	0.189189	0.0601093	0.321429	0.25	0.421053	0.103448
															0.0150215	0.0840336	0.112676	0.0848485	0.647059	0.678571	0.304348	0.220339	0.35	0.0875
															0.152174	0.130573	0.173333	0.363636	0.0295203	0.391304	0.212121	0.0472973	0.0551181	0.633333
															0.233533	0.344828	0.292683	0.356164	0.454545	1	0.304348	0.461539	0.318182	0.380952
															0.0899654	0.1	0.134615	0.428571	0.0804598	0.119403	0.125	0.119718	0.347826	0.048913
															0.235294	0.617647	0.166667	0.0452261	0.0479042	0.846154	0.375	0.131148	0.1	0.139785
															0.13388	0.212121	0.421053	0.121827	0.0684411	0.724138	0.4	0.0503597	0.14	0.15625
															0.5	0.141732	0.215385	0.313725	0.097561	0.102041	0.2	0.137615	0.106667	0.236842
															0.111111	0.384615	0.333333	0.2	0.108911	0.235294	0.156863	0.0666667	0.175439	0.52
															0.35	0.25	0.166667	0.132353	0.480769	0.186047	0.073913	0.533333	0.25	0.0249221
															0.181818	0.0666667	0.264151	0.145038	0.28169	0.695652	0.458333	0.220779	0.291667	0.241379
															0.769231	0.365079	0.2	0.132812	0.230189	0.84	0.227273	0.258064	0.521739	0.36
															0.117647	0.241379	0.035533	0.34127	0.16	0.0619469	0.122807	0.2	0.421053	0.4
															0.755102	0.150943	0.0606061	0.229167	0.31579	0.269231	0.2	0.314286	0.101449	0.14
															0.413793	0.0775862	0.428571	0.0660377	0.534884	0.681818	0.0909091	0.076087	0.314286	0.134831
															0.234234	0.652174	0.348837	0.163934	0.666667	0.114754	0.21875	0.172131	0.125	0.296296
															0.28125	0.0214067	0.8	0.2	0.818182	0.241379	0.291667	0.0909091	0.238095	0.272727
															0.390244	0.777778	0.25	0.368421	0.6	0.122807	0.538462	0.304348	0.9375	0.392857
															0.111888	0.391304	0.333333	0.1875	0.0307017	0.269231	0.555556	0.307692	0.454545	0.333333
															0.194444	0.175	0.0851064	0.103896	0.0330882	0.0792079	0.241379	0.226415	0.269231	0.222222
															0.388889	0.318182	0.447368	0.756757	0.11811	0.0891089	0.318182	0.150943	0.18421	0.382353
															0.142857	0.346154	0.0869565	0.136986	0.045614	0.2	0.210526	0.197802	0.818182	0.190476
															0.259259	0.266667	0.158416	0.12069	0.0275229	0.241379	0.0945946	0.404762	0.244186	0.236842
															0.18421	0.0706714	0.0592593	0.234375	0.0330189	0.07	0.1875	0.45	0.7	0.388889
															0.259259	0.368421	0.409091	0.53125	0.285714	0.628571	0.0864198	0.106061	0.275862	0.195122
															0.4	0.177215	0.467742	0.310345	0.204082	0.0578512	0.0864865	0.35	0.271186	0.35
															0.0875	1	0.333333	0.276596	0.138889	0.297297	0.2	0.355932	0.6	1
															0.290909	0.141593	0.0147368	0.363636	0.0700637	0.296296	0.101351	0.307692	0.75	0.291667
															0.0886076	0.25	0.0647482	0.439024	0.333333	0.106061	0.12069	0.4	0.116667	0.769231
															0.0786517	0.388889	0.0152505	0.259259	0.205128	0.205128	0.652174	0.581395	0.411765	0.25
															0.319149	0.150943	0.259259	0.0909091	0.413044	0.22	0.318182	0.269231	0.166667	0.0804598
															0.689655	0.0620155	0.230769	0.146067	0.21875	0.368421	0.152778	0.594595	0.363636	0.0636364
															0.368421	0.357143	0.0184211	0.194175	0.179612	0.0864198	0.156863	0.242424	0.14	0.0853658
															0.166667	0.0693642	0.0672269	0.651515	0.258373	0.0545455	0.428571	0.684211	0.454545	0.181818
															0.291667	0.0993378	0.433333	0.410256	0.0985916	0.170732	0.196429	0.48	0.25	0.451613
															0.0543933	0.132353	0.307692	0.418605	0.7	0.283784	0.150943	0.0948276	0.189189	0.305882
															0.155844	0.185792	0.172414	0.325	0.210526	0.4	0.25	0.12987	0.233333	0.304348
															0.269231	0.25	0.162791	1	1	1	0.517241	0.137255	0.275862	0.346154
															0.204545	0.241379	0.0720721	0.304348	0.241379	0.136364	0.967742	0.0340909	0.318182	0.06
															0.0560224	0.666667	0.4	0.241379	0.294118	0.318182	0.0864198	0.18421	0.255814	0.491525
															0.285714	0.242424	0.576923	0.272727	0.175	0.269231	0.275862	0.016	0.304348	0.0666667
															0.684211	0.127273	0.14	0.321429	0.421053	0.213115	0.288136	0.208122	0.28	0.3
															0.291667	0.235294	0.0985916	0.144927	0.296296	0.258064	0.333333	0.492754	0.363636	0.25
															0.402878	0.428571	0.0842105	1	0.25	0.35	0.258064	0.266667	0.111111	1
															0.230769	0.297297	0.65625	0.322581	0.147727	0.35	0.423077	0.022293	0.162791	0.112676
															0.541667	0.225806	0.380952	0.277778	0.257143	0.4	0.305556	0.0864198	0.172414	0.0492958
															0.311111	0.595745	0.062069	0.425	0.103896	0.235294	0.45	0.0411765	0.333333	0.195122
															0.111111	0.5	0.149533	0.794118	0.25	0.333333	0.55	0.578947	0.235294	0.191489
															0.333333	0.237288	0.266667	0.212121	0.444444	0.35	0.311828	0.233333	0.291667	0.238095
															0.52	0.0804598	0.0364583	0.397059	0.52	0.241379	0.575758	0.283688	0.318182	0.0826446
															0.35	0.102273	0.195876	0.644444	0.277778	0.132076	0.529412	0.478261	0.302326	0.12069
															0.162791	0.25641	0.151515	0.18421	0.103448	0.571429	0.814815	0.203297	0.416667	0.913044
															0.2125	0.104167	0.809524	0.148148	0.125	0.304348	0.611111	0.0727273	0.225806	0.0275591
															0.454545	0.0578512	0.695652	0.0913242	0.243902	0.35	0.0536913	0.222222	0.482759	0.454545
															0.409091	0.416667	0.16	0.0604027	0.290323	1	0.65	0.114943	0.430233	0.132076
															0.346154	0.740741	0.894737	0.0666667	0.101266	0.363636	0.2	0.149254	0.206897	0.0797546
															0.407407	0.532467	0.104651	0.52381	0.291667	0.78	0.333333	0.194444	0.1875	0.21875
															0.154762	0.034632	0.241379	0.477273	0.35	0.44	0.056	0.142857	0.769231	0.0927835
															0.368421	0.191667	0.62963	0.0426229	0.296296	0.210526	0.333333	0.0855615	0.5	0.134021
															0.109756	0.444444	0.152174	0.0572917	0.551724	0.368421	0.363636	0.152174	0.836364	0.25
															0.271966	0.234043	0.0252101	0.217391	0.411765	0.25	0.102941	0.269231	0.0694445	0.702128
															0.765957	0.363636	0.190476	0.25	0.35	0.263889	0.469388	0.0510949	0.571429	0.0597015
															0.7	0.118644	0.266667	0.608696	0.533333	0.368421	0.3125	0.75	0.545455	0.54902
															0.304348	0.057971	0.321429	0.409091	0.28125	0.237624	0.619048	0.243243	0.0583942	0.0729167
															0.168067	0.209876	0.421053	0.285714	0.96	0.529412	0.259259	0.169811	0.402985	0.112245
															0.241071	0.277108	0.318182	0.247191	0.590909	0.259259	0.5	0.0825688	0.428571	0.205128
															0.08	0.411765	0.166667	0.185185	0.174757	0.37037	0.138461	0.205882	0.863636	0.291667
															0.160714	0.65	0.0786517	0.0933333	0.428571	0.258621	0.390244	0.118644	0.974359	0.318182
															0.101449	0.0803571	0.356164	0.18421	0.290323	0.409091	0.55	0.194444	0.56	0.014433
															0.0526316	0.291667	0.894737	0.0319635	0.164062	0.254545	0.05	0.5	0.159091	0.104478
															0.321429	0.155844	0.145454	0.0763889	0.235294	1	0.129032	0.190476	0.32967	0.304348
															0.604167	0.5	0.233333	0.266667	0.291667	0.173913	0.576923	0.651163	0.0916667	0.350515
															0.0532544	0.0661157	0.240741	0.11413	0.678571	0.368421	0.285714	0.814815	0.111111	0.145454
															0.785714	0.155844	0.307692	0.220472	0.45	0.391304	0.0843374	0.0421053	0.134615	0.4
															0.2	0.107692	0.36	0.428571	0.642857	0.159091	0.767442	0.285714	0.391304	0.515151
															0.127273	0.494118	0.346154	0.138889	0.863636	0.789474	0.431034	0.360656	0.0149254	0.346939
															0.236842	0.35	0.104651	0.34375	0.333333	0.827586	0.285714	0.141667	0.304348	0.409091
															0.205128	0.145833	0.470588	0.266667	0.291667	0.10559	0.354839	0.216216	0.282051	0.78
															0.36	0.220339	0.212121	0.380952	0.5	0.109244	0.11236	0.434783	0.033264	0.533333
															0.0666667	0.476191	0.18421	0.173913	0.211268	0.275862	0.2	0.32	0.035	0.361111
															0.0846154	0.297297	0.128205	0.28169	0.485714	0.0826446	0.411765	0.129032	0.37037	0.0804598
															0.585938	0.264706	0.351351	0.357143	0.875	0.649123	0.304348	0.538462	0.25	0.608696
															0.114943	0.0677966	0.333333	0.165048	0.766667	0.271186	0.229167	0.470588	0.114458	0.133333
															0.333333	0.149254	0.645161	0.4	0.5	0.6	0.168317	0.0567376	0.708333	0.304348
															0.153061	0.25	0.418605	0.111111	0.611111	0.194444	0.740741	0.097561	0.531915	0.363636
															0.487179	0.242105	0.543478	0.4	0.285714	0.0625	0.291667	0.0731707	0.0352697	0.45
															0.228261	0.689655	0.144578	0.275862	0.241379	0.152174	0.434783	0.291667	0.392857	0.705882
															0.789474	0.311828	0.132076	0.708333	0.470588	0.269231	0.264706	0.0603448	0.173913	0.044898
															0.175	0.213675	0.318182	0.460674	1	0.11236	0.535714	0.159091	0.48	0.205128
															0.606383	0.333333	0.0457516	0.536842	0.0318182	0.148649	0.266667	0.565217	0.347826	0.52381
															0.117647	0.275862	0.0597826	0.366197	0.421875	0.0232558	0.512195	0.653846	0.833333	0.233333
															0.259259	0.166667	0.619048	0.326923	0.211268	0.0259067	0.157895	0.031746	0.134615	0.595238
															0.484849	0.155172	0.21875	0.169811	1	0.121622	0.2	0.0315315	0.36	0.205882
															0.259259	0.482759	0.37037	0.481482	1	0.038674	0.208333	0.131148	0.447368	0.833333
															0.642857	0.142857	0.272109	0.12963	0.21875	0.62069	0.18421	0.264706	0.153846	0.342857
															0.612903	0.571429	0.0634921	0.34375	0.269231	0.857143	0.292683	0.363636	0.135338	0.4
															0.196078	0.259259	0.031746	0.217391	0.271186	0.234234	0.4	0.375	0.147727	0.1125
															0.217391	0.212121	0.0418848	0.583333	0.27027	0.155963	0.64	0.259259	0.114583	0.030837
															0.358974	0.0897436	0.292683	0.888889	0.188679	0.10084	0.272727	0.155844	0.425532	0.285714
															0.320755	0.372093	0.216667	0.0849057	0.425532	0.11745	0.25	0.371795	1	0.0242214
															0.0555556	0.166667	0.310345	0.0299626	1	0.30303	0.25	0.590909	0.333333	0.45
															0.290323	0.122807	0.166667	0.211009	0.141844	0.117021	0.194444	0.132231	0.347826	0.154506
															0.0762712	0.107527	0.114286	0.060241	0.681818	0.0195531	0.454545	0.225	0.428571	0.321429
															0.363636	0.290323	0.380952	0.0769231	0.75	0.037415	0.291667	0.0704846	0.222222	0.0380435
															0.323529	0.222222	0.333333	0.04	0.3125	0.113475	0.156863	0.0538462	1	0.0476191
															0.318182	0.341463	0.0688073	0.12963	0.0545455	1	0.166667	0.636364	0.586956	0.0443038
															0.177273	0.32	0.380952	0.287129	0.216216	0.179775	0.195652	0.381818	0.189189	0.0686275
															0.363636	0.109375	0.225806	0.9	0.511628	0.0609756	0.194444	0.128342	0.05	0.25
															0.398305	0.25	0.108434	0.259259	0.213115	0.2	0.30303	0.115385	0.75	0.0470086
															0.285714	0.245614	0.52	0.101695	0.575758	0.466667	0.35	0.0538462	0.152174	0.0945946
															0.655172	0.868852	0.255	0.421053	0.212121	0.0402299	0.464286	0.25	0.76	0.192308
															0.0958904	0.179487	0.0606061	0.666667	0.391304	0.435065	0.259259	0.269231	0.316667	0.157303
															0.132076	0.169491	0.0660377	0.0759494	0.533333	0.0909091	0.0409639	0.368421	0.138298	0.586207
															0.413793	0.333333	0.148936	0.0421687	0.307692	0.4	0.208333	0.28	0.4	0.391304
															0.4	0.388889	0.363636	0.110294	0.0647482	0.0952381	0.186047	0.116279	0.444444	0.026616
															0.32	0.291667	0.380952	0.257143	0.112903	0.113821	0.141026	0.0782609	0.219512	0.0440529
															0.204545	0.2	0.275	0.166667	0.0358974	0.0776699	0.142857	0.103774	0.705882	0.114754
															0.0364583	0.534884	0.277778	0.07	0.565217	0.162791	0.135135	0.12	0.585366	0.521739
															0.393443	0.714286	0.225806	0.0769231	0.666667	0.183673	0.851852	0.151899	0.4	0.235294
															0.148936	0.5	0.039548	0.0492958	0.148649	0.62963	0.227848	0.160714	0.1625	0.958333
															0.118644	0.321429	0.319588	0.072	0.285714	0.323529	0.0651163	0.2	0.238095	0.54054
															0.588235	0.205882	0.5	0.208333	0.555556	0.304348	0.131148	0.148148	1	0.421053
															0.0397727	0.222222	0.111111	0.106061	0.482143	0.106918	0.166667	0.169811	0.0432099	0.266667
															0.101449	0.0760563	0.291667	0.122302	0.142857	0.0786517	0.241379	0.333333	0.347826	0.25
															0.285714	0.037037	0.0610687	0.129032	0.231343	0.558824	0.2	0.294118	0.040724	0.264706
															0.204545	0.0672515	0.107692	0.375	0.666667	0.0526316	0.653846	0.411765	0.302083	1
															0.37037	0.0864198	0.557692	0.318182	0.0448718	0.954545	0.2	0.65625	0.0987654	0.321429
															0.245614	0.633333	0.120301	0.166667	0.027451	0.681818	0.125	0.272727	0.241379	0.035533
															0.0679612	0.18254	0.583333	0.35	0.0431373	0.282353	0.377778	0.516129	0.148936	0.0707071
															0.137931	0.10084	0.275	0.181818	0.14	0.638889	0.285714	0.545455	0.181818	0.0878378
															0.185185	0.423645	0.128	0.4	0.333333	0.1	0.333333	0.140625	0.28	1
															0.175	0.191011	0.388889	0.162791	0.277778	0.148936	0.615385	0.0377359	0.333333	0.303571
															0.163636	0.904762	0.305556	0.761905	0.060241	0.65	0.533333	0.0634328	0.0673759	0.25
															0.425	0.0473934	0.225806	0.123077	0.107692	0.160428	0.380952	0.229508	0.391304	0.0813954
															0.144144	0.193452	0.347826	0.155172	0.55	0.793103	0.18	0.0178571	0.155556	0.188119
															0.123077	0.129187	0.15126	0.291667	0.173913	0.714286	0.219512	0.129032	0.697674	0.0948276
															0.440678	0.384615	0.25	0.211538	0.0736842	0.580645	0.594595	0.202703	0.170732	0.25
															0.169491	0.68	0.0701754	0.318182	0.162791	0.0588235	0.360656	0.0454546	0.318182	0.466667
															0.233333	0.488372	0.108108	0.096	0.2	1	0.225806	0.225225	0.0434783	0.666667
															0.101449	0.333333	0.191489	0.0867769	0.0625	0.285714	0.35	0.216216	0.33871	0.0406977
															0.166134	0.166667	0.269231	0.0869565	0.0752688	0.283582	0.5	0.117241	0.346154	0.175
															0.273809	0.4	0.0891089	0.611111	0.318182	0.35	0.223214	0.0180412	0.0957447	0.125
															0.109756	0.413044	0.14	0.0875	0.0792079	0.326087	0.0547945	0.114754	0.12069	0.714286
															0.137724	0.585034	0.285714	0.0439024	0.318182	0.241379	0.257143	0.0413223	0.148936	0.277778
															0.0569106	0.479339	0.529412	0.657143	0.0382775	0.18421	0.266667	0.30303	0.478261	0.289474
															0.106061	0.181818	0.566667	0.227273	0.0838323	0.333333	0.114754	0.333333	0.318182	0.0510949
															0.0864198	0.116279	0.162791	0.0677966	0.291667	0.52381	0.216216	0.106667	0.363636	0.733333
															0.21875	0.436364	0.102941	0.111732	0.909091	0.365854	0.194444	0.159292	0.0752688	0.1
															0.170732	0.516129	0.183333	0.132653	0.0327103	1	0.209302	0.226601	0.333333	0.21875
															0.181818	0.847826	0.5	0.125	0.476191	0.296296	0.318182	0.0875	0.111765	0.0343348
															0.102804	0.153846	0.407407	0.152174	0.233333	0.205882	0.333333	0.144279	0.125	0.916667
															0.0944444	0.196429	0.26	0.0735294	0.428571	0.21875	0.362069	0.02537	0.0921053	0.366667
															0.689655	0.670213	0.310345	0.318182	0.34	0.225806	0.0925926	0.0833333	0.0786517	0.0551181
															0.0409836	1	0.375	0.0693069	0.388889	0.269231	0.225	0.124031	0.324324	0.0679612
															0.216216	0.408333	0.666667	0.0842105	0.283582	0.14	0.516129	0.0522388	1	0.944444
															0.2	0.223881	0.380952	0.104478	0.0995851	0.175	0.366667	0.45614	0.291667	0.633333
															0.6	0.430556	0.9	0.0967742	0.333333	0.458333	0.233333	1	0.0744681	1
															0.318182	0.117021	0.4375	0.85	0.241379	0.470588	0.741935	0.262295	0.0897436	0.34375
															0.410256	0.296296	0.0230263	0.586956	0.0875	0.703704	0.122807	0.442308	0.56	0.416667
															0.137255	0.119403	0.153846	0.129032	0.8125	0.333333	0.137255	0.0725806	0.180851	0.0989011
															0.225806	0.0434783	0.55	0.0886076	0.255814	0.465116	0.630435	0.256131	0.75	0.636364
															0.0679612	0.119632	0.0283401	0.692308	0.35	0.153846	0.235294	0.433333	0.136986	0.205882
															0.0818713	0.177419	0.0538117	0.3	0.681818	0.896552	0.0947368	0.0542636	0.28	0.115942
															0.5	0.428571	0.04375	0.253968	0.176471	0.533333	0.306667	0.523256	0.28	0.291667
															0.102857	0.55	0.116667	0.155556	0.0945946	0.541667	0.177778	1	0.55	0.269231
															0.216216	0.07	0.0562249	0.27907	0.0486111	0.37037	0.577778	0.275862	0.127119	0.304348
															0.122807	0.586207	0.0740741	0.35	0.205128	0.25	0.5	0.0714286	0.321429	0.333333
															0.318182	0.235294	0.0547945	0.122807	0.233333	0.409091	0.145833	0.390698	0.9	0.150943
															0.291667	0.0432099	0.470588	0.0601504	0.0294118	0.863636	0.120332	0.174603	0.0987654	0.368421
															0.170213	0.0521739	0.368421	0.714286	0.0972222	0.0207101	0.666667	0.193799	0.180556	0.230769
															0.119403	0.470588	0.65625	0.576923	0.111111	0.446808	0.0520833	0.411765	0.243243	0.333333
															0.333333	0.351351	0.195122	0.227273	0.258064	0.318182	0.21875	0.317073	0.264706	0.615385
															0.363636	0.0714286	0.288136	0.0833333	0.113772	0.162791	0.27027	0.666667	0.0496894	0.571429
															0.117647	0.37013	0.590164	0.108108	0.0495495	0.387755	0.545455	0.293785	0.0269231	0.5
															0.318182	0.35	0.45098	0.339286	0.2	0.421053	0.2	0.0679612	0.380952	0.233333
															0.266667	0.0516432	0.863636	0.714286	0.782609	0.0676692	0.223022	0.487179	0.0643275	0.521739
															0.0909091	0.0786517	0.392523	0.528302	0.132743	0.219512	0.428571	0.225806	0.035533	0.21875
															0.678571	0.0864198	0.661017	0.101215	0.770833	0.118056	0.35	0.0266272	0.0290456	0.114286
															0.136986	0.8	0.114286	0.182796	0.421053	0.155172	0.333333	0.52381	0.0661157	0.134615
															0.142857	0.0656934	0.144578	0.189189	0.211538	0.186047	0.25	0.319149	0.0752688	0.125
															0.0496454	0.361111	0.0488506	0.206522	0.0631579	0.126984	0.429825	0.10989	0.0414747	0.342105
															0.288461	0.581081	0.0324074	0.75	0.510638	0.116667	0.225	0.0360825	0.170732	0.304348
															0.140351	0.157407	0.0673077	0.654545	0.0564516	0.574074	0.257143	0.4375	0.181818	0.3
															0.416667	0.100719	0.416667	0.0707071	0.269231	0.678571	0.636364	0.158879	0.297297	0.132353
															0.269231	0.205128	0.236842	0.0865385	0.0681818	1	0.0909091	0.5	0.407895	0.106061
															0.156716	0.150794	0.176991	0.0789474	0.72	0.0945946	0.371429	0.0685579	0.0264151	0.428571
															0.195652	0.0689655	0.339286	0.393939	0.0792079	0.37037	0.233333	0.2	0.415254	0.28
															0.275862	0.5	0.741935	0.40625	0.135135	0.365385	0.5	0.183099	0.1875	0.257143
															0.127273	0.418605	0.35	0.72	0.268293	0.580645	0.380952	0.225806	0.7	0.264706
															0.1875	0.232877	0.821429	0.175572	0.118644	0.291667	0.18421	0.0933333	0.112903	0.357143
															0.18421	0.552632	0.6	0.409091	0.37037	0.236842	0.0853658	0.597222	0.137255	0.54054
															0.170732	0.333333	0.045977	0.606061	0.274194	0.243243	0.0346535	0.0869565	0.186047	0.636364
															0.363636	0.232558	0.195122	0.3125	0.175	0.636364	1	0.134259	0.201389	0.197674
															0.485714	0.218341	0.123077	0.102941	0.789474	0.118644	0.248	0.15	0.0769231	0.8
															0.32	0.302198	0.625	0.131868	0.1375	0.470588	0.194444	0.0564516	1	0.146667
															0.45	0.416667	0.0661157	1	0.09	0.258064	0.160714	0.0685358	0.75	0.555556
															0.223881	0.782609	0.0930233	0.285714	0.114754	0.5	0.25	0.25	0.0397727	0.5
															0.0891089	0.421875	0.761905	0.107383	0.0440529	0.178571	0.186047	0.107895	0.595745	0.735294
															0.576923	0.228571	0.466667	0.144927	0.0414201	0.4375	0.386364	0.782609	0.590909	0.428571
															0.306452	0.154206	0.185185	0.466667	0.351064	0.176471	0.310345	0.15493	0.106061	0.736842
															0.0985916	0.186047	0.703704	0.175258	0.259259	0.318182	0.56	0.021164	0.152174	0.409091
															0.188679	0.190476	0.0769231	0.454545	0.257143	0.27027	0.28	0.230769	0.0823529	0.0546875
															0.0777778	0.291892	0.4	0.230769	0.837209	0.318182	0.290323	0.111111	0.259259	0.0806452
															0.114943	0.289474	0.652174	0.68	0.307692	0.241379	0.545455	0.0445682	0.5	0.0215827
															0.220588	0.576923	0.52	0.625	0.0967742	0.384615	0.291667	0.0346154	0.117647	0.0843374
															0.222222	0.540984	0.144876	0.8	0.310345	0.421053	0.434783	0.604651	0.257143	0.0330882
															0.21875	0.33945	0.0813008	1	0.0824742	0.220588	0.222222	0.37037	0.409091	0.52381
															0.204545	0.0625	0.428571	0.18254	0.301205	0.269231	0.194444	0.0629921	0.318182	0.144737
															0.205128	0.0875912	0.342105	0.0660377	0.0533333	0.259259	0.0985916	0.0285714	0.0829875	0.336956
															0.351351	0.330769	0.10101	0.933333	0.0866142	0.551724	0.25	0.304348	0.0441989	0.181818
															0.375	0.363636	0.310345	0.357143	0.344828	0.466667	0.266667	0.0343137	0.145454	0.153846
															0.178571	0.0555556	0.782609	0.622222	0.421053	0.0294985	0.46875	0.0564516	0.647059	0.24
															0.4	0.160714	0.0371747	0.303571	0.101852	0.583333	0.205128	0.192771	0.189189	0.225806
															0.59375	0.20339	0.115385	0.714286	0.421053	0.269231	0.444444	0.375	0.486486	0.0484849
															0.290323	0.491803	0.296296	0.190141	0.12963	0.388889	0.278481	0.170732	0.0958084	0.133333
															0.296296	0.0733945	0.2	0.4	0.266667	0.264706	0.486111	0.410256	0.0505618	0.212121
															0.421053	0.0526316	0.272727	0.482759	0.179487	0.196078	0.3	0.347826	0.28	0.271605
															0.0710059	0.34375	0.241379	0.113924	0.965517	1	0.409091	0.346154	0.138889	0.35
															0.424242	1	0.0921053	0.0630252	0.255814	0.162791	0.428571	0.335	0.0695652	0.0991379
															0.756757	0.217054	0.194444	0.0813954	0.0864198	0.162791	0.244898	0.307692	0.423077	0.0379147
															0.2	0.153846	0.772727	0.7	0.578947	0.258064	0.517241	0.173077	0.226804	0.2
															0.383117	0.188235	0.0757576	0.186992	0.0985916	0.246753	0.28	0.0230263	0.147368	0.0691824
															0.514286	0.368421	0.704545	0.5	0.869565	0.526316	0.0636364	0.218884	0.314286	0.0884956
															0.135593	0.184783	0.0886076	0.0738916	0.114754	0.18421	0.536585	0.106667	0.0754717	0.304348
															0.164179	0.0777778	0.0533333	0.0747663	0.12069	0.45	0.275862	0.28	0.269231	0.607143
															0.0417827	0.454545	0.476191	0.539474	0.0382514	0.27027	0.211538	0.140845	0.8	0.353658
															0.0252708	0.383333	0.259259	0.410714	0.793103	0.220339	0.342105	0.194444	0.285714	0.2125
															0.952381	0.45946	0.35	0.160714	0.916667	0.454545	0.243243	0.209302	0.346154	0.277778
															0.0833333	0.2	0.148515	0.223077	0.122066	0.318182	0.666667	0.0603448	0.291667	0.137931
															0.0860927	0.0729167	0.132743	0.521739	0.0151188	0.45	0.0309734	0.195122	0.473684	0.216216
															0.0326087	0.310345	0.129032	0.161074	0.575	0.368421	0.419355	0.0246479	0.266667	0.076087
															0.0619469	0.544304	0.0314685	0.105882	0.0761905	0.304348	0.128713	0.0509554	0.075	0.147541
															0.65625	0.480769	0.119318	0.560976	0.12069	0.391304	0.309091	0.210744	0.85	0.0333333
															0.264706	0.730159	0.0337838	0.135593	0.121076	0.264706	0.163265	0.55	0.258064	0.181818
															0.0985916	0.424242	0.418605	0.144186	0.0756303	0.304348	0.205882	0.0641711	0.245283	0.0873016
															0.272727	0.12069	0.709677	0.0909091	0.409091	0.189189	0.283333	0.488889	0.205882	0.5
															0.32	0.4	0.09375	0.956522	0.156863	0.189189	0.111111	0.264151	0.333333	1
															0.679012	0.431373	0.423077	0.0672269	0.159091	0.75	0.333333	0.512821	0.09375	0.333333
															0.2	0.354167	0.316667	0.235294	0.142857	0.651515	0.101266	0.123288	0.0555556	0.758621
															0.161677	0.342105	0.416667	0.192983	0.333333	0.857143	0.2	0.1	0.114754	0.0816327
															0.511111	0.162791	0.571429	0.923077	0.0526316	0.291667	0.117117	0.218487	0.333333	0.0507246
															0.483871	0.692308	0.113924	0.571429	0.03	0.333333	0.162791	0.333333	0.296296	0.272727
															0.518518	0.868421	0.574468	0.0585106	0.0224359	0.307692	0.0485437	0.107692	0.0252366	0.18
															0.195122	0.285714	0.106667	0.205882	0.28125	0.647059	0.333333	0.509434	0.0973154	0.0394737
															0.628571	0.869565	0.434783	0.43662	0.186047	0.571429	0.3	0.0660377	0.413793	0.225
															0.328125	0.35	0.115942	0.508772	0.666667	0.258064	0.18421	0.316901	1	0.04375
															0.888889	0.4375	0.0677291	0.28	0.0630631	0.333333	0.28	0.473684	1	0.0985916
															0.148289	0.543478	0.205128	0.482759	0.173913	0.204545	0.535211	0.153846	0.179487	0.25
															0.0807692	0.107692	0.15	0.0507246	0.6	0.428571	0.576923	0.151659	0.444444	0.428571
															0.0328639	0.217687	0.414634	0.375	0.333333	0.517241	0.133333	0.145833	0.473684	0.0913242
															0.45	0.65	0.884615	0.431818	0.266667	0.4375	0.12069	1	0.44186	0.0290456
															0.388889	0.20362	0.0666667	0.03125	0.107692	0.0555556	0.0674603	0.108808	0.34375	0.470588
															0.263158	0.758621	0.333333	0.0634921	0.45	0.135593	0.476191	0.282258	0.186047	0.10084
															0.354839	0.0685484	0.219512	0.273381	0.137931	0.363636	0.259259	0.0609756	0.884615	0.428571
															0.0660377	0.529915	0.225	0.269231	0.134615	0.32	0.596774	0.113924	0.22807	0.307692
															0.0333333	0.0625	0.045045	0.324074	0.222222	0.205128	0.377778	0.533333	0.555556	0.202899
															0.125	0.28125	1	1	0.4	0.318182	0.666667	0.0930233	0.243243	0.2
															0.313131	0.255814	0.0550459	0.642857	0.130081	0.4375	0.314815	0.153846	0.363636	0.375
															0.333333	0.15942	0.0336538	0.0763889	0.0205882	0.208333	0.411765	0.172619	0.945946	0.290323
															0.391667	0.5	0.311688	0.0824742	0.59375	0.290323	0.727273	0.0479042	0.833333	0.0547945
															0.3125	0.0592593	0.0886076	0.263158	1	0.205882	0.25	0.0542169	0.214286	0.291667
															0.61	0.258064	0.0382775	1	0.255319	0.212121	0.0864198	0.0851064	0.101695	0.0347826
															0.129032	0.145907	0.225	0.425532	0.170732	0.333333	0.357143	0.381579	0.741935	0.290323
															0.363636	0.209302	0.625	0.292683	0.0622407	0.428571	0.291667	0.414634	0.325581	0.333333
															0.0421053	0.425	0.552632	0.0421053	1	0.137255	0.368421	0.0510949	0.183908	0.380952
															0.4	0.302326	0.2	0.425532	0.585526	0.46875	0.318182	0.517241	0.203125	0.0826446
															0.12069	0.151079	0.16	0.135417	0.141643	0.3125	0.296296	0.12069	0.189189	0.538462
															0.0938628	0.25	0.390244	0.78125	0.909091	0.272727	0.4	0.333333	0.173077	0.292683
															0.0642202	0.106482	0.21875	0.104839	0.0338983	0.341463	0.571429	0.194444	1	0.55
															0.545455	0.313187	0.612903	0.935484	0.321429	0.304348	0.583333	0.48	0.0958904	0.0290456
															0.128	0.456522	0.0597015	0.12	0.333333	0.241379	0.4375	0.232877	0.363636	0.127168
															0.152174	0.0941176	0.227545	1	0.289474	0.681818	0.151899	0.296296	0.5	0.218182
															0.958333	0.3	0.175	0.3125	0.645161	0.217391	0.186047	0.282051	0.0990566	0.296296
															0.56	0.0923077	0.5	0.484849	0.231884	0.214286	0.1	0.106667	0.344828	0.148649
															0.363636	0.333333	0.533333	0.12069	0.193878	0.222222	0.25	0.136986	0.65625	0.213592
															0.363636	0.173913	0.0958904	0.0789474	0.2	0.36	0.473684	0.333333	1	0.0707965
															0.578947	0.0773481	0.216216	0.155738	0.241379	0.241379	0.448276	0.97561	0.84	0.03125
															0.678571	0.264706	0.235294	0.2	0.0404624	0.36	0.155556	0.326923	0.892308	0.258064
															0.285714	0.684211	0.296296	0.357895	0.212121	0.75	0.294118	0.173913	0.6	0.258064
															0.637931	0.241379	0.0614035	0.882353	0.318182	0.470588	0.652174	0.294118	0.5	0.168317
															0.038674	0.340102	0.62	0.814286	0.428571	0.566038	0.392157	0.5	0.727273	0.448276
															0.157895	0.11326	0.416667	0.125	0.606061	0.225806	0.307692	0.642857	0.0673077	0.136752
															0.538462	0.83871	0.127273	0.0727273	0.321429	0.0440252	0.111111	0.307692	0.0518518	0.166667
															0.357143	0.243243	0.7125	0.333333	0.142857	0.5	0.368421	0.112676	0.242424	0.409091
															0.675676	0.382979	0.833333	0.44186	0.553571	0.25	0.188235	0.021021	0.0757576	0.291667
															0.490196	0.0674847	0.368421	0.954545	0.104478	0.232558	0.072165	0.183824	0.233333	0.368421
															0.212121	0.259259	0.318182	0.241379	0.380952	0.736842	0.28	0.131148	0.644068	0.25
															0.0682731	0.318182	0.25641	0.208333	0.259259	0.586207	0.269231	0.123494	0.757576	0.677419
															0.0833333	0.25	0.303797	0.344828	0.423077	0.333333	0.444444	0.64	0.142857	0.285714
															0.131148	0.296296	0.112676	0.625	0.162791	0.306123	0.633333	0.0733696	0.120301	0.173913
															0.653061	0.166667	0.468085	0.381818	0.185567	0.441177	0.18421	0.2103	0.148936	0.1
															0.185185	0.350318	0.121212	0.207547	0.846154	0.130435	0.137931	0.0888889	0.84	0.933333
															0.419355	0.0921053	0.301887	0.777778	0.647059	0.0657277	0.323529	0.138614	0.5	0.882353
															0.305556	0.186047	0.137255	0.37037	0.83871	0.0695187	0.533333	0.277778	0.380952	0.821429
															0.571429	0.136364	0.183673	0.189189	0.175439	0.444444	0.155556	0.0865385	0.456522	0.5
															0.363636	0.276596	0.296296	0.583333	0.409091	0.410256	0.195652	0.390244	0.2	0.68
															0.192983	0.177778	0.261905	0.0985916	0.347826	0.567568	0.5	0.341463	0.368421	0.545455
															0.132812	0.0810811	0.358974	0.278481	0.25	0.257143	0.0476191	0.445454	0.310345	0.16
															0.126761	0.12766	0.333333	0.423077	0.44186	0.258064	0.333333	0.181818	0.216216	0.555556
															0.235294	0.431373	1	0.283019	0.0388889	0.333333	0.0714286	0.262136	1	1
															0.0808081	0.205882	0.0310881	0.282051	0.0818713	0.304348	0.248276	0.111111	0.346154	0.875
															0.196429	0.134615	0.0623742	0.0847458	0.464286	0.536585	0.112903	0.126437	0.35	0.191617
															0.657143	0.277778	0.13924	0.2	0.818182	0.333333	0.35	0.0727273	0.0451613	0.212121
															0.419355	0.589744	0.333333	0.0803571	0.363636	0.487805	0.35	0.304348	0.0852713	0.701754
															0.247059	0.192771	0.269231	0.305556	0.473684	0.363636	0.0763359	0.0724638	0.441177	0.138461
															0.123288	0.0463918	0.431818	0.5	0.230769	0.322581	0.176471	0.250896	0.116071	0.173913
															0.231884	0.285714	0.470588	0.342857	0.127273	0.828571	0.152174	0.312925	0.414894	0.0334728
															0.217143	0.057971	0.707317	0.424242	0.83871	0.45	0.388889	0.244898	0.145161	0.275862
															0.380952	0.35	0.0684932	0.277778	0.107692	0.142857	0.132076	0.0513513	0.68	0.275862
															0.411111	0.253731	0.319444	0.197802	0.190476	0.205882	0.317308	0.529412	0.981132	0.35
															0.4	0.12	0.227273	0.129032	0.177778	0.21875	0.147651	0.2	0.0769231	0.21875
															0.787879	0.214286	0.184783	0.0821918	1	0.791667	0.275	0.225	0.210526	0.108434
															0.0795455	0.954545	0.171053	0.4	0.12963	0.388889	0.333333	0.362319	0.310345	0.115385
															0.344262	0.0992366	0.409091	0.0679612	0.138461	0.4	0.156863	0.119718	0.196078	0.177515
															0.755102	0.491329	0.761905	1	0.072165	0.6875	0.181818	0.447368	0.0990099	0.476191
															0.434783	0.346154	0.259259	0.956522	0.257143	0.4375	0.612903	0.214286	0.12766	0.526316
															0.0472973	0.121212	0.285714	0.235294	0.171598	0.390244	0.186047	0.243243	0.0869565	0.302326
															0.197368	0.333333	0.454545	0.102564	0.218182	0.163265	0.0700637	0.378378	0.291667	1
															0.0869565	0.235294	0.035461	0.319149	0.242424	0.304348	0.238095	0.191489	0.217391	0.857143
															0.820896	0.432432	0.111111	0.0661765	0.0945946	0.285714	0.19	0.076087	0.291667	0.241379
															0.151515	0.32	0.345238	0.075	0.489933	0.444444	0.097561	0.0731707	0.218182	0.057971
															0.114428	0.22807	0.21875	0.466667	0.666667	0.375	0.473684	0.175	0.333333	0.458333
															0.148148	0.268293	0.278351	0.132404	0.101266	0.785714	0.452381	0.139535	0.457143	0.129032
															0.217949	0.173554	0.142857	0.307692	0.45	0.28	0.233333	0.0538462	0.666667	0.0782609
															0.947368	0.320312	0.864865	0.809524	0.388889	0.45	0.25	0.0264151	0.225806	0.625
															0.681818	0.259259	0.358209	0.4	0.03125	0.0298507	0.32	0.07	0.647059	0.179487
															0.611111	0.230769	0.210526	0.384615	0.612245	0.608696	0.109589	0.391304	0.235294	0.121495
															0.257143	0.368421	0.555556	0.164179	0.05625	0.18421	0.349206	0.217742	0.259259	0.27907
															0.337349	0.0782609	0.444444	0.290323	0.875	0.818182	0.32	0.28125	0.714286	0.197368
															0.0847458	0.0769231	0.128571	0.96	0.107438	0.666667	0.695652	0.0880196	0.615385	0.526316
															0.139785	0.142857	0.0653595	0.69697	0.1	0.384615	0.376344	0.0941176	0.6	0.5
															0.248619	0.307692	0.0268199	0.1	0.684211	0.12931	0.5	0.183206	0.0343348	0.428571
															0.574074	0.636364	0.625	0.533333	0.24918	0.375	0.268293	0.461539	0.0674157	0.127517
															0.0712251	0.454545	0.701754	0.269231	0.35	0.0695187	0.291667	0.112903	0.28	0.0696202
															0.034384	0.454545	0.2	0.123595	0.0262172	0.16	0.333333	0.333333	0.162791	0.807692
															0.259259	0.696429	0.64	0.238095	0.269231	0.4375	0.631579	0.0346535	0.193548	0.258621
															0.230769	0.4	0.347826	0.381818	0.0642202	0.2	0.35	0.415929	0.109589	0.0761905
															0.4	0.714286	0.868852	0.470588	0.0615385	0.333333	0.105263	0.199074	0.121795	0.166667
															0.0725806	0.625	0.148148	0.229167	0.037037	0.517241	0.368421	0.333333	0.225806	0.333333
															0.628571	0.242424	0.0431373	0.0752688	0.942857	0.32	0.409091	0.101449	0.0655022	0.0867347
															0.357143	0.0853658	0.923077	0.6	0.0909091	0.441177	0.482759	0.25	0.212121	0.195652
															0.0730159	0.954545	0.472222	0.368421	0.244898	0.375	0.25	0.112903	0.318182	0.21875
															0.615385	0.455696	0.137681	0.0744681	0.109589	0.287879	0.208333	0.0873786	0.3	0.4375
															0.128205	0.195455	0.0843374	0.432432	0.12963	0.8	0.346154	0.0679612	0.0933333	0.394737
															0.555556	0.234043	0.578947	0.535354	0.0769231	0.122807	0.618182	0.0676157	0.0277778	0.333333
															0.707317	0.146259	0.350649	0.33871	0.487179	0.35	0.454545	0.2	0.0571429	0.235294
															0.466667	0.0839161	0.1625	0.0679612	0.259259	0.259259	0.469697	0.348485	0.625	0.833333
															0.464912	0.145161	0.0909091	0.85	0.0482759	0.375	0.116279	0.16	0.238095	0.152174
															0.365854	0.333333	0.0883534	0.473684	0.0673077	0.533333	0.0588235	0.126582	0.0833333	0.102941
															0.325843	0.108434	0.304348	0.454545	0.114754	0.123077	0.113208	0.7	0.4	0.269231
															0.0664557	0.106061	0.138889	0.28	0.666667	0.261682	0.05	0.0364583	0.148936	1
															0.179487	0.0521327	0.333333	0.577778	0.194444	0.243243	0.280702	0.521739	0.318182	0.12844
															0.784314	0.256098	0.358974	0.294118	0.28	0.245614	0.666667	0.307692	0.4375	1
															0.2	0.155556	0.666667	0.588235	0.0304183	0.107692	0.517241	0.0909091	0.164384	0.114754
															0.476191	0.288461	0.0329218	0.264706	0.0958904	0.243243	0.545455	0.636364	0.0985916	0.14
															0.22807	0.545455	0.4	0.333333	0.340909	0.434783	0.381818	0.28	0.0509259	0.0620155
															0.476191	0.368421	1	0.4375	0.296296	0.541667	0.357798	0.0317003	0.275862	0.134615
															0.355556	0.109375	0.555556	0.0886076	0.123457	0.646154	0.0729167	0.421875	0.231884	0.0311111
															0.218182	0.347826	0.4	0.534884	0.105882	0.517241	1	0.0679612	0.137755	0.5
															0.149425	0.804878	0.0552486	0.157025	0.0152174	0.18	0.0789474	0.169811	0.368421	0.304348
															0.150685	0.533333	0.181818	0.347826	0.12844	0.141509	0.228571	0.115854	0.0823529	0.271357
															0.222222	0.264706	0.119497	0.203008	0.55	0.0384615	0.251429	0.446808	0.147059	0.204545
															0.730769	0.471429	0.1875	0.37037	0.428571	0.121212	0.473684	0.387755	0.0976744	0.181818
															0.285714	0.484849	0.40625	0.121495	0.75	0.253086	0.155556	0.269231	0.740741	0.241379
															0.608696	0.2	0.237705	0.105727	0.470588	0.318182	0.894737	0.084375	0.0972222	0.342857
															0.276382	0.6	1	0.0666667	0.135135	0.357143	0.225806	0.373832	1	0.294118
															0.25	0.175258	0.255814	0.233083	0.761194	0.421053	0.695652	0.230769	0.156863	0.233333
															0.648649	0.481482	0.428571	0.167568	0.121212	0.740741	0.301205	0.173333	0.25	0.216216
															0.333333	0.498195	0.73913	0.0769231	0.766667	0.307692	0.423077	0.21875	0.35	0.714286
															0.382353	0.121622	0.194444	0.85	0.928571	0.438597	0.692308	0.377551	0.241379	0.1
															0.229508	0.715385	0.263158	0.138889	0.175	0.25	0.232558	0.420561	0.92	0.0424528
															0.122807	0.318182	0.122222	0.0642857	0.37037	0.291667	0.613333	0.114478	0.0847458	0.28
															0.23301	0.62963	0.73913	0.133333	0.138889	1	0.170213	0.538462	0.243243	0.173554
															0.596154	0.0655738	0.55	0.44898	0.166667	0.511905	0.833333	0.155172	0.114583	0.4
															0.424242	0.0444445	0.42	0.0957447	0.0612245	0.470588	0.2	0.254902	0.65	0.247312
															0.333333	0.15	0.291667	0.0625	0.0481013	0.5	0.488889	0.241379	0.169231	0.0828026
															0.289855	0.653061	0.372093	0.0888889	0.317073	0.257143	0.555556	0.476191	0.0853658	0.0945946
															0.277778	0.28169	0.118421	0.5	0.52381	0.103896	0.105263	0.121212	0.923077	0.764706
															0.159091	0.312102	0.333333	0.222222	0.206107	0.150538	0.346154	0.5	0.485714	0.615385
															0.245902	0.259259	0.526316	0.208333	0.473684	0.192308	0.241379	0.117977	0.171875	0.45
															0.0483871	0.333333	0.0597826	0.189655	0.833333	0.0656934	0.869565	0.392857	0.0569106	0.24359
															0.76	0.125	0.287356	0.891304	0.228814	0.741935	0.529412	0.188235	0.205128	0.0564516
															0.0650407	0.476191	0.0451613	0.613636		0.444444	1	0.882353	0.276596	0.159091
															0.197917	0.148571	0.0823529	0.259259		0.461539	0.0838323	0.809524	0.169811	0.269231
															0.769231	0.476923	0.517241	0.174419		0.157895	0.594595	0.05	0.191781	0.272727
															0.0984456	0.292035	0.388889	0.4		0.347826	0.352941	0.28125	0.244444	0.140625
															0.263158	0.695652	0.520833	0.0898876		0.169811	0.380952	0.269231	0.101266	0.21875
															0.666667	0.346154	0.363265	0.0366492		0.5	0.304348	0.0350195	0.0534351	0.3125
															0.37037	0.183333	0.296296	0.416667		0.5	0.577778	0.196429	0.0642857	0.703704
															0.438597	0.5	0.387097	1		0.12963	0.166667	0.219512	0.186047	0.818182
															0.222222	0.5	0.359649	0.325		0.4	0.137615	0.195652	0.234375	0.833333
															0.363636	0.666667	0.632653	0.0977444		0.954545	0.105058	0.247934	0.538462	0.475
															0.2	0.127148	0.333333	0.189189		0.35	0.590909	0.235294	0.273973	0.809524
															0.162791	0.189189	0.292308	0.433628		0.909091	0.291667	0.441177	0.44186	0.259259
															0.354839	0.333333	0.4	0.135802		0.14	0.171875	0.197248	0.0588235	0.636364
															0.875	0.152174	0.805556	0.65		0.636364	0.764706	0.338983	0.159091	0.173077
															0.470588	0.175	0.0588235	0.233333		0.205128	0.454545	0.341176	0.307692	0.8
															0.36036	0.37931	0.146552	0.166667		0.272727	0.141844	0.382979	0.655172	0.168421
															0.166667	0.25	0.46	0.19598		0.5	0.137931	0.4375	0.631579	0.223022
															0.0571429	0.25	0.173554	0.194444		0.228571	0.290323	0.0693069	0.869565	0.205128
															0.18421	0.219512	0.0804598	0.321429		0.7	0.301075	0.174757	0.132076	0.4
															0.142857	0.438775	0.75	0.191176		0.363636	0.132353	0.236842	0.33871	0.18239
															0.372263	0.477778	0.115385	0.457143		0.333333	0.45	0.12069	0.333333	0.243902
															0.297753	0.588235	0.127273	0.458333		0.588235	0.428571	0.293578	0.464286	0.941176
															0.239437	0.233645	0.465116	0.114754		0.28	0.4	0.277778	0.222222	0.212121
															0.112676	0.0978261	0.0392157	0.286585		0.344828	0.228155	0.0958904	0.0597015	0.0786026
															0.0551724	0.615385	0.588235	0.106061		0.352113	0.0571429	0.107692	0.12069	0.0311111
															0.476191	0.0885609	0.198198	0.0833333		0.0233333	0.555556	0.259259	0.205882	0.95
															0.415094	0.678571	0.25	0.018		0.174825	0.107692	0.238342	0.105882	0.275862
															0.78125	0.454545	0.07	0.0391061		0.164251	0.585366	0.304348	0.0559006	0.2
															0.168605	0.304348	0.652174	0.146342		0.0733945	0.145161	0.35	0.193878	0.186047
															0.0671141	0.454545	0.945946	0.409091		0.428571	0.28	0.225806	0.0769231	0.714286
															0.636364	0.258064	0.172932	0.0483461		0.117021	0.150943	0.131148	0.0892857	0.355932
															0.11875	0.347826	0.18421	0.367647		0.25	0.159091	0.115385	0.4	0.186047
															0.136364	0.30303	0.233333	0.2		0.269231	0.220588	0.163265	0.173077	0.36
															0.215054	0.145833	0.64	0.142857		0.684211	0.259542	0.097561	0.22619	0.578947
															0.6	0.212598	0.357143	0.227273		0.230769	0.434783	0.0641026	0.641509	0.208633
															0.609756	0.793103	0.318182	0.020202		0.269231	0.35	0.0679612	0.321429	0.21875
															0.136691	0.702703	0.52381	0.0987654		0.520833	0.537037	0.347826	0.928571	0.904762
															0.101449	0.212121	0.565574	0.211538		0.257143	0.0952381	0.357143	0.18	0.15625
															0.5	0.493507	0.25	0.0677966		0.411765	0.115385	0.333333	0.227273	0.347826
															0.347826	0.159341	0.54	0.0666667		0.0601504	0.363636	0.1	0.454545	0.392857
															0.0810811	0.40625	0.0580645	0.246575		0.148936	0.4	0.181818	0.516129	0.2
															0.4	0.510638	0.119403	0.209677		0.302326	0.338235	0.333333	1	0.842105
															0.352113	0.0687023	0.0673077	0.368421		0.827586	0.118644	0.136986	0.304348	0.368421
															0.113924	0.354167	0.296875	0.0321101		0.259259	0.375	0.0642202	0.428571	0.5
															0.28	0.414634	0.0496454	0.542373		0.344538	0.857143	0.155556	0.129909	0.357143
															0.307692	0.148936	0.363636	0.11579		0.183673	0.85	0.30303	0.642857	0.0983607
															0.233333	0.166667	0.3	0.150943		0.228571	0.135922	0.2625	0.73913	0.163265
															0.388889	0.461539	0.636364	0.76		0.3125	0.110092	0.08	0.453237	1
															0.269231	0.3125	0.444444	0.477273		0.225806	0.214286	0.0588235	0.342857	0.388889
															1	0.180328	0.518518	0.176471		0.016	0.55102	0.165138	1	0.818182
															0.565217	0.55	0.35	0.106061		0.0529801	0.0462428	0.428571	0.653846	0.0859107
															0.0503145	0.809524	0.545455	0.375		0.2	0.147541	0.454545	0.227273	0.391304
															0.0934579	0.28	0.44	0.515151		0.17757	0.606061	0.0909091	1	0.0945946
															0.173913	0.0506329	0.326531	0.354167		0.928571	0.192308	0.36	0.290323	0.388889
															0.611111	0.0642202	0.333333	0.642857		0.142857	0.0526316	0.235294	0.0402299	0.418182
															0.0842105	0.17	0.0724638	0.0679012		0.242424	0.290323	0.333333	0.772727	0.236842
															0.168067	0.131148	0.62069	0.0769231		0.0328467	0.109375	0.32	0.233333	0.229268
															0.333333	0.0985916	0.242424	0.0833333		0.0869565	0.203704	0.203704	0.162304	0.0144033
															0.126984	0.578947	0.0769231	0.95		0.291667	0.375	0.365854	0.4	0.260274
															0.373134	0.4	0.615385	0.5		0.333333	0.478261	0.504854	0.608696	0.160714
															0.37931	0.857143	0.376812	0.132353		0.0945946	0.294118	0.333333	0.0679612	0.318182
															0.305556	0.285714	0.421053	0.0731707		0.35	0.0352423	0.12963	0.269231	0.772727
															0.134615	0.0642202	0.179688	0.22449			0.0742358	0.104651	0.546667	0.0410256
															0.272727	0.0530303	0.55102	0.0459184			0.0987654	0.282353	0.315068	0.214286
															0.229508	0.363636	0.0534351	0.032345			0.375	0.111111	0.333333	0.137255
															0.0819672	0.338028	0.0769231	0.20339			0.40625	0.258064	0.833333	0.189189
															0.695652	0.482143	0.134884	0.148936			1	0.455882	0.20339	0.368421
															0.0614035	0.1	0.1875	0.363636			0.419355	0.134615	0.348837	0.037234
															0.0689655	0.0804598	0.0282258	0.263158			0.115385	0.296296	0.380952	0.144445
															0.245614	0.220339	0.352941	0.471429			0.318182	0.204082	0.27027	0.333333
															0.363636	0.392857	0.395833	0.444444			0.35	0.137931	0.304348	0.333333
															0.7	0.277778	0.232558	0.12069			0.269231	0.160714	0.368421	0.384615
															0.44186	0.178808	0.0614035	0.0486487			0.586207	0.216216	0.120192	0.177778
															0.196078	0.148936	0.727273	0.0950413			0.190476	0.16	0.564103	0.608696
															0.375	0.7	0.205128	0.119048			0.428571	0.92	0.0645161	0.28
															0.152174	0.301075	0.439024	0.133333			0.318182	0.166667	0.470588	0.470588
															0.222222	0.0882353	0.241379	0.220339			0.0534351	0.372093	0.148148	0.175
															0.222222	0.588235	0.275862	0.75			0.166667	0.210526	0.14	0.346154
															0.644231	0.197802	0.755556	1			0.0879121	0.352941	0.323529	0.962963
															0.216216	0.166667	0.086758	0.230769			0.242424	0.352941	0.155172	0.108108
															0.122222	0.216216	0.275	0.84			0.54717	0.304348	0.578947	0.269231
															0.368421	0.377358	0.77551	0.96			0.493671	0.259259	0.25	0.233333
															0.35	0.142857	0.0988372	0.36			0.35	0.28	0.0636364	0.444444
															0.434783	0.45	0.545455	0.235849			0.740741	0.368421	0.383333	0.21875
															0.121951	0.1	0.0825243	0.223464			0.166667	0.45	0.196078	0.571429
															0.589744	0.161017	0.116667	0.83871			0.0909091	0.105882	0.2	0.615385
															0.538462	0.491379	0.333333	0.0786517			0.478261	0.164474	0.155556	0.5
															0.282609	0.576923	0.466667	0.223214			0.0909091	0.0146751	0.15942	0.232877
															0.25	0.28125	0.571429	0.123457			0.304348	0.0410256	0.8	0.35
															0.157895	0.164384	0.6	0.923077			0.275862	0.27907	0.318182	0.444444
															0.233766	0.0989011	0.416667	0.204545			0.4	0.0888889	0.0833333	0.194444
															0.112676	0.5	0.175	0.361702			0.416667	0.40625	0.813953	0.428571
															0.307692	0.642857	0.153226	0.126761			0.269231	0.413613	0.196429	0.347826
															0.0945946	0.333333	0.0571429	0.642857			0.294118	0.755102	0.145161	0.25
															0.123288	0.722222	0.241379	0.441177			0.189189	0.237288	0.25	0.411765
															0.6	0.2	0.36	0.25			0.634615	0.365854	0.346667	0.368421
															0.208333	0.109589	0.393617	0.198473			0.181818	0.383178	0.203463	0.0744186
															0.25	0.333333	0.375	0.160305			0.384615	0.195531	0.269231	0.11194
															0.291667	0.164179	0.689655	0.233333			0.525	0.0441989	0.278689	0.0286885
															0.176471	0.5	0.405405	0.205128			0.424242	0.0683761	0.462687	0.0864198
															0.295082	0.162791	0.529412	0.5			0.142857	0.329192	0.32	0.2
															0.525424	0.205882	0.0535714	0.633333			0.4	0.28	0.072165	0.180851
															0.145833	0.32	0.391304	0.138461			0.681818	0.578947	0.333333	0.0744337
															0.615385	0.357143	0.123077	0.218391			0.59375	0.0526316	0.307692	0.35
															0.363636	0.446808	0.574468	0.182927			0.386667	0.0619469	0.194444	0.166667
															0.166667	0.307692	0.333333	0.121951			0.108434	0.0316205	0.144578	0.0318182
															0.230769	0.179487	0.428571	0.416667			0.0853658	0.0648649	0.44	0.414634
															0.555556	0.207792	0.0434783	0.212121			0.261539	0.1375	0.2	0.685714
															0.333333	0.140351	0.1	0.0576923			0.333333	0.127907	0.212121	0.318182
															0.236842	0.888889	0.34375	0.159091			0.119565	0.179104	0.118644	0.206522
															0.5	0.271845	0.45	0.138461			0.291667	0.212389	0.291667	0.333333
															0.36	0.141844	0.428571	0.0757576			0.337662	0.08	0.191176	0.2
															0.8	0.382812	0.0903226	1			0.715909	0.151786	0.4	0.0372093
															0.625	0.216216	0.0718954	0.44186			0.4	0.136364	0.194444	0.8
															0.434783	0.333333	0.0939597	0.0326087			0.25	0.0958904	0.12963	0.209876
															0.16129	0.212121	0.284672	0.135593			0.115942	0.571429	0.219512	0.0517799
															0.125	0.0804196	0.404762	0.10917			0.225806	0.155556	0.681818	0.583333
															0.122951	0.825397	0.333333	0.111111			0.242424	0.142857	0.0989011	0.0417755
															0.25	0.195652	0.575758	0.0948276			0.4375	0.347826	0.176471	0.636364
															0.35625	0.283582	0.315217	0.467533			0.375	0.103896	0.13253	1
															0.108911	0.39759	0.282609	0.28125			0.208333	0.354839	0.148936	1
															0.40625	0.32093	0.32	0.192771			0.0972222	0.143885	0.22	0.333333
															0.653061	0.027668	0.323077	0.0987654			0.346154	0.208333	0.4375	0.666667
															0.277419	0.097561	0.0963855	0.4			0.212121	0.217391	0.215909	1
															0.772727	0.117021	0.333333	0.3			0.809524	0.434783	0.304348	1
															0.5	0.243243	0.241379	0.0388889			0.35	0.346154	0.4	0.444444
															0.145454	0.179012	0.188976	0.12828			0.5	0.0233333	0.275862	1
															0.681818	0.148148	0.314815	0.254902			0.4	0.0970874	0.35	0.424242
															1	0.308	0.0636364	0.0250784			0.44	0.0251397	0.415385	0.868421
															0.464435	0.185185	0.280488	0.171429			0.230769	0.25	0.2	0.952381
															0.122807	0.0460526	0.232759	0.04			0.35	0.0909091	0.470588	1
															0.404255	0.32	0.4	0.196721			0.35	0.7	0.114754	1
															0.285714	0.513513	0.12963	1			0.245098	0.205714	0.235294	1
															0.5	0.157895	0.0862069	0.636364			0.0987654	0.367924	0.25	1
															0.382979	0.0295082	0.3125	0.705882			0.267606	0.123077	0.386364	1
															0.452381	0.17341	0.236364	0.153153			0.138211	0.139706	0.444444	1
															0.560976	0.325	0.296296	0.190476			0.266667	0.178571	0.62	1
															0.44186	0.0243902	0.447368	0.231579			0.354167	0.0573248	0.391304	1
															0.457447	0.404145	0.285714	0.0879121			0.204225	0.264706	1	1
															0.119565	0.160714	0.479167	0.163265			0.538462	0.473684	0.692308	1
															0.294118	0.057377	0.191489	0.0330189			0.952381	0.127273	0.354167	0.112
															0.278846	0.265625	0.444444	0.179245			0.758621	0.341772	0.252874	0.0707071
															0.277778	0.681818	0.266667	0.388889			0.275	0.159091	0.102941	0.197183
															0.486486	0.6	0.35	0.235294			0.15942	0.408451	0.226415	0.333333
															0.551724	0.31579	0.155172	0.117647			0.0985916	0.184549	0.434783	0.215686
															0.628571	0.491803	0.684211	0.228571			0.274194	0.337349	0.18421	0.171642
															0.853659	0.553191	0.395833	0.362745			0.333333	0.416667	0.4	0.333333
															0.27451	0.347826	0.0851064	0.454545			0.351351	0.5	0.333333	0.653846
															0.322835	0.178571	0.818182	1			0.483871	0.208	0.894737	0.102941
															0.354167	0.244094	0.666667	0.35			0.421053	0.269565	0.179104	0.116379
															0.221757	0.6	0.102941	0.28125			0.53125	0.057377	0.964912	0.076087
															0.388889	0.419608	0.0843374	0.0804598			0.7	0.851852	0.2	0.27027
															0.428571	0.58871	0.68254	0.0897436			0.163265	0.444444	0.395833	0.0720721
															0.0605263	0.5	0.244444	0.0476191			0.122807	0.06	0.75	0.03125
															0.434783	0.25	0.564103	0.466667			0.115385	0.179487	0.225	0.926829
															0.645833	0.345133	0.0864198	0.029661			0.615385	0.14	0.956522	0.189189
															0.118132	0.5	0.123077	0.291139			0.194444	0.307692	0.205128	0.204545
															0.6	0.655172	0.212121	0.958333			0.205882	0.324561	0.6	0.121622
															0.0873239	0.268293	0.44	0.197183			0.677419	0.421053	0.954545	0.6
															0.0829694	0.862069	0.666667	0.0857143			0.28125	0.0692308	1	0.642857
															0.625	0.210526	0.65	0.6			0.333333	0.4625	0.170213	0.105263
															0.705882	0.296296	0.541667	0.5			0.414365	0.28	0.195122	0.358491
															0.241379	0.121212	0.322581	0.202703			0.46875	0.12987	0.141177	0.266667
															0.157895	0.364865	0.391304	0.407407			0.617647	0.150538	0.35	1
															0.235294	0.346154	0.135593	1			0.741935	0.5	0.793103	0.5
															0.123711	0.4	0.387097	0.347826			0.529412	0.0470588	0.0842105	0.9
															0.495327	0.4	0.225806	0.422222			0.115942	0.286765	0.218182	0.104046
															0.870968	0.233333	0.297872	0.0569476			0.6	0.2	0.634146	0.111607
															0.0452675	0.205128	0.195122	0.653846			0.177778	0.0947368	0.196078	0.0231788
															0.535714	0.171429	0.235294	0.0352113			0.321429	0.739726	0.96	0.25
															0.626866	0.236364	0.444444	1			0.154839	0.259259	0.205128	0.0902256
															0.253731	0.373874	0.227273	0.95			0.0608108	0.163265	0.241379	0.241379
															0.216346	0.744681	0.163265	0.391304			0.28169	0.0851064	0.619048	1
															0.3	0.564103	0.152174	0.283019			0.714286	0.152174	0.3	0.904762
															0.333333	0.454545	0.325	0.290323			0.666667	0.241379	0.0481928	0.733333
															0.218182	0.357143	0.21875	0.27907			0.368421	0.303571	0.318182	0.163265
															0.155844	0.0551724	0.551724	0.322917			0.210526	0.25	0.5	0.214286
															0.366667	0.444444	0.857143	0.0443038			0.25	0.307692	0.75	0.0555556
															0.232558	0.333333	0.259259	0.636364			0.188034	0.5	0.272727	0.0714286
															0.298969	0.277228	0.35	0.194444			0.0808081	0.0994475	0.179487	0.0601504
															0.512195	0.272727	0.476191	0.236364			0.333333	0.473684	0.152174	0.118812
															0.252918	0.412935	0.52381	0.275862			0.633333	0.434783	0.368421	0.115942
															0.340425	0.863636	0.0243902	0.177215			0.473684	0.12069	0.73913	0.875
															0.0788177	0.303797	0.21875	0.13253			0.486486	0.277419	0.159091	0.230769
															0.265306	0.134615	0.595238	0.204724			0.489796	0.0819672	0.174216	0.653846
															0.241379	0.241379	0.0196078	0.0325203			0.418605	0.269231	0.0154867	0.0140845
															0.634615	0.363636	0.2	0.142857			0.795918	0.162791	0.25641	0.027933
															0.0466667	0.08	0.233333	0.0530303			0.3	0.318182	0.303797	0.0451977
															0.574468	0.167939	0.529412	0.205882			0.684211	0.409091	0.2	0.346154
															0.692308	0.296296	0.170732	0.342857			0.44	0.141844	0.826087	0.0904523
															0.645161	0.539683	0.576642	0.159091			0.647887	0.0434783	0.25	0.0583333
															0.140625	0.535714	0.205128	0.368421			0.35	0.1375	0.5	0.0753769
															0.186441	0.888889	0.642857	0.52			0.241379	0.193277	0.608696	0.518518
															0.444444	0.210526	0.31579	0.305556			0.380952	0.1125	0.0985916	0.258621
															0.391667	0.790123	0.25	0.571429			0.07	0.44	0.231579	0.692308
															0.21875	0.396825	0.316547	0.242424			0.657143	0.0833333	0.318182	0.152174
															1	0.439024	0.247863	0.791667			0.592593	0.476191	0.189189	0.75
															0.704545	0.241379	0.189189	0.0978261			0.434783	0.291667	0.448276	0.518518
															0.7	0.507246	0.25641	0.0753425			0.28125	0.162791	0.028	0.30303
															0.597015	0.52	0.45679	0.2375			0.173913	0.0725806	0.404255	0.545455
															0.454545	0.247706	0.0451977	0.0625			0.25	0.318182	0.333333	0.0225352
															0.075	0.140187	0.425	0.321739			0.175	0.0683761	0.291667	0.217391
															0.284553	0.236842	0.382353	0.0803571			0.170213	0.169491	0.5	0.52381
															0.15	0.363636	0.0616438	0.411765			0.112903	0.866667	0.351351	0.108696
															0.272727	0.62963	0.241379	0.481482			0.210526	0.318182	0.28125	0.235294
															0.30303	0.0909091	0.2	0.1			0.428571	0.48	0.123762	0.189189
															0.441177	0.137931	0.545455	0.317073			0.0555556	0.0987654	0.135922	0.548387
															0.104167	0.647059	0.368421	0.197368			0.225	0.25	0.28	0.0507614
															0.35	0.162896	0.133333	0.304348			0.241379	0.391304	0.461539	0.153846
															0.119565	0.318182	0.689655	0.4375			0.294118	0.526316	0.269231	0.78
															0.166667	0.444444	0.323529	0.820513			0.303448	0.109375	0.7	0.612903
															0.0941176	0.252174	0.5	0.333333			0.338028	0.454545	0.0564516	0.121495
															0.242424	0.408759	0.333333	0.305556			0.257143	0.708333	0.333333	0.285714
															0.288136	0.230769	0.0232558	0.296296			0.536585	0.319149	0.304348	0.042328
															0.455696	0.425926	0.487805	0.545455			0.380952	0.368421	0.304348	0.0376344
															0.5	0.368421	0.684211	0.296296			0.622222	0.393939	0.0371747	0.0985916
															0.746479	0.255507	0.387097	0.318182			0.195876	0.388889	0.45098	0.241379
															0.457143	0.547368	0.0251799	0.0246154			0.205882	0.368421	0.116883	0.482759
															0.0985916	0.326087	0.72	0.277778			0.387097	0.32	0.142857	0.592593
															0.205882	0.323672	0.634783	0.163934			0.405405	0.391304	0.769231	0.388889
															0.641026	0.153846	0.473684	0.625			0.65625	0.45	0.84	0.212121
															0.173077	0.259259	0.125	0.285714			0.435897	0.666667	0.12069	0.0747663
															0.183673	0.428571	0.176471	0.159091			0.846154	0.0472973	0.117188	0.204545
															0.491803	0.304348	0.0786517	0.454545			0.0540541	0.0512821	0.118421	0.222222
															0.666667	0.28421	0.145833	0.139535			0.6	0.107527	0.18421	0.235294
															0.677419	0.360825	0.0216718	0.060241			1	0.137255	0.47541	0.476191
															0.73913	0.116883	0.203704	0.636364			0.7	0.107692	0.35	0.391304
															0.333333	0.120482	0.206522	0.177778			0.210526	0.2	0.225806	0.4
															0.708333	0.333333	0.574074	0.333333			0.434783	0.0610687	0.0934579	0.444444
															0.0559702	0.162162	0.519231	0.0928571			0.0729927	0.298246	0.0544554	0.518518
															0.304348	0.321429	0.0541516	0.147783			0.941176	0.0737705	0.363636	0.31579
															0.439024	0.117216	0.875	0.235294			0.150943	0.384615	0.806452	0.956522
															0.586207	0.383838	0.268293	0.421053			0.21875	0.25	0.106061	0.8
															0.32	0.238095	0.29	0.438597			0.321839	0.16129	0.0630631	0.28
															0.470588	0.127273	0.159091	0.565217			0.194444	0.189189	0.119718	0.0180723
															0.518518	0.18705	0.205882	0.55102			0.237624	0.109756	0.20339	0.0414201
															0.0380952	0.326531	0.481482	0.225806			0.212121	0.163636	0.129032	0.170732
															0.52381	0.241379	0.551724	0.171875			0.262295	0.304348	0.0657895	0.0827068
															0.113924	0.582524	0.541667	0.18			0.180328	0.304348	0.109589	0.163934
															0.0277778	0.264706	0.037234	0.25			0.16	0.0494506	0.277778	0.127907
															0.384615	0.586956	0.428571	0.243902			0.423729	0.574468	0.590909	0.18421
															0.423077	0.3	0.112245	0.321429			0.318182	0.323529	1	0.677419
															0.211538	0.38	0.3	0.274809			0.268657	0.101266	0.346154	0.821429
															0.0663507	0.315068	0.642857	0.571429			0.142857	0.176471	0.0520833	0.4
															0.765957	0.318182	0.413333	0.421053			0.142857	0.127907	0.0478469	0.428571
															0.38806	0.325843	0.692308	0.166667			0.40625	0.191489	0.111111	0.428571
															0.445946	0.21875	0.590909	0.140351			0.769231	0.35	0.234043	0.2
															0.807018	0.6	0.132076	0.225806			0.194444	0.194444	0.133333	0.233333
															0.189189	0.388889	0.884615	0.0853658			0.37931	0.227273	0.108434	0.714286
															0.283019	0.575342	0.333333	0.074			0.473684	0.026178	0.233333	0.259259
															0.0777778	0.741177	0.21875	0.127193			0.1875	0.25	0.363636	0.195122
															0.153153	0.232558	0.767857	0.0426966			0.121622	0.266667	0.0391459	0.147059
															0.452381	0.218182	0.157895	0.389831			0.269231	0.108108	0.45283	0.363636
															0.318182	0.291667	1	0.695652			0.458333	0.333333	0.159091	0.545455
															0.259259	0.305556	0.393939	0.0824742			0.0945946	0.366667	0.205882	0.175
															0.48	0.366907	0.263736	0.219512			0.0263158	0.117647	0.5	0.555556
															0.368421	0.220588	0.166667	0.71875			0.166667	0.163636	0.183673	0.318182
															1	0.0985916	0.270531	0.304348			0.652174	0.25	0.376812	0.318182
															0.642857	0.682927	0.478261	0.896552			0.366667	0.25	0.321429	0.5
															0.064	0.0869565	0.304348	1			0.328947	0.365854	0.44186	0.307692
															0.435897	0.126214	0.304348	0.54054			0.25641	0.212121	0.717949	0.0869565
															0.134146	0.516667	0.337349	0.254237			0.189189	0.108108	0.564516	0.0473373
															0.194805	0.330769	0.36	0.766667			0.75	0.0353982	0.0432099	0.318182
															0.375	0.4	0.592593	0.344828			0.222222	0.0886076	0.0482759	0.170213
															0.357143	0.571429	0.137931	0.457627			1	0.291667	0.0286738	0.476191
															0.0952381	0.384615	0.333333	0.75			0.388889	0.6	1	0.571429
															0.101911	0.214286	0.74359	0.827586			0.523256	0.333333	0.117647	0.175
															0.104396	0.0818182	0.428571	0.761905			0.363636	0.0482759	0.194444	0.417582
															0.395062	0.438597	0.28	1			0.318182	0.155844	0.173077	0.651163
															0.189189	0.555556	0.421053	0.842105			0.275	0.233871	0.118881	0.6
															0.0523256	0.197279	0.170213	0.285714			0.818182	0.421053	1	0.269231
															0.757576	0.490909	1	0.270677			0.0697674	0.0666667	0.0583333	0.418605
															0.131868	0.393939	0.678571	0.0733945			0.347826	0.275862	0.0241692	0.368421
															0.165714	0.140351	0.212121	0.9			0.346154	0.235294	0.111111	0.0989011
															0.426229	0.232558	0.4	0.36527			0.333333	0.423077	0.222222	0.0595238
															0.37931	0.23301	0.4	0.595745			0.375	0.384615	0.0410256	0.0366492
															0.1133	0.305263	0.109589	0.380952			0.40678	0.577465	0.11236	0.0409357
															0.611111	0.2	0.183333	0.369231			0.333333	0.112903	0.449275	0.363636
															0.272727	0.30303	0.307692	0.52			0.533333	0.0892857	0.27451	0.0941176
															0.275862	0.369565	0.272727	0.22449			0.466667	0.175439	0.242424	0.545455
															0.421053	0.345324	0.275862	0.266667			0.318182	0.32	0.230769	0.388889
															0.162791	0.21875	0.413044	0.512821			0.603448	0.108696	0.333333	0.025463
															0.220779	0.289855	0.409091	0.195122			0.296296	0.244275	0.388889	0.097561
															0.714286	0.645833	0.33121	0.767442			0.241379	0.2	0.368421	0.118644
															0.427083	0.283333	0.177778	0.259259			0.947368	0.163842	0.241379	0.132653
															0.4	0.259259	0.304348	0.9			0.608696	0.140496	0.391304	0.318182
															0.132867	0.782353	0.0784314	0.0663717			0.0523256	0.145833	0.186047	0.5
															0.283951	0.150943	0.96875	0.577778			0.703704	0.4375	0.566667	0.119403
															0.265537	0.426036	0.1	0.552632			0.107692	0.142857	0.4	0.291667
															0.0352423	0.8	0.666667	0.0224359			0.259259	0.289474	0.205882	0.0921053
															0.714286	0.0769231	0.703704	0.115183			0.183673	0.2	0.170732	0.111111
															0.0909091	0.0941176	0.538462	0.259259			0.341463	0.434783	0.0842105	0.212121
															0.228571	0.535714	0.476191	0.134615			0.961538	0.150943	0.516129	0.411765
															0.194444	0.286885	0.0457516	0.588235			0.916667	0.368421	0.736842	0.118644
															0.35	0.198718	0.105769	0.112903			0.0753769	0.194444	0.121212	0.578947
															0.233333	0.366667	0.0654206	0.444444			0.3125	0.45	0.154839	0.304348
															0.228571	0.304348	0.209677	0.333333			0.2	0.269231	0.241379	0.114754
															0.102941	0.0479452	0.0808081	0.962963			0.585366	0.152174	0.0887097	0.205128
															0.521739	0.057554	0.347826	0.567568			0.403509	0.0511364	0.0879121	0.53125
															0.482143	0.170213	0.5	0.155844			0.132184	0.173077	0.375	0.304348
															0.153846	0.257353	0.141509	1			0.392157	0.18421	0.0251799	0.387097
															0.298507	0.392857	0.37037	0.542056			0.4	0.446429	0.12963	0.409091
															0.705882	0.181818	0.534884	0.435897			0.205882	0.140845	0.0972222	0.310345
															0.652174	0.627907	0.2	0.362445			0.678571	0.113924	0.636364	0.280488
															0.630435	0.364865	0.106667	0.258064			0.333333	0.409091	0.241379	0.368421
															0.152941	0.142857	0.210526	0.275862			0.206897	0.166667	0.5	0.545455
															0.580645	0.457627	0.292308	0.212121			0.368421	0.314286	0.0363636	0.180556
															0.175	0.155556	0.681818	0.25			0.28125	0.163265	0.413793	0.509804
															0.384615	0.323529	0.235294	0.324138			0.259259	0.17284	0.219512	0.25
															0.380952	0.12069	0.122807	0.588235			0.333333	0.36	0.0806452	0.147541
															0.209876	0.184874	0.18	0.9			0.308333	0.222222	0.134615	0.25
															0.296296	0.266667	0.302326	0.142857			0.473684	0.318182	0.233333	0.025
															0.0707071	0.272727	0.113475	0.84			0.150443	0.179487	0.333333	0.342466
															0.33871	0.575	0.170732	0.0555556			0.179487	0.0823529	0.110294	0.512195
															0.156716	0.208333	1	0.336066			0.587302	0.156863	0.36	0.131579
															0.565217	0.28	0.233333	0.444444			0.11	0.212121	0.625	0.0933333
															0.32	0.323529	0.205128	0.0921053			0.52	0.0283688	0.333333	0.472222
															0.304348	0.266667	0.152174	0.4375			0.44	0.0322581	0.121212	0.155556
															0.159204	0.333333	0.44186	0.15493			0.347826	0.348837	0.689655	0.421053
															0.28481	0.161905	0.692308	0.0410448			0.590909	0.305556	0.18421	0.125475
															0.333333	0.283019	0.735294	0.133333			0.106061	0.101266	0.142857	0.218487
															0.349057	0.27551	0.333333	0.304348			0.114754	0.1125	0.214286	0.0898876
															0.155039	0.340206	0.253165	0.0816327			0.148936	0.0901639	0.363636	0.216216
															0.0786517	0.09375	0.0880503	0.508772			0.133333	0.220779	0.0852713	0.242424
															0.5	0.596774	0.4	0.3			0.142857	0.0762712	0.0875	0.272727
															0.44	0.223404	0.35	0.833333			0.565217	0.304348	0.0410256	0.695652
															0.444444	0.238636	0.307692	0.780822			0.521739	0.347826	0.333333	0.257143
															0.307692	0.261905	0.191176	0.37594			0.102941	0.170732	0.636364	0.134328
															0.787879	0.416667	0.0915033	0.211982			0.508929	0.703704	0.558824	0.576923
															0.14	0.191489	0.111842	0.134259			0.330189	0.158537	0.0281125	0.341463
															0.0512821	0.25974	0.431818	1			0.9	0.274194	0.21875	0.636364
															0.241379	0.310811	0.4375	0.0483871			0.304348	0.26087	0.195122	0.121622
															0.127517	0.492958	0.28125	0.198895			0.324324	0.258064	0.109375	0.12963
															0.333333	0.308823	0.764706	0.35			0.254717	0.311111	0.266667	0.209302
															0.132353	0.209677	0.0666667	0.114754			1	0.0421053	0.08	0.411765
															0.5	0.40625	0.388889	0.0493827			0.141791	0.114286	0.285714	0.181818
															0.166667	0.152174	0.204301	0.244604			0.485714	0.133333	0.3125	0.416667
															0.30303	0.148148	0.380952	0.104651			0.191489	0.0854701	0.35	0.150943
															0.318182	0.133333	0.247423	0.391304			0.263158	0.146853	0.258064	0.0874317
															0.5	0.421053	0.282258	0.742857			0.22	0.114754		0.0564516
															0.245614	0.683333	0.785714	0.107692			0.368421	0.106557		0.242424
															0.111111	0.298246	0.595238	0.892857			0.164179	0.131148		0.478261
															0.375	0.155172	0.170213	0.346154			0.285714	0.225806		0.241379
															0.454545	0.381818	0.142857	0.407407			0.122807	0.111111		0.0769231
															0.23913	0.458333	0.153846	0.821429			0.168421	0.12963		0.488889
															0.25	0.466667	0.228916	0.896552			0.521739	0.132701		0.159091
															0.375	0.363636	0.333333	0.358974			0.961538	0.131783		0.318182
															0.407407	0.285714	0.252747	0.0853658			0.25641	0.291667		0.36
															0.3	0.321429	0.122222	0.227273			0.212121	0.111111
															0.434783	0.175	0.348315	0.39726			0.318182	0.281553
															0.116883	0.767442	0.205882	0.815789			0.0744681	0.441177
															0.233333	0.365854	0.266667	0.8			0.0952381	0.0473684
															0.466667	0.368421	0.416667	0.708333			0.409091	0.638554
															0.4375	0.6	0.486486	0.303571			0.205882	0.103448
															0.35	0.55	0.191176	0.155172			0.116667	0.169491
															0.352941	0.0876289	0.170213	0.132076			0.642857	0.430769
															0.163265	0.574468	0.714286	0.240741			0.466667	0.333333
															0.28125	0.0923567	0.21875	0.333333			0.388889	0.3125
															0.7	0.189189	0.428571	0.714286			0.0322581	0.411765
															0.45	0.144578	0.133333	0.608696			0.482759	0.223404
															0.318182	0.357576	0.25	0.4			0.0769231	0.75
															0.346154	0.163265	0.357143	0.0630631			0.216216	0.13834
															0.821429	0.075	0.4	0.358974			0.134615	0.108434
															0.2	0.318182	0.411765	0.036036			0.140351	0.0672269
															0.576923	0.304348	0.45	0.0992366			0.590909	0.333333
															0.192308	0.20979	0.823529	0.0727273			0.105263	0.0727273
															0.04375	0.714286	0.1875	0.241379			0.410526	0.257576
															0.151515	0.0833333	0.382979	0.304348			0.714286	0.07
															0.131148	0.170732	0.413044	0.189189			0.347826	0.134615
															0.163265	0.205357	0.441177	0.407407			0.148936	0.204082
															0.140187	0.152174	0.852941	1			0.532787	0.212121
															0.35	0.219512	0.4	0.0927835			0.259259	0.0391061
															0.736842	0.555556	0.71875	0.188679			0.333333	0.09375
															0.0864198	0.186047	0.75	0.666667			0.153846	0.209302
															0.451613	0.205128	0.266667	0.0918367			0.714286	0.310345
															0.0884956	0.0216049	0.826087	0.333333			0.258064	0.16
															0.269231	0.115942	0.0731707	0.470588			0.0421053	0.647059
															0.233333	0.894737	0.1	0.0440252			0.0860215	0.333333
															0.4	0.621622	0.283186	0.0952381			0.0978261	0.0625
															0.181818	0.423077	0.230769	0.174603			0.132076	0.114286
															0.15873	0.804598	0.313725	0.192983			0.291667	0.283951
															0.166667	0.142857	0.0400891	0.806452			0.181818	0.148936
															0.091954	0.216216	0.254545	0.25			0.289474	0.134615
															0.333333	0.421053	0.105882	0.433333			0.0952381	0.527027
															0.07	0.758621	0.333333	0.118644			0.232877	0.030303
															0.142857	0.333333	0.434783	0.155172			0.190476	0.1
															0.263158	0.3125	0.127907	0.148148			0.434783	0.0769231
															0.0672269	0.5	0.0536585	0.113208			0.12	0.275862
															0.0555556	0.6	0.333333	0.522388			0.615385	0.0243902
															0.212121	0.0565371	0.0921053	0.551724			0.112676	1
															0.116071	0.395161	0.0816327	0.452381			0.21875	0.0933333
															0.0941176	0.1875	0.0542636	0.269231			0.380952	0.191489
															0.22807	0.521739	0.135593	0.666667			0.205882	0.409091
															0.304348	0.333333	0.352941	0.2			0.196262	0.28
															0.423077	0.194444	0.333333	0.516667			0.954545	0.0470588
															0.0921053	0.454545	0.137255	0.35			0.147541	0.112676
															0.291667	0.145454	0.0695652	0.509434			0.358974	0.0522876
															0.56	0.313725	0.14	0.125			0.148936	0.342105
															0.148148	0.433333	0.310345	0.132076			0.234043	0.17
															0.0630631	0.28125	0.160494	0.135593			0.333333	0.135417
															0.0374331	0.211009	0.129412	0.76			0.347826	0.615385
															0.284884	0.216216	0.100656	0.448718			0.233333	0.5
															0.296296	0.32	0.515151	0.0839695			0.521739	0.0522876
															0.652174	0.173554	0.703704	0.0928571			0.310811	0.0952381
															0.307692	0.421053	0.473684	0.31579			0.179487	0.251462
															0.254144	0.644068	0.0264151	0.251497			0.21875	0.100629
															0.092437	0.316456	0.434783	0.0744681			0.2	0.5
															0.145833	0.320755	0.428571	0.0426829			0.333333	0.636364
															0.283784	0.435897	0.0557769	0.4			0.21875	0.0409357
															0.0645161	0.0440252	0.0973451	0.518518			0.473684	0.194444
															0.333333	0.112676	0.0263158	0.380952			0.2	0.348485
															0.363636	0.410526	0.333333	0.565217			0.126984	0.117647
															0.300971	0.112903	0.6	0.132076			0.159091	0.0673077
															0.205128	0.365079	0.0551181	0.826087			0.196429	0.290909
															0.413044	0.3375	0.189189	0.0489796			0.223881	0.182692
															0.197674	0.30137	0.071875	0.714286			0.5	0.0909091
															0.0995261	0.700787	0.5	0.323077			0.21875	0.166667
															0.0725806	0.212766	0.0514286	0.4			0.55	0.21875
															0.246753	0.490909	0.0688836	0.290323			0.64	0.0666667
															0.818182	0.153846	0.453608	0.253968			0.416667	0.228571
															0.2	0.408163	0.182796	0.135802			0.586207	0.197183
															0.625	0.142857	0.106667	1			0.168421	0.0519481
															0.253165	0.258064	0.0243056	0.1			0.548387	0.2
															0.289157	0.622951	0.0526316	0.0263158			0.36	0.6
															0.320755	0.74026	0.171875	0.482759			0.232558	0.25
															0.242424	0.348485	0.391304	0.166667			0.0648148	0.148148
															0.21875	0.111111	0.88	0.777778			0.258064	0.515151
															0.230769	0.233333	0.432432	0.307692			0.25	0.333333
															0.152174	0.785714	0.625	0.0897436			0.363636	0.175926
															0.104603	0.217391	0.486486	0.285714			0.142857	0.151899
															0.25	0.842105	0.0872093	0.142857			0.127273	0.0636364
															0.304348	0.681818	0.777778	0.333333			0.378378	0.0810811
															0.2	0.928571	0.0786517	0.205882			0.28	0.0686275
															0.27027	0.28	0.260274	0.492063			0.0857143	0.385542
															0.212766	0.215385	0.240741	0.0769231			0.333333	0.0921053
															0.971429	0.259259	0.333333	0.0875576			0.869565	0.0921053
															0.29703	0.183673	0.483333	0.08			0.4	0.1875
															0.186047	0.28	0.132353	0.045			0.421053	0.0945946
															0.297872	0.488372	0.4	0.244898			0.608696	0.45
															0.370968	0.3	0.65625	0.3125			0.478261	0.121212
															0.61194	0.28	0.1	0.133333			0.388889	0.183333
															0.259259	0.244565	0.465116	0.380952			0.410256	0.454545
															0.137931	0.818182	0.0424242	0.0825688			0.233333	0.163636
															0.416667	0.871795	0.64	0.2			0.152542	0.322581
															0.787879	0.458333	0.596491	0.529412			0.444444	0.208333
															0.461539	0.172414	0.162791	0.327273			0.5	0.466667
															0.170732	0.156028	0.382979	0.695652			0.368421	0.194444
															0.0875	0.758621	0.222222	0.277778			0.215278	0.212121
															0.0967742	0.28	0.384615	0.183673			0.473684	0.4
															0.206349	0.27451	0.271429	0.310345			0.411765	0.222222
															0.454545	0.483333	0.275862	0.555556			0.28125	0.170732
															0.8	0.155556	0.0786517	0.296296			0.529412	0.131148
															0.526316	0.3	0.0655738	0.02			0.242424	0.0638298
															0.5	0.307692	0.581395	0.181818			0.183673	0.101266
															1	0.328571	0.233333	0.0357143			0.101449	0.166667
															0.333333	0.43299	0.0571429	0.5			0.12069	0.166667
															0.163265	0.179487	0.3125	0.259259			0.241379	0.175
															0.8	0.156863	0.444444	0.421053			0.155556	0.0361446
															0.171233	0.642857	0.152542	0.0934579			0.368421	0.130841
															0.346939	0.166667	0.162162	0.482759			0.216216	0.505882
															0.0942408	0.368421	0.192983	0.258064			0.163265	0.0849057
															0.105263	0.333333	0.0740741	0.961538			0.894737	0.0454546
															0.204301	0.233333	0.23913	0.5			0.243902	0.116667
															0.0952381	0.216749	0.12963	0.25			0.233333	0.30303
															0.205128	0.368421	0.25	0.444444			0.5	0.0503145
															0.0674847	0.245902	0.290323	0.413793			0.92	0.192983
															0.05	0.319672	0.0736842	0.0546875			0.266667	0.298013
															0.363636	0.657895	0.5	0.291667			0.31579	0.0826446
															0.393939	0.132076	0.333333	0.275862			0.375	0.0538462
															0.18421	0.352941	0.121212	0.0760234			0.435897	0.0514706
															0.571429	0.102941	0.291667	0.177083			0.178295	0.333333
															0.259259	0.333333	0.112782	0.4			0.458333	0.655172
															0.0655738	0.589744	0.114943	0.194444			0.745098	0.473684
															0.113044	0.5	0.0933333	0.375			0.0673759	0.0625
															0.194444	0.2	0.0877863	1			0.0729167	0.354839
															0.210526	0.233918	0.12069	0.125			0.25	0.259259
															0.205128	0.257143	0.0707071	0.608696			0.35	0.155172
															0.230769	0.357143	0.681818	0.142857			0.444444	0.18421
															0.4	0.230769	0.0984848	0.304348			0.148148	0.266667
															0.607143	0.327273	0.12069	0.12963			0.30303	0.222222
															0.333333	0.173913	0.0555556	0.101266			0.583333	0.222222
															0.383333	0.318182	0.30303	0.151515			0.404762	0.730769
															0.5	0.638889	0.3	0.0769231			0.125	0.037037
															0.137255	0.484849	0.0347826	0.121495			0.32	0.113821
															0.125	0.318182	0.107143	0.0526316			0.4	0.0725806
															0.211268	0.410256	0.124183	0.205882			0.259259	0.0421687
															0.18	0.159091	0.152174	0.385965			0.388889	0.318182
															0.616667	0.54	0.28	0.147059			0.25	0.25641
															0.737705	0.5	0.642857	1			0.4	0.121622
															0.410256	0.454545	0.333333	0.925926			0.444444	0.272727
															0.122807	0.190476	0.611111	0.131868			0.973684	0.0620155
															0.347826	0.409836	0.391304	0.0627306			0.285714	0.285714
															0.196078	0.428571	1	0.101695			0.555556	0.444444
															0.076087	0.4375	0.1	0.0909091			0.333333	0.166667
															0.0461539	0.109375	0.342857	0.619048			0.966667	0.0322581
															0.117647	0.333333	0.0688073	0.0971429			0.454545	0.0855263
															0.408451	0.4	0.84	0.155172			0.1	0.142857
															0.921053	0.315068	0.5	0.142857			0.289474	0.0630631
															0.571429	0.457143	0.0864198	0.149533			0.290323	0.170732
															0.631579	0.31579	0.0343137	0.31579			0.236842	0.44
															0.225806	0.15873	0.039604	0.298013			0.625	0.21875
															0.168831	0.318182	0.157895	0.172222			0.288461	0.0490797
															0.708333	0.2	0.32	0.0666667			0.28	0.102941
															0.490196	0.5	0.0358974	0.870968			0.333333	0.0780488
															0.625	0.701754	0.0425532	0.0620155			1	0.0957447
															0.444444	0.525	0.26455	0.333333			0.396825	0.631579
															0.207547	0.241379	0.178571	0.125			0.225806	0.175
															0.835443	0.725	0.5	0.409091			0.134615	0.170732
															0.170732	0.235294	0.333333	0.464286			0.636364	0.375
															0.0877193	0.363636	0.196429	0.14			0.269231	0.25
															0.204082	0.194175	0.152174	0.1			0.333333	0.7
															0.642857	0.333333	0.0446927	0.266667			0.322581	0.103448
															0.153846	0.27451	0.0840336	0.107143			0.255814	0.045
															0.434783	0.407407	0.153153	0.807692			0.26087	0.123711
															0.258064	0.301075	0.208333	0.1			0.195122	0.112676
															0.754098	0.514286	0.181818	0.333333			0.181818	0.5625
															0.134146	0.186047	0.3375	0.149254			0.378378	0.333333
															0.8	0.45	0.404255	0.85			0.3	0.368421
															0.666667	0.213333	0.194444	0.243243			0.166667	0.235294
															0.0894309	0.305556	0.675	0.0465116			0.75	0.226667
															0.35	0.114286	0.309859	0.444444			0.517241	0.291667
															0.152542	0.62069	0.39726	0.366197			0.560976	0.666667
															0.609195	0.6	0.321429	0.6875			0.333333	0.0514706
															0.431818	0.676471	0.194444	0.869565			0.363636	0.318182
															0.425	0.576923	0.304348	0.121622			0.0918367	0.448276
															0.0214477	0.25	0.545455	0.0196629			0.35	0.072165
															0.0882353	0.155556	0.0956522	0.347826			0.45	0.32
															0.257143	0.195122	0.0707965	0.805556			0.5	0.204545
															0.197674	0.64	0.390625	0.558824			0.225564	0.357143
															0.241379	0.258064	0.122449	0.0444445			0.444444	0.213483
															0.36	0.565217	0.361446	0.0166667			0.714286	0.416667
															0.692308	0.123077	0.114754	0.126316			0.55	0.213333
															0.310345	0.555556	0.309524	0.0459364			0.590909	0.263158
															0.363636	0.204082	0.142857	0.0984456			0.458333	0.526316
															0.444444	0.0897436	0.145833	0.142857			0.478261	0.177419
															0.115942	0.230769	0.241758	0.59375			0.219178	0.4
															0.241758	0.179487	0.0813954	0.166667			0.208333	0.4375
															0.511628	0.0776699	0.323529	0.358974			0.310345	0.363636
															0.307692	0.0971787	0.291667	0.351351			0.235294	0.388889
															0.25	0.170732	0.141026	0.101266			0.32	0.617647
															0.111111	0.448276	0.0945946	0.0496689			0.36	0.266667
															0.0411765	0.195122	0.136986	0.177419			0.535714	0.318182
															0.444444	0.0367647	0.26087	0.166667			0.106061	0.608696
															0.142857	0.152344	0.264706	0.235294			0.243243	0.619048
															0.225806	0.0458333	0.119403	0.0591398			0.236364	0.161972
															0.19685	0.37037	0.625	0.811321			0.5	0.0231788
															0.480769	0.265957	0.31579	0.0714286			0.286822	0.0823529
															0.671429	0.166667	0.372881	0.136126			0.18421	0.758621
															0.438356	0.5	0.305085	0.342105			0.5	0.0853658
															0.820896	0.0769231	0.132076	0.0736842			0.318182	0.777778
															0.340909	0.285714	0.333333	1			0.5	0.0551181
															0.380952	0.08	0.46	0.0972222			0.333333	0.292453
															0.84	0.204545	0.625	0.12069			0.254902	0.259259
															0.30303	0.110032	0.145833	0.261905			0.789474	0.511111
															0.100592	0.197183	0.155556	0.0702703			0.122807	0.222222
															0.302326	0.0789474	0.322581	0.15873			0.35	0.0963855
															0.375	0.0701754	0.305556	0.104167			0.76	0.220126
															0.956522	0.268908	0.189189	0.645161			0.391304	0.0476191
															0.117647	0.521739	0.371429	0.37037			0.28	0.318182
															0.0578947	1	0.242424	0.108108			0.708333	0.0224719
															0.10084	0.272727	0.419355	0.072165			0.592593	0.156863
															0.266667	0.235294	0.448276	0.6			0.538462	0.140625
															0.253968	0.491525	0.0466667	0.52381			0.102564	0.212121
															0.35	0.476923	0.0282776	0.702128			1	0.0614035
															0.264706	0.5	0.269231	0.4			0.303797	0.177778
															0.0888889	0.106122	0.487179	0.148148			0.391304	0.18
															0.2	0.147541	0.227273	0.292683			1	0.0823529
															0.913044	0.153061	0.0365297	0.514286			0.3	0.271028
															0.280488	0.123967	0.395349	0.454545			0.428571	0.322581
															0.259259	0.186441	0.101124	0.0661157			0.219512	0.210526
															0.139665	0.24	0.158416	0.0288462			0.122449	0.310345
															0.310345	0.158537	0.037931	0.208333			0.203704	0.25
															0.138122	0.368421	0.0448718	0.205882			0.304348	0.292308
															0.421053	0.5	0.641509	0.295455			0.308823	0.85
															0.0709677	0.571429	0.361702	0.0169491			0.18421	0.401786
															0.607843	0.05	0.235294	0.0813008			0.347826	0.30303
															0.0737705	0.117188	0.425	0.8125			0.35	0.269231
															0.173077	0.268116	0.361111	0.436364			0.576923	0.56
															0.12963	0.158228	0.029661	0.909091			0.7	0.631579
															0.314286	0.413793	0.34375	0.371429			0.193182	0.140351
															0.346154	0.321429	0.72	0.109375			0.204545	0.352113
															0.273585	0.254237	0.241379	0.391892			0.368421	0.131387
															0.230769	0.072	0.833333	0.333333			0.578947	0.309524
															0.1	0.277778	0.0263158	0.285714			0.195652	0.733333
															0.134021	0.138461	0.128571	0.344828			0.161765	0.0945946
															0.222222	0.145833	0.0714286	0.866667			0.428571	0.132076
															0.204819	0.0650407	0.5	0.761905			0.11811	0.152174
															0.262295	0.0677966	0.0769231	0.127273			0.527778	0.1875
															0.269231	0.493151	0.521277	0.0934579			0.391304	0.115385
															0.277778	1	0.3	0.134454			0.25641	0.0864198
															0.177778	0.142857	0.223881	0.35			0.293104	0.227273
															0.136986	0.3	0.209302	0.0234114			0.433333	0.292683
															0.0603448	0.12	0.909091	0.607143			0.259259	0.529412
															0.475	0.21	0.0707071	0.894737			0.727273	0.213592
															0.820513	0.55	0.0679612	0.220513			0.270833	0.179487
															0.216216	0.172043	0.062069	0.152174			0.444444	0.28
															0.56	0.0972222	0.0366492	0.485714			0.304348	0.0816327
															0.131206	0.338235	0.229167	0.310345			0.454545	0.0824742
															0.5	0.307692	0.114865	0.642857			0.235294	0.197674
															0.304348	0.34375	0.0927152	0.333333			0.677419	0.097561
															0.827586	0.441177	0.25974	0.642857			0.371429	0.702703
															0.272727	0.588235	0.764706	0.0532544			0.190476	0.134615
															0.159575	0.666667	0.102564	0.243243			0.578947	0.185714
															0.141667	0.278689	0.457143	0.134328			0.0824176	0.455882
															0.190476	0.181395	0.0540541	0.538462			0.53125	0.333333
															0.428571	0.184615	0.35	0.962963			0.145833	0.264151
															0.0530303	0.318182	0.0701754	0.766667			0.366667	0.173077
															0.0714286	0.0989011	0.45	0.142857			0.380952	0.259259
															0.130435	0.232558	0.02	0.304348			0.333333	0.0666667
															0.454545	0.357143	0.864865	0.0578512			0.666667	0.211009
															0.476923	0.167665	0.072	0.894737			0.25	0.575758
															0.736842	0.0557491	0.576923	0.368421			0.416667	0.3125
															0.618182	0.515151	0.402062	0.0941176			0.578947	0.35
															0.761905	0.0451613	0.243243	0.216216			0.36	0.857143
															0.0526316	0.523077	0.0390625	0.241379			0.6	0.291667
															0.466667	0.444444	0.0825083	0.368421			0.703704	0.12973
															0.128378	0.169118	0.44	0.125			0.542857	0.0603448
															0.571429	0.580645	0.4	0.322581			0.180328	0.0812808
															0.104651	0.351064	0.126984	0.152174			0.259259	0.121622
															0.346154	0.5	0.0707071	0.411765			0.25	0.545455
															0.304348	0.142857	0.460317	0.653846			0.0482759	0.882353
															0.140187	0.198582	0.112903				0.541667	0.428571
															0.565217	0.197531	0.0476191				0.567568	0.631579
															0.25	0.179487	0.0776699				0.179487	0.152174
															0.225806	0.20354	0.0681818				0.5	0.46875
															0.266667	0.46	0.278689				0.307692	0.0497238
															0.0512821	0.16	0.325581				0.4	0.307692
															0.193277	0.0469799	0.195876				0.121212	0.0757576
															0.181818	0.875	0.242424				0.25	0.488372
															0.266667	0.230769	0.304348				0.518518	0.0673077
															0.436364	0.438272	0.357143				0.16	0.162791
															0.309524	0.216667	0.428571				0.64	0.271429
															0.379747	0.65	0.169811				0.555556	1
															0.487805	0.303448	0.0620155				0.857143	0.300885
															0.195652	0.294118	0.4				0.636364	0.0510949
															0.368421	0.297297	0.12963				0.6	0.344371
															0.186047	0.363636	0.0758621				0.346154	0.152047
															0.294118	0.708333	0.131148				0.177143	0.205882
															0.152542	0.756098	0.0578512				0.189189	0.233333
															0.234043	0.183333	0.184				0.960784	0.35
															0.321429	0.568966	0.0608696				0.62963	0.0761905
															0.914286	0.310924	0.18421				0.356164	0.181818
															0.428571	0.211538	0.82716				0.241379	0.259259
															0.0875	0.592593	0.195652				0.333333	0.148649
															0.241379	0.3125	0.12069				0.452055	0.318182
															0.287879	0.695652	0.2				0.1	0.576923
															0.384615	0.266667	0.0686275				0.526316	0.428571
															0.423077	0.363636	0.35				0.212121	0.127388
															0.104478	0.141414	0.159091				0.45	0.482759
															0.130081	0.351852	0.0958904				0.566667	0.0958904
															0.326531	0.623656	0.207792				0.18421	0.3
															0.333333	0.35	0.230769				0.205882	0.421569
															0.243902	0.0882353	0.147541				0.428571	0.157303
															0.75	0.254717	0.176471				0.160622	0.274419
															0.951219	0.2	0.18421				0.73913	0.438356
															0.152778	0.133333	0.35				0.884615	0.220779
															0.171875	0.416667	0.32				0.40625	0.0769231
															0.0697674	0.189189	0.347826				0.0625	0.681818
															0.368421	0.625	0.416667				0.269231	0.109589
															0.27027	0.533333	0.122807				0.18421	0.196078
															0.241379	0.363636	0.118644				0.194444	0.0791367
															0.372093	0.5625	0.259259				0.11579	0.134615
															0.231884	0.62	0.0578512				0.647059	0.76
															0.291667	0.761905	0.196078				0.5	0.241379
															0.304348	0.28	0.045				0.576923	0.387097
															0.169231	0.361111	0.03125				0.109375	0.0603448
															0.359375	0.7	0.354839				0.275862	0.222222
															0.164384	0.585366	0.476191				0.409091	0.65
															0.346154	0.348485	0.195652				0.311111	0.0571429
															0.424242	0.195652	0.111111				0.56	0.410256
															0.340278	0.662162	0.255814				0.346154	0.138686
															0.0648148	0.140741	0.122807				0.142857	0.137615
															0.571429	0.75	0.0445545				0.45946	0.222222
															0.0522388	0.476191	0.333333				0.631579	0.0921053
															0.169491	0.421053	0.0630631				0.35	0.382812
															0.072165	0.548387	0.104418				0.310345	0.0393258
															0.197802	0.310345	0.081761				0.363636	0.125
															0.137931	0.609195	0.259259				0.517241	0.102564
															0.416667	0.809524	0.134615				0.307692	0.366667
															0.45946	0.205128	0.126984				0.275862	0.346154
															0.0964912	0.0795455	0.044586				0.218182	0.0366973
															0.511111	0.265306	0.236842				0.375	0.333333
															0.346154	0.0806452	0.258621				0.35	1
															0.153846	0.416667	0.375				0.365854	0.517241
															0.310345	0.478261	0.194444				0.473684	0.0561798
															0.0614035	0.157576	0.0271084				0.464286	0.258621
															0.675	0.533333	0.347826				0.233333	0.219512
															0.145454	0.2	0.484277				0.212121	0.555556
															0.59887	0.262295	0.211538				0.380952	0.345238
															0.105882	0.346667	0.145454				0.138614	0.0769231
															0.16129	0.566038	0.369231				0.205128	0.0897436
															0.0619469	0.764706	0.0686275				0.28125	0.18
															0.0671141	0.4375	0.175				0.257143	0.134615
															0.536585	0.220588	0.0967742				0.525	0.235294
															0.55	0.785714	0.135593				0.179487	0.0483092
															0.140351	0.205128	0.287356				0.333333	0.12069
															0.29771	0.101449	0.774193				0.388889	0.107143
															0.106061	0.222222	0.528302				0.333333	0.1125
															0.4	0.276923	0.333333				0.277778	0.358974
															1	0.0803571	0.0842105				0.37037	0.306452
															0.298246	0.358025	0.480769				0.666667	0.0350877
															0.0776699	0.291139	0.0578035				0.25	0.8
															0.735294	0.205128	0.628571				0.145833	0.0985916
															0.0967742	0.545455	0.4375				0.333333	0.313725
															0.551724	0.2	0.31579				0.434783	0.28
															0.28	0.35	0.0209581				0.142857	0.0434783
															0.517647	0.179487	0.384				0.28125	0.716981
															0.253731	0.0304348	0.375				0.5	0.678571
															0.0816327	0.210526	0.545455				0.810811	0.0707071
															0.318182	1	0.236364				0.333333	0.545455
															0.452381	0.517241	0.056338				0.32	0.216216
															0.321429	0.322581	0.487179				0.486486	0.695652
															0.256	0.24	0.259259				0.0569106	0.245902
															0.1875	0.0402299	0.209302				0.21875	0.542857
															0.145161	0.142857	0.576923				0.25	0.384615
															0.706667	0.896104	0.22807				0.1	0.218182
															0.512195	0.2	0.104478				0.388889	0.692308
															0.64	0.111111	0.434783				0.368421	0.621622
															0.5	0.657143	0.333333				0.333333	0.3125
															1	0.476191	0.290909				0.32	0.08
															0.59322	0.212121	0.414634				0.189189	0.275862
															0.432432	0.277193	0.244898				0.275862	0.233333
															0.301587	0.235294	0.344828				0.0784314	0.12963
															0.615385	0.28125	0.324561				0.189189	0.5
															0.3125	0.232558	0.55				0.307692	0.0643564
															0.186275	0.5625	0.390244				0.114583	0.304348
															0.512195	0.165563	0.130435				0.333333	0.680851
															0.176471	0.0803571	0.202703				0.261905	0.4
															0.292308	0.909091	0.1875				0.137931	0.546875
															0.180851	0.0689655	0.4				0.347826	0.18
															0.189189	0.166667	0.341463				0.269231	0.0704225
															0.578947	0.175676	0.544118				0.180556	0.172414
															0.380952	0.0571429	0.233333				0.357143	0.115942
															0.222222	0.0731707	0.0954774				0.8	0.793103
															0.434783	0.11	0.20202				0.318182	0.368421
															0.241379	0.123077	0.533333				0.275862	0.125
															0.474359	0.318182	0.105882				0.291667	0.0993378
															0.546667	0.230769	0.448718				0.152542	0.296296
															0.258064	0.111111	0.356522				0.380952	0.259259
															0.12963	0.414634	0.418605				0.169231	0.0479042
															0.205882	0.48	0.235294				0.354839	0.210526
															0.291667	0.186441	0.266667				0.145161	0.421053
															0.678571	0.470588	0.346154				0.36	0.0636364
															0.153846	0.228571	0.727273				0.965517	0.333333
															0.25	0.571429	0.186992				0.259259	0.478261
															0.106061	0.362319	0.27907				0.416667	0.0823529
															0.442308	0.0740741	0.264706				0.375	0.189655
															0.742857	0.119403	0.103896				0.793103	0.289474
															0.25	0.705882	1				0.2	0.1125
															0.241935	0.209302	0.15493				0.390244	0.447368
															0.206897	0.444444	0.147541				0.473684	0.179487
															0.592593	0.116667	0.0701754				0.642857	0.155405
															0.116667	0.274194	0.0933333				0.225	0.60274
															0.649123	0.285714	0.26				0.175	0.25641
															0.339286	0.0591398	0.118182				0.205882	0.318182
															0.76	0.0707071	0.529412				0.454545	0.262136
															0.803922	0.340425	0.173913				0.684211	0.368421
															0.711111	0.142857	0.0777778				0.590909	0.357143
															0.7	0.0479452	0.321429				0.65	0.112676
															0.326087	0.0402299	0.259259				0.444444	0.14876
															0.434783	0.516667	0.0941176				0.333333	0.421053
															0.625	0.173913	0.114943				0.545455	0.72
															0.407407	0.432432	0.25				0.5	0.4
															0.289474	0.657143	0.264706				0.608696	0.186047
															0.28	0.0591716	0.3				0.318182	0.192661
															0.457143	0.954545	0.45				0.190476	0.259259
															0.482759	0.442105	0.352941				0.64	0.258064
															0.393939	0.272727	0.371429				0.162791	0.206522
															0.818182	0.159091	0.179487				0.304348	0.0744681
															0.607143	0.521739	0.392857				0.318182	0.472527
															0.380952	0.109489	0.259259				0.416667	0.11828
															0.434783	0.754717	0.608696				0.117647	0.240964
															1	0.119403	0.291667				0.258064	0.348837
															0.0334928	0.354167	0.158333				0.470588	0.307692
															0.0391061	0.102362	0.0841121				0.380952	0.258064
															0.390625	0.36	0.0629371				0.526316	0.4
															0.0677966	0.388889	0.424242				0.444444	0.275862
															0.428571	0.72973	0.346154				0.457143	0.3
															0.358025	0.0729167	0.034384				0.291667	0.117647
															0.0696202	0.319444	0.0714286				0.642857	0.431373
															0.0754717	0.213333	0.108434				0.363636	0.761905
															0.767442	0.21875	0.108108				0.15942	0.454545
															0.571429	0.326087	0.18				0.428571	0.159091
															0.0234604	0.675	0.136364				0.363636	0.172414
															0.45	0.310345	0.0833333				0.257143	0.205882
															0.377484	0.363636	0.227273				0.266667	0.411765
															0.212389	0.375	0.231884				0.166667	0.205882
															0.0830325	0.0804598	0.0378378				0.259259	0.617647
															0.738095	0.151515	0.111111				0.5	0.290323
															0.531915	0.115385	0.121622				0.145833	0.37037
															0.57971	0.1	0.197674				0.2	0.333333
															0.304348	0.12844	0.258064				0.233333	0.55
															0.259259	0.263158	0.264706				0.368421	0.189189
															0.0506329	0.235294	0.189189				0.195122	0.148148
															0.0380435	0.340425	0.488889				0.272727	0.076087
															0.448276	0.233333	0.106796				0.476191	0.0742459
															0.268293	0.179487	0.0590717				0.428571	0.07
															0.150685	0.0567164	0.044586				0.553191	0.150376
															0.262774	0.109375	0.0547945				0.733333	0.121951
															1	0.13253	0.474576				0.304348	0.18421
															0.756757	0.465116	0.439024				0.142857	0.0470588
															0.293104	0.359375	0.0555556				0.375	0.25
															0.612903	0.424242	0.157303				0.666667	0.0949721
															0.322581	0.3125	0.242424				0.181818	0.875
															0.152542	0.216216	0.0909091				0.225806	0.292683
															0.22807	0.35	0.375				0.290323	0.303571
															0.226415	0.0429448	0.217391				0.181818	0.452381
															0.619048	0.0963855	0.268817				0.35	0.173333
															0.0860215	0.121212	0.0731707				0.383333	0.042654
															0.565217	0.153846	0.265306				0.125	0.211268
															0.0444445	0.123077	0.0555556				0.357143	0.192983
															0.604651	0.105769	0.862069				0.25	0.142857
															0.38806	0.347826	0.0604027				0.434783	0.68
															0.064257	0.676471	0.25				0.65	0.833333
															0.121387	0.368421	1				0.576923	0.144445
															0.3	0.119565	0.0369004				0.35	0.311321
															0.830189	0.0237389	0.782609				0.714286	0.107477
															0.6	0.0540541	0.157895				0.347826	0.353658
															0.480769	0.0334928	0.485714				0.304348	0.210145
															0.425532	0.062069	0.226415				0.37931	0.241379
															0.269231	0.283784	0.142857				0.421053	0.380952
															0.409091	0.388889	0.833333				0.243902	0.25
															0.575	0.0503145	0.333333				0.209302	0.175
															0.123288	0.736842	0.102273				0.152174	0.0555556
															0.703704	0.368421	0.0482759				0.4	0.451219
															0.0217391	0.110345	0.211111				0.225806	0.5
															0.516667	0.26087	0.388889				0.391304	0.304348
															0.0530303	0.146667	0.0645161				0.4	0.407407
															0.608696	0.4125	0.14				0.291667	0.708333
															0.0529101	0.0648148	0.380952				0.857143	0.363636
															0.350877	0.0825688	0.121622				0.25	0.322581
															0.407143	0.0833333	0.0714286				0.884615	0.246154
															0.612903	0.380952	0.288889				0.333333	0.236111
															0.354167	0.0284697	0.548387				0.142857	0.318182
															0.147287	0.0343137	0.536585				0.219512	0.0843374
															0.0327869	0.282353	0.619048				0.115385	0.148148
															0.407407	0.0851064	0.68				0.129032	0.106977
															0.125	0.522727	0.363636				0.296296	0.25
															0.77907	0.112903	0.25				0.4	0.135593
															0.434783	0.179487	0.851852				0.222222	0.176471
															0.6	0.0387324	0.0530303				0.166667	0.28
															0.404255	0.727273	0.254386				0.173913	0.0380952
															0.148148	0.631579	0.057377				0.347826	0.133333
															0.0941176	0.410959	0.420168				0.367347	0.075188
															0.151515	0.167883	0.296296				0.628571	0.413793
															0.0810811	0.0813954	0.36				0.2	0.122807
															0.132076	0.148148	0.0636364				0.269231	0.558824
															0.0490566	0.177778	0.117647				0.177778	0.633333
															0.484849	0.0344828	0.166667				0.296296	0.270492
															0.302326	0.485714	0.309524				0.269231	0.0736842
															0.258064	0.0958904	0.118644				0.291667	0.186047
															0.444444	0.5	0.702703				0.274194	0.505618
															0.0578512	0.645161	0.118421				0.25	0.138461
															0.904762	0.826087	0.166667				0.241379	0.142458
															0.1	0.545455	0.25				0.333333	0.290323
															0.914286	0.7	0.703704				0.4	0.321429
															0.291667	0.314815	0.342105				0.368421	0.160804
															0.0648148	0.676471	0.428571				0.421053	0.274194
															0.0909091	0.27907	0.380952				0.37037	0.119403
															0.166667	0.553398	0.296296				0.241379	0.142857
															0.260163	0.118421	0.333333				0.411765	0.142857
															0.18239	0.793103	0.789474				0.121212	0.0714286
															0.0747663	0.183544	0.478261				0.444444	0.0362538
															0.904762	0.225806	0.152778				0.0958904	0.0252366
															0.176471	0.454545	0.201258				0.333333	0.178082
															0.0933333	0.551724	0.13253				0.241379	0.0384615
															0.364583	0.703704	0.244444				0.127273	0.279412
															0.432432	0.257143	0.476191				0.533333	0.118577
															0.305556	0.28169	0.333333				0.25	0.357143
															0.137931	0.139344	0.0257235				0.177778	0.0813954
															0.105263	0.285714	0.119403				0.869565	0.291667
															0.0531915	0.431373	0.576923				0.0952381	0.162791
															0.974359	0.622222	0.0469799				0.4	0.241379
															0.359375	0.054878	0.0313725				0.4375	0.233333
															0.340909	0.545455	0.421053				0.153846	0.35
															0.6	0.0761905	0.0516129				0.35	0.277228
															0.458333	0.122807	0.166667				0.134615	0.122807
															0.909091	0.404255	0.0213415				0.2	0.344828
															0.76	0.590909	0.0460526				0.35	0.0627615
															0.298851	0.310345	0.36				0.333333	0.291139
															0.208333	0.107914	0.122807				0.368421	0.35
															0.216216	0.210526	0.5				0.097561	0.482759
															0.0434783	0.210526	0.169811				0.639344	0.428571
															0.588235	0.283582	0.296296				0.375	0.488889
															0.567568	0.305556	0.205882				0.4	0.5
															0.222222	0.291971	0.0630631				0.363636	0.144927
															0.208333	0.0511628	0.75				0.333333	0.132076
															0.179104	0.257576	0.0987654				0.150943	0.45
															0.0958904	0.0474934	0.217949				0.242857	0.387097
															0.25641	0.92	0.2				0.269231	0.0792079
															0.535714	0.527778	0.25				0.216216	0.166667
															0.333333	0.236364	0.145833				0.333333	0.0884956
															0.104478	0.204082	0.109375				0.411765	0.285714
															0.0530303	0.191176	0.297619				0.304348	0.363636
															0.2	0.259259	0.25				0.216216	0.64
															0.389831	0.235294	0.18617				0.241379	0.0426829
															0.585366	0.310345	0.434783				0.545455	0.153846
															0.121622	0.407407	0.225				0.333333	0.266667
															0.059322	0.678571	0.307692				0.387097	0.238095
															0.84375	0.151515	0.954545				0.229508	0.380952
															0.789474	0.321429	0.3125				0.153846	0.380952
															0.576923	0.311475	0.109375				0.0695652	0.0776699
															0.224299	0.351351	0.0833333				0.150443	0.104478
															0.583333	0.102564	0.0990566				0.145454	0.0810811
															0.738095	0.15873	0.594595				0.194444	0.212121
															0.807692	0.9	0.0333333				0.371429	0.55102
															0.618182	0.419214	0.0429448				0.366197	0.186047
															0.304348	0.205882	0.631579				0.106061	0.451613
															0.405405	0.214286	0.282051				0.677419	0.652174
															0.116279	0.246988	0.282051				0.30303	0.0714286
															0.115385	0.237288	0.372549				0.551724	0.0727273
															0.460526	0.466667	0.0631579				0.615385	0.241379
															0.472222	0.0948276	0.375				0.103448	0.08
															0.0933333	0.333333	0.454545				0.326923	0.177778
															0.457143	0.262195	0.0378788				0.128205	0.371429
															0.114286	0.178862	0.230769				0.333333	0.233333
															0.253731	0.0492611	0.0409207				0.403509	0.111111
															0.771429	0.382353	0.190476				0.0875	0.380952
															0.789474	0.621622	0.628571				0.3	0.414634
															0.461539	0.4	0.127451				0.157895	0.325
															0.210526	0.470588	0.410256				0.666667	0.259259
															0.228571	0.0729167	0.140845				0.275862	0.333333
															0.592593	0.153061	0.369565				0.166667	0.0808081
															0.5	0.170732	0.125				0.163265	0.246446
															0.541667	0.271605	0.0649351				0.155556	0.481482
															0.126168	0.310345	0.0987654				0.318182	0.175
															0.0655738	0.148148	0.576923				0.375	0.0559702
															0.101266	0.413793	0.0869565				0.321429	0.0330882
															0.126761	0.378788	0.0373832				0.166667	0.358974
															0.383929	0.268456	0.0542636				0.192308	0.115942
															0.0485714	0.283951	0.377778				0.569106	0.258621
															0.11588	0.294574	0.180723				0.166667	0.0557851
															0.481013	0.352941	0.333333				0.857143	0.363636
															0.1	0.454545	0.388889				0.418605	0.247423
															0.28125	0.16	0.0269461				0.361111	0.0780488
															0.46087	0.358974	0.135135				0.8	0.205882
															0.479452	0.606061	0.233333				0.259259	0.0661765
															0.172308	0.129496	0.0864198				0.347826	0.184615
															0.0555556	0.688889	0.0228013				0.132353	0.0463576
															0.162791	0.165605	0.0934066				0.287671	0.314286
															0.171271	0.140625	0.285714				0.619048	0.040201
															0.37037	0.0932203	0.52381				0.3	0.0636364
															0.267857	0.0367647	0.6875				0.0744681	0.10989
															0.3125	0.413145	0.275862				0.6	0.0679612
															0.333333	0.392405	0.571429				0.933333	0.225806
															0.368	0.28	0.913044				0.714286	0.295775
															0.58209	0.0816327	0.125				0.0897436	0.288461
															0.157895	0.814815	0.159575				0.627907	0.153061
															0.363636	0.676471	0.0652174				0.134615	0.207143
															0.0917431	0.104418	0.0424528				0.290323	0.0466472
															0.0875	0.139344	0.4				0.205128	0.0384615
															0.225806	0.107843	0.0384615				0.368421	0.0272374
															0.0689655	0.851351	0.612903				0.266667	0.588235
															0.0826446	0.227273	0.166667				0.368421	0.273809
															0.253394	0.333333	0.104234				0.22172	0.217647
															0.318182	0.297297	0.230769				0.0762712	0.136364
															0.415929	0.588235	0.0433333				0.189655	0.24
															0.34	0.181818	0.295082				0.54	0.0314685
															0.529412	0.952381	0.0943396				0.0648148	0.363636
															0.208633	0.195652	0.186047				0.128205	0.0462633
															0.695652	0.180328	0.578947				0.0564516	0.333333
															0.366667	0.735294	0.884615				0.277778	0.0666667
															0.621622	0.826087	0.190476				0.7	0.172414
															0.196429	0.243243	0.126761				0.318182	0.0315457
															0.866667	0.6	0.0853658				0.100877	0.0958904
															0.428571	0.25	0.18421				0.0833333	0.189655
															0.097561	0.0629371	0.0292887				0.144144	0.321429
															0.403973	0.291667	0.179487				0.555556	0.366197
															0.148936	0.195122	0.74				0.32	0.174603
															0.697674	0.439024	0.896552				0.228571	0.35
															0.254237	0.366337	0.470588				0.169811	0.136905
															0.863636	0.767442	0.258929				0.590909	0.5
															0.52381	0.735294	0.0855615				0.123077	0.608696
															0.369565	0.166667	0.583333				0.0833333	0.123595
															0.0366492	0.107527	0.367647				0.198113	0.2
															0.326923	0.121795	0.0941176				0.714286	0.177778
															0.62069	0.194444	0.411765				0.714286	0.297297
															0.344262	0.423077	0.097561				0.134615	0.0534351
															0.75	1	0.413793				0.034632	0.0707071
															0.423077	0.864865	0.292308				0.673469	0.241379
															0.367769	0.140351	0.0630631				0.368421	0.07
															0.657143	0.290698	0.0720721				0.805556	0.146067
															0.474138	0.0421687	0.0813954				0.307692	0.241379
															0.518518	0.731707	0.26506				0.414286	0.269231
															0.0927835	0.446808	0.571429				0.111111	0.4375
															0.2	0.202454	0.0696202				0.212121	0.12069
															0.136691	0.261905	0.744186				0.526316	0.205882
															0.175532	0.769231	0.177778				0.3125	0.275862
															0.238095	0.0985916	0.127273				0.52381	0.177778
															0.583333	0.25	0.5				0.205882	0.2
															0.189189	0.35	0.0679612				0.0967742	0.304348
															0.202128	0.37931	0.0884956				0.190476	0.0411765
															0.821918	0.186667	0.212121				0.375	0.0195228
															0.262911	0.362069	0.55				0.818182	0.434783
															0.9	0.327869	0.35				0.103448	0.0182186
															0.869565	0.558824	0.173228				0.895833	0.0792079
															0.704545	0.0965517	0.368421				0.45	0.076087
															0.102273	0.375	0.45				0.4	0.205882
															0.318182	0.168317	0.219512				0.396947	0.0927835
															0.333333	0.410714	0.467742				0.0736842	0.0647482
															0.257143	0.28125	0.0402299				0.233333	0.252525
															0.258621	0.613636	0.375				0.45	0.0851064
															0.535714	0.714286	0.1				0.416667	0.0701754
															0.0564516	0.27027	0.0444445				0.545455	0.107143
															0.245283	0.150538	0.290323				0.488372	0.189189
															0.411765	0.533333	0.466667				0.365079	0.142857
															0.0681818	0.272727	0.15534				0.266667	0.421053
															0.367347	0.0967742	0.103774				0.0945946	0.333333
															0.275591	0.475	0.205882				0.368421	0.12931
															0.142857	0.786517	0.0897436				0.372549	0.11
															0.128205	0.511628	0.25641				0.266667	0.821429
															0.597561	0.263158	0.0958904				0.225352	0.282353
															0.120482	0.6	0.255319				0.230769	0.0354331
															0.692308	0.233333	0.875				0.496894	0.375
															0.452381	0.358974	0.113402				0.28	0.204545
															0.880952	0.333333	0.125				0.277778	0.186047
															0.65625	0.54054	0.097561				0.296296	0.207317
															0.551724	0.127273	0.136986				0.410959	0.304348
															0.347826	0.255814	0.64				0.35	0.0610687
															0.5	0.2	0.133333				0.0629371	0.275
															0.121212	0.292308	0.121951				0.384615	0.0189574
															0.101266	0.775862	1				0.365079	0.173077
															0.290909	0.155172	0.216216				0.411765	0.0386473
															0.4	0.203704	0.543478				0.454545	0.5
															0.380952	0.172414	0.0736842				0.3125	0.0786517
															0.5	0.25	0.216867				0.153846	0.141593
															0.208333	0.770833	0.283582				0.112903	0.2
															0.0909091	0.1875	0.339623				0.433333	0.25
															0.5	0.348837	0.292683				0.45	0.291667
															0.615385	0.266667	0.181818				0.615385	0.46875
															0.37037	0.432432	0.130435				0.3	0.10219
															0.408451	0.233333	0.173913				0.078341	0.152778
															0.141414	0.25	0.114754				0.222222	0.424242
															0.571429	0.586207	0.0786517				0.0901639	0.0896057
															0.789474	0.555556	0.388889				0.266667	0.173913
															0.476191	0.318182	0.660377				0.675676	0.15873
															0.563218	0.32	0.142857				0.5625	0.421053
															0.644068	0.434783	0.323529				0.833333	0.37931
															0.126761	0.318182	0.189189				0.206897	0.149425
															0.113636	0.5	0.210526				0.529412	0.0509554
															0.333333	0.5	0.160714				0.191489	0.130435
															0.641026	0.0915033	0.4				0.340425	0.157895
															0.341463	0.0338164	0.359375				0.509434	0.566667
															0.333333	0.163044	0.318182				0.44	0.368421
															0.133641	0.0714286	0.857143				0.318182	0.0853658
															0.6	0.22807	0.45946				0.198473	0.32
															0.401869	0.35	0.407407				0.208093	0.337209
															0.4	0.350877	0.4				0.35	0.0547945
															0.28125	0.225352	0.85				0.233333	0.0553846
															0.446154	0.52381	0.384615				0.0892857	0.106383
															0.127273	0.106952	0.18				0.166667	0.333333
															0.346154	0.537415	0.65				0.151515	0.32
															0.444444	0.417911	0.857143				0.0842105	0.275862
															0.318182	0.330508	0.311111				0.75	0.0458716
															0.291667	0.0752688	0.285714				0.435897	0.296296
															0.23913	0.727273	0.179487				0.304348	0.0820513
															0.133333	0.232673	0.263158				0.0686275	0.130435
															0.741935	0.236364	0.243243				0.225806	0.0444445
															0.233333	0.392857	0.444444				0.2	0.304348
															0.0677966	0.057377	0.735294				0.0808081	0.159091
															0.353658	0.241379	0.212121				0.605263	0.0963855
															0.363636	0.0333333	0.321429				0.519231	0.0613027
															0.272727	0.416667	0.25				0.571429	0.210526
															0.589286	0.324324	0.291667				0.409091	0.115538
															0.0416667	0.0853658	0.0743802				0.340425	0.391304
															0.606061	0.137255	0.205882				0.304348	0.4375
															0.495146	0.172222	0.708333				0.137255	0.0886076
															0.27027	0.578947	0.756098				0.114754	0.0673575
															0.3	0.428571	0.0526316				0.341463	0.0514706
															0.207792	0.648649	0.454545				0.259259	0.477273
															0.0823529	0.22449	0.016				0.526316	0.92
															0.238095	0.454545	0.36				0.384	0.145454
															0.12	0.162393	0.619048				0.18421	0.347826
															0.076087	0.266667	0.259259				0.575758	0.170213
															0.470588	0.710526	0.196078				0.155556	0.248227
															0.448276	0.277778	0.100402				0.381818	0.28125
															0.0533333	0.135021	0.322034				0.19598	0.179487
															0.347368	0.285714	0.106061				0.205882	0.75
															0.44	0.555556	0.0325733				0.440678	0.14375
															0.0864198	0.296296	0.170213				0.285714	0.0684932
															0.0806452	0.157143	0.204651				0.391304	0.057971
															0.108108	0.488889	0.263566				0.280992	0.121951
															0.203704	0.588235	0.526316				0.117188	0.208333
															0.035533	0.196078	0.0763052				0.0673077	0.07
															1	0.375	0.32				0.423913	0.451219
															0.388889	0.0273438	0.0630631				0.347826	0.351351
															0.060241	0.933333	0.0436893				0.391304	0.104478
															0.92	0.0707965	0.275862				0.652174	0.180556
															0.430894	0.115702	0.318182				0.123223	0.64
															0.52381	0.35	0.283582				0.318182	0.294118
															0.218182	0.568182	0.727273				0.333333	0.230769
															0.209302	0.25	0.333333				0.467742	0.347826
															0.363636	0.614035	0.314286				0.382979	0.146342
															0.913044	0.40625	0.12987				0.152174	0.0804598
															0.130233	0.476191	0.0972222				0.22807	0.0357143
															0.272727	0.5	0.0843374				0.25	0.0804598
															0.204545	0.028169	0.059322				0.212121	0.121622
															0.703125	0.333333	0.193995				0.15873	0.466667
															0.149533	0.333333	0.219048				0.4375	0.0253165
															0.225806	0.373134	0.232558				0.175	0.0930233
															0.833333	0.318182	0.183099				0.141304	0.305085
															0.7	0.428571	0.0298507				0.166667	0.0818182
															0.652174	0.712963	0.333333				0.18421	0.234043
															0.29703	0.152866	0.0859375				0.147541	0.0670732
															0.565217	0.424242	0.457364				0.225806	0.0494506
															0.588235	0.744898	0.225806				0.142857	0.242424
															0.168874	0.25	0.535714				0.333333	0.3
															0.110236	0.212121	0.155556				0.37931	0.12963
															0.0636364	0.194444	0.428571				0.310559	0.269231
															0.097561	0.421687	0.164179				0.241379	0.2
															0.132076	0.439024	0.0777778				0.353846	0.392857
															0.195122	0.346154	0.358974				0.366667	0.123348
															0.55	0.19084	0.137931				0.0603448	0.156863
															0.147059	0.478261	0.380952				0.25	0.21875
															0.0808081	0.6	0.229167				0.175	0.194444
															0.243243	0.421053	0.45				0.2	0.447368
															0.470588	0.023569	0.363636				0.283019	0.120879
															0.409091	0.109589	0.156				0.5625	0.194444
															0.4	0.223881	0.892857				0.0784314	0.625
															0.0967742	0.5	0.0985916				0.189189	0.0538462
															0.509804	0.204082	0.166667				0.189189	0.5
															0.291667	0.644444	0.533333				0.171875	0.0784314
															0.481482	0.333333	0.0380435				0.166667	0.126984
															0.146154	0.55814	0.189189				0.54054	0.194444
															0.285714	0.101852	0.123077				0.32	0.192308
															0.376068	0.741935	0.310345				0.0583942	0.0171149
															0.615385	0.320755	0.189189				0.235294	0.0288462
															0.0615385	0.304348	0.5				0.375	0.0769231
															0.196429	0.25	0.3				0.30303	0.0596027
															0.176471	0.236842	0.305556				0.28	0.0432099
															0.118421	0.473684	0.333333				0.12069	0.102941
															0.0518518	0.0588235	0.216216				0.268293	0.169811
															0.304348	0.306123	0.0496894				0.219512	0.12963
															0.369863	0.607143	0.0777778				0.282609	0.736842
															0.25	0.73913	0.473684				0.368421	0.363636
															0.6875	0.241107	0.233333				0.416667	0.0485437
															0.85	0.162791	0.368421				1	0.490566
															0.2	0.296296	0.517241				0.666667	0.211765
															0.69697	0.155172	0.0860927				0.242424	0.188119
															0.388889	0.277778	0.425287				0.333333	0.352941
															0.222222	0.0743802	0.348315				0.194444	0.0569106
															0.159091	0.310881	0.105263				0.53125	0.104478
															0.234323	0.369231	0.241379				0.55	0.0534759
															0.864865	0.476191	0.461539				0.233333	0.112948
															0.918919	0.159091	0.0754717				0.434783	0.142857
															0.101266	0.344444	0.352941				0.318182	0.132076
															0.167785	0.138249	0.275862				0.147059	0.228571
															0.0635838	0.0344828	0.175				0.32	0.4
															0.555556	0.934783	0.470588				0.480769	0.101266
															0.84375	0.177778	0.0544747				0.0813954	0.304348
															0.0860215	0.185714	0.361446				0.285714	0.272727
															0.380952	0.3	0.163265				0.486486	0.181818
															0.0973783	0.209302	0.259259				0.103896	0.259259
															0.345454	0.388889	0.0311419				0.714286	0.409091
															0.380952	0.140426	0.0810811				0.421053	0.637931
															0.170732	0.252427	0.280702				0.166667	0.150327
															0.469388	0.154206	0.48				0.209302	0.151899
															0.0710901	0.306931	0.0662252				0.142857	0.225806
															0.137255	0.189815	0.258064				0.212121	0.134615
															0.444444	0.5	0.0470086				0.206349	0.189189
															0.169491	0.132353	0.25				0.722222	0.181034
															0.108108	0.266667	0.163265				0.875	0.120482
															0.0729927	0.0415094	0.272727				0.673077	0.0875
															0.172414	0.202899	0.314286				0.28	0.2
															0.139535	0.170732	0.324561				0.181818	0.711864
															0.56	0.781818	0.5				0.625	0.0486111
															0.337662	0.257143	0.606061				0.565217	0.0843374
															0.380952	0.213043	0.288461				0.261905	0.0841121
															0.156863	0.294118	0.391304				0.8	0.274194
															0.520833	0.0588235	0.195122				0.285714	0.611111
															1	0.168539	0.28125				0.473684	0.233333
															0.446429	0.608696	0.0717703				0.212121	0.3125
															0.323864	0.555556	0.214286				0.5	0.137255
															0.278106	0.0559441	0.241379				0.653846	0.295238
															0.180723	0.140351	0.264151				0.171946	0.145833
															0.35	0.537313	0.28				0.0968858	0.09
															0.0892857	0.529412	0.121212				0.753425	0.0909091
															0.408163	0.896552	0.384615				0.551724	0.0751174
															0.125	0.0619469	0.25				0.4	0.605263
															0.363636	0.409091	0.342857				0.255814	0.259259
															0.0580645	0.384615	0.3125				0.0769231	0.0714286
															0.0496894	0.277778	0.297872				0.205882	0.205882
															0.542857	0.478261	0.0348259				0.0909091	0.0503145
															0.275862	0.132076	0.212121				0.111111	0.478261
															0.166667	0.684932	0.243243				0.235294	0.189189
															0.526316	0.109677	0.108808				0.12069	0.0851064
															0.371429	0.291667	0.363636				0.35	0.194444
															0.478261	0.0448718	0.21875				0.25	0.152174
															0.10989	0.160714	0.173913				0.166667	0.132076
															0.225	0.246377	0.190476				0.633333	0.0578512
															0.25	0.145833	0.177778				0.470588	0.04
															0.32	0.135714	0.130435				0.325301	0.375
															0.301887	0.654545	0.153333				0.27027	0.653846
															0.566667	0.557377	0.118421				0.228571	0.056
															0.175	0.29771	0.164557				0.428571	0.275862
															0.0489511	0.225806	0.0795455				0.275862	0.129032
															0.21875	0.714286	0.396552				0.333333	0.04375
															0.233333	0.35	0.155556				0.625	0.388889
															0.116883	0.652174	0.256757				0.172414	0.186813
															0.243243	0.123894	0.211538				0.328571	0.465116
															0.421053	0.333333	0.482759				0.652174	0.0816327
															0.464286	0.833333	0.307692				0.9	0.607143
															0.823529	0.482759	0.285714				0.0462046	0.238806
															0.222222	0.192308	0.176471				0.354167	0.4
															0.339286	0.170732	0.106667				0.438775	0.126126
															0.148148	0.318182	0.148936				0.298893	0.3625
															0.0902778	0.109589	0.433962				0.0777778	0.342857
															0.38835	0.333333	0.176991				0.0961538	0.107692
															0.134328	0.329412	0.307692				0.304348	0.324675
															0.228571	0.113924	0.769231				0.269231	0.15942
															0.0507246	0.393939	0.351351				0.378378	0.15873
															0.103093	0.362319	0.1875				0.42	0.533333
															0.175	0.368421	0.161017				0.375	0.163636
															0.625	0.689655	0.438597				0.28	0.176471
															0.308823	0.457627	0.382353				0.438597	0.363636
															0.0934579	0.321429	0.347222				0.615385	0.222222
															0.60396	0.225806	0.538462				0.131579	0.5
															0.09	0.205882	0.736842				0.390244	0.0222772
															0.274194	0.347826	0.0654206				0.375	0.304688
															0.464286	0.5	0.202532				0.592593	0.108571
															0.470588	0.233333	0.53125				0.304348	0.318182
															0.56	0.939394	0.18				0.25	0.107692
															0.117647	0.4	0.0952381				0.275	0.140496
															0.419355	0.419355	0.65625				0.119403	0.461539
															0.404255	0.259259	0.17284				0.310345	0.158879
															0.234043	0.380952	0.578947				0.225806	0.111111
															0.545455	0.347826	0.222222				0.826087	0.0784314
															0.355556	0.7	0.225806				0.636364	0.0547945
															0.35	0.106195	0.186047				0.213115	0.1125
															0.472222	0.310345	0.258064				0.6	0.0234114
															0.4	0.191083	0.291667				0.466667	0.0309734
															0.470588	0.62069	0.109375				0.233333	0.409091
															0.944444	0.666667	0.4375				0.0476191	0.0735294
															0.666667	0.112903	0.3				0.205882	0.0481928
															0.583333	0.702128	0.169491				0.235294	0.03
															0.269231	0.8	0.155172				0.186047	0.166667
															0.291667	0.671053	0.62069				0.25	0.0900901
															0.35	0.384615	0.127273				0.243243	0.126984
															0.347826	0.56	0.313725				0.444444	0.145833
															0.368421	0.133333	0.219512				0.136364	0.16129
															0.142857	0.2	0.5				0.0467836	0.205882
															0.128571	0.52381	0.291667				0.555556	0.28
															0.296296	0.740741	0.204082				0.269231	0.298077
															0.904762	0.0761905	0.25				0.314815	0.28
															0.0819672	0.196078	0.259259				0.179487	0.647059
															0.16129	0.437956	0.36				0.280702	0.08
															0.134021	0.291667	0.571429				0.545455	0.13924
															0.0325581	0.727273	0.3125				0.164179	0.0322581
															0.666667	0.430556	0.132076				0.870968	0.0909091
															0.229167	0.529412	0.114754				0.428571	0.0837438
															0.211765	0.0275689	0.425				0.142857	0.0694981
															0.173684	0.102941	0.0559441				0.304348	0.0188172
															0.344828	0.0887097	0.116233				0.205882	0.194444
															0.964286	0.552795	0.14876				0.473684	0.333333
															0.142857	0.072	0.298246				0.318182	0.170213
															0.347826	0.545455	0.091954				0.761905	0.0747663
															0.092437	0.352113	0.0296296				0.269231	0.34375
															0.509434	0.108333	0.230769				0.48	0.290323
															0.233333	0.347826	0.0437159				0.818182	0.46875
															0.333333	0.177778	0.275862				0.5	0.155556
															0.680851	0.261905	0.518518				0.333333	0.388889
															0.608696	0.75	0.0301003				0.4	0.0851852
															0.0894942	0.173913	0.233333				0.545455	0.608696
															0.0597015	0.229412	0.0864198				0.227273	0.195652
															0.28	0.0701754	0.431373				0.521739	0.216216
															0.314286	0.3	0.75				0.578947	0.28125
															0.159091	0.0843374	0.0419162				0.104478	0.277778
															0.3125	0.0677966	1				0.333333	0.327273
															0.147239	0.0472973	0.625				0.111111	0.25
															0.0977444	0.171171	0.0957447				0.155556	0.322581
															0.294643	0.3	0.3				0.106322	0.586207
															0.195122	0.166667	0.75				0.594595	0.230769
															0.196078	0.228571	0.0550964				0.25641	0.0486111
															0.157895	0.234568	0.220588				0.288461	0.131148
															0.358974	0.363636	0.363636				0.7	0.0879121
															0.318182	0.0412621	0.7				0.12069	0.0866142
															0.333333	0.476191	0.551724				0.461539	0.195652
															0.383333	0.25	0.105882				0.305556	0.580645
															0.952381	0.054878	0.0610687				0.0648148	0.0672646
															0.165138	0.0505051	0.25641				0.333333	0.208955
															0.142857	0.285714	0.114943				0.368421	0.306123
															0.309859	0.126866	0.0958904				0.190476	0.317073
															0.571429	0.534483	0.923077				0.158055	0.0517241
															0.0813954	0.329114	0.307692				0.727273	0.15873
															0.290323	0.675325	0.269231				0.5	0.0823529
															0.0824742	0.288461	0.0985916				0.320755	0.387755
															0.376812	0.183333	0.5				0.4375	0.0952381
															0.4375	0.28125	0.194444				0.5	0.21875
															0.538462	0.333333	0.0378378				0.535714	0.055336
															0.666667	0.0967742	0.114504				0.56	0.209302
															1	0.218935	0.184332				0.967742	0.25
															0.428571	0.152493	0.16				0.451613	0.5
															0.0992908	0.469388	0.217647				0.118644	0.0305085
															0.769231	0.261905	0.207921				0.268293	0.894737
															0.170732	0.212766	0.32				0.655172	0.419355
															0.0693069	0.6	0.576923				0.118852	0.388889
															0.444444	0.333333	0.333333				0.28125	1
															0.319149	0.4375	0.150376				0.0693069	0.259259
															0.431034	0.56	0.703704				0.380952	0.306123
															0.269231	0.210526	0.121884				0.2	0.5
															0.115646	0.958333	0.0848485				0.583333	0.34
															0.0708333	0.423077	0.717391				0.25	0.140625
															0.294118	0.368421	0.152174				0.52381	0.339286
															0.111111	0.193548	0.266667				0.0957447	0.027027
															0.119658	0.205882	0.0625				0.5	0.0509554
															0.0987654	0.368421	0.781818				0.241379	0.137931
															0.451613	0.121212	0.75				0.245509	0.266667
															0.121739	0.487805	0.545455				0.346154	0.233333
															0.233333	0.125	0.407895				0.333333	0.111111
															0.0576132	0.448276	0.084				0.785714	0.296296
															0.0956522	0.828283	0.0816327				0.927273	0.150943
															0.0588235	0.505155	0.772727				0.08	0.0892857
															0.6	0.258064	0.454545				0.219512	0.091954
															0.0892857	0.350877	0.194444				0.611111	0.269231
															0.119048	0.514563	0.333333				0.0486111	0.15873
															0.740741	0.309859	0.0466667				0.263158	0.18421
															0.0689655	0.290323	0.217391				0.318182	0.157895
															0.243243	0.254386	0.241379				0.36	0.410256
															0.894737	0.529412	0.392405				0.0875	0.339623
															0.722222	0.257143	0.190476				0.28	0.186047
															0.228571	0.461539	0.145161				0.173077	0.168478
															0.322581	0.333333	0.118644				0.0843374	0.714286
															0.339623	0.25	0.037234				0.177778	0.333333
															0.097561	0.121429	0.421053				0.352941	0.368421
															0.807692	0.106061	0.869565				0.363636	0.378378
															0.177778	0.175	0.104478				0.235294	0.0679612
															0.133333	0.6	0.241379				0.352941	0.136986
															0.0764706	0.134615	0.108108				0.714286	0.0735294
															0.166667	0.207792	0.0810811				0.625	0.0853658
															0.0581395	0.578947	0.431193				0.571429	0.225806
															0.162791	0.54902	0.368421				0.37037	0.403226
															0.190476	0.243243	0.0291667				0.40625	0.0932203
															0.0555556	0.0784314	0.615385				0.0421687	0.196078
															0.818182	0.388889	0.647059				0.306123	0.243902
															0.2	0.14	0.104				0.104478	0.30303
															0.298077	0.131148	0.454545				0.233333	0.057377
															0.774193	0.209302	0.215686				0.36	0.107914
															0.488372	0.423077	0.0625				0.238095	0.615385
															0.247863	0.0763359	0.930233				0.35	0.428571
															0.357143	0.486486	0.34				0.275862	0.206186
															0.0792079	0.035	0.0823529				0.482759	0.28
															0.125	0.5	0.0980392				0.314815	0.291667
															0.134615	0.428571	0.0628931				0.247706	0.123711
															0.109756	0.461539	0.617647				0.294118	0.217949
															0.325581	0.0441989	0.0386473				0.314286	0.6
															0.72	0.4	0.275				0.285714	0.277778
															0.106061	0.12069	0.333333				0.387097	0.0816327
															0.731707	0.0473373	0.931034				0.542857	0.205128
															0.134615	0.0876289	0.962963				0.538462	0.0736842
															0.210526	0.1	0.0434783				0.0930233	0.186813
															0.441177	0.363636	0.391304				0.296296	0.444444
															0.517241	0.56	0.129032				0.142857	0.2
															0.28	0.135714	0.238095				1	0.411765
															0.5	0.275862	0.0972973				0.166667	0.219512
															0.85	0.307692	0.258427				0.44898	0.242424
															0.310345	0.35	0.297753				0.208333	0.145833
															0.689655	0.166667	0.235294				0.235294	0.145833
															0.333333	0.391304	0.5				0.36	0.190476
															0.380952	0.768116	0.218182				0.6875	0.233333
															0.857143	0.454545	0.652174				0.333333	0.233333
															0.3	0.642857	0.216049				0.0769231	0.517241
															0.166667	0.290323	0.228188				0.816327	0.423077
															0.275862	0.333333	0.119048				0.45	0.304348
															0.142857	0.391304	0.7				0.269231	0.150376
															0.147541	0.12931	0.170543				0.319149	0.205882
															0.871429	0.304348	0.156028				0.119048	0.137255
															0.648649	0.177778	0.571429				0.128205	0.0432099
															0.1125	0.116667	0.0731707				0.625	0.0634921
															0.76	0.363636	0.431034				0.162791	0.305556
															0.458333	0.162791	0.714286				0.642857	0.190476
															0.393443	0.131148	0.217391				0.214286	0.122807
															0.219355	0.564103	0.0601504				0.243243	0.45
															0.153846	0.388889	0.5				0.138889	0.411765
															0.869565	0.14876	0.225806				0.464286	0.21875
															0.387097	0.538462	0.174603				0.307692	0.28
															0.1875	0.55	0.205882				0.466667	0.190476
															0.326923	0.333333	0.3				0.238938	0.340659
															0.318182	0.0747663	0.342857				0.105263	0.262295
															0.150376	0.257143	1				0.433962	0.0253165
															0.11	0.348837	0.225				0.25	0.217949
															0.136	0.338182	0.101266				0.619048	0.0923913
															0.271186	0.0714286	0.276596				0.136842	0.0368664
															0.318182	0.166667	0.666667				0.354839	0.233333
															0.1	0.762963	0.192983				0.625	0.35
															0.205128	0.0897833	0.181818				0.21875	0.0336135
															0.291667	0.2	0.21875				0.277778	0.101266
															0.727273	0.222222	0.128571				0.473684	0.0985916
															0.759259	0.149606	0.89				0.971429	0.195122
															0.681818	0.212389	0.0918367				0.4	0.210526
															0.0429448	0.595745	0.296296				0.368421	0.173913
															0.88	0.142857	0.210526				0.357143	0.28
															0.0909091	0.791667	0.5				0.380952	0.542857
															0.102273	0.484849	0.35				0.3125	0.0642202
															0.333333	0.0360825	0.225				0.290323	0.147208
															0.145833	0.444444	0.5				0.258064	0.134615
															0.175676	0.103175	0.583333				0.241379	0.357143
															0.337209	0.1875	0.425532				0.152174	0.175676
															0.0386266	0.175	0.633333				0.177778	0.175
															0.139014	0.204545	0.423077				0.444444	0.333333
															0.774193	0.265957	0.486486				0.473684	0.128205
															0.573333	0.770833	0.144927				0.321429	0.36
															0.0592105	0.265896	0.35				0.75	0.259259
															0.0921053	0.402174	0.431034				0.291667	0.225806
															0.514286	0.12963	0.333333				0.84	0.0490196
															0.372549	0.5	0.307692				0.583333	0.333333
															0.594595	0.108434	0.961538				0.291667	0.321429
															0.0276074	0.521739	1				0.454545	0.163934
															0.0888889	0.251748	0.590909				0.368421	0.0982659
															0.638889	0.382609	0.46875				0.25	0.0469799
															1	0.335195	0.333333				0.241379	0.0909091
															0.293333	0.212121	0.533333				0.0454546	0.344828
															0.178378	0.318182	0.433333				0.598485	0.344828
															0.137255	0.217391	0.241379				0.31746	0.212121
															0.217391	0.516129	0.68				0.271605	0.225806
															0.144695	0.344828	0.318182				0.6	0.793103
															0.0731707	1	0.235294				0.52381	0.304348
															0.134259	0.137255	0.230769				0.488372	0.535714
															0.588235	0.368421	0.0777778				0.266667	0.210526
															1	0.132076	0.0777778				0.660714	0.258064
															0.18421	0.43662	0.014862				0.157407	0.380952
															0.382353	0.210526	0.022				0.162162	0.194444
															0.25641	0.125	0.04				0.0752688	0.153846
															0.827586	0.605839	0.0375				0.2	0.5
															0.119403	0.139706	0.0617977				0.241379	0.555556
															0.476191	0.310345	0.736842				0.0867052	0.0286738
															0.183333	0.785714	0.433962				0.0588235	0.0693069
															0.842105	0.324675	0.28125				0.385965	0.291667
															0.105263	0.529412	0.0891089				0.0990099	0.310345
															0.820513	0.928571	0.026738				0.241379	0.243902
															0.666667	0.36	0.204819				0.542857	0.0460526
															0.375	0.419753	0.107692				0.25	0.0603448
															0.85	0.170732	0.575				0.205882	0.268293
															0.275862	0.458333	0.333333				0.802817	1
															0.148649	0.388626	0.300813				0.55	0.0386473
															0.04	0.198198	0.0227273				0.291667	0.189189
															0.0842105	0.153846	1				0.212766	0.190476
															0.159091	0.201835	0.708333				0.150685	0.114754
															0.180556	0.0714286	0.721739				0.180328	0.0478723
															0.179487	0.295082	0.22				0.275	0.0182186
															0.382353	0.181818	0.105634				0.52	0.240876
															0.125	0.104167	0.0302376				0.153846	0.0754717
															0.166667	0.692308	0.517241				0.252747	0.170732
															0.1	0.612245	0.364583				0.344828	0.107692
															0.0769231	1	0.488372				0.13913	0.101449
															0.346154	0.684211	0.0852713				0.277778	0.407407
															0.3125	0.0909091	0.5625				0.390244	0.141414
															0.0707071	0.405941	0.148936				0.536585	0.170732
															0.236364	0.885714	0.730769				0.296296	0.371429
															0.32	0.588235	0.248649				0.101266	0.197368
															0.11236	0.203704	0.625				0.164384	0.619048
															0.511364	0.318182	0.225806				0.222222	0.125
															0.344828	1	0.149425				0.111111	0.0752212
															0.62963	0.685714	0.145833				0.563636	0.361111
															0.064	0.525253	0.0915033				0.345454	0.0930233
															0.10219	0.321429	0.0422961				0.517241	0.367521
															0.113208	0.471429	0.127273				0.409091	0.321429
															0.2	0.15625	0.592593				0.269231	0.476191
															0.0603448	0.727273	0.4				0.45946	0.28
															0.194175	0.357143	0.0954774				0.666667	0.0833333
															0.233333	0.482759	0.191489				0.125	0.35
															0.625	0.38	0.226667				0.511628	0.0204082
															0.25	0.9	0.122807				0.628571	0.167939
															0.318182	0.212121	0.137255				0.304348	0.333333
															0.202128	0.48	0.108434				0.578947	0.0972222
															0.478261	0.3	0.075				0.216867	0.230769
															0.266667	0.588235	0.18421				0.4	0.310345
															0.364486	0.346154	0.103896				0.444444	0.294118
															0.352941	1	0.456				0.235294	0.37931
															0.394286	0.391892	0.55				0.888889	0.153846
															1	0.468354	0.604651				0.37037	0.333333
															0.135593	0.325581	0.347826				0.818182	0.311111
															0.694915	0.730769	0.189189				0.381818	0.672131
															0.112426	0.561798	0.0988593				0.904762	0.060241
															0.923077	0.369863	0.309278				0.241379	0.588235
															0.45614	0.444444	0.0909091				0.16	0.0672269
															0.0657895	0.717949	0.0754717				0.758621	0.5
															0.666667	0.72	0.440678				0.368421	0.297521
															0.0633803	0.0740741	0.318182				0.2	0.157025
															0.823529	0.0920502	0.139535				0.242424	0.024055
															0.366667	0.20339	0.150943				0.318182	0.256198
															0.079646	0.38806	0.272727				0.363636	0.296296
															0.0841121	0.612903	0.0567376				0.409091	0.714286
															0.304348	0.0878661	0.2				0.411765	0.232558
															0.186047	0.6875	0.121094				0.619048	0.341463
															0.347826	0.689655	0.258064				0.2	0.15625
															0.28125	0.125786	0.707692				0.217391	0.0730337
															0.444444	0.519231	0.864865				0.944444	0.322581
															0.84	0.7	0.261539				0.302326	0.273381
															0.783784	0.733333	0.136364				0.645833	0.151786
															0.3125	0.333333	0.0575916				0.625	0.243243
															0.506667	0.163265	0.0762712				0.205882	0.52809
															0.31579	0.0787402	0.318182				0.1875	0.295775
															0.277778	0.258064	0.361111				0.375	0.106061
															0.515151	0.857143	0.0732984				0.318182	0.894737
															0.492537	0.0949721	0.521739				0.53125	0.434783
															0.294118	0.154639	0.46				0.309859	0.551724
															0.307692	0.25	0.588235				0.243243	0.270833
															0.444444	0.0892857	0.318182				0.155556	0.205882
															0.71875	0.27027	0.244681				0.195122	0.0780488
															0.145833	0.606061	0.32				0.28	0.466667
															0.235294	0.291667	0.114754				0.475	0.135593
															0.95	0.307692	0.434783				0.533333	0.170732
															0.269231	0.0769231	0.0618182				0.28	0.111524
[truncated: 3,292 more rows]
