# Supplementary material for: Concerted action of kinesins KIF5B and KIF13B promotes efficient secretory vesicle transport to microtubule plus ends
Source: eLife. 2020 Nov 11;9:e61302. doi: 10.7554/eLife.61302 (PMC7710357; doi:10.7554/eLife.61302)
Supplement: Figure 3—figure supplement 1—source data 1. [file elife-61302-fig3-figsupp1-data1.xlsx]

## Sheet: Figure 3 - Figure supplement 1A
Figure 3 - Figure supplement 1A
	Manual				Automated
		Histogram				Histogram
	Speed (mm/s)	Bin center	%		Speed (mm/s)	Bin center	%
	1.8398	0.05	0		2.121	0.05	0
	1.0101	0.15	0		1.032	0.15	0
	1.9914	0.25	0		0.897	0.25	0
	0.8441	0.35	0		1.567	0.35	0
	2.7274	0.45	0.9756		1.136	0.45	0
	2.8572	0.55	0.9756		0.837	0.55	0.4946
	1.2987	0.65	2.439		1.307	0.65	1.7312
	1.8398	0.75	4.878		0.974	0.75	3.1327
	1.8398	0.85	5.8537		1.111	0.85	7.7494
	0.7576	0.95	10.7317		1.659	0.95	7.5845
	1.8182	1.05	13.1707		1.062	1.05	11.4592
	0.6803	1.15	11.2195		1.42	1.15	13.4378
	0.4545	1.25	15.122		1.057	1.25	13.85
	0.6494	1.35	7.8049		0.843	1.35	10.6348
	0.4383	1.45	4.878		1.15	1.45	7.9967
	0.974	1.55	5.3659		1.209	1.55	5.6059
	0.6981	1.65	3.4146		1.207	1.65	4.6167
	0.9091	1.75	1.9512		1.164	1.75	2.1434
	1.0204	1.85	2.9268		1.045	1.85	1.6488
	0.9957	1.95	1.4634		0.93	1.95	1.5664
	1.4069	2.05	0.9756		2.111	2.05	1.0717
	1.0958	2.15	0		1.289	2.15	1.6488
	1.8482	2.25	1.9512		1.487	2.25	0.4946
	0.8813	2.35	0.9756		1.813	2.35	0.4946
	1.2059	2.45	0		2.174	2.45	0.4122
	1.2266	2.55	0		0.854	2.55	0.5771
	1.0989	2.65	0		1.612	2.65	0.3298
	0.938	2.75	0.9756		1.289	2.75	0.4946
	0.974	2.85	0.4878		1.716	2.85	0.2473
	1.0582	2.95	1.4634		1.684	2.95	0
	0.9445	3.05	0		1.884	3.05	0.1649
	0.8265	3.15	0		1.081	3.15	0.1649
	1.0714	3.25	0		2.029	3.25	0.1649
	1.0036	3.35	0		2.348	3.35	0
	0.8785	3.45	0		1.653	3.45	0
	0.974	3.55	0		1.635	3.55	0.0824
	1.3709	3.65	0		1.297	3.65	0
	1.0668	3.75	0		1.129	3.75	0
	0.9642	3.85	0		1.446	3.85	0
	0.974	3.95	0		1.246	3.95	0
	1.214	4.05	0		1.289	4.05	0
	1.2662	4.15	0		1.118	4.15	0
	1.0534	4.25	0		1.271	4.25	0
	1.5151	4.35	0		1.434	4.35	0
	0.9199	4.45	0		0.546	4.45	0
	1.1102	4.55	0		1.238	4.55	0
	0.9599	4.65	0		0.634	4.65	0
	1.2397	4.75	0		0.712	4.75	0
	1.0036	4.85	0		1.486	4.85	0
	1.5984	4.95	0		1.3	4.95	0
	1.0582	5.05	0		1.226	5.05	0
	1.1644	5.15	0		1.245	5.15	0
	1.4147	5.25	0		1.199	5.25	0
	1.3219	5.35	0		1.438	5.35	0
	1.3312	5.45	0		1.013	5.45	0
	0.8441	5.55	0		1.313	5.55	0
	1.4286	5.65	0		1.976	5.65	0
	0.8929	5.75	0		1.049	5.75	0
	1.1293	5.85	0		1.036	5.85	0
	1.3296	5.95	0		1.144	5.95	0
	1.2987	6.05	0		1.057	6.05	0
	1.2176	6.15	0		1.256	6.15	0
	1.0204	6.25	0		0.847	6.25	0
	1.1459	6.35	0		1.202	6.35	0
	0.9605	6.45	0		1.105	6.45	0
	1.0065	6.55	0		1.338	6.55	0
	0.6494	6.65	0		2.142	6.65	0
	1.3709	6.75	0		1.414	6.75	0
	1.6234	6.85	0		0.851	6.85	0
	1.7316	6.95	0		1.391	6.95	0
	1.2605	7.05	0		0.971	7.05	0
	1.2176	7.15	0		0.789	7.15	0
	1.7046	7.25	0		1.449	7.25	0
	1.1544	7.35	0		0.861	7.35	0
	1.0552	7.45	0		1.613	7.45	0
	1.1544	7.55	0		1.584	7.55	0
	1.3577	7.65	0		1.429	7.65	0
	1.039	7.75	0		0.549	7.75	0
	1.0253	7.85	0		1.173	7.85	0
	0.5647	7.95	0		0.885	7.95	0
	1.0822	8.05	0		0.976	8.05	0
	0.7576	8.15	0		0.946	8.15	0
	0.9445	8.25	0		1.197	8.25	0
	1.5909	8.35	0		1.135	8.35	0
	0.992	8.45	0		1.656	8.45	0
	1.5721	8.55	0		1.094	8.55	0
	1.175	8.65	0		0.685	8.65	0
	1.5151	8.75	0		1.355	8.75	0
	1.1132	8.85	0		1.514	8.85	0
	0.8991	8.95	0		1.323	8.95	0
	2.2186	9.05	0		1.411	9.05	0
	2.7596	9.15	0		1.078	9.15	0
	2.2077	9.25	0		1.114	9.25	0
	1.162	9.35	0		1.304	9.35	0
	2.987	9.45	0		1.219	9.45	0
	1.6234	9.55	0		1.142	9.55	0
	1.948	9.65	0		1.162	9.65	0
	1.4843	9.75	0		1.11	9.75	0
	2.013	9.85	0		1.102	9.85	0
	2.3023	9.95	0		1.299	9.95	0
	1.2987				0.869
	1.2605				0.826
	2.2077				0.923
	2.922				0.66
	0.8441				1.939
	0.7792				1.572
	0.9139				1.342
	1.1841				1.063
	1.2987				2.189
	1.2662				1.137
	1.4843				1.386
	2.013				1.16
	2.3023				1.192
	1.2987				1.611
	1.2605				1.211
	2.2077				1.387
	2.922				1.563
	0.8441				0.723
	0.7792				1.005
	0.9139				1.145
	1.1841				1.155
	1.2987				1.072
	1.2662				1.422
	1.0552				1.311
	0.9199				1.499
	0.7257				0.989
	1.0253				1.621
	0.509				0.856
	1.1806				1.554
	1.4205				1.244
	1.7161				1.183
	1.1255				1.043
	1.0204				0.978
	1.1077				1.206
	0.7969				1.386
	1.0281				1.123
	1.6883				1.766
	1.7161				1.312
	1.2987				1.145
	1.3282				1.39
	0.974				1.69
	1.3915				1.225
	1.1806				1.234
	1.3637				1.139
	1.1077				1.297
	1.1595				0.946
	1.4224				1.233
	1.2987				0.925
	1.2032				1.21
	1.6529				0.982
	1.2987				0.89
	1.2987				1.54
	1.2059				1.102
	1.3369				1.267
	1.2987				1.546
	1.2987				1.05
	1.5151				1.029
	1.1948				1.056
	1.5939				0.771
	1.1988				2.175
	1.3766				1.625
	0.9931				1.03
	1.3486				0.685
	1.0204				0.917
	0.6494				0.996
	1.0626				1.022
	1.2987				0.977
	0.7421				0.742
	0.7421				1.216
	1.1988				1.304
	0.796				2.51
	1.4167				1.039
	0.974				1.035
	0.8752				0.902
	0.8523				1.972
	1.3348				1.541
	1.0524				1.091
	0.7084				0.868
	1.1544				0.844
	1.1595				1.561
	1.3312				1.069
	1.0524				1.026
	1.1255				1.143
	1.6234				1.112
	1.5873				1.194
	1.8669				1.158
	1.973				1.184
	1.4611				1.41
	1.6425				1.481
	1.4107				1.563
	1.2102				2.844
	1.3915				1.24
	0.974				1.341
	1.5037				1.568
	0.999				1.419
	1.3709				1.064
	1.2662				0.923
	1.039				1.398
	1.2176				0.994
	1.5513				1.032
	1.2987				1.274
	1.6465				1.4
	1.0695				1.055
	1.5545				0.927
	0.8523				2.307
					1.527
					1.66
					1.424
					2.43
					1.593
					0.921
					0.915
					2.094
					2.517
					1.332
					1.103
					0.755
					0.786
					1.203
					0.992
					0.966
					1.108
					1.011
					1.235
					1.093
					1.158
					1.469
					1.2
					0.875
					0.879
					1.94
					1.463
					1.99
					1.32
					1.945
					0.701
					1.382
					1.643
					1.388
					1.609
					0.801
					1.087
					1.248
					1.219
					0.922
					1.584
					1.06
					1.008
					1.071
					1.43
					1.418
					1.323
					1.054
					1.462
					1.34
					1.02
					0.858
					1.493
					1.335
					0.588
					1.043
					0.989
					1.475
					0.736
					1.109
					1.092
					0.943
					1.375
					0.906
					1.31
					1.061
					1.511
					1.366
					0.986
					0.924
					1.566
					1.19
					1.029
					0.887
					1.174
					1.449
					1.373
					0.987
					1.366
					1.359
					0.863
					1.603
					1.222
					0.75
					0.893
					1.036
					0.876
					1.17
					1.336
					1.456
					1.036
					1.725
					1.118
					1.274
					1.23
					1.058
					0.895
					1.259
					1.145
					1.225
					1.016
					1.167
					1.33
					0.938
					1.051
					1.394
					1.755
					1.264
					1.476
					1.297
					1.165
					1.233
					1.119
					1.283
					1.265
					0.998
					1.433
					2.478
					1.177
					1.331
					0.82
					1.076
					1.19
					1.624
					2.093
					0.631
					1.171
					1.447
					1.281
					1.14
					1.173
					0.938
					0.857
					1.207
					1.243
					1.279
					1.208
					0.957
					1.041
					1.527
					1.283
					1.339
					1.677
					2.518
					1.361
					1.257
					2.059
					1.286
					0.814
					1.383
					1.279
					1.204
					1.117
					1.077
					2.418
					1.1
					1.326
					1.227
					1.034
					1.765
					1.207
					2.748
					1.217
					1.617
					1.493
					1.567
					2.429
					2.077
					0.938
					1.305
					1.09
					2.638
					1.216
					2.182
					0.949
					0.905
					1.695
					1.943
					2.288
					1.256
					2.27
					2.549
					2.103
					1.647
					0.828
					1.639
					1.542
					1.087
					0.824
					0.903
					1.112
					1.532
					0.801
					1.498
					1.51
					1.785
					1.004
					1.099
					2.112
					1.079
					2.054
					1.459
					1.217
					1.269
					2.798
					1.374
					1.798
					1.596
					0.614
					1.33
					1.107
					1.123
					1.146
					1.232
					1.614
					1.462
					1.392
					1.213
					1.547
					1.539
					1.622
					1.239
					2.2
					2.177
					2.755
					1.379
					1.324
					3.132
					1.744
					1.54
					1.166
					1.151
					1.219
					1.675
					1.817
					2.549
					1.333
					1.071
					1.299
					0.807
					1.948
					1.518
					1.964
					1.254
					0.87
					1.566
					1.291
					1.197
					1.024
					1.088
					1.423
					1.242
					1.31
					1.403
					1.218
					0.903
					0.958
					2.383
					3.278
					0.806
					0.867
					0.635
					0.798
					1.12
					1.456
					1.204
					0.772
					1.175
					0.799
					1.566
					1.132
					1.683
					2.158
					1.088
					0.893
					1.306
					1.633
					2.76
					0.868
					1.304
					1.307
					0.859
					0.644
					0.587
					0.786
					1.037
					1.07
					1.381
					1.238
					1.477
					1.609
					1.338
					1.421
					1.275
					0.945
					1.232
					1.622
					1.759
					0.939
					1.121
					0.902
					0.954
					0.929
					0.795
					1.398
					1.319
					1.042
					1.071
					1.157
					1.111
					1.122
					0.766
					1.286
					1.175
					1.119
					1.01
					0.941
					1.59
					1.213
					0.88
					1.254
					1.173
					1.039
					1.427
					1.441
					1.538
					0.827
					1.178
					0.813
					1.169
					1.35
					1.444
					1.129
					1.241
					1.71
					1.073
					1.816
					1.51
					1.073
					1.128
					1.234
					1.271
					1.107
					1.314
					1.252
					0.835
					0.722
					1.525
					1.493
					0.663
					0.825
					0.976
					0.7
					0.966
					0.592
					0.894
					0.895
					0.759
					0.795
					1.346
					0.747
					0.846
					0.75
					1.61
					1.179
					1.826
					0.679
					1.827
					1.104
					1.129
					1.164
					1.522
					1.294
					1.743
					1.545
					1.688
					0.875
					1.436
					0.908
					0.923
					1.256
					1.438
					1.541
					1.501
					1.374
					1.291
					1.219
					1.539
					1.291
					1.344
					0.963
					0.745
					0.999
					0.923
					1.034
					1.4
					1.193
					1.214
					0.823
					1.178
					1.525
					1.039
					1.026
					1.278
					1.499
					0.99
					1.43
					1.355
					0.687
					1.469
					0.956
					1.067
					1.252
					1.46
					1.408
					1.256
					0.703
					1.24
					1.24
					1.299
					1.022
					1.263
					1.866
					1.502
					1.169
					0.863
					1.198
					0.891
					1.684
					1.388
					1.438
					1.159
					1.019
					1.304
					1.303
					1.111
					0.866
					2.033
					0.901
					1.574
					1.102
					1.002
					1.178
					1.189
					1.402
					0.768
					0.83
					1.214
					0.698
					1.611
					1.196
					1.064
					0.946
					1.43
					1.007
					0.875
					1.109
					1.237
					1.962
					1.361
					1.84
					1.684
					1.599
					0.912
					1.187
					1.453
					1.381
					1.508
					0.975
					1.386
					0.966
					1.181
					1.017
					1.406
					1.059
					1.031
					1.196
					0.865
					1.355
					1.596
					1.128
					1.498
					1.38
					0.771
					0.878
					0.727
					1.505
					1.174
					0.897
					1.165
					1.175
					0.877
					1.008
					1.173
					2.168
					2.112
					1.268
					1.255
					0.808
					1.03
					1.194
					1.462
					1.041
					1.122
					1.076
					1.436
					1.397
					1.306
					1.226
					1.135
					1.187
					0.815
					0.849
					1.067
					0.636
					1.751
					1.362
					1.441
					1.018
					1.602
					1.259
					0.878
					1.171
					0.92
					1.418
					1.254
					1.62
					1.151
					1.914
					1.569
					1.054
					1.09
					1.335
					1.334
					0.945
					0.835
					1.15
					0.848
					1.249
					1.334
					1.188
					0.947
					0.716
					1.342
					1.292
					1.246
					1.567
					2.221
					1.17
					1.118
					1.168
					0.765
					2.664
					1.234
					0.679
					1.223
					1.342
					1.588
					1.593
					1.337
					1.037
					1.415
					1.383
					1.018
					0.818
					2.625
					1.286
					1.64
					0.996
					1.061
					0.708
					1.958
					1.602
					2.682
					1.151
					2.096
					1.111
					1.028
					1.474
					0.99
					1.418
					0.727
					1.429
					1.213
					0.821
					1.061
					1.307
					1.187
					1.052
					1.213
					1.181
					1.098
					1.904
					1.605
					1.393
					1.598
					0.866
					1.231
					1.33
					1.074
					1.478
					0.686
					2.497
					1.088
					0.82
					1.372
					1.075
					1.064
					1.385
					1.105
					1.684
					1.301
					0.885
					1.725
					2.569
					1.208
					0.908
					1.965
					1.091
					1.256
					1.231
					1.192
					1.1
					0.853
					0.732
					0.832
					1.073
					0.936
					0.815
					1.062
					1.191
					1.086
					1.372
					0.9
					1.733
					1.271
					1.063
					1.112
					0.998
					0.904
					1.399
					1.534
					1.832
					1.208
					1.973
					1.529
					1.719
					1.225
					2.043
					0.801
					1.121
					1.186
					1.029
					1.088
					1.283
					1.508
					1.252
					1.238
					1.648
					1.093
					1.773
					1.322
					1.245
					1.488
					1.272
					0.971
					1.033
					1.432
					3.202
					0.926
					0.881
					1.15
					1.264
					1.31
					1.377
					1.388
					1.087
					0.891
					1.365
					1.396
					1.134
					1.25
					1.257
					1.27
					1.198
					1.166
					1.224
					1.247
					1.249
					1.041
					2.189
					1.3
					1.483
					1.332
					1.193
					0.966
					1.127
					1.264
					0.97
					1.156
					0.746
					1.052
					0.822
					0.979
					0.567
					2.738
					1.365
					1.427
					0.977
					1.303
					1.479
					1.675
					1.407
					1.313
					0.851
					2.142
					1.051
					0.833
					1.201
					0.931
					1.338
					1.45
					1.102
					1.367
					1.42
					1.101
					1.269
					1.351
					0.804
					1.106
					1.154
					0.964
					1.209
					0.729
					0.812
					1.274
					1.312
					2.739
					1.24
					1.409
					1.193
					1.09
					1.166
					1.812
					0.861
					1.304
					0.835
					1.218
					1.638
					0.946
					1.444
					0.988
					1.176
					1.602
					0.85
					0.634
					1.096
					1.012
					0.712
					0.637
					1.231
					2.86
					1.314
					0.995
					1.101
					1.881
					1.698
					1.326
					1.719
					1.286
					1.368
					1.349
					1.709
					1.259
					1.73
					1.149
					1.057
					1.174
					1.365
					0.952
					1.138
					1.176
					1.308
					1.651
					2.17
					2.277
					3.57
					1.415
					1.261
					0.88
					1.571
					1.414
					1.115
					1.564
					1.591
					1.402
					1.502
					1.946
					1.827
					2.372
					2.105
					1.825
					1.467
					1.407
					0.705
					1.19
					1.317
					0.768
					1.331
					1.524
					1.25
					1.31
					1.227
					1.373
					1.096
					1.484
					1.548
					0.897
					1.262
					1.842
					2.044
					1.699
					1.129
					1.722
					1.463
					1.178
					1.061
					1.319
					0.872
					1.074
					2.04
					1.99
					1.416
					1.214
					1.256
					1.161
					1.115
					0.87
					1.389
					1.544
					1.592
					1.141
					1.274
					1.264
					0.934
					1.62
					3.015
					1.186
					1.073
					1.555
					1.149
					0.81
					0.846
					1.122
					1.448
					1.71
					0.603
					0.99
					0.96
					2.899
					1.806
					2.084
					1.142
					1.178
					0.611
					1.425
					1.176
					1.474
					1.295
					0.869
					1.361
					1.487
					1.022
					1.612
					1.41
					1.225
					1.737
					1.567
					2.54
					1.393
					1.266
					1.159
					1.023
					1.654
					1.126
					1.287
					1.19
					1.427
					1.205
					1.106
					1.137
					1.321
					1.124
					2.07
					1.771
					1.047
					1.019
					1.376
					1.08
					1.458
					1.628
					1.271
					1.092
					1.377
					1.495
					1.003
					0.975
					1.126
					1.162
					1.952
					0.829
					0.888
					1.076
					0.976
					1.405
					1.157
					1.078
					1.292
					1.204
					1.061
					3.025
					1.691
					1.298
					1.056
					0.794
					1.045
					1.262
					1.34
					0.888
					1.042
					1.317
					1.003
					1.296
					1.408
					1.303
					1.66
					1.345
					2.238
					1.097
					1.525
					1.257
					1.248
					1.287
					1.543
					1.591
					0.903
					1.362
					2.338
					1.705
					1.041
					1.441
					1.34
					1.266
					1.339
					1.877
					1.054
					0.963
					1.477
					1.062
					1.774
					1.75
					1.195
					1.474
					1.515
					2.224
					1.269
					0.829
					1.078
					1.348
					1.435
					0.727
					0.973
					0.881
					0.927
					1.219
					1.3
					1.452
					1.888
					1.281
					1.805
					2.349
					0.944
					0.83
					1.236
					1.174
					0.967
					1.492
					1.834
					2.184
					1.069
					0.667
					1.201
					1.631
					1.512
					0.878
					1.638
					2.128
					3.177
					1.924
					1.047
					1.279
					1.118
					1.323
					1.681
					1.685
					1.841
					1.269
					1.367

## Sheet: Figure 3 - Figure supplement 1B
Figure 3 - Figure supplement 1B
	Velocity																									Duration
	Control				KIF13B-KO				KIF13B-KO mixed				KIF5B-KO				KIF5B/KIF13B-KO				4X-KO					Control				KIF13B-KO				KIF13B-KO mixed				KIF5B-KO				KIF5B/KIF13B-KO				4X-KO
		Histogram				Histogram				Histogram				Histogram				Histogram				Histogram					Histogram				Histogram				Histogram				Histogram				Histogram				Histogram
	Speed (mm/s)	Bin center	%		Speed (mm/s)	Bin center	%		Speed (mm/s)	Bin center	%		Speed (mm/s)	Bin center	%		Speed (mm/s)	Bin center	%		Speed (mm/s)	Bin center	%			Duration (s)	Bin center	%		Duration (s)	Bin center	%		Duration (s)	Bin center	%		Duration (s)	Bin center	%		Duration (s)	Bin center	%		Duration (s)	Bin center	%
	2.121	0.05	0		1.069	0.05	0		0.902	0.05	0		1.897	0.05	0		0.765	0.05	0		1.645	0.05	0			1.1	0.1	0		0.8	0.1	0		0.6	0.1	0		0.7	0.1	0		0.7	0.1	0		0.6	0.1	0
	1.032	0.15	0		1.619	0.15	0.015		0.95	0.15	0		1.684	0.15	0		1.719	0.15	0		3.829	0.15	0			0.7	0.3	0		1	0.3	0		0.9	0.3	0		1.1	0.3	0		0.8	0.3	0		0.7	0.3	0
	0.897	0.25	0		1.076	0.25	0		0.911	0.25	0		1.692	0.25	0		3.217	0.25	0		2.122	0.25	0			0.7	0.5	24.4964		1.1	0.5	24.6483		0.6	0.5	26.7822		1.6	0.5	25.1129		1	0.5	28.7129		0.6	0.5	27.3906
	1.567	0.35	0		1.655	0.35	0		0.879	0.35	0.0122		1.447	0.35	0		2.063	0.35	0		1.694	0.35	0			0.7	0.7	31.2579		0.6	0.7	29.6468		0.7	0.7	31.6772		0.6	0.7	29.2325		1.2	0.7	29.5615		1.3	0.7	30.47
	1.136	0.45	0.0282		1.325	0.45	0		1.263	0.45	0.0854		0.534	0.45	0.1129		3.383	0.45	0		2.924	0.45	0			0.9	0.9	16.5235		1.4	0.9	17.3152		0.7	0.9	17.3584		0.6	0.9	16.3657		0.7	0.9	15.5587		2.1	0.9	13.7763
	0.837	0.55	0.4085		1.215	0.55	0.2544		1.202	0.55	0.6958		1.251	0.55	0.2822		2.264	0.55	0.8487		0.969	0.55	0.1621			0.6	1.1	9.8183		2.2	1.1	9.7725		0.6	1.1	9.7168		0.6	1.1	10.3837		0.7	1.1	8.9109		0.6	1.1	9.7245
	1.307	0.65	1.4227		1.41	0.65	0.9728		1.13	0.65	1.9409		1.906	0.65	0.8465		1.81	0.65	1.5559		2.031	0.65	1.1345			0.7	1.3	6.4094		1	1.3	6.1808		0.9	1.3	5.1758		2.1	1.3	6.772		1.3	1.3	5.5163		1.1	1.3	6.8071
	0.974	0.75	2.9018		0.717	0.75	2.9033		1.424	0.75	3.7842		1.495	0.75	1.3544		1.983	0.75	1.8388		1.68	0.75	2.107			0.7	1.5	2.3102		0.7	1.5	2.4993		0.6	1.5	1.7822		0.8	1.5	1.8623		1.3	1.5	1.6973		1.3	1.5	1.1345
	1.111	0.85	5.5642		1.482	0.85	5.1332		1.587	0.85	6.25		1.607	0.85	2.088		2.361	0.85	3.3946		1.875	0.85	2.5932			0.9	1.7	3.1695		0.7	1.7	3.2625		1	1.7	2.6245		1	1.7	2.8781		0.7	1.7	2.6874		0.6	1.7	2.4311
	1.659	0.95	7.6912		0.674	0.95	7.5127		1.377	0.95	9.4604		1.772	0.95	3.6117		1.4	0.95	3.5361		3.651	0.95	3.8898			0.8	1.9	1.8594		0.6	1.9	2.0054		0.7	1.9	1.6602		1.1	1.9	2.7652		2.1	1.9	2.2631		0.8	1.9	2.9173
	1.062	1.05	10.4099		1.445	1.05	11.6432		0.786	1.05	12.3169		2.06	1.05	3.2167		2.167	1.05	4.8091		0.935	1.05	3.7277			0.6	2.1	1.3241		0.6	2.1	1.5115		0.8	2.1	1.2207		3.4	2.1	1.5801		0.8	2.1	1.1315		0.8	2.1	1.6207
	1.42	1.15	12.7905		1.327	1.15	13.499		0.809	1.15	12.9639		1.833	1.15	4.2889		1.146	1.15	5.5163		1.307	1.15	2.9173			1.1	2.3	1.296		1.1	2.3	1.287		0.6	2.3	1.0132		0.7	2.3	1.1287		0.6	2.3	2.2631		0.6	2.3	1.7828
	1.057	1.25	12.8469		2.11	1.25	14.4418		0.932	1.25	13.4521		1.948	1.25	3.9503		1.698	1.25	3.9604		1.632	1.25	5.1864			0.6	2.5	0.5212		0.8	2.5	0.6136		0.6	2.5	0.3418		1.1	2.5	0.5079		0.7	2.5	0.2829		1.6	2.5	0.4862
	0.843	1.35	11.8467		1.043	1.35	13.7384		1.316	1.35	11.9629		2.301	1.35	5.3612		1.316	1.35	6.2235		0.888	1.35	3.7277			0.8	2.7	0.2958		0.6	2.7	0.3292		0.7	2.7	0.2686		0.8	2.7	0.5079		0.9	2.7	0.4243		0.8	2.7	0.1621
	1.15	1.45	8.6209		2.416	1.45	10.416		0.665	1.45	9.4971		1.785	1.45	4.2325		1.753	1.45	5.6577		2.538	1.45	4.5381			0.7	2.9	0.2113		0.8	2.9	0.3292		0.6	2.9	0.1099		1.3	2.9	0.2257		0.9	2.9	0.2829		1	2.9	0
	1.209	1.55	6.5784		1.066	1.55	6.5849		1.037	1.55	6.1401		2.212	1.55	4.1196		1.714	1.55	5.5163		1.018	1.55	3.4036			1.6	3.1	0.0845		0.6	3.1	0.1197		0.6	3.1	0.0488		0.7	3.1	0.0564		0.7	3.1	0.1414		0.7	3.1	0.6483
	1.207	1.65	4.4091		1.431	1.65	3.7713		1.254	1.65	4.1504		1.317	1.65	6.2077		2.475	1.65	4.8091		1.881	1.65	3.5656			1.4	3.3	0.0845		0.8	3.3	0.0898		1.5	3.3	0.0488		2.1	3.3	0.2822		0.6	3.3	0		0.8	3.3	0
	1.164	1.75	3.254		1.103	1.75	2.1251		1.186	1.75	2.1118		1.174	1.75	5.4176		1.215	1.75	5.0919		2.331	1.75	1.9449			1.6	3.5	0.0986		0.6	3.5	0.1048		0.6	3.5	0.061		0.7	3.5	0.1693		0.6	3.5	0.1414		0.6	3.5	0.3241
	1.045	1.85	2.3102		1.655	1.85	1.6312		1.191	1.85	1.3184		1.162	1.85	5.9819		1.341	1.85	4.8091		1.611	1.85	3.5656			1.2	3.7	0.0282		0.6	3.7	0.0748		1.1	3.7	0.0488		1	3.7	0.1129		1.2	3.7	0.2829		1.7	3.7	0
	0.93	1.95	1.9158		1.186	1.95	1.0027		0.976	1.95	0.9277		1.257	1.95	5.1919		1.793	1.95	3.3946		2.587	1.95	3.0794			0.8	3.9	0.0704		0.6	3.9	0.015		0.7	3.9	0.0122		0.8	3.9	0		0.7	3.9	0		1.3	3.9	0.1621
	2.111	2.05	1.5918		1.493	2.05	0.7932		0.948	2.05	0.5615		1.053	2.05	5.3612		1.264	2.05	4.9505		2.45	2.05	4.5381			1.3	4.1	0.0563		1.4	4.1	0		1.4	4.1	0.0122		0.7	4.1	0		0.9	4.1	0.1414		0.8	4.1	0.1621
	1.289	2.15	1.141		0.986	2.15	0.6136		1.039	2.15	0.3052		1.319	2.15	5.5305		4.036	2.15	3.2532		0.763	2.15	5.8347			1	4.3	0.0282		0.6	4.3	0.0748		0.8	4.3	0.0122		0.8	4.3	0		0.6	4.3	0		0.6	4.3	0
	1.487	2.25	0.817		1.605	2.25	0.434		1.101	2.25	0.5127		1.777	2.25	5.5869		1.301	2.25	3.9604		2.816	2.25	3.7277			1.5	4.5	0.0282		1.4	4.5	0		0.6	4.5	0		0.7	4.5	0.0564		0.6	4.5	0		1.4	4.5	0
	1.813	2.35	0.7043		1.638	2.35	0.3741		0.898	2.35	0.1953		0.951	2.35	4.2889		1.832	2.35	2.9703		0.913	2.35	3.4036			0.6	4.7	0.0141		1.1	4.7	0		0.6	4.7	0.0122		0.7	4.7	0		1.1	4.7	0		0.6	4.7	0
	2.174	2.45	0.6198		1.326	2.45	0.2694		1.066	2.45	0.293		1.557	2.45	3.5553		1.769	2.45	2.546		2.995	2.45	4.8622			0.6	4.9	0		0.6	4.9	0.0299		0.7	4.9	0		0.7	4.9	0		0.8	4.9	0		1.4	4.9	0
	0.854	2.55	0.5635		0.893	2.55	0.2694		0.962	2.55	0.1099		1.094	2.55	4.3454		1.325	2.55	2.1216		1.193	2.55	3.4036			0.7	5.1	0		0.6	5.1	0.0449		0.6	5.1	0		1.4	5.1	0		0.7	5.1	0		0.8	5.1	0
	1.612	2.65	0.2395		1.803	2.65	0.1946		1.036	2.65	0.2319		0.827	2.65	3.2731		1.544	2.65	3.3946		2.533	2.65	2.7553			0.7	5.3	0.0141		0.8	5.3	0.015		1.9	5.3	0		0.6	5.3	0		1	5.3	0		3.2	5.3	0
	1.289	2.75	0.3099		1.033	2.75	0.2394		1.594	2.75	0.1343		1.232	2.75	3.0474		1.385	2.75	2.1216		1.144	2.75	3.5656			0.8	5.5	0		1.2	5.5	0		1	5.5	0		0.6	5.5	0		0.7	5.5	0		1	5.5	0
	1.716	2.85	0.2395		1.098	2.85	0.1796		1.113	2.85	0.0977		1.902	2.85	1.7494		1.811	2.85	2.1216		1.2	2.85	3.8898			0.7	5.7	0		0.8	5.7	0		0.6	5.7	0		1.5	5.7	0		1.3	5.7	0		0.6	5.7	0
	1.684	2.95	0.1972		1.154	2.95	0.1347		0.818	2.95	0.0854		1.769	2.95	1.3544		1.313	2.95	0.8487		1.338	2.95	3.8898			0.6	5.9	0		0.8	5.9	0.015		0.9	5.9	0		0.7	5.9	0		0.8	5.9	0		0.7	5.9	0
	1.884	3.05	0.1268		1.156	3.05	0.0599		2.408	3.05	0.0488		2.496	3.05	1.3544		1.219	3.05	1.1315		1.032	3.05	1.4587			0.8	6.1	0		0.7	6.1	0		0.6	6.1	0.0122		0.6	6.1	0		0.6	6.1	0		0.7	6.1	0
	1.081	3.15	0.1268		1.56	3.15	0.1347		1.349	3.15	0.0854		2.002	3.15	0.9594		1.796	3.15	1.1315		1.379	3.15	2.5932			0.6	6.3	0		0.7	6.3	0		0.6	6.3	0		3.4	6.3	0		0.6	6.3	0		0.7	6.3	0
	2.029	3.25	0.1127		1.461	3.25	0.1347		0.812	3.25	0.0977		1.976	3.25	0.9029		1.169	3.25	1.6973		1.057	3.25	1.6207			1.1	6.5	0		1.8	6.5	0		0.6	6.5	0		1	6.5	0		0.7	6.5	0		0.8	6.5	0
	2.348	3.35	0.0282		1.193	3.35	0.1048		1.14	3.35	0.0366		1.388	3.35	0.4515		2.141	3.35	1.273		0.995	3.35	1.2966			0.7	6.7	0		0.6	6.7	0		0.9	6.7	0		0.6	6.7	0		0.9	6.7	0		1.2	6.7	0
	1.653	3.45	0.0563		1.228	3.45	0.0449		1.205	3.45	0.0122		0.886	3.45	0.5079		1.776	3.45	0.7072		2.571	3.45	1.4587			0.7	6.9	0		0.8	6.9	0		1	6.9	0		0.8	6.9	0		0.8	6.9	0		4	6.9	0
	1.635	3.55	0.0704		1.25	3.55	0.0748		1.204	3.55	0.0488		1.362	3.55	0.4515		1.088	3.55	0.7072		3.296	3.55	0.9724			0.6	7.1	0		0.8	7.1	0.015		0.8	7.1	0		0.6	7.1	0		0.8	7.1	0		0.8	7.1	0
	1.297	3.65	0		1.317	3.65	0.0898		1.098	3.65	0		1.381	3.65	0.1129		2.449	3.65	0.8487		2.891	3.65	0.9724			1.5	7.3	0		0.6	7.3	0		1	7.3	0		1	7.3	0		1.1	7.3	0		0.6	7.3	0
	1.129	3.75	0		1.019	3.75	0.0748		0.888	3.75	0.0122		1.615	3.75	0		1.465	3.75	0.4243		2.803	3.75	1.2966			1	7.5	0		0.8	7.5	0		0.6	7.5	0		0.7	7.5	0		0.9	7.5	0		1.7	7.5	0
	1.446	3.85	0		1.514	3.85	0.0449		1.216	3.85	0.0366		1.501	3.85	0.1693		1.85	3.85	0.7072		1.233	3.85	0.9724			1.2	7.7	0		0.7	7.7	0		0.7	7.7	0		0.9	7.7	0		0.6	7.7	0		0.6	7.7	0
	1.246	3.95	0.0141		1.499	3.95	0.0449		0.909	3.95	0.0122		1.874	3.95	0.0564		1.339	3.95	0.4243		1.261	3.95	0.4862			1.7	7.9	0		0.7	7.9	0		0.7	7.9	0		0.7	7.9	0		0.8	7.9	0		0.6	7.9	0
	1.289	4.05	0		0.986	4.05	0.0299		0.667	4.05	0		1.717	4.05	0.2822		1.649	4.05	0.2829		2.176	4.05	0.1621			0.7	8.1	0		1	8.1	0		1.1	8.1	0		1.8	8.1	0		0.9	8.1	0		0.6	8.1	0
	1.118	4.15	0.0141		1.213	4.15	0		0.807	4.15	0		1.663	4.15	0.1693		1.193	4.15	0.8487		1.317	4.15	0.1621			1	8.3	0		0.9	8.3	0		0.6	8.3	0		0.7	8.3	0		0.7	8.3	0		0.6	8.3	0
	1.271	4.25	0		1.531	4.25	0		1.219	4.25	0		2.011	4.25	0.0564		1.991	4.25	0		2.165	4.25	0.3241			0.8	8.5	0		0.8	8.5	0		0.7	8.5	0		0.6	8.5	0		0.9	8.5	0		0.9	8.5	0
	1.434	4.35	0		0.827	4.35	0		1.023	4.35	0		1.42	4.35	0.0564		1.201	4.35	0		1.287	4.35	0.1621			0.9	8.7	0		0.6	8.7	0		0.6	8.7	0		0.7	8.7	0		1.6	8.7	0		1.4	8.7	0
	0.546	4.45	0		1.502	4.45	0		0.998	4.45	0		1.399	4.45	0		1.175	4.45	0		2.902	4.45	0.1621			0.7	8.9	0		0.6	8.9	0		0.6	8.9	0		1	8.9	0		0.9	8.9	0		0.7	8.9	0
	1.238	4.55	0		1.766	4.55	0		1.766	4.55	0		1.629	4.55	0.0564		1.642	4.55	0.1414		1.5	4.55	0.1621			0.7	9.1	0		0.6	9.1	0		0.9	9.1	0		0.6	9.1	0		0.9	9.1	0		0.7	9.1	0
	0.634	4.65	0		1.411	4.65	0.015		1.618	4.65	0		1.056	4.65	0		1.162	4.65	0		1.084	4.65	0.1621			0.6	9.3	0		0.7	9.3	0		0.6	9.3	0		1.4	9.3	0		0.6	9.3	0		0.6	9.3	0
	0.712	4.75	0.0141		1.338	4.75	0		2.262	4.75	0		1.666	4.75	0.0564		0.666	4.75	0.2829		1.466	4.75	0			0.7	9.5	0		0.9	9.5	0		0.9	9.5	0		1.1	9.5	0		1	9.5	0		0.7	9.5	0
	1.486	4.85	0.0141		0.941	4.85	0		1.534	4.85	0.0122		1.317	4.85	0		1.142	4.85	0		1.256	4.85	0			1	9.7	0		0.6	9.7	0		1	9.7	0		1.6	9.7	0		1	9.7	0		0.6	9.7	0
	1.3	4.95	0		1.502	4.95	0		1.003	4.95	0		1.983	4.95	0		1.337	4.95	0		2.078	4.95	0			1.8	9.9	0		0.7	9.9	0		0.6	9.9	0		0.8	9.9	0		0.6	9.9	0		0.7	9.9	0
	1.226	5.05	0		1.256	5.05	0		1.094	5.05	0		2.397	5.05	0		1.84	5.05	0		1.668	5.05	0			1.4				0.6				0.6				1.8				0.6				0.7
	1.245	5.15	0		1.409	5.15	0		0.668	5.15	0		2.544	5.15	0		1.343	5.15	0		1.111	5.15	0.1621			0.6				0.6				0.8				0.7				0.7				0.6
	1.199	5.25	0		1.422	5.25	0		1.784	5.25	0		0.721	5.25	0		1.18	5.25	0.1414		1.584	5.25	0			0.9				0.8				0.6				0.6				0.6				1
	1.438	5.35	0		1.494	5.35	0		1.391	5.35	0		1.277	5.35	0		1.503	5.35	0		2.225	5.35	0			1.2				0.6				0.6				0.8				0.6				1
	1.013	5.45	0		1.424	5.45	0		1.208	5.45	0		0.832	5.45	0		2.244	5.45	0		3.155	5.45	0			0.6				0.6				1.2				0.6				0.8				0.6
	1.313	5.55	0		1.135	5.55	0		1.097	5.55	0		1.788	5.55	0		1.463	5.55	0		1.312	5.55	0			0.6				0.6				0.8				1.2				0.7				1
	1.976	5.65	0		1.03	5.65	0		0.691	5.65	0		1.207	5.65	0		1.05	5.65	0		3.006	5.65	0			0.7				0.7				0.7				0.6				0.9				1.2
	1.049	5.75	0		1.098	5.75	0		0.621	5.75	0		2.856	5.75	0		1.071	5.75	0		2.42	5.75	0			0.7				0.6				0.6				1.1				0.8				0.9
	1.036	5.85	0		1.437	5.85	0		1.003	5.85	0		1.375	5.85	0		1.411	5.85	0		2.542	5.85	0			0.7				1.4				0.6				1.4				0.8				1.5
	1.144	5.95	0		1.337	5.95	0		0.88	5.95	0		1.181	5.95	0		1.325	5.95	0		2.449	5.95	0			1				0.6				1.3				0.8				0.7				0.8
	1.057	6.05	0		1.545	6.05	0		1.619	6.05	0		1.07	6.05	0		2.937	6.05	0		1.232	6.05	0			0.6				0.7				0.6				0.8				1.9				1.2
	1.256	6.15	0		1.552	6.15	0		1.611	6.15	0		1.818	6.15	0		1.812	6.15	0		1.213	6.15	0			0.6				0.6				0.6				1				1.3				0.6
	0.847	6.25	0		1.454	6.25	0		1.143	6.25	0		0.992	6.25	0		1.446	6.25	0		1.326	6.25	0			0.8				0.8				1.1				0.7				0.6				0.6
	1.202	6.35	0		1.119	6.35	0		0.771	6.35	0		2.002	6.35	0		2.338	6.35	0		1.269	6.35	0			0.6				1.2				0.6				0.7				0.9				0.6
	1.105	6.45	0		1.23	6.45	0		1.136	6.45	0		1.771	6.45	0		4.008	6.45	0		2.247	6.45	0			0.6				0.6				0.6				1.4				0.6				1
	1.338	6.55	0		1.953	6.55	0		1.606	6.55	0		2.252	6.55	0		3.688	6.55	0		1.045	6.55	0			0.9				0.7				0.6				0.8				0.8				1.4
	2.142	6.65	0		1.202	6.65	0		0.94	6.65	0		0.977	6.65	0		2.666	6.65	0		1.419	6.65	0			0.7				0.9				0.6				0.6				2.3				1.4
	1.414	6.75	0		1.427	6.75	0		0.868	6.75	0		1.773	6.75	0		0.593	6.75	0		2.135	6.75	0			1				0.7				0.9				0.6				0.6				1.9
	0.851	6.85	0		1.232	6.85	0		1.443	6.85	0		2.724	6.85	0		0.655	6.85	0		2.104	6.85	0			0.6				0.9				0.9				1.1				0.6				1.6
	1.391	6.95	0		0.986	6.95	0		1.085	6.95	0		1.177	6.95	0		1.094	6.95	0		3.193	6.95	0			0.6				1.1				1				0.7				1.1				1
	0.971	7.05	0		1.567	7.05	0		1.437	7.05	0		1.504	7.05	0		1.006	7.05	0		1.518	7.05	0			0.8				0.9				0.8				1				0.7				1
	0.789	7.15	0		1.68	7.15	0		0.636	7.15	0		1.03	7.15	0		1.205	7.15	0		2.219	7.15	0			1.2				0.6				0.6				0.8				1.2				0.8
	1.449	7.25	0		2.766	7.25	0		1.178	7.25	0		1.054	7.25	0		1.579	7.25	0		1.005	7.25	0			1.2				0.8				0.9				0.6				0.7				0.8
	0.861	7.35	0		1.144	7.35	0		0.976	7.35	0		1.856	7.35	0		2.53	7.35	0		2.136	7.35	0			0.6				1				0.7				0.6				0.7				1.1
	1.613	7.45	0		1.471	7.45	0		1.037	7.45	0		1.676	7.45	0		2.421	7.45	0		2.44	7.45	0			1				1.4				1.5				0.7				0.7				0.9
	1.584	7.55	0		1.296	7.55	0		1.011	7.55	0		1.825	7.55	0		0.943	7.55	0		2.148	7.55	0			0.8				0.6				0.7				0.7				0.6				2.5
	1.429	7.65	0		1.305	7.65	0		1.138	7.65	0		2.363	7.65	0		1.763	7.65	0		2.46	7.65	0			1				1.1				0.8				1.4				0.8				0.8
	0.549	7.75	0		1.401	7.75	0		1.678	7.75	0		1.567	7.75	0		2.614	7.75	0		2.443	7.75	0			0.6				0.7				0.7				0.7				0.6				0.9
	1.173	7.85	0		1.037	7.85	0		1.793	7.85	0		3.04	7.85	0		1.832	7.85	0		2.543	7.85	0			0.6				0.6				1				0.6				0.8				0.8
	0.885	7.95	0		1.051	7.95	0		0.794	7.95	0		2.202	7.95	0		3.768	7.95	0		2.163	7.95	0			1.5				0.6				0.7				2				2				1.8
	0.976	8.05	0		1.611	8.05	0		1.363	8.05	0		1.97	8.05	0		1.477	8.05	0		0.918	8.05	0			1				0.7				0.7				0.8				1.2				0.6
	0.946	8.15	0		1.195	8.15	0		1.429	8.15	0		1.621	8.15	0		1.499	8.15	0		1.84	8.15	0			0.6				0.6				1.1				0.7				0.8				2.2
	1.197	8.25	0		1.368	8.25	0		0.876	8.25	0		2.485	8.25	0		0.983	8.25	0		2.458	8.25	0			0.7				0.8				0.8				0.6				1.1				1.1
	1.135	8.35	0		0.797	8.35	0		0.775	8.35	0		1.602	8.35	0		2.352	8.35	0		2.566	8.35	0			0.7				0.7				0.8				0.8				0.8				0.7
	1.656	8.45	0		1.197	8.45	0		0.958	8.45	0		1.827	8.45	0		1.504	8.45	0		2.811	8.45	0			0.7				1.6				0.9				0.9				0.8				0.7
	1.094	8.55	0		0.934	8.55	0		1.633	8.55	0		1.419	8.55	0		2.677	8.55	0		1.31	8.55	0			1				0.7				1.1				0.7				1.3				0.7
	0.685	8.65	0		1.607	8.65	0		0.965	8.65	0		1.762	8.65	0		2.36	8.65	0		2.022	8.65	0			1				0.6				0.6				0.7				1.3				1.3
	1.355	8.75	0		0.953	8.75	0		1.036	8.75	0		0.869	8.75	0		1.244	8.75	0		2.697	8.75	0			0.7				0.7				0.8				0.6				0.6				1.9
	1.514	8.85	0		1.415	8.85	0		1.442	8.85	0		0.477	8.85	0		1.162	8.85	0		2.424	8.85	0			1.3				0.8				0.8				0.6				2.8				1.8
	1.323	8.95	0		1.4	8.95	0		1.054	8.95	0		1.546	8.95	0		1.479	8.95	0		1.884	8.95	0			0.8				0.9				1				0.7				0.6				1.1
	1.411	9.05	0		1.825	9.05	0		0.764	9.05	0		1.888	9.05	0		3.668	9.05	0		1.022	9.05	0			0.8				0.6				0.6				0.8				1.1				0.6
	1.078	9.15	0		1.267	9.15	0		1.085	9.15	0		0.96	9.15	0		2.228	9.15	0		0.81	9.15	0			1.7				0.6				0.6				0.7				0.9				0.7
	1.114	9.25	0		1.03	9.25	0		1.261	9.25	0		0.716	9.25	0		0.675	9.25	0		1.772	9.25	0			1.1				0.7				1.4				0.6				0.7				0.6
	1.304	9.35	0		1.384	9.35	0		1.152	9.35	0		1.046	9.35	0		2.729	9.35	0		1.134	9.35	0			1.7				0.6				0.9				0.7				3.6				0.7
	1.219	9.45	0		1.179	9.45	0		1.611	9.45	0		1.851	9.45	0		0.719	9.45	0		1.425	9.45	0			1				0.8				0.9				0.6				0.6				0.6
	1.142	9.55	0		0.755	9.55	0		1.036	9.55	0		2.393	9.55	0		1.082	9.55	0		2.452	9.55	0			0.6				0.6				1.3				0.6				0.6				0.6
	1.162	9.65	0		1.485	9.65	0		0.692	9.65	0		1.835	9.65	0		1.612	9.65	0		2.091	9.65	0			0.8				0.8				0.6				0.8				2.3				0.6
	1.11	9.75	0		1.109	9.75	0		0.863	9.75	0		1.821	9.75	0		2.082	9.75	0		2.662	9.75	0			1.3				0.7				0.8				0.7				2.4				0.9
	1.102	9.85	0		0.701	9.85	0		0.903	9.85	0		1.807	9.85	0		1.752	9.85	0		1.936	9.85	0			0.7				0.6				1				0.6				0.6				0.7
	1.299	9.95	0		1.578	9.95	0		0.954	9.95	0		1.716	9.95	0		1.205	9.95	0		1.994	9.95	0			1.5				0.6				0.6				0.6				0.6				0.9
	0.869				1.322				0.677				2.372				2.023				2.388					0.9				0.6				0.7				0.7				0.7				0.6
	0.826				1.461				1.344				1.799				1.283				2.008					2.6				0.7				2.1				0.8				0.6				1.3
	0.923				2.278				1.167				2.563				1.394				2.059					0.8				0.7				1				0.9				0.6				0.7
	0.66				1.369				0.945				2.749				0.95				2.922					0.9				1.7				0.6				1.6				0.6				0.7
	1.939				1.355				0.862				1.88				0.845				2.46					0.6				1.5				0.8				0.9				0.7				0.7
	1.572				1.356				0.719				1.696				3.031				1.122					0.7				2.7				0.7				0.6				0.9				0.7
	1.342				1.321				1.189				2.109				1.442				0.645					1.3				0.7				0.9				0.6				0.6				0.6
	1.063				1.499				1.469				1.263				1.975				3.378					0.6				0.8				1				0.7				0.6				1.1
	2.189				1.069				1.465				1.183				3.47				2.376					0.6				1.1				0.9				0.8				0.7				2.2
	1.137				1.362				0.879				4.103				1.647				2.466					1				0.6				0.7				0.6				0.7				0.8
	1.386				1.26				1.054				1.496				1.817				0.858					0.6				2.3				0.8				0.6				0.6				0.7
	1.16				1.088				1.328				1.734				1.65				2.019					0.6				0.8				0.8				0.8				0.7				0.9
	1.192				1.443				0.89				1.565				2.062				2.853					0.8				0.6				1.1				0.6				0.6				1.5
	1.611				1.096				0.582				0.942				1.453				2.018					0.6				2.3				0.7				0.7				0.8				0.7
	1.211				1.491				0.592				2.141				1.315				5.101					0.7				1				0.7				0.6				0.6				0.6
	1.387				1.402				0.677				2.538				1.575				0.74					0.9				0.6				0.6				0.6				0.8				0.6
	1.563				1.395				1.036				3.448				1.865				3.571					1				1				1				0.7				0.9				0.7
	0.723				1.115				0.748				1.157				2.709				3.403					0.6				0.8				1.4				0.8				0.7				0.6
	1.005				1.722				1.016				1.187				1.73				2.944					0.6				0.6				0.6				0.6				1.4				0.6
	1.145				1.271				0.863				1.121				1.448				2.639					1.1				0.9				0.6				0.6				0.8				0.6
	1.155				0.904				1.523				1.955				1.505				1.96					1.2				0.9				0.6				1.5				2.1				0.9
	1.072				1.485				1.236				2.211				3.947				2.029					1.3				0.7				0.6				0.6				0.7				0.7
	1.422				1.988				0.92				2.309				1.733				3.884					1				0.9				0.7				0.9				0.6				1.2
	1.311				1.379				1.241				1.049				2.116				1.509					0.6				0.9				1.8				0.9				0.6				0.6
	1.499				1.285				1.385				2.243				2.495				1.13					0.6				0.8				1.2				0.7				1.2				0.7
	0.989				1.059				0.943				2.178				2.835				4.239					0.6				0.7				0.9				0.6				1				1.1
	1.621				1.384				1.154				1.207				1.534				2.76					0.7				0.7				0.9				1.1				1.3				0.9
	0.856				1.17				1.21				1.574				2.051				1.855					0.7				0.8				0.8				0.7				1.4				0.6
	1.554				1.659				1.337				2.323				2.7				0.64					0.8				1				0.6				0.8				0.7				0.8
	1.244				0.887				1.432				2.623				2.617				1.725					0.6				0.6				0.7				1				1				0.6
	1.183				1.752				1.424				1.014				2.817				2.992					0.6				0.7				0.9				0.6				1.4				1
	1.043				1.407				0.871				1.398				2.574				0.555					0.9				0.6				0.8				0.6				0.7				0.7
	0.978				1.103				1.175				0.977				1.964				2.649					0.7				0.7				0.6				1.1				0.7				0.9
	1.206				1.321				1.347				2.124				1.369				2.456					0.6				2				0.7				1.6				0.8				2.2
	1.386				1.126				1.53				1.851				1.794				2.759					0.6				0.7				0.6				0.6				1.5				1.3
	1.123				0.853				0.709				2.028				2.614				2.031					0.6				0.6				0.6				1.4				1.2				1.2
	1.766				1.551				1.252				1.941				2.445				1.847					0.6				0.7				0.8				1.8				1.3				0.6
	1.312				0.99				0.846				2.792				2.522				1.461					1				1.4				0.7				1.2				0.6				1.7
	1.145				1.404				0.628				1.4				0.77				2.167					0.8				2.1				0.6				1				0.7				0.6
	1.39				1.359				1.128				1.264				3.771				2.184					0.9				1.4				1.1				1.5				1.5				0.9
	1.69				1.278				1.919				1.316				1.472				2.304					0.7				1.1				0.6				1				0.6				2.3
	1.225				1.144				1.021				1.653				2.299				1.275					0.6				1.5				0.6				3.7				1.3				1
	1.234				1.353				1.554				1.905				1.086				1.547					0.8				1				0.7				0.8				0.6				0.6
	1.139				1.394				1.306				2.56				2.188				2.09					1.7				1.9				0.9				2.8				1.4				0.8
	1.297				1.468				1.329				2.617				1.927				1.267					1.3				0.9				1.4				0.7				0.9				0.9
	0.946				1.055				1.273				2.534				1.004				2.454					0.6				0.8				1.3				0.7				0.7				0.8
	1.233				1.226				1.282				2.503				2.18				1.133					0.6				0.8				0.6				0.9				2.8				0.6
	0.925				1.178				0.748				2.306				1.416				1.254					0.6				1.9				0.6				0.7				0.6				1
	1.21				1.223				0.63				2.755				1.669				1.358					1.1				0.9				0.8				0.8				0.6				1.8
	0.982				1.265				0.844				1.889				1.968				1.898					0.7				1				0.6				0.7				0.6				0.8
	0.89				1.06				1.066				0.909				2.514				2.459					0.6				1.5				0.7				0.8				1				1.3
	1.54				0.788				0.951				1.391				2.023				3.28					0.9				0.7				1.2				0.6				0.7				0.7
	1.102				1.026				1.499				1.241				2.617				1.818					1.3				0.9				1.1				0.6				0.9				0.7
	1.267				1.236				0.946				1.686				2.478				1.353					0.6				1.4				0.6				0.7				0.6				1
	1.546				1.3				1.283				1.325				1.985				1.878					0.6				0.9				1				1.4				0.7				1
	1.05				1.312				1.252				1.39				2.802				2.899					0.7				0.6				0.7				0.7				1.7				4.1
	1.029				1.21				0.983				2.189				2.796				2.103					0.6				0.7				1.3				1.1				0.7				2
	1.056				1.192				0.766				2.501				1.31				0.947					0.6				0.9				0.6				0.7				1				0.9
	0.771				1.402				1.017				1.91				3.885				1.558					0.6				0.7				0.6				1				0.9				0.7
	2.175				1.191				0.716				2.782				3.151				1.813					0.6				0.7				0.8				1				0.6				0.7
	1.625				1.136				1.021				2.52				1.543				2.881					0.8				1				0.6				1.3				0.7				1.5
	1.03				1.017				0.871				2.328				2.298				3.964					1				0.9				0.6				1.5				0.9				1
	0.685				1.359				1.053				2.259				1.714				3.487					1				0.6				0.9				1.2				0.9				0.9
	0.917				1.204				0.789				2.297				2.823				3.228					0.7				0.6				0.6				1.2				2.2				0.6
	0.996				1.021				1.626				2.172				2.629				2.102					1				0.8				0.7				0.7				3.7				0.6
	1.022				1.295				0.924				2.106				3.365				3.131					1.2				0.7				0.8				0.6				0.7				1.4
	0.977				1.471				0.637				2.548				2.665				1					0.9				0.6				0.6				0.8				1.1				0.6
	0.742				1.371				0.885				0.962				3.274				1.473					0.6				1				0.7				0.6				1.1				0.6
	1.216				1.088				1.278				1.81				2.671				1.167					0.7				1				1.5				0.7				1				0.7
	1.304				1.136				1.054				0.916				3.149				2.095					0.7				1.3				0.7				0.8				1.7				0.8
	2.51				1.432				0.677				1.917				3.114				1.418					0.6				0.7				1.1				1.5				1				0.6
	1.039				1.369				0.894				1.693				2.259				2.769					0.6				0.6				0.9				1				0.6				0.6
	1.035				1.488				1.218				0.911				2.511				2.909					0.7				0.7				0.6				0.7				1.4				1.3
	0.902				1.423				0.862				2.01				1.271				1.459					0.6				0.7				0.9				0.8				0.6				0.7
	1.972				1.498				0.869				2.647				1.069				0.797					0.6				0.9				0.7				0.9				0.8				0.6
	1.541				1.46				1.332				1.761				1.163				2.436					0.6				1.4				0.8				0.8				0.8				1.2
	1.091				1.433				1.411				1.756				0.912				1.218					0.7				0.7				1				0.9				1.8				0.8
	0.868				1.362				1.331				1.364				1.533				1.263					0.8				0.7				0.9				0.6				0.9				0.7
	0.844				1.2				0.996				1.625				0.865				1.291					0.6				0.6				0.7				1.4				0.6				0.6
	1.561				1.128				0.981				1.411				1.811				1.333					1.4				0.8				1.2				0.9				1.2				0.7
	1.069				1.411				1.049				1.294				1.536				2.076					1				0.6				0.6				0.8				0.8				1
	1.026				1.445				0.927				2.175				0.826				2.248					1.4				0.6				0.8				0.8				0.6				0.6
	1.143				2.389				0.556				2.194				1.413				1.479					1.1				1.1				0.6				1				0.7				0.8
	1.112				0.876				0.904				2.091				1.353				3.861					3.6				0.6				0.8				0.6				0.6				1.2
	1.194				1.48				0.578				1.746				0.96				4.102					1.1				1				0.6				0.9				0.6				0.7
	1.158				1.302				0.891				2.225				1.326				2.773					0.7				1.8				0.7				0.6				1				0.7
	1.184				1.003				1.532				1.705				1.381				2.951					1.8				1.4				1.2				1.3				1.4				2.1
	1.41				1.019				1.233				2.175				1.94				2.928					0.6				0.6				0.7				0.6				0.9				1.2
	1.481				1.016				1.229				2.949				0.749				2.425					1				0.6				0.6				0.7				1				0.7
	1.563				0.945				0.641				1.111				1.158				2.272					0.6				0.6				0.7				0.6				0.8				0.6
	2.844				0.89				2				1.884				1.305				3.481					0.7				1.5				0.6				0.7				0.7				0.7
	1.24				1.416				1.07				2.586				2.335				3.936					1				0.9				0.7				0.9				1				0.7
	1.341				1.283				1.431				0.965				1.952				0.865					0.8				1.1				0.6				0.9				0.7				0.6
	1.568				0.916				0.913				1.745				1.676				2.842					0.7				0.7				0.7				0.7				0.6				1.1
	1.419				1.125				1.004				2.333				2.033				3.3					0.7				0.9				0.6				0.9				1				0.7
	1.064				1.187				0.875				0.7				3.582				2.128					0.9				1.4				0.7				0.6				2.5				1
	0.923				1.025				1.366				3.06				0.852				2.002					0.9				0.6				0.8				0.7				0.9				1.2
	1.398				1.063				1.725				1.443				2.153				2.565					0.8				1.8				1.1				0.6				1.5				1.2
	0.994				1.341				1.175				3.086				1.832				3.743					1.1				0.9				0.8				1.6				0.6				1.2
	1.032				0.787				1.078				2.099				2.013				2.101					2.5				1				0.6				0.8				0.6				1
	1.274				1.57				1.025				1.359				1.425				1.463					1.7				1.1				0.8				1.2				0.6				0.8
	1.4				1.714				1.172				3.925				1.325				1.15					0.6				0.8				1.5				0.7				0.6				0.6
	1.055				1.541				1.062				1.941				1.043				1.33					0.8				0.6				1.3				0.6				0.6				0.7
	0.927				1.109				0.835				3.352				1.332				0.684					1.5				1.7				1.1				1				2				0.7
	2.307				1.297				0.928				1.416				1.695				1.749					0.6				0.9				0.6				0.6				1.1				0.6
	1.527				1.032				0.999				1.272				2.393				2.273					0.6				0.8				0.9				0.6				1.1				0.6
	1.66				1.124				0.984				2.173				1.181				2.73					0.9				0.8				0.6				1.2				0.9				1.8
	1.424				1.368				1.716				1.802				1.018				2.771					0.6				1.3				0.9				1.9				0.7				0.6
	2.43				1.323				1.465				2.05				1.327				1.188					0.6				0.8				1.5				0.6				0.6				0.9
	1.593				1.14				0.843				2.046				1.538				1.859					0.6				1.2				0.7				1.5				2.4				1.3
	0.921				1.125				1.108				2.347				1.893				0.997					1.3				0.7				0.6				1.6				0.6				0.8
	0.915				0.751				1.347				1.699				3.863				1.253					0.6				0.7				0.9				1.7				0.7				0.8
	2.094				1.063				0.822				2.23				1.535				2.199					0.8				0.8				0.8				0.9				1.2				0.6
	2.517				1.049				1.395				2.891				1.573				0.973					0.6				1.4				0.8				1.4				0.8				0.9
	1.332				1.389				1.114				1.313				1.75				1.456					0.6				0.6				0.7				0.7				0.9				0.7
	1.103				1.045				0.93				1.977				2.032				0.848					0.6				0.8				0.8				0.7				0.8				0.6
	0.755				1.977				1.252				1.763				1.829				2.162					0.7				1.1				0.7				1.7				1.2				0.8
	0.786				1.314				0.998				1.509				1.516				3.911					0.6				0.8				1.3				1.2				0.8				1.3
	1.203				1.284				1.295				1.954				1.971				1.93					1.2				0.6				0.9				1.9				0.7				2
	0.992				1.332				1.205				1.914				1.873				0.931					0.6				0.6				0.6				1.3				0.7				0.7
	0.966				1.565				1.462				1.068				2.291				1.245					1.9				0.8				1				0.6				1.1				0.6
	1.108				1.399				1.31				1.866				1.582				2.15					0.6				0.7				0.6				0.8				0.6				0.8
	1.011				1.233				1.404				2.658				2.109				1.939					0.6				0.9				1.3				0.8				1.8				0.6
	1.235				0.942				1.05				2.613				1.779				1.215					0.6				0.9				1.1				0.9				0.9				0.6
	1.093				3.481				1.31				2.964				1.195				2.217					1.2				0.6				1.6				2.4				0.8				0.7
	1.158				1.257				0.872				1.509				1.727				1.578					1.1				1.3				0.7				0.9				0.7				2.3
	1.469				1.451				1.024				1.906				1.24				2.902					0.6				1.4				1.2				0.9				0.9				0.7
	1.2				1.492				0.91				2.165				3.347				1.633					0.8				0.7				0.7				0.8				0.8				0.8
	0.875				1.429				0.727				1.764				0.906				3.336					0.9				0.7				0.8				0.7				0.7				1.2
	0.879				1.784				2.019				2.543				3.216				1.705					0.9				0.9				0.8				1.1				0.6				0.7
	1.94				1.841				1.137				3.211				2.87				3.14					0.7				0.6				1.5				1.4				0.6				0.9
	1.463				1.38				0.702				0.802				2.099				2.339					1.2				0.7				0.6				0.6				2.3				3.6
	1.99				1.137				1.168				2.964				4.195				1.346					0.6				0.7				0.9				1.5				0.6				1.1
	1.32				1.092				1.975				2.846				3.974				2.419					0.9				0.7				0.9				1				0.8				1.9
	1.945				0.917				1.55				2.888				2.4				2.361					0.9				0.6				0.7				2.8				0.6				1.1
	0.701				1.42				1.752				1.174				1.456				2.225					0.7				1.1				1.1				0.6				2				0.6
	1.382				0.981				0.779				1.755				3.304				1.952					1.9				0.6				0.8				0.7				0.7				1.2
	1.643				0.843				1.555				2.546				2.289				2.429					0.7				0.7				0.8				0.6				0.7				0.6
	1.388				1.544				1.06				2.002				1.566				1.886					0.8				0.8				1.2				1.2				0.8				0.6
	1.609				1.367				1.309				2.627				3.7				2.621					1.2				2.1				1.1				0.8				2.3				0.9
	0.801				0.854				1.599				1.394				2.729				3.522					0.6				1.1				1.1				0.8				1.2				2.1
	1.087				1.341				1.416				2.047				3.856				0.711					0.6				0.7				0.6				1				1.7				0.7
	1.248				0.814				1.036				2.678				1.73				1.064					0.9				0.6				1.3				0.9				0.8				0.9
	1.219				2.955				1.08				2.141				0.975				0.719					0.6				1.3				0.6				1				0.7				0.8
	0.922				1.112				0.68				2.116				1.181				1.602					0.6				0.7				1				1.2				0.9				0.6
	1.584				1.107				1.476				2.418				1.362				2.992					0.8				0.6				1.2				1				1.2				2.8
	1.06				1.018				1.087				2.557				1.652				2.197					0.6				0.7				0.6				0.9				0.7				0.6
	1.008				0.767				1.235				1.284				1.795				1.648					0.8				0.8				0.9				0.7				0.7				0.6
	1.071				1.196				1.377				0.697				0.928				2.636					0.6				1				0.6				0.6				0.6				1
	1.43				1.021				1.065				2.327				3.329				0.999					0.9				0.6				2				1.3				1				1.5
	1.418				1.116				1.358				2.084				1.137				0.663					0.6				0.8				1.1				0.8				0.7				0.9
	1.323				1.287				1.304				2.176				3.843				0.766					0.6				1.8				0.7				0.7				0.8				0.9
	1.054				1.191				1.216				0.868				1.671				0.861					1.6				0.9				0.7				0.8				1.6				0.6
	1.462				1.222				1.13				2.244				1.169				1.118					1.4				0.6				0.7				1.2				0.7				1.1
	1.34				1.211				1.319				2.731				1.182				0.956					0.7				0.6				1.1				0.9				1				0.6
	1.02				1.454				1.078				1.844				2.566				2.016					1				1.2				1.2				1.3				1.1				1.6
	0.858				1.275				0.825				1.171				2.776				1.525					0.7				0.7				0.8				0.6				0.6				1
	1.493				1.576				0.729				1.467				4.19				2.51					0.8				0.6				0.7				0.6				0.9				0.9
	1.335				1.412				1.21				1.841				0.751				0.971					1				0.8				0.7				1				0.6				0.6
	0.588				1.517				0.856				2.645				3.189				0.945					0.6				0.9				0.7				1.1				0.9				1.6
	1.043				1.03				0.957				2.191				1.719				0.758					1.2				0.9				1.4				1.3				1.4				1.9
	0.989				0.569				0.872				0.873				3.3				0.706					1.8				0.6				0.6				0.6				1.6				0.6
	1.475				1.11				1.169				3.428				1.333				2.28					0.6				0.8				0.8				0.6				2				1
	0.736				1.054				1.162				2.717				2.571				0.97					0.8				0.7				0.8				0.6				2.2				0.7
	1.109				1.304				1.669				1.731				1.462				0.979					0.8				2				1.2				0.6				1				0.7
	1.092				1.142				0.717				3.576				4.128				1.408					0.6				0.8				0.7				0.6				1				3.2
	0.943				0.852				1.167				2.232				1.479				1.117					1.1				0.6				1.4				0.8				0.7				1.4
	1.375				1.194				1.106				1.64				1.274				1.012					2.5				1				2				0.9				0.6				1.4
	0.906				1.299				1.102				1.73				3.564				1.443					1				1.1				0.6				1				0.7				0.6
	1.31				1.246				0.957				2.353				2.678				1.4					1.8				0.7				1.1				0.7				0.8				1
	1.061				0.911				0.809				2.33				0.87				1.004					0.8				0.6				0.6				0.7				1.1				0.9
	1.511				1.549				0.988				0.982				0.798				1.072					0.7				1				0.6				0.7				0.6				0.6
	1.366				1.43				1.178				1.817				1.172				1.246					0.6				0.7				0.7				1.1				0.7				1.3
	0.986				1.005				2.184				2.753				1.804				0.785					0.6				0.7				0.7				0.7				1				0.6
	0.924				1.381				1.027				1.19				0.999				1.766					0.6				0.6				0.9				0.7				0.7				0.8
	1.566				1.18				1.1				2.142				2.074				1.834					1.1				0.7				0.6				1.1				0.7				1.2
	1.19				1.501				1.072				2.242				1.964				1.173					0.7				0.6				0.6				0.6				0.6				0.8
	1.029				1.263				0.627				1.621				0.562				1.247					1				1.5				0.8				0.9				0.6				1.4
	0.887				0.915				1.51				1.386				2.46				1.813					1.5				0.7				0.9				0.9				1.3				2
	1.174				1.103				0.99				0.837				2.087				0.912					0.7				0.7				1.1				0.6				1.3				0.7
	1.449				1.281				1.327				2.029				2.253				0.892					0.8				0.6				0.9				0.7				2.8				1.5
	1.373				2.065				0.728				3.862				1.235				2.784					0.6				0.6				0.6				0.7				0.6				0.7
	0.987				1.162				1.57				1.582				2.314				1.682					0.6				0.7				0.7				0.8				0.6				1.3
	1.366				1.626				0.904				1.438				2.857				0.972					0.8				0.6				0.6				0.7				0.8				0.7
	1.359				0.862				1.388				1.863				2.052				1.04					2.8				0.7				1.1				0.6				0.6				0.6
	0.863				1.249				1.081				1.654				1.384				1.053					0.8				0.8				0.9				1				0.9				0.8
	1.603				1.346				0.968				2.081				1.056				1.541					1.4				0.7				0.6				1.2				0.9				1.6
	1.222				1.127				0.624				2.054				2.526				1.492					0.6				0.9				0.6				0.9				0.9				1
	0.75				0.845				0.749				2.651				2.297				1.447					1.2				1				0.8				1.9				0.9				0.6
	0.893				1.056				0.915				2.288				2.425				2.696					0.6				0.6				1.3				0.8				0.6				0.9
	1.036				0.999				0.838				2.278				1.17				3.279					0.8				0.6				1				2.1				0.6				0.6
	0.876				1.367				1.521				1.709				1.855				0.609					0.7				1				0.6				2.5				0.6				0.6
	1.17				1.125				0.824				1.337				3.507				1.77					0.8				0.6				0.8				0.7				1.1				0.6
	1.336				1.346				1.103				1.229				2.06				1.566					0.8				1				0.6				0.8				0.7				1.1
	1.456				1.071				0.954				1.988				2.489				2.455					0.6				0.8				1				0.8				1.4				0.7
	1.036				1.276				0.744				1.756				3.563				2.729					1				1.8				0.6				0.9				0.6				2
	1.725				1.19				1.103				1.84				2.757				1.028					1.1				0.8				0.7				1.5				1				1.4
	1.118				1.111				1.108				2.039				2.275				1.213					0.8				0.6				0.9				0.6				0.9				1
	1.274				1.278				1.06				1.224				3.31				2.065					1.9				1.1				0.6				1				1.4				1.2
	1.23				1.577				1.246				2.882				1.148				1.582					1.8				1.1				0.7				0.9				0.7				1
	1.058				1.284				1.091				2.044				1.617				2.201					0.7				0.7				1.1				0.6				1.1				1.1
	0.895				1.312				1.349				3.226				2.858				2.091					0.6				1.1				0.8				0.6				0.9				0.7
	1.259				1.117				1.09				1.835				1.602				2.009					0.9				0.6				0.8				1.5				1.2				1.1
	1.145				1.452				1.293				1.493				1.403				2.208					0.9				0.9				1.3				0.7				0.6				0.9
	1.225				1.526				1.062				1.808				2.259				1.291					0.7				2				1.1				0.7				1.1				1.2
	1.016				1.454				1.324				1.925				2.238				1.161					0.7				1				0.6				0.6				0.6				0.6
	1.167				1.047				1.377				0.634				3.375				2.235					1.4				0.6				1				0.6				0.8				1.7
	1.33				1.013				0.87				1.937				1.813				1.413					1.8				0.6				0.8				2.6				0.6				0.6
	0.938				0.977				1.527				1.303				1.373				0.829					0.8				1.2				0.7				0.7				0.8				1.1
	1.051				1.53				0.956				1.069				1.191				2.118					1.1				0.9				0.6				0.6				0.7				0.6
	1.394				1.118				1.593				1.394				2.13				2.674					0.6				1				0.6				0.6				0.7				0.6
	1.755				1.272				1.131				2.904				2.163				1.661					0.7				0.8				1				0.7				0.6				0.6
	1.264				1.096				0.988				3.168				3.028				1.505					0.6				0.7				1.1				1.1				0.6				0.7
	1.476				0.868				1.122				2.083				2.767				1.308					1.1				0.6				0.6				0.7				2.4				1
	1.297				1.455				1.057				1.943				1.53				2.183					1				1.2				2.1				1.2				0.9				0.6
	1.165				1				1.185				1.58				3.401				1.064					0.6				0.7				1.2				0.6				0.6				0.7
	1.233				1.025				0.92				1.718				0.794				2.215					2.6				1				0.8				1.7				0.7				1
	1.119				1.24				0.948				1.76				1.163				2.457					0.9				1.4				1.4				0.7				0.9				0.8
	1.283				1.361				1.064				2.477				3.231				2.325					0.6				0.7				1.3				1.1				0.6				0.7
	1.265				2.746				1.13				1.044				2.388				1.14					1.3				1.1				0.7				0.7				0.6				0.6
	0.998				1.973				1.415				3.028				1.022				1.478					0.7				0.7				0.6				0.7				0.8				0.6
	1.433				1.382				1.001				2.436				1.6				2.974					0.9				0.8				1				0.8				0.6				0.6
	2.478				1.495				0.855				2.726				2.384				0.7					0.6				1				0.6				0.9				1.7				0.6
	1.177				1.636				0.891				1.046				1.193				1.537					0.8				0.8				0.8				0.6				1.1				0.6
	1.331				1.72				1.216				0.754				1.849				1.792					0.8				0.6				1				0.6				2.1				1.4
	0.82				1.159				1.535				2.782				2.254				1.416					0.9				0.9				1				0.6				0.6				0.8
	1.076				0.931				1.344				2.721				3.212				2.051					0.8				0.7				0.6				0.8				1.1				1.8
	1.19				1.551				1.268				3.031				2.118				1.298					0.9				0.8				1.1				0.7				2				0.7
	1.624				1.786				1.017				2.746				0.852				1.703					0.9				0.7				0.6				0.6				0.8				2.5
	2.093				1.214				0.52				1.635				1.702				1.257					1.3				0.7				0.6				0.6				1.6				0.8
	0.631				0.549				1.13				2.511				1.259				0.92					0.8				0.6				0.6				2.7				0.7				0.6
	1.171				1.164				0.84				1.923				0.586				2.047					0.7				1				0.6				0.6				0.8				1.2
	1.447				1.102				1.13				2.178				2.013				1.416					0.6				0.9				0.9				2.6				1.5				0.9
	1.281				1.455				1.062				2.203				3.268				2.277					0.8				0.7				0.7				0.9				0.7				0.6
	1.14				1.283				1.313				2.217				2.005				2.05					0.8				0.9				0.7				1.6				0.8				0.8
	1.173				1.362				1.851				1.308				2.821				1.344					0.8				0.6				1.2				0.7				1				1.8
	0.938				1.669				1.242				2.031				1.66				3.057					0.6				0.6				0.7				0.6				0.8				0.6
	0.857				1.26				1.037				2.473				0.935				2.177					1				0.8				0.9				1.7				0.6				3.1
	1.207				1.924				1.458				2.255				1.062				1.589					0.6				0.6				1				0.7				0.6				0.9
	1.243				1.373				1.077				2.86				2.224				1.344					1.9				0.6				0.7				1.6				0.6				0.6
	1.279				1.895				1.156				1.099				1.232				0.888					1.8				0.6				0.9				0.7				1.2				0.6
	1.208				1.378				1.286				1.884				0.669				2.527					0.7				0.7				0.6				2				0.6				1.1
	0.957				1.308				1.011				1.756				1.377				2.76					1				0.7				0.7				1				0.6				0.6
	1.041				1.336				1.236				2.621				1.602				2.894					1.4				0.6				1.1				1.3				0.7				0.7
	1.527				1.274				1.174				2.14				1.561				1.354					2				0.6				1.5				1				0.6				0.8
	1.283				1.541				1.383				1.526				2.195				1.571					0.7				0.9				1.3				1				0.6				0.8
	1.339				1.89				1.491				2.074				2.091				1.084					1				0.9				0.8				0.7				0.6				0.8
	1.677				1.687				1.069				2.734				1.657				1.232					0.7				0.7				1.1				1				0.7				0.7
	2.518				0.984				2.142				2.496				1.53				1.297					0.6				0.8				0.6				0.8				0.6				0.8
	1.361				1.396				1.264				1.553				3.084				3.275					0.6				0.9				1.6				0.6				0.7				0.7
	1.257				1.325				1.289				1.983				2.571				1.777					1.1				0.6				2.4				0.9				1.4				0.7
	2.059				1.005				1.297				1.843				2.302				2.284					0.9				0.6				1.3				0.9				1.1				1.3
	1.286				1.162				1.233				1.205				1.938				1.493					0.7				0.7				0.6				0.6				0.6				0.8
	0.814				1.625				1.058				2.355				1.709				1.008					0.8				0.6				0.8				0.9				0.7				0.6
	1.383				1.392				1.333				2.445				1.019				1.083					0.6				0.9				0.8				1				0.6				0.7
	1.279				1.253				0.899				1.965				2.412				0.717					1				0.6				0.7				1.4				1.3				0.6
	1.204				0.939				1.408				2.081				2.697				1.917					1.2				0.6				1.1				1.9				1.6				1.2
	1.117				1.223				0.952				1.905				2.156				1.373					0.6				2.4				1.6				1.5				1.9				0.9
	1.077				1.229				1.147				2.591				0.66				1.89					0.6				1.7				0.6				0.7				0.6				1.4
	2.418				1.374				1.294				0.911				0.887				2.781					0.9				0.9				0.6				0.6				0.6				2.6
	1.1				1.035				1.025				2.279				2.685				1.477					0.6				0.6				0.6				0.6				1				1.3
	1.326				1.152				1.327				2.502				1.043				2.566					0.6				0.9				0.7				1.3				0.6				0.9
	1.227				1.522				0.949				2.176				2.867				2.845					0.6				0.6				0.8				1				1.4				1.8
	1.034				1.224				0.759				1.458				2.058				2.181					0.8				0.6				0.6				0.7				0.9				1.7
	1.765				2.072				1.165				1.83				2.638				2.157					0.9				0.6				1.2				0.7				0.9				0.8
	1.207				1.473				1.166				2.094				3.472				2.235					0.7				0.8				0.9				1.2				0.9				0.8
	2.748				0.923				1.268				1.717				2.363				2.94					0.9				0.7				0.8				0.6				0.6				2
	1.217				0.764				1.635				2.24				2.085				2.885					0.6				0.7				0.9				0.6				1				0.7
	1.617				1.389				1.252				1.917				2.322				0.805					0.6				0.6				1.2				0.7				0.7				0.9
	1.493				1.314				0.992				2.363				1.348				2.914					0.6				1.4				0.6				0.8				0.6				1.1
	1.567				1.83				1.574				2.576				0.888				0.959					0.7				0.7				2.2				1.4				0.6				0.6
	2.429				1.327				1.558				1.588				0.884				1.541					0.9				0.8				0.6				1				1.1				0.7
	2.077				1.329				1.461				2.076				1.268				2.563					0.6				0.8				1				1				0.8				1.2
	0.938				1.429				1.129				2.585				0.976				2.129					0.8				0.6				0.7				0.7				0.6				1.6
	1.305				0.922				1.116				2.358				1.297				2.567					0.7				0.7				1				0.8				0.6				0.9
	1.09				2.505				1.056				1.978				1.73				1.432					0.8				0.7				1.2				0.7				0.7				0.6
	2.638				1.027				0.757				3.541				1.518				3.329					0.7				0.9				0.7				1				0.6				2.2
	1.216				1.436				1.264				2.247				1.198				1.451					0.7				0.7				1.4				1.2				0.7				0.6
	2.182				0.685				1.855				2.198				2.923				1.931					0.7				0.6				0.7				0.6				0.6				0.8
	0.949				1.025				1.066				1.948				0.655				2.496					0.7				1.1				0.7				0.7				0.6				1.2
	0.905				0.63				1.296				1.109				0.682				3.037					0.9				0.6				0.6				1				0.6				1.9
	1.695				0.943				1.366				1.573				1.884				1.879					0.7				1.4				1				0.6				1.9				0.6
	1.943				0.739				1.229				2.365				1.779				2.818					0.9				0.7				1.6				0.7				0.6				0.8
	2.288				1.093				1.642				1.087				1.351				3.567					0.6				0.6				1.2				0.8				0.9				0.8
	1.256				1.048				0.689				1.087				2.189				3.762					0.6				1.1				0.6				1				0.6				1.2
	2.27				1.002				0.804				1.104				3.024				1.545					1.1				0.6				0.9				1.1				0.8				0.6
	2.549				1.12				1.629				0.797				1.786				1.632					1				0.7				0.7				1.3				1.1				0.7
	2.103				1.126				1.476				1.92				4.766				1.627					0.8				0.7				1				0.9				1.6				0.6
	1.647				1.229				1.441				1.027				1.628				1.929					1.9				0.6				1.2				0.8				0.6				0.7
	0.828				0.864				1.59				1.532				1.429				2.828					0.7				1.1				0.7				0.9				0.9				0.7
	1.639				1.437				1.167				1.17				0.952				2.679					1.4				0.7				1.4				0.6				0.8				1.3
	1.542				1.234				1.436				1.252				2.059				1.832					0.8				2.6				1.2				0.7				0.6				0.6
	1.087				1.28				1.513				1.466				1.425				3.31					1.4				1				2				2				0.7				1.2
	0.824				1.307				1.402				1.432				2.08				1.729					0.7				1				1.1				0.7				0.8				1
	0.903				1.112				1.422				0.654				1.14				2.169					0.6				0.9				0.7				0.9				0.8				0.7
	1.112				1.323				1.813				2.821				1.869				3.238					0.6				0.7				0.9				0.6				0.6				0.8
	1.532				1.322				1.139				1.495				2.824				2.372					0.6				1				0.8				1.1				0.6				0.8
	0.801				1.067				1.301				1.122				1.445				2.15					0.6				1.5				1.2				0.7				3				1.4
	1.498				1.072				1.332				1.601				1.544				2.384					0.6				0.9				0.9				0.6				2.3				0.7
	1.51				0.934				1.135				1.725				1.769				1.258					0.9				0.7				0.9				0.6				0.9				0.6
	1.785				1.342				0.968				1.141				3.257				2.546					1				1.8				0.7				1.1				1				2.2
	1.004				1.112				1.608				1.089				1.02				2.709					0.7				0.9				0.7				0.6				0.6				0.6
	1.099				1.06				1.231				1.096				1.082				0.952					0.8				0.9				0.9				0.7				0.7				0.6
	2.112				0.757				1.133				1.008				0.937				2.635					1.9				0.7				0.9				0.6				0.6				1.2
	1.079				1.186				1.2				0.745				1.903				1.219					0.9				1.1				1.3				0.8				0.8				0.9
	2.054				1.066				0.923				0.807				1.597				1.815					0.7				0.9				0.6				0.6				0.6				0.9
	1.459				0.944				1.059				1.133				1.576				2.804					0.6				0.8				0.7				0.6				0.6				1.4
	1.217				0.567				2.063				1.676				1.121				2.719					0.8				0.6				0.8				0.6				0.7				1.2
	1.269				1.247				1.165				0.837				0.806				2.971					0.8				0.8				0.8				0.6				0.7				1.6
	2.798				1.178				2.007				1.349				1.109				2.62					0.6				0.8				0.6				0.8				0.6				0.6
	1.374				1.511				0.725				1.723				1.264				1.98					1.5				0.9				0.6				0.9				0.6				1.4
	1.798				1.484				1.159				0.91				1.652				2.659					0.6				0.7				0.6				0.6				0.9				1.4
	1.596				1.479				1.357				1.647				0.823				2.703					0.6				0.7				0.6				1.6				0.6				0.8
	0.614				1.09				1.573				0.915				2.87				1.087					0.6				1.1				1.6				0.7				1.4				1.3
	1.33				1.192				1.062				2.426				0.743				2.561					0.6				1.3				0.9				0.7				0.7				1.2
	1.107				0.934				0.908				1.601				1.458				2.621					0.6				0.8				2.1				0.8				1.8				0.9
	1.123				1.398				1.143				2.094				1.034				1.96					1.1				1.3				0.8				0.6				1				0.9
	1.146				1.373				0.581				0.618				2.616				1.611					0.7				1.3				0.6				0.7				0.8				0.6
	1.232				1.157				0.804				2.475				2.025				2.242					0.9				1.2				0.8				0.6				1				0.8
	1.614				0.997				0.802				1.667				4.109				3.416					0.7				0.7				0.6				0.9				0.6				2
	1.462				0.804				0.748				0.922				1.093				1.623					0.6				0.6				0.9				0.7				0.7				0.8
	1.392				1.27				1.277				1.512				0.567				2.967					1				1.8				0.6				0.7				0.6				0.7
	1.213				1.026				1.586				1.317				4.196				2.751					0.7				0.7				0.6				0.6				1				0.6
	1.547				1.177				1.23				2.224				3.408				1.325					0.6				0.6				1.4				0.8				1.8				1.3
	1.539				1.65				1.065				2.242				2.26				1.265					0.6				1.1				0.6				0.6				0.6				0.6
	1.622				0.892				0.836				1.809				2.634				2.982					0.6				1				0.7				0.7				0.7				0.6
	1.239				0.996				2.247				2.169				1.37				2.519					0.7				2.5				0.7				0.8				1				1.4
	2.2				1.466				1.138				1.867				2.284				2.059					0.7				0.6				0.8				0.6				1.1				0.7
	2.177				1.154				1.168				1.446				1.475				2.945					1.9				0.6				0.7				1				0.8				0.8
	2.755				0.92				1.208				0.901				1.474				2.62					0.7				1.1				1.2				0.6				1.4				1
	1.379				1.216				1.015				2.471				1.631				3.328					0.7				0.9				0.9				1.1				0.6				0.7
	1.324				1.084				1.239				2.21				1.519				3.704					0.6				1.2				0.6				1				0.6				0.9
	3.132				0.961				1.21				1.246				0.872				2.734					0.7				0.9				1				0.9				0.8				1.7
	1.744				1.378				1.222				1.372				2.178				3.465					1.5				1				2.1				0.7				0.7				1
	1.54				1.021				1.429				1.881				3.127				2.293					0.8				0.6				0.8				1.3				0.9				0.8
	1.166				1.136				1.627				1.143				2.379				2.193					0.9				0.8				1				0.7				1.6				0.7
	1.151				1.065				1.987				0.754				1.19				2.132					0.9				1.3				1				0.6				0.6				0.6
	1.219				1.463				2.258				4.062				1.886				2.985					0.6				0.6				0.7				0.8				0.9				0.6
	1.675				1.476				1.447				2.461				1.494				3.188					0.6				0.7				0.9				0.6				1				1.8
	1.817				1.413				1.318				1.893				1.166				2.637					0.7				0.7				0.7				1.5				0.6				0.6
	2.549				1.064				1.111				0.913				2.705				1.316					0.6				0.6				0.7				0.9				0.9				0.7
	1.333				1.202				2.725				1.968				1.683				2.381					0.7				1				0.8				0.7				1.6				1
	1.071				1.489				1.125				2.267				0.925				2.653					0.9				1.2				0.6				1				0.6				2.1
	1.299				0.862				1.1				1.255				1.777				4.509					1.3				0.7				3.8				0.8				1.4				0.6
	0.807				1.181				1.798				2.397				2.386				1.087					0.7				0.7				0.7				1.2				1				0.7
	1.948				1.201				0.815				1.518				2.973				1.048					1.2				1.3				0.7				0.7				0.8				0.7
	1.518				1.1				0.982				1.109				1.893				1.103					0.8				1.3				1				0.6				0.6				0.7
	1.964				1.497				1.422				1.575				0.64				2.448					0.7				1				0.8				0.9				0.9				0.6
	1.254				1.444				1.269				2.65				1.195				3.052					0.6				1.5				0.7				1.3				0.6				0.9
	0.87				1.264				1.554				1.269				1.537				1.925					0.8				1				0.8				0.6				2.3				1.5
	1.566				1.219				1.018				1.017				1.187				2.252					0.6				2				0.7				0.7				0.8				0.8
	1.291				1.193				1.5				1.537				2.096				1.473					0.6				2.6				0.7				0.6				0.6				1
	1.197				1.349				1.185				1.287				1.002				3.592					0.7				0.7				0.8				0.8				0.8				1
	1.024				1.225				0.872				3.667				1.14				3.843					0.6				0.6				0.9				1.6				0.6				0.6
	1.088				1.522				0.821				2.574				2.135				2.411					0.9				1				0.6				1.2				0.6				0.8
	1.423				1.532				1.668				2.334				1.181				1.985					0.7				3.2				0.8				1.3				1				1.1
	1.242				1.232				1.225				2.279				1.436				3.332					0.8				0.7				1.3				0.7				1				0.6
	1.31				0.939				1.401				1.469				1.463				1.55					0.6				0.8				0.6				0.6				0.7				0.6
	1.403				0.809				1.18				2.789				1.266				2.128					0.7				1.3				0.8				1.1				0.8				0.6
	1.218				1.22				0.829				2.733				1.015				3.775					0.8				0.8				0.8				1.4				0.8				0.7
	0.903				0.886				0.796				1.044				1.4				2.461					0.7				0.8				0.7				0.8				0.7				0.9
	0.958				1.467				0.755				2.217				2.769				3.86					0.6				0.6				0.9				0.7				2.4				0.6
	2.383				1.057				0.779				2.093				0.809				3.216					0.7				1.1				0.9				0.7				0.7				0.6
	3.278				1.493				1.315				3.226				2.048				3.88					1				1				0.6				0.6				1				1.1
	0.806				1.056				1.304				1.63				1.911				1.611					0.6				0.7				2.7				1.1				0.9				0.7
	0.867				0.892				1.329				1.446				1.262				2.917					0.9				0.8				1.1				1.3				1.5				0.7
	0.635				1.196				1.364				1.774				1.691				4.026					0.6				1.4				0.6				0.6				1				0.6
	0.798				1.066				1.453				1.25				2.427				2.319					0.9				1.2				0.8				0.7				0.7				0.8
	1.12				1.427				0.936				3.165				2.24				2.079					1.4				1.1				1.6				1.7				1.3				1.2
	1.456				1.198				1.773				2.348				1.874				2.865					0.9				0.8				1.2				0.6				0.7				1.1
	1.204				1.199				1.391				1.609				3.989				2.488					0.6				1				0.8				0.6				0.6				0.6
	0.772				0.784				1.675				0.868				1.974				3.299					0.6				1				0.6				0.7				0.9				0.6
	1.175				1.131				1.481				1.949				1.89				1.004					0.8				1				0.7				0.9				1.7				0.8
	0.799				1.203				0.971				2.905				1.827				1.615					0.7				1.6				0.8				1.1				1				0.7
	1.566				1.172				1.038				3.242				2.012				0.789					1.2				0.7				0.7				1.4				0.6				0.6
	1.132				1.526				1.349				2.22				2.55				2.065					1.7				1				0.6				2.7				0.7				2.2
	1.683				1.283				1.309				2.355				1.944				1.279					0.9				0.7				1.1				0.9				2.6				0.7
	2.158				1.112				1.087				1.693				1.841				1.314					0.7				0.7				0.8				0.6				0.8				0.6
	1.088				1.031				0.704				2.197				1.029				1.229					0.7				0.8				0.8				0.6				0.6				0.7
	0.893				0.932				0.686				2.165				2.609				1.934					1				0.6				1.2				1.8				0.7				0.8
	1.306				0.833				1.519				1.984				2.259				0.908					0.8				0.7				0.6				0.8				1.1				0.6
	1.633				1.341				1.207				2.756				0.884				2.346					0.7				2.3				0.6				1.4				0.6				1.1
	2.76				1.109				1.982				2.021				1.696				2.397					0.7				0.6				0.8				2.7				0.6				3.5
	0.868				1.583				1.085				2.128				0.851				1.617					1.1				1				0.6				0.7				0.6				0.6
	1.304				1.285				1.331				2.231				4.539				1.534					0.6				0.8				1				1.3				1.4				0.6
	1.307				1.166				0.867				2.762				1.669				0.808					2				1.1				0.7				0.8				0.7				0.6
	0.859				1.317				0.762				2.951				1.669				3.19					1.2				0.9				0.7				1.2				1.3				1.1
	0.644				1.146				2.03				0.966				1.767				2.174					0.7				0.6				0.6				1.2				0.7				0.7
	0.587				1.468				1.177				2.745				1.277				2.458					0.6				1.6				1.1				0.8				1				0.7
	0.786				1.208				0.727				2.596				1.605				1.977					1.4				1.5				1.8				0.8				0.7				0.7
	1.037				0.942				1.328				1.909				0.575				1.202					1.1				0.7				0.6				2.2				0.6				0.7
	1.07				1.221				1.27				3.211				0.761				3.686					0.7				0.6				1				1.9				0.6				1.2
	1.381				1.043				0.987				2.737				1.634				4.644					0.6				1.1				0.6				0.9				1.1				1.4
	1.238				1.193				0.939				2.25				0.864				3.621					0.6				0.9				0.7				0.9				1				0.8
	1.477				1.524				1.2				1.461				3.133				3.454					0.6				0.9				0.7				0.8				0.7				1.3
	1.609				1.105				1.31				1.88				1.628				1.47					0.8				0.7				1.3				0.6				0.6				0.6
	1.338				1.088				1.461				2.672				1.491				3.436					0.8				1.2				0.7				0.9				1.5				0.8
	1.421				1.007				2.07				1.999				1.067				2.864					1.7				0.6				0.7				0.7				1				0.9
	1.275				1.213				1.35				1.817				2.316				2.18					0.6				0.7				0.7				0.6				0.8				1.2
	0.945				1.409				1.075				2.313				1.684				1.509					0.8				0.8				0.6				1.9				0.6				3.1
	1.232				1.022				2.188				2.183				0.922				3.767					0.7				0.8				1.5				1.3				1				0.9
	1.622				1.103				1.348				2.276				0.893				3.016					1				1.3				0.6				1.6				0.7				0.6
	1.759				1.399				1.275				2.542				0.867				1.852					1.4				1.6				0.7				0.7				0.6				0.7
	0.939				1.486				1.406				1.719				2.62				3.058					0.6				0.6				1.4				1.2				1.8				0.8
	1.121				1.295				1.068				2.256				1.974				0.873					1.9				2.2				0.6				3.3				1.1				0.7
	0.902				1.55				1.141				2.082				2.677				1.665					0.6				0.9				1.8				1				0.7				0.6
	0.954				0.754				1.147				2.465				1.696				3.109					1.2				0.6				0.8				0.8				0.8				0.6
	0.929				1.065				1.328				1.547				1.508				3.161					0.8				1				1.1				1.9				0.6				0.7
	0.795				1.017				1.367				2.316				1.242				2.323					0.6				0.6				1.6				0.6				0.8				1.8
	1.398				1.131				1.382				2.26				1.261				0.826					1.2				0.6				1.4				1.6				0.6				0.6
	1.319				1.009				0.411				0.905				0.732				3.657					0.7				2.3				0.6				0.7				0.8				1.4
	1.042				1.241				0.931				1.562				1.359				4.353					0.7				1.7				0.6				1.4				1.3				0.6
	1.071				1.6				1.288				2.782				1.037				0.804					1.9				1.2				0.6				0.6				0.6				0.6
	1.157				1.287				1.298				1.927				1.445				2.062					1				0.6				1.9				1.2				1.1				0.7
	1.111				1.182				1.704				2.085				2.705				1.932					0.6				0.7				1				0.6				0.9				0.9
	1.122				0.974				1.052				2.853				1.895				3.374					0.9				0.6				1.2				0.7				0.7				0.7
	0.766				1.5				1.08				1.566				2.929				3.114					0.6				1				0.7				1.4				1.1				1.9
	1.286				0.82				1.36				2.613				0.896				2.631					0.8				0.9				2.1				2.7				0.7				0.7
	1.175				1.186				0.843				2.482				0.83				2.129					0.6				0.6				0.7				0.8				0.6				1.2
	1.119				1.289				1.39				2.773				3.263				2.423					0.8				1.9				0.7				0.7				0.8				1.1
	1.01				2.847				0.981				2.433				1.178				2.59					1.2				0.6				0.7				1.4				0.7				0.6
	0.941				1.325				1.144				2.077				3.606				1.651					0.9				0.6				0.6				1				0.6				0.6
	1.59				1.907				2.422				1.689				0.736				0.999					0.6				0.6				0.8				1.5				0.9				0.6
	1.213				1.873				1.167				2.683				0.698				2.803					0.7				0.7				0.7				0.8				0.6				1.9
	0.88				1.194				1.303				2.529				1.245				2.393					0.7				0.6				1				1				0.6				1.7
	1.254				0.733				1.491				3.031				1.184				3.15					0.9				1.1				0.6				1.3				0.8				0.8
	1.173				1.434				0.91				2.261				1.059				1.539					1.5				0.7				0.6				0.6				0.6				0.8
	1.039				1.516				1.468				2.195				1.528				2.464					2				1				1				1				0.6				0.6
	1.427				1.308				1.761				1.344				1.029				0.755					0.9				0.9				1.9				0.8				0.8				0.7
	1.441				2.373				1.469				1.491				2.181				3.198					1				0.7				1.1				1.4				0.9				0.8
	1.538				1.193				1.83				2.137				3.138				2.512					0.7				0.9				0.7				0.6				1.8				0.9
	0.827				1.016				1.518				2.164				1.838				2.777					0.7				0.6				0.9				1.3				1.1				0.6
	1.178				2.126				0.945				2.458				2.549				3.163					2.2				0.9				1.2				2.2				0.6				0.8
	0.813				1.837				1.121				2.691				2.026				0.771					0.7				1				1				2				0.6				0.7
	1.169				1.167				0.973				1.754				2.13				2.568					0.6				1.1				1.1				0.9				0.7				0.6
	1.35				1.393				1.076				1.524				2.171				0.855					1.3				0.9				1.4				0.6				3				0.6
	1.444				1.063				1.395				2.177				1.851				2.464					0.7				1.6				0.8				0.7				0.8				0.9
	1.129				1.184				0.991				1.31				1.408				3.323					0.8				1.8				1				0.6				1.1				0.8
	1.241				0.994				0.983				2.85				2.602				2.365					1.2				1.3				0.6				0.7				3.7				1.3
	1.71				1.003				1.362				2.631				2.59				2.774					2				1.2				1.8				0.7				1.3				0.8
	1.073				1.288				1.072				2.475				1.567				2.389					2.3				1.1				1.3				1.9				0.8				0.7
	1.816				1.102				1.619				1.308				2.75				2.749					1.9				0.6				0.9				1.2				0.6				1.1
	1.51				0.674				1.389				2.482				1.878				2.531					0.9				0.6				0.7				1.5				1.6				1.4
	1.073				0.721				1.26				0.905				1.489				2.866					0.8				0.6				0.8				0.6				1.9				0.7
	1.128				0.84				1.262				1.695				2.342				1.768					0.8				0.8				1.1				0.8				1.2				0.9
	1.234				1.187				0.98				2.371				1.46				3.573					1.1				1.4				0.9				1				1.9				0.7
	1.271				1.31				1.548				1.901				3.077				2.819					0.6				1				0.9				1				0.9				1
	1.107				1.012				0.985				0.872				0.965				3.519					0.6				0.6				1.2				0.6				0.8				0.9
	1.314				1.275				1.654				2.364				1.219				0.655					1				2.8				0.7				1.1				0.9				0.6
	1.252				1.506				1.552				1.487				1.424				2.793					0.6				0.8				0.6				0.8				0.7				0.9
	0.835				1.16				1.002				1.17				1.577				3.061					0.6				0.7				0.8				0.7				1				1.2
	0.722				1.013				1.053				0.74				2.3				3.197					0.7				0.7				0.7				0.6				1.5				0.7
	1.525				1.353				1.255				1.365				1.801				1.212					1				0.7				1.2				0.8				1.6				0.6
	1.493				1.52				1.034				2.56				1.385				3.483					0.9				0.6				0.8				1.3				0.6				1.9
	0.663				1.248				1.372				2.215				4.121				3.057					0.7				0.8				1.5				0.7				1.5				0.6
	0.825				0.833				1.133				1.682				1.176				3.432					0.9				1.6				0.6				0.6				0.9				1.3
	0.976				1.053				1.571				2.756				1.773				3.726					1				0.7				0.6				0.8				0.8				0.7
	0.7				1.107				1.154				2.807				1.042				3.114					0.7				1.1				0.6				0.7				0.7				0.9
	0.966				1.349				1.534				2.559				1.574				2.817					0.7				1.3				0.9				0.7				0.6				1.3
	0.592				1.479				2.058				0.842				2.396				3.785					0.6				1				0.9				0.7				0.6				0.9
	0.894				1.182				1.521				1.464				1.24				1.24					0.6				1				0.6				0.6				0.6				0.7
	0.895				0.792				1.142				1.675				1.408				2.274					0.8				0.7				0.7				0.8				0.6				1.3
	0.759				1.381				1.392				2.277				1.411				2.12					1				0.9				0.9				1.4				1.1				0.7
	0.795				1.355				1.023				1.475				1.656				1.51					0.7				1				1				0.6				0.6				0.7
	1.346				1.289				1.578				1.998				1.533				2.097					1.3				0.7				0.6				0.7				1.9				2.2
	0.747				0.842				1.729				0.494				2.696				2.202					0.6				0.6				0.8				0.6				1.2				0.6
	0.846				1.374				3.387				1.778				1.051				3.627					0.7				0.6				0.7				0.9				0.8				0.6
	0.75				1.399				1.247				3.063				3.16				1.367					0.8				0.8				0.9				1.1				0.6				0.9
	1.61				1.342				1.187				2.531				2.577				2.231					0.8				1.6				0.8				0.7				2.2				1.2
	1.179				1.085				1.228				2.121				2.911				2.301					1.4				0.6				3.1				1				0.7				1.1
	1.826				0.846				1.005				2.241				0.974				0.923					0.6				1.1				0.6				1				0.6				0.6
	0.679				0.865				1.26				1.823				1.858				2.325					0.7				0.6				1.6				1.2				0.7				0.6
	1.827				1.361				1.372				4.548				0.604				2.83					1.6				1				0.7				0.6				0.6				1
	1.104				1.229				1.572				2.784				1.749				2.559					0.7				1				1.4				1.2				1				0.6
	1.129				1.19				1.016				0.834				2.054				1.92					2				1.1				0.7				0.6				0.6				1.9
	1.164				1.112				1.512				2.791				1.286				2.274					1.1				1.5				0.7				2.3				0.7				0.6
	1.522				0.87				1.87				1.691				3.279				2.18					0.7				0.6				0.8				0.6				0.9				0.6
	1.294				1.416				1.175				2.581				3.021				1.624					0.7				1.9				0.9				1.9				1.2				0.7
	1.743				1.748				1.28				1.608				2.268				0.936					0.7				0.7				0.6				0.8				0.8				0.6
	1.545				1.305				1.19				0.9				2.254				1.323					0.6				0.6				0.7				0.6				1				0.7
	1.688				1.934				1.647				1.619				2.876				1.742					0.6				0.8				0.6				1.3				1.1				1
	0.875				1.337				1.393				2.147				1.353				4.447					0.7				0.6				1.3				0.6				1.3				0.7
	1.436				1.422				1.271				2.023				1.463				1.947					1				0.7				2.5				0.8				0.9				0.6
	0.908				0.993				1.392				2.295				3.505				2.106					0.6				0.8				1.3				0.6				0.8				1.2
	0.923				1.388				1.431				2.554				3.231				2.469					1.7				2.1				0.6				1.5				0.7				0.8
	1.256				1.211				0.95				2.668				2.143				0.828					0.7				0.7				0.8				3				0.9				0.6
	1.438				1.222				1.31				1.599				1.556				3.671					0.7				0.7				0.7				0.6				0.6				2.4
	1.541				0.925				1.384				1.513				2.091				1.918					0.6				0.6				0.7				0.6				1.1				0.8
	1.501				1.155				1.233				2.018				2.266				2.962					1.4				1				1.1				0.7				0.6				1.5
	1.374				0.984				1.315				1.356				0.807				3.109					0.7				0.9				1.2				1.9				1.3				1.1
	1.291				1.176				0.565				0.504				1.748				2.889					0.6				1.5				0.7				0.6				1.2				0.7
	1.219				1.285				1.32				2.521				2.857				2.899					0.6				0.6				1.1				2.2				1.7				0.6
	1.539				1.372				1.231				2.217				1.985				2.761					1.1				1.3				0.7				1.7				0.7				1.2
	1.291				1.009				1.163				2.117				1.578				2.325					0.7				0.6				1				0.8				0.7				2.3
	1.344				1.323				2.421				2.609				1.603				1.15					1				0.7				1.6				0.7				0.8				0.6
	0.963				0.973				1.852				2.172				2.432				2.976					0.6				1.1				0.6				1.4				0.8				1.2
	0.745				0.935				1.183				1.582				0.566				1.455					0.7				0.8				1.6				1.9				0.6				0.6
	0.999				0.842				1.297				1.663				2.79				1.437					1.5				0.6				0.6				0.9				0.8				1.2
	0.923				1.307				1.131				1.397				3.645				1.854					0.6				1				1.1				1.3				1.6				0.7
	1.034				1.42				1.443				1.622				0.963				2.788					0.9				0.9				0.6				0.7				0.6				0.8
	1.4				1.244				1.456				2.141				1.391				4.213					1.2				0.7				0.6				0.9				0.7				0.7
	1.193				1.358				1.907				1.425				1.355				3.722					1.8				0.8				0.6				0.8				0.7				0.9
	1.214				1.463				1.53				1.208				3.24				3.237					1.5				0.6				1.6				0.6				2.2				0.6
	0.823				0.893				0.981				2.123				3.87				1.446					0.6				1.1				1.2				1.4				0.6				0.7
	1.178				1.436				1.307				1.661				1.918				1.837					0.8				0.7				1.3				0.9				0.8				0.7
	1.525				0.871				2.585				1.934				3.781				3.112					0.9				0.9				1.2				1.2				0.6				0.8
	1.039				1.23				1.251				2.883				1.128				2.004					0.6				0.7				1.1				2.8				0.8				0.7
	1.026				1.175				1.217				1.662				1.319				2.83					0.8				0.6				0.6				0.8				0.7				1.7
	1.278				0.944				1.409				2.424				2.82				1.882					1.3				0.7				1.9				2.1				1.3				0.8
	1.499				1.551				1.272				1.43				0.774				2.109					0.9				0.7				0.9				0.7				0.6				0.7
	0.99				0.873				0.735				2.524				2.439				2.99					0.9				0.8				0.6				0.7				1.1				0.8
	1.43				1.027				1.443				1.348				2.59				2.742					0.7				0.9				2.1				0.6				0.7				0.7
	1.355				0.952				1.104				1.199				1.65				1.66					1.6				0.6				1				1.4				0.6				0.6
	0.687				1.89				1.764				2.608				2.039				2.323					0.7				0.8				0.6				1.8				1.7				0.6
	1.469				1.313				0.885				0.889				1.196				2.963					1.6				2.4				0.9				0.6				0.6				0.6
	0.956				0.733				1.467				2.529				1.322				2.054					0.6				1				2.1				3.3				1.5				0.6
	1.067				0.739				0.635				2.417				1.013				3.097					0.9				0.6				0.7				2.9				0.6				0.6
	1.252				1.06				1.379				1.884				1.728									0.6				1.1				1.2				0.9				0.7
	1.46				1.427				1.311				2.36				2.074									0.9				1.2				1.3				1.5				1.6
	1.408				1.288				1.232				1.213				3.421									0.6				0.9				0.6				1.9				2.3
	1.256				1.11				1.611				2.42				2.528									0.7				1.3				0.6				1				0.7
	0.703				1.116				1.622				1.728				3.622									0.7				2.1				0.7				0.6				0.8
	1.24				1.252				1.346				2.544				1.443									0.7				1.7				1.1				0.7				0.6
	1.24				1.082				1.428				2.892				1.215									1.5				0.9				1				0.6				0.7
	1.299				1.256				1.581				2.537				1.299									0.9				0.6				1				2.1				0.7
	1.022				0.876				1.258				2.381				2.267									1.2				0.7				0.6				1.5				1.2
	1.263				3.087				0.998				1.876				2.298									1				1				0.7				1.1				0.8
	1.866				1.01				1.339				2.509				1.132									1.5				1				0.7				0.8				0.8
	1.502				1.271				1.282				2.049				2.218									0.7				1.6				1.1				0.6				4.1
	1.169				2.007				1.081				2.356				1.564									1				1.2				0.9				1.4				1.2
	0.863				0.627				1.528				4.056				2.44									0.8				0.6				0.6				0.6				0.7
	1.198				1.27				1.711				3.109				2.272									0.7				1				0.6				1.2				0.6
	0.891				1.465				1.143				2.15				1.62									0.8				0.7				1.1				1.4				0.7
	1.684				0.954				1.211				2.583				2.721									0.7				0.7				0.6				0.8				1.4
	1.388				1.562				1.375				2.216				5.208									0.7				2				0.8				1.1				1.5
	1.438				1.546				1.276				2.598				1.992									1				1.1				1.2				1				1.2
	1.159				1.459				1.033				2.624				1.467									1.8				0.7				0.6				2				1.1
	1.019				1.385				1.506				2.347				2.094									1.1				1.9				0.6				0.9				0.8
	1.304				0.959				1.039				2.629				1.379									0.7				0.6				0.6				1.3				0.8
	1.303				1.496				1.179				0.514				1.587									0.6				1.3				0.7				0.6				1.2
	1.111				1.561				3.891				1.669				0.861									1.2				1.3				0.6				1.3				0.8
	0.866				1.156				2.668				1.477				1.651									0.9				1				1.4				0.7				1
	2.033				1.089				1.322				2.136				1.512									1				1.3				1				1				0.6
	0.901				2.058				1.331				1.86				0.664									0.8				1.1				0.7				1.4				0.6
	1.574				0.913				1.475				2.384				1.084									0.6				1.1				1.8				1				0.6
	1.102				0.797				1.21				1.582				0.924									0.8				0.7				1.3				0.9				0.6
	1.002				1.491				1.469				1.058				2.437									1.2				1.2				0.7				0.7				1.5
	1.178				1.592				1.027				0.957				2.068									1.7				1.3				2.8				0.8				0.7
	1.189				1.3				1.177				2.641				2.176									0.6				0.7				0.6				1				3.2
	1.402				0.983				1.229				2.629				1.017									0.7				1.4				0.9				1.1				0.6
	0.768				1.006				1.61				1.49				4.741									1.1				0.7				1				1.1				1.1
	0.83				1.16				1.842				2.455				0.939									0.9				1				0.8				1.3				0.7
	1.214				1.137				1.157				2.245				1.448									0.7				1				0.7				1.4				0.6
	0.698				1.301				0.991				3.121				2.028									0.6				0.6				1				1.3				1.1
	1.611				0.991				1.429				0.926				3.354									0.7				0.9				0.6				0.7				1.8
	1.196				1.531				1.435				1.329				1.308									1				1				1.3				1.3				0.6
	1.064				1.346				1.188				1.642				0.833									1.4				0.7				0.6				0.7				0.6
	0.946				1.227				0.902				1.329				0.961									0.6				0.6				0.6				1.1				0.6
	1.43				1.365				1.332				2.324				1.969									0.6				0.6				0.8				1.2				0.6
	1.007				1.391				1.518				2.153				1.757									0.7				1.1				0.8				0.7				1.3
	0.875				1.435				1.072				1.815				1.039									0.9				1.6				0.8				0.7				0.6
	1.109				1.155				1.109				2.455				0.945									1.6				0.6				0.7				1.8				0.6
	1.237				0.992				0.927				1.593				1.722									1.6				1				0.7				0.6				0.7
	1.962				1.991				1.853				1.813				0.917									0.7				1.2				0.6				2.9				0.6
	1.361				1.08				1.312				1.833				1.983									1.1				0.9				1.2				0.6				0.9
	1.84				0.813				1.273				1.971				2.077									0.9				0.9				0.6				0.7				1.9
	1.684				1.223				1.522				1.058				2.181									0.6				0.6				1				0.8				0.7
	1.599				1.18				1.53				1.708				2.425									1.4				0.7				1.2				0.6				0.9
	0.912				1.682				1.056				1.697				1.382									0.8				0.9				1.1				0.6				0.8
	1.187				1.482				0.753				2.424				1.932									1				1.7				0.6				1.9				0.6
	1.453				1.479				1.422				2.352				1.895									2.1				1.2				0.6				0.7				1.3
	1.381				1.599				1.326				2.935				3.049									1.5				0.8				0.7				1.2				1
	1.508				0.993				0.762				2.79				2.616									1.6				1.5				0.6				1				0.8
	0.975				1.045				1.381				2.101				1.33									0.9				0.9				1.4				0.6				1.3
	1.386				1.154				2.228				1.717				1.336									0.7				1.2				0.6				1.1				0.6
	0.966				1.444				1.244				1.458				2.375									1.4				1				1.2				2.2				1.5
	1.181				1.314				0.981				1.012				1.795									0.7				0.9				1.1				1				1.1
	1.017				1.363				1.285				1.182				1.438									0.8				0.8				0.8				0.6				0.7
	1.406				0.696				1.254				2.5				3.015									0.7				1.5				1.5				0.6				1.2
	1.059				0.815				0.905				0.539				0.865									1.7				0.6				0.8				0.7				0.6
	1.031				0.714				1.158				2.181				0.763									1.1				0.8				0.9				0.6				0.8
	1.196				1.343				1.289				1.789				0.954									0.9				1.1				1.4				0.6				0.7
	0.865				1.261				0.939				1.452				1.18									0.7				1.9				1.2				0.6				0.6
	1.355				1.055				0.823				2.401				1.844									0.6				0.8				1.9				0.8				0.6
	1.596				0.81				0.837				1.135				1.759									0.7				0.6				1.2				0.7				0.7
	1.128				1.363				0.836				2.35				2.193									0.6				2				0.8				1.4				2.2
	1.498				1.543				1.535				2.724				2.623									1				0.7				0.7				0.8				1.2
	1.38				1.336				1.679				2.342				2.629									0.8				1.1				1.1				1.4				1.2
	0.771				1.612				1.518				2.591				1.589									0.6				1.7				1				1.2				0.6
	0.878				1.363				1.268				1.854				2.99									1.3				0.7				0.9				0.8				0.9
	0.727				1.356				1.199				1.913				1.062									0.6				0.7				0.9				1.4				0.7
	1.505				1.299				1.273				1.379				2.077									0.6				1.3				0.9				1.3				0.6
	1.174				1.095				2.72				1.796				2.289									1.2				0.8				0.8				2.6				0.9
	0.897				1.339				1.369				1.942				2.72									0.6				1.2				1.2				1				0.6
	1.165				2.777				1.23				2.066				3.326									1.8				0.6				0.8				2.2				0.6
	1.175				1.267				1.224				2.084				1.383									1.2				0.7				0.6				0.8				1
	0.877				1.274				0.819				0.943				0.995									1.4				0.6				1				0.7				0.7
	1.008				1.233				0.832				2.67				2.443									0.9				1.8				0.7				0.8				1
	1.173				1.282				0.939				1.029				2.375									0.6				1.3				0.7				1.2				1.2
	2.168				1.507				3.896				1.433				1.935									1				0.9				0.7				0.6				0.9
	2.112				1.326				1.308				1.614				2.779									1.9				0.8				2				0.9				1.1
	1.268				1.342				1.223				2.022				1.566									0.6				1.6				0.7				1.9				1.9
	1.255				1.039				1.288				1.843				1.774									0.9				1.4				0.8				0.8				0.6
	0.808				0.963				1.748				1.154				2.335									0.7				0.8				0.7				0.7				0.8
	1.03				1.945				1.1				2.173				2.841									1.1				0.6				2.2				2				1.9
	1.194				1.302				1.179				2.029				2.17									0.6				1.8				2				1				1.3
	1.462				1.508				1				1.252				2.493									1.1				0.7				0.6				0.9				1.2
	1.041				1.16				1.754				1.49													0.7				0.9				0.7				0.6
	1.122				1.487				1.117				3.578													0.8				1				0.6				0.6
	1.076				1.005				0.807				1.463													1.1				0.6				0.6				0.7
	1.436				1.07				0.841				0.979													0.9				0.6				1				0.7
	1.397				1.286				1.121				2.976													0.9				0.6				0.6				0.7
	1.306				1.599				1.209				1.549													1.4				0.7				0.8				1.3
	1.226				0.971				1.503				2.824													0.7				0.6				1				0.7
	1.135				1.826				1.138				2.292													0.6				0.7				0.7				1.4
	1.187				2.144				1.403				2.249													1.6				0.7				1.9				1
	0.815				1.88				1.166				2.126													0.6				0.8				1.1				1.5
	0.849				1.454				0.932				1.959													0.9				0.6				0.9				1
	1.067				1.272				1.223				3.054													0.7				1				0.6				1.2
	0.636				1.158				0.623				2.507													0.6				0.7				0.6				1.3
	1.751				1.853				1.5				2.164													1.2				0.6				0.6				0.7
	1.362				1.071				1.489				2.733													0.6				0.6				0.7				0.8
	1.441				1.329				1.427				2.217													1				0.6				2.4				1.2
	1.018				1.226				1.296				3.444													3.9				0.6				0.9				0.6
	1.602				1.123				1.533				2.759													0.6				0.9				0.9				1.3
	1.259				1.536				1.507				1.299													0.7				1				1.4				1.2
	0.878				1.296				1.026				1.093													0.7				1.1				1.3				0.7
	1.171				2.604				0.995				3.197													1.4				0.6				0.6				0.6
	0.92				1.587				1.286				2.996													1				0.8				0.6				1.8
	1.418				1.322				1.52				2.908													1				0.8				0.6				1.7
	1.254				1.411				1.205				2.383													0.7				0.8				0.7				2
	1.62				1.136				0.663				2.394													0.6				0.6				0.7				0.8
	1.151				1.112				1.417				1.81													1.4				1.1				0.9				0.9
	1.914				1.044				1.474				2.519													2				0.6				1.3				1.4
	1.569				1.356				1.241				1.387													0.7				0.8				1				0.9
	1.054				1.19				1.313				2.417													0.7				0.7				1				1
	1.09				1.301				1.206				2.615													1.2				0.8				1.8				0.6
	1.335				1.374				1.313				2.162													0.6				0.8				1.1				0.7
	1.334				1.152				1.446				2.099													0.8				0.8				1				1.3
	0.945				1.369				1.33				2.237													0.6				1.1				0.8				1.2
	0.835				1.242				1.475				2.556													0.6				1.2				0.6				0.7
	1.15				1.369				1.492				2.454													1.6				0.8				0.7				1.3
	0.848				1.431				1.393				1.178													0.6				0.8				0.8				0.8
	1.249				1.191				1.372				2.002													0.9				1.1				0.8				0.9
	1.334				1.272				0.98				1.78													1.2				0.8				0.8				1.2
	1.188				1.436				0.912				2.527													0.9				2.2				0.8				0.7
	0.947				1.273				2.4				1.597													0.6				0.8				0.7				0.6
	0.716				0.833				0.772				1.85													0.8				0.6				0.6				1.1
	1.342				1.345				1.487				1.667													0.6				0.8				1.8				0.9
	1.292				1.261				1.17				3.238													1.6				0.9				0.6				0.7
	1.246				1.416				1.253				1.686													1.2				0.6				0.7				1.2
	1.567				1.329				1.464				1.398													1				1				1.1				0.9
	2.221				1.223				1.494				1.405													0.7				0.7				1.3				0.9
	1.17				0.951				1.806				1.615													0.8				0.7				0.8				0.9
	1.118				1.378				1.632				1.895													0.9				1.6				1.7				0.6
	1.168				1.792				0.573				1.222													0.7				0.7				0.8				0.7
	0.765				1.792				1.241				1.13													0.6				0.6				0.6				0.7
	2.664				1.698				0.955				0.802													0.6				0.8				0.6				0.7
	1.234				1.232				1.299				1.866													3				0.9				0.6				1.3
	0.679				1.339				1.714				1.663													0.6				0.7				0.9				0.7
	1.223				1.634				1.727				1.561													0.6				0.6				0.7				0.6
	1.342				1.006				1.378				0.962													0.9				0.8				1				0.8
	1.588				0.95				1.385				1.803													0.6				0.7				1.5				0.8
	1.593				1.164				1.251				1.758													0.6				0.7				0.7				0.7
	1.337				1.087				1.493				2.43													0.8				0.6				0.9				1.4
	1.037				1.659				1.278				2.919													0.8				0.7				0.8				1.4
	1.415				1.019				1.054				1.747													2.2				1.2				0.8				1
	1.383				1.497				1.441				2.183													0.7				1.3				0.7				0.6
	1.018				1.459				1.329				2.352													1.6				0.9				0.8				1.2
	0.818				1.057				1.181				2.382													0.8				0.7				0.7				1.2
	2.625				1.207				1.282				2.185													0.7				0.6				2.3				2.1
	1.286				1.325				0.914				2.557													0.7				0.7				0.9				0.7
	1.64				1.129				1.212				1.148													1.1				0.7				0.8				0.7
	0.996				1.377				1.088				2.807													0.6				1.2				0.6				0.6
	1.061				1.287				1.281				2.269													0.9				0.9				1.5				0.7
	0.708				0.87				1.252				1.924													0.6				0.7				0.6				0.8
	1.958				1.624				0.834				1.132													0.6				2.4				0.6				0.6
	1.602				1.367				0.842				0.728													0.8				0.7				0.8				0.7
	2.682				0.852				1.071				2.037													0.7				0.6				0.9				0.6
	1.151				1.05				1.411				2.448													1.3				1.1				0.8				0.7
	2.096				0.717				1.174				3.262													1.3				0.8				0.7				1.6
	1.111				1.122				1.027				3.119													1.5				0.6				0.6				0.7
	1.028				1.369				1.119				1.609													0.7				1				0.6				0.9
	1.474				0.912				1.254				2.268													1.1				0.6				1				1
	0.99				1.331				1.288				1.62													0.9				1				0.9				0.8
	1.418				1.079				1.102				2.071													0.9				0.6				0.7				0.9
	0.727				1.357				1.046				1.851													0.6				0.8				1.1				0.6
	1.429				0.838				1.58				1.02													1.4				0.9				0.6				0.6
	1.213				0.884				1.442				1.318													0.8				0.6				1.7				0.6
	0.821				1.524				1.21				2.632													0.8				0.9				1.1				0.7
	1.061				0.786				1.477				1.646													0.9				0.6				0.6				0.7
	1.307				1.3				1.642				2.428													0.7				1.1				0.9				0.6
	1.187				1.012				0.931				2.989													0.6				0.6				0.6				1
	1.052				1.127				0.97				1.453													1.1				0.6				0.7				0.7
	1.213				1.865				1.596				2.675													0.8				1.2				0.7				1
	1.181				1.241				0.888				2.398													0.6				0.9				0.7				0.6
	1.098				1.661				1.172				1.388													0.6				1.9				0.6				0.8
	1.904				1.298				1.262				3.257													0.6				0.8				1				0.6
	1.605				0.711				1.443				0.959													0.7				0.6				0.6				0.6
	1.393				2.794				0.903				1.252													1				0.7				0.7				0.6
	1.598				1.352				1.444				1.861													1.4				1.7				0.6				0.8
	0.866				1.914				1.261				1.601													1.1				0.8				0.7				1.2
	1.231				0.946				1.308				1.739													0.9				1.6				1.8				0.6
	1.33				1.554				1.436				2.293													0.9				0.9				0.6				0.9
	1.074				2.952				0.906				1.722													0.6				0.6				1.1				2.2
	1.478				0.931				1.257				1.834													1				1				1				1
	0.686				1.22				1.231				1.696													0.6				1.2				1.2				0.9
	2.497				1.418				0.945				1.566													0.6				0.7				1.6				0.6
	1.088				1.36				1.107				2.378													1.2				0.6				0.7				1.6
	0.82				1.241				1.403				2.339													0.7				0.6				0.7				0.8
	1.372				1.092				1.583				2.242													0.7				1				0.8				0.9
	1.075				1.426				2.753				1.87													0.6				1.1				0.8				0.6
	1.064				1.659				1.359				1.68													1				1.1				0.8				0.6
	1.385				0.878				1.066				1.895													0.9				0.6				0.8				1.1
	1.105				1.696				1.3				1.744													1				0.6				0.7				1.3
	1.684				1.188				1.145				2.886													0.6				0.7				0.6				0.9
	1.301				1.341				1.352				3.274													0.8				1.4				1.9				0.9
	0.885				1.189				1.682				1.262													0.7				0.9				0.6				0.8
	1.725				1.143				1.056				1.534													1.3				1.1				0.6				0.6
	2.569				1.517				0.872				2.296													0.7				1.3				0.7				0.6
	1.208				1.619				2.976				2.113													1.7				0.6				0.7				0.6
	0.908				1.294				1.857				1.086													0.7				1.6				0.7				1
	1.965				1.561				0.723				1.853													0.7				1				0.8				1.1
	1.091				1.477				1.591				2.859													0.6				1.2				1				1.1
	1.256				1.599				1.555				0.76													0.8				0.8				0.6				0.6
	1.231				1.913				1.354				2.338													1.1				0.6				0.7				2.3
	1.192				1.604				1.185				2.68													0.8				0.8				0.6				1.2
	1.1				1.149				1.213				1.071													1.2				0.8				1.1				0.6
	0.853				1.164				0.883				0.986													0.9				0.6				0.6				0.6
	0.732				1.48				1.27				2.839													1				0.7				0.7				0.9
	0.832				1.561				1.519				1.147													0.7				1				0.6				1.2
	1.073				1.04				1.071				1.646													0.8				0.6				0.8				1.3
	0.936				1.327				1.533				1.293													2.7				0.8				0.8				0.9
	0.815				1.493				1.309				1.477													0.8				0.6				1.1				0.7
	1.062				1.327				0.678				0.807													0.6				1.3				0.6				0.9
	1.191				2.066				0.997				2.971													2.3				1.6				0.8				1
	1.086				4.04				1.684				2.276													0.9				0.6				1.1				1.2
	1.372				1.778				1.733				1.969													0.7				0.6				0.7				0.6
	0.9				1.372				1.291				2.493													0.7				0.9				1.1				1
	1.733				1.192				1.725				2.065													0.9				0.9				0.7				0.8
	1.271				1.088				0.967				2.367													1				0.6				0.6				1
	1.063				1.493				1.439				2.916													0.9				0.8				0.7				1.5
	1.112				1.765				1.515				2.824													1.1				2				2				1
	0.998				0.803				1.525				3.07													1				1				0.8				1.6
	0.904				1.443				1.137				2.442													1				1.3				1.1				1.4
	1.399				1.594				0.705				2.697													0.6				0.7				0.6				0.8
	1.534				1.659				1.244				3.043													0.6				0.8				0.8				0.7
	1.832				1.443				1.387				2.193													0.9				3.5				1.6				1.7
	1.208				1.69				1.663				0.656													0.7				0.8				0.6				0.6
	1.973				1.24				0.855				0.966													1				2.9				0.8				1.5
	1.529				1.45				1.265				0.851													0.9				0.8				0.8				0.6
	1.719				1.349				1.005				1.896													0.7				2.6				0.7				1
	1.225				1.455				2.257				2.509													1.2				2				1				0.6
	2.043				1.727				1.741				1.602													1.1				0.9				1.5				0.8
	0.801				1.949				1.148				3.335													0.6				1.6				0.9				1
	1.121				0.902				1.021				3.096													0.7				0.8				0.9				1.1
	1.186				1.79				1.064				3.006													0.6				0.8				0.7				1
	1.029				1.093				1.317				2.119													0.8				0.6				0.6				1
	1.088				0.804				1.178				0.861													1				0.6				0.6				0.6
	1.283				1.658				1.139				2.989													0.6				0.9				0.8				1.4
	1.508				2.678				1.036				2.752													0.7				1.1				0.6				1
	1.252				1.134				0.996				2.006													1.3				0.7				1				2.1
	1.238				1.518				1.104				1.72													1				0.6				0.8				1.8
	1.648				1.495				1.763				4.343													0.6				0.7				1				0.9
	1.093				1.22				1.467				3.048													1.1				0.8				0.6				0.7
	1.773				1.306				1.478				4.063													1.3				0.6				0.6				0.8
	1.322				1.357				1.059				1.471													0.8				0.6				0.6				0.6
	1.245				1.355				1.416				1.658													0.7				0.8				1				1.4
	1.488				1.196				2.258				1.35													0.6				1.2				0.6				0.9
	1.272				1.274				0.732				1.155													0.7				0.6				0.6				0.7
	0.971				1.521				1.059				2.122													0.7				0.6				1.1				0.6
	1.033				1.22				1.279				1.833													1				1.5				0.6				0.9
	1.432				1.314				1.18				1.828													1.3				0.7				1.2				1
	3.202				1.096				1.034				2.015													0.8				0.6				0.6				0.8
	0.926				1.257				0.94				1.385													0.6				1				0.7				1.2
	0.881				1.366				1.203				1.824													0.7				1.3				0.8				1.2
	1.15				1.232				0.628				1.713													0.7				0.6				0.7				0.6
	1.264				1.705				1.322				0.656													0.6				0.6				1.6				0.6
	1.31				2.103				1.485				2.133													0.6				0.9				0.6				0.8
	1.377				1.099				1.259				1.489													0.6				0.8				1.1				0.6
	1.388				1.112				1.135				2.175													2.1				0.8				1				1
	1.087				1.831				0.911				2.381													1.2				0.7				1				1.4
	0.891				0.997				1.318				2.582													0.7				0.6				0.6				1
	1.365				1.241				1.232				2.083													0.9				1.5				1.2				1.2
	1.396				1.207				1.442				2.252													0.6				0.7				0.7				0.6
	1.134				1.216				1.057				2.449													0.8				0.9				0.8				0.6
	1.25				1.395				1.448				2.117													1				0.8				2.1				0.9
	1.257				1.472				1.241				2.466													0.7				0.6				1				0.9
	1.27				1.064				1.348				1.39													0.7				0.6				0.7				1.8
	1.198				1.864				1.362				1.252													1.1				0.6				1.1				0.6
	1.166				1.217				1.272				2.789													0.7				0.8				0.6				0.8
	1.224				1.213				0.742				2.131													0.7				1.2				0.8				1.2
	1.247				0.802				1.615				2.131													0.7				0.6				0.6				0.6
	1.249				1.22				0.906				1.156													0.7				0.6				0.7				0.8
	1.041				1.098				1.206				1.135													0.8				1				0.6				1
	2.189				1.123				2.245				1.958													1				0.7				0.9				0.6
	1.3				1.695				1.314				2.03													1				0.9				0.6				2.1
	1.483				1.457				1.122				2.168													0.6				1.3				0.6				1.4
	1.332				2.223				1.542				1.929													0.8				0.6				1.5				0.9
	1.193				1.854				1.625				1.481													0.8				0.6				0.6				0.6
	0.966				1.608				0.558				1.157													0.7				1.1				0.6				0.6
	1.127				0.88				1.628				1.294													1				0.7				1.2				0.8
	1.264				1.299				1.141				1.262													0.9				0.8				1				0.6
	0.97				1.027				1.175				1.236													0.6				0.7				0.7				1.1
	1.156				1.046				1.339				1.365													0.8				0.6				1				0.8
	0.746				1.366				1.5				1.676													0.6				1.5				0.6				1.8
	1.052				1.341				1.839				1.457													0.7				0.6				0.6				0.7
	0.822				3.594				1.183				0.914													0.6				0.6				0.9				0.7
	0.979				1.44				1.572				1.427													1.1				1.1				0.9				0.8
	0.567				1.186				1.278				1.157													0.8				1.2				1.7				0.6
	2.738				1.614				1.322				1.76													0.7				1.1				0.7				0.8
	1.365				1.539				1.448				1.634													0.6				0.6				0.7				1
	1.427				1.177				1.092				0.656													0.6				0.6				0.9				0.9
	0.977				1.104				2.003				1.176													0.6				0.7				0.6				0.7
	1.303				1.249				2.009				0.975													1.1				0.7				1.1				0.7
	1.479				1.51				1.194				1.822													0.9				0.8				1				1
	1.675				0.681				1.135				2.648													1.4				0.6				1.1				0.7
	1.407				1.095				1.364				1.394													0.6				0.6				0.8				0.6
	1.313				1.939				1.082				0.593													0.7				1				0.9				0.6
	0.851				2.389				1.131				0.956													0.7				1.7				0.9				1
	2.142				1.76				1.075				1.179													1.3				0.6				1.1				0.9
	1.051				1.339				1.798				1.221													0.7				1.3				0.6				0.8
	0.833				1.065				1.247				1.162													1				1.1				0.8				0.6
	1.201				1.614				1.771				2.517													1.1				0.9				1.2				0.6
	0.931				1.287				1.249				1.185													1.1				1.2				1.1				0.6
	1.338				1.275				1.326				2.821													0.9				0.6				0.6				1.3
	1.45				0.767				0.929				2.382													0.7				0.9				0.7				0.8
	1.102				1.101				1.376				2.074													1				0.6				0.6				0.8
	1.367				1.241				1.828				1.869													0.6				0.7				1				1
	1.42				0.885				1.089				1.257													1.3				0.8				0.9				0.7
	1.101				1.576				1.074				2.65													1.2				0.7				1.3				1.8
	1.269				1.594				2.439				2.021													0.6				0.7				0.6				2
	1.351				1.169				2.83				2.562													0.9				0.6				0.6				0.8
	0.804				0.907				1.516				2.009													0.9				0.7				1.2				0.6
	1.106				1.037				1.043				1.901													0.8				0.8				0.8				0.8
	1.154				1.026				1.196				0.962													1.6				1.8				1				0.8
	0.964				1.3				1.649				1.668													0.8				0.9				0.9				1.6
	1.209				1.725				1				1.329													1				0.6				1				0.8
	0.729				1.348				1.233				1.926													0.6				0.9				2.1				0.7
	0.812				1.934				1.875				1.469													0.6				0.7				0.6				0.8
	1.274				1.486				1.141				1.569													1.2				2.6				0.7				0.8
	1.312				1.511				0.694				2.147													0.7				0.6				0.6				1
	2.739				1.334				1.17				2.401													1.1				0.6				1				0.9
	1.24				1.343				1.653				2.013													0.8				0.6				1.7				0.6
	1.409				2.031				1.454				2.036													0.8				1				1.2				1.8
	1.193				1.251				1.705				4.7													0.7				0.8				1.2				1.1
	1.09				1.392				1.279				1.926													1.2				0.6				0.9				0.8
	1.166				1.797				1.268				2.455													0.6				1				0.8				0.8
	1.812				1.585				1.657				2.748													0.6				0.8				0.7				0.7
	0.861				0.949				1.33				1.761													0.8				0.6				1.1				1.3
	1.304				1.615				1.672				1.971													0.9				1.4				0.6				0.8
	0.835				0.93				0.952				2.102													0.7				0.7				0.6				1.1
	1.218				1.458				0.899				0.85													0.6				0.6				0.6				0.6
	1.638				0.946				1.423				0.74													0.7				0.7				0.7				0.6
	0.946				1.041				1.524				1.1													0.6				0.7				0.7				0.9
	1.444				2.152				1.527				2.402													0.6				0.7				0.7				0.6
	0.988				1.395				1.359				1.032													1.1				0.7				0.9				0.6
	1.176				1.191				1.118				2.293													0.6				0.9				0.7				0.8
	1.602				1.315				1.198				3.225													1				0.6				0.6				0.9
	0.85				1.503				1.235				1.396													1				0.7				1.2				3.2
	0.634				1.254				1.403				1.369													0.7				0.9				0.6				1.1
	1.096				1.221				1.591				1.071													1.1				1.2				0.6				0.6
	1.012				1.18				1.479				1.802													0.6				0.6				0.8				0.8
	0.712				0.86				1.299				2.479													1.5				0.6				1.6				0.7
	0.637				1.818				1.403				1.39													0.7				0.8				0.6				0.6
	1.231				1.32				1.007				2.037													0.6				1.2				0.6				0.7
	2.86				1.453				1.664				1.484													0.8				1.8				0.6				0.8
	1.314				1.738				0.96				1.341													0.9				0.6				0.9				1
	0.995				1.792				1.663				0.781													1.2				0.9				1				0.7
	1.101				1.453				0.749				2.779													0.8				0.6				0.7				1.7
	1.881				1.218				1.444				1.937													0.9				0.6				0.6				0.7
	1.698				1.039				0.978				1.344													0.7				0.8				0.6				1.4
	1.326				1.27				1.595				4.071													0.8				0.9				1				1.1
	1.719				1.632				1.06				2.103													1.5				0.6				0.6				1.5
	1.286				1.304				1.282				1.824													1.4				0.7				0.6				1.1
	1.368				1.116				0.851				2.623													0.9				0.8				0.6				2
	1.349				1.586				1.066				2.353													1.4				0.6				0.6				0.6
	1.709				1.243				1.536				2.387													0.8				0.6				0.6				1.6
	1.259				1.308				0.763				2.278													1.1				1				0.7				0.8
	1.73				0.715				1.018				2.631													1.4				0.6				0.9				0.6
	1.149				1.479				1.404				1.383													0.7				0.7				0.6				1.7
	1.057				1.013				0.835				2.733													0.9				0.9				0.6				1.7
	1.174				1.713				1.726				1.377													0.8				0.9				0.9				0.9
	1.365				1.277				0.798				1.635													0.6				0.7				1.1				1.1
	0.952				1.274				1.378				2.18													0.6				0.6				1.9				0.7
	1.138				0.923				1.312				2.746													0.6				0.6				1.7				1.7
	1.176				1.195				1.048				1.453													1.6				1.4				1.1				0.6
	1.308				2.182				1.085				2.16													1				0.6				0.7				0.9
	1.651				1.85				1				1.775													0.8				1.6				0.8				0.6
	2.17				1.53				1.155				0.938													1.6				0.6				1				0.7
	2.277				2.173				1.479				1.943													2.3				0.7				0.6				0.9
	3.57				0.851				1.068				2.301													0.7				0.6				1.1				0.8
	1.415				1.491				1.408				2.608													1.2				0.8				0.6				1.4
	1.261				1.202				0.949				2.247													1.5				0.7				0.8				0.8
	0.88				0.991				1.631				3.105													1.3				0.7				0.9				1.6
	1.571				1.005				0.803				2.487													1.6				0.6				0.9				0.8
	1.414				3.16				1.047				2.785													1				1				0.7				0.7
	1.115				1.359				1.658				2.839													0.7				0.7				0.6				0.9
	1.564				1.004				0.881				2.202													0.7				0.8				0.6				0.7
	1.591				1.534				1.18				2.072													0.6				0.8				1.1				0.6
	1.402				1.332				1.025				1.852													1.4				0.6				0.9				1
	1.502				0.836				1.326				1.269													0.8				0.6				0.6				1.5
	1.946				1.336				1.119				1.181													1.1				0.6				0.9				0.9
	1.827				1.195				1.433				2.158													2.3				0.6				1.3				2
	2.372				1.438				1.221				1.721													0.7				0.7				1.1				0.6
	2.105				1.815				1.323				1.689													0.6				0.9				1				0.7
	1.825				1.416				0.887				1.101													2.6				1.3				0.7				0.8
	1.467				1.391				1.266				1.053													1.5				1.4				0.9				0.6
	1.407				1.293				1.315				1.318													0.7				1.1				0.6				0.9
	0.705				0.844				1.53				1.866													0.6				0.7				0.8				1.8
	1.19				2.098				1.441				1.153													1.8				1.3				1.6				0.8
	1.317				1.393				1.004				1.625													0.6				1				0.8				1.8
	0.768				1.461				1.195				2.028													0.6				1.4				0.6				1.4
	1.331				1.115				1.128				2.233													1				0.6				0.6				0.9
	1.524				1.255				1.6				1.636													0.7				0.7				0.6				1.4
	1.25				1.154				1.223				2.208													0.7				0.6				1.7				0.6
	1.31				1.137				1.277				0.657													0.9				0.9				0.6				0.8
	1.227				1.103				1.64				3.488													0.6				1.1				0.6				1.3
	1.373				1.236				0.928				2.477													0.9				0.6				0.9				0.8
	1.096				1.4				1.242				2.488													2				0.7				1.9				1.9
	1.484				0.728				1.092				2.707													1				0.6				1				1.9
	1.548				1.22				1.407				1.825													1.1				0.6				0.7				0.6
	0.897				1.52				1.149				1.59													0.7				1.3				0.7				1.1
	1.262				1.298				0.729				3.496													1				1.1				0.7				0.8
	1.842				1.418				1.01				2.262													1.3				0.7				0.6				1.5
	2.044				0.769				0.932				0.958													0.6				0.7				0.8				0.7
	1.699				3.022				1.31				2.358													2.1				1.1				1				2.4
	1.129				1.612				1.261				2.609													1				0.9				1.2				1.1
	1.722				1.404				1.086				2.26													0.6				0.9				1.1				1
	1.463				1.407				1.008				2.287													0.7				0.7				0.6				2.2
	1.178				1.054				1.316				1.54													0.7				0.8				0.8				1.2
	1.061				0.844				1.722				2.225													1.5				0.7				0.8				0.8
	1.319				1.747				1.411				3.133													1.4				0.7				0.9				0.8
	0.872				1.31				1.46				2.781													0.7				1.1				1.1				0.6
	1.074				1.618				1.358				2.465													1				0.8				0.7				0.7
	2.04				1.35				1.441				0.839													0.7				0.8				0.6				1
	1.99				1.668				1.409				0.861													0.6				0.8				0.9				0.6
	1.416				1.597				0.953				1.955													1.4				1.1				1.5				0.8
	1.214				1.221				1.293				1.316													1.3				1				0.9				0.6
	1.256				1.083				1.192				1.519													0.6				0.7				0.7				3.6
	1.161				1.451				0.981				0.61													0.8				0.7				0.8				0.6
	1.115				1.546				1.283				1.659													0.6				1.2				0.9				1.2
	0.87				1.428				0.947				2.045													1.1				0.6				0.6				0.7
	1.389				1.546				0.87				2.452													0.9				0.7				0.8				1.1
	1.544				1.47				0.845				1.258													1.3				2				0.6				0.6
	1.592				1.653				1.11				4.157													2				0.7				0.6				1.1
	1.141				1.3				0.786				2.774													1.3				0.6				0.6				0.8
	1.274				1.618				1.164				3.075													1.7				0.8				1				1.3
	1.264				1.783				1				3.278													1.1				1.1				0.7				1.1
	0.934				0.833				1.55				3.204													1				0.8				1				0.8
	1.62				1.47				0.876				2.556													0.8				0.7				0.6				1.5
	3.015				1.282				1.028				2.218													0.7				1.5				0.6				0.7
	1.186				2.269				0.822				2.578													0.6				1.7				0.6				0.6
	1.073				0.752				1.427				2.499													1.1				0.7				0.9				0.9
	1.555				1.561				1.378				1.954													1				0.8				1.8				0.7
	1.149				1.774				1.46				1.292													1.3				1.2				0.7				0.6
	0.81				1.135				1.062				2.115													0.8				0.8				0.6				1.4
	0.846				1.397				1.993				2.269													0.8				0.6				0.7				0.7
	1.122				1.649				0.919				0.762													1.1				0.7				0.7				0.7
	1.448				1.279				1.328				2.855													0.6				0.7				1.2				0.6
	1.71				1.498				1.282				2.084													2.3				1				1				3.7
	0.603				1.554				1.484				3.091													0.7				1.9				0.8				2
	0.99				1.254				0.935				1.884													0.6				1.1				0.7				0.7
	0.96				1.955				1.18				1.845													0.7				0.6				1.1				0.7
	2.899				0.812				0.92				1.502													0.9				0.6				0.6				0.7
	1.806				1.21				2.757				1.924													0.9				0.7				0.6				0.9
	2.084				1.309				1.054				1.47													0.7				0.9				1.2				1.2
	1.142				1.506				0.64				2.096													1.2				0.6				1				0.6
	1.178				1.413				1.237				1.356													1.7				0.6				0.7				0.6
	0.611				1.148				0.918				2.675													0.7				0.6				1.2				1.4
	1.425				1.445				1.205				1.927													0.6				0.7				1.2				2.5
	1.176				0.783				1.915				1.15													0.9				0.6				0.6				0.6
	1.474				1.81				1.407				0.817													0.8				1.5				1.3				0.8
	1.295				2.659				1.385				2.107													1.1				0.6				0.6				0.6
	0.869				1.795				1.245				1.085													1				1.6				1				0.6
	1.361				1.531				1.338				1.422													0.7				0.6				1.5				0.6
	1.487				2.051				1.121				2.735													1.1				0.7				1.3				0.6
	1.022				0.734				1.703				0.928													0.6				0.8				0.6				0.6
	1.612				1.369				1.208				0.886													2.8				0.7				1				0.6
	1.41				0.923				1.46				1.698													1.4				0.8				0.7				0.6
	1.225				0.806				1.475				1.379													0.7				1				0.9				0.6
	1.737				1.172				1.204				1.649													0.7				0.8				1.1				0.8
	1.567				1.538				0.968				2.414													1				1				0.8				0.6
	2.54				1.194				1.127				1.374													1.2				1				0.9				0.7
	1.393				1.306				1.315				2.002													0.6				0.7				2.6				0.6
	1.266				1.448				1.378				1.179													0.8				0.7				1.2				0.7
	1.159				1.641				1.151				1.67													0.7				1.4				1.3				1.3
	1.023				1.305				1.267				1.452													1.1				1.7				0.9				0.8
	1.654				1.291				1.045				2.735													0.6				1				1.2				1
	1.126				1.626				1.344				0.999													0.8				0.8				1.1				0.6
	1.287				1.294				2.632				1.144													1.2				1				0.6				0.8
	1.19				1.473				1.337				1.278													0.7				0.6				1.2				1.4
	1.427				0.957				1.179				2.057													1.5				0.7				1.1				1.4
	1.205				1.75				1.268				1.754													0.7				0.7				1.7				1
	1.106				1.574				1.513				2.015													1.8				0.6				0.7				1.5
	1.137				1.724				1.647				3.148													1				0.8				0.6				0.7
	1.321				1.514				1.142				2.169													1.8				0.6				2.3				0.6
	1.124				1.333				1.317				1.554													1				1.4				1.9				1.1
	2.07				0.733				1.202				0.961													0.7				0.7				1.2				0.6
	1.771				1.425				1.596				0.825													1.4				0.8				0.7				0.6
	1.047				1.109				0.986				1.202													0.6				0.9				0.8				1
	1.019				1.537				1.542				1.423													1.2				1				0.6				0.9
	1.376				1.161				1.674				3.828													0.9				1				0.7				0.6
	1.08				1.436				1.195				2.076													0.6				1				0.8				0.9
	1.458				1.095				1.519				2.29													1.1				0.8				3				0.6
	1.628				1.502				1.156				2.291													0.9				1				1.5				1.2
	1.271				0.906				1.315				1.362													0.6				0.7				1				1.9
	1.092				1.307				1.496				1.121													0.8				1.5				0.6				1.7
	1.377				0.977				1.969				1.785													0.7				0.7				0.6				0.8
	1.495				1.582				1.692				1.715													1.3				0.8				0.8				1.4
	1.003				0.879				1.148				1.401													0.6				0.6				0.8				0.6
	0.975				1.424				1.219				1.34													0.6				2.7				0.9				1
	1.126				0.902				1.428				1.129													0.8				0.7				0.8				1.1
	1.162				1.242				1.311				1.086													1.7				0.7				1.5				0.6
	1.952				1.092				1.361				2.763													1.2				1.7				0.7				2.3
	0.829				0.618				1.468				1.614													1				0.6				0.6				0.6
	0.888				1.516				1.074				3.245													0.7				0.7				1.6				2
	1.076				1.858				1.542				1.579													1.3				1				1.1				0.6
	0.976				1.398				1.456				1.775													1.3				0.8				0.8				1.2
	1.405				1.4				1.65				3.404													1				1				0.6				0.7
	1.157				2.268				1.231				1.163													0.9				1.7				0.7				0.7
	1.078				1.522				1.502				0.978													1.4				0.7				0.7				0.6
	1.292				1.283				1.235				1.042													1.3				0.6				2.5				1
	1.204				0.71				1.217				0.65													2.1				0.8				0.9				0.9
	1.061				0.908				1.25				1.047													1.1				0.9				0.8				1
	3.025				1.104				1.209				2.656													0.7				1				0.6				0.9
	1.691				1.079				0.926				1.666													1.4				2.5				0.8				0.6
	1.298				0.918				1.278				3.159													0.7				1.1				1.6				0.8
	1.056				1.271				1.62				1.124													1.6				1.4				0.7				0.7
	0.794				1.48				1.63				1.638													0.9				1				0.7				0.6
	1.045				0.713				1.473				1.748													0.7				0.9				1				0.6
	1.262				1.07				2.444				2.628													0.6				0.9				0.7				0.6
	1.34				1.29				1.449				2.164													1.5				1.3				1.1				1.1
	0.888				1.435				1.257				2.459													1.5				1				0.7				0.6
	1.042				0.945				1.212				2.345													1.2				0.7				0.7				0.6
	1.317				1.041				1.081				2.346													0.6				0.6				1				1.2
	1.003				2.165				1.423				2.003													0.7				1				1.8				1
	1.296				1.443				1.455				2.526													0.6				1				0.8				1.1
	1.408				1.211				1.502				2.173													2.5				1				0.9				0.7
	1.303				1.429				1.334				1.683													1.7				0.6				0.8				0.6
	1.66				1.033				1.645				2.154													0.6				1.5				1				1.1
	1.345				1.782				0.95				1.578													0.6				3.7				0.6				0.8
	2.238				0.945				1.194				1.464													0.8				0.6				0.6				1
	1.097				1.418				1.663				1.96													0.6				0.8				0.7				0.7
	1.525				0.884				1.174				2.372													1				0.6				0.7				1
	1.257				1.249				1.573				1.667													1				0.7				0.6				0.6
	1.248				1.833				1.167				2.238													0.6				0.7				1.1				0.9
	1.287				1.686				1.417				2.568													1.9				0.8				1.2				0.9
	1.543				1.798				1.087				2.585													0.8				1				0.8				0.7
	1.591				1.508				1.014				1.993													1				0.7				0.8				0.8
	0.903				1.303				0.976				1.548													0.6				1				0.7				0.8
	1.362				0.801				1.524				1.402													0.8				0.6				1.3				0.6
	2.338				1.474				1.219				2.502													1.4				0.9				1.8				1.2
	1.705				1.304				1.629				1.756													2.1				0.8				1.3				0.8
	1.041				0.924				1.159				2.262													0.9				0.7				0.9				0.8
	1.441				1.436				2.817				1.127													0.6				2.1				0.6				0.7
	1.34				0.879				1.346				1.808													1.8				1.1				1				0.8
	1.266				1.322				0.785				2.808													0.6				1				0.6				1.4
	1.339				1.799				1.231				1.03													1.5				0.6				2.5				0.6
	1.877				1.251				0.859				2.734													0.7				1.1				0.7				0.6
	1.054				1.635				1.09				1.746													1.1				0.6				0.7				0.6
	0.963				1.161				3.208				1.266													0.8				0.6				0.9				1
	1.477				0.862				1.08				2.185													0.8				0.8				0.6				1.3
	1.062				3.348				0.795				1.846													1				0.6				0.7				0.6
	1.774				1.327				1.22				0.609													0.8				0.8				0.9				0.6
	1.75				1.77				1.265				2.216													1				0.7				2.2				1
	1.195				1.39				1.65				1.718													0.9				0.9				0.9				0.7
	1.474				1.246				1.705				1.743													0.8				1.9				1				1.1
	1.515				1.296				1.957				0.998													2.7				1.4				0.7				0.7
	2.224				1.168				0.936				1.398													0.6				1.1				0.7				0.6
	1.269				1.441				1.212				2.352													0.7				1.5				0.6				0.7
	0.829				1.083				0.888				0.991													0.9				0.7				1.1				0.9
	1.078				1.572				0.781				1.675													0.7				0.6				0.7				0.9
	1.348				1.194				1.618				2.003													0.6				0.6				0.6				0.6
	1.435				1.384				1.023				1.683													0.7				0.6				0.7				0.7
	0.727				0.694				1.116				2.528													1.1				0.8				0.6				0.7
	0.973				1.373				1.172				1.155													0.7				2.2				0.8				0.6
	0.881				1.128				1.345				1.929													0.9				0.6				1.2				0.9
	0.927				1.54				1.256				2.612													0.7				0.6				1.5				0.9
	1.219				1.185				1.142				1.411													1.1				1.8				1.1				1.3
	1.3				1.268				1.304				1.321													0.6				2.5				0.8				0.6
	1.452				1.353				1.473				0.99													0.9				0.7				1.2				0.7
	1.888				1.069				0.945				1.524													0.6				0.6				0.7				0.6
	1.281				1.335				1.352				2.485													1				0.7				0.6				0.6
	1.805				1.047				1.378				1.263													1.4				0.6				0.7				0.7
	2.349				0.79				0.941				3.136													0.7				0.6				0.6				0.6
	0.944				1.597				1.127				2.816													0.7				1.6				0.7				1.3
	0.83				1.395				1.01				2.914													0.7				1.4				1				0.7
	1.236				1.348				1.057				2.062													0.8				0.8				1.7				0.7
	1.174				1.266				1.39				3.388													0.7				1.3				1.1				1.2
	0.967				1.46				1.639				2.807													0.7				0.8				1.2				2.9
	1.492				1.164				0.991				1.452													1.9				1.1				0.7				0.7
	1.834				3.062				1.142				2.507													1.4				0.6				1.3				1.1
	2.184				1.495				1.359				1.087													1.4				3				1				0.7
	1.069				1.182				1.152				3.41													1				1.2				0.8				0.7
	0.667				3.743				1.568				3.539													0.8				1.1				1				1.6
	1.201				1.197				1.145				2.045													1.7				0.6				0.8				1.2
	1.631				1.288				1.559				2.238													0.6				2.8				0.6				0.8
	1.512				1.06				0.667				2.765													2.4				1.1				0.6				1
	0.878				1.2				1.123				1.922													0.6				1.5				0.7				0.6
	1.638				1.193				1.521				2.288													0.6				0.8				0.6				0.6
	2.128				1.339				1.345				1.772													1.7				1				1.1				2.1
	3.177				1.416				0.978				2.054													0.6				1.8				1.2				0.8
	1.924				1.417				0.956				2.684													0.8				0.8				1.3				2.1
	1.047				1.307				1.488				1.772													0.8				2.5				0.7				0.9
	1.279				1.187				1.7				1.214													1.5				1.2				0.8				0.7
	1.118				1.115				1.286				2.264													1.3				0.6				1.8				1.1
	1.323				1.524				0.97				2.942													1.9				0.7				0.6				0.6
	1.681				1.413				1.477				3.369													1.1				1.5				0.8				1.2
	1.685				1.123				1.528				2.133													0.8				0.8				0.8				0.9
	1.841				0.994				1.485				4.147													0.7				0.8				0.8				1.2
	1.269				1.243				1.186				2.185													0.8				1				0.7				1.1
	1.367				1.379				1.255				2.273													0.7				1.1				0.8				1.1
	1.158				1.405				1.203				1.593													0.7				1				1.3				0.7
	1.738				1.16				1.322				1.676													0.8				0.6				0.8				0.9
	0.763				1.051				0.825				0.799													0.7				0.6				0.9				0.7
	1.142				1.891				1.218				2.436													0.6				1				1.1				0.6
	0.605				1.589				1.466				2.857													0.6				0.7				1.1				0.6
	1.107				1.106				1.603				2.543													1				0.7				0.9				2.5
	1.214				1.174				1.093				1.164													0.6				0.7				0.6				1
	1.127				1.415				0.943				2.73													0.7				0.9				0.6				0.6
	1.467				1.303				1.636				3.133													1.2				0.8				1.4				1.2
	0.918				1.027				1.306				2.905													0.6				0.6				1.9				0.8
	1.537				1.303				1.315				1.977													0.7				1.1				2.1				1.1
	1.254				1.317				1.269				1.038													0.6				1.5				1.4				0.6
	1.454				1.811				1.524				2.117													0.9				0.9				0.9				1.5
	1.011				2.241				1.077				1.785													0.7				0.9				0.7				0.6
	0.878				1.634				1.047				2.328													0.7				1.5				0.6				1.5
	1.379				2.863				1.248				1.604													0.7				0.9				0.6				0.7
	1.581				1.351				1.09				2.743													0.8				1.3				0.8				0.8
	0.985				1.275				1.24				1.831													1.2				0.6				1.1				1.3
	1.079				1.217				1.428				3.09													0.9				0.7				0.6				0.8
	1.387				1.49				1.843				1.68													0.9				1.5				0.8				0.6
	1.447				1.21				2.068				1.487													0.7				0.9				2.2				1.8
	1.449				1.104				1.295				1.911													1.3				0.9				1				0.6
	1.482				1.199				1.17				2.078													0.7				0.8				1.7				2.6
	2.048				0.815				1.213				1.966													0.8				0.6				1.2				1.9
	1.285				1.032				1.089				2.535													0.6				0.9				1.3				0.7
	0.952				1.072				1.424				2.266													0.9				0.8				0.7				0.6
	1.392				1.269				1.226				1.381													1.2				2.4				0.7				0.9
	0.898				1.408				1.323				2.883													0.8				1				1.1				1.2
	1.517				1.499				1.274				1.875													1.2				2				1.2				0.9
	1.402				1.276				1.28				0.96													0.8				0.9				1				0.6
	1.427				1.025				1.402				3.165													1				0.6				1.1				1
	1.131				1.311				1.387				1.982													1.3				1.2				1.2				0.8
	1.724				1.391				1.019				2.203													0.6				0.7				0.7				1.4
	1.196				1.892				1.528				2.41													0.7				1.3				1.4				1
	1.219				1.477				1.264				2.98													0.9				0.7				0.6				1.2
	0.789				1.264				1.288				1.953													1				0.6				2				0.8
	1.293				1.852				1.053				2.144													0.8				0.6				0.7				0.6
	1.76				0.949				1.119				3.235													0.7				0.9				0.6				1.4
	1.113				1.469				1.578				2.094													0.8				0.8				0.6				0.9
	1.385				1.429				0.839				1.476													0.7				0.9				1.2				0.6
	1.302				1.098				1.354				1.271													0.6				1.5				1				0.8
	1.167				0.937				1.289				1.444													1				0.9				0.6				0.6
	1.036				0.819				1.461				1.285													0.6				0.7				0.9				0.6
	1.533				1.223				1.162				2.539													2.3				0.7				1				1.2
	1.35				1.302				1.36				1.726													1.4				1.2				0.8				1.6
	1.376				0.937				1.364				1.038													0.6				1.1				0.9				0.8
	1.372				1.025				0.924				1.73													0.6				1.5				1				0.6
	1.541				3.175				1.095				1.399													1.1				0.8				0.6				1.9
	1.236				1.412				1.313				2.05													0.8				1				0.8				0.7
	1.34				2.28				0.997				3.4													0.8				0.6				0.7				1.6
	0.942				1.034				1.703				3.823													0.6				1.8				0.9				0.9
	1.375				1.573				1.313				1.266													0.9				0.8				0.6				0.6
	1.49				1.514				1.45				2.088													0.6				0.8				1.1				1
	1.547				1.273				1.063				1.203													1				0.8				0.6				0.6
	1.398				1.334				1.265				1.054													0.7				1.7				0.7				0.6
	1.057				1.123				1.223				1.049													0.8				0.7				2				0.7
	1.08				0.839				1.206				1.926													1.1				1				0.7				0.8
	1.049				1.276				1.117				2.381													0.6				1.8				0.7				1.1
	1.173				1.407				1.443				1.77													0.6				0.6				0.6				1.8
	1.449				1.471				1.976				2.095													1.1				0.9				0.6				0.8
	0.891				1.451				1.021				2.445													0.6				0.6				0.8				0.7
	1.119				1.598				1.355				2.645													1.9				0.6				0.6				1
	1.2				1.409				1.201				2.062													1.7				0.6				0.7				1.2
	1.413				1.065				0.802				1.407													0.7				0.7				1				1.2
	0.75				0.894				0.938				2.631													0.6				0.7				2				1.1
	1.128				0.692				1.265				0.864													3				0.8				0.9				0.9
	1.041				1.258				1.43				3.451													0.9				1.2				0.8				0.7
	0.835				1.63				0.784				1.677													1.1				0.7				0.8				1
	1.019				1.137				1.337				2.174													0.7				1				0.7				0.8
	1.152				1.227				0.876				1.055													1				0.8				0.7				0.6
	1.182				1.263				1.023				0.727													0.7				1.3				1.4				0.8
	2.339				2.201				0.957				2.32													0.6				0.7				0.8				0.6
	1.238				1.147				1.355				2.064													0.6				0.6				0.8				1.7
	1.239				1.306				0.885				2.352													0.7				1.4				0.8				0.7
	1.072				1.848				0.872				1.71													0.9				0.8				0.6				0.6
	1.23				1.282				1.452				1.807													0.7				1.2				0.7				1.7
	1.886				0.943				1.383				1.808													0.6				0.8				0.9				0.7
	2.326				1.074				0.752				1.826													0.8				1.4				0.6				0.6
	1.378				1.237				1.155				1.376													1.1				0.7				0.6				0.9
	1.056				1.116				1.018				1.991													0.9				1				0.6				0.8
	1.263				1.156				0.826				1.566													0.8				0.9				0.6				0.6
	1.158				1.396				1.23				1.675													0.6				0.7				0.8				1
	2.047				1.144				0.882				2.045													0.9				0.6				0.6				0.9
	2.056				1.307				1.422				0.662													1.3				1.4				0.9				0.6
	2.125				1.303				1.573				1.517													0.7				1.5				1.4				0.9
	1.295				1.306				0.897				0.872													0.6				0.7				0.6				1.1
	1.727				1.394				2.289				1.724													0.8				2.4				1				0.6
	1.056				1.45				1.492				1.841													0.7				0.8				0.8				1.3
	1.515				1.769				1.576				3.52													1.6				0.8				0.6				1.9
	1.194				1.556				1.953				2.036													1.1				1.3				0.7				0.6
	1.411				1				1.113				1.832													1.5				1.3				0.6				0.7
	1.067				1.117				1.242				1.96													0.8				0.9				0.6				0.6
	1.008				0.907				1.287				1.732													1				1				1				1
	1.118				1.236				1.206				2.146													0.9				1				0.6				0.6
	0.935				1.035				1.664				1.942													1.1				0.6				0.6				0.7
	1.147				1.223				1.417				1.763													0.7				1				1.1				2
	1.148				1.004				1.005				1.863													1				1.5				0.6				1.1
	1.388				1.379				1.451				2.633													0.6				0.6				0.6				0.9
	1.77				3.332				1.239				2.462													1				0.7				0.7				1.9
	0.951				3.393				0.834				2.009													0.7				1.8				0.6				3.5
	1.637				1.54				1.212				1.407													1.4				1.4				0.8				0.8
	1.791				1.181				1.092				1.708													1				0.8				1.2				1.2
	1.294				1.53				0.798				2.2													0.8				0.7				1				1.6
	0.939				1.347				0.915				1.732													0.7				1.6				0.6				0.6
	1.359				2.794				1.435				2.446													0.7				0.8				0.6				1.6
	0.758				0.979				1.286				2.847													0.6				0.7				1				1.1
	1.016				1.521				0.705				2.371													0.6				0.7				0.6				1
	1.176				1.374				1.093				2.737													1				0.7				0.6				0.6
	0.92				1.043				0.873				2.201													0.6				1.6				0.6				1
	1.469				1.855				1.135				2.239													0.8				0.7				1.6				0.7
	0.996				0.989				0.991				2.269													0.6				1				1.6				0.9
	1.772				0.787				1.375				1.154													0.7				0.6				0.8				0.7
	1.455				0.915				1.125				2.076													0.6				0.8				1.1				0.7
	1.329				1.468				0.986				1.216													0.7				0.8				1				0.6
	1.363				1.325				2.607				2.039													1.1				0.6				0.6				0.6
	0.972				1.275				1.291				2.385													0.6				0.7				0.6				4.6
	1.045				1.102				1.601				2.937													0.6				0.7				0.9				0.9
	1.274				1.511				0.86				2.003													0.6				0.9				0.8				0.7
	2.5				1.086				0.975				2.063													0.8				1				1.3				1.8
	1.435				1.514				0.932				1.888													0.6				0.9				1				0.6
	1.069				1.206				1.344				0.956													1.4				1.1				0.6				1.1
	1.215				1.206				1.528				2.259													1				1				0.6				1.3
	1.359				1.533				0.645				3.214													1.1				0.6				0.7				0.6
	0.983				1.204				1.124				2.031													1.8				0.6				0.7				0.7
	0.803				1.567				1.708				1.391													0.8				0.8				1				0.8
	1.221				1.14				1.062				1.121													1.3				0.8				0.6				0.7
	0.925				1.041				0.72				1.323													0.9				0.7				0.6				0.7
	1.048				1.097				0.761				1.932													0.7				0.6				0.6				0.6
	0.851				1.164				1.341				1.651													0.6				0.7				0.7				0.8
	1.476				1.186				1.259				1.879													1.2				0.9				1.4				1.1
	2.495				0.661				2.941				1.236													0.8				0.6				1.3				0.6
	2.184				1.424				1.101				1.133													0.7				0.9				0.8				0.8
	1.83				1.025				0.798				1.967													0.8				0.7				1				1.1
	1.3				1.025				1.17				2.994													1.5				0.6				0.8				1
	1.26				0.703				0.977				2.613													0.6				0.6				0.8				1
	1.24				1.234				1.647				1.565													0.7				1.4				0.6				1.3
	0.745				1.461				1.275				1.385													0.6				0.8				2.3				0.6
	1.712				1.316				1.632				1.779													0.6				0.6				1.2				0.7
	1.46				1.191				1.357				2.505													0.6				1.3				0.8				1.4
	1.247				1.265				0.83				2.389													0.7				1.2				0.7				1.3
	1.248				1.659				1.324				3.49													0.6				0.7				0.7				1.3
	2.072				1.342				1.118				2.159													1.1				3.2				0.6				0.6
	1.536				1.379				1.02				2.423													1.3				1				0.9				1.2
	1.46				1.479				1.08				1.886													1.2				0.6				1.2				0.6
	1.186				1.64				1.039				2.772													0.6				0.7				0.8				1.1
	1.363				1.173				1.177				2.559													0.6				5.9				0.8				1.9
	1.483				0.762				1.288				1.796													1				0.6				2.1				1.3
	0.932				2.015				1.054				1.045													0.8				0.7				0.8				1
	1.598				1.411				1.253				2.441													0.7				0.6				0.6				1.2
	1.591				1.039				1.315				1.662													0.7				0.8				0.6				0.6
	1.53				1.033				1.045				1.347													0.7				0.6				0.9				0.9
	1.097				1.188				0.774				1.644													1.4				1.7				0.7				0.6
	1.523				1.127				1.158				2.042													1.2				0.8				0.9				1.2
	1.155				0.957				1.264				2.085													1.5				0.8				0.7				1.7
	2.072				1.41				1.677				1.153													1.2				0.6				0.7				1.1
	1.126				1.455				0.927				1.934													0.9				1.8				0.6				1.5
	1.436				0.842				1.904				1.94													0.7				1.2				1.2				0.9
	1.168				1.063				0.827				1.994													0.6				1.3				0.7				1.8
	1.058				1.176				0.788				2.518													0.6				0.9				0.6				2.8
	1.359				1.018				0.842				1.748													0.7				0.6				0.6				0.8
	1.346				1.356				1.174				1.549													0.7				1.1				1.1				1.1
	0.803				1.218				1.569				1.63													0.6				0.8				1.2				1.5
	0.909				2.098				1.133				1.282													0.9				0.9				0.6				0.7
	1.18				1.605				1.065				1.693													0.7				1.1				1.2				0.6
	0.798				3.918				0.891				3.001													0.6				0.9				0.8				0.6
	1.551				1.135				1.232				1.706													2				0.8				1.9				0.7
	1.304				1.219				1.227				1.814													0.6				0.7				0.8				0.6
	1.739				0.786				1.142				2.574													2.7				0.6				0.9				1.4
	0.857				1.371				0.803				1.7													0.6				0.7				0.6				1.1
	1.233				1.122				1.347				3.535													0.7				0.9				1.3				0.8
	1.21				1.503				1.109				2.576													0.6				1.5				0.6				0.8
	1.407				1.129				1.095				1.711													1				0.7				1.4				0.7
	1.484				1.185				1.002				2.698													0.7				0.9				1.6				1.7
	0.979				1.208				2.022				2.369													0.6				1.9				0.7				0.6
	1.257				1.188				1.036				2.464													1.7				0.6				0.6				1.4
	1.245				1.082				1.319				2.255													0.6				0.6				1.5				0.9
	0.808				1.44				3.067				1.062													0.6				0.7				0.9				0.9
	0.952				1.397				3.147				1.904													0.9				1				0.8				0.7
	1.514				1.215				3.233				2.217													0.6				0.6				1.4				1
	1.048				1.531				0.973				2.526													0.7				0.7				0.6				2.2
	1.367				1.114				1.629				2.388													1.1				0.7				0.7				0.6
	1.459				1.717				1.268				1.608													0.7				0.6				0.9				1.1
	1.364				1.487				1.574				2.701													0.6				0.8				0.7				0.6
	1.233				1.661				1.372				0.983													0.8				0.6				0.6				0.6
	3.001				1.234				0.697				0.9													1.5				0.8				0.7				0.6
	3.024				0.923				1.638				1.363													1.1				0.6				0.9				0.6
	1.355				1.528				1.344				2.657													1				1.4				0.8				0.9
	1.176				1.486				1.601				1.375													0.8				1				0.7				0.6
	0.726				1.31				1.008				1.526													0.6				0.9				0.6				1.2
	1.663				1.278				2.665				2.178													1.2				1.3				0.7				0.8
	1.42				1.363				1.095				1.877													2.1				1.7				0.7				1
	2.155				1.167				1.139				1.689													1.1				1.1				1.6				0.8
	1.17				1.285				1.125				2.437													0.7				0.7				0.6				1
	2.192				0.93				1.052				2.285													0.7				0.8				0.7				1.9
	1.689				0.875				1.438				2.218													1.7				0.8				0.7				0.9
	1.689				1.224				0.822				1.844													0.6				1.1				0.9				0.6
	1.441				1.004				0.981				1.626													0.7				0.7				0.8				0.6
	1.075				1.589				1.388				0.733													0.6				2.4				1.4				0.9
	1.312				1.515				1.041				1.404													1.1				1.7				0.8				0.8
	0.913				1.249				1.218				1.131													0.6				1				1.1				0.6
	1.278				0.912				1.123				2.673													0.8				0.7				1				1.2
	1.522				1.265				1.175				1.314													0.8				1.1				0.7				0.7
	1.326				1.454				0.934				0.973													0.9				0.8				1				0.6
	0.799				1.226				1.416				3.059													0.6				0.7				0.6				1.2
	1.653				1.428				0.826				2.762													0.9				0.6				0.7				0.6
	1.415				1.357				1.324				2.622													0.6				0.9				0.6				1.3
	2.179				1.621				1.378				2.259													0.6				0.6				1				0.7
	1.297				3.69				1.293				1.857													1.3				1.7				0.6				0.6
	1.1				1.84				1.403				0.984													0.8				1				1.3				0.7
	1.012				1.183				1.25				1.967													0.8				0.6				0.6				1.2
	1.758				1.213				1.43				1.436													1.4				1.4				0.7				0.7
	3.462				1.383				1.213				0.844													1				0.6				0.6				0.7
	1.786				1.184				1.341				1.891													0.9				1.5				1.2				0.6
	1.678				1.347				1.258				1.133													0.8				1.5				0.9				0.6
	1.417				1.248				0.823				2.286													1				0.6				0.6				2.4
	1.131				1.17				1.167				1.339													0.8				1.4				0.9				0.8
	1.311				1.411				0.998				1.848													0.9				1.9				0.6				0.9
	1.37				1.361				1.455				2.098													0.8				0.9				1.1				1.3
	1.497				1.226				1.203				1.34													0.6				1.2				1				0.8
	1.228				1.05				1.177				2.348													0.6				2				0.6				1.5
	2.163				0.921				1.598				2.314													1.3				0.7				0.6				0.6
	2.411				1.361				0.923				1.585													0.6				2				0.7				0.7
	1.322				1.351				1.453				2.591													0.8				0.9				1.4				1.2
	1.194				2.132				1.651				2.048													1.1				1.1				0.6				0.8
	1.94				1.02				1.111				2.144													0.8				0.6				1.2				1
	0.965				3.219				1.167				1.633													0.8				1				0.6				0.7
	1.492				1.465				0.977				1.781													0.7				1.2				0.8				1.6
	1.89				1.35				1.261				1.764													0.8				1.3				0.9				1.2
	1.531				1.208				1.259				2.511													1.3				1.4				0.6				0.6
	1.776				1.159				0.96				3.388													0.8				0.8				0.7				0.7
	1.577				1.124				0.693				2.181													0.6				0.6				0.7				3.4
	0.973				1.161				1.286				2.103													0.8				2.2				0.8				1.5
	0.959				1.536				1.399				1.709													0.8				0.6				0.8				1
	1.183				1.36				0.844				0.94													1.3				1.1				0.9				0.7
	1.976				1.352				1.131				2.04													0.9				1.5				0.6				0.6
	1.296				1.11				1.272				1.652													1.4				0.7				0.6				1.1
	1.08				1.075				1.253				0.649													0.9				0.7				0.9				0.6
	0.846				1.044				1.044				1.519													0.6				1				0.7				0.8
	1.208				1.002				1.779				0.745													1.4				0.6				0.6				0.6
	0.678				1.781				1.714				1.381													0.7				1				1				1.1
	0.972				1.315				1.237				1.343													0.7				0.9				0.8				0.7
	1.246				2.005				1.19				3.167													0.7				0.9				2				0.6
	0.93				1.282				1.165				1.383													0.6				1.3				0.6				0.6
	1.856				1.351				1.029				1.709													0.6				1.9				0.6				0.7
	1.393				1.233				1.493				2.166													1.3				0.8				0.6				1.1
	1.045				1.312				1.084				2.403													0.6				0.9				1.1				0.6
	1.232				1.106				1.492				0.953													0.6				1.2				0.6				0.6
	0.844				1.299				1.19				4.043													0.6				0.6				1.5				0.6
	1.296				2.261				1.065				2.422													0.9				0.9				1				0.9
	1.504				1.7				1.115				1.703													0.6				0.8				0.6				0.7
	2.238				1.666				0.819				1.899													0.6				0.8				0.6				0.6
	1.861				1.23				1.332				1.838													0.7				0.6				0.6				0.9
	2.058				1.611				0.801				1.362													0.7				0.8				0.7				0.7
	0.977				1.585				1.424				0.833													0.9				0.8				1.2				0.6
	0.802				0.996				1.004				1.389													1				0.6				0.7				1.4
	0.614				1.413				1.617				1.96													0.7				1.2				0.9				0.8
	0.987				1.278				0.87				3.01													0.6				2				0.6				1
	1.237				2.019				1.143				2.781													0.6				0.7				0.6				0.9
	0.995				1.251				1.914				2.187													0.6				0.8				0.7				0.9
	1.564				1.359				1.244				1.576													1.2				0.7				0.8				2
	1.063				1.172				0.599				1.375													0.9				0.9				0.7				0.8
	0.806				2.574				1.092				1.807													0.7				1.2				0.6				0.8
	1.022				0.83				1.214				1.427													0.6				0.7				0.7				0.6
	1.187				1.116				1.331				2.5													0.6				0.9				0.7				1.1
	1.147				1.086				1.134				3.346													1.2				1.4				2.1				0.9
	1.038				1.186				1.182				2.721													0.7				0.8				0.6				0.9
	1.047				1.344				1.679				1.691													1.2				1				1.2				1.1
	1.712				1.004				0.815				1.222													0.6				1.6				0.9				0.7
	0.832				1.302				1.501				3.607													1				2.2				0.7				0.6
	1.046				0.672				1.027				1.54													0.6				0.6				1.1				0.7
	2.038				0.967				1.268				2.682													0.8				0.6				0.8				0.6
	0.863				1.295				1.68				4.223													1.1				0.6				1				0.6
	1.178				1.254				1.742				3.202													1.3				0.9				0.6				1.1
	1.203				1.448				1.906				1.897													0.7				1.6				0.7				0.6
	1.187				1.273				1.063				2.306													0.6				1.1				0.9				0.8
	1.197				1.368				0.894				1.558													0.6				2.5				0.8				0.7
	1.285				1.465				0.974				1.578													0.8				0.9				0.7				0.6
	1.427				1.651				1.242				1.339													1.1				0.6				0.9				0.6
	1.276				1.501				1.07				1.241													1.8				0.7				0.7				0.6
	1.182				1.153				1.485				0.897													0.8				1.1				0.8				0.6
	1.718				1.401				0.656				1.224													0.7				1.2				0.6				0.6
	1.781				1.255				1.08				1.018													1.4				0.9				1				0.6
	0.963				1.734				1.446				1.511													0.7				0.7				1.8				0.6
	2.037				1.576				1.351				0.899													0.6				1.6				0.6				1
	0.98				0.848				1.23				1.265													0.7				0.6				1.8				1.2
	2.233				0.669				1.195				1.756													1.8				0.7				0.7				1.1
	1.909				1.444				0.995				2.097													1.1				0.8				1.2				0.7
	0.623				1.083				0.753				2.529													1				1.7				0.8				1.3
	1.27				1.13				1.261				1.845													0.6				1.5				0.8				1.2
	1.124				1.199				1.209				1.793													1.3				1.5				1.1				0.6
	1.612				1.164				1.297				2.56													0.6				2.1				0.7				1.3
	0.901				1.15				1.288				3.185													0.7				0.9				0.8				0.6
	1.27				1.237				1.494				2.433													0.9				3.3				0.6				0.7
	1.655				0.976				1.184				2.589													1.1				0.8				0.6				0.6
	1.27				1.349				1.278				2.016													3				0.6				1.1				0.6
	0.626				1.664				0.959				1.797													0.7				1.3				1				0.7
	1.2				1.05				1.154				2.179													1.1				1				0.7				1.2
	0.686				1.637				0.988				1.334													0.6				0.9				0.6				0.6
	0.739				1.3				0.815				1.865													0.7				0.6				0.8				1.8
	1.783				1.198				1.07				2.154													0.8				2.1				0.8				1.1
	0.859				1.709				1.485				1.575													1.2				0.7				1.1				1.1
	0.999				1.322				1.05				1.567													0.7				1.5				1				0.7
	0.639				1.205				1.173				1.653													0.8				1.5				1.1				1.3
	0.818				0.749				1.062				0.731													0.8				0.7				0.6				0.6
	1.237				1.57				2.013				1.505													0.9				0.6				0.6				0.7
	1.211				1.311				1.217				1.996													1.7				0.7				1.2				0.8
	1.326				2.439				1.01				1.355													0.6				0.7				1.2				0.8
	1.048				1.884				1.691				2.637													0.8				0.6				0.6				0.6
	0.927				1.189				0.918				0.958													1.5				2.3				0.7				1
	0.904				1.083				0.959				1.87													0.9				1				1.3				1.7
	1.013				1.144				0.798				3.056													0.9				0.8				0.6				0.6
	1.852				1.243				1.357				1.646													1.1				0.6				1				0.6
	1.869				1.27				0.995				2.172													1.1				1.4				0.6				1.3
	1.599				3.168				1.026				3.097													0.9				0.6				1				0.6
	1.368				2.924				0.692				2.836													0.6				0.6				0.6				0.6
	1.156				1.048				1.394				2.519													1.5				0.9				0.9				2
	0.872				1.023				0.928				0.948													0.6				0.7				1.7				0.7
	1.453				1.174				0.856				0.689													0.8				1.5				0.8				0.6
	0.767				1.034				1.115				3.049													0.6				0.6				0.7				0.7
	1.335				0.995				1.124				1.734													2.4				0.6				0.9				0.7
	1.19				1.307				1.103				1.214													1.7				0.6				1.6				0.7
	1.36				1.567				1.44				1.402													0.6				0.7				0.7				0.7
	1.712				1.146				1.033				1.287													1				0.7				1.1				0.6
	1.607				1.329				0.944				1.468													2.1				0.8				0.6				1.1
	0.769				1.269				1.454				2.197													0.7				1.5				0.7				1.8
	2.128				0.967				0.877				1.446													0.9				0.9				0.6				0.6
	1.368				1.507				1.391				1.795													2.1				1				1.7				0.9
	1.132				1.288				0.707				1.828													1.1				0.7				0.6				1.8
	1.286				1.228				1.898				0.799													0.6				0.6				0.7				0.7
	1.294				1.403				1.463				2.356													1.5				1				0.9				0.8
	1.066				1.314				0.777				2.236													0.6				0.8				0.7				1.1
	1.786				1.563				1.248				1.248													0.7				1				1.4				0.9
	1.464				1.297				1.308				2.158													0.6				1.5				0.7				0.7
	1.496				1.42				0.857				2.082													0.6				0.6				0.6				0.7
	0.839				1.708				1.236				1.587													0.6				0.6				0.6				0.8
	2.873				1.131				1.412				0.743													0.7				1.1				0.6				0.6
	1.281				1.374				1.087				1.832													0.7				0.7				0.9				1
	1.625				1.025				1.475				1.619													1				0.6				1				0.6
	1.363				1.583				1.289				1.661													1				1				0.6				0.7
	1.431				1.222				1.199				1.235													1.8				0.6				1.2				0.9
	1.831				1.896				0.994				1.737													0.6				1.3				0.7				0.8
	1.368				1.063				1.371				0.77													1.1				0.7				1.2				0.6
	0.963				1.284				1.015				2.525													0.7				1.5				1.2				0.9
	2.376				1.376				2.059				0.851													1.1				0.8				0.6				0.8
	1.175				2.385				1.257				2.133													1				0.7				1				0.8
	1.208				1.799				0.49				2.648													1.4				0.6				0.6				1.4
	1.089				2.109				1.367				1.658													1.1				0.7				1.8				0.7
	1.877				1.697				0.753				2.38													0.6				0.9				0.6				0.9
	1.516				1.332				1.485				2.05													0.6				0.6				0.7				1.1
	2.128				1.04				0.91				2.168													0.8				0.6				0.7				0.7
	0.931				1.199				1.295				1.63													1.2				0.7				0.9				0.6
	3.138				1.061				1.349				1.113													0.9				0.6				0.6				0.9
	1.142				0.892				1.474				1.347													2.6				0.7				0.8				0.6
	1.019				1.476				0.686				2.418													0.8				0.6				1.5				0.7
	1.275				1.299				1.098				1.91													0.9				0.7				1				1.2
	1.949				1.356				0.876				2.687													0.6				0.8				0.6				2.4
	1.174				1.548				1.017				0.927													1.1				0.6				0.8				0.7
	1.134				1.441				0.985				1.078													0.8				0.7				1.7				0.8
	0.873				1.376				1.278				2.285													1				0.7				0.6				1
	0.761				0.928				0.826				1.42													0.7				1.8				0.9				0.7
	1.188				1.607				0.716				1.615													1				0.9				0.6				1.9
	0.998				1.194				1.628				1.853													1				0.8				0.7				0.8
	1.38				1.837				1.656				1.258													2				0.6				1.6				0.6
	1.005				1.576				1.74				1.496													0.8				0.6				1.2				1.1
	0.951				1.563				1.484				0.856													0.7				0.8				0.6				0.6
	1.229				1.334				1.082				1.82													1.6				1				1				0.7
	0.98				1.523				1.229				1.954													0.6				1.4				0.9				1.2
	1.418				1.69				0.846				1.679													1.7				1				0.7				0.7
	1.72				0.973				1.297				1.111													0.8				0.6				0.6				0.6
	1.427				1.115				1.662				1.611													0.8				0.6				0.7				1.4
	0.912				0.99				1.165				1.324													0.8				0.6				1.1				0.6
	1.548				1.024				0.957				2.279													0.9				0.9				0.8				1.3
	1.145				1.315				2.808				0.856													1.1				1				0.8				0.8
	1.36				1.212				1.134				1.681													0.6				0.7				0.8				0.6
	1.27				1.03				1.125				0.792													0.9				0.6				0.7				0.6
	2.017				1.139				1.236				2.55													0.6				0.6				0.6				0.7
	1.394				1.354				1.733				2.084													0.8				1.3				0.7				2.4
	1.042				1.492				0.85				2.375													1				1.2				0.9				0.6
	0.971				1.038				2.854				2.937													0.6				0.7				1.6				1.2
	0.534				1.872				2.8				1.766													0.7				0.8				1				0.6
	1.151				1.679				1.868				2.734													1.2				0.6				2				1
	1.143				1.258				1.263				1.264													0.6				1.2				1.1				1
	1.038				1.471				1.526				1.843													1.1				0.6				0.7				1.4
	1.493				1.166				1.104				2.265													0.6				1.5				0.6				1.7
	0.725				3.785				1.305				2.692													0.7				3.4				0.8				0.6
	1.373				1.42				1.429				2.825													1.2				2				1.9				3.6
	1.44				1.352				1.38				3.599													0.6				1.2				0.6				1.2
	0.941				1.19				1.23				1.744													0.7				1.2				0.6				2.3
	0.983				1.47				1.208				1.074													0.7				0.6				0.8				0.6
	1.142				2.592				0.843				1.386													0.8				0.7				0.6				0.9
	1.309				1.548				0.737				1.562													0.7				0.7				0.6				1.1
	1.806				1.471				1.25				1.062													0.6				0.7				1				0.8
	0.895				1.212				1.325				1.249													0.7				1				0.7				1.2
	1.149				0.821				0.943				0.924													0.8				0.7				0.8				0.6
	0.935				1.21				1.613				1.173													0.9				1.1				0.6				0.9
	0.885				1.633				0.516				1.219													0.6				0.9				0.6				1.7
	1.321				1.728				1.567				1.053													1.5				0.9				1.2				0.7
	1.07				0.725				1.326				2.221													0.6				0.6				0.6				1.5
	0.789				2.806				1.17				1.088													0.9				0.8				1.2				1.1
	1.177				2.933				1.377				1.979													0.6				2				0.7				2.4
	1.369				2.19				1.075				1.421													1.1				1				0.7				1.9
	1.012				1.544				1.239				2.542													0.6				1.3				0.7				1.1
	0.897				1.244				1.184				1.946													0.7				0.6				0.7				0.8
	1.085				1.108				0.691				2.244													0.7				0.7				0.6				0.9
	1.005				1.053				0.843				1.481													0.6				1.3				0.6				0.7
	1.329				1.041				0.487				1.45													0.8				0.8				0.7				0.6
	0.548				1.538				1.379				1.815													0.7				0.6				0.8				1
	0.879				1.529				1.659				1.112													0.6				2.3				0.8				0.8
	1.499				1.674				1.528				1.598													1.1				0.8				0.6				0.7
	1.224				1.068				1.441				1.335													0.9				0.7				1.1				0.8
	1.083				0.712				0.988				1.667													0.6				0.6				1.1				0.8
	1.167				1.442				1.329				0.764													0.9				0.6				0.7				0.6
	1.147				1.485				1.244				1.515													0.6				1.1				0.8				0.8
	0.765				1.664				1.021				1.563													0.6				1				0.7				1.2
	1.072				0.969				1.463				1.972													1.3				0.7				0.6				0.6
	0.996				1.271				1.058				1.15													0.7				0.8				0.7				1.2
	1.364				1.426				1.017				0.791													0.7				2.6				0.8				1.1
	1.371				1.376				1.392				1.71													0.6				1				1.3				0.8
	2.35				1.561				1.547				2.549													0.7				1				0.7				1
	1.102				1.906				1.236				1.411													0.9				0.6				0.8				0.9
	1.258				1.479				1.572				1.353													0.6				0.6				0.9				0.6
	0.998				1.406				1.277				1.678													0.8				0.8				1.1				0.9
	0.965				2.648				0.978				2.873													0.7				0.7				1.2				0.9
	1.517				1.864				1.196				2.378													2.8				0.6				1				1.6
	2.207				0.857				1.364				1.276													1.5				0.7				0.9				0.7
	2.555				1.168				1.573				1.727													1.8				1.4				0.7				1.1
	0.735				1.093				1.196				2.208													0.6				0.7				0.6				0.8
	1.354				1.49				1.404				2.144													0.8				0.7				0.6				1.6
	1.609				0.67				0.637				1.375													1.5				1.2				0.6				0.6
	1.561				1.455				1.185				1.135													0.7				0.6				1.4				0.6
	1.244				1.208				1.016				1.072													0.6				0.7				0.6				0.7
	1.535				1.248				1.213				2.307													1.2				0.8				1				1.1
	0.983				1.042				1.165				0.959													0.7				0.6				0.8				0.7
	1.306				1.637				1.444				1.202													0.7				0.6				0.6				1
	1.18				1.359				1.071				1.639													0.9				0.6				0.8				0.6
	1.249				2.426				1.112				2.586													0.7				2.9				0.7				1.7
	1.18				1.093				1.146				1.851													2.4				1				0.8				2.1
	0.929				1.454				1.101				2.207													0.7				1.8				1.3				2.8
	1.07				1.246				1.476				2.274													0.6				0.7				0.8				1.8
	1.481				0.877				0.934				2.496													1.1				0.6				0.9				0.9
	1.526				0.906				1.266				0.956													1				0.6				0.7				0.6
	1.587				2.031				0.916				2.371													2.2				0.6				0.6				1.1
	1.351				1.47				0.675				2.055													1.1				0.6				0.8				1.2
	0.852				1.464				1.125				2.513													1.3				0.8				0.6				1.8
	1.77				0.996				0.836				1.444													0.6				0.6				0.8				0.6
	1.258				1.524				0.952				1.389													0.9				0.8				0.7				0.7
	0.984				1.249				1.544				1.794													0.6				0.9				0.6				0.8
	0.768				0.984				0.888				1.263													0.9				0.7				0.8				0.9
	1.436				1.496				1.283				2.089													0.9				0.7				0.7				0.6
	1.462				0.795				1.049				1.179													0.8				0.6				1.1				0.7
	1.48				1.532				1.049				1.314													0.8				0.7				0.6				0.6
	1.245				1.481				1.235				1.367													1.1				2				1				0.6
	1.503				1.558				0.886				3.598													0.9				1.2				0.7				0.7
	1.318				1.402				1.875				2.552													0.7				0.8				0.6				1
	1.497				1.165				1.074				1.773													2				1.3				1.1				0.6
	1.782				1.534				1.233				1.345													2.4				0.7				1				0.7
	1.397				1.348				0.829				2.322													1				1.3				0.6				0.7
	1.984				1.165				0.692				1.92													1.5				1.3				0.6				0.6
	1.646				1.324				1.262				2.584													0.6				1.7				2.2				1
	1.217				0.996				1.048				2.221													0.6				1.6				2.5				0.6
	1.789				1.594				1.371				0.882													1				0.6				1.7				0.7
	1.837				1.574				1.547				1.908													0.6				1.3				0.8				1
	0.911				2.16				0.752				2.393													0.8				0.6				0.6				2.4
	1.129				1.375				1.705				2.083													1.1				0.6				0.9				0.6
	1.088				0.926				2.036				2.014													0.6				0.8				0.6				1
	1.281				1.473				1.049				1.193													1.1				0.7				0.6				0.7
	0.995				0.996				1.461				1.659													0.7				3.1				0.6				2.5
	1.749				0.726				1.25				2.754													1.3				1.1				0.6				1.2
	1.016				1.352				0.901				1.412													0.6				0.8				0.8				0.6
	1.583				1.795				0.953				2.129													1.1				0.6				0.6				2.1
	1.63				1.146				1.042				1.605													0.8				0.7				0.7				1.3
	1.494				1.245				0.917				1.319													0.7				0.6				0.6				1.3
	1.234				1.804				1.211				1.93													0.7				0.7				0.8				1
	1.311				1.926				1.137				1.836													1.1				0.6				0.8				1.2
	1.674				1.377				1.549				2.527													1				0.6				0.6				0.9
	1.784				1.459				1.022				1.144													0.6				1.6				0.6				0.9
	1.15				1.15				1.13				1.848													0.7				1.5				0.7				0.9
	2.093				1.104				0.908				2.927													0.8				0.9				0.7				0.9
	1.294				1.283				1.198				3.144													0.6				1.5				0.9				0.9
	1.22				1.341				1.576				2.265													0.8				0.7				0.6				1.1
	1.585				1.416				1.222				1.539													1.7				0.7				0.6				0.6
	1.355				1.274				1.674				0.985													1.7				0.6				0.6				1.1
	1.022				1.422				1.414				1.582													0.7				0.8				0.6				1
	0.952				1.476				1.325				2.245													0.7				1.4				0.9				2.1
	0.888				1.101				1.008				1.815													0.7				0.8				0.8				1
	1.6				0.994				0.801				1.147													1.2				0.9				0.7				1.1
	1.431				1.094				0.91				2.195													0.8				1.2				1				0.7
	1.231				0.864				1.513				1.992													0.6				0.8				0.9				1.1
	1.078				1.034				1.579				1.998													0.6				0.6				0.8				1.7
	1.445				0.937				0.854				2.304													0.7				1				0.7				1.4
	1.412				1.159				1.729				2.176													0.7				0.8				1.3				0.7
	1.302				1.454				1.488				1.568													0.9				0.9				0.7				0.8
	1.438				1.512				0.671				1.448													0.6				0.7				0.6				0.6
	1.234				1.028				1.115				1.275													0.6				0.7				0.8				0.7
	1.179				1.789				1.411				1.117													0.6				0.7				0.6				0.6
	2.021				1.652				0.85				2.261													1.2				1.2				0.6				1.2
	1.721				0.715				0.827				0.979													0.8				0.6				0.6				0.6
	1.027				1.505				1.13				1.952													0.6				1.1				0.7				0.9
	1.35				1.383				0.945				1.025													0.9				0.7				1				1.2
	1.203				1.788				0.917				1.664													0.6				0.6				1.2				0.7
	0.666				1.669				0.839				0.948													0.7				0.6				0.6				0.7
	1.312				1.702				1.471				0.932													1.3				0.8				0.6				0.7
	1.198				0.822				1.303				2.339													1				0.7				0.7				1
	1.772				1.117				1.023				1.177													0.7				0.7				1.3				1.8
	1.293				1.328				1.373				1.822													0.7				0.7				0.8				1
	1.627				0.933				1.161				1.201													1.3				1.2				0.7				1.2
	1.266				1.283				1.381				0.972													0.8				0.7				0.6				0.6
	1.151				2.467				1.29				1.3													0.7				1				1.1				1.3
	1.224				1.265				1.148				1.287													1.2				0.7				0.6				0.6
	0.731				1.491				1.081				1.219													0.6				1.8				0.8				0.7
	1.062				1.014				1.457				1.908													1.1				1.7				0.7				0.6
	0.907				1.12				0.974				2.181													1.1				0.6				2.2				0.9
	1.227				1.342				1.178				1.413													0.7				0.9				0.7				0.7
	1.148				1.026				1.144				1.548													2.6				0.6				1.5				1.1
	1.395				1.449				1.032				0.779													0.7				0.6				1				0.6
	1.188				1.406				1.373				0.966													1.4				0.9				0.7				0.8
	1.76				1.333				1.16				1.478													0.7				0.6				1				0.9
	1.443				1.215				1.269				3.311													2				0.7				0.7				1.5
	0.852				1.325				1.015				0.881													0.9				2				1.3				0.6
	1.469				0.963				1.312				3.197													0.9				0.9				0.7				0.6
	0.845				1.239				1.259				1.013													0.6				0.7				0.8				0.9
	0.83				2.1				1.114				1.643													1.2				0.6				1.4				0.7
	1.241				1.549				1.2				1.119													1.5				0.6				0.6				0.7
	1.624				1.505				1.401				1.142													0.8				1.5				0.6				0.6
	1.295				1.443				0.799				2.15													0.7				2				0.8				0.7
	1.109				1.266				0.763				3.017													1.3				1.1				0.7				0.8
	1.078				1.096				1.337				2.614													0.7				1.2				1.1				1.6
	1.291				1.373				1.453				1.032													0.9				0.7				1.2				0.7
	1.185				1.596				1.051				1.047													1				1.3				0.7				0.9
	1.275				1.035				0.964				2.637													1.1				0.7				1.5				2.4
	1.656				1.291				1.328				1.179													0.7				2				2				0.6
	1.165				1.049				1.286				3.027													0.8				1.8				0.6				0.8
	1.24				1.006				1.28				2.27													0.6				0.8				0.8				0.7
	1.762				0.756				1.321				1.42													0.6				0.9				0.7				1.7
	1.261				1.299				1.257				1.768													0.8				0.8				0.8				0.7
	1.066				1.211				0.989				1.51													0.7				1.1				0.7				0.9
	2.008				1.14				1.005				1.177													0.8				0.8				0.7				0.6
	1.129				1.289				1.42				0.893													0.7				0.9				0.9				0.8
	1.322				1.425				0.979				2.611													1.2				0.9				2.1				0.8
	1.751				1.333				0.92				1.547													0.9				0.9				0.6				0.8
	1.194				1.389				1.196				2.701													1.2				0.6				0.6				0.6
	1.013				1.558				1.409				2.915													0.6				0.7				1				0.6
	1.526				1.35				0.965				2.883													1.5				1.2				0.6				2.5
	1.406				1.287				1.19				1.831													0.8				0.6				0.6				1.5
	1.831				1.861				1.05				2.297													0.8				0.6				1.4				0.6
	1.982				1.304				1.084				1.618													0.6				0.7				2.4				0.6
	1.344				1.224				1.392				0.99													0.6				2.6				0.7				0.6
	1.245				1.365				2.199				2.133													1				1.2				0.8				0.8
	1.301				1.343				1.448				2.676													0.7				0.8				1.1				0.7
	1.082				1.353				1.075				1.984													0.7				0.9				1.2				0.6
	1.16				1.518				0.926				1.721													2.1				0.6				0.7				0.7
	1.184				1.334				1.19				1.166													0.7				0.6				1.8				0.6
	0.806				1.318				1.026				1.93													0.7				1.5				0.6				0.8
	1.23				1.302				0.886				2.627													2.5				0.7				0.8				0.6
	1.554				1.237				1.335				1.982													1.1				0.9				0.7				0.6
	1.07				1.125				1.265				1.37													0.7				0.6				0.6				0.9
	1.946				1.64				1.559				1.534													0.8				1.7				1.2				0.6
	1.424				1.554				1.348				1.507													1				1.2				0.6				1.3
	1.328				1.305				1.424				1.642													0.6				1.1				0.9				1.6
	1.589				1.712				0.843																	0.6				0.6				0.6
	2.339				1.265				0.677																	1				0.6				0.6
	0.833				1.394				1.023																	0.8				0.9				0.7
	1.033				1.254				1.308																	0.8				2.4				0.7
	0.999				1.409				1.221																	0.7				0.9				0.6
	0.907				1.389				1.101																	1.1				0.9				0.9
	1.387				1.805				1.154																	0.8				0.6				1.1
	1.425				1.869				1.145																	0.7				0.6				1.1
	1.241				0.989				1.133																	0.7				0.6				1.1
	1.302				0.961				1.104																	1.5				0.6				0.7
	1.643				1.037				1.621																	0.7				1.1				0.8
	1.155				2.75				0.81																	0.6				0.9				0.9
	1.287				0.988				0.926																	0.8				0.9				1.7
	0.82				1.418				1.095																	0.6				1.5				0.6
	1.272				2.798				1.34																	1.6				0.7				0.8
	1.854				1.404				1.204																	0.8				0.6				0.7
	2.029				1.774				1.246																	0.6				1.1				0.8
	1.109				1.261				1.293																	0.6				1.3				0.8
	1.015				1.143				1.666																	1.4				0.6				0.6
	1.173				1.09				0.928																	0.7				0.6				0.8
	1.112				1.377				1.383																	0.9				0.6				1.4
	1.292				1.608				1.587																	0.6				0.6				0.8
	1.368				1.558				1.161																	1.8				0.6				1.1
	1.259				1.177				0.934																	0.7				0.8				1.3
	1.158				1.429				1.096																	1				0.6				0.6
	1.169				1.02				1.33																	1.2				0.6				0.6
	1.207				1				1.25																	0.7				1.3				1.2
	1.503				1.529				1.316																	0.9				0.8				1
	1.23				1.426				1.15																	0.9				0.6				1.2
	1.455				1.219				1.319																	0.7				1.9				0.6
	1.334				1.085				1.125																	0.9				0.7				1
	0.943				1.744				0.907																	0.8				0.6				0.7
	0.909				1.553				1.491																	1.7				0.9				1.9
	1.124				1.381				1.413																	0.8				1.6				0.9
	0.925				2.863				1.699																	0.6				0.9				0.6
	1.121				0.828				1.048																	0.7				0.6				0.9
	1.664				1.418				0.94																	1.5				1				0.6
	0.787				1.45				1.299																	0.8				0.8				1.3
	1.706				1.852				1.137																	0.7				0.6				1.7
	0.793				1.806				1.33																	0.6				1				0.8
	1.177				0.947				1.079																	0.9				0.9				1.6
	0.945				0.987				0.941																	0.6				0.6				0.8
	1.077				1.257				0.955																	0.7				0.6				1.4
	0.953				1.304				0.982																	0.7				0.7				0.6
	1.208				2.968				0.876																	0.8				1.3				0.7
	1.32				1.745				1.218																	0.6				0.7				1
	1.31				0.796				1.119																	0.9				0.6				1.4
	1.274				1.415				1.217																	1				0.8				1.3
	1.352				1.289				1.567																	0.6				0.9				0.6
	0.91				1.41				1.524																	0.9				1.2				0.7
	1.232				1.526				2.023																	1.4				0.9				0.7
	1.383				1.374				1.606																	1.5				0.7				0.8
	1.749				0.906				1.316																	1.3				0.7				1.5
	1.205				1.6				1.061																	1				1.2				0.9
	1.376				1.379				1.074																	0.6				0.6				1.2
	1.696				1.516				1.591																	1.5				0.8				1.1
	1.603				2.788				1.426																	0.8				0.7				0.8
	1.206				2.392				1.634																	0.6				0.7				0.7
	1.163				1.163				1.161																	0.8				0.6				2.3
	1.526				0.964				1.281																	0.6				0.7				1
	0.925				1.318				1.039																	0.6				0.7				0.7
	1.348				0.666				1.379																	1				1				0.9
	1.046				1.574				0.588																	0.7				1.3				0.7
	0.999				0.937				1.49																	1.1				0.6				0.6
	1.205				1.247				1.255																	0.7				0.9				1.2
	1.726				1.042				0.987																	0.8				0.6				1.2
	1.811				1.321				1.125																	0.8				0.6				0.8
	1.811				1.61				1.079																	0.6				0.7				0.7
	0.805				1.555				0.757																	1.4				0.6				0.6
	1.624				1.213				1.369																	1.2				0.6				0.8
	1.787				1.583				1.792																	0.6				1.2				0.6
	1.037				1.4				1.575																	0.6				0.9				0.6
	1.058				1.482				1.454																	1.5				0.6				0.7
	0.751				1.358				1.291																	0.7				0.6				0.9
	0.895				1.618				1.364																	0.7				0.6				0.6
	1.128				1.963				1.246																	2.2				0.6				1
	1.07				1.268				0.751																	0.7				0.6				0.6
	0.881				1.136				0.972																	0.7				1.2				0.9
	1.249				1.434				1.008																	0.8				1.2				0.7
	0.846				1.266				2.705																	0.7				1				1
	1.029				1.548				2.337																	0.6				0.6				1.5
	0.958				1.559				1.606																	1.2				0.7				1.1
	1.094				1.749				1.572																	0.8				0.6				1.2
	1.196				1.145				0.988																	1.8				0.8				0.6
	1.229				1.211				1.539																	1.4				1.1				1
	0.961				1.624				0.623																	0.8				0.6				0.6
	1.193				1.549				0.899																	0.7				1				0.6
	1.323				1.505				0.778																	0.8				1.2				0.6
	1.492				1.412				0.804																	1				1.1				0.6
	1.223				1.164				1.526																	1.1				0.6				1.1
	1.325				1.136				0.73																	1.4				1.3				0.6
	1.284				1.32				1.624																	0.9				0.7				0.8
	1.308				0.99				0.998																	2.3				0.8				0.8
	0.877				1.446				1.624																	1.4				0.7				0.6
	1.329				1.61				1.096																	0.7				0.8				0.6
	1.497				1.762				1.018																	0.9				0.6				0.8
	0.974				1.395				1.208																	0.6				1.3				1.1
	0.991				1.445				0.704																	1				0.8				0.7
	1.005				1.524				0.935																	1				1.3				0.8
	1.546				1.482				1.153																	0.8				1.2				0.7
	1.407				1.51				2.177																	1				0.9				0.8
	1.38				1.259				1.469																	2				2.2				0.8
	1.5				1.767				1.002																	2.3				0.8				0.6
	1.539				3.622				1.509																	0.6				0.7				0.9
	0.774				1.425				1.337																	0.6				1				0.8
	1.071				2.198				1.368																	1.8				0.6				0.6
	1.347				0.83				1.587																	0.7				0.7				0.6
	0.889				0.739				1.154																	0.6				0.6				0.6
	1.5				0.945				1.464																	1.2				0.8				0.8
	1.204				1.18				1.065																	0.8				1				1.6
	1.814				0.907				0.682																	0.6				0.6				0.7
	0.988				1.044				0.894																	0.6				0.7				0.8
	0.773				1.508				0.904																	0.8				0.6				0.6
	1.648				2.305				2.257																	0.8				0.6				1
	1.235				1.259				1.255																	0.6				0.6				1
	0.999				1.14				1.227																	0.6				1.6				1
	1.144				0.953				0.984																	0.9				0.7				1.3
	1.504				0.915				0.924																	0.8				0.8				0.6
	1.463				1.158				0.667																	2.6				1				0.7
	1.303				0.953				1.509																	2.7				0.9				1.9
	1.184				1.381				1.219																	1				1.5				0.7
	1.14				1.708				0.877																	1				0.6				0.9
	0.979				1.474				1.206																	1				0.7				0.7
	1.095				1.498				1.225																	0.8				2.6				1.1
	0.868				1.542				0.782																	0.6				1.3				0.6
	1.576				1.541				0.902																	0.9				1.5				1.3
	1.113				1.558				1.126																	0.6				0.6				0.7
	1.453				1.693				1.109																	0.7				0.9				1.1
	1.704				1.241				1.109																	0.7				1.6				1.7
	1.28				1.452				0.761																	1.5				0.7				0.7
	1.535				1.471				1.166																	0.6				1.4				0.6
	1.225				1.853				0.925																	0.6				0.7				1.2
	1.309				1.506				1.287																	1				1.3				0.6
	1.329				1.368				0.699																	1.5				1				0.9
	1.558				1.334				0.64																	0.6				0.8				0.7
	2.48				1.533				1.192																	0.6				2				0.6
	1.789				1.574				0.655																	0.9				0.6				0.6
	1.666				1.03				0.583																	0.6				0.6				0.7
	1.345				2.421				1.137																	0.8				0.7				1.2
	1.263				1.178				1.339																	0.8				0.6				0.6
	1.592				1.364				1.342																	1.1				1.5				1.5
	1.31				1.384				1																	0.8				0.6				0.8
	1.923				1.26				0.968																	1.1				0.8				0.8
	1.431				1.681				0.843																	1				0.6				1
	1.158				1.018				1.279																	1.6				0.6				0.7
	1.119				1.01				1.161																	1				0.9				1.3
	1.223				1.301				1.3																	0.9				0.9				0.8
	1.042				1.389				1.181																	0.6				0.6				0.9
	1.38				1.783				1.388																	1.1				0.7				0.8
	0.934				2.483				0.999																	0.6				0.8				0.8
	1.437				1.051				1.215																	0.9				0.7				0.8
	1.155				1.441				1.345																	0.6				2				1.6
	0.899				1.135				1.358																	0.6				1				1.1
	1.326				1.552				0.906																	1				0.6				0.7
	1.305				1.686				1.052																	0.7				0.6				0.8
	0.977				1.212				1.297																	0.7				0.6				0.6
	1.022				1.751				1.408																	0.6				0.6				0.9
	0.884				1.473				1.088																	1.6				1.3				1.4
	0.902				1.18				0.664																	1				0.7				0.7
	1.187				1.137				0.95																	0.7				0.6				0.7
	1.241				1.343				1.029																	1.4				0.7				0.8
	1.343				1.058				0.737																	0.8				0.7				0.8
	1.786				1.316				0.579																	0.9				0.7				0.6
	1.089				1.512				1.041																	0.8				0.6				0.8
	1.448				1.507				0.82																	0.6				1.2				0.6
	1.456				1.262				1.117																	1.2				0.7				0.8
	1.168				1.405				1.192																	1.3				0.6				0.9
	1.285				1.07				0.815																	0.7				0.6				0.6
	1.18				1.057				0.866																	2.7				1				1.3
	1.036				1.662				0.931																	1.5				0.9				0.6
	1.502				1.225				1.022																	1.6				1.7				0.7
	1.217				1.421				1.325																	3.6				1.7				0.8
	0.931				1.234				1.238																	0.7				0.7				1
	1.303				2.037				1.355																	1.7				0.8				1.2
	1.062				0.968				1.17																	0.8				1.5				0.8
	1.365				1.222				1.185																	1				1.4				0.7
	0.673				1.413				1.474																	0.6				0.6				1
	2.265				1.034				1.395																	0.9				0.7				1
	1.455				1.858				1.297																	2.1				0.9				1.2
	1.484				1.246				1.382																	1				2.5				1.6
	1.569				1.372				1.248																	0.7				0.8				0.7
	1.357				1.341				1.327																	1.5				1.8				1.1
	1.338				1.969				0.864																	0.7				0.7				0.7
	1.414				1.837				1.254																	1.4				0.7				2.2
	1.452				1.724				0.876																	1.3				1.4				0.6
	1.172				1.399				0.57																	0.7				1.4				0.6
	1.222				1.362				0.598																	1.2				0.7				0.6
	1.409				1.643				1.03																	0.6				0.6				1.4
	1.507				1.471				1.329																	0.6				0.7				0.6
	1.153				1.243				1.284																	0.7				1.5				1.4
	1.477				1.499				1.094																	0.8				0.7				1.3
	1.284				1.119				0.913																	0.7				1.2				0.6
	1.547				0.773				0.951																	0.8				0.7				0.6
	0.957				0.776				0.873																	0.8				0.7				0.6
	1.452				1.063				1.089																	0.6				1.1				0.7
	1.267				1.058				0.925																	1.4				0.9				0.8
	1.225				0.77				1.103																	0.8				0.6				0.6
	1.468				0.754				0.817																	0.6				0.6				0.7
	1.01				1.047				1.37																	1.1				0.8				0.6
	1.087				0.836				0.858																	1.4				0.6				1.2
	1.465				1.122				1.269																	0.7				0.7				0.6
	1.2				0.988				1.385																	1.8				3				0.9
	1.096				0.762				1.264																	1.1				0.6				0.7
	0.877				1.003				1.17																	1.2				0.7				0.7
	1.111				0.8				0.861																	0.9				1.7				0.8
	1.144				1.212				0.984																	2.3				0.6				0.8
	1.513				1.192				1.242																	0.7				1.6				1.2
	1.461				0.911				1.319																	0.6				0.9				1
	1.218				0.792				1.202																	0.7				0.8				0.7
	1.487				0.886				1.163																	1				1.3				1.2
	1.82				1.097				0.931																	0.8				0.7				0.6
	1.283				1.178				1.196																	1.3				0.7				0.7
	1.16				1.493				0.785																	0.7				1				0.7
	0.81				0.992				1.02																	0.9				0.9				0.7
	1.146				1.023				1.085																	0.8				2.1				0.7
	1.713				0.967				0.919																	0.6				0.9				0.7
	1.238				1.235				0.927																	1				0.9				0.6
	1.133				1.103				0.678																	1.9				1.3				1
	1.367				1.025				0.803																	0.9				1.1				1
	1.225				0.756				0.775																	1.3				0.6				0.6
	1.152				0.903				1.351																	0.8				0.6				0.8
	1.431				1.182				0.919																	2				0.9				0.8
	1.173				0.689				0.963																	0.6				0.6				0.6
[truncated: 6,197 more rows]
[truncated: 18 more columns]

## Sheet: Figure 3 - Figure supplement 1C
Figure 3 - Figure supplement 1C
	1	Raw data is the same as in Figure 3 - Figure supplement 1B
	2	Fit results
	3	Original histograms + fitted curves
	2		Control	KIF13B-KO	KIF13B-KO mixed	KIF5-KO	KIF5B/KIF13B-KO	4X-KO + KIF13B	4X-KO + KIF5B		3	Control						KIF13-KO						KIF13-KO mixed						KIF5-KO						4X-KO + KIF13B						4X-KO + KIF5B
		Comparison of Fits										Speed (mm/s)						Speed (mm/s)						Speed (mm/s)						Speed (mm/s)						Speed (mm/s)						Speed (mm/s)
		Null hypothesis	Gaussian	Gaussian	Gaussian	Gaussian	Gaussian	Gaussian	Gaussian			Histogram bin	Fraction	Fitted curve	Slow fraction of fit	Fast fraction of fit		Histogram bin	Fraction	Fitted curve	Slow fraction of fit	Fast fraction of fit		Histogram bin	Fraction	Fitted curve	Slow fraction of fit	Fast fraction of fit		Histogram bin	Fraction	Fitted curve	Slow fraction of fit	Fast fraction of fit		Histogram bin	Fraction	Fitted curve	Slow fraction of fit	Fast fraction of fit		Histogram bin	Fraction	Fitted curve	Slow fraction of fit	Fast fraction of fit
		Alternative hypothesis	Sum of two Gaussians	Sum of two Gaussians	Sum of two Gaussians	Sum of two Gaussians	Sum of two Gaussians	Sum of two Gaussians	Sum of two Gaussians			0.2	0					0.2	0.000149656					0.2	0					0.2	0					0.2	0					0.2	0
		P value	< 0.0001	< 0.0001	< 0.0001	< 0.0001	< 0.0001	< 0.0001	< 0.0001			0.25	0					0.25	0					0.25	0					0.25	0					0.25	0					0.25	0
		Conclusion (alpha = 0.05)	Reject null hypothesis	Reject null hypothesis	Reject null hypothesis	Reject null hypothesis	Reject null hypothesis	Reject null hypothesis	Reject null hypothesis			0.3	0					0.3	0					0.3	0					0.3	0					0.3	0					0.3	0
		Preferred model	Sum of two Gaussians	Sum of two Gaussians	Sum of two Gaussians	Sum of two Gaussians	Sum of two Gaussians	Sum of two Gaussians	Sum of two Gaussians			0.35	0					0.35	0					0.35	0					0.35	0					0.35	0					0.35	0
		F (DFn, DFd)	154.6 (3,96)	20.57 (3,96)	12.16 (3,96)	9.034 (3,96)	19.74 (3,96)	21.02 (3,96)	41.50 (3,96)			0.4	0					0.4	0					0.4	0.000244141					0.4	0					0.4	0					0.4	0
												0.45	0					0.45	0					0.45	0.000244141					0.45	0					0.45	0					0.45	0.00123872
		Gaussian										0.5	0.00056346					0.5	0.000598623					0.5	0.00109863					0.5	0.00225734					0.5	0.000131303					0.5	0.0017696
		Best-fit values										0.55	0.00197211					0.55	0.000897935					0.55	0.00244141					0.55	0.00112867					0.55	0.00170693					0.55	0.00389312
		Amplitude	0.06348	0.07302	0.06852	0.0291	0.02632	0.03904	0.07051			0.6	0.00394422					0.6	0.00179587					0.6	0.00671387					0.6	0.00225734					0.6	0.00170693					0.6	0.00654751
		Mean	1.234	1.236	1.202	1.861	1.672	1.611	1.114			0.65	0.00704325					0.65	0.00478898					0.65	0.00878906					0.65	0.00507901					0.65	0.00288866					0.65	0.0138029
		SD	0.2921	0.2601	0.2841	0.6982	0.7431	0.5151	0.264			0.7	0.010424					0.7	0.00853038					0.7	0.015625					0.7	0.00282167					0.7	0.00695903					0.7	0.0187577
		Std. Error										0.75	0.0149317					0.75	0.0148159					0.75	0.0186768					0.75	0.00846501					0.75	0.00840336					0.75	0.0318528
		Amplitude	0.0009024	0.0006569	0.0005181	0.0006579	0.0009696	0.0004883	0.0008556			0.8	0.0204254					0.8	0.0205028					0.8	0.0257568					0.8	0.00677201					0.8	0.0110294					0.8	0.0350381
		Mean	0.004795	0.002702	0.002481	0.01821	0.03167	0.007436	0.003699			0.85	0.0256374					0.85	0.0264891					0.85	0.0294189					0.85	0.013544					0.85	0.0139181					0.85	0.044063
		SD	0.004795	0.002702	0.002481	0.01841	0.03286	0.007454	0.003699			0.9	0.0342302					0.9	0.0291829					0.9	0.0397949					0.9	0.0129797					0.9	0.015625					0.9	0.0509644
		95% Confidence Intervals										0.95	0.0383153					0.95	0.037414					0.95	0.0480957					0.95	0.0180587					0.95	0.0170693					0.95	0.0539727
		Amplitude	0.06168 to 0.06527	0.07172 to 0.07433	0.06749 to 0.06955	0.02779 to 0.03041	0.02439 to 0.02824	0.03807 to 0.04001	0.06881 to 0.07221			1	0.0436681					1	0.0483388					1	0.0546875					1	0.013544					1	0.019958					1	0.0652982
		Mean	1.224 to 1.243	1.230 to 1.241	1.197 to 1.207	1.825 to 1.897	1.609 to 1.735	1.596 to 1.626	1.107 to 1.121			1.05	0.0549373					1.05	0.0588147					1.05	0.0635986					1.05	0.0208804					1.05	0.0236345					1.05	0.0720226
		SD	0.2826 to 0.3016	0.2548 to 0.2655	0.2792 to 0.2890	0.6616 to 0.7348	0.6778 to 0.8084	0.5002 to 0.5299	0.2566 to 0.2713			1.1	0.0570503					1.1	0.0651003					1.1	0.0598144					1.1	0.0163657					1.1	0.0216649					1.1	0.0730844
		Goodness of Fit										1.15	0.0660657					1.15	0.0683927					1.15	0.0684814					1.15	0.023702					1.15	0.0265231					1.15	0.07043
		Degrees of Freedom	99	99	99	99	99	99	99			1.2	0.064657					1.2	0.0677941					1.2	0.0639648					1.2	0.0208804					1.2	0.0341387					1.2	0.0633516
		R square	0.9829	0.9934	0.9953	0.9407	0.84	0.9843	0.9878			1.25	0.0635301					1.25	0.0716851					1.25	0.0683594					1.25	0.0197517					1.25	0.0340073					1.25	0.0637055
		Absolute Sum of Squares	0.0005565	0.0002627	0.0001784	0.0007026	0.0016	0.0002869	0.0004521			1.3	0.0640935					1.3	0.0727327					1.3	0.0670166					1.3	0.0197517					1.3	0.035583					1.3	0.0566272
		Sy.x	0.002371	0.001629	0.001343	0.002664	0.004021	0.001702	0.002137			1.35	0.0600084					1.35	0.0707872					1.35	0.0615234					1.35	0.0214447					1.35	0.0366334					1.35	0.0417625
		Constraints										1.4	0.051134					1.4	0.0630051					1.4	0.0524902					1.4	0.0332957					1.4	0.0336135					1.4	0.035215
		SD	SD > 0.0	SD > 0.0	SD > 0.0	SD > 0.0	SD > 0.0	SD > 0.0	SD > 0.0			1.45	0.0422595					1.45	0.0502843					1.45	0.0467529					1.45	0.0197517					1.45	0.0379464					1.45	0.0272518
												1.5	0.0387378					1.5	0.0431009					1.5	0.0368652					1.5	0.0208804					1.5	0.0397847					1.5	0.0268979
		Sum of two Gaussians										1.55	0.0332441					1.55	0.0327746					1.55	0.0310059					1.55	0.0197517					1.55	0.038209					1.55	0.0194656
		Best-fit values										1.6	0.0284547					1.6	0.0233463					1.6	0.0283203					1.6	0.025395					1.6	0.0359769					1.6	0.0148646
		Amplitude1	0.0596	0.07193	0.06818	0.008356	0.01938	0.01462	0.06868			1.65	0.0194394					1.65	0.0203532					1.65	0.0200195					1.65	0.0299097					1.65	0.0389968					1.65	0.0134489
		Mean1	1.202	1.229	1.196	1.091	1.296	1.227	1.1			1.7	0.0188759					1.7	0.0136187					1.7	0.0133057					1.7	0.0327314					1.7	0.0313813					1.7	0.0102637
		SD1	0.2562	0.2517	0.2778	0.221	0.3953	0.303	0.2474			1.75	0.0160586					1.75	0.00942831					1.75	0.0106201					1.75	0.028781					1.75	0.0391282					1.75	0.00849407
		Amplitude2	0.009386	0.003053	0.002169	0.02862	0.01602	0.03251	0.005427			1.8	0.0140865					1.8	0.009129					1.8	0.00805664					1.8	0.0259594					1.8	0.0345326					1.8	0.00725535
		Mean2	1.707	1.893	1.957	1.956	2.147	1.758	1.704			1.85	0.0111283					1.85	0.00942831					1.85	0.00732422					1.85	0.0316027					1.85	0.0328256					1.85	0.00460096
		SD2	0.4896	0.5799	0.4974	0.6332	0.7581	0.4759	0.5251			1.9	0.0112692					1.9	0.00538761					1.9	0.00524902					1.9	0.0265237					1.9	0.0336135					1.9	0.00389312
		Std. Error										1.95	0.0105649					1.95	0.00553727					1.95	0.00415039					1.95	0.027088					1.95	0.0333508					1.95	0.00513184
		Amplitude1	0.002567	0.001792	0.001908	0.001976	0.008169	0.009556	0.002689			2	0.00732498					2	0.00404071					2	0.00390625					2	0.0242664					2	0.0294118					2	0.004424
		Mean1	0.003063	0.002605	0.004711	0.03494	0.03881	0.04503	0.003241			2.05	0.00676152					2.05	0.00404071					2.05	0.00305176					2.05	0.0231377					2.05	0.0262605					2.05	0.00424704
		SD1	0.006099	0.004833	0.004649	0.0542	0.08695	0.06375	0.006419			2.1	0.00760671					2.1	0.00419036					2.1	0.00146484					2.1	0.0276524					2.1	0.0263918					2.1	0.00230048
		Amplitude2	0.001314	0.0007063	0.0005969	0.0006681	0.003486	0.004992	0.00107			2.15	0.00591633					2.15	0.0026938					2.15	0.000854492					2.15	0.0276524					2.15	0.0244223					2.15	0.00230048
		Mean2	0.1196	0.3194	0.442	0.0393	0.3508	0.1203	0.2424			2.2	0.005212					2.2	0.00239449					2.2	0.00244141					2.2	0.0327314					2.2	0.0198267					2.2	0.00194656
		SD2	0.05228	0.1837	0.2953	0.03202	0.1703	0.04814	0.1314			2.25	0.00464854					2.25	0.00194553					2.25	0.00317383					2.25	0.0276524					2.25	0.0137868					2.25	0.00371616
		95% Confidence Intervals										2.3	0.00253557					2.3	0.00194553					2.3	0.0020752					2.3	0.0208804					2.3	0.0170693					2.3	0.00247744
		Amplitude1	0.05450 to 0.06470	0.06837 to 0.07549	0.06439 to 0.07197	0.004428 to 0.01228	0.003140 to 0.03562	-0.004379 to 0.03362	0.06333 to 0.07402			2.35	0.00366249					2.35	0.00179587					2.35	0.000366211					2.35	0.0231377					2.35	0.0133929					2.35	0.0017696
		Mean1	1.196 to 1.208	1.224 to 1.234	1.187 to 1.205	1.022 to 1.161	1.219 to 1.373	1.137 to 1.316	1.093 to 1.106			2.4	0.00309903					2.4	0.0026938					2.4	0.00183106					2.4	0.020316					2.4	0.0137868					2.4	0.0017696
		SD1	0.2441 to 0.2684	0.2420 to 0.2613	0.2686 to 0.2871	0.1133 to 0.3288	0.2225 to 0.5682	0.1763 to 0.4297	0.2347 to 0.2602			2.45	0.0023947					2.45	0.00104759					2.45	0.00109863					2.45	0.0180587					2.45	0.0124737					2.45	0.00300832
		Amplitude2	0.006773 to 0.01200	0.001649 to 0.004458	0.0009828 to 0.003356	0.02729 to 0.02995	0.009092 to 0.02295	0.02258 to 0.04243	0.003301 to 0.007553			2.5	0.00464854					2.5	0.00104759					2.5	0.000854492					2.5	0.0197517					2.5	0.0111607					2.5	0.00230048
		Mean2	1.469 to 1.945	1.258 to 2.528	1.079 to 2.836	1.878 to 2.034	1.449 to 2.844	1.519 to 1.997	1.222 to 2.186			2.55	0.0028173					2.55	0.000897935					2.55	0.000488281					2.55	0.0231377					2.55	0.00827206					2.55	0.00159264
		SD2	0.3857 to 0.5936	0.2147 to 0.9451	0.0 to 1.084	0.5695 to 0.6969	0.4196 to 1.097	0.3802 to 0.5716	0.2640 to 0.7863			2.6	0.00112692					2.6	0.0013469					2.6	0.000976562					2.6	0.0191874					2.6	0.00866597					2.6	0.00212352
		Goodness of Fit										2.65	0.00154951					2.65	0.00119725					2.65	0.00109863					2.65	0.0158014					2.65	0.0052521					2.65	0.00247744
		Degrees of Freedom	96	96	96	96	96	96	96			2.7	0.00169038					2.7	0.000598623					2.7	0.00109863					2.7	0.011851					2.7	0.00420168					2.7	0.00194656
		R square	0.9971	0.996	0.9966	0.9538	0.901	0.9905	0.9947			2.75	0.00154951					2.75	0.00119725					2.75	0.000610352					2.75	0.018623					2.75	0.00380777					2.75	0.00159264
		Absolute Sum of Squares	9.544e-05	0.0001599	0.0001293	0.0005479	0.0009898	0.0001732	0.0001968			2.8	0.000845189					2.8	0.00194553					2.8	0.000488281					2.8	0.0124154					2.8	0.00301996					2.8	0.00141568
		Sy.x	0.0009971	0.001291	0.001161	0.002389	0.003211	0.001343	0.001432			2.85	0.00154951					2.85	0.000748279					2.85	0.000366211					2.85	0.00790068					2.85	0.00249475					2.85	0.00141568
		Constraints										2.9	0.000704325					2.9	0.000448967					2.9	0.000610352					2.9	0.00902935					2.9	0.00262605					2.9	0.00123872
		SD1	SD1 > 0.0	SD1 > 0.0	SD1 > 0.0	SD1 > 0.0	SD1 > 0.0	SD1 > 0.0	SD1 > 0.0			2.95	0.00140865					2.95	0.00104759					2.95	0.000488281					2.95	0.00564334					2.95	0.00144433					2.95	0.000707839
		SD2	SD2 > 0.0	SD2 > 0.0	SD2 > 0.0	SD2 > 0.0	SD2 > 0.0	SD2 > 0.0	SD2 > 0.0			3	0.000845189					3	0.000149656					3	0.00012207					3	0.00564334					3	0.00236345					3	0.000884799
		Number of points										3.05	0.00028173					3.05	0.000299312					3.05	0.000488281					3.05	0.00790068					3.05	0.00170693					3.05	0.000884799
		Analyzed	102	102	102	102	102	102	102			3.1	0.00056346					3.1	0.000448967					3.1	0.00012207					3.1	0.00564334					3.1	0.000656513					3.1	0.00123872
												3.15	0.000845189					3.15	0.000748279					3.15	0.000366211					3.15	0.00564334					3.15	0.00131302					3.15	0.00106176
												3.2	0.00126778					3.2	0.00104759					3.2	0.000488281					3.2	0.00507901					3.2	0.00105042					3.2	0.00123872
												3.25	0					3.25	0.000598623					3.25	0.000488281					3.25	0.00507901					3.25	0.00052521					3.25	0.00106176
												3.3	0.00028173					3.3	0.000299312					3.3	0.000488281					3.3	0.00112867					3.3	0.000262605					3.3	0.00053088
												3.35	0.000140865					3.35	0.000448967					3.35	0.00012207					3.35	0.00225734					3.35	0.00052521					3.35	0.00035392
												3.4	0.00028173					3.4	0.000299312					3.4	0.00012207					3.4	0.00282167					3.4	0.000656513					3.4	0.00017696
												3.45	0.000422595					3.45	0					3.45	0					3.45	0.00225734					3.45	0.000262605					3.45	0.00053088
												3.5	0					3.5	0.000598623					3.5	0.000244141					3.5	0.00225734					3.5	0.000262605					3.5	0.00017696
												3.55	0.000422595					3.55	0.000448967					3.55	0.000244141					3.55	0.001693					3.55	0.000131303					3.55	0
												3.6	0.00028173					3.6	0.000448967					3.6	0.00012207					3.6	0.00282167					3.6	0.000393908					3.6	0.00035392
												3.65	0					3.65	0.000448967					3.65	0					3.65	0.000564334					3.65	0.000131303					3.65	0.00035392
												3.7	0					3.7	0.000149656					3.7	0.00012207					3.7	0					3.7	0.000131303					3.7	0.00017696
												3.75	0					3.75	0.000448967					3.75	0					3.75	0					3.75	0.000131303					3.75	0.00035392
												3.8	0					3.8	0.000299312					3.8	0					3.8	0.000564334					3.8	0.000262605					3.8	0
												3.85	0					3.85	0.000299312					3.85	0.00012207					3.85	0.00112867					3.85	0.000131303					3.85	0.00017696
												3.9	0.000140865					3.9	0.000448967					3.9	0.000244141					3.9	0					3.9	0					3.9	0.00017696
												3.95	0					3.95	0.000149656					3.95	0					3.95	0.000564334					3.95	0					3.95	0
												4	0					4	0.000149656					4	0.00012207					4	0					4	0					4	0.00017696
												4.05	0					4.05	0.000149656					4.05	0					4.05	0.00282167					4.05	0.000131303					4.05	0
												4.1	0.000140865					4.1	0					4.1	0					4.1	0.000564334					4.1	0					4.1	0
												4.15	0					4.15	0					4.15	0					4.15	0.00112867					4.15	0					4.15	0
												4.2	0					4.2	0					4.2	0					4.2	0.000564334					4.2	0					4.2	0
												4.25	0					4.25	0					4.25	0					4.25	0					4.25	0					4.25	0.00017696
												4.3	0					4.3	0					4.3	0					4.3	0					4.3	0.000131303					4.3	0
												4.35	0					4.35	0					4.35	0					4.35	0.000564334					4.35	0					4.35	0
												4.4	0					4.4	0					4.4	0					4.4	0					4.4	0					4.4	0
												4.45	0					4.45	0					4.45	0					4.45	0					4.45	0					4.45	0
												4.5	0					4.5	0					4.5	0					4.5	0					4.5	0.000131303					4.5	0.00017696
												4.55	0					4.55	0					4.55	0					4.55	0.000564334					4.55	0					4.55	0
												4.6	0					4.6	0					4.6	0					4.6	0					4.6	0					4.6	0
												4.65	0					4.65	0.000149656					4.65	0					4.65	0					4.65	0					4.65	0
												4.7	0					4.7	0					4.7	0					4.7	0.000564334					4.7	0					4.7	0
												4.75	0					4.75	0					4.75	0					4.75	0					4.75	0					4.75	0
												4.8	0.000140865					4.8	0					4.8	0					4.8	0					4.8	0					4.8	0
												4.85	0.000140865					4.85	0					4.85	0.00012207					4.85	0					4.85	0					4.85	0
												4.9	0					4.9	0					4.9	0					4.9	0					4.9	0					4.9	0
												4.95	0					4.95	0					4.95	0					4.95	0					4.95	0					4.95	0
												5	0					5	0					5	0					5	0					5	0					5	0
												5.05	0					5.05	0					5.05	0					5.05	0					5.05	0					5.05	0
												5.1	0					5.1	0					5.1	0					5.1	0					5.1	0					5.1	0
												5.15	0					5.15	0					5.15	0					5.15	0					5.15	0					5.15	0
												5.2	0					5.2	0					5.2	0					5.2	0					5.2	0					5.2	0
												5.25	0					5.25	0					5.25	0					5.25	0					5.25	0					5.25	0
												0		2.25115e-05	9.89688e-07	2.15218e-05		0		1.52968e-05	4.78354e-07	1.48184e-05		0		7.38217e-06	6.43849e-06	9.43685e-07		0		0.000242465	4.26585e-08	0.000242422		0		3.94035e-05	4.01847e-06	3.5385e-05		0		3.15449e-05	3.49972e-06	2.80452e-05
												0.01		2.42931e-05	1.18767e-06	2.31054e-05		0.01		1.62545e-05	5.80305e-07	1.56742e-05		0.01		8.53406e-06	7.51291e-06	1.02116e-06		0.01		0.000254563	5.3281e-08	0.00025451		0.01		4.28232e-05	4.59056e-06	3.82326e-05		0.01		3.4013e-05	4.18533e-06	2.98276e-05
												0.02		2.62184e-05	1.4231e-06	2.47953e-05		0.02		1.72773e-05	7.02875e-07	1.65744e-05		0.02		9.85981e-06	8.75527e-06	1.10454e-06		0.02		0.000267201	6.64126e-08	0.000267134		0.02		4.65296e-05	5.2384e-06	4.12912e-05		0.02		3.67089e-05	4.99708e-06	3.17119e-05
												0.03		2.83002e-05	1.70259e-06	2.65976e-05		0.03		1.83711e-05	8.49991e-07	1.75211e-05		0.03		1.13841e-05	1.01899e-05	1.19425e-06		0.03		0.000280397	8.26113e-08	0.000280315		0.03		5.05459e-05	5.97115e-06	4.45748e-05		0.03		3.96594e-05	5.95653e-06	3.37029e-05
												0.04		3.0553e-05	2.03388e-06	2.85191e-05		0.04		1.95427e-05	1.02628e-06	1.85164e-05		0.04		1.31349e-05	1.18442e-05	1.29073e-06		0.04		0.000294175	1.02551e-07	0.000294072		0.04		5.48972e-05	6.799e-06	4.80982e-05		0.04		4.28946e-05	7.08861e-06	3.5806e-05
												0.05		3.29925e-05	2.42592e-06	3.05666e-05		0.05		2.07996e-05	1.23717e-06	1.95624e-05		0.05		1.51436e-05	1.37492e-05	1.39443e-06		0.05		0.000308555	1.27043e-07	0.000308428		0.05		5.96105e-05	7.73318e-06	5.18773e-05		0.05		4.64485e-05	8.42207e-06	3.80264e-05
												0.06		3.56366e-05	2.88914e-06	3.27475e-05		0.06		2.21505e-05	1.48905e-06	2.06614e-05		0.06		1.74458e-05	1.594e-05	1.50586e-06		0.06		0.000323561	1.57062e-07	0.000323404		0.06		6.47147e-05	8.78615e-06	5.59286e-05		0.06		5.036e-05	9.99003e-06	4.037e-05
												0.07		3.85048e-05	3.43556e-06	3.50693e-05		0.07		2.3605e-05	1.78939e-06	2.18156e-05		0.07		2.00814e-05	1.84559e-05	1.62554e-06		0.07		0.000339216	1.93777e-07	0.000339022		0.07		7.02412e-05	9.97163e-06	6.02696e-05		0.07		5.4673e-05	1.18306e-05	4.28424e-05
												0.08		4.16191e-05	4.07911e-06	3.754e-05		0.08		2.51744e-05	2.1469e-06	2.30275e-05		0.08		2.30953e-05	2.13413e-05	1.75401e-06		0.08		0.000355545	2.38586e-07	0.000355306		0.08		7.62236e-05	1.13047e-05	6.49189e-05		0.08		5.94371e-05	1.39873e-05	4.54498e-05
												0.09		4.5004e-05	4.83583e-06	4.01681e-05		0.09		2.68712e-05	2.57179e-06	2.42994e-05		0.09		2.65377e-05	2.46458e-05	1.89188e-06		0.09		0.000372573	2.93156e-07	0.000372279		0.09		8.26981e-05	1.28021e-05	6.9896e-05		0.09		6.47087e-05	1.65103e-05	4.81984e-05
												0.1		4.86865e-05	5.7242e-06	4.29623e-05		0.1		2.87099e-05	3.07591e-06	2.5634e-05		0.1		3.04648e-05	2.84251e-05	2.03976e-06		0.1		0.000390326	3.5947e-07	0.000389966		0.1		8.97034e-05	1.4482e-05	7.52214e-05		0.1		7.05511e-05	1.94565e-05	5.10946e-05
												0.11		5.26971e-05	6.76547e-06	4.59316e-05		0.11		3.07068e-05	3.67304e-06	2.70338e-05		0.11		3.49398e-05	3.27415e-05	2.19831e-06		0.11		0.000408831	4.39884e-07	0.000408392		0.11		9.72814e-05	1.63646e-05	8.09168e-05		0.11		7.70363e-05	2.2891e-05	5.41453e-05
												0.12		5.70697e-05	7.98397e-06	4.90857e-05		0.12		3.28808e-05	4.37917e-06	2.85016e-05		0.12		4.00327e-05	3.76645e-05	2.36823e-06		0.12		0.000428118	5.37186e-07	0.000427581		0.12		0.000105477	1.84717e-05	8.70051e-05		0.12		8.42451e-05	2.68879e-05	5.73573e-05
												0.13		6.18421e-05	9.40758e-06	5.24345e-05		0.13		3.5253e-05	5.21282e-06	3.00401e-05		0.13		4.58219e-05	4.32717e-05	2.55024e-06		0.13		0.000448215	6.54668e-07	0.00044756		0.13		0.000114338	2.08275e-05	9.35101e-05		0.13		9.22688e-05	3.1531e-05	6.07378e-05
												0.14		6.70566e-05	1.10682e-05	5.59884e-05		0.14		3.78477e-05	6.19538e-06	3.16523e-05		0.14		5.23943e-05	4.96492e-05	2.74514e-06		0.14		0.000469152	7.96212e-07	0.000468356		0.14		0.000123915	2.34581e-05	0.000100457		0.14		0.00010121	3.69156e-05	6.42942e-05
												0.15		7.27603e-05	1.3002e-05	5.97582e-05		0.15		4.06927e-05	7.35154e-06	3.33411e-05		0.15		5.98466e-05	5.68928e-05	2.95374e-06		0.15		0.000490962	9.66378e-07	0.000489996		0.15		0.000134265	2.63922e-05	0.000107873		0.15		0.000111183	4.31491e-05	6.80342e-05
												0.16		7.90059e-05	1.52506e-05	6.37553e-05		0.16		4.38193e-05	8.70969e-06	3.51096e-05		0.16		6.82858e-05	6.51089e-05	3.17691e-06		0.16		0.000513679	1.17051e-06	0.000512508		0.16		0.000145445	2.9661e-05	0.000115784		0.16		0.000122319	5.03529e-05	7.19656e-05
												0.17		8.58521e-05	1.78607e-05	6.79913e-05		0.17		4.72633e-05	1.03025e-05	3.69609e-05		0.17		7.78305e-05	7.4415e-05	3.41555e-06		0.17		0.000537336	1.41487e-06	0.000535921		0.17		0.00015752	3.32984e-05	0.000124222		0.17		0.00013476	5.86635e-05	7.60966e-05
												0.18		9.33644e-05	2.08857e-05	7.24786e-05		0.18		5.10655e-05	1.21673e-05	3.88982e-05		0.18		8.86117e-05	8.49411e-05	3.67064e-06		0.18		0.00056197	1.70674e-06	0.000560263		0.18		0.000170556	3.73411e-05	0.000133215		0.18		0.00014867	6.82341e-05	8.04356e-05
												0.19		0.000101616	2.43859e-05	7.72298e-05		0.19		5.52719e-05	1.43471e-05	4.09249e-05		0.19		0.000100774	9.68305e-05	3.94319e-06		0.19		0.00058762	2.05461e-06	0.000585565		0.19		0.000184625	4.1829e-05	0.000142796		0.19		0.000164228	7.92365e-05	8.49911e-05
												0.2		0.000110687	2.84294e-05	8.22581e-05		0.2		5.9935e-05	1.68906e-05	4.30443e-05		0.2		0.000114476	0.000110241	4.23426e-06		0.2		0.000614326	2.46832e-06	0.000611857		0.2		0.000199804	4.68054e-05	0.000152999		0.2		0.000181635	9.18629e-05	8.97721e-05
												0.21		0.00012067	3.30928e-05	8.75773e-05		0.21		6.51139e-05	1.98537e-05	4.52601e-05		0.21		0.000129892	0.000125347	4.54498e-06		0.21		0.00064213	2.95927e-06	0.000639171		0.21		0.000216175	5.23167e-05	0.000163858		0.21		0.000201115	0.000106327	9.47876e-05
												0.22		0.000131664	3.84625e-05	9.32015e-05		0.22		7.08757e-05	2.32999e-05	4.75758e-05		0.22		0.000147214	0.000142338	4.87653e-06		0.22		0.000671077	3.54061e-06	0.000667536		0.22		0.000233824	5.84134e-05	0.000175411		0.22		0.000222916	0.000122869	0.000100047
												0.23		0.000143781	4.46355e-05	9.91456e-05		0.23		7.72962e-05	2.73011e-05	4.99951e-05		0.23		0.000166652	0.000161422	5.23015e-06		0.23		0.000701215	4.22749e-06	0.000696987		0.23		0.000252844	6.51495e-05	0.000187695		0.23		0.000247311	0.000141751	0.00010556
												0.24		0.000157145	5.17204e-05	0.000105425		0.24		8.44607e-05	3.19389e-05	5.25218e-05		0.24		0.000188436	0.000182829	5.60714e-06		0.24		0.000732593	5.03731e-06	0.000727556		0.24		0.000273334	7.25833e-05	0.000200751		0.24		0.000274605	0.000163269	0.000111337
												0.25		0.000171893	5.98386e-05	0.000112055		0.25		9.24655e-05	3.73057e-05	5.51599e-05		0.25		0.000212814	0.000206805	6.00889e-06		0.25		0.000765266	5.98997e-06	0.000759276		0.25		0.000295397	8.07773e-05	0.00021462		0.25		0.000305132	0.000187746	0.000117386
												0.26		0.000188178	6.91257e-05	0.000119052		0.26		0.000101419	4.35055e-05	5.79131e-05		0.26		0.000240061	0.000233624	6.43681e-06		0.26		0.00079929	7.10824e-06	0.000792182		0.26		0.000319145	8.97984e-05	0.000229346		0.26		0.00033926	0.000215539	0.00012372
												0.27		0.000206166	7.97326e-05	0.000126434		0.27		0.000111441	5.06556e-05	6.07858e-05		0.27		0.000270471	0.000263578	6.89242e-06		0.27		0.000834725	8.41802e-06	0.000826307		0.27		0.000344693	9.97184e-05	0.000244974		0.27		0.000377393	0.000247044	0.000130348
												0.28		0.000226044	9.1827e-05	0.000134217		0.28		0.00012267	5.88879e-05	6.37819e-05		0.28		0.000304366	0.000296989	7.3773e-06		0.28		0.000871636	9.94876e-06	0.000861687		0.28		0.000372166	0.000110614	0.000261552		0.28		0.000419973	0.000282691	0.000137282
												0.29		0.000248015	0.000105595	0.00014242		0.29		0.000135256	6.835e-05	6.69059e-05		0.29		0.000342093	0.0003342	7.8931e-06		0.29		0.000910093	1.17338e-05	0.000898359		0.29		0.000401694	0.000122566	0.000279129		0.29		0.000467486	0.000322954	0.000144532
												0.3		0.000272304	0.000121242	0.000151061		0.3		0.000149369	7.92075e-05	7.01619e-05		0.3		0.000384029	0.000375587	8.44155e-06		0.3		0.000950168	1.38108e-05	0.000936357		0.3		0.000433416	0.000135662	0.000297755		0.3		0.000520459	0.00036835	0.00015211
												0.31		0.000299157	0.000138997	0.00016016		0.31		0.000165199	9.16448e-05	7.35546e-05		0.31		0.000430578	0.000421553	9.02445e-06		0.31		0.000991941	1.62222e-05	0.000975719		0.31		0.000467476	0.000149993	0.000317483		0.31		0.000579466	0.00041944	0.000160027
												0.32		0.000328844	0.000159108	0.000169736		0.32		0.000182956	0.000105868	7.70884e-05		0.32		0.000482176	0.000472532	9.64372e-06		0.32		0.0010355	1.90157e-05	0.00101648		0.32		0.000504028	0.000165658	0.00033837		0.32		0.000645131	0.000476837	0.000168294
												0.33		0.000361662	0.000181852	0.000179809		0.33		0.000202873	0.000122105	8.07679e-05		0.33		0.000539291	0.00052899	1.03013e-05		0.33		0.00108093	2.22446e-05	0.00105868		0.33		0.000543231	0.00018276	0.000360471		0.33		0.000718128	0.000541203	0.000176925
												0.34		0.000397932	0.000207531	0.000190401		0.34		0.000225209	0.000140611	8.45979e-05		0.34		0.000602425	0.000591426	1.09993e-05		0.34		0.00112833	2.59686e-05	0.00110236		0.34		0.000585254	0.000201408	0.000383846		0.34		0.000799186	0.000613255	0.000185931
												0.35		0.000438009	0.000236476	0.000201533		0.35		0.000250249	0.000161666	8.85832e-05		0.35		0.000672115	0.000660376	1.17398e-05		0.35		0.00117781	3.0254e-05	0.00114756		0.35		0.000630274	0.000221717	0.000408557		0.35		0.00088909	0.000693765	0.000195325
												0.36		0.000482273	0.000269047	0.000213226		0.36		0.00027831	0.000185581	9.27286e-05		0.36		0.000748934	0.000736409	1.25251e-05		0.36		0.00122948	3.51745e-05	0.00119431		0.36		0.000678475	0.000243808	0.000434667		0.36		0.000988682	0.000783563	0.000205119
												0.37		0.000531143	0.000305639	0.000225504		0.37		0.000309737	0.000212697	9.70392e-05		0.37		0.00083349	0.000820132	1.33576e-05		0.37		0.00128347	4.08116e-05	0.00124266		0.37		0.000730049	0.000267808	0.000462241		0.37		0.00109887	0.000883539	0.000215326
												0.38		0.000585068	0.000346678	0.00023839		0.38		0.000344911	0.000243391	0.00010152		0.38		0.000926431	0.000912191	1.42396e-05		0.38		0.00133989	4.72553e-05	0.00129263		0.38		0.000785198	0.000293851	0.000491347		0.38		0.00122061	0.000994646	0.000225958
												0.39		0.000644535	0.000392629	0.000251906		0.39		0.000384252	0.000278076	0.000106176		0.39		0.00102845	0.00101327	1.51738e-05		0.39		0.00139889	5.46044e-05	0.00134429		0.39		0.000844131	0.000322075	0.000522056		0.39		0.00135493	0.0011179	0.00023703
												0.4		0.000710073	0.000443995	0.000266078		0.4		0.000428214	0.000317201	0.000111013		0.4		0.00114026	0.00112409	1.61627e-05		0.4		0.00146063	6.29675e-05	0.00139766		0.4		0.000907064	0.000352626	0.000554438		0.4		0.00150292	0.00125437	0.000248554
												0.41		0.000782245	0.000501315	0.00028093		0.41		0.000477296	0.000361261	0.000116035		0.41		0.00126263	0.00124542	1.7209e-05		0.41		0.00152525	7.24629e-05	0.00145278		0.41		0.000974224	0.000385654	0.00058857		0.41		0.00166575	0.0014052	0.000260544
												0.42		0.000861662	0.000565174	0.000296487		0.42		0.000532041	0.000410793	0.000121249		0.42		0.00139637	0.00137806	1.83157e-05		0.42		0.00159293	8.32196e-05	0.00150971		0.42		0.00104584	0.000421317	0.000624527		0.42		0.00184462	0.00157161	0.000273014
												0.43		0.000948974	0.000636198	0.000312776		0.43		0.000593037	0.000466378	0.000126659		0.43		0.00154233	0.00152285	1.94857e-05		0.43		0.00166385	9.53776e-05	0.00156847		0.43		0.00112217	0.000459777	0.000662388		0.43		0.00204082	0.00175484	0.000285976
												0.44		0.00104488	0.000715057	0.000329821		0.44		0.000660921	0.00052865	0.000132271		0.44		0.00170139	0.00168067	2.07221e-05		0.44		0.0017382	0.000109088	0.00162911		0.44		0.00120344	0.000501201	0.000702234		0.44		0.00225569	0.00195625	0.000299445
												0.45		0.00115012	0.000802467	0.000347651		0.45		0.000736382	0.000598291	0.000138091		0.45		0.00187447	0.00185244	2.2028e-05		0.45		0.0018162	0.000124515	0.00169168		0.45		0.00128991	0.000545762	0.000744149		0.45		0.00249064	0.00217721	0.000313435
												0.46		0.00126548	0.000899192	0.000366291		0.46		0.000820163	0.000676039	0.000144124		0.46		0.00206254	0.00203913	2.34067e-05		0.46		0.00189804	0.000141832	0.00175621		0.46		0.00138186	0.000593639	0.000788217		0.46		0.00274712	0.00241917	0.000327959
												0.47		0.00139181	0.00100604	0.00038577		0.47		0.000913061	0.000762685	0.000150376		0.47		0.00226659	0.00224172	2.48617e-05		0.47		0.00198398	0.000161227	0.00182275		0.47		0.00147954	0.000645013	0.000834527		0.47		0.00302666	0.00268363	0.000343032
												0.48		0.00152999	0.00112387	0.000406115		0.48		0.00101593	0.000859079	0.000156852		0.48		0.00248765	0.00246126	2.63965e-05		0.48		0.00207424	0.000182899	0.00189134		0.48		0.00158324	0.000700069	0.000883167		0.48		0.00333081	0.00297214	0.000358668
												0.49		0.00168095	0.0012536	0.000427355		0.49		0.00112969	0.00096613	0.000163559		0.49		0.0027268	0.00269879	2.80147e-05		0.49		0.00216908	0.000207061	0.00196202		0.49		0.00169323	0.000758998	0.000934229		0.49		0.00366118	0.0032863	0.00037488
												0.5		0.00184568	0.00139616	0.000449519		0.5		0.00125531	0.00108481	0.000170502		0.5		0.00298513	0.00295541	2.972e-05		0.5		0.00226877	0.000233934	0.00203483		0.5		0.0018098	0.000821991	0.000987808		0.5		0.00401941	0.00362773	0.000391684
												0.51		0.00202521	0.00155258	0.000472634		0.51		0.00139383	0.00121614	0.000177686		0.51		0.00326376	0.00323224	3.15165e-05		0.51		0.00237358	0.000263755	0.00210982		0.51		0.00193324	0.000889244	0.001044		0.51		0.00440719	0.0039981	0.000409092
												0.52		0.00222061	0.00172388	0.000496731		0.52		0.00154634	0.00136122	0.000185119		0.52		0.00356384	0.00353043	3.3408e-05		0.52		0.0024838	0.000296769	0.00218703		0.52		0.00206385	0.000960951	0.0011029		0.52		0.0048262	0.00439908	0.000427118
												0.53		0.00243302	0.00191118	0.000521839		0.53		0.00171402	0.00152121	0.000192805		0.53		0.00388653	0.00385114	3.53987e-05		0.53		0.00259973	0.000333233	0.00226649		0.53		0.00220192	0.00103731	0.00116461		0.53		0.00527816	0.00483238	0.000445778
												0.54		0.00266358	0.0021156	0.000547987		0.54		0.00189807	0.00169732	0.00020075		0.54		0.00423302	0.00419553	3.74929e-05		0.54		0.00272167	0.000373411	0.00234826		0.54		0.00234774	0.00111852	0.00122922		0.54		0.00576478	0.0052997	0.000465083
												0.55		0.00291352	0.00233832	0.000575205		0.55		0.0020998	0.00189084	0.000208961		0.55		0.0046045	0.00456481	3.96949e-05		0.55		0.00284995	0.000417578	0.00243237		0.55		0.00250163	0.00120477	0.00129685		0.55		0.00628776	0.00580271	0.000485049
												0.56		0.00318407	0.00258055	0.000603524		0.56		0.00232053	0.00210309	0.000217442		0.56		0.00500216	0.00496015	4.20093e-05		0.56		0.00298488	0.000466014	0.00251887		0.56		0.00266386	0.00129626	0.0013676		0.56		0.00684879	0.0063431	0.000505689
												0.57		0.00347651	0.00284354	0.000632972		0.57		0.00256168	0.00233548	0.000226201		0.57		0.0054272	0.00538276	4.44407e-05		0.57		0.0031268	0.000519004	0.00260779		0.57		0.00283476	0.00139318	0.00144157		0.57		0.00744952	0.0069225	0.000527016
												0.58		0.00379214	0.00312856	0.000663581		0.58		0.0028247	0.00258946	0.000235242		0.58		0.0058808	0.00583381	4.69937e-05		0.58		0.00327602	0.000576838	0.00269918		0.58		0.00301459	0.00149572	0.00151887		0.58		0.00809153	0.00754248	0.000549043
												0.59		0.00413228	0.00343691	0.00069538		0.59		0.0031111	0.00286653	0.000244573		0.59		0.00636414	0.00631446	4.96734e-05		0.59		0.00343288	0.000639804	0.00279307		0.59		0.00320367	0.00160406	0.00159961		0.59		0.00877636	0.00820458	0.000571783
												0.6		0.0044983	0.0037699	0.000728398		0.6		0.00342244	0.00316824	0.000254197		0.6		0.00687836	0.00682587	5.24846e-05		0.6		0.0035977	0.000708193	0.00288951		0.6		0.00340227	0.00171837	0.0016839		0.6		0.00950548	0.00891023	0.000595249
												0.61		0.00489152	0.00412886	0.000762666		0.61		0.00376031	0.00349618	0.000264122		0.61		0.00742457	0.00736914	5.54326e-05		0.61		0.00377082	0.000782288	0.00298853		0.61		0.00361066	0.00183882	0.00177184		0.61		0.0102802	0.00966077	0.000619453
												0.62		0.00531332	0.00451511	0.000798213		0.62		0.00412634	0.00385199	0.000274353		0.62		0.00800387	0.00794535	5.85224e-05		0.62		0.00395255	0.000862368	0.00309018		0.62		0.00382913	0.00196557	0.00186356		0.62		0.0111018	0.0104574	0.000644408
												0.63		0.00576505	0.00492998	0.000835068		0.63		0.0045222	0.00423731	0.000284895		0.63		0.00861728	0.00855552	6.17595e-05		0.63		0.00414319	0.000948701	0.00319448		0.63		0.00405794	0.00209878	0.00195916		0.63		0.0119714	0.0113013	0.000670126
												0.64		0.00624804	0.00537478	0.000873261		0.64		0.00494958	0.00465382	0.000295755		0.64		0.00926577	0.00920062	6.51494e-05		0.64		0.00434303	0.00104154	0.00330149		0.64		0.00429732	0.00223857	0.00205875		0.64		0.01289	0.0121934	0.000696616
												0.65		0.00676361	0.00585079	0.00091282		0.65		0.00541015	0.00510322	0.000306937		0.65		0.00995024	0.00988154	6.86975e-05		0.65		0.00455236	0.00114113	0.00341122		0.65		0.00454753	0.00238507	0.00216245		0.65		0.0138582	0.0131343	0.000723892
												0.66		0.00731303	0.00635926	0.000953773		0.66		0.00590563	0.00558718	0.000318447		0.66		0.0106715	0.0105991	7.24096e-05		0.66		0.00477141	0.00124768	0.00352373		0.66		0.00480877	0.0025384	0.00227037		0.66		0.0148768	0.0141248	0.000751963
												0.67		0.00789754	0.0069014	0.000996147		0.67		0.00643768	0.00610739	0.000330291		0.67		0.0114304	0.0113541	7.62914e-05		0.67		0.00500043	0.0013614	0.00363904		0.67		0.00508127	0.00269864	0.00238263		0.67		0.015946	0.0151652	0.000780839
												0.68		0.00851832	0.00747835	0.00103997		0.68		0.00700798	0.00666551	0.000342473		0.68		0.0122274	0.0121471	8.03489e-05		0.68		0.00523961	0.00148243	0.00375718		0.68		0.0053652	0.00286587	0.00249933		0.68		0.0170662	0.0162556	0.000810529
												0.69		0.00917647	0.0080912	0.00108527		0.69		0.00761816	0.00726316	0.000354999		0.69		0.0130632	0.0129786	8.45879e-05		0.69		0.00548912	0.00161093	0.00387819		0.69		0.00566074	0.00304015	0.00262059		0.69		0.0182371	0.0173961	0.000841044
												0.7		0.00987301	0.00874094	0.00113207		0.7		0.00826978	0.00790191	0.000367873		0.7		0.0139381	0.0138491	8.90146e-05		0.7		0.00574909	0.00174698	0.0040021		0.7		0.00596804	0.00322152	0.00274652		0.7		0.0194585	0.0185861	0.000872391
												0.71		0.0106089	0.00942849	0.00118039		0.71		0.00896438	0.00858328	0.000381102		0.71		0.0148525	0.0147589	9.36351e-05		0.71		0.0060196	0.00189065	0.00412894		0.71		0.00628723	0.00340999	0.00287724		0.71		0.0207297	0.0198251	0.000904578
												0.72		0.0113849	0.0101546	0.00123026		0.72		0.00970338	0.00930869	0.000394688		0.72		0.0158065	0.0157081	9.84556e-05		0.72		0.0063007	0.00204195	0.00425874		0.72		0.0066184	0.00360557	0.00301284		0.72		0.0220498	0.0211122	0.000937613
												0.73		0.0122018	0.0109201	0.00128171		0.73		0.0104881	0.0100795	0.000408637		0.73		0.0168001	0.0166966	0.000103483		0.73		0.00659238	0.00220085	0.00439152		0.73		0.00696164	0.0038082	0.00315344		0.73		0.0234176	0.0224461	0.000971502
												0.74		0.0130601	0.0117253	0.00133475		0.74		0.0113199	0.0108969	0.000422954		0.74		0.0178331	0.0177244	0.000108722		0.74		0.00689458	0.00236726	0.00452732		0.74		0.00731699	0.00401785	0.00329914		0.74		0.0248316	0.0238254	0.00100625
												0.75		0.0139601	0.0125708	0.00138941		0.75		0.0121997	0.011762	0.000437642		0.75		0.0189052	0.0187911	0.000114181		0.75		0.00720719	0.00254105	0.00466615		0.75		0.00768448	0.00423442	0.00345006		0.75		0.02629	0.0252481	0.00104186
												0.76		0.0149023	0.0134566	0.0014457		0.76		0.0131285	0.0126758	0.000452706		0.76		0.020016	0.0198962	0.000119865		0.76		0.00753004	0.00272201	0.00480803		0.76		0.00806409	0.00445781	0.00360628		0.76		0.0277905	0.0267121	0.00107835
												0.77		0.0158867	0.014383	0.00150364		0.77		0.0141072	0.013639	0.000468148		0.77		0.0211647	0.0210389	0.000125782		0.77		0.00786289	0.0029099	0.004953		0.77		0.00845579	0.00468788	0.00376792		0.77		0.0293306	0.0282149	0.0011157
												0.78		0.0169131	0.0153498	0.00156326		0.78		0.0151363	0.0146523	0.000483974		0.78		0.0223505	0.0222186	0.000131937		0.78		0.00820545	0.00310439	0.00510106		0.78		0.00885951	0.00492445	0.00393506		0.78		0.0309075	0.0297536	0.00115393
												0.79		0.0179812	0.0163566	0.00162456		0.79		0.0162162	0.015716	0.000500185		0.79		0.0235723	0.0234339	0.000138337		0.79		0.00855735	0.00330511	0.00525224		0.79		0.00927513	0.00516733	0.0041078		0.79		0.032518	0.0313249	0.00119304
												0.8		0.0190905	0.0174029	0.00168756		0.8		0.0173472	0.0168304	0.000516787		0.8		0.0248288	0.0246838	0.000144989		0.8		0.00891816	0.00351161	0.00540655		0.8		0.00970251	0.00541629	0.00428623		0.8		0.0341584	0.0329254	0.00123303
												0.81		0.0202403	0.018488	0.00175227		0.81		0.0185291	0.0179954	0.00053378		0.81		0.0261185	0.0259666	0.0001519		0.81		0.00928739	0.00372338	0.00556401		0.81		0.0101415	0.00567106	0.00447043		0.81		0.0358251	0.0345512	0.00127389
												0.82		0.0214295	0.0196108	0.0018187		0.82		0.0197618	0.0192106	0.000551168		0.82		0.0274398	0.0272807	0.000159076		0.82		0.00966447	0.00393985	0.00572462		0.82		0.0105918	0.00593135	0.0046605		0.82		0.0375137	0.0361981	0.00131563
												0.83		0.022657	0.0207702	0.00188686		0.83		0.0210445	0.0204755	0.000568953		0.83		0.0287908	0.0286243	0.000166524		0.83		0.0100488	0.00416037	0.00588841		0.83		0.0110533	0.00619683	0.0048565		0.83		0.0392198	0.0378615	0.00135825
												0.84		0.0239213	0.0219645	0.00195677		0.84		0.0223765	0.0217894	0.000587138		0.84		0.0301693	0.0299951	0.000174249		0.84		0.0104396	0.00438426	0.00605536		0.84		0.0115257	0.00646715	0.00505851		0.84		0.0409385	0.0395368	0.00140174
												0.85		0.0252207	0.0231923	0.00202841		0.85		0.0237567	0.023151	0.000605724		0.85		0.0315731	0.0313908	0.00018226		0.85		0.0108362	0.00461074	0.0062255		0.85		0.0120085	0.00674191	0.0052666		0.85		0.0426649	0.0412188	0.0014461
												0.86		0.0265531	0.0244513	0.00210181		0.86		0.0251835	0.0245588	0.000624712		0.86		0.0329995	0.032809	0.000190562		0.86		0.0112378	0.004839	0.00639883		0.86		0.0125015	0.0070207	0.00548082		0.86		0.0443935	0.0429021	0.00149132
												0.87		0.0279164	0.0257395	0.00217695		0.87		0.0266553	0.0260112	0.000644104		0.87		0.034446	0.0342468	0.000199161		0.87		0.0116435	0.00506817	0.00657533		0.87		0.0130043	0.00730305	0.00570125		0.87		0.0461188	0.0445814	0.00153739
												0.88		0.0293081	0.0270542	0.00225383		0.88		0.0281699	0.027506	0.000663901		0.88		0.0359094	0.0357013	0.000208064		0.88		0.0120524	0.00529734	0.00675503		0.88		0.0135164	0.00758849	0.00592792		0.88		0.047835	0.0462507	0.00158432
												0.89		0.0307253	0.0283929	0.00233246		0.89		0.0297249	0.0290408	0.000684102		0.89		0.0373867	0.0371694	0.000217278		0.89		0.0124634	0.00552555	0.0069379		0.89		0.0140374	0.0078765	0.00616088		0.89		0.0495363	0.0479042	0.00163208
												0.9		0.0321652	0.0297524	0.00241283		0.9		0.0313177	0.0306129	0.000704709		0.9		0.0388746	0.0386478	0.000226808		0.9		0.0128758	0.0057518	0.00712394		0.9		0.0145667	0.00816654	0.00640017		0.9		0.0512165	0.0495359	0.00168068
												0.91		0.0336245	0.0311296	0.00249492		0.91		0.032945	0.0322193	0.00072572		0.91		0.0403696	0.040133	0.00023666		0.91		0.0132882	0.00597507	0.00731316		0.91		0.0151039	0.00845805	0.00664581		0.91		0.0528695	0.0511394	0.00173009
												0.92		0.0350996	0.0325209	0.00257873		0.92		0.0346036	0.0338564	0.000747136		0.92		0.041868	0.0416212	0.00024684		0.92		0.0136998	0.00619431	0.00750552		0.92		0.0156483	0.00875042	0.00689784		0.92		0.0544891	0.0527087	0.00178031
												0.93		0.0365869	0.0339227	0.00266424		0.93		0.0362896	0.0355206	0.000768955		0.93		0.0433661	0.0431087	0.000257354		0.93		0.0141095	0.00640846	0.00770102		0.93		0.0161993	0.00904305	0.00715627		0.93		0.0560689	0.0542375	0.00183133
												0.94		0.0380824	0.035331	0.00275144		0.94		0.0379991	0.0372079	0.000791176		0.94		0.0448598	0.0445916	0.000268208		0.94		0.0145161	0.00661645	0.00789965		0.94		0.0167564	0.00933529	0.0074211		0.94		0.0576027	0.0557195	0.00188312
												0.95		0.0395821	0.0367418	0.00284031		0.95		0.0397276	0.0389138	0.000813797		0.95		0.0463452	0.0460658	0.000279406		0.95		0.0149186	0.00681722	0.00810137		0.95		0.0173188	0.00962648	0.00769234		0.95		0.0590843	0.0571486	0.00193568
												0.96		0.0410816	0.0381507	0.00293083		0.96		0.0414706	0.0406337	0.000836815		0.96		0.047818	0.0475271	0.000290954		0.96		0.0153159	0.00700972	0.00830618		0.96		0.0178859	0.00991595	0.00796997		0.96		0.0605076	0.0585186	0.00198898
												0.97		0.0425764	0.0395534	0.00302297		0.97		0.043223	0.0423628	0.000860229		0.97		0.049274	0.0489712	0.000302857		0.97		0.015707	0.00719291	0.00851404		0.97		0.018457	0.010203	0.00825397		0.97		0.0618667	0.0598237	0.00204301
												0.98		0.0440619	0.0409452	0.00311671		0.98		0.0449798	0.0440957	0.000884036		0.98		0.050709	0.0503938	0.00031512		0.98		0.0160907	0.00736579	0.00872493		0.98		0.0190312	0.0104869	0.00854432		0.98		0.0631557	0.061058	0.00209774
												0.99		0.0455335	0.0423215	0.00321201		0.99		0.0467354	0.0458272	0.000908231		0.99		0.0521184	0.0517907	0.000327747		0.99		0.0164662	0.0075274	0.00893881		0.99		0.019608	0.010767	0.00884098		0.99		0.0643692	0.062216	0.00215316
												1		0.0469863	0.0436774	0.00330884		1		0.0484843	0.0475515	0.000932811		1		0.053498	0.0531573	0.000340742		1		0.0168325	0.00767682	0.00915564		1		0.0201865	0.0110426	0.0091439		1		0.0655018	0.0632926	0.00220925
												1.01		0.0484154	0.0450082	0.00340718		1.01		0.0502206	0.0492629	0.000957771		1.01		0.0548435	0.0544893	0.000354109		1.01		0.0171886	0.00781319	0.0093754		1.01		0.0207659	0.0113128	0.00945303		1.01		0.0665486	0.0642826	0.00226597
												1.02		0.0498159	0.0463089	0.00350697		1.02		0.0519385	0.0509554	0.000983106		1.02		0.0561503	0.0557824	0.000367851		1.02		0.0175338	0.00793572	0.00959804		1.02		0.0213454	0.0115771	0.00976829		1.02		0.0675049	0.0651815	0.00232331
												1.03		0.0511828	0.0475746	0.00360818		1.03		0.0536317	0.0526228	0.00100881		1.03		0.0574142	0.0570322	0.000381973		1.03		0.0178672	0.00804368	0.00982352		1.03		0.0219243	0.0118347	0.0100896		1.03		0.0683664	0.0659852	0.00238123
												1.04		0.0525113	0.0488006	0.00371077		1.04		0.0552941	0.0542592	0.00103488		1.04		0.058631	0.0582346	0.000396476		1.04		0.0181882	0.00813644	0.0100518		1.04		0.0225017	0.0120848	0.0104169		1.04		0.0691294	0.0666896	0.00243971
												1.05		0.0537966	0.0499819	0.00381468		1.05		0.0569195	0.0558582	0.00106131		1.05		0.0597966	0.0593852	0.000411364		1.05		0.0184962	0.00821343	0.0102828		1.05		0.0230768	0.0123267	0.0107501		1.05		0.0697903	0.0672916	0.00249872
												1.06		0.0550338	0.0511139	0.00391986		1.06		0.0585017	0.0574136	0.00108809		1.06		0.0609069	0.0604802	0.000426638		1.06		0.0187907	0.0082742	0.0105165		1.06		0.0236488	0.0125598	0.011089		1.06		0.0703464	0.0677882	0.00255823
												1.07		0.0562182	0.052192	0.00402626		1.07		0.0600345	0.0589193	0.00111521		1.07		0.0619579	0.0615156	0.000442301		1.07		0.0190712	0.00831836	0.0107528		1.07		0.024217	0.0127834	0.0114335		1.07		0.0707951	0.0681769	0.00261821
												1.08		0.0573454	0.0532116	0.00413383		1.08		0.0615117	0.060369	0.00114267		1.08		0.0629461	0.0624877	0.000458353		1.08		0.0193373	0.00834566	0.0109917		1.08		0.0247804	0.0129968	0.0117836		1.08		0.0711346	0.068456	0.00267863
												1.09		0.0584111	0.0541686	0.00424249		1.09		0.0629274	0.0617569	0.00117046		1.09		0.0638678	0.063393	0.000474796		1.09		0.019589	0.00835591	0.0112331		1.09		0.0253384	0.0131994	0.012139		1.09		0.0713634	0.0686239	0.00273944
												1.1		0.0594111	0.0550589	0.0043522		1.1		0.0642757	0.0630771	0.00119857		1.1		0.0647198	0.0642281	0.00049163		1.1		0.019826	0.00834907	0.0114769		1.1		0.0258902	0.0133906	0.0124996		1.1		0.0714806	0.06868	0.00280062
												1.11		0.0603415	0.0558786	0.00446289		1.11		0.0655508	0.0643239	0.00122699		1.11		0.0654988	0.06499	0.000508856		1.11		0.0200483	0.00832518	0.0117231		1.11		0.0264349	0.0135697	0.0128652		1.11		0.071486	0.0686239	0.00286213
												1.12		0.0611986	0.0566241	0.00457448		1.12		0.0667475	0.0654918	0.0012557		1.12		0.0662022	0.0656757	0.000526472		1.12		0.020256	0.00828437	0.0119716		1.12		0.026972	0.0137363	0.0132357		1.12		0.0713799	0.068456	0.00292392
												1.13		0.0619792	0.0572923	0.00468691		1.13		0.0678605	0.0665758	0.00128471		1.13		0.0668272	0.0662827	0.000544477		1.13		0.0204492	0.0082269	0.0122223		1.13		0.0275006	0.0138897	0.0136109		1.13		0.0711629	0.0681769	0.00298597
												1.14		0.0626802	0.0578801	0.00480009		1.14		0.068885	0.067571	0.001314		1.14		0.0673716	0.0668087	0.000562871		1.14		0.0206283	0.00815312	0.0124752		1.14		0.0280201	0.0140296	0.0139905		1.14		0.0708364	0.0677882	0.00304823
												1.15		0.0632989	0.0583849	0.00491396		1.15		0.0698164	0.0684729	0.00134355		1.15		0.0678333	0.0672517	0.000581651		1.15		0.0207936	0.00806347	0.0127301		1.15		0.0285298	0.0141555	0.0143743		1.15		0.0704023	0.0672916	0.00311066
												1.16		0.0638329	0.0588045	0.00502843		1.16		0.0706507	0.0692774	0.00137336		1.16		0.0682107	0.0676099	0.000600815		1.16		0.0209455	0.0079585	0.012987		1.16		0.0290291	0.0142669	0.0147622		1.16		0.0698629	0.0666896	0.00317322
												1.17		0.0642803	0.0591369	0.00514342		1.17		0.0713842	0.0699808	0.00140342		1.17		0.0685024	0.067882	0.00062036		1.17		0.0210846	0.00783882	0.0132457		1.17		0.0295174	0.0143636	0.0151538		1.17		0.069221	0.0659852	0.00323586
												1.18		0.0646395	0.0593807	0.00525885		1.18		0.0720135	0.0705798	0.0014337		1.18		0.0687073	0.068067	0.000640281		1.18		0.0212114	0.00770516	0.0135063		1.18		0.0299941	0.0144452	0.015549		1.18		0.0684801	0.0651815	0.00329854
												1.19		0.0649093	0.0595347	0.00537463		1.19		0.0725359	0.0710717	0.00146421		1.19		0.0688247	0.0681641	0.000660575		1.19		0.0213268	0.00755828	0.0137685		1.19		0.0304588	0.0145114	0.0159474		1.19		0.0676438	0.0642826	0.00336121
												1.2		0.0650889	0.0595982	0.00549066		1.2		0.0729491	0.0714541	0.00149492		1.2		0.0688542	0.0681729	0.000681237		1.2		0.0214314	0.00739904	0.0140323		1.2		0.0309108	0.0145621	0.0163487		1.2		0.0667164	0.0632926	0.00342384
												1.21		0.0651778	0.0595709	0.00560686		1.21		0.0732512	0.0717253	0.00152582		1.21		0.0687957	0.0680935	0.000702261		1.21		0.021526	0.00722834	0.0142977		1.21		0.0313499	0.014597	0.0167529		1.21		0.0657024	0.062216	0.00348636
												1.22		0.0651762	0.0594531	0.00572313		1.22		0.0734409	0.071884	0.00155689		1.22		0.0686497	0.067926	0.000723642		1.22		0.0216115	0.00704713	0.0145644		1.22		0.0317755	0.0146161	0.0171594		1.22		0.0646067	0.061058	0.00354874
												1.23		0.0650845	0.0592451	0.00583937		1.23		0.0735176	0.0719294	0.00158813		1.23		0.0684166	0.0676713	0.000745372		1.23		0.0216887	0.00685642	0.0148323		1.23		0.0321873	0.0146193	0.017568		1.23		0.0634346	0.0598237	0.00361093
												1.24		0.0649035	0.058948	0.00595549		1.24		0.0734809	0.0718613	0.00161951		1.24		0.0680976	0.0673301	0.000767445		1.24		0.0217587	0.00665722	0.0151015		1.24		0.032585	0.0146065	0.0179784		1.24		0.0621915	0.0585186	0.00367288
												1.25		0.0646345	0.0585631	0.00607139		1.25		0.0733311	0.0716801	0.00165102		1.25		0.0676938	0.066904	0.000789852		1.25		0.0218222	0.00645058	0.0153717		1.25		0.0329682	0.0145779	0.0183903		1.25		0.0608831	0.0571486	0.00373453
												1.26		0.0642791	0.0580921	0.00618696		1.26		0.0730692	0.0713865	0.00168264		1.26		0.067207	0.0663944	0.000812584		1.26		0.0218803	0.00623758	0.0156428		1.26		0.0333368	0.0145335	0.0188033		1.26		0.0595154	0.0557195	0.00379584
												1.27		0.0638393	0.0575372	0.0063021		1.27		0.0726964	0.070982	0.00171436		1.27		0.0666391	0.0658035	0.000835633		1.27		0.021934	0.00601927	0.0159147		1.27		0.0336906	0.0144735	0.0192171		1.27		0.0580943	0.0542375	0.00385676
												1.28		0.0633176	0.0569009	0.0064167		1.28		0.0722146	0.0704685	0.00174616		1.28		0.0659923	0.0651333	0.000858988		1.28		0.021984	0.00579673	0.0161873		1.28		0.0340293	0.014398	0.0196313		1.28		0.056626	0.0527087	0.00391724
												1.29		0.0627166	0.0561859	0.00653067		1.29		0.0716263	0.0698483	0.00177801		1.29		0.0652691	0.0643864	0.00088264		1.29		0.0220315	0.00557099	0.0164605		1.29		0.034353	0.0143074	0.0200456		1.29		0.0551167	0.0511394	0.00397722
												1.3		0.0620393	0.0553954	0.00664389		1.3		0.0709344	0.0691244	0.00180991		1.3		0.0644723	0.0635658	0.000906576		1.3		0.0220772	0.00534309	0.0167341		1.3		0.0346614	0.0142018	0.0204596		1.3		0.0535725	0.0495359	0.00403665
												1.31		0.0612892	0.054533	0.00675625		1.31		0.070142	0.0683002	0.00184184		1.31		0.063605	0.0626743	0.000930785		1.31		0.0221221	0.00511404	0.0170081		1.31		0.0349546	0.0140816	0.020873		1.31		0.0519997	0.0479042	0.00409549
												1.32		0.0604698	0.0536022	0.00686764		1.32		0.069253	0.0673793	0.00187377		1.32		0.0626705	0.0617152	0.000955254		1.32		0.0221669	0.00488479	0.0172821		1.32		0.0352326	0.0139473	0.0212853		1.32		0.0504044	0.0462507	0.00415368
												1.33		0.059585	0.0526071	0.00697796		1.33		0.0682716	0.066366	0.00190569		1.33		0.0616722	0.0606922	0.00097997		1.33		0.0222126	0.00465627	0.0175563		1.33		0.0354954	0.0137992	0.0216961		1.33		0.0487925	0.0445814	0.00421117
												1.34		0.058639	0.0515519	0.00708709		1.34		0.0672023	0.0652648	0.00193757		1.34		0.0606137	0.0596088	0.00100492		1.34		0.0222597	0.00442937	0.0178303		1.34		0.035743	0.0136378	0.0221052		1.34		0.04717	0.0429021	0.0042679
												1.35		0.0576358	0.0504409	0.00719493		1.35		0.06605	0.0640806	0.00196941		1.35		0.0594991	0.058469	0.00103009		1.35		0.022309	0.0042049	0.0181041		1.35		0.0359756	0.0134637	0.0225119		1.35		0.0455426	0.0412188	0.00432383
												1.36		0.0565801	0.0492787	0.00730137		1.36		0.0648199	0.0628188	0.00200117		1.36		0.0583321	0.0572766	0.00105546		1.36		0.0223612	0.00398365	0.0183775		1.36		0.0361934	0.0132773	0.0229161		1.36		0.0439157	0.0395368	0.00437891
												1.37		0.0554764	0.0480701	0.00740629		1.37		0.0635174	0.0614846	0.00203284		1.37		0.057117	0.056036	0.00108102		1.37		0.0224168	0.00376632	0.0186504		1.37		0.0363964	0.0130792	0.0233172		1.37		0.0422946	0.0378615	0.00443308
												1.38		0.0543292	0.0468196	0.00750958		1.38		0.0621482	0.0600839	0.00206439		1.38		0.055858	0.0547512	0.00110675		1.38		0.0224762	0.00355356	0.0189227		1.38		0.0365849	0.01287	0.0237149		1.38		0.0406844	0.0361981	0.00448629
												1.39		0.0531435	0.0455323	0.00761113		1.39		0.0607182	0.0586224	0.00209581		1.39		0.0545592	0.0534266	0.00113264		1.39		0.02254	0.00334596	0.0191941		1.39		0.0367592	0.0126505	0.0241087		1.39		0.0390897	0.0345512	0.0045385
												1.4		0.0519239	0.044213	0.00771085		1.4		0.0592334	0.0571063	0.00212708		1.4		0.0532252	0.0520666	0.00115866		1.4		0.0226086	0.00314405	0.0194645		1.4		0.0369193	0.0124211	0.0244982		1.4		0.0375151	0.0329254	0.00458964
												1.41		0.0506752	0.0428666	0.00780861		1.41		0.0576999	0.0555417	0.00215817		1.41		0.0518602	0.0506754	0.0011848		1.41		0.0226822	0.00294828	0.0197339		1.41		0.0370656	0.0121826	0.0248831		1.41		0.0359646	0.0313249	0.00463968
												1.42		0.0494022	0.0414979	0.00790431		1.42		0.0561238	0.0539347	0.00218907		1.42		0.0504686	0.0492576	0.00121104		1.42		0.022761	0.00275904	0.020002		1.42		0.0371984	0.0119356	0.0252628		1.42		0.0344421	0.0297536	0.00468857
												1.43		0.0481096	0.0401117	0.00799785		1.43		0.0545114	0.0522917	0.00221975		1.43		0.0490548	0.0478174	0.00123737		1.43		0.0228453	0.00257667	0.0202686		1.43		0.037318	0.011681	0.025637		1.43		0.0329512	0.0282149	0.00473625
												1.44		0.0468019	0.0387128	0.00808912		1.44		0.0528689	0.0506187	0.00225018		1.44		0.0476229	0.0463592	0.00126375		1.44		0.0229351	0.00240143	0.0205337		1.44		0.0374245	0.0114193	0.0260052		1.44		0.0314948	0.0267121	0.00478268
												1.45		0.0454838	0.0373058	0.00817802		1.45		0.0512023	0.0489219	0.00228036		1.45		0.0461775	0.0448873	0.00129018		1.45		0.0230306	0.00223354	0.0207971		1.45		0.0375185	0.0111514	0.0263671		1.45		0.0300759	0.0252481	0.00482782
												1.46		0.0441597	0.0358952	0.00826444		1.46		0.0495177	0.0472075	0.00231026		1.46		0.0447224	0.0434058	0.00131662		1.46		0.0231317	0.00207313	0.0210586		1.46		0.0376001	0.0108778	0.0267222		1.46		0.028697	0.0238254	0.00487162
												1.47		0.0428337	0.0344854	0.0083483		1.47		0.0478211	0.0454813	0.00233985		1.47		0.043262	0.0419189	0.00134307		1.47		0.0232384	0.0019203	0.0213181		1.47		0.0376697	0.0105995	0.0270702		1.47		0.0273601	0.0224461	0.00491403
												1.48		0.04151	0.0330806	0.00842949		1.48		0.0461182	0.0437491	0.00236911		1.48		0.0418	0.0404305	0.00136949		1.48		0.0233505	0.00177511	0.0215754		1.48		0.0377275	0.010317	0.0274106		1.48		0.0260672	0.0211122	0.00495501
												1.49		0.0401925	0.0316846	0.00850792		1.49		0.0444145	0.0420165	0.00239803		1.49		0.0403403	0.0389444	0.00139587		1.49		0.0234678	0.00163753	0.0218303		1.49		0.0377741	0.0100311	0.027743		1.49		0.0248196	0.0198251	0.00499452
												1.5		0.0388848	0.0303014	0.0085835		1.5		0.0427155	0.0402889	0.00242658		1.5		0.0388866	0.0374644	0.00142218		1.5		0.0235903	0.00150753	0.0220828		1.5		0.0378095	0.00974251	0.028067		1.5		0.0236186	0.0185861	0.00503252
												1.51		0.0375905	0.0289344	0.00865614		1.51		0.0410261	0.0385713	0.00245474		1.51		0.0374424	0.035994	0.0014484		1.51		0.0237176	0.00138501	0.0223325		1.51		0.0378342	0.00945193	0.0283823		1.51		0.022465	0.0173961	0.00506897
												1.52		0.0363127	0.027587	0.00872575		1.52		0.0393513	0.0368688	0.00248249		1.52		0.036011	0.0345365	0.00147451		1.52		0.0238494	0.00126985	0.0225795		1.52		0.0378485	0.00916003	0.0286885		1.52		0.0213595	0.0162556	0.00510384
												1.53		0.0350546	0.0262623	0.00879225		1.53		0.0376956	0.0351858	0.00250981		1.53		0.0345955	0.0330951	0.00150048		1.53		0.0239854	0.00116188	0.0228236		1.53		0.0378526	0.00886748	0.0289851		1.53		0.0203023	0.0151652	0.00513708
												1.54		0.0338188	0.0249632	0.00885557		1.54		0.0360634	0.0335267	0.00253667		1.54		0.0331991	0.0316727	0.00152629		1.54		0.0241254	0.00106091	0.0230645		1.54		0.0378469	0.00857493	0.0292719		1.54		0.0192935	0.0141248	0.00516866
												1.55		0.0326079	0.0236922	0.00891562		1.55		0.0344585	0.0318954	0.00256305		1.55		0.0318242	0.0302723	0.00155192		1.55		0.0242689	0.000966741	0.0233021		1.55		0.0378315	0.008283	0.0295485		1.55		0.0183329	0.0131343	0.00519855
												1.56		0.0314241	0.0224517	0.00897233		1.56		0.0328846	0.0302957	0.00258895		1.56		0.0304737	0.0288963	0.00157735		1.56		0.0244155	0.000879126	0.0235364		1.56		0.0378069	0.0079923	0.0298146		1.56		0.0174201	0.0121934	0.00522672
												1.57		0.0302694	0.0212438	0.00902564		1.57		0.0313451	0.0287308	0.00261432		1.57		0.0291497	0.0275472	0.00160254		1.57		0.0245648	0.000797817	0.023767		1.57		0.0377731	0.00770341	0.0300697		1.57		0.0165544	0.0113013	0.00525314
												1.58		0.0291457	0.0200703	0.00907548		1.58		0.0298429	0.0272037	0.00263916		1.58		0.0278545	0.026227	0.00162747		1.58		0.0247165	0.000722546	0.0239939		1.58		0.0377306	0.00741688	0.0303137		1.58		0.0157352	0.0104574	0.00527777
												1.59		0.0280545	0.0189327	0.00912179		1.59		0.0283807	0.0257172	0.00266344		1.59		0.0265899	0.0249378	0.00165213		1.59		0.02487	0.000653039	0.024217		1.59		0.0376794	0.00713323	0.0305461		1.59		0.0149614	0.00966077	0.0053006
												1.6		0.0269969	0.0178324	0.00916451		1.6		0.0269607	0.0242736	0.00268715		1.6		0.0253577	0.0236812	0.00167648		1.6		0.025025	0.000589011	0.024436		1.6		0.0376197	0.00685297	0.0307668		1.6		0.0142318	0.00891023	0.0053216
												1.61		0.025974	0.0167704	0.00920359		1.61		0.0255851	0.0228749	0.00271026		1.61		0.0241593	0.0224588	0.0017005		1.61		0.025181	0.000530174	0.0246509		1.61		0.0375518	0.00657654	0.0309753		1.61		0.0135453	0.00820458	0.00534074
												1.62		0.0249867	0.0157478	0.00923898		1.62		0.0242555	0.0215228	0.00273276		1.62		0.0229961	0.021272	0.00172417		1.62		0.0253377	0.000476238	0.0248614		1.62		0.0374759	0.0063044	0.0311715		1.62		0.0129005	0.00754248	0.005358
												1.63		0.0240355	0.0147649	0.00927064		1.63		0.0229732	0.0202186	0.00275463		1.63		0.0218692	0.0201217	0.00174747		1.63		0.0254944	0.000426915	0.0250675		1.63		0.037392	0.00603694	0.0313551		1.63		0.0122959	0.0069225	0.00537338
												1.64		0.0231209	0.0138223	0.00929853		1.64		0.0217394	0.0189635	0.00277584		1.64		0.0207794	0.019009	0.00177036		1.64		0.0256509	0.000381917	0.025269		1.64		0.0373004	0.00577453	0.0315259		1.64		0.0117299	0.0063431	0.00538684
												1.65		0.0222429	0.0129202	0.00932261		1.65		0.0205547	0.0177583	0.00279639		1.65		0.0197275	0.0179346	0.00179283		1.65		0.0258067	0.000340963	0.0254658		1.65		0.037201	0.00551751	0.0316835		1.65		0.0112011	0.00580271	0.00539838
												1.66		0.0214015	0.0120586	0.00934285		1.66		0.0194197	0.0166035	0.00281625		1.66		0.0187139	0.016899	0.00181484		1.66		0.0259615	0.000303778	0.0256577		1.66		0.0370941	0.0052662	0.031828		1.66		0.0107077	0.0052997	0.00540798
												1.67		0.0205966	0.0112374	0.00935924		1.67		0.0183347	0.0154992	0.00283541		1.67		0.017739	0.0159026	0.00183639		1.67		0.0261147	0.000270095	0.0258446		1.67		0.0369798	0.00502086	0.0319589		1.67		0.010248	0.00483238	0.00541564
												1.68		0.0198278	0.0104561	0.00937174		1.68		0.0172995	0.0144456	0.00285385		1.68		0.016803	0.0149456	0.00185744		1.68		0.026266	0.000239655	0.0260264		1.68		0.036858	0.00478174	0.0320763		1.68		0.00982042	0.00439908	0.00542133
												1.69		0.0190946	0.00971428	0.00938034		1.69		0.016314	0.0134424	0.00287156		1.69		0.0159059	0.0140279	0.00187797		1.69		0.0264151	0.000212211	0.0262029		1.69		0.0367289	0.00454905	0.0321798		1.69		0.00942317	0.0039981	0.00542507
												1.7		0.0183964	0.00901138	0.00938504		1.7		0.0153776	0.0124891	0.00288851		1.7		0.0150476	0.0131496	0.00189797		1.7		0.0265615	0.000187525	0.026374		1.7		0.0365924	0.00432297	0.0322694		1.7		0.00905457	0.00362773	0.00542684
												1.71		0.0177324	0.00834662	0.00938582		1.71		0.0144898	0.0115851	0.00290471		1.71		0.0142277	0.0123103	0.0019174		1.71		0.026705	0.000165373	0.0265396		1.71		0.0364487	0.00410365	0.0323451		1.71		0.00871294	0.0032863	0.00542665
												1.72		0.0171018	0.00771912	0.00938269		1.72		0.0136498	0.0107296	0.00292012		1.72		0.0134459	0.0115096	0.00193625		1.72		0.0268452	0.000145538	0.0266996		1.72		0.0362977	0.00389122	0.0324065		1.72		0.00839662	0.00297214	0.00542448
												1.73		0.0165036	0.00712794	0.00937565		1.73		0.0128564	0.00992164	0.00293475		1.73		0.0127016	0.0107471	0.00195449		1.73		0.0269817	0.000127821	0.0268539		1.73		0.0361396	0.00368578	0.0324538		1.73		0.00810398	0.00268363	0.00542035
												1.74		0.0159367	0.00657201	0.0093647		1.74		0.0121086	0.00916002	0.00294857		1.74		0.0119942	0.0100221	0.0019721		1.74		0.0271143	0.000112031	0.0270023		1.74		0.0359741	0.00348737	0.0324868		1.74		0.00783343	0.00241917	0.00541426
												1.75		0.0154001	0.00605021	0.00934987		1.75		0.0114051	0.00844352	0.00296157		1.75		0.011323	0.00933391	0.00198908		1.75		0.0272428	9.79904e-05	0.0271448		1.75		0.0358015	0.00329606	0.0325054		1.75		0.00758342	0.00217721	0.00540622
												1.76		0.0148925	0.00556137	0.00933117		1.76		0.0107446	0.0077708	0.00297375		1.76		0.0106871	0.00868171	0.00200538		1.76		0.0273668	8.55344e-05	0.0272812		1.76		0.0356216	0.00311185	0.0325097		1.76		0.00735247	0.00195625	0.00539623
												1.77		0.0144128	0.00510424	0.00930862		1.77		0.0101255	0.00714039	0.00298509		1.77		0.0100856	0.00806463	0.00202101		1.77		0.027486	7.4509e-05	0.0274115		1.77		0.0354344	0.00293473	0.0324997		1.77		0.00713914	0.00175484	0.0053843
												1.78		0.0139598	0.00467755	0.00928225		1.78		0.00954636	0.00655078	0.00299558		1.78		0.00951764	0.00748171	0.00203593		1.78		0.0276003	6.4772e-05	0.0275355		1.78		0.03524	0.00276469	0.0324753		1.78		0.00694206	0.00157161	0.00537045
												1.79		0.0135321	0.00428001	0.00925209		1.79		0.00900559	0.00600037	0.00300522		1.79		0.00898207	0.00693194	0.00205013		1.79		0.0277094	5.61923e-05	0.0276532		1.79		0.0350382	0.00260166	0.0324366		1.79		0.0067599	0.0014052	0.0053547
												1.8		0.0131285	0.00391029	0.00921819		1.8		0.00850153	0.00548754	0.00301399		1.8		0.00847785	0.00641425	0.0020636		1.8		0.0278131	4.86494e-05	0.0277645		1.8		0.0348292	0.00244558	0.0323836		1.8		0.00659143	0.00125437	0.00533706
												1.81		0.0127476	0.00356707	0.00918058		1.81		0.00803251	0.00501063	0.00302189		1.81		0.00800385	0.00592753	0.00207632		1.81		0.0279113	4.20328e-05	0.0278692		1.81		0.0346129	0.00229636	0.0323165		1.81		0.00643544	0.0011179	0.00531754
												1.82		0.0123883	0.00324902	0.00913931		1.82		0.00759685	0.00456794	0.00302891		1.82		0.00755892	0.00547065	0.00208827		1.82		0.0280037	3.62418e-05	0.0279674		1.82		0.0343892	0.0021539	0.0322353		1.82		0.00629083	0.000994646	0.00529618
												1.83		0.0120493	0.00295483	0.00909443		1.83		0.00719284	0.0041578	0.00303504		1.83		0.00714189	0.00504246	0.00209944		1.83		0.0280901	3.11848e-05	0.0280589		1.83		0.0341581	0.00201807	0.0321401		1.83		0.00615653	0.000883539	0.00527299
												1.84		0.0117292	0.00268318	0.009046		1.84		0.00681879	0.00377852	0.00304028		1.84		0.00675157	0.00464175	0.00210982		1.84		0.0281705	2.67785e-05	0.0281437		1.84		0.0339197	0.00188876	0.032031		1.84		0.00603156	0.000783563	0.005248
												1.85		0.0114269	0.0024328	0.00899407		1.85		0.00647304	0.00342842	0.00304462		1.85		0.00638675	0.00426736	0.00211939		1.85		0.0282447	2.29478e-05	0.0282218		1.85		0.033674	0.0017658	0.0319082		1.85		0.00591499	0.000693765	0.00522123
												1.86		0.0111411	0.00220242	0.00893871		1.86		0.00615391	0.00310585	0.00304806		1.86		0.00604623	0.00391808	0.00212815		1.86		0.0283126	1.96248e-05	0.028293		1.86		0.0334209	0.00164905	0.0317718		1.86		0.00580597	0.000613255	0.00519271
												1.87		0.0108708	0.00199083	0.00887998		1.87		0.00585979	0.00280919	0.0030506		1.87		0.00572881	0.00359274	0.00213607		1.87		0.028374	1.67487e-05	0.0283572		1.87		0.0331604	0.00153835	0.031622		1.87		0.00570368	0.000541203	0.00516248
												1.88		0.0106148	0.00179682	0.00881797		1.88		0.0055891	0.00253687	0.00305223		1.88		0.0054333	0.00329014	0.00214316		1.88		0.0284288	1.42649e-05	0.0284146		1.88		0.0328926	0.00143351	0.0314591		1.88		0.0056074	0.000476837	0.00513056
												1.89		0.010372	0.00161925	0.00875273		1.89		0.00534028	0.00228732	0.00305296		1.89		0.00515854	0.00300913	0.00214941		1.89		0.0284771	1.21245e-05	0.0284649		1.89		0.0326176	0.00133437	0.0312832		1.89		0.00551644	0.00041944	0.00509699
												1.9		0.0101414	0.00145701	0.00868435		1.9		0.00511185	0.00205907	0.00305278		1.9		0.00490335	0.00274855	0.00215481		1.9		0.0285186	1.02843e-05	0.0285083		1.9		0.0323353	0.00124073	0.0310945		1.9		0.00543016	0.00036835	0.00506181
												1.91		0.00992194	0.00130903	0.00861291		1.91		0.00490237	0.00185068	0.00305169		1.91		0.00466663	0.00250729	0.00215934		1.91		0.0285533	8.70548e-06	0.0285446		1.91		0.0320458	0.0011524	0.0308934		1.91		0.005348	0.000322954	0.00502504
												1.92		0.00971278	0.00117428	0.0085385		1.92		0.00471044	0.00166075	0.00304969		1.92		0.00444725	0.00228424	0.00216301		1.92		0.0285811	7.35399e-06	0.0285738		1.92		0.0317491	0.0010692	0.0306799		1.92		0.00526943	0.000282691	0.00498674
												1.93		0.00951301	0.00105181	0.0084612		1.93		0.00453476	0.00148796	0.00304679		1.93		0.00424415	0.00207834	0.00216581		1.93		0.0286021	6.1996e-06	0.0285959		1.93		0.0314455	0.000990926	0.0304546		1.93		0.00519397	0.000247044	0.00494693
												1.94		0.00932177	0.00094067	0.0083811		1.94		0.00437404	0.00133105	0.00304299		1.94		0.00405629	0.00188856	0.00216773		1.94		0.0286161	5.21573e-06	0.0286109		1.94		0.0311348	0.000917381	0.0302175		1.94		0.0051212	0.000215539	0.00490566
												1.95		0.00913829	0.000839995	0.0082983		1.95		0.0042271	0.00118881	0.00303829		1.95		0.00388266	0.00171387	0.00216878		1.95		0.0286231	4.37902e-06	0.0286187		1.95		0.0308174	0.00084837	0.029969		1.95		0.00505071	0.000187746	0.00486297
												1.96		0.00896184	0.000748953	0.00821289		1.96		0.00409278	0.00106009	0.00303269		1.96		0.0037223	0.00155334	0.00216896		1.96		0.0286231	3.66902e-06	0.0286194		1.96		0.0304931	0.000783697	0.0297094		1.96		0.00498217	0.000163269	0.0048189
												1.97		0.00879173	0.000666762	0.00812497		1.97		0.00397003	0.000943821	0.00302621		1.97		0.00357428	0.00140602	0.00216826		1.97		0.0286161	3.06785e-06	0.028613		1.97		0.0301623	0.000723165	0.0294391		1.97		0.00491525	0.000141751	0.0047735
												1.98		0.00862732	0.000592688	0.00803463		1.98		0.00385781	0.000838977	0.00301884		1.98		0.0034377	0.00127102	0.00216668		1.98		0.028602	2.55993e-06	0.0285994		1.98		0.029825	0.000666583	0.0291584		1.98		0.00484968	0.000122869	0.00472681
												1.99		0.00846803	0.00052604	0.00794199		1.99		0.00375519	0.000744604	0.00301059		1.99		0.00331173	0.00114749	0.00216423		1.99		0.0285809	2.13174e-06	0.0285788		1.99		0.0294814	0.000613758	0.0288676		1.99		0.00478521	0.000106327	0.00467889
												2		0.00831332	0.000466176	0.00784714		2		0.00366127	0.000659804	0.00300147		2		0.00319554	0.00103463	0.00216091		2		0.0285528	1.77154e-06	0.028551		2		0.0291316	0.000564505	0.0285671		2		0.00472163	9.18629e-05	0.00462977
												2.01		0.00816269	0.000412496	0.00775019		2.01		0.00357523	0.000583739	0.00299149		2.01		0.00308838	0.000931663	0.00215672		2.01		0.0285176	1.46919e-06	0.0285161		2.01		0.0287759	0.000518639	0.0282573		2.01		0.00465874	7.92365e-05	0.0045795
												2.02		0.00801569	0.000364442	0.00765125		2.02		0.00349629	0.000515629	0.00298066		2.02		0.00298953	0.000837856	0.00215167		2.02		0.0284754	1.21595e-06	0.0284742		2.02		0.0284144	0.000475981	0.0279384		2.02		0.00459637	6.82341e-05	0.00452814
												2.03		0.00787191	0.000321495	0.00755042		2.03		0.00342373	0.000454747	0.00296898		2.03		0.00289828	0.000752518	0.00214577		2.03		0.0284262	1.0043e-06	0.0284252		2.03		0.0280473	0.000436356	0.027611		2.03		0.00453439	5.86635e-05	0.00447573
												2.04		0.00773098	0.000283178	0.0074478		2.04		0.00335689	0.000400421	0.00295647		2.04		0.00281401	0.000674997	0.00213901		2.04		0.0283701	8.27796e-07	0.0283693		2.04		0.0276749	0.000399594	0.0272753		2.04		0.00447267	5.03529e-05	0.00442232
												2.05		0.00759257	0.000249048	0.00734352		2.05		0.00329517	0.00035203	0.00294314		2.05		0.00273609	0.000604677	0.00213142		2.05		0.0283071	6.80916e-07	0.0283064		2.05		0.0272974	0.000365531	0.0269319		2.05		0.00441112	4.31491e-05	0.00436796
												2.06		0.00745638	0.000218698	0.00723768		2.06		0.00323799	0.000308998	0.00292899		2.06		0.00266397	0.000540982	0.00212299		2.06		0.0282371	5.58952e-07	0.0282366		2.06		0.026915	0.000334008	0.026581		2.06		0.00434963	3.69156e-05	0.00431271
												2.07		0.00732215	0.000191754	0.00713039		2.07		0.00318485	0.000270799	0.00291405		2.07		0.00259711	0.00048337	0.00211374		2.07		0.0281604	4.57896e-07	0.0281599		2.07		0.026528	0.000304871	0.0262231		2.07		0.00428815	3.1531e-05	0.00425662
												2.08		0.00718964	0.000167874	0.00702176		2.08		0.00313527	0.000236947	0.00289832		2.08		0.00253502	0.000431334	0.00210369		2.08		0.0280768	3.74343e-07	0.0280764		2.08		0.0261366	0.000277973	0.0258587		2.08		0.00422662	2.68879e-05	0.00419973
												2.09		0.00705865	0.000146744	0.0069119		2.09		0.00308882	0.000207	0.00288182		2.09		0.00247723	0.000384401	0.00209283		2.09		0.0279866	3.0541e-07	0.0279863		2.09		0.0257412	0.000253172	0.025488		2.09		0.00416499	2.2891e-05	0.0041421
												2.1		0.006929	0.000128078	0.00680093		2.1		0.00304512	0.000180553	0.00286456		2.1		0.00242332	0.000342131	0.00208119		2.1		0.0278896	2.48661e-07	0.0278894		2.1		0.0253419	0.000230332	0.0251115		2.1		0.00410323	1.94565e-05	0.00408377
												2.11		0.00680055	0.000111616	0.00668894		2.11		0.0030038	0.000157237	0.00284656		2.11		0.00237289	0.000304115	0.00206878		2.11		0.0277861	2.02042e-07	0.027786		2.11		0.0249391	0.000209325	0.0247297		2.11		0.00404132	1.65103e-05	0.00402481
												2.12		0.00667317	9.71223e-05	0.00657605		2.12		0.00296454	0.000136715	0.00282783		2.12		0.00232558	0.000269973	0.00205561		2.12		0.0276761	1.63828e-07	0.027676		2.12		0.024533	0.000190027	0.024343		2.12		0.00397925	1.39873e-05	0.00396526
												2.13		0.00654675	8.43819e-05	0.00646237		2.13		0.00292707	0.000118685	0.00280839		2.13		0.00228105	0.000239354	0.0020417		2.13		0.0275597	1.3257e-07	0.0275596		2.13		0.024124	0.00017232	0.0239517		2.13		0.00391701	1.18306e-05	0.00390518
												2.14		0.00642121	7.32011e-05	0.00634801		2.14		0.00289112	0.00010287	0.00278825		2.14		0.00223899	0.000211933	0.00202706		2.14		0.0274369	1.07056e-07	0.0274368		2.14		0.0237124	0.000156093	0.0235563		2.14		0.0038546	9.99003e-06	0.00384461
												2.15		0.00629648	6.34051e-05	0.00623307		2.15		0.00285645	8.90214e-05	0.00276743		2.15		0.00219912	0.00018741	0.00201171		2.15		0.0273079	8.62761e-08	0.0273078		2.15		0.0232984	0.000141241	0.0231572		2.15		0.00379203	8.42207e-06	0.00378361
												2.16		0.0061725	5.48364e-05	0.00611766		2.16		0.00282287	7.69158e-05	0.00274596		2.16		0.00216119	0.00016551	0.00199568		2.16		0.0271726	6.93872e-08	0.0271726		2.16		0.0228824	0.000127662	0.0227548		2.16		0.00372931	7.08861e-06	0.00372223
												2.17		0.00604924	4.73536e-05	0.00600188		2.17		0.00279019	6.63516e-05	0.00272384		2.17		0.00212495	0.00014598	0.00197897		2.17		0.0270313	5.56903e-08	0.0270313		2.17		0.0224648	0.000115263	0.0223495		2.17		0.00366647	5.95653e-06	0.00366051
												2.18		0.00592667	4.08295e-05	0.00588584		2.18		0.00275824	5.7148e-05	0.00270109		2.18		0.0020902	0.000128588	0.00196161		2.18		0.0268841	4.46057e-08	0.026884		2.18		0.0220457	0.000103955	0.0219418		2.18		0.00360351	4.99708e-06	0.00359851
												2.19		0.00580478	3.51508e-05	0.00576964		2.19		0.00272688	4.91435e-05	0.00267774		2.19		0.00205674	0.000113121	0.00194362		2.19		0.026731	3.56543e-08	0.0267309		2.19		0.0216256	9.36544e-05	0.021532		2.19		0.00354047	4.18533e-06	0.00353628
												2.2		0.00568358	3.02157e-05	0.00565336		2.2		0.00269599	4.21934e-05	0.0026538		2.2		0.00202439	9.93857e-05	0.00192501		2.2		0.0265721	2.84409e-08	0.0265721		2.2		0.0212048	8.42826e-05	0.0211205		2.2		0.00347737	3.49972e-06	0.00347387
												2.21		0.00556306	2.5934e-05	0.00553713		2.21		0.00266546	3.61692e-05	0.00262929		2.21		0.00199301	8.72051e-05	0.00190581		2.21		0.0264076	2.26405e-08	0.0264076		2.21		0.0207835	7.5766e-05	0.0207077		2.21		0.00341424	2.92165e-06	0.00341132
												2.22		0.00544324	2.22252e-05	0.00542101		2.22		0.00263519	3.09561e-05	0.00260423		2.22		0.00196246	7.64182e-05	0.00188604		2.22		0.0262375	1.79862e-08	0.0262375		2.22		0.0203621	6.80359e-05	0.0202941		2.22		0.00335111	2.43508e-06	0.00334868
												2.23		0.00532414	1.90177e-05	0.00530512		2.23		0.0026051	2.64527e-05	0.00257865		2.23		0.0019326	6.68789e-05	0.00186572		2.23		0.0260621	1.42595e-08	0.0260621		2.23		0.0199409	6.10279e-05	0.0198799		2.23		0.00328803	2.02623e-06	0.003286
												2.24		0.0052058	1.62484e-05	0.00518955		2.24		0.00257513	2.25687e-05	0.00255256		2.24		0.00190333	5.84546e-05	0.00184487		2.24		0.0258814	1.12819e-08	0.0258814		2.24		0.0195203	5.46822e-05	0.0194656		2.24		0.00322501	1.68327e-06	0.00322332
												2.25		0.00508823	1.38612e-05	0.00507437		2.25		0.0025452	1.92246e-05	0.00252598		2.25		0.00187455	5.10253e-05	0.00182352		2.25		0.0256955	8.90773e-09	0.0256955		2.25		0.0191004	4.8943e-05	0.0190515		2.25		0.00316209	1.39608e-06	0.0031607
												2.26		0.00497149	1.18067e-05	0.00495968		2.26		0.00251528	1.63502e-05	0.00249893		2.26		0.00184617	4.44826e-05	0.00180169		2.26		0.0255046	7.01882e-09	0.0255046		2.26		0.0186817	4.37584e-05	0.018638		2.26		0.00309932	1.156e-06	0.00309816
												2.27		0.0048556	1.00415e-05	0.00484556		2.27		0.00248533	1.38837e-05	0.00247144		2.27		0.00181813	3.87286e-05	0.0017794		2.27		0.0253088	5.51914e-09	0.0253088		2.27		0.0182645	3.90805e-05	0.0182254		2.27		0.00303672	9.55639e-07	0.00303576
												2.28		0.00474062	8.52711e-06	0.00473209		2.28		0.0024553	1.17706e-05	0.00244353		2.28		0.00179035	3.36752e-05	0.00175667		2.28		0.0251082	4.33102e-09	0.0251082		2.28		0.0178489	3.48646e-05	0.017814		2.28		0.00297433	7.88717e-07	0.00297354
												2.29		0.00462658	7.23012e-06	0.00461936		2.29		0.00242517	9.96343e-06	0.00241521		2.29		0.00176278	2.92433e-05	0.00173354		2.29		0.024903	3.39172e-09	0.024903		2.29		0.0174354	3.10697e-05	0.0174043		2.29		0.00291219	6.49889e-07	0.00291154
												2.3		0.00451354	6.12107e-06	0.00450742		2.3		0.00239493	8.4204e-06	0.00238651		2.3		0.00173538	2.53618e-05	0.00171002		2.3		0.0246933	2.6507e-09	0.0246933		2.3		0.0170241	2.76577e-05	0.0169965		2.3		0.00285034	5.34623e-07	0.0028498
												2.31		0.00440154	5.17426e-06	0.00439637		2.31		0.00236455	7.10512e-06	0.00235745		2.31		0.0017081	2.19669e-05	0.00168613		2.31		0.0244793	2.06734e-09	0.0244793		2.31		0.0166155	2.45936e-05	0.0165909		2.31		0.0027888	4.39083e-07	0.00278836
												2.32		0.00429063	4.36724e-06	0.00428626		2.32		0.00233404	5.98583e-06	0.00232805		2.32		0.00168091	1.90019e-05	0.00166191		2.32		0.0242611	1.60906e-09	0.0242611		2.32		0.0162097	2.18452e-05	0.0161879		2.32		0.00272761	3.60028e-07	0.00272725
												2.33		0.00418084	3.68047e-06	0.00417717		2.33		0.00230337	5.03491e-06	0.00229833		2.33		0.00165379	1.64158e-05	0.00163737		2.33		0.0240389	1.24981e-09	0.0240389		2.33		0.015807	1.93828e-05	0.0157876		2.33		0.00266681	2.94724e-07	0.00266651
												2.34		0.00407225	3.09699e-06	0.00406915		2.34		0.00227255	4.22837e-06	0.00226832		2.34		0.00162671	1.41633e-05	0.00161254		2.34		0.0238127	9.68789e-10	0.0238127		2.34		0.0154077	1.71792e-05	0.0153905		2.34		0.00260642	2.40872e-07	0.00260618
												2.35		0.00396488	2.60203e-06	0.00396228		2.35		0.00224158	3.54544e-06	0.00223804		2.35		0.00159966	1.2204e-05	0.00158745		2.35		0.0235828	7.49417e-10	0.0235828		2.35		0.0150119	1.52096e-05	0.0149967		2.35		0.00254649	1.96538e-07	0.00254629
												2.36		0.00385878	2.18286e-06	0.0038566		2.36		0.00221047	2.96811e-06	0.0022075		2.36		0.00157262	1.05022e-05	0.00156212		2.36		0.0233493	5.78533e-10	0.0233493		2.36		0.01462	1.34511e-05	0.0146066		2.36		0.00248704	1.60102e-07	0.00248688
												2.37		0.003754	1.82842e-06	0.00375217		2.37		0.00217921	2.48088e-06	0.00217673		2.37		0.0015456	9.02598e-06	0.00153657		2.37		0.0231123	4.45702e-10	0.0231123		2.37		0.0142322	1.1883e-05	0.0142203		2.37		0.0024281	1.30208e-07	0.00242797
												2.38		0.00365059	1.5292e-06	0.00364906		2.38		0.00214783	2.07036e-06	0.00214576		2.38		0.00151857	7.74721e-06	0.00151083		2.38		0.022872	3.42666e-10	0.022872		2.38		0.0138486	1.04863e-05	0.0138381		2.38		0.00236971	1.05723e-07	0.0023696
												2.39		0.00354857	1.277e-06	0.00354729		2.39		0.00211632	1.72504e-06	0.00211459		2.39		0.00149156	6.641e-06	0.00148492		2.39		0.0226286	2.62911e-10	0.0226286		2.39		0.0134695	9.24363e-06	0.0134603		2.39		0.00231188	8.57025e-08	0.00231179
												2.4		0.00344799	1.06477e-06	0.00344692		2.4		0.0020847	1.43506e-06	0.00208326		2.4		0.00146454	5.68538e-06	0.00145886		2.4		0.0223822	2.01306e-10	0.0223822		2.4		0.0130951	8.13938e-06	0.013087		2.4		0.00225464	6.93596e-08	0.00225458
												2.41		0.00334889	8.86464e-07	0.003348		2.41		0.00205297	1.19193e-06	0.00205178		2.41		0.00143754	4.86096e-06	0.00143268		2.41		0.0221329	1.53821e-10	0.0221329		2.41		0.0127256	7.15924e-06	0.0127184		2.41		0.00219804	5.60415e-08	0.00219798
												2.42		0.0032513	7.36891e-07	0.00325056		2.42		0.00202117	9.88439e-07	0.00202018		2.42		0.00141055	4.15071e-06	0.0014064		2.42		0.021881	1.17297e-10	0.021881		2.42		0.012361	6.29027e-06	0.0123547		2.42		0.00214207	4.52068e-08	0.00214203
												2.43		0.00315525	6.11623e-07	0.00315464		2.43		0.00198929	8.18393e-07	0.00198847		2.43		0.00138359	3.53964e-06	0.00138005		2.43		0.0216265	8.92619e-11	0.0216265		2.43		0.0120017	5.52077e-06	0.0119962		2.43		0.00208678	3.64072e-08	0.00208674
												2.44		0.00306078	5.06878e-07	0.00306027		2.44		0.00195736	6.76533e-07	0.00195668		2.44		0.00135666	3.01463e-06	0.00135364		2.44		0.0213697	6.77887e-11	0.0213697		2.44		0.0116478	4.84012e-06	0.0116429		2.44		0.00203218	2.92727e-08	0.00203215
												2.45		0.00296791	4.19431e-07	0.00296749		2.45		0.00192538	5.5838e-07	0.00192482		2.45		0.00132977	2.56417e-06	0.0013272		2.45		0.0211107	5.13759e-11	0.0211107		2.45		0.0112993	4.23877e-06	0.011295		2.45		0.00197828	2.34978e-08	0.00197826
												2.46		0.00287667	3.46542e-07	0.00287632		2.46		0.00189338	4.60135e-07	0.00189292		2.46		0.00130293	2.17819e-06	0.00130075		2.46		0.0208495	3.88573e-11	0.0208495		2.46		0.0109564	3.70809e-06	0.0109527		2.46		0.00192512	1.88314e-08	0.00192511
												2.47		0.00278708	2.85884e-07	0.00278679		2.47		0.00186138	3.78578e-07	0.001861		2.47		0.00127617	1.84791e-06	0.00127432		2.47		0.0205865	2.93289e-11	0.0205865		2.47		0.0106193	3.24032e-06	0.0106161		2.47		0.00187272	1.50671e-08	0.0018727
												2.48		0.00269915	2.35485e-07	0.00269892		2.48		0.00182938	3.10986e-07	0.00182907		2.48		0.00124948	1.56569e-06	0.00124792		2.48		0.0203218	2.20918e-11	0.0203218		2.48		0.0102881	2.82847e-06	0.0102853		2.48		0.00182107	1.20355e-08	0.00182106
												2.49		0.00261292	1.93675e-07	0.00261273		2.49		0.0017974	2.55058e-07	0.00179715		2.49		0.00122289	1.32485e-06	0.00122156		2.49		0.0200554	1.66064e-11	0.0200554		2.49		0.00996282	2.46629e-06	0.00996036		2.49		0.00177021	9.59825e-09	0.0017702
												2.5		0.0025284	1.59046e-07	0.00252824		2.5		0.00176547	2.08859e-07	0.00176527		2.5		0.00119641	1.1196e-06	0.00119529		2.5		0.0197876	1.24576e-11	0.0197876		2.5		0.0096436	2.14814e-06	0.00964145		2.5		0.00172015	7.64205e-09	0.00172014
												2.51		0.00244559	1.3041e-07	0.00244546		2.51		0.0017336	1.70758e-07	0.00173343		2.51		0.00117005	9.44929e-07	0.0011691		2.51		0.0195185	9.3261e-12	0.0195185		2.51		0.0093305	1.86899e-06	0.00932864		2.51		0.0016709	6.0746e-09	0.00167089
												2.52		0.00236451	1.06767e-07	0.0023644		2.52		0.0017018	1.39388e-07	0.00170166		2.52		0.00114383	7.96474e-07	0.00114303		2.52		0.0192483	6.96751e-12	0.0192483		2.52		0.00902361	1.62435e-06	0.00902198		2.52		0.00162247	4.82076e-09	0.00162246
												2.53		0.00228516	8.7277e-08	0.00228508		2.53		0.00167009	1.13601e-07	0.00166998		2.53		0.00111776	6.70473e-07	0.00111709		2.53		0.018977	5.19477e-12	0.018977		2.53		0.00872297	1.41019e-06	0.00872156		2.53		0.00157487	3.81948e-09	0.00157486
												2.54		0.00220756	7.12365e-08	0.00220749		2.54		0.00163849	9.24384e-08	0.0016384		2.54		0.00109186	5.63675e-07	0.00109129		2.54		0.0187049	3.86514e-12	0.0187049		2.54		0.00842864	1.22294e-06	0.00842742		2.54		0.00152811	3.02123e-09	0.00152811
												2.55		0.00213171	5.80555e-08	0.00213165		2.55		0.00160702	7.50998e-08	0.00160694		2.55		0.00106614	4.73274e-07	0.00106566		2.55		0.0184322	2.86996e-12	0.0184322		2.55		0.00814067	1.05939e-06	0.0081396		2.55		0.00148221	2.3859e-09	0.0014822
												2.56		0.00205761	4.72414e-08	0.00205756		2.56		0.00157568	6.09171e-08	0.00157562		2.56		0.00104061	3.96857e-07	0.00104021		2.56		0.0181588	2.12665e-12	0.0181588		2.56		0.00785907	9.16723e-07	0.00785815		2.56		0.00143716	1.8811e-09	0.00143716
												2.57		0.00198526	3.83831e-08	0.00198522		2.57		0.00154449	4.93349e-08	0.00154444		2.57		0.00101529	3.32348e-07	0.00101496		2.57		0.0178851	1.57264e-12	0.0178851		2.57		0.00758387	7.92401e-07	0.00758308		2.57		0.00139297	1.48069e-09	0.00139297
												2.58		0.00191465	3.11384e-08	0.00191462		2.58		0.00151348	3.98918e-08	0.00151344		2.58		0.000990201	2.77964e-07	0.000989923		2.58		0.0176111	1.16057e-12	0.0176111		2.58		0.00731509	6.84194e-07	0.0073144		2.58		0.00134966	1.1636e-09	0.00134966
												2.59		0.00184578	2.52226e-08	0.00184576		2.59		0.00148264	3.22053e-08	0.00148261		2.59		0.000965344	2.32179e-07	0.000965112		2.59		0.017337	8.54722e-13	0.017337		2.59		0.00705272	5.9012e-07	0.00705213		2.59		0.00130722	9.12926e-10	0.00130722
												2.6		0.00177865	2.03997e-08	0.00177863		2.6		0.00145201	2.59589e-08	0.00145198		2.6		0.000940736	1.93684e-07	0.000940542		2.6		0.0170629	6.28187e-13	0.0170629		2.6		0.00679677	5.08426e-07	0.00679627		2.6		0.00126565	7.15085e-10	0.00126565
												2.61		0.00171325	1.64738e-08	0.00171323		2.61		0.00142158	2.0891e-08	0.00142156		2.61		0.000916389	1.61362e-07	0.000916227		2.61		0.0167889	4.60749e-13	0.0167889		2.61		0.00654723	4.37565e-07	0.00654679		2.61		0.00122496	5.59203e-10	0.00122496
												2.62		0.00164956	1.32832e-08	0.00164955		2.62		0.00139138	1.6786e-08	0.00139137		2.62		0.000892315	1.3426e-07	0.000892181		2.62		0.0165152	3.37248e-13	0.0165152		2.62		0.00630407	3.76171e-07	0.00630369		2.62		0.00118515	4.36589e-10	0.00118515
												2.63		0.00158758	1.06943e-08	0.00158757		2.63		0.00136142	1.34663e-08	0.00136141		2.63		0.000868526	1.11565e-07	0.000868414		2.63		0.0162419	2.46347e-13	0.0162419		2.63		0.00606726	3.23038e-07	0.00606694		2.63		0.00114622	3.40303e-10	0.00114622
												2.64		0.00152729	8.5968e-09	0.00152729		2.64		0.00133171	1.07861e-08	0.0013317		2.64		0.000845031	9.25864e-08	0.000844939		2.64		0.0159692	1.79578e-13	0.0159692		2.64		0.00583677	2.77108e-07	0.0058365		2.64		0.00110816	2.64819e-10	0.00110816
												2.65		0.00146868	6.90019e-09	0.00146868		2.65		0.00130226	8.62572e-09	0.00130225		2.65		0.000821843	7.67368e-08	0.000821766		2.65		0.0156971	1.30639e-13	0.0156971		2.65		0.00561257	2.3745e-07	0.00561233		2.65		0.00107098	2.05742e-10	0.00107098
												2.66		0.00141173	5.52999e-09	0.00141173		2.66		0.00127308	6.88717e-09	0.00127307		2.66		0.000798969	6.35181e-08	0.000798906		2.66		0.0154258	9.48421e-14	0.0154258		2.66		0.0053946	2.03246e-07	0.00539439		2.66		0.00103467	1.59583e-10	0.00103467
												2.67		0.00135642	4.42512e-09	0.00135642		2.67		0.00124419	5.49036e-09	0.00124418		2.67		0.00077642	5.25084e-08	0.000776368		2.67		0.0151554	6.87133e-14	0.0151554		2.67		0.0051828	1.7378e-07	0.00518263		2.67		0.000999232	1.23578e-10	0.000999231
												2.68		0.00130274	3.53561e-09	0.00130273		2.68		0.00121559	4.36993e-09	0.00121558		2.68		0.000754204	4.33508e-08	0.000754161		2.68		0.0148861	4.96812e-14	0.0148861		2.68		0.00497713	1.48423e-07	0.00497698		2.68		0.000964655	9.55406e-11	0.000964655
												2.69		0.00125066	2.82061e-09	0.00125065		2.69		0.00118729	3.47267e-09	0.00118729		2.69		0.000732328	3.5744e-08	0.000732293		2.69		0.0146178	3.5847e-14	0.0146178		2.69		0.00477751	1.26629e-07	0.00477738		2.69		0.000930938	7.37435e-11	0.000930938
												2.7		0.00120016	2.24677e-09	0.00120015		2.7		0.00115931	2.75529e-09	0.00115931		2.7		0.000710801	2.94338e-08	0.000710771		2.7		0.0143509	2.58122e-14	0.0143509		2.7		0.00458387	1.07917e-07	0.00458377		2.7		0.000898073	5.68264e-11	0.000898073
												2.71		0.00115121	1.78695e-09	0.00115121		2.71		0.00113165	2.18265e-09	0.00113165		2.71		0.000689628	2.42062e-08	0.000689604		2.71		0.0140853	1.85485e-14	0.0140853		2.71		0.00439614	9.18702e-08	0.00439605		2.71		0.000866055	4.37187e-11	0.000866055
												2.72		0.00110381	1.41908e-09	0.00110381		2.72		0.00110432	1.7263e-09	0.00110432		2.72		0.000668816	1.98813e-08	0.000668796		2.72		0.0138212	1.33015e-14	0.0138212		2.72		0.00421425	7.81243e-08	0.00421417		2.72		0.000834875	3.35795e-11	0.000834875
												2.73		0.00105791	1.12522e-09	0.00105791		2.73		0.00107734	1.36321e-09	0.00107734		2.73		0.000648371	1.63079e-08	0.000648354		2.73		0.0135586	9.51934e-15	0.0135586		2.73		0.00403809	6.63628e-08	0.00403802		2.73		0.000804526	2.57497e-11	0.000804526
												2.74		0.0010135	8.90855e-10	0.0010135		2.74		0.0010507	1.07479e-09	0.0010507		2.74		0.000628297	1.33595e-08	0.000628283		2.74		0.0132977	6.79864e-15	0.0132977		2.74		0.00386759	5.63106e-08	0.00386753		2.74		0.000774998	1.97133e-11	0.000774998
												2.75		0.000970551	7.0423e-10	0.00097055		2.75		0.00102441	8.46059e-10	0.00102441		2.75		0.000608598	1.093e-08	0.000608588		2.75		0.0130386	4.84561e-15	0.0130386		2.75		0.00370265	4.7729e-08	0.00370261		2.75		0.000746284	1.50674e-11	0.000746284
												2.76		0.000929033	5.55854e-10	0.000929032		2.76		0.000998486	6.64953e-10	0.000998486		2.76		0.00058928	8.93071e-09	0.000589271		2.76		0.0127813	3.44656e-15	0.0127813		2.76		0.00354319	4.04112e-08	0.00354315		2.76		0.000718374	1.14976e-11	0.000718374
												2.77		0.00088892	4.38072e-10	0.000888919		2.77		0.000972928	5.2179e-10	0.000972927		2.77		0.000570344	7.28768e-09	0.000570337		2.77		0.012526	2.44643e-15	0.012526		2.77		0.00338909	3.41781e-08	0.00338906		2.77		0.000691256	8.75924e-12	0.000691256
												2.78		0.000850184	3.44722e-10	0.000850183		2.78		0.000947742	4.08804e-10	0.000947741		2.78		0.000551794	5.93923e-09	0.000551788		2.78		0.0122727	1.73297e-15	0.0122727		2.78		0.00324027	2.88749e-08	0.00324024		2.78		0.000664921	6.66218e-12	0.000664921
												2.79		0.000812797	2.70851e-10	0.000812797		2.79		0.000922933	3.19778e-10	0.000922933		2.79		0.000533632	4.83402e-09	0.000533627		2.79		0.0120216	1.22507e-15	0.0120216		2.79		0.00309662	2.43681e-08	0.00309659		2.79		0.000639357	5.05891e-12	0.000639357
												2.8		0.00077673	2.12486e-10	0.00077673		2.8		0.000898507	2.49745e-10	0.000898506		2.8		0.000515859	3.92938e-09	0.000515855		2.8		0.0117726	8.64254e-16	0.0117726		2.8		0.00295802	2.05423e-08	0.002958		2.8		0.000614553	3.8352e-12	0.000614553
												2.81		0.000741954	1.66444e-10	0.000741954		2.81		0.000874467	1.94742e-10	0.000874466		2.81		0.000498477	3.1899e-09	0.000498473		2.81		0.011526	6.08461e-16	0.011526		2.81		0.00282439	1.72983e-08	0.00282437		2.81		0.000590497	2.90274e-12	0.000590497
												2.82		0.000708439	1.3018e-10	0.000708439		2.82		0.000850817	1.51613e-10	0.000850817		2.82		0.000481485	2.58623e-09	0.000481483		2.82		0.0112817	4.27498e-16	0.0112817		2.82		0.0026956	1.45507e-08	0.00269558		2.82		0.000567177	2.19341e-12	0.000567177
												2.83		0.000676156	1.01662e-10	0.000676156		2.83		0.00082756	1.1785e-10	0.00082756		2.83		0.000464886	2.09408e-09	0.000464883		2.83		0.0110398	2.99741e-16	0.0110398		2.83		0.00257155	1.22262e-08	0.00257153		2.83		0.000544581	1.65471e-12	0.000544581
												2.84		0.000645075	7.92706e-11	0.000645075		2.84		0.0008047	9.14606e-11	0.0008047		2.84		0.000448677	1.69339e-09	0.000448675		2.84		0.0108004	2.09735e-16	0.0108004		2.84		0.00245212	1.02619e-08	0.00245211		2.84		0.000522695	1.24628e-12	0.000522695
												2.85		0.000615166	6.17168e-11	0.000615166		2.85		0.000782239	7.08687e-11	0.000782239		2.85		0.000432858	1.3676e-09	0.000432857		2.85		0.0105635	1.46455e-16	0.0105635		2.85		0.00233721	8.60376e-09	0.0023372		2.85		0.000501506	9.37126e-13	0.000501506
												2.86		0.000586399	4.7977e-11	0.000586399		2.86		0.000760179	5.48264e-11	0.000760179		2.86		0.000417428	1.10306e-09	0.000417427		2.86		0.0103293	1.02059e-16	0.0103293		2.86		0.0022267	7.20572e-09	0.00222669		2.86		0.000481003	7.03512e-13	0.000481003
												2.87		0.000558744	3.72393e-11	0.000558744		2.87		0.000738521	4.23486e-11	0.000738521		2.87		0.000402386	8.88535e-10	0.000402385		2.87		0.0100978	7.0975e-17	0.0100978		2.87		0.00212048	6.02828e-09	0.00212047		2.87		0.00046117	5.27273e-13	0.00046117
												2.88		0.000532172	2.88608e-11	0.000532172		2.88		0.000717267	3.2659e-11	0.000717267		2.88		0.000387729	7.14805e-10	0.000387728		2.88		0.00986895	4.92574e-17	0.00986895		2.88		0.00201843	5.03774e-09	0.00201843		2.88		0.000441994	3.94539e-13	0.000441994
												2.89		0.000506651	2.23333e-11	0.000506651		2.89		0.000696417	2.51467e-11	0.000696417		2.89		0.000373455	5.74299e-10	0.000373454		2.89		0.00964291	3.41153e-17	0.00964291		2.89		0.00192045	4.20538e-09	0.00192045		2.89		0.000423463	2.94737e-13	0.000423463
												2.9		0.000482153	1.72558e-11	0.000482153		2.9		0.000675973	1.93319e-11	0.000675973		2.9		0.000359561	4.60814e-10	0.00035956		2.9		0.0094197	2.35797e-17	0.0094197		2.9		0.00182642	3.50673e-09	0.00182641		2.9		0.000405561	2.19821e-13	0.000405561
												2.91		0.000458649	1.33124e-11	0.000458649		2.91		0.000655933	1.48382e-11	0.000655933		2.91		0.000346044	3.69276e-10	0.000346043		2.91		0.00919936	1.62643e-17	0.00919936		2.91		0.00173622	2.92096e-09	0.00173622		2.91		0.000388275	1.6368e-13	0.000388275
												2.92		0.000436108	1.02546e-11	0.000436108		2.92		0.000636299	1.13711e-11	0.000636299		2.92		0.0003329	2.95538e-10	0.0003329		2.92		0.00898194	1.11956e-17	0.00898194		2.92		0.00164975	2.43039e-09	0.00164975		2.92		0.000371591	1.21678e-13	0.000371591
												2.93		0.000414502	7.88708e-12	0.000414502		2.93		0.000617068	8.70042e-12	0.000617068		2.93		0.000320127	2.36218e-10	0.000320127		2.93		0.00876746	7.69072e-18	0.00876746		2.93		0.0015669	2.02001e-09	0.0015669		2.93		0.000355495	9.03063e-14	0.000355495
												2.94		0.000393803	6.05693e-12	0.000393803		2.94		0.000598241	6.64647e-12	0.000598241		2.94		0.000307719	1.8856e-10	0.000307719		2.94		0.00855598	5.27228e-18	0.00855598		2.94		0.00148755	1.6771e-09	0.00148755		2.94		0.000339973	6.69137e-14	0.000339973
												2.95		0.00037398	4.64438e-12	0.00037398		2.95		0.000579816	5.0694e-12	0.000579816		2.95		0.000295673	1.50322e-10	0.000295673		2.95		0.00834751	3.60695e-18	0.00834751		2.95		0.00141159	1.39088e-09	0.00141159		2.95		0.000325011	4.94997e-14	0.000325011
												2.96		0.000355008	3.55583e-12	0.000355008		2.96		0.000561791	3.86044e-12	0.000561791		2.96		0.000283983	1.19684e-10	0.000283983		2.96		0.00814209	2.4626e-18	0.00814209		2.96		0.00133892	1.15226e-09	0.00133892		2.96		0.000310595	3.65578e-14	0.000310595
												2.97		0.000336857	2.71827e-12	0.000336857		2.97		0.000544165	2.93515e-12	0.000544165		2.97		0.000272645	9.51664e-11	0.000272645		2.97		0.00793974	1.67787e-18	0.00793974		2.97		0.00126943	9.5353e-10	0.00126943		2.97		0.00029671	2.69556e-14	0.00029671
												2.98		0.000319502	2.07483e-12	0.000319502		2.98		0.000526935	2.22812e-12	0.000526935		2.98		0.000261655	7.55735e-11	0.000261654		2.98		0.0077405	1.14086e-18	0.0077405		2.98		0.00120302	7.88218e-10	0.00120302		2.98		0.000283343	1.9843e-14	0.000283343
												2.99		0.000302913	1.58129e-12	0.000302913		2.99		0.000510099	1.68874e-12	0.000510099		2.99		0.000251005	5.99367e-11	0.000251005		2.99		0.00754437	7.74136e-19	0.00754437		2.99		0.00113958	6.50858e-10	0.00113958		2.99		0.000270481	1.45833e-14	0.000270481
												3		0.000287067	1.20331e-12	0.000287067		3		0.000493654	1.27791e-12	0.000493654		3		0.000240692	4.74737e-11	0.000240692		3		0.00735138	5.2422e-19	0.00735138		3		0.00107901	5.36849e-10	0.00107901		3		0.000258108	1.07003e-14	0.000258108
												3.01		0.000271936	9.14288e-13	0.000271936		3.01		0.000477597	9.65501e-13	0.000477597		3.01		0.000230709	3.75535e-11	0.000230709		3.01		0.00716153	3.54259e-19	0.00716153		3.01		0.0010212	4.42329e-10	0.0010212		3.01		0.000246213	7.83838e-15	0.000246213
												3.02		0.000257495	6.93628e-13	0.000257495		3.02		0.000461925	7.28316e-13	0.000461925		3.02		0.000221051	2.96678e-11	0.000221051		3.02		0.00697485	2.38912e-19	0.00697485		3.02		0.000966069	3.64054e-10	0.000966068		3.02		0.00023478	5.73254e-15	0.00023478
												3.03		0.000243719	5.25422e-13	0.000243719		3.03		0.000446635	5.48531e-13	0.000446635		3.03		0.000211712	2.34076e-11	0.000211712		3.03		0.00679135	1.60793e-19	0.00679135		3.03		0.000913508	2.99304e-10	0.000913508		3.03		0.000223797	4.1856e-15	0.000223797
												3.04		0.000230584	3.97401e-13	0.000230584		3.04		0.000431722	4.12474e-13	0.000431722		3.04		0.000202686	1.84445e-11	0.000202686		3.04		0.00661102	1.07996e-19	0.00661102		3.04		0.000863425	2.45803e-10	0.000863425		3.04		0.000213251	3.05112e-15	0.000213251
												3.05		0.000218066	3.00115e-13	0.000218066		3.05		0.000417183	3.09675e-13	0.000417183		3.05		0.000193965	1.45149e-11	0.000193965		3.05		0.00643387	7.23863e-20	0.00643387		3.05		0.000815728	2.01645e-10	0.000815728		3.05		0.000203127	2.2205e-15	0.000203127
												3.06		0.000206141	2.263e-13	0.000206141		3.06		0.000403014	2.3213e-13	0.000403014		3.06		0.000185545	1.14077e-11	0.000185545		3.06		0.00625991	4.84192e-20	0.00625991		3.06		0.000770326	1.6524e-10	0.000770326		3.06		0.000193415	1.61337e-15	0.000193415
												3.07		0.000194788	1.7038e-13	0.000194788		3.07		0.00038921	1.73728e-13	0.00038921		3.07		0.000177419	8.95401e-12	0.000177419		3.07		0.00608914	3.23213e-20	0.00608914		3.07		0.00072713	1.35261e-10	0.00072713		3.07		0.0001841	1.17033e-15	0.0001841
												3.08		0.000183983	1.28083e-13	0.000183983		3.08		0.000375768	1.29815e-13	0.000375768		3.08		0.00016958	7.01901e-12	0.00016958		3.08		0.00592154	2.15314e-20	0.00592154		3.08		0.000686053	1.10599e-10	0.000686052		3.08		0.00017517	8.47559e-16	0.00017517
												3.09		0.000173704	9.61402e-14	0.000173704		3.09		0.000362681	9.68484e-14	0.000362681		3.09		0.000162022	5.49504e-12	0.000162022		3.09		0.00575713	1.43141e-20	0.00575713		3.09		0.00064701	9.03363e-11	0.00064701		3.09		0.000166612	6.12807e-16	0.000166612
												3.1		0.000163932	7.20535e-14	0.000163932		3.1		0.000349947	7.21398e-14	0.000349947		3.1		0.000154738	4.29639e-12	0.000154738		3.1		0.00559588	9.49663e-21	0.00559588		3.1		0.00060992	7.37052e-11	0.00060992		3.1		0.000158415	4.42352e-16	0.000158415
												3.11		0.000154645	5.39192e-14	0.000154645		3.11		0.000337559	5.36503e-14	0.000337559		3.11		0.000147722	3.35486e-12	0.000147722		3.11		0.00543779	6.28759e-21	0.00543779		3.11		0.000574703	6.00704e-11	0.000574703		3.11		0.000150567	3.18788e-16	0.000150567
												3.12		0.000145823	4.02875e-14	0.000145823		3.12		0.000325513	3.98367e-14	0.000325513		3.12		0.000140967	2.61626e-12	0.000140967		3.12		0.00528285	4.15442e-21	0.00528285		3.12		0.00054128	4.89047e-11	0.00054128		3.12		0.000143056	2.29365e-16	0.000143056
												3.13		0.000137447	3.00563e-14	0.000137447		3.13		0.000313803	2.95332e-14	0.000313803		3.13		0.000134467	2.03763e-12	0.000134467		3.13		0.00513105	2.73935e-21	0.00513105		3.13		0.000509575	3.97711e-11	0.000509575		3.13		0.00013587	1.64757e-16	0.00013587
												3.14		0.000129498	2.23893e-14	0.000129498		3.14		0.000302425	2.186e-14	0.000302425		3.14		0.000128215	1.58492e-12	0.000128215		3.14		0.00498236	1.80258e-21	0.00498236		3.14		0.000479516	3.23081e-11	0.000479516		3.14		0.000128999	1.18154e-16	0.000128999
												3.15		0.000121958	1.66526e-14	0.000121958		3.15		0.000291372	1.61549e-14	0.000291372		3.15		0.000122203	1.23119e-12	0.000122203		3.15		0.00483678	1.18373e-21	0.00483678		3.15		0.000451031	2.62169e-11	0.000451031		3.15		0.00012243	8.45951e-17	0.00012243
												3.16		0.000114809	1.23669e-14	0.000114809		3.16		0.000280641	1.192e-14	0.000280641		3.16		0.000116427	9.55174e-13	0.000116427		3.16		0.00469428	7.75749e-22	0.00469428		3.16		0.000424051	2.1251e-11	0.000424051		3.16		0.000116154	6.04689e-17	0.000116154
												3.17		0.000108034	9.17025e-15	0.000108034		3.17		0.000270224	8.78131e-15	0.000270224		3.17		0.000110879	7.40075e-13	0.000110879		3.17		0.00455484	5.07342e-22	0.00455484		3.17		0.000398509	1.7207e-11	0.000398509		3.17		0.00011016	4.31528e-17	0.00011016
												3.18		0.000101616	6.78951e-15	0.000101616		3.18		0.000260116	6.45889e-15	0.000260116		3.18		0.000105552	5.72673e-13	0.000105552		3.18		0.00441844	3.31125e-22	0.00441844		3.18		0.00037434	1.39173e-11	0.00037434		3.18		0.000104437	3.07452e-17	0.000104437
												3.19		9.55399e-05	5.01919e-15	9.55399e-05		3.19		0.000250312	4.74319e-15	0.000250312		3.19		0.000100441	4.42562e-13	0.000100441		3.19		0.00428506	2.15672e-22	0.00428506		3.19		0.000351481	1.12443e-11	0.000351481		3.19		9.89752e-05	2.18693e-17	9.89752e-05
												3.2		8.97896e-05	3.70482e-15	8.97896e-05		3.2		0.000240806	3.47775e-15	0.000240806		3.2		9.5539e-05	3.4157e-13	9.5539e-05		3.2		0.00415467	1.40186e-22	0.00415467		3.2		0.000329873	9.07485e-12	0.000329873		3.2		9.37653e-05	1.55304e-17	9.37653e-05
												3.21		8.43501e-05	2.73049e-15	8.43501e-05		3.21		0.000231591	2.54589e-15	0.000231591		3.21		9.08392e-05	2.63282e-13	9.08392e-05		3.21		0.00402724	9.09344e-23	0.00402724		3.21		0.000309456	7.31597e-12	0.000309456		3.21		8.87974e-05	1.10109e-17	8.87974e-05
												3.22		7.92071e-05	2.00933e-15	7.92071e-05		3.22		0.000222664	1.86079e-15	0.000222664		3.22		8.63357e-05	2.02676e-13	8.63357e-05		3.22		0.00390274	5.88657e-23	0.00390274		3.22		0.000290175	5.89157e-12	0.000290175		3.22		8.40623e-05	7.79386e-18	8.40623e-05
												3.23		7.43467e-05	1.47638e-15	7.43467e-05		3.23		0.000214017	1.3579e-15	0.000214017		3.23		8.20223e-05	1.55818e-13	8.20223e-05		3.23		0.00378115	3.80283e-23	0.00378115		3.23		0.000271975	4.73934e-12	0.000271975		3.23		7.95507e-05	5.50773e-18	7.95507e-05
												3.24		6.97554e-05	1.08314e-15	6.97554e-05		3.24		0.000205644	9.89356e-16	0.000205644		3.24		7.7893e-05	1.19639e-13	7.7893e-05		3.24		0.00366244	2.45167e-23	0.00366244		3.24		0.000254804	3.8083e-12	0.000254804		3.24		7.5254e-05	3.88582e-18	7.5254e-05
												3.25		6.54204e-05	7.93436e-16	6.54204e-05		3.25		0.00019754	7.19702e-16	0.00019754		3.25		7.39416e-05	9.17411e-14	7.39416e-05		3.25		0.00354656	1.57735e-23	0.00354656		3.25		0.000238612	3.05683e-12	0.000238612		3.25		7.11636e-05	2.73706e-18	7.11636e-05
												3.26		6.13291e-05	5.80331e-16	6.13291e-05		3.26		0.0001897	5.22717e-16	0.0001897		3.26		7.01623e-05	7.02575e-14	7.01623e-05		3.26		0.0034335	1.01276e-23	0.0034335		3.26		0.00022335	2.45097e-12	0.00022335		3.26		6.72711e-05	1.92475e-18	6.72711e-05
												3.27		5.74698e-05	4.23817e-16	5.74698e-05		3.27		0.000182116	3.79049e-16	0.000182116		3.27		6.65493e-05	5.37351e-14	6.65493e-05		3.27		0.00332322	6.48923e-24	0.00332322		3.27		0.000208972	1.96306e-12	0.000208972		3.27		6.35685e-05	1.35131e-18	6.35685e-05
												3.28		5.38308e-05	3.09043e-16	5.38308e-05		3.28		0.000174783	2.74435e-16	0.000174783		3.28		6.30968e-05	4.10451e-14	6.30968e-05		3.28		0.00321567	4.14946e-24	0.00321567		3.28		0.000195433	1.57056e-12	0.000195433		3.28		6.00478e-05	9.47172e-19	6.00478e-05
												3.29		5.04013e-05	2.25008e-16	5.04013e-05		3.29		0.000167696	1.9838e-16	0.000167696		3.29		5.97993e-05	3.13114e-14	5.97993e-05		3.29		0.00311083	2.6479e-24	0.00311083		3.29		0.000182691	1.25517e-12	0.000182691		3.29		5.67016e-05	6.62814e-19	5.67016e-05
												3.3		4.71705e-05	1.63574e-16	4.71705e-05		3.3		0.000160848	1.43176e-16	0.000160848		3.3		5.66512e-05	2.3855e-14	5.66512e-05		3.3		0.00300865	1.68625e-24	0.00300865		3.3		0.000170704	1.00202e-12	0.000170704		3.3		5.35225e-05	4.63068e-19	5.35225e-05
												3.31		4.41285e-05	1.18733e-16	4.41285e-05		3.31		0.000154234	1.03171e-16	0.000154234		3.31		5.36471e-05	1.81507e-14	5.36471e-05		3.31		0.00290911	1.07165e-24	0.00290911		3.31		0.000159433	7.99059e-13	0.000159433		3.31		5.05032e-05	3.22989e-19	5.05032e-05
												3.32		4.12654e-05	8.60529e-17	4.12654e-05		3.32		0.000147848	7.42262e-17	0.000147848		3.32		5.07818e-05	1.37926e-14	5.07818e-05		3.32		0.00281216	6.79664e-25	0.00281216		3.32		0.000148841	6.36514e-13	0.000148841		3.32		4.7637e-05	2.24917e-19	4.7637e-05
												3.33		3.85719e-05	6.22727e-17	3.85719e-05		3.33		0.000141685	5.33179e-17	0.000141685		3.33		4.80501e-05	1.04673e-14	4.80501e-05		3.33		0.00271776	4.30176e-25	0.00271776		3.33		0.000138891	5.06482e-13	0.000138891		3.33		4.49172e-05	1.56367e-19	4.49172e-05
												3.34		3.60392e-05	4.49954e-17	3.60392e-05		3.34		0.000135738	3.82387e-17	0.000135738		3.34		4.5447e-05	7.93345e-15	4.5447e-05		3.34		0.00262587	2.71713e-25	0.00262587		3.34		0.000129549	4.02575e-13	0.000129549		3.34		4.23373e-05	1.08533e-19	4.23373e-05
												3.35		3.36588e-05	3.24622e-17	3.36588e-05		3.35		0.000130002	2.73809e-17	0.000130002		3.35		4.29675e-05	6.00518e-15	4.29675e-05		3.35		0.00253646	1.71271e-25	0.00253646		3.35		0.000120782	3.19637e-13	0.000120782		3.35		3.98912e-05	7.52085e-20	3.98912e-05
												3.36		3.14225e-05	2.33843e-17	3.14225e-05		3.36		0.000124471	1.95752e-17	0.000124471		3.36		4.06069e-05	4.5397e-15	4.06069e-05		3.36		0.00244948	1.07738e-25	0.00244948		3.36		0.000112558	2.53509e-13	0.000112558		3.36		3.75727e-05	5.2031e-20	3.75727e-05
												3.37		2.93226e-05	1.68194e-17	2.93226e-05		3.37		0.00011914	1.39727e-17	0.00011914		3.37		3.83605e-05	3.42741e-15	3.83605e-05		3.37		0.0023649	6.7634e-26	0.0023649		3.37		0.000104849	2.00843e-13	0.000104849		3.37		3.53761e-05	3.59376e-20	3.53761e-05
												3.38		2.73515e-05	1.20791e-17	2.73515e-05		3.38		0.000114003	9.95793e-18	0.000114003		3.38		3.62237e-05	2.58429e-15	3.62237e-05		3.38		0.00228266	4.23713e-26	0.00228266		3.38		9.76237e-05	1.58945e-13	9.76237e-05		3.38		3.32959e-05	2.47814e-20	3.32959e-05
												3.39		2.55024e-05	8.66159e-18	2.55024e-05		3.39		0.000109056	7.08552e-18	0.000109056		3.39		3.41921e-05	1.94605e-15	3.41921e-05		3.39		0.00220274	2.64904e-26	0.00220274		3.39		9.08565e-05	1.25651e-13	9.08565e-05		3.39		3.13266e-05	1.70605e-20	3.13266e-05
												3.4		2.37683e-05	6.20153e-18	2.37683e-05		3.4		0.000104292	5.03372e-18	0.000104292		3.4		3.22614e-05	1.46354e-15	3.22614e-05		3.4		0.00212508	1.65279e-26	0.00212508		3.4		8.45212e-05	9.92225e-14	8.45212e-05		3.4		2.94632e-05	1.1726e-20	2.94632e-05
												3.41		2.21429e-05	4.43341e-18	2.21429e-05		3.41		9.97069e-05	3.57043e-18	9.97069e-05		3.41		3.04275e-05	1.09924e-15	3.04275e-05		3.41		0.00204965	1.0291e-26	0.00204965		3.41		7.85928e-05	7.82676e-14	7.85928e-05		3.41		2.77005e-05	8.04633e-21	2.77005e-05
												3.42		2.062e-05	3.16458e-18	2.062e-05		3.42		9.52948e-05	2.52852e-18	9.52948e-05		3.42		2.86861e-05	8.24548e-16	2.86861e-05		3.42		0.00197641	6.39449e-27	0.00197641		3.42		7.30481e-05	6.16709e-14	7.30481e-05		3.42		2.60338e-05	5.51235e-21	2.60338e-05
												3.43		1.91939e-05	2.25544e-18	1.91939e-05		3.43		9.10509e-05	1.78783e-18	9.10509e-05		3.43		2.70335e-05	6.177e-16	2.70335e-05		3.43		0.00190531	3.96521e-27	0.00190531		3.43		6.78645e-05	4.85407e-14	6.78645e-05		3.43		2.44586e-05	3.77021e-21	2.44586e-05
												3.44		1.7859e-05	1.60504e-18	1.7859e-05		3.44		8.69701e-05	1.26212e-18	8.69701e-05		3.44		2.54659e-05	4.62143e-16	2.54659e-05		3.44		0.0018363	2.45379e-27	0.0018363		3.44		6.30209e-05	3.81644e-14	6.30209e-05		3.44		2.29703e-05	2.57445e-21	2.29703e-05
												3.45		1.66099e-05	1.14046e-18	1.66099e-05		3.45		8.30476e-05	8.89594e-19	8.30476e-05		3.45		2.39794e-05	3.45313e-16	2.39794e-05		3.45		0.00176936	1.51537e-27	0.00176936		3.45		5.84972e-05	2.99735e-14	5.84972e-05		3.45		2.15648e-05	1.75507e-21	2.15648e-05
												3.46		1.54418e-05	8.09114e-19	1.54418e-05		3.46		7.92783e-05	6.26031e-19	7.92783e-05		3.46		2.25706e-05	2.57683e-16	2.25706e-05		3.46		0.00170443	9.33927e-28	0.00170443		3.46		5.42743e-05	2.3515e-14	5.42743e-05		3.46		2.02379e-05	1.19452e-21	2.02379e-05
												3.47		1.43498e-05	5.73164e-19	1.43498e-05		3.47		7.56576e-05	4.3986e-19	7.56576e-05		3.47		2.12359e-05	1.92042e-16	2.12359e-05		3.47		0.00164147	5.74403e-28	0.00164147		3.47		5.03339e-05	1.8428e-14	5.03339e-05		3.47		1.89858e-05	8.11681e-22	1.89858e-05
												3.48		1.33295e-05	4.05403e-19	1.33295e-05		3.48		7.21808e-05	3.08566e-19	7.21808e-05		3.48		1.99721e-05	1.42937e-16	1.99721e-05		3.48		0.00158045	3.52558e-28	0.00158045		3.48		4.66591e-05	1.44257e-14	4.66591e-05		3.48		1.78047e-05	5.50638e-22	1.78047e-05
												3.49		1.23766e-05	2.86308e-19	1.23766e-05		3.49		6.88434e-05	2.1612e-19	6.88434e-05		3.49		1.8776e-05	1.0625e-16	1.8776e-05		3.49		0.00152131	2.15952e-28	0.00152131		3.49		4.32334e-05	1.12804e-14	4.32334e-05		3.49		1.6691e-05	3.72939e-22	1.6691e-05
												3.5		1.1487e-05	2.01891e-19	1.1487e-05		3.5		6.56407e-05	1.51132e-19	6.56407e-05		3.5		1.76443e-05	7.88774e-17	1.76443e-05		3.5		0.00146402	1.32006e-28	0.00146402		3.5		4.00416e-05	8.81129e-15	4.00416e-05		3.5		1.56413e-05	2.52174e-22	1.56413e-05
												3.51		1.06569e-05	1.42148e-19	1.06569e-05		3.51		6.25684e-05	1.0552e-19	6.25684e-05		3.51		1.65741e-05	5.84807e-17	1.65741e-05		3.51		0.00140854	8.05267e-29	0.00140854		3.51		3.7069e-05	6.87513e-15	3.7069e-05		3.51		1.46523e-05	1.70236e-22	1.46523e-05
												3.52		9.8827e-06	9.99312e-20	9.8827e-06		3.52		5.96221e-05	7.3557e-20	5.96221e-05		3.52		1.55626e-05	4.33021e-17	1.55626e-05		3.52		0.00135482	4.90227e-29	0.00135482		3.52		3.4302e-05	5.35857e-15	3.4302e-05		3.52		1.37208e-05	1.14735e-22	1.37208e-05
												3.53		9.16089e-06	7.01456e-20	9.16089e-06		3.53		5.67977e-05	5.11953e-20	5.67977e-05		3.53		1.46069e-05	3.20216e-17	1.46069e-05		3.53		0.00130283	2.97828e-29	0.00130283		3.53		3.17275e-05	4.172e-15	3.17275e-05		3.53		1.28439e-05	7.72021e-23	1.28439e-05
												3.54		8.48826e-06	4.9163e-20	8.48826e-06		3.54		5.4091e-05	3.55754e-20	5.4091e-05		3.54		1.37043e-05	2.36491e-17	1.37043e-05		3.54		0.00125252	1.8057e-29	0.00125252		3.54		2.93333e-05	3.24464e-15	2.93333e-05		3.54		1.20187e-05	5.18624e-23	1.20187e-05
												3.55		7.86173e-06	3.44045e-20	7.86173e-06		3.55		5.1498e-05	2.46822e-20	5.1498e-05		3.55		1.28523e-05	1.74431e-17	1.28523e-05		3.55		0.00120385	1.09254e-29	0.00120385		3.55		2.71077e-05	2.52066e-15	2.71077e-05		3.55		1.12425e-05	3.4783e-23	1.12425e-05
												3.56		7.27842e-06	2.40397e-20	7.27842e-06		3.56		4.90147e-05	1.70975e-20	4.90147e-05		3.56		1.20484e-05	1.2849e-17	1.20484e-05		3.56		0.00115678	6.59685e-30	0.00115678		3.56		2.504e-05	1.9561e-15	2.504e-05		3.56		1.05125e-05	2.32901e-23	1.05125e-05
												3.57		6.73557e-06	1.67719e-20	6.73557e-06		3.57		4.66373e-05	1.18249e-20	4.66373e-05		3.57		1.12903e-05	9.45264e-18	1.12903e-05		3.57		0.00111128	3.9751e-30	0.00111128		3.57		2.31198e-05	1.51633e-15	2.31198e-05		3.57		9.82641e-06	1.55692e-23	9.82641e-06
												3.58		6.23061e-06	1.16835e-20	6.23061e-06		3.58		4.4362e-05	8.16534e-21	4.4362e-05		3.58		1.05755e-05	6.94502e-18	1.05755e-05		3.58		0.0010673	2.3904e-30	0.0010673		3.58		2.13374e-05	1.17415e-15	2.13374e-05		3.58		9.18175e-06	1.03909e-23	9.18175e-06
												3.59		5.7611e-06	8.12649e-21	5.7611e-06		3.59		4.21852e-05	5.62946e-21	4.21852e-05		3.59		9.90204e-06	5.09602e-18	9.90204e-06		3.59		0.00102481	1.43451e-30	0.00102481		3.59		1.96837e-05	9.08199e-16	1.96837e-05		3.59		8.57627e-06	6.92354e-24	8.57627e-06
												3.6		5.32475e-06	5.64379e-21	5.32475e-06		3.6		4.01032e-05	3.87501e-21	4.01032e-05		3.6		9.26769e-06	3.73444e-18	9.26769e-06		3.6		0.000983759	8.59109e-31	0.000983759		3.6		1.81502e-05	7.01721e-16	1.81502e-05		3.6		8.00781e-06	4.60569e-24	8.00781e-06
												3.61		4.9194e-06	3.91361e-21	4.9194e-06		3.61		3.81127e-05	2.66314e-21	3.81127e-05		3.61		8.67047e-06	2.73312e-18	8.67047e-06		3.61		0.000944119	5.13456e-31	0.000944119		3.61		1.67288e-05	5.41596e-16	1.67288e-05		3.61		7.47432e-06	3.05881e-24	7.47432e-06
												3.62		4.54301e-06	2.70971e-21	4.54301e-06		3.62		3.62102e-05	1.82739e-21	3.62102e-05		3.62		8.10846e-06	1.99769e-18	8.10846e-06		3.62		0.000905851	3.06245e-31	0.000905851		3.62		1.54118e-05	4.17554e-16	1.54118e-05		3.62		6.97384e-06	2.02815e-24	6.97384e-06
												3.63		4.19367e-06	1.87329e-21	4.19367e-06		3.63		3.43925e-05	1.25193e-21	3.43925e-05		3.63		7.57981e-06	1.45826e-18	7.57981e-06		3.63		0.000868917	1.82283e-31	0.000868917		3.63		1.41923e-05	3.21572e-16	1.41923e-05		3.63		6.50451e-06	1.34257e-24	6.50451e-06
												3.64		3.86958e-06	1.29308e-21	3.86958e-06		3.64		3.26562e-05	8.56338e-22	3.26562e-05		3.64		7.08277e-06	1.06311e-18	7.08277e-06		3.64		0.000833282	1.08276e-31	0.000833282		3.64		1.30635e-05	2.47383e-16	1.30635e-05		3.64		6.06457e-06	8.8729e-25	6.06457e-06
												3.65		3.56904e-06	8.91223e-22	3.56904e-06		3.65		3.09984e-05	5.84823e-22	3.09984e-05		3.65		6.61564e-06	7.74033e-19	6.61564e-06		3.65		0.000798908	6.41846e-32	0.000798908		3.65		1.20192e-05	1.90103e-16	1.20192e-05		3.65		5.65234e-06	5.85442e-25	5.65234e-06
												3.66		3.29047e-06	6.13316e-22	3.29047e-06		3.66		2.94161e-05	3.98766e-22	2.94161e-05		3.66		6.17683e-06	5.62831e-19	6.17683e-06		3.66		0.000765761	3.797e-32	0.000765761		3.66		1.10535e-05	1.45926e-16	1.10535e-05		3.66		5.26621e-06	3.8565e-25	5.26621e-06
												3.67		3.03238e-06	4.21425e-22	3.03238e-06		3.67		2.79061e-05	2.71473e-22	2.79061e-05		3.67		5.76479e-06	4.08727e-19	5.76479e-06		3.67		0.000733807	2.24161e-32	0.000733807		3.67		1.01609e-05	1.11894e-16	1.01609e-05		3.67		4.90469e-06	2.53625e-25	4.90469e-06
												3.68		2.79337e-06	2.89132e-22	2.79337e-06		3.68		2.64659e-05	1.84522e-22	2.64659e-05		3.68		5.37807e-06	2.96433e-19	5.37807e-06		3.68		0.000703011	1.32066e-32	0.000703011		3.68		9.33622e-06	8.57049e-17	9.33622e-06		3.68		4.56632e-06	1.66526e-25	4.56632e-06
												3.69		2.57212e-06	1.98065e-22	2.57212e-06		3.69		2.50925e-05	1.25224e-22	2.50925e-05		3.69		5.01526e-06	2.14712e-19	5.01526e-06		3.69		0.000673339	7.76483e-33	0.000673339		3.69		8.57471e-06	6.55741e-17	8.57471e-06		3.69		4.24976e-06	1.0916e-25	4.24976e-06
												3.7		2.36741e-06	1.35475e-22	2.36741e-06		3.7		2.37833e-05	8.48473e-23	2.37833e-05		3.7		4.67503e-06	1.55319e-19	4.67503e-06		3.7		0.000644758	4.556e-33	0.000644758		3.7		7.87183e-06	5.01171e-17	7.87183e-06		3.7		3.95371e-06	7.14389e-26	3.95371e-06
												3.71		2.17809e-06	9.25231e-23	2.17809e-06		3.71		2.25357e-05	5.7399e-23	2.25357e-05		3.71		4.35612e-06	1.12209e-19	4.35612e-06		3.71		0.000617237	2.66776e-33	0.000617237		3.71		7.22338e-06	3.82618e-17	7.22338e-06		3.71		3.67695e-06	4.66762e-26	3.67695e-06
												3.72		2.00306e-06	6.30926e-23	2.00306e-06		3.72		2.13472e-05	3.8769e-23	2.13472e-05		3.72		4.05733e-06	8.096e-20	4.05733e-06		3.72		0.000590743	1.55891e-33	0.000590743		3.72		6.62542e-06	2.91792e-17	6.62542e-06		3.72		3.41832e-06	3.04472e-26	3.41832e-06
												3.73		1.84134e-06	4.29581e-23	1.84134e-06		3.73		2.02153e-05	2.61445e-23	2.02153e-05		3.73		3.77751e-06	5.83377e-20	3.77751e-06		3.73		0.000565246	9.09086e-34	0.000565246		3.73		6.07428e-06	2.22284e-17	6.07428e-06		3.73		3.17673e-06	1.98285e-26	3.17673e-06
												3.74		1.69196e-06	2.92045e-23	1.69196e-06		3.74		1.91378e-05	1.76031e-23	1.91378e-05		3.74		3.51556e-06	4.19823e-20	3.51556e-06		3.74		0.000540714	5.29055e-34	0.000540714		3.74		5.56653e-06	1.69149e-17	5.56653e-06		3.74		2.95115e-06	1.28921e-26	2.95115e-06
												3.75		1.55406e-06	1.98241e-23	1.55406e-06		3.75		1.81123e-05	1.18335e-23	1.81123e-05		3.75		3.27046e-06	3.01731e-20	3.27046e-06		3.75		0.000517118	3.0726e-34	0.000517118		3.75		5.09897e-06	1.28575e-17	5.09897e-06		3.75		2.74059e-06	8.36847e-27	2.74059e-06
												3.76		1.4268e-06	1.34361e-23	1.4268e-06		3.76		1.71367e-05	7.9424e-24	1.71367e-05		3.76		3.04121e-06	2.16576e-20	3.04121e-06		3.76		0.000494428	1.78083e-34	0.000494428		3.76		4.66861e-06	9.76275e-18	4.66861e-06		3.76		2.54413e-06	5.42325e-27	2.54413e-06
												3.77		1.30941e-06	9.09274e-24	1.30941e-06		3.77		1.62088e-05	5.32237e-24	1.62088e-05		3.77		2.82689e-06	1.55252e-20	2.82689e-06		3.77		0.000472616	1.03003e-34	0.000472616		3.77		4.2727e-06	7.40482e-18	4.2727e-06		3.77		2.3609e-06	3.50884e-27	2.3609e-06
												3.78		1.20118e-06	6.14403e-24	1.20118e-06		3.78		1.53266e-05	3.561e-24	1.53266e-05		3.78		2.62661e-06	1.11148e-20	2.62661e-06		3.78		0.000451653	5.94552e-35	0.000451653		3.78		3.90863e-06	5.61026e-18	3.90863e-06		3.78		2.19007e-06	2.26651e-27	2.19007e-06
												3.79		1.10144e-06	4.14524e-24	1.10144e-06		3.79		1.44881e-05	2.37878e-24	1.44881e-05		3.79		2.43954e-06	7.94705e-21	2.43954e-06		3.79		0.000431513	3.42483e-35	0.000431513		3.79		3.57401e-06	4.24599e-18	3.57401e-06		3.79		2.03086e-06	1.46165e-27	2.03086e-06
												3.8		1.00956e-06	2.79245e-24	1.00956e-06		3.8		1.36914e-05	1.58654e-24	1.36914e-05		3.8		2.26487e-06	5.67474e-21	2.26487e-06		3.8		0.000412167	1.96879e-35	0.000412167		3.8		3.26659e-06	3.20998e-18	3.26659e-06		3.8		1.88254e-06	9.41063e-28	1.88254e-06
												3.81		9.24953e-07	1.87827e-24	9.24953e-07		3.81		1.29347e-05	1.05648e-24	1.29347e-05		3.81		2.10186e-06	4.04691e-21	2.10186e-06		3.81		0.000393591	1.12946e-35	0.000393591		3.81		2.98429e-06	2.42411e-18	2.98429e-06		3.81		1.74443e-06	6.04901e-28	1.74443e-06
												3.82		8.47087e-07	1.26145e-24	8.47087e-07		3.82		1.22162e-05	7.02405e-25	1.22162e-05		3.82		1.9498e-06	2.88229e-21	1.9498e-06		3.82		0.000375759	6.46624e-36	0.000375759		3.82		2.72519e-06	1.82864e-18	2.72519e-06		3.82		1.61586e-06	3.88187e-28	1.61586e-06
												3.83		7.75452e-07	8.45902e-25	7.75452e-07		3.83		1.15341e-05	4.66259e-25	1.15341e-05		3.83		1.808e-06	2.05017e-21	1.808e-06		3.83		0.000358645	3.69441e-36	0.000358645		3.83		2.48749e-06	1.37795e-18	2.48749e-06		3.83		1.49622e-06	2.48707e-28	1.49622e-06
												3.84		7.09578e-07	5.66381e-25	7.09578e-07		3.84		1.08869e-05	3.09016e-25	1.08869e-05		3.84		1.67584e-06	1.45639e-21	1.67584e-06		3.84		0.000342225	2.10643e-36	0.000342225		3.84		2.26951e-06	1.0372e-18	2.26951e-06		3.84		1.38494e-06	1.59083e-28	1.38494e-06
												3.85		6.4903e-07	3.78648e-25	6.4903e-07		3.85		1.02729e-05	2.0448e-25	1.02729e-05		3.85		1.55271e-06	1.03325e-21	1.55271e-06		3.85		0.000326475	1.19857e-36	0.000326475		3.85		2.06973e-06	7.79869e-19	2.06973e-06		3.85		1.28147e-06	1.0159e-28	1.28147e-06
												3.86		5.93401e-07	2.52755e-25	5.93401e-07		3.86		9.69073e-06	1.35093e-25	9.69073e-06		3.86		1.43805e-06	7.32094e-22	1.43805e-06		3.86		0.000311373	6.80592e-37	0.000311373		3.86		1.88669e-06	5.85742e-19	1.88669e-06		3.86		1.1853e-06	6.47695e-29	1.1853e-06
												3.87		5.42313e-07	1.68463e-25	5.42313e-07		3.87		9.1388e-06	8.91111e-26	9.1388e-06		3.87		1.33131e-06	5.18045e-22	1.33131e-06		3.87		0.000296895	3.85676e-37	0.000296895		3.87		1.71909e-06	4.39459e-19	1.71909e-06		3.87		1.09595e-06	4.12268e-29	1.09595e-06
												3.88		4.95418e-07	1.1211e-25	4.95418e-07		3.88		8.61574e-06	5.86873e-26	8.61574e-06		3.88		1.232e-06	3.66105e-22	1.232e-06		3.88		0.000283019	2.18107e-37	0.000283019		3.88		1.56568e-06	3.29349e-19	1.56568e-06		3.88		1.01297e-06	2.61986e-29	1.01297e-06
												3.89		4.52388e-07	7.44948e-26	4.52388e-07		3.89		8.1202e-06	3.85897e-26	8.1202e-06		3.89		1.13964e-06	2.58393e-22	1.13964e-06		3.89		0.000269725	1.23091e-37	0.000269725		3.89		1.42533e-06	2.4656e-19	1.42533e-06		3.89		9.35933e-07	1.66214e-29	9.35933e-07
												3.9		4.12924e-07	4.94248e-26	4.12924e-07		3.9		7.65089e-06	2.53345e-26	7.65089e-06		3.9		1.05378e-06	1.82135e-22	1.05378e-06		3.9		0.000256991	6.93258e-38	0.000256991		3.9		1.29699e-06	1.84381e-19	1.29699e-06		3.9		8.6444e-07	1.0528e-29	8.6444e-07
												3.91		3.76745e-07	3.27417e-26	3.76745e-07		3.91		7.20656e-06	1.66061e-26	7.20656e-06		3.91		9.73989e-07	1.28216e-22	9.73989e-07		3.91		0.000244798	3.89649e-38	0.000244798		3.91		1.17969e-06	1.37732e-19	1.17969e-06		3.91		7.98119e-07	6.6576e-30	7.98119e-07
												3.92		3.43592e-07	2.16569e-26	3.43592e-07		3.92		6.78601e-06	1.08677e-26	6.78601e-06		3.92		8.99878e-07	9.01423e-23	8.99878e-07		3.92		0.000233124	2.18556e-38	0.000233124		3.92		1.07252e-06	1.02773e-19	1.07252e-06		3.92		7.36619e-07	4.20319e-30	7.36619e-07
												3.93		3.13227e-07	1.43031e-26	3.13227e-07		3.93		6.38811e-06	7.10106e-27	6.38811e-06		3.93		8.3107e-07	6.32926e-23	8.3107e-07		3.93		0.000221952	1.22339e-38	0.000221952		3.93		9.74655e-07	7.66045e-20	9.74655e-07		3.93		6.79611e-07	2.64929e-30	6.79611e-07
												3.94		2.85425e-07	9.43197e-27	2.85425e-07		3.94		6.01175e-06	4.63257e-27	6.01175e-06		3.94		7.67213e-07	4.43827e-23	7.67213e-07		3.94		0.000211263	6.83401e-39	0.000211263		3.94		8.8533e-07	5.70368e-20	8.8533e-07		3.94		6.26788e-07	1.66714e-30	6.26788e-07
												3.95		2.59983e-07	6.21031e-27	2.59983e-07		3.95		5.65588e-06	3.01742e-27	5.65588e-06		3.95		7.07977e-07	3.10823e-23	7.07977e-07		3.95		0.000201038	3.80976e-39	0.000201038		3.95		8.03836e-07	4.24211e-20	8.03836e-07		3.95		5.77861e-07	1.04738e-30	5.77861e-07
												3.96		2.3671e-07	4.08283e-27	2.3671e-07		3.96		5.3195e-06	1.9623e-27	5.3195e-06		3.96		6.5305e-07	2.17394e-23	6.5305e-07		3.96		0.000191261	2.11949e-39	0.000191261		3.96		7.29522e-07	3.15164e-20	7.29522e-07		3.96		5.3256e-07	6.56941e-31	5.3256e-07
												3.97		2.1543e-07	2.68009e-27	2.1543e-07		3.97		5.00163e-06	1.27411e-27	5.00163e-06		3.97		6.02141e-07	1.51852e-23	6.02141e-07		3.97		0.000181914	1.17672e-39	0.000181914		3.97		6.61786e-07	2.33893e-20	6.61786e-07		3.97		4.90632e-07	4.11376e-31	4.90632e-07
												3.98		1.95982e-07	1.7566e-27	1.95982e-07		3.98		4.70136e-06	8.2597e-28	4.70136e-06		3.98		5.54976e-07	1.05933e-23	5.54976e-07		3.98		0.00017298	6.51972e-40	0.00017298		3.98		6.00074e-07	1.73391e-20	6.00074e-07		3.98		4.51841e-07	2.57183e-31	4.51841e-07
												3.99		1.78215e-07	1.14958e-27	1.78215e-07		3.99		4.41781e-06	5.34609e-28	4.41781e-06		3.99		5.11299e-07	7.38038e-24	5.11299e-07		3.99		0.000164444	3.60491e-40	0.000164444		3.99		5.43877e-07	1.28399e-20	5.43877e-07		3.99		4.15967e-07	1.60523e-31	4.15967e-07
												4		1.61991e-07	7.51173e-28	1.61991e-07		4		4.15012e-06	3.45479e-28	4.15012e-06		4		4.70869e-07	5.13527e-24	4.70869e-07		4		0.00015629	1.98916e-40	0.00015629		4		4.92725e-07	9.49781e-21	4.92725e-07		4		3.82802e-07	1.00028e-31	3.82802e-07
