# Supplementary material for: Concerted action of kinesins KIF5B and KIF13B promotes efficient secretory vesicle transport to microtubule plus ends
Source: eLife. 2020 Nov 11;9:e61302. doi: 10.7554/eLife.61302 (PMC7710357; doi:10.7554/eLife.61302)
Supplement: Figure 3—source data 1. [file elife-61302-fig3-data1.xlsx]

## Sheet: Figure 3A
Figure 3A
(µm/s)
		Control	KIF13B-KO	KIF13B-KO mixed	KIF5B-KO	KIF5B/13B-KO	4X-KO	4X-KO + KIF13B	4X-KO + KIF5B	4X-KO + KIF1B/1C	4X-KO + Eg5
		1.2585	1.3312	1.1153	1.583	0.765	1.645	1.8948	1.1999	1.9134	1.5431
		1.2547	1.2948	1.127	1.6252	2.2367	2.5483	1.6104	1.2128	1.698	1.7883
		1.445	1.2127	1.2573	1.912	1.6625	1.8596	1.6661	1.233	2.08	2.0939
		1.2361	1.3187	1.3277	1.9415	1.5513	1.6074	1.6445	1.2111	2.2156	1.5841
		1.3856	1.392	1.2824	1.8961	1.8463	2.0173	1.451	1.2889	2.1925	1.467
		1.2664	1.3687	1.2256	2.0355	2.0056	2.241	1.7516	1.4343	2.0205	1.8717
		1.3923	1.395	1.2274	2.0585	2.5937	1.618	1.6496	1.2677	1.9115	1.7671
		1.2027	1.0702	1.2178	1.6449	1.6188	2.2848	1.8164	1.3933	2.2786	1.892
		1.2878	1.2411	1.1078	2.2495	2.3117	2.2098	1.8112	1.2387	1.8186	1.4585
		1.2223	1.2815	1.1357	2.0666	1.9934	1.835	1.6185	1.1349	2.1972	1.8443
		1.4722	1.2049	1.2319	1.8242	2.0282	2.1259	1.8019	1.2141	1.348	1.9185
		1.2951	1.2778	1.2898	1.9915	1.9019	1.3485	1.7887	1.2703	1.9225	2.317
		1.3621	1.3375	1.3233	2.0032	1.6745	1.7732	1.5842	1.1405	2.0592	1.4
		1.3958	1.3575	1.2521	2.1611	1.7909	1.7648	1.6098	1.1509	2.4653	1.8754
		1.3346	1.3168	1.2562	1.8486	1.694	2.318	1.7923	1.1773	2.1601	1.7166
		1.3031	1.2562	1.2808	1.8362	1.8098	2.3865	1.5518	1.1524	2.0258	1.8589
		1.3604	1.324	1.2183	2.1375	2.174	2.3097	1.7744	1.1843	2.0468	1.9228
		1.3869	1.229	1.3688	1.7929	2.0849	2.5197	1.8412	1.1518	2.0403	1.9056
		1.2369	1.1921	1.2975	2.1619	2.1305	2.4599	2.0274	1.2908	1.9304	2.1728
		1.256	1.2477	1.2231	1.99	1.6383	2.3523	2.0173	1.1815	2.0304	2.3176
		1.4677	1.2607	1.4111	1.8005	1.9064	2.3606	1.3889	1.135	1.5144	2.6067
		1.4219	1.2992	1.2741	2.1243	2.1858		1.4966	1.218	1.6555	1.9544
		1.4915	1.1689	1.2194	1.7724			1.7906	1.2018	1.7222	1.9251
		1.5043	1.4067	1.1845	1.8633			1.8673	1.2656	1.4503	1.7642
		1.3147	1.3257	1.2657	1.4934			1.6015	1.2351	1.3472	1.5646
		1.5529	1.3965	1.2635	1.8652			1.9717	1.2861	1.9982	1.5692
		1.2218	1.3283	1.3154	1.7195			1.6782	1.3397	1.7212	2.1513
		1.4174		1.2105				1.5744	1.1977	1.4674	1.8362
		1.2805		1.2597				1.6371	1.2489	1.4484	1.7028
				1.2331				2.0642	1.319	2.1204	1.5084

## Sheet: Figure 3B
Figure 3B
(µm/s)
		Control	KIF13B-KO	KIF13B-KO mixed	KIF5B-KO	KIF5B/13B-KO	4X-KO	4X-KO + KIF13B	4X-KO + KIF5B	4X-KO + KIF1B/1C	4X-KO + Eg5
		2.121	1.069	0.902	1.897	0.765	1.645	1.514	0.748	1.291	0.96
		1.032	1.619	0.95	1.684	1.719	3.829	1.731	1.014	1.354	1.723
		0.897	1.076	0.911	1.692	3.217	2.122	1.364	1.041	0.696	2.113
		1.567	1.655	0.879	1.447	2.063	1.694	1.831	1.155	1.409	0.957
		1.136	1.325	1.263	0.534	3.383	2.924	1.025	1.358	1.493	1.622
		0.837	1.215	1.202	1.251	2.264	0.969	1.272	0.894	2.214	2.748
		1.307	1.41	1.13	1.906	1.81	2.031	1.364	1.408	2.615	0.678
		0.974	0.717	1.424	1.495	1.983	1.68	1.588	1.257	1.839	1.112
		1.111	1.482	1.587	1.607	2.361	1.875	1.543	3.008	1.415	2.516
		1.659	0.674	1.377	1.772	1.4	3.651	2.056	0.998	2.231	2.665
		1.062	1.445	0.786	2.06	2.167	0.935	1.577	1.041	2.442	1.787
		1.42	1.327	0.809	1.833	1.146	1.307	1.995	1.08	1.356	2.154
		1.057	2.11	0.932	1.948	1.698	1.632	2.274	0.668	1.779	0.836
		0.843	1.043	1.316	2.301	1.316	0.888	2.478	1.402	1.79	2.325
		1.15	2.416	0.665	1.785	1.753	2.538	2.462	1.066	1.783	0.988
		1.209	1.066	1.037	2.212	1.714	1.018	1.854	1.104	1.426	1.49
		1.207	1.431	1.254	1.317	2.475	1.881	2.4	1.015	1.907	1.481
		1.164	1.103	1.186	1.174	1.215	2.331	2.546	0.937	2.857	1.358
		1.045	1.655	1.191	1.162	1.341	1.611	1.657	1.29	1.875	1.841
		0.93	1.186	0.976	1.257	1.793	2.587	1.151	1.494	3.019	1.221
		2.111	1.493	0.948	1.053	1.264	2.45	2.733	1.155	2.541	1.452
		1.289	0.986	1.039	1.319	4.036	0.763	1.852	0.631	1.151	1.541
		1.487	1.605	1.101	1.777	1.301	2.816	1.828	1.418	0.758	1.186
		1.813	1.638	0.898	0.951	1.832	0.913	3.043	1.552	3.44	1.083
		2.174	1.326	1.066	1.557	1.769	2.995	1.321	1.466	2.842	1.005
		0.854	0.893	0.962	1.094	1.325	1.193	1.5	0.985	2.299	0.983
		1.612	1.803	1.036	0.827	1.544	2.533	1.001	1.26	1.302	1.453
		1.289	1.033	1.594	1.232	1.385	1.144	3.196	1.022	1.691	2.176
		1.716	1.098	1.113	1.902	1.811	1.2	2.794	0.639	1.896	1.255
		1.684	1.154	0.818	1.769	1.313	1.338	1.564	1.239	1.114	1.267
		1.884	1.156	2.408	2.496	1.219	1.032	1.284	1.706	1.709	1.263
		1.081	1.56	1.349	2.002	1.796	1.379	0.993	0.785	2.127	2.139
		2.029	1.461	0.812	1.976	1.169	1.057	1.66	1.155	0.851	1.398
		2.348	1.193	1.14	1.388	2.141	0.995	1.486	0.889	1.906	1.15
		1.653	1.228	1.205	0.886	1.776	2.571	1.36	1.007	0.888	0.727
		1.635	1.25	1.204	1.362	1.088	3.296	1.231	0.907	2.98	2.316
		1.297	1.317	1.098	1.381	2.449	2.891	0.999	0.71	1.948	1.229
		1.129	1.019	0.888	1.615	1.465	2.803	0.935	0.726	4.222	1.726
		1.446	1.514	1.216	1.501	1.85	1.233	1.484	0.863	2.167	1.51
		1.246	1.499	0.909	1.874	1.339	1.261	1.22	0.997	1.676	1.127
		1.289	0.986	0.667	1.717	1.649	2.176	1.139	1.332	2.623	3.214
		1.118	1.213	0.807	1.663	1.193	1.317	1.383	0.866	1.368	1.541
		1.271	1.531	1.219	2.011	1.991	2.165	1.329	1.25	1.478	2.298
		1.434	0.827	1.023	1.42	1.201	1.287	1.75	2.736	2.572	1.294
		0.546	1.502	0.998	1.399	1.175	2.902	1.178	1.333	1.625	1.528
		1.238	1.766	1.766	1.629	1.642	1.5	0.7	1.65	1.663	3.025
		0.634	1.411	1.618	1.056	1.162	1.084	1.467	0.942	0.886	1.656
		0.712	1.338	2.262	1.666	0.666	1.466	1.104	1.082	1.505	2.925
		1.486	0.941	1.534	1.317	1.142	1.256	1.465	0.975	1.946	1.461
		1.3	1.502	1.003	1.983	1.337	2.078	1.694	1.11	2.416	1.031
		1.226	1.256	1.094	2.397	1.84	1.668	1.335	0.999	2.12	2.019
		1.245	1.409	0.668	2.544	1.343	1.111	1.444	1.252	2.673	2.363
		1.199	1.422	1.784	0.721	1.18	1.584	0.944	3.166	3.289	2.029
		1.438	1.494	1.391	1.277	1.503	2.225	1.453	0.721	0.858	3.237
		1.013	1.424	1.208	0.832	2.244	3.155	1.797	2.725	3.956	2.36
		1.313	1.135	1.097	1.788	1.463	1.312	1.636	1.107	1.229	1.084
		1.976	1.03	0.691	1.207	1.05	3.006	1.535	1.163	2.313	1.244
		1.049	1.098	0.621	2.856	1.071	2.42	1.167	0.656	0.956	2.511
		1.036	1.437	1.003	1.375	1.411	2.542	1.314	1.142	0.972	1.663
		1.144	1.337	0.88	1.181	1.325	2.449	1.82	3.33	1.371	0.984
		1.057	1.545	1.619	1.07	2.937	1.232	0.87	1.079	1.36	1.981
		1.256	1.552	1.611	1.818	1.812	1.213	1.244	0.949	1.895	1.647
		0.847	1.454	1.143	0.992	1.446	1.326	1.764	0.814	2.055	1.259
		1.202	1.119	0.771	2.002	2.338	1.269	1.858	1.275	0.606	1.118
		1.105	1.23	1.136	1.771	4.008	2.247	1.502	0.737	1.351	3.403
		1.338	1.953	1.606	2.252	3.688	1.045	1.81	1.004	1.325	3.394
		2.142	1.202	0.94	0.977	2.666	1.419	1.623	0.943	1.876	1.926
		1.414	1.427	0.868	1.773	0.593	2.135	1.621	0.689	0.88	0.81
		0.851	1.232	1.443	2.724	0.655	2.104	1.987	1.862	1.472	0.762
		1.391	0.986	1.085	1.177	1.094	3.193	1.378	1.206	0.663	1.123
		0.971	1.567	1.437	1.504	1.006	1.518	1.633	1.37	1.719	0.914
		0.789	1.68	0.636	1.03	1.205	2.219	1.461	0.963	1.818	2.545
		1.449	2.766	1.178	1.054	1.579	1.005	1.739	1.455	2.843	3.304
		0.861	1.144	0.976	1.856	2.53	2.136	1.907	1.043	1.067	2.275
		1.613	1.471	1.037	1.676	2.421	2.44	0.807	1.339	0.565	2.61
		1.584	1.296	1.011	1.825	0.943	2.148	1.335	0.737	2.814	1.802
		1.429	1.305	1.138	2.363	1.763	2.46	1.434	0.899	2.043	2.716
		0.549	1.401	1.678	1.567	2.614	2.443	1.801	0.933	1.296	1.051
		1.173	1.037	1.793	3.04	1.832	2.543	1.263	0.924	1.693	0.879
		0.885	1.051	0.794	2.202	3.768	2.163	1.55	0.946	1.842	1.447
		0.976	1.611	1.363	1.97	1.477	0.918	2.142	0.916	1.017	1.782
		0.946	1.195	1.429	1.621	1.499	1.84	1.97	1.009	2.106	1.556
		1.197	1.368	0.876	2.485	0.983	2.458	1.222	0.975	0.838	1.714
		1.135	0.797	0.775	1.602	2.352	2.566	2.014	1.066	1.152	2.265
		1.656	1.197	0.958	1.827	1.504	2.811	1.497	2.534	1.774	1.079
		1.094	0.934	1.633	1.419	2.677	1.31	1.452	0.884	1.682	1.742
		0.685	1.607	0.965	1.762	2.36	2.022	1.23	1.122	1.362	3.011
		1.355	0.953	1.036	0.869	1.244	2.697	1.116	1.232	1.047	1.341
		1.514	1.415	1.442	0.477	1.162	2.424	0.839	1.282	3.919	0.891
		1.323	1.4	1.054	1.546	1.479	1.884	1.484	1.4	2.15	3.954
		1.411	1.825	0.764	1.888	3.668	1.022	0.876	1.014	3.061	1.63
		1.078	1.267	1.085	0.96	2.228	0.81	0.92	0.876	2.435	1.763
		1.114	1.03	1.261	0.716	0.675	1.772	0.959	1.343	2.625	2.206
		1.304	1.384	1.152	1.046	2.729	1.134	2.136	1.142	1.403	3.885
		1.219	1.179	1.611	1.851	0.719	1.425	1.475	1.349	1.601	2.144
		1.142	0.755	1.036	2.393	1.082	2.452	2.379	1.046	2.094	1.743
		1.162	1.485	0.692	1.835	1.612	2.091	1.757	1.208	2.004	2.502
		1.11	1.109	0.863	1.821	2.082	2.662	1.512	1.44	2.407	3.52
		1.102	0.701	0.903	1.807	1.752	1.936	1.614	0.803	1.522	1.261
		1.299	1.578	0.954	1.716	1.205	1.994	1.492	1.415	1.39	2.555
		0.869	1.322	0.677	2.372	2.023	2.388	1.144	1.281	1.039	1.049
		0.826	1.461	1.344	1.799	1.283	2.008	1.283	1.509	2.975	1.334
		0.923	2.278	1.167	2.563	1.394	2.059	1.52	1.31	2.621	1.013
		0.66	1.369	0.945	2.749	0.95	2.922	1.9	1.174	0.655	1.863
		1.939	1.355	0.862	1.88	0.845	2.46	1.006	0.834	1.673	0.788
		1.572	1.356	0.719	1.696	3.031	1.122	2.464	1.141	1.112	2.968
		1.342	1.321	1.189	2.109	1.442	0.645	1.469	1.207	1.553	1.138
		1.063	1.499	1.469	1.263	1.975	3.378	2.18	1.02	1.523	3.914
		2.189	1.069	1.465	1.183	3.47	2.376	2.223	1.293	1.538	1.871
		1.137	1.362	0.879	4.103	1.647	2.466	1.199	0.81	1.537	1.719
		1.386	1.26	1.054	1.496	1.817	0.858	1.863	1.05	1.676	1.488
		1.16	1.088	1.328	1.734	1.65	2.019	2.341	0.901	3.524	1.388
		1.192	1.443	0.89	1.565	2.062	2.853	0.749	0.834	2.645	0.836
		1.611	1.096	0.582	0.942	1.453	2.018	2.081	1.271	1.138	0.808
		1.211	1.491	0.592	2.141	1.315	5.101	1.276	1.082	1.669	2.004
		1.387	1.402	0.677	2.538	1.575	0.74	2.415	1.001	1.89	0.84
		1.563	1.395	1.036	3.448	1.865	3.571	1.423	0.908	0.929	0.803
		0.723	1.115	0.748	1.157	2.709	3.403	1.125	1.707	4.116	1.376
		1.005	1.722	1.016	1.187	1.73	2.944	1.405	0.816	2.935	0.871
		1.145	1.271	0.863	1.121	1.448	2.639	1.55	1.138	2.408	1.77
		1.155	0.904	1.523	1.955	1.505	1.96	2.021	1.115	3.218	0.844
		1.072	1.485	1.236	2.211	3.947	2.029	1.493	1.105	3.232	1.548
		1.422	1.988	0.92	2.309	1.733	3.884	1.92	1.023	1.25	1.36
		1.311	1.379	1.241	1.049	2.116	1.509	1.006	0.826	3.282	3.734
		1.499	1.285	1.385	2.243	2.495	1.13	1.92	1.115	3.207	1.975
		0.989	1.059	0.943	2.178	2.835	4.239	1.432	1.001	1.725	1.334
		1.621	1.384	1.154	1.207	1.534	2.76	1.615	1.047	2.922	1.341
		0.856	1.17	1.21	1.574	2.051	1.855	1.456	0.928	2.486	1.223
		1.554	1.659	1.337	2.323	2.7	0.64	1.385	0.733	1.571	1.35
		1.244	0.887	1.432	2.623	2.617	1.725	2.463	0.922	1.372	2.126
		1.183	1.752	1.424	1.014	2.817	2.992	1.515	1.648	1.7	0.966
		1.043	1.407	0.871	1.398	2.574	0.555	1.025	1.506	1.652	1.656
		0.978	1.103	1.175	0.977	1.964	2.649	1.395	1.091	2.526	1.411
		1.206	1.321	1.347	2.124	1.369	2.456	1.603	1.154	3.013	1.357
		1.386	1.126	1.53	1.851	1.794	2.759	1.213	1.021	0.935	0.919
		1.123	0.853	0.709	2.028	2.614	2.031	1.28	1.055	2.42	0.705
		1.766	1.551	1.252	1.941	2.445	1.847	1.521	1.084	1.424	2.307
		1.312	0.99	0.846	2.792	2.522	1.461	2.223	0.794	2.518	1.344
		1.145	1.404	0.628	1.4	0.77	2.167	1.829	1.376	1.89	1.117
		1.39	1.359	1.128	1.264	3.771	2.184	1.702	0.876	1.995	1.215
		1.69	1.278	1.919	1.316	1.472	2.304	1.543	0.878	1.68	1.33
		1.225	1.144	1.021	1.653	2.299	1.275	1.771	1.132	1.845	1.841
		1.234	1.353	1.554	1.905	1.086	1.547	1.791	0.939	3.484	1.042
		1.139	1.394	1.306	2.56	2.188	2.09	1.736	1.616	1.518	1.693
		1.297	1.468	1.329	2.617	1.927	1.267	1.66	0.991	1.913	2.386
		0.946	1.055	1.273	2.534	1.004	2.454	0.886	1.911	3.157	2.867
		1.233	1.226	1.282	2.503	2.18	1.133	1.966	0.736	1.776	2.091
		0.925	1.178	0.748	2.306	1.416	1.254	0.619	1.404	1.714	1.247
		1.21	1.223	0.63	2.755	1.669	1.358	2.039	2.288	1.932	1.737
		0.982	1.265	0.844	1.889	1.968	1.898	2.176	1.281	1.666	0.949
		0.89	1.06	1.066	0.909	2.514	2.459	1.813	1.265	2.538	2.88
		1.54	0.788	0.951	1.391	2.023	3.28	1.338	1.112	1.55	2.733
		1.102	1.026	1.499	1.241	2.617	1.818	1.729	1.069	1.685	2.682
		1.267	1.236	0.946	1.686	2.478	1.353	1.453	1.171	1.682	1.867
		1.546	1.3	1.283	1.325	1.985	1.878	2.479	1.072	1.447	1.004
		1.05	1.312	1.252	1.39	2.802	2.899	2.217	1.529	1.786	3.258
		1.029	1.21	0.983	2.189	2.796	2.103	1.551	1.178	2.157	2.779
		1.056	1.192	0.766	2.501	1.31	0.947	1.661	1.081	2.274	2.334
		0.771	1.402	1.017	1.91	3.885	1.558	1.799	3.039	2.347	1.763
		2.175	1.191	0.716	2.782	3.151	1.813	0.816	1.566	1.311	2.863
		1.625	1.136	1.021	2.52	1.543	2.881	1.926	1.491	2.196	3.41
		1.03	1.017	0.871	2.328	2.298	3.964	1.874	0.972	3.446	0.667
		0.685	1.359	1.053	2.259	1.714	3.487	0.929	1.091	1.337	0.998
		0.917	1.204	0.789	2.297	2.823	3.228	1.994	1.194	1.506	2.911
		0.996	1.021	1.626	2.172	2.629	2.102	1.208	1.226	2.856	0.767
		1.022	1.295	0.924	2.106	3.365	3.131	0.911	1.274	0.876	1.358
		0.977	1.471	0.637	2.548	2.665	1	1.581	0.891	1.675	1.748
		0.742	1.371	0.885	0.962	3.274	1.473	1.353	1.696	2.702	1.304
		1.216	1.088	1.278	1.81	2.671	1.167	3.024	2.086	1.695	1.45
		1.304	1.136	1.054	0.916	3.149	2.095	1.482	1.318	3.106	2.133
		2.51	1.432	0.677	1.917	3.114	1.418	1.396	1.126	3.931	1.516
		1.039	1.369	0.894	1.693	2.259	2.769	0.952	1.022	1.172	1.834
		1.035	1.488	1.218	0.911	2.511	2.909	2.295	0.865	1.592	0.795
		0.902	1.423	0.862	2.01	1.271	1.459	1.393	0.929	1.365	1.392
		1.972	1.498	0.869	2.647	1.069	0.797	2.055	1.253	2.021	1.958
		1.541	1.46	1.332	1.761	1.163	2.436	1.725	0.93	3.077	1.604
		1.091	1.433	1.411	1.756	0.912	1.218	1.834	0.838	2.217	1.611
		0.868	1.362	1.331	1.364	1.533	1.263	1.497	1.409	2.798	2.47
		0.844	1.2	0.996	1.625	0.865	1.291	2.34	1.024	2.297	2.13
		1.561	1.128	0.981	1.411	1.811	1.333	2.682	1.181	3.12	1.929
		1.069	1.411	1.049	1.294	1.536	2.076	2.41	1.057	1.552	3.014
		1.026	1.445	0.927	2.175	0.826	2.248	2.519	0.729	1.378	1.572
		1.143	2.389	0.556	2.194	1.413	1.479	1.392	1.265	1.408	1.128
		1.112	0.876	0.904	2.091	1.353	3.861	1.636	1.283	3.142	2.515
		1.194	1.48	0.578	1.746	0.96	4.102	1.007	1.084	2.292	2.822
		1.158	1.302	0.891	2.225	1.326	2.773	1.208	0.91	3.124	2.489
		1.184	1.003	1.532	1.705	1.381	2.951	1.385	1.468	2.619	1.989
		1.41	1.019	1.233	2.175	1.94	2.928	1.977	1.482	1.23	3.141
		1.481	1.016	1.229	2.949	0.749	2.425	2.056	1.402	2.267	1.208
		1.563	0.945	0.641	1.111	1.158	2.272	1.395	0.963	1.679	0.928
		2.844	0.89	2	1.884	1.305	3.481	2.424	1.156	3.115	2.044
		1.24	1.416	1.07	2.586	2.335	3.936	1.983	1.027	3.711	2.31
		1.341	1.283	1.431	0.965	1.952	0.865	1.921	2.597	1.999	0.901
		1.568	0.916	0.913	1.745	1.676	2.842	1.832	1.268	2.278	1.153
		1.419	1.125	1.004	2.333	2.033	3.3	1.526	1.16	2.564	1.801
		1.064	1.187	0.875	0.7	3.582	2.128	1.689	1.504	1.953	1.742
		0.923	1.025	1.366	3.06	0.852	2.002	2.6	1.174	2.939	2.265
		1.398	1.063	1.725	1.443	2.153	2.565	2.167	0.821	4.329	0.983
		0.994	1.341	1.175	3.086	1.832	3.743	2.666	1.281	0.977	1.937
		1.032	0.787	1.078	2.099	2.013	2.101	1.111	1.19	1.036	1.283
		1.274	1.57	1.025	1.359	1.425	1.463	1.331	1.287	2.978	2.23
		1.4	1.714	1.172	3.925	1.325	1.15	2.044	0.644	1.754	0.936
		1.055	1.541	1.062	1.941	1.043	1.33	2.164	1.27	3.218	1.512
		0.927	1.109	0.835	3.352	1.332	0.684	0.999	0.887	1.353	1.275
		2.307	1.297	0.928	1.416	1.695	1.749	0.842	1.654	3.423	0.846
		1.527	1.032	0.999	1.272	2.393	2.273	2.437	1.065	4.517	2.767
		1.66	1.124	0.984	2.173	1.181	2.73	0.844	1.23	3.183	0.907
		1.424	1.368	1.716	1.802	1.018	2.771	2.29	0.769	1.348	3.005
		2.43	1.323	1.465	2.05	1.327	1.188	1.581	1.133	3.414	1.161
		1.593	1.14	0.843	2.046	1.538	1.859	2.388	0.862	1.967	0.518
		0.921	1.125	1.108	2.347	1.893	0.997	1.147	1.08	1.524	1.214
		0.915	0.751	1.347	1.699	3.863	1.253	1.526	1.298	3.203	1.704
		2.094	1.063	0.822	2.23	1.535	2.199	2.193	1.171	3.077	2.029
		2.517	1.049	1.395	2.891	1.573	0.973	1.07	1.25	2.201	1.862
		1.332	1.389	1.114	1.313	1.75	1.456	2.15	1.012	0.976	2.269
		1.103	1.045	0.93	1.977	2.032	0.848	1.525	1.336	2.602	1.726
		0.755	1.977	1.252	1.763	1.829	2.162	2.256	1.237	2.067	1.857
		0.786	1.314	0.998	1.509	1.516	3.911	1.192	1.258	2.795	3.25
		1.203	1.284	1.295	1.954	1.971	1.93	0.968	0.629	2.518	1.653
		0.992	1.332	1.205	1.914	1.873	0.931	1.246	0.839	2.078	1.831
		0.966	1.565	1.462	1.068	2.291	1.245	2.238	1.041	2.886	2.486
		1.108	1.399	1.31	1.866	1.582	2.15	2.396	1.125	1.984	1.983
		1.011	1.233	1.404	2.658	2.109	1.939	2.29	0.945	3.089	1.996
		1.235	0.942	1.05	2.613	1.779	1.215	1.484	1.075	1.455	2.057
		1.093	3.481	1.31	2.964	1.195	2.217	1.483	0.984	0.79	1.566
		1.158	1.257	0.872	1.509	1.727	1.578	1.151	1.445	2.883	3.766
		1.469	1.451	1.024	1.906	1.24	2.902	1.532	1.641	2.877	1.256
		1.2	1.492	0.91	2.165	3.347	1.633	2.13	1.412	2.35	1.58
		0.875	1.429	0.727	1.764	0.906	3.336	1.788	0.784	2.298	1.474
		0.879	1.784	2.019	2.543	3.216	1.705	2.146	1.054	1.175	2.111
		1.94	1.841	1.137	3.211	2.87	3.14	1.198	1.151	3.667	2.04
		1.463	1.38	0.702	0.802	2.099	2.339	2.744	1.228	1.736	1.431
		1.99	1.137	1.168	2.964	4.195	1.346	1.601	1.499	1.7	0.74
		1.32	1.092	1.975	2.846	3.974	2.419	2.088	2.763	1.114	1.131
		1.945	0.917	1.55	2.888	2.4	2.361	2.179	1.295	2.037	1.857
		0.701	1.42	1.752	1.174	1.456	2.225	1.418	1.296	1.522	1.375
		1.382	0.981	0.779	1.755	3.304	1.952	1.426	1.114	2.553	1.412
		1.643	0.843	1.555	2.546	2.289	2.429	1.19	1.206	0.809	0.954
		1.388	1.544	1.06	2.002	1.566	1.886	1.594	2.136	2.944	1.044
		1.609	1.367	1.309	2.627	3.7	2.621	0.877	0.796	0.828	2.445
		0.801	0.854	1.599	1.394	2.729	3.522	0.789	2.274	1.626	1.473
		1.087	1.341	1.416	2.047	3.856	0.711	1.229	1.659	1.59	1.776
		1.248	0.814	1.036	2.678	1.73	1.064	2.102	0.961	1.415	2.38
		1.219	2.955	1.08	2.141	0.975	0.719	1.962	1.102	1.917	0.942
		0.922	1.112	0.68	2.116	1.181	1.602	1.506	1.334	3.518	0.952
		1.584	1.107	1.476	2.418	1.362	2.992	0.885	1.122	1.446	2.317
		1.06	1.018	1.087	2.557	1.652	2.197	1.8	1.017	2.772	1.981
		1.008	0.767	1.235	1.284	1.795	1.648	1.631	0.662	2.314	1.975
		1.071	1.196	1.377	0.697	0.928	2.636	1.059	1.362	1.968	2.299
		1.43	1.021	1.065	2.327	3.329	0.999	1.109	1.281	4.081	2.503
		1.418	1.116	1.358	2.084	1.137	0.663	2.134	1.196	3.166	2.393
		1.323	1.287	1.304	2.176	3.843	0.766	2.794	1.471	1.428	0.667
		1.054	1.191	1.216	0.868	1.671	0.861	1.409	1.16	2.234	0.905
		1.462	1.222	1.13	2.244	1.169	1.118	2.358	0.976	2.961	0.912
		1.34	1.211	1.319	2.731	1.182	0.956	2.643	1.04	3.299	2.332
		1.02	1.454	1.078	1.844	2.566	2.016	1.208	0.744	1.083	2.44
		0.858	1.275	0.825	1.171	2.776	1.525	2.634	0.988	3.149	2.733
		1.493	1.576	0.729	1.467	4.19	2.51	1.465	0.63	1.892	0.516
		1.335	1.412	1.21	1.841	0.751	0.971	1.982	1.18	1.262	1.64
		0.588	1.517	0.856	2.645	3.189	0.945	2.089	0.858	1.638	1.776
		1.043	1.03	0.957	2.191	1.719	0.758	1.315	0.821	1.092	0.74
		0.989	0.569	0.872	0.873	3.3	0.706	0.896	1.193	2.497	1.971
		1.475	1.11	1.169	3.428	1.333	2.28	1.453	1.573	1.495	1.791
		0.736	1.054	1.162	2.717	2.571	0.97	1.463	1.406	0.626	2.362
		1.109	1.304	1.669	1.731	1.462	0.979	1.421	1.507	4.014	2.408
		1.092	1.142	0.717	3.576	4.128	1.408	1.74	1.471	2.868	2.301
		0.943	0.852	1.167	2.232	1.479	1.117	0.686	0.91	1.173	0.98
		1.375	1.194	1.106	1.64	1.274	1.012	0.973	1.339	1.37	1.876
		0.906	1.299	1.102	1.73	3.564	1.443	1.207	1.09	0.766	2.7
		1.31	1.246	0.957	2.353	2.678	1.4	1.742	1.857	3.612	1.375
		1.061	0.911	0.809	2.33	0.87	1.004	2.48	2.85	0.812	1.146
		1.511	1.549	0.988	0.982	0.798	1.072	1.321	0.804	1.863	1.771
		1.366	1.43	1.178	1.817	1.172	1.246	1.354	1.265	1.254	1.528
		0.986	1.005	2.184	2.753	1.804	0.785	2.027	1.137	2.125	2.118
		0.924	1.381	1.027	1.19	0.999	1.766	1.509	1.095	2.557	2.644
		1.566	1.18	1.1	2.142	2.074	1.834	2.099	1.145	3.626	2.473
		1.19	1.501	1.072	2.242	1.964	1.173	1.085	1.187	1.748	1.214
		1.029	1.263	0.627	1.621	0.562	1.247	2.408	1.176	1.975	1.082
		0.887	0.915	1.51	1.386	2.46	1.813	1.022	0.981	2.373	2.509
		1.174	1.103	0.99	0.837	2.087	0.912	2.234	0.71	2.409	2.728
		1.449	1.281	1.327	2.029	2.253	0.892	2.174	1.21	2.359	2.18
		1.373	2.065	0.728	3.862	1.235	2.784	1.75	1.166	2.15	0.97
		0.987	1.162	1.57	1.582	2.314	1.682	1.273	1.033	2.851	0.786
		1.366	1.626	0.904	1.438	2.857	0.972	1.469	0.933	3.186	0.877
		1.359	0.862	1.388	1.863	2.052	1.04	1.329	0.6	2.053	2.068
		0.863	1.249	1.081	1.654	1.384	1.053	1.937	0.834	2.218	2.758
		1.603	1.346	0.968	2.081	1.056	1.541	1.268	1.636	2.676	1.671
		1.222	1.127	0.624	2.054	2.526	1.492	1.731	1.128	1.224	2.244
		0.75	0.845	0.749	2.651	2.297	1.447	1.135	0.854	0.584	1.713
		0.893	1.056	0.915	2.288	2.425	2.696	1.242	1.589	2.338	2.706
		1.036	0.999	0.838	2.278	1.17	3.279	1.404	1.594	2.661	0.955
		0.876	1.367	1.521	1.709	1.855	0.609	1.6	1.151	1.794	2.847
		1.17	1.125	0.824	1.337	3.507	1.77	1.889	1.165	3.437	0.775
		1.336	1.346	1.103	1.229	2.06	1.566	2.814	0.89	2.168	1.818
		1.456	1.071	0.954	1.988	2.489	2.455	2.065	1.314	1.765	1.325
		1.036	1.276	0.744	1.756	3.563	2.729	1.984	0.713	1.074	2.352
		1.725	1.19	1.103	1.84	2.757	1.028	1.746	1.665	1.405	3.766
		1.118	1.111	1.108	2.039	2.275	1.213	0.874	0.92	1.625	1.753
		1.274	1.278	1.06	1.224	3.31	2.065	1.629	1.543	2.295	2.013
		1.23	1.577	1.246	2.882	1.148	1.582	1.612	1.468	1.506	0.917
		1.058	1.284	1.091	2.044	1.617	2.201	1.435	1.115	0.705	2.349
		0.895	1.312	1.349	3.226	2.858	2.091	2.129	0.656	1.478	1.499
		1.259	1.117	1.09	1.835	1.602	2.009	1.281	0.728	0.733	2.382
		1.145	1.452	1.293	1.493	1.403	2.208	2.067	0.965	2.443	1.388
		1.225	1.526	1.062	1.808	2.259	1.291	2.564	0.603	2.8	2.75
		1.016	1.454	1.324	1.925	2.238	1.161	2.017	0.835	1.564	1.167
		1.167	1.047	1.377	0.634	3.375	2.235	2.375	1.45	1.837	3.947
		1.33	1.013	0.87	1.937	1.813	1.413	1.232	1.159	2.714	1.563
		0.938	0.977	1.527	1.303	1.373	0.829	1.787	1.254	2.525	2.654
		1.051	1.53	0.956	1.069	1.191	2.118	2.098	1.043	2.106	2.464
		1.394	1.118	1.593	1.394	2.13	2.674	0.859	1.535	2.735	2.465
		1.755	1.272	1.131	2.904	2.163	1.661	1.651	1.044	1.88	0.774
		1.264	1.096	0.988	3.168	3.028	1.505	1.139	0.933	2.06	2.519
		1.476	0.868	1.122	2.083	2.767	1.308	2.24	1.033	1.974	2.2
		1.297	1.455	1.057	1.943	1.53	2.183	1.35	1.154	1.66	2.284
		1.165	1	1.185	1.58	3.401	1.064	1.644	1.12	3.018	0.988
		1.233	1.025	0.92	1.718	0.794	2.215	1.693	0.975	1.743	1.189
		1.119	1.24	0.948	1.76	1.163	2.457	2.041	1.381	1.743	1.455
		1.283	1.361	1.064	2.477	3.231	2.325	1.551	1.278	2.246	3.612
		1.265	2.746	1.13	1.044	2.388	1.14	1.627	0.789	2.785	3.366
		0.998	1.973	1.415	3.028	1.022	1.478	0.976	0.93	1.76	0.961
		1.433	1.382	1.001	2.436	1.6	2.974	1.813	1.283	1.259	2.52
		2.478	1.495	0.855	2.726	2.384	0.7	1.197	0.831	1.924	3.038
		1.177	1.636	0.891	1.046	1.193	1.537	1.19	0.927	1.084	1.348
		1.331	1.72	1.216	0.754	1.849	1.792	2.074	1.451	2.711	1.916
		0.82	1.159	1.535	2.782	2.254	1.416	1.923	1.276	1.667	1.847
		1.076	0.931	1.344	2.721	3.212	2.051	1.822	0.761	1.056	1.71
		1.19	1.551	1.268	3.031	2.118	1.298	1.571	1.411	1.275	1.469
		1.624	1.786	1.017	2.746	0.852	1.703	1.952	1.27	2.708	0.72
		2.093	1.214	0.52	1.635	1.702	1.257	1.993	0.68	0.686	1.948
		0.631	0.549	1.13	2.511	1.259	0.92	2.313	1.428	1.348	1.119
		1.171	1.164	0.84	1.923	0.586	2.047	1.32	0.765	1.439	2.262
		1.447	1.102	1.13	2.178	2.013	1.416	1.651	0.815	2.295	1.162
		1.281	1.455	1.062	2.203	3.268	2.277	2.18	1.182	0.504	3.835
		1.14	1.283	1.313	2.217	2.005	2.05	2	0.923	0.927	2.034
		1.173	1.362	1.851	1.308	2.821	1.344	1.842	0.992	1.737	2.323
		0.938	1.669	1.242	2.031	1.66	3.057	1.451	1.201	3.175	3.791
		0.857	1.26	1.037	2.473	0.935	2.177	1.672	0.855	2.548	1.186
		1.207	1.924	1.458	2.255	1.062	1.589	1.499	0.952	2.925	2.634
		1.243	1.373	1.077	2.86	2.224	1.344	2.107	1.007	3.618	1.991
		1.279	1.895	1.156	1.099	1.232	0.888	0.814	1.532	1.91	3.415
		1.208	1.378	1.286	1.884	0.669	2.527	1.474	1.035	1.439	2.118
		0.957	1.308	1.011	1.756	1.377	2.76	2.242	0.918	0.987	1.672
		1.041	1.336	1.236	2.621	1.602	2.894	1.766	1.233	0.849	1.873
		1.527	1.274	1.174	2.14	1.561	1.354	1.51	1.041	3.331	2.812
		1.283	1.541	1.383	1.526	2.195	1.571	0.995	1.325	2.104	2.296
		1.339	1.89	1.491	2.074	2.091	1.084	1.499	1.37	3.272	2.107
		1.677	1.687	1.069	2.734	1.657	1.232	1.926	1.292	1.613	3.48
		2.518	0.984	2.142	2.496	1.53	1.297	1.26	1.231	2.031	1.753
		1.361	1.396	1.264	1.553	3.084	3.275	2.006	0.955	4.547	1.711
		1.257	1.325	1.289	1.983	2.571	1.777	1.326	1.503	2.058	0.558
		2.059	1.005	1.297	1.843	2.302	2.284	1.365	2.433	1.673	1.264
		1.286	1.162	1.233	1.205	1.938	1.493	2.274	0.948	0.618	2.401
		0.814	1.625	1.058	2.355	1.709	1.008	1.782	1.025	1.708	0.809
		1.383	1.392	1.333	2.445	1.019	1.083	1.934	1.304	0.984	2.145
		1.279	1.253	0.899	1.965	2.412	0.717	0.989	1.062	1.648	2.587
		1.204	0.939	1.408	2.081	2.697	1.917	1.7	1.218	2.175	2.002
		1.117	1.223	0.952	1.905	2.156	1.373	1.88	1.387	1.735	1.887
		1.077	1.229	1.147	2.591	0.66	1.89	2.212	1.163	4.485	3.316
		2.418	1.374	1.294	0.911	0.887	2.781	1.599	0.953	2.432	2.346
		1.1	1.035	1.025	2.279	2.685	1.477	1.083	1.09	3.561	1.57
		1.326	1.152	1.327	2.502	1.043	2.566	1.963	0.931	2.305	2.417
		1.227	1.522	0.949	2.176	2.867	2.845	2.42	1.088	2.412	2.127
		1.034	1.224	0.759	1.458	2.058	2.181	1.785	1.718	1.639	1.661
		1.765	2.072	1.165	1.83	2.638	2.157	2.09	1.999	1.829	2.411
		1.207	1.473	1.166	2.094	3.472	2.235	1.981	0.935	1.917	1.301
		2.748	0.923	1.268	1.717	2.363	2.94	1.009	1.145	1.603	1.371
		1.217	0.764	1.635	2.24	2.085	2.885	0.998	0.884	1.706	3.775
		1.617	1.389	1.252	1.917	2.322	0.805	1.019	0.763	2.917	2.971
		1.493	1.314	0.992	2.363	1.348	2.914	2.093	1.169	2.263	2.826
		1.567	1.83	1.574	2.576	0.888	0.959	1.409	1.209	2.41	2.62
		2.429	1.327	1.558	1.588	0.884	1.541	1.528	0.888	2.851	3.354
		2.077	1.329	1.461	2.076	1.268	2.563	1.412	1.594	2	3.363
		0.938	1.429	1.129	2.585	0.976	2.129	1.937	1.981	2.99	2.33
		1.305	0.922	1.116	2.358	1.297	2.567	2.146	0.882	2.171	3.347
		1.09	2.505	1.056	1.978	1.73	1.432	2.053	1.06	1.741	2.575
		2.638	1.027	0.757	3.541	1.518	3.329	1.774	3.655	2.047	2.793
		1.216	1.436	1.264	2.247	1.198	1.451	1.592	1.587	1.388	2.853
		2.182	0.685	1.855	2.198	2.923	1.931	1.67	1.13	3.668	1.78
		0.949	1.025	1.066	1.948	0.655	2.496	1.474	1.047	2.938	2.092
		0.905	0.63	1.296	1.109	0.682	3.037	0.724	1.199	0.799	1.049
		1.695	0.943	1.366	1.573	1.884	1.879	1.162	1.998	0.741	1.047
		1.943	0.739	1.229	2.365	1.779	2.818	0.499	3.4	1.483	1.077
		2.288	1.093	1.642	1.087	1.351	3.567	2.755	3.141	1.903	1.065
		1.256	1.048	0.689	1.087	2.189	3.762	0.988	1.111	0.744	0.928
		2.27	1.002	0.804	1.104	3.024	1.545	1.517	0.863	1.717	3.899
		2.549	1.12	1.629	0.797	1.786	1.632	1.897	1.342	2.067	1.844
		2.103	1.126	1.476	1.92	4.766	1.627	1.287	1.258	1.36	1.584
		1.647	1.229	1.441	1.027	1.628	1.929	1.739	0.879	1.696	1.182
		0.828	0.864	1.59	1.532	1.429	2.828	2.142	0.601	0.58	2.751
		1.639	1.437	1.167	1.17	0.952	2.679	1.074	2.476	1.957	1.172
		1.542	1.234	1.436	1.252	2.059	1.832	1.653	1.273	3.048	2.216
		1.087	1.28	1.513	1.466	1.425	3.31	1.602	1.022	1.473	0.643
		0.824	1.307	1.402	1.432	2.08	1.729	1.825	1.336	2.023	1.133
		0.903	1.112	1.422	0.654	1.14	2.169	1.741	0.952	1.888	0.706
		1.112	1.323	1.813	2.821	1.869	3.238	1.764	0.996	2.621	1.192
		1.532	1.322	1.139	1.495	2.824	2.372	1.778	1.542	1.638	0.706
		0.801	1.067	1.301	1.122	1.445	2.15	2.091	0.935	0.762	1.083
		1.498	1.072	1.332	1.601	1.544	2.384	1.351	1.098	1.024	1.16
		1.51	0.934	1.135	1.725	1.769	1.258	3.145	1.039	3.009	1.727
		1.785	1.342	0.968	1.141	3.257	2.546	2.119	1.171	1.803	1.994
		1.004	1.112	1.608	1.089	1.02	2.709	1.365	2.243	2.711	0.978
		1.099	1.06	1.231	1.096	1.082	0.952	1.504	0.952	2.539	1.036
		2.112	0.757	1.133	1.008	0.937	2.635	1.757	1.164	0.702	0.949
		1.079	1.186	1.2	0.745	1.903	1.219	1.967	0.884	2.746	1.049
		2.054	1.066	0.923	0.807	1.597	1.815	1.827	0.892	2.102	1.363
		1.459	0.944	1.059	1.133	1.576	2.804	1.772	1.484	1.256	1.193
		1.217	0.567	2.063	1.676	1.121	2.719	1.99	0.716	1.209	1.3
		1.269	1.247	1.165	0.837	0.806	2.971	1.612	1.245	2.301	1.103
		2.798	1.178	2.007	1.349	1.109	2.62	1.881	1.993	2.31	1.736
		1.374	1.511	0.725	1.723	1.264	1.98	1.203	1.043	2.253	1.074
		1.798	1.484	1.159	0.91	1.652	2.659	0.886	0.836	2.344	1.735
		1.596	1.479	1.357	1.647	0.823	2.703	1.044	1.026	1.671	1.833
		0.614	1.09	1.573	0.915	2.87	1.087	1.297	0.995	1.772	2.007
		1.33	1.192	1.062	2.426	0.743	2.561	1.603	0.819	1.636	0.921
		1.107	0.934	0.908	1.601	1.458	2.621	1.764	0.972	1.892	2.142
		1.123	1.398	1.143	2.094	1.034	1.96	1.531	0.92	1.424	2.967
		1.146	1.373	0.581	0.618	2.616	1.611	1.645	1.026	1.756	2.477
		1.232	1.157	0.804	2.475	2.025	2.242	1.795	0.695	1.691	1.638
		1.614	0.997	0.802	1.667	4.109	3.416	1.289	1.162	2.047	1.678
		1.462	0.804	0.748	0.922	1.093	1.623	1.625	1.728	1.986	2.604
		1.392	1.27	1.277	1.512	0.567	2.967	2.116	1.519	2.634	1.973
		1.213	1.026	1.586	1.317	4.196	2.751	2.587	2.285	2.194	2.143
		1.547	1.177	1.23	2.224	3.408	1.325	1.853	1.081	2.643	1.374
		1.539	1.65	1.065	2.242	2.26	1.265	1.693	1.145	1.432	0.558
		1.622	0.892	0.836	1.809	2.634	2.982	1.661	1.356	1.225	3.137
		1.239	0.996	2.247	2.169	1.37	2.519	1.526	0.962	0.969	1.43
		2.2	1.466	1.138	1.867	2.284	2.059	1.187	0.905	2.747	1.082
		2.177	1.154	1.168	1.446	1.475	2.945	0.838	1.058	1.613	3.491
		2.755	0.92	1.208	0.901	1.474	2.62	1.64	1.208	2.034	3.255
		1.379	1.216	1.015	2.471	1.631	3.328	1.78	1.141	0.68	0.563
		1.324	1.084	1.239	2.21	1.519	3.704	1.477	0.88	2.172	1.061
		3.132	0.961	1.21	1.246	0.872	2.734	1.137	1.794	1.857	2.358
		1.744	1.378	1.222	1.372	2.178	3.465	1.723	0.925	1.587	1.355
		1.54	1.021	1.429	1.881	3.127	2.293	1.633	1.234	2.096	0.871
		1.166	1.136	1.627	1.143	2.379	2.193	1.203	1.056	2.663	1.037
		1.151	1.065	1.987	0.754	1.19	2.132	1.148	2.266	2.372	1.478
		1.219	1.463	2.258	4.062	1.886	2.985	1.368	1.43	3.216	1.605
		1.675	1.476	1.447	2.461	1.494	3.188	2.087	1.034	1.662	0.948
		1.817	1.413	1.318	1.893	1.166	2.637	1.719	0.851	1.648	1.626
		2.549	1.064	1.111	0.913	2.705	1.316	0.812	1.177	2.847	0.809
		1.333	1.202	2.725	1.968	1.683	2.381	1.873	0.808	1.741	1.088
		1.071	1.489	1.125	2.267	0.925	2.653	1.617	1.211	1.175	1.15
		1.299	0.862	1.1	1.255	1.777	4.509	2.355	1.178	1.055	2.568
		0.807	1.181	1.798	2.397	2.386	1.087	1.544	1.401	1.62	2.66
		1.948	1.201	0.815	1.518	2.973	1.048	1.882	1.231	2.221	0.886
		1.518	1.1	0.982	1.109	1.893	1.103	1.343	0.668	1.848	0.769
		1.964	1.497	1.422	1.575	0.64	2.448	1.722	1.291	1.231	1.519
		1.254	1.444	1.269	2.65	1.195	3.052	0.719	1.25	1.929	2.158
		0.87	1.264	1.554	1.269	1.537	1.925	2.501	0.991	1.687	2.116
		1.566	1.219	1.018	1.017	1.187	2.252	1.873	1.314	2.053	0.88
		1.291	1.193	1.5	1.537	2.096	1.473	1.428	1.036	1.404	2.052
		1.197	1.349	1.185	1.287	1.002	3.592	1.56	1.096	2.178	0.584
		1.024	1.225	0.872	3.667	1.14	3.843	1.707	1.196	1.703	1.907
		1.088	1.522	0.821	2.574	2.135	2.411	1.059	1.16	2.854	1.862
		1.423	1.532	1.668	2.334	1.181	1.985	2.528	2.06	2.358	1.818
		1.242	1.232	1.225	2.279	1.436	3.332	1.832	1.035	1.792	0.853
		1.31	0.939	1.401	1.469	1.463	1.55	2.119	2.337	4.081	1.786
		1.403	0.809	1.18	2.789	1.266	2.128	2.006	1.16	0.902	1.413
		1.218	1.22	0.829	2.733	1.015	3.775	1.513	1.359	3.914	2.583
		0.903	0.886	0.796	1.044	1.4	2.461	1.903	0.909	2.177	0.69
		0.958	1.467	0.755	2.217	2.769	3.86	0.932	1.206	1.573	2.551
		2.383	1.057	0.779	2.093	0.809	3.216	1.487	1.217	1.35	1.937
		3.278	1.493	1.315	3.226	2.048	3.88	1.812	1.183	2.828	1.323
		0.806	1.056	1.304	1.63	1.911	1.611	1.298	1.016	2.349	2.38
		0.867	0.892	1.329	1.446	1.262	2.917	1.262	0.922	2.601	1.452
		0.635	1.196	1.364	1.774	1.691	4.026	1.7	3.079	3.992	1.63
		0.798	1.066	1.453	1.25	2.427	2.319	1.044	1.052	3.252	1.119
		1.12	1.427	0.936	3.165	2.24	2.079	1.195	2.044	1.172	2.102
		1.456	1.198	1.773	2.348	1.874	2.865	2.416	1.238	2.243	0.759
		1.204	1.199	1.391	1.609	3.989	2.488	2.186	0.74	1.533	1.171
		0.772	0.784	1.675	0.868	1.974	3.299	2.082	0.584	1.061	1.026
		1.175	1.131	1.481	1.949	1.89	1.004	1.337	1.003	4.483	0.796
		0.799	1.203	0.971	2.905	1.827	1.615	0.74	1.18	1.399	1.242
		1.566	1.172	1.038	3.242	2.012	0.789	0.64	1.143	1.921	3.383
		1.132	1.526	1.349	2.22	2.55	2.065	1.445	1.04	1.146	1.783
		1.683	1.283	1.309	2.355	1.944	1.279	1.683	1.299	1.178	3.15
		2.158	1.112	1.087	1.693	1.841	1.314	1.752	1.109	2.247	0.958
		1.088	1.031	0.704	2.197	1.029	1.229	1.153	1.088	2.445	3.279
		0.893	0.932	0.686	2.165	2.609	1.934	1.194	1.338	3.821	3.026
		1.306	0.833	1.519	1.984	2.259	0.908	1.478	2.044	3.383	1.332
		1.633	1.341	1.207	2.756	0.884	2.346	1.911	1.345	2.646	1.345
		2.76	1.109	1.982	2.021	1.696	2.397	1.076	3.353	1.225	2.304
		0.868	1.583	1.085	2.128	0.851	1.617	1.998	0.958	2.358	2.279
		1.304	1.285	1.331	2.231	4.539	1.534	1.312	1.426	1.024	1.735
		1.307	1.166	0.867	2.762	1.669	0.808	1.776	1.063	0.916	3.722
		0.859	1.317	0.762	2.951	1.669	3.19	2.377	0.674	1.156	3.007
		0.644	1.146	2.03	0.966	1.767	2.174	1.979	0.863	2.691	2.05
		0.587	1.468	1.177	2.745	1.277	2.458	2.659	0.802	2.461	1.836
		0.786	1.208	0.727	2.596	1.605	1.977	2.168	0.836	1.855	0.659
		1.037	0.942	1.328	1.909	0.575	1.202	1.066	1.367	2.763	0.898
		1.07	1.221	1.27	3.211	0.761	3.686	2.227	1.34	1.801	1.901
		1.381	1.043	0.987	2.737	1.634	4.644	2.118	1.453	2.045	1.645
		1.238	1.193	0.939	2.25	0.864	3.621	1.578	1.915	1.981	0.775
		1.477	1.524	1.2	1.461	3.133	3.454	2.283	1.556	1.465	1.911
		1.609	1.105	1.31	1.88	1.628	1.47	1.671	1.21	1.556	3.361
		1.338	1.088	1.461	2.672	1.491	3.436	1.735	0.98	0.898	2.163
		1.421	1.007	2.07	1.999	1.067	2.864	1.995	2.653	2.465	2.176
		1.275	1.213	1.35	1.817	2.316	2.18	1.922	1.47	1.21	2.518
		0.945	1.409	1.075	2.313	1.684	1.509	1.53	1.262	1.408	0.974
		1.232	1.022	2.188	2.183	0.922	3.767	1.927	0.843	1.993	1.211
		1.622	1.103	1.348	2.276	0.893	3.016	1.326	1.18	2.764	1.765
		1.759	1.399	1.275	2.542	0.867	1.852	1.765	1.473	3.012	4.399
		0.939	1.486	1.406	1.719	2.62	3.058	1.65	3.11	1.82	2.295
		1.121	1.295	1.068	2.256	1.974	0.873	0.716	0.9	0.863	1.152
		0.902	1.55	1.141	2.082	2.677	1.665	1.055	2.716	2.101	2.083
		0.954	0.754	1.147	2.465	1.696	3.109	2.615	1.356	1.471	0.894
		0.929	1.065	1.328	1.547	1.508	3.161	2.018	0.86	1.704	1.876
		0.795	1.017	1.367	2.316	1.242	2.323	1.796	1.335	1.349	2.545
		1.398	1.131	1.382	2.26	1.261	0.826	1.086	0.858	2.468	0.828
		1.319	1.009	0.411	0.905	0.732	3.657	1.277	1.504	1.866	2.091
		1.042	1.241	0.931	1.562	1.359	4.353	1.895	1.001	2.869	0.797
		1.071	1.6	1.288	2.782	1.037	0.804	1.685	0.985	3.331	1.294
		1.157	1.287	1.298	1.927	1.445	2.062	1.737	0.893	3.823	1.822
		1.111	1.182	1.704	2.085	2.705	1.932	1.704	1.682	1.994	1.167
		1.122	0.974	1.052	2.853	1.895	3.374	0.89	0.782	2.457	2.401
		0.766	1.5	1.08	1.566	2.929	3.114	1.496	1.624	1.785	1.904
		1.286	0.82	1.36	2.613	0.896	2.631	1.954	0.801	3.935	1.054
		1.175	1.186	0.843	2.482	0.83	2.129	2.405	1.205	1.692	0.758
		1.119	1.289	1.39	2.773	3.263	2.423	1.535	0.966	1.98	1.84
		1.01	2.847	0.981	2.433	1.178	2.59	1.132	1.139	0.768	2.465
		0.941	1.325	1.144	2.077	3.606	1.651	3.156	1.057	0.993	3.177
		1.59	1.907	2.422	1.689	0.736	0.999	1.209	0.926	1.254	2.907
		1.213	1.873	1.167	2.683	0.698	2.803	1.752	1.186	3.237	2.665
		0.88	1.194	1.303	2.529	1.245	2.393	1.566	1.039	1.678	2.34
		1.254	0.733	1.491	3.031	1.184	3.15	1.483	1.405	2.009	1.636
		1.173	1.434	0.91	2.261	1.059	1.539	1.026	1.108	2.061	1.038
		1.039	1.516	1.468	2.195	1.528	2.464	2.434	0.685	2.66	2.689
		1.427	1.308	1.761	1.344	1.029	0.755	1.086	1.105	3.129	1.354
		1.441	2.373	1.469	1.491	2.181	3.198	2.164	2.599	2.221	1.503
		1.538	1.193	1.83	2.137	3.138	2.512	2.011	1.186	2.639	2.449
		0.827	1.016	1.518	2.164	1.838	2.777	1.363	1.113	2.516	1.438
		1.178	2.126	0.945	2.458	2.549	3.163	0.756	1.158	0.694	2.663
		0.813	1.837	1.121	2.691	2.026	0.771	1.627	0.858	1.568	0.948
		1.169	1.167	0.973	1.754	2.13	2.568	1.936	1.079	1.326	1.28
		1.35	1.393	1.076	1.524	2.171	0.855	0.688	0.882	2.359	1.15
		1.444	1.063	1.395	2.177	1.851	2.464	1.872	1.044	1.067	1.521
		1.129	1.184	0.991	1.31	1.408	3.323	1.164	1.024	2.467	3.1
		1.241	0.994	0.983	2.85	2.602	2.365	0.958	1.15	1.631	1.879
		1.71	1.003	1.362	2.631	2.59	2.774	1.911	0.646	1.39	1.11
		1.073	1.288	1.072	2.475	1.567	2.389	2.11	1.284	1.307	0.969
		1.816	1.102	1.619	1.308	2.75	2.749	1.725	1.008	2.467	2.318
		1.51	0.674	1.389	2.482	1.878	2.531	1.631	2.944	3.753	1.612
		1.073	0.721	1.26	0.905	1.489	2.866	1.383	2.627	2.894	2.46
		1.128	0.84	1.262	1.695	2.342	1.768	1.474	1.409	2.915	2.046
		1.234	1.187	0.98	2.371	1.46	3.573	1.047	1.343	0.72	1.24
		1.271	1.31	1.548	1.901	3.077	2.819	2.408	1.373	1.924	1.869
		1.107	1.012	0.985	0.872	0.965	3.519	1.904	1.062	2.873	2.333
		1.314	1.275	1.654	2.364	1.219	0.655	2.154	1.07	1.857	1.558
		1.252	1.506	1.552	1.487	1.424	2.793	1.877	0.544	1.131	1.94
		0.835	1.16	1.002	1.17	1.577	3.061	1.968	2.085	3.462	2.717
		0.722	1.013	1.053	0.74	2.3	3.197	1.731	1.264	1.693	2.377
		1.525	1.353	1.255	1.365	1.801	1.212	1.668	0.691	2.397	1.465
		1.493	1.52	1.034	2.56	1.385	3.483	1.821	1.495	2.549	2.46
		0.663	1.248	1.372	2.215	4.121	3.057	1.765	0.826	3.467	3.787
		0.825	0.833	1.133	1.682	1.176	3.432	2.446	0.922	1.798	3.956
		0.976	1.053	1.571	2.756	1.773	3.726	1.676	0.887	2.428	1.362
		0.7	1.107	1.154	2.807	1.042	3.114	1.716	0.84	2.516	2.793
		0.966	1.349	1.534	2.559	1.574	2.817	1.481	0.982	1.775	1.742
		0.592	1.479	2.058	0.842	2.396	3.785	1.66	1.019	1.663	2.018
		0.894	1.182	1.521	1.464	1.24	1.24	1.541	0.753	2.529	0.928
		0.895	0.792	1.142	1.675	1.408	2.274	2.497	1.255	2.785	1.457
		0.759	1.381	1.392	2.277	1.411	2.12	1.386	1.389	2.996	0.813
		0.795	1.355	1.023	1.475	1.656	1.51	0.925	0.883	1.788	1.078
		1.346	1.289	1.578	1.998	1.533	2.097	1.713	0.951	4.28	2.31
		0.747	0.842	1.729	0.494	2.696	2.202	1.489	0.986	3.612	1.689
		0.846	1.374	3.387	1.778	1.051	3.627	1.539	0.712	2.389	1.794
		0.75	1.399	1.247	3.063	3.16	1.367	2.213	0.805	1.89	1.456
		1.61	1.342	1.187	2.531	2.577	2.231	1.381	1.012	2.372	0.847
		1.179	1.085	1.228	2.121	2.911	2.301	1.506	1.013	1.215	2.03
		1.826	0.846	1.005	2.241	0.974	0.923	1.556	1.566	2.832	1.268
		0.679	0.865	1.26	1.823	1.858	2.325	1.938	1.05	1.499	1.526
		1.827	1.361	1.372	4.548	0.604	2.83	1.883	1.1	3.294	2.456
		1.104	1.229	1.572	2.784	1.749	2.559	1.455	0.815	1.763	1.853
		1.129	1.19	1.016	0.834	2.054	1.92	1.753	1.038	2.972	2.422
		1.164	1.112	1.512	2.791	1.286	2.274	1.708	0.969	2.468	1.717
		1.522	0.87	1.87	1.691	3.279	2.18	1.903	1.173	3.001	1.219
		1.294	1.416	1.175	2.581	3.021	1.624	2.144	0.661	1.746	0.847
		1.743	1.748	1.28	1.608	2.268	0.936	2.2	1.123	3.434	1.437
		1.545	1.305	1.19	0.9	2.254	1.323	1.513	0.757	3.043	1.116
		1.688	1.934	1.647	1.619	2.876	1.742	1.392	0.89	2.532	1.161
		0.875	1.337	1.393	2.147	1.353	4.447	1.743	0.752	1.061	1.478
		1.436	1.422	1.271	2.023	1.463	1.947	2.122	0.982	1.967	0.648
		0.908	0.993	1.392	2.295	3.505	2.106	0.939	1.537	1.716	3.869
		0.923	1.388	1.431	2.554	3.231	2.469	1.439	0.998	2.821	2.581
		1.256	1.211	0.95	2.668	2.143	0.828	0.852	1.77	2.031	2.069
		1.438	1.222	1.31	1.599	1.556	3.671	1.986	1.583	1.288	2.359
		1.541	0.925	1.384	1.513	2.091	1.918	2.027	1.278	0.915	3.045
		1.501	1.155	1.233	2.018	2.266	2.962	1.514	0.968	0.629	3.101
		1.374	0.984	1.315	1.356	0.807	3.109	1.861	1.063	1.601	1.524
		1.291	1.176	0.565	0.504	1.748	2.889	0.843	2.09	0.865	2.478
		1.219	1.285	1.32	2.521	2.857	2.899	1.451	1.887	1.563	2.093
		1.539	1.372	1.231	2.217	1.985	2.761	1.199	1.095	1.143	1.05
		1.291	1.009	1.163	2.117	1.578	2.325	1.312	1.07	1.132	2.102
		1.344	1.323	2.421	2.609	1.603	1.15	1.312	1.571	0.912	0.89
		0.963	0.973	1.852	2.172	2.432	2.976	1.2	0.998	0.894	1.671
		0.745	0.935	1.183	1.582	0.566	1.455	1.55	1.333	1.273	2.377
		0.999	0.842	1.297	1.663	2.79	1.437	1.212	1.276	1.278	0.815
		0.923	1.307	1.131	1.397	3.645	1.854	2.116	0.96	2.022	1.297
		1.034	1.42	1.443	1.622	0.963	2.788	1.296	1.442	0.79	1.528
		1.4	1.244	1.456	2.141	1.391	4.213	1.09	1.075	1.328	2.115
		1.193	1.358	1.907	1.425	1.355	3.722	1.134	1.484	1.89	1.343
		1.214	1.463	1.53	1.208	3.24	3.237	1.581	0.752	2.022	0.997
		0.823	0.893	0.981	2.123	3.87	1.446	1.568	1.162	0.837	2.565
		1.178	1.436	1.307	1.661	1.918	1.837	0.612	1.19	1.505	1.959
		1.525	0.871	2.585	1.934	3.781	3.112	1.463	1.331	1.547	2.122
		1.039	1.23	1.251	2.883	1.128	2.004	1.22	0.893	1.017	1.391
		1.026	1.175	1.217	1.662	1.319	2.83	0.971	1.255	1.922	2.839
		1.278	0.944	1.409	2.424	2.82	1.882	1.023	1.043	1.475	2.184
		1.499	1.551	1.272	1.43	0.774	2.109	2.442	0.593	2.604	2.826
		0.99	0.873	0.735	2.524	2.439	2.99	1.132	1.126	1.418	1.02
		1.43	1.027	1.443	1.348	2.59	2.742	1.521	1.213	1.179	1.091
		1.355	0.952	1.104	1.199	1.65	1.66	1.43	0.853	2.809	2.12
		0.687	1.89	1.764	2.608	2.039	2.323	1.384	1.03	0.842	2.854
		1.469	1.313	0.885	0.889	1.196	2.963	0.747	1.496	1.054	2.159
		0.956	0.733	1.467	2.529	1.322	2.054	1.948	0.506	1.216	3.038
		1.067	0.739	0.635	2.417	1.013	3.097	1.182	1.093	1.977	2.382
		1.252	1.06	1.379	1.884	1.728		1.412	1.057	1.583	1.368
		1.46	1.427	1.311	2.36	2.074		0.841	1.079	2.084	2.909
		1.408	1.288	1.232	1.213	3.421		1.331	1.01	1.381	2.279
		1.256	1.11	1.611	2.42	2.528		1.137	1.639	2.025	2.599
		0.703	1.116	1.622	1.728	3.622		1.62	0.957	2.749	2
		1.24	1.252	1.346	2.544	1.443		1.63	1.155	2.125	1.946
		1.24	1.082	1.428	2.892	1.215		0.926	0.9	1.199	1.792
		1.299	1.256	1.581	2.537	1.299		1.217	1.195	1.34	1.566
		1.022	0.876	1.258	2.381	2.267		0.745	1.162	1.128	2.474
		1.263	3.087	0.998	1.876	2.298		1.394	1.331	1.751	1.304
		1.866	1.01	1.339	2.509	1.132		1.625	1.417	2.432	1.604
		1.502	1.271	1.282	2.049	2.218		1.659	1.446	2.479	2.441
		1.169	2.007	1.081	2.356	1.564		1.761	0.99	1.606	1.017
		0.863	0.627	1.528	4.056	2.44		1.425	1.028	1.559	2.612
		1.198	1.27	1.711	3.109	2.272		1.298	0.684	3.141	1.859
		0.891	1.465	1.143	2.15	1.62		0.845	1.131	3.202	1.759
		1.684	0.954	1.211	2.583	2.721		2.128	1.358	1.934	1.952
		1.388	1.562	1.375	2.216	5.208		1.571	1.326	1.052	2.065
		1.438	1.546	1.276	2.598	1.992		2.111	1.356	2.932	1.586
		1.159	1.459	1.033	2.624	1.467		0.92	0.963	2.961	1.403
		1.019	1.385	1.506	2.347	2.094		1.863	2.021	2.08	0.681
		1.304	0.959	1.039	2.629	1.379		2.104	1.275	2.291	0.996
		1.303	1.496	1.179	0.514	1.587		1.496	0.911	2.134	0.833
		1.111	1.561	3.891	1.669	0.861		1.732	1.164	2.056	1.28
		0.866	1.156	2.668	1.477	1.651		1.529	2.014	2.999	1.411
		2.033	1.089	1.322	2.136	1.512		1.212	2.629	2.312	1.581
		0.901	2.058	1.331	1.86	0.664		1.418	1.195	2.89	2.983
		1.574	0.913	1.475	2.384	1.084		1.876	2.096	1.581	3.463
		1.102	0.797	1.21	1.582	0.924		1.981	1.268	1.597	2.606
		1.002	1.491	1.469	1.058	2.437		2.146	0.999	1.667	2.022
		1.178	1.592	1.027	0.957	2.068		1.365	1.102	1.282	2.24
		1.189	1.3	1.177	2.641	2.176		1.361	1.04	1.235	1.552
		1.402	0.983	1.229	2.629	1.017		1.482	1.128	1.312	2.811
		0.768	1.006	1.61	1.49	4.741		1.766	1.155	0.899	3.831
		0.83	1.16	1.842	2.455	0.939		1.345	0.98	3.197	2.065
		1.214	1.137	1.157	2.245	1.448		1.127	0.842	2.061	1.494
		0.698	1.301	0.991	3.121	2.028		0.974	1.38	1.81	1.819
		1.611	0.991	1.429	0.926	3.354		1.514	1.514	1.84	1.541
		1.196	1.531	1.435	1.329	1.308		1.81	1.186	2.207	2.402
		1.064	1.346	1.188	1.642	0.833		1.541	1.465	1.356	3.314
		0.946	1.227	0.902	1.329	0.961		1.294	1.379	1.916	0.699
		1.43	1.365	1.332	2.324	1.969		1.569	2.244	0.651	1.916
		1.007	1.391	1.518	2.153	1.757		1.429	0.743	1.653	1.502
		0.875	1.435	1.072	1.815	1.039		1.272	1.031	0.631	2.327
		1.109	1.155	1.109	2.455	0.945		1.65	1.197	1.225	1.326
		1.237	0.992	0.927	1.593	1.722		0.744	1.266	0.828	1.058
		1.962	1.991	1.853	1.813	0.917		1.485	1.118	0.937	3.104
		1.361	1.08	1.312	1.833	1.983		1.743	1.079	1.103	2.306
		1.84	0.813	1.273	1.971	2.077		1.913	3.227	1.28	2.406
		1.684	1.223	1.522	1.058	2.181		0.693	1.331	3.422	3.109
		1.599	1.18	1.53	1.708	2.425		1.345	1.152	1.344	2.511
		0.912	1.682	1.056	1.697	1.382		0.998	0.882	2.499	3.42
		1.187	1.482	0.753	2.424	1.932		1.163	1.26	1.745	2.923
		1.453	1.479	1.422	2.352	1.895		1.241	1.05	2.8	1.539
		1.381	1.599	1.326	2.935	3.049		2.217	1.051	1.622	3.111
		1.508	0.993	0.762	2.79	2.616		0.824	1.08	1.55	2.477
		0.975	1.045	1.381	2.101	1.33		1.13	1.941	1.638	1.256
		1.386	1.154	2.228	1.717	1.336		1.576	2.495	1.839	1.735
		0.966	1.444	1.244	1.458	2.375		1.452	1.721	2.37	2.879
		1.181	1.314	0.981	1.012	1.795		1.496	0.852	3.049	2.275
		1.017	1.363	1.285	1.182	1.438		1.193	1.099	3.109	1.843
		1.406	0.696	1.254	2.5	3.015		1.255	1.191	1.414	2.012
		1.059	0.815	0.905	0.539	0.865		1.156	1.429	3.444	2.18
		1.031	0.714	1.158	2.181	0.763		1.322	1.306	1.432	2.559
		1.196	1.343	1.289	1.789	0.954		1.998	0.879	1.658	3.656
		0.865	1.261	0.939	1.452	1.18		1.969	1.019	1.954	1.926
		1.355	1.055	0.823	2.401	1.844		1.04	0.982	1.515	1.528
		1.596	0.81	0.837	1.135	1.759		0.967	1.178	1.113	2.888
		1.128	1.363	0.836	2.35	2.193		1.913	1.207	1.345	2.534
		1.498	1.543	1.535	2.724	2.623		0.645	1.091	2.452	2.313
		1.38	1.336	1.679	2.342	2.629		1.654	0.983	2.832	2.858
		0.771	1.612	1.518	2.591	1.589		0.715	1.069	2.855	2.464
		0.878	1.363	1.268	1.854	2.99		1.287	1.115	3.326	2.812
		0.727	1.356	1.199	1.913	1.062		1.326	0.874	1.317	1.246
		1.505	1.299	1.273	1.379	2.077		0.99	0.996	1.634	2.348
		1.174	1.095	2.72	1.796	2.289		1.6	1.296	0.922	2.487
		0.897	1.339	1.369	1.942	2.72		1.01	1.483	1.923	2.933
		1.165	2.777	1.23	2.066	3.326		1.127	0.952	1.09	1.906
		1.175	1.267	1.224	2.084	1.383		0.882	1.061	2.646	2.727
		0.877	1.274	0.819	0.943	0.995		1.407	0.872	2.371	1.105
		1.008	1.233	0.832	2.67	2.443		1.043	1.32	2.058	4.136
		1.173	1.282	0.939	1.029	2.375		1.326	0.903	2.239	0.897
		2.168	1.507	3.896	1.433	1.935		0.914	0.805	1.828	2.779
		2.112	1.326	1.308	1.614	2.779		1.511	0.774	2.392	3.98
		1.268	1.342	1.223	2.022	1.566		1.51	0.862	2.788	2.557
		1.255	1.039	1.288	1.843	1.774		1.323	1.165	2.353	4.011
		0.808	0.963	1.748	1.154	2.335		1.235	1.281	1.395	1.044
		1.03	1.945	1.1	2.173	2.841		1.476	1.05	1.842	2.492
		1.194	1.302	1.179	2.029	2.17		1.627	1.098	2.598	3.538
		1.462	1.508	1	1.252	2.493		1.233	0.79	1.606	2.344
		1.041	1.16	1.754	1.49			1.231	1.119	2.962	2.923
		1.122	1.487	1.117	3.578			1.035	0.939	2.317	3.803
		1.076	1.005	0.807	1.463			0.961	0.832	2.026	1.963
		1.436	1.07	0.841	0.979			1.241	1.123	2.764	2.102
		1.397	1.286	1.121	2.976			1.363	1.127	2.393	2.487
		1.306	1.599	1.209	1.549			2.016	1.435	1.591	2.683
		1.226	0.971	1.503	2.824			1.094	1.295	1.725	2.891
		1.135	1.826	1.138	2.292			1.007	1.125	2.017	3.904
		1.187	2.144	1.403	2.249			1.643	1.202	1.155	2.327
		0.815	1.88	1.166	2.126			1.383	0.694	1.167	1.922
		0.849	1.454	0.932	1.959			0.927	1.32	1.635	2.337
		1.067	1.272	1.223	3.054			1.628	0.989	1.681	3.275
		0.636	1.158	0.623	2.507			1.664	1.171	3.12	1.656
		1.751	1.853	1.5	2.164			1.31	1.252	2.752	2.151
		1.362	1.071	1.489	2.733			1.346	1.726	0.922	0.667
		1.441	1.329	1.427	2.217			1.824	0.655	2.373	1.435
		1.018	1.226	1.296	3.444			1.44	0.976	1.245	3.393
		1.602	1.123	1.533	2.759			1.551	0.837	2.6	4.205
		1.259	1.536	1.507	1.299			1.583	1.221	2.358	3.553
		0.878	1.296	1.026	1.093			1.516	1.337	2.774	4.833
		1.171	2.604	0.995	3.197			0.989	1.071	3.013	2.854
		0.92	1.587	1.286	2.996			1.334	1.806	1.156	1.87
		1.418	1.322	1.52	2.908			1.462	0.949	0.814	2.215
		1.254	1.411	1.205	2.383			1.483	1.472	1.835	2.669
		1.62	1.136	0.663	2.394			1.889	1.1	2.202	3.124
		1.151	1.112	1.417	1.81			0.874	1.137	2.682	2.069
		1.914	1.044	1.474	2.519			1.593	1.009	1.909	0.966
		1.569	1.356	1.241	1.387			1.353	1.045	2.612	2.49
		1.054	1.19	1.313	2.417			1.932	1.178	0.963	1.059
		1.09	1.301	1.206	2.615			1.303	1.096	1.858	1.547
		1.335	1.374	1.313	2.162			1.481	1.07	1.087	3.344
		1.334	1.152	1.446	2.099			1.067	0.614	0.722	3.274
		0.945	1.369	1.33	2.237			1.718	1.178	1.06	2.1
		0.835	1.242	1.475	2.556			1.412	1.53	3.808	1.68
		1.15	1.369	1.492	2.454			1.738	1.05	2.955	0.946
		0.848	1.431	1.393	1.178			2.353	1.637	1.448	2.832
		1.249	1.191	1.372	2.002			1.321	1.166	2.43	1.213
		1.334	1.272	0.98	1.78			1.029	1.046	2.113	1.907
		1.188	1.436	0.912	2.527			2.137	2.638	3.875	1.831
		0.947	1.273	2.4	1.597			1.676	1.155	2.379	2.977
		0.716	0.833	0.772	1.85			1.332	0.959	3.767	1.108
		1.342	1.345	1.487	1.667			2.256	0.935	2.474	0.713
		1.292	1.261	1.17	3.238			1.689	1.51	2.927	1.316
		1.246	1.416	1.253	1.686			1.792	1.01	2.177	1.408
		1.567	1.329	1.464	1.398			2.084	1.467	3.066	1.095
		2.221	1.223	1.494	1.405			1.391	1.031	2.146	2.234
		1.17	0.951	1.806	1.615			1.882	0.917	1.713	3.766
		1.118	1.378	1.632	1.895			2.545	1.314	1.857	2.553
		1.168	1.792	0.573	1.222			1.213	1.022	2.637	1.379
		0.765	1.792	1.241	1.13			1.019	0.656	2.762	3.52
		2.664	1.698	0.955	0.802			1.599	2.277	1.804	2.707
		1.234	1.232	1.299	1.866			1.848	1.247	1.991	0.821
		0.679	1.339	1.714	1.663			1.605	0.936	1.776	1.098
		1.223	1.634	1.727	1.561			0.925	1.234	2.977	3.17
		1.342	1.006	1.378	0.962			1.578	0.889	2.905	1.338
		1.588	0.95	1.385	1.803			1.361	1.378	2.249	2.199
		1.593	1.164	1.251	1.758			1.23	0.985	1.632	1.058
		1.337	1.087	1.493	2.43			1.457	1.357	2.554	0.729
		1.037	1.659	1.278	2.919			1.766	1.437	2.491	2.706
		1.415	1.019	1.054	1.747			1.139	1.32	0.965	2.337
		1.383	1.497	1.441	2.183			2.374	1.288	2.413	0.942
		1.018	1.459	1.329	2.352			1.332	0.718	2.866	1.21
		0.818	1.057	1.181	2.382			2.006	1.188	3.004	1.863
		2.625	1.207	1.282	2.185			1.273	1.235	2.8	1.299
		1.286	1.325	0.914	2.557			1.276	1.165	3.15	1.354
		1.64	1.129	1.212	1.148			2.185	1.208	2.436	2.275
		0.996	1.377	1.088	2.807			1.651	1.241	0.667	0.781
		1.061	1.287	1.281	2.269			1.062	1.322	2.264	0.96
		0.708	0.87	1.252	1.924			1.459	1.054	3.162	1.853
		1.958	1.624	0.834	1.132			1.012	1.157	2.246	1.527
		1.602	1.367	0.842	0.728			1.362	1.379	2.794	3.604
		2.682	0.852	1.071	2.037			1.493	1.15	1.443	2.399
		1.151	1.05	1.411	2.448			0.941	1.017	3.298	1.281
		2.096	0.717	1.174	3.262			1.191	1.447	3.105	1.778
		1.111	1.122	1.027	3.119			1.305	1.37	2.173	2.387
		1.028	1.369	1.119	1.609			2.846	1.081	1.686	2.474
		1.474	0.912	1.254	2.268			2.176	1.032	1.073	0.919
		0.99	1.331	1.288	1.62			2.189	0.974	1.296	1.241
		1.418	1.079	1.102	2.071			1.472	0.706	1.91	1.127
		0.727	1.357	1.046	1.851			1.174	1.003	2.604	3.751
		1.429	0.838	1.58	1.02			2.127	0.836	1.315	3.219
		1.213	0.884	1.442	1.318			1.699	1.107	3.15	3.567
		0.821	1.524	1.21	2.632			2.129	0.686	2.129	1.319
		1.061	0.786	1.477	1.646			1.04	1.015	2.341	3.105
		1.307	1.3	1.642	2.428			1.096	0.79	1.377	1.111
		1.187	1.012	0.931	2.989			1.475	3.636	1.834	0.953
		1.052	1.127	0.97	1.453			1.62	0.928	2.302	1.264
		1.213	1.865	1.596	2.675			1.119	1.015	2.14	0.743
		1.181	1.241	0.888	2.398			1.441	0.828	1.641	0.993
		1.098	1.661	1.172	1.388			1.611	1.29	1.396	0.752
		1.904	1.298	1.262	3.257			1.261	1.289	2.848	1.112
		1.605	0.711	1.443	0.959			1.46	1.162	1.755	1.793
		1.393	2.794	0.903	1.252			1.259	0.979	1.095	1.177
		1.598	1.352	1.444	1.861			1.122	1.129	2.881	2.236
		0.866	1.914	1.261	1.601			1.926	0.721	3.43	3.027
		1.231	0.946	1.308	1.739			1.871	0.991	1.882	2.687
		1.33	1.554	1.436	2.293			1.637	0.974	2.486	2.027
		1.074	2.952	0.906	1.722			0.802	1.154	0.747	2.136
		1.478	0.931	1.257	1.834			1.356	0.662	3.592	2.272
		0.686	1.22	1.231	1.696			1.129	1.699	2.542	3.287
		2.497	1.418	0.945	1.566			1.046	2.047	2.249	2.79
		1.088	1.36	1.107	2.378			1.058	1.211	1.869	0.743
		0.82	1.241	1.403	2.339			1.59	1.485	1.211	1.69
		1.372	1.092	1.583	2.242			1.023	1.171	2.436	0.88
		1.075	1.426	2.753	1.87			1.224	1.539	1.868	1.732
		1.064	1.659	1.359	1.68			1.6	0.775	2.543	2.168
		1.385	0.878	1.066	1.895			2.108	1.158	1.888	0.758
		1.105	1.696	1.3	1.744			1.884	1.257	1.15	2.268
		1.684	1.188	1.145	2.886			1.624	1.794	2.01	0.782
		1.301	1.341	1.352	3.274			1.162	1.544	2.381	1.133
		0.885	1.189	1.682	1.262			1.419	1.249	2.397	1.334
		1.725	1.143	1.056	1.534			1.293	0.885	1.555	2.427
		2.569	1.517	0.872	2.296			1.357	1.254	2.164	2.146
		1.208	1.619	2.976	2.113			1.404	1.431	2.082	1.795
		0.908	1.294	1.857	1.086			1.039	2.471	2.232	1.145
		1.965	1.561	0.723	1.853			1.746	1.071	2.495	1.03
		1.091	1.477	1.591	2.859			0.945	1.021	4.309	2.334
		1.256	1.599	1.555	0.76			1.489	1.751	2.205	1.265
		1.231	1.913	1.354	2.338			1.042	1.302	1.735	1.176
		1.192	1.604	1.185	2.68			1.96	1.271	2.073	1.204
		1.1	1.149	1.213	1.071			1.861	2.127	1.556	0.631
		0.853	1.164	0.883	0.986			1.351	0.853	1.787	2.496
		0.732	1.48	1.27	2.839			1.827	1.333	2.197	1.029
		0.832	1.561	1.519	1.147			1.778	0.827	2.55	2.445
		1.073	1.04	1.071	1.646			2.044	1.147	2.557	2.03
		0.936	1.327	1.533	1.293			1.166	1.038	2.687	1.238
		0.815	1.493	1.309	1.477			1.903	1.071	1.143	2.507
		1.062	1.327	0.678	0.807			2.063	0.868	1.339	1.748
		1.191	2.066	0.997	2.971			1.065	0.849	0.959	1.92
		1.086	4.04	1.684	2.276			1.914	0.88	3.215	1.641
		1.372	1.778	1.733	1.969			1.125	1.051	1.146	1.089
		0.9	1.372	1.291	2.493			2.245	1.139	1.631	1.74
		1.733	1.192	1.725	2.065			1.551	1.113	1.685	0.972
		1.271	1.088	0.967	2.367			1.604	1.216	1.031	2.964
		1.063	1.493	1.439	2.916			0.824	1.328	2.711	2.203
		1.112	1.765	1.515	2.824			1.586	1.116	1.361	1.537
		0.998	0.803	1.525	3.07			1.339	1.137	1.357	1.257
		0.904	1.443	1.137	2.442			1.3	1.268	1.932	1.631
		1.399	1.594	0.705	2.697			1.909	2.892	1.632	1.207
		1.534	1.659	1.244	3.043			1.52	1.191	2.853	0.984
		1.832	1.443	1.387	2.193			1.043	1.242	2.697	1.554
		1.208	1.69	1.663	0.656			2.051	1.168	1.415	1.261
		1.973	1.24	0.855	0.966			1.74	1.411	1.912	1.207
		1.529	1.45	1.265	0.851			0.821	1.254	2.712	2.121
		1.719	1.349	1.005	1.896			1.849	1.485	2.086	1.829
		1.225	1.455	2.257	2.509			1.029	1.473	1.804	0.641
		2.043	1.727	1.741	1.602			1.59	1.238	2.506	1.508
		0.801	1.949	1.148	3.335			1.146	0.995	2.274	1.315
		1.121	0.902	1.021	3.096			2.016	1.084	3.152	1.104
		1.186	1.79	1.064	3.006			1.533	1.24	2.62	2.204
		1.029	1.093	1.317	2.119			1.313	1.19	2.205	1.599
		1.088	0.804	1.178	0.861			1.087	1.22	1.413	1.345
		1.283	1.658	1.139	2.989			1.446	0.863	2.816	0.974
		1.508	2.678	1.036	2.752			1.188	3.204	1.965	1.066
		1.252	1.134	0.996	2.006			1.284	1.229	1.643	1.603
		1.238	1.518	1.104	1.72			1.115	0.788	2.801	1.787
		1.648	1.495	1.763	4.343			0.692	0.601	2.886	1.631
		1.093	1.22	1.467	3.048			1.484	1.358	1.603	1.197
		1.773	1.306	1.478	4.063			1.861	1.404	1.748	1.591
		1.322	1.357	1.059	1.471			2.106	2.373	1.725	1.42
		1.245	1.355	1.416	1.658			1.054	2.429	2.662	2.283
		1.488	1.196	2.258	1.35			1.709	1.367	1.5	2.108
		1.272	1.274	0.732	1.155			2.336	1.461	3.209	2.183
		0.971	1.521	1.059	2.122			1.849	1.116	1.413	0.993
		1.033	1.22	1.279	1.833			1.599	0.828	2.261	2.171
		1.432	1.314	1.18	1.828			1.624	1.083	2.244	1.092
		3.202	1.096	1.034	2.015			1.876	1.05	3.744	2.719
		0.926	1.257	0.94	1.385			0.779	1.143	1.949	0.913
		0.881	1.366	1.203	1.824			1.561	1.284	3.547	1.219
		1.15	1.232	0.628	1.713			1.85	1.214	3.376	2.464
		1.264	1.705	1.322	0.656			2.352	0.981	2.138	1.496
		1.31	2.103	1.485	2.133			0.744	1.702	1.566	1.504
		1.377	1.099	1.259	1.489			1.882	1.55	1.806	1.091
		1.388	1.112	1.135	2.175			1.869	1.256	1.581	0.713
		1.087	1.831	0.911	2.381			2.52	1.271	1.88	0.849
		0.891	0.997	1.318	2.582			2.549	0.984	1.809	0.831
		1.365	1.241	1.232	2.083			0.769	0.954	1.977	1.788
		1.396	1.207	1.442	2.252			1.168	1.177	2.795	1.023
		1.134	1.216	1.057	2.449			1.345	0.874	1.796	0.966
		1.25	1.395	1.448	2.117			1.667	1.145	1.498	2.515
		1.257	1.472	1.241	2.466			1.839	1.312	2.72	1.409
		1.27	1.064	1.348	1.39			1.619	1.5	1.688	3.41
		1.198	1.864	1.362	1.252			1.478	0.961	0.997	1.937
		1.166	1.217	1.272	2.789			1.379	1.21	1.828	1.541
		1.224	1.213	0.742	2.131			0.954	1.541	2.008	1.724
		1.247	0.802	1.615	2.131			1.907	1.557	1.522	1.307
		1.249	1.22	0.906	1.156			1.9	0.916	2.669	1.403
		1.041	1.098	1.206	1.135			1.249	1.122	1.469	1.373
		2.189	1.123	2.245	1.958			1.566	1.093	1.756	1.539
		1.3	1.695	1.314	2.03			1.718	1.27	0.799	1.479
		1.483	1.457	1.122	2.168			1.439	0.883	1.336	0.865
		1.332	2.223	1.542	1.929			2.327	1.258	1.458	1.896
		1.193	1.854	1.625	1.481			2.396	0.789	1.3	1.705
		0.966	1.608	0.558	1.157			0.806	0.958	1.973	2.577
		1.127	0.88	1.628	1.294			1.68	0.985	3.026	1.491
		1.264	1.299	1.141	1.262			2.296	1.514	1.646	2.11
		0.97	1.027	1.175	1.236			2.384	1.223	2.178	1.453
		1.156	1.046	1.339	1.365			2.361	1.615	1.552	1.293
		0.746	1.366	1.5	1.676			2.58	0.987	1.914	1.074
		1.052	1.341	1.839	1.457			1.828	1.033	1.26	2.417
		0.822	3.594	1.183	0.914			2.398	1.183	2.336	1.486
		0.979	1.44	1.572	1.427			1.815	1.218	1.529	1.086
		0.567	1.186	1.278	1.157			0.892	1.279	3.78	1.591
		2.738	1.614	1.322	1.76			1.658	0.883	2.21	3.174
		1.365	1.539	1.448	1.634			1.86	0.766	0.693	2.677
		1.427	1.177	1.092	0.656			1.036	0.909	2.941	2.795
		0.977	1.104	2.003	1.176			1.611	0.561	2.984	1.984
		1.303	1.249	2.009	0.975			2.523	1.011	0.898	1.078
		1.479	1.51	1.194	1.822			1.352	1.284	2.028	0.85
		1.675	0.681	1.135	2.648			1.036	1.645	3.811	1.033
		1.407	1.095	1.364	1.394			2.85	1.29	3.577	3.281
		1.313	1.939	1.082	0.593			2.632	3.037	1.207	1.671
		0.851	2.389	1.131	0.956			1.643	1.075	1.778	1.944
		2.142	1.76	1.075	1.179			1.47	1.479	1.878	1.847
		1.051	1.339	1.798	1.221			1.831	0.895	2.355	1.876
		0.833	1.065	1.247	1.162			2.309	0.854	2.366	1.767
		1.201	1.614	1.771	2.517			2.011	1.251	2.443	1.635
		0.931	1.287	1.249	1.185			0.927	1.454	0.894	1.71
		1.338	1.275	1.326	2.821			2.478	1.098	2.446	2.139
		1.45	0.767	0.929	2.382			1.073	0.888	3.589	1.866
		1.102	1.101	1.376	2.074			1.388	0.558	2.253	2.466
		1.367	1.241	1.828	1.869			1.134	1.238	1.232	3.768
		1.42	0.885	1.089	1.257			1.947	1.002	1.986	1.342
		1.101	1.576	1.074	2.65			1.041	1.093	0.979	3.35
		1.269	1.594	2.439	2.021			1.51	1.011	3.167	1.875
		1.351	1.169	2.83	2.562			0.979	1.397	1.325	0.976
		0.804	0.907	1.516	2.009			2.184	1.318	1.991	2.205
		1.106	1.037	1.043	1.901			1.791	0.914	2.513	2.708
		1.154	1.026	1.196	0.962			2.114	1.143	1.616	0.919
		0.964	1.3	1.649	1.668			1.719	1.284	2.488	1.986
		1.209	1.725	1	1.329			1.263	1.051	2.615	1.742
		0.729	1.348	1.233	1.926			1.367	1.406	2.443	1.831
		0.812	1.934	1.875	1.469			1.31	0.774	1.249	1.006
		1.274	1.486	1.141	1.569			1.69	0.981	1.677	1.169
		1.312	1.511	0.694	2.147			1.638	1.321	1.382	2.561
		2.739	1.334	1.17	2.401			2.243	0.924	1.229	1.661
		1.24	1.343	1.653	2.013			2.679	1.161	2.289	1.288
		1.409	2.031	1.454	2.036			2.528	1.552	1.006	1.5
		1.193	1.251	1.705	4.7			2.001	1.319	2.803	0.877
		1.09	1.392	1.279	1.926			2.347	1.17	1.548	1.744
		1.166	1.797	1.268	2.455			2.334	1.407	1.177	1.462
		1.812	1.585	1.657	2.748			2.509	1.163	1.057	2.734
		0.861	0.949	1.33	1.761			2.082	1.879	2.453	1.604
		1.304	1.615	1.672	1.971			1.925	2.516	1.366	1.614
		0.835	0.93	0.952	2.102			1.388	1.132	3.034	1.853
		1.218	1.458	0.899	0.85			1.637	0.949	3.174	1.473
		1.638	0.946	1.423	0.74			1.302	0.747	2.633	1.947
		0.946	1.041	1.524	1.1			1.704	1.331	2.844	1.849
		1.444	2.152	1.527	2.402			1.595	0.816	1.42	0.892
		0.988	1.395	1.359	1.032			1.116	1.064	2.506	1.772
		1.176	1.191	1.118	2.293			2.029	1.25	1.241	1.774
		1.602	1.315	1.198	3.225			2.549	0.765	2.001	2.127
		0.85	1.503	1.235	1.396			1.259	1.004	1.212	1.981
		0.634	1.254	1.403	1.369			3.189	1.285	3.373	3.55
		1.096	1.221	1.591	1.071			2.258	1.192	2.092	1.821
		1.012	1.18	1.479	1.802			1.901	0.965	1.886	1.72
		0.712	0.86	1.299	2.479			1.728	1.42	1.222	2.295
		0.637	1.818	1.403	1.39			1.992	3.243	1.285	2.887
		1.231	1.32	1.007	2.037			1.874	1.204	1.698	0.661
		2.86	1.453	1.664	1.484			2.906	0.94	2.461	1.337
		1.314	1.738	0.96	1.341			2.43	1.096	1.209	1.154
		0.995	1.792	1.663	0.781			1.947	1.898	1.479	1.531
		1.101	1.453	0.749	2.779			2.245	1.133	1.233	1.784
		1.881	1.218	1.444	1.937			0.848	1.124	1.782	2.294
		1.698	1.039	0.978	1.344			1.646	0.972	0.562	2.69
		1.326	1.27	1.595	4.071			0.702	0.915	2.895	1.447
		1.719	1.632	1.06	2.103			1.532	1.845	2.331	1.664
		1.286	1.304	1.282	1.824			2.09	1.292	1.935	2.001
		1.368	1.116	0.851	2.623			2.255	0.66	1.194	3.038
		1.349	1.586	1.066	2.353			1.922	1.3	1.216	1.862
		1.709	1.243	1.536	2.387			1.878	1.336	1.572	2.881
		1.259	1.308	0.763	2.278			0.993	0.859	1.819	1.883
		1.73	0.715	1.018	2.631			0.782	0.934	3.452	1.617
		1.149	1.479	1.404	1.383			1.704	2.237	2.807	0.973
		1.057	1.013	0.835	2.733			1.311	2.817	3.264	2.015
		1.174	1.713	1.726	1.377			2.068	1.095	1.837	2.084
		1.365	1.277	0.798	1.635			0.966	0.908	2.73	0.796
		0.952	1.274	1.378	2.18			1.785	1.173	1.517	0.836
		1.138	0.923	1.312	2.746			1.771	1.22	1.54	0.576
		1.176	1.195	1.048	1.453			1.998	1.033	1.245	1.588
		1.308	2.182	1.085	2.16			2.328	1.122	3.091	0.987
		1.651	1.85	1	1.775			2.024	1.379	1.855	1.757
		2.17	1.53	1.155	0.938			1.971	1.245	2.37	1.997
		2.277	2.173	1.479	1.943			1.833	1.506	1.303	1.187
		3.57	0.851	1.068	2.301			2.373	1.164	1.939	2.823
		1.415	1.491	1.408	2.608			1.188	0.826	2.368	1.338
		1.261	1.202	0.949	2.247			0.843	0.677	1.906	1.378
		0.88	0.991	1.631	3.105			1.647	1.147	2.028	0.974
		1.571	1.005	0.803	2.487			1.892	0.616	1.801	0.978
		1.414	3.16	1.047	2.785			1.673	1.818	2.328	1.424
		1.115	1.359	1.658	2.839			2.325	0.932	1.852	2.907
		1.564	1.004	0.881	2.202			1.297	0.911	2.4	1.901
		1.591	1.534	1.18	2.072			1.543	0.918	1.327	1.568
		1.402	1.332	1.025	1.852			1.544	1.448	1.608	1.777
		1.502	0.836	1.326	1.269			1.198	1.331	1.801	1.024
		1.946	1.336	1.119	1.181			1.289	1.116	1.318	2.063
		1.827	1.195	1.433	2.158			2.791	1.041	0.884	0.734
		2.372	1.438	1.221	1.721			3.867	1.011	1.961	1.527
		2.105	1.815	1.323	1.689			2.147	1.369	3.073	1.092
		1.825	1.416	0.887	1.101			1.771	1.187	1.296	1.619
		1.467	1.391	1.266	1.053			1.513	1.337	2.27	1.199
		1.407	1.293	1.315	1.318			1.221	1.008	1.068	1.281
		0.705	0.844	1.53	1.866			1.867	1.26	0.875	0.788
		1.19	2.098	1.441	1.153			1.723	1.024	1.185	1.232
		1.317	1.393	1.004	1.625			1.397	1.433	1.411	0.742
		0.768	1.461	1.195	2.028			2.059	1.021	1.938	0.891
		1.331	1.115	1.128	2.233			1.347	1.013	1.209	1.204
		1.524	1.255	1.6	1.636			1.106	0.688	1.34	1.029
		1.25	1.154	1.223	2.208			1.976	0.934	2.791	1.262
		1.31	1.137	1.277	0.657			1.789	1.164	1.048	0.577
		1.227	1.103	1.64	3.488			1.901	1.019	2.018	0.645
		1.373	1.236	0.928	2.477			1.872	1.257	1.882	1.268
		1.096	1.4	1.242	2.488			2.77	1.254	2.519	0.645
		1.484	0.728	1.092	2.707			1.391	1.174	1.802	1.184
		1.548	1.22	1.407	1.825			1.515	0.735	1.323	1.567
		0.897	1.52	1.149	1.59			1.352	0.718	1.085	1.502
		1.262	1.298	0.729	3.496			1.227	0.711	0.86	2.897
		1.842	1.418	1.01	2.262			2.447	1.161	2.308	2.394
		2.044	0.769	0.932	0.958			2.07	0.945	2.014	2.942
		1.699	3.022	1.31	2.358			1.981	1.149	1.513	1.501
		1.129	1.612	1.261	2.609			2.46	1.607	1.668	1.567
		1.722	1.404	1.086	2.26			1.361	1.266	2.1	2.548
		1.463	1.407	1.008	2.287			1.819	1.045	0.881	0.719
		1.178	1.054	1.316	1.54			1.191	1.561	1.105	1.682
		1.061	0.844	1.722	2.225			2.019	1.195	0.806	1.927
		1.319	1.747	1.411	3.133			1.353	0.744	0.769	1.943
		0.872	1.31	1.46	2.781			2.123	0.903	1.31	1.361
		1.074	1.618	1.358	2.465			1.738	0.714	1.038	1.533
		2.04	1.35	1.441	0.839			2.981	0.68	1.495	1.866
		1.99	1.668	1.409	0.861			2.178	1.229	1.831	1.244
		1.416	1.597	0.953	1.955			1.464	1.444	2.386	1.152
		1.214	1.221	1.293	1.316			1.909	1.277	2.387	1.38
		1.256	1.083	1.192	1.519			1.408	1.17	1.524	2.066
		1.161	1.451	0.981	0.61			1.626	1.429	0.985	2.295
		1.115	1.546	1.283	1.659			0.689	1.839	0.575	1.326
		0.87	1.428	0.947	2.045			1.634	1.505	1.74	2.168
		1.389	1.546	0.87	2.452			1.722	0.99	1.866	1.565
		1.544	1.47	0.845	1.258			1.945	1.073	1.477	2.415
		1.592	1.653	1.11	4.157			1.979	1.075	1.998	2.064
		1.141	1.3	0.786	2.774			1.575	0.82	1.045	1.389
		1.274	1.618	1.164	3.075			1.936	1.185	1.508	1.529
		1.264	1.783	1	3.278			0.691	1.752	1.282	0.853
		0.934	0.833	1.55	3.204			2.969	0.747	1.038	2.332
		1.62	1.47	0.876	2.556			1.859	1.854	1.175	1.758
		3.015	1.282	1.028	2.218			2.009	1.812	1
		1.186	2.269	0.822	2.578			1.822	0.965	2.41
		1.073	0.752	1.427	2.499			0.575	0.627	1.163
		1.555	1.561	1.378	1.954			1.763	1.406	0.892
		1.149	1.774	1.46	1.292			1.726	1.227	0.757
		0.81	1.135	1.062	2.115			1.069	1.062	1.163
		0.846	1.397	1.993	2.269			2.773	1.639	0.944
		1.122	1.649	0.919	0.762			2.362	1.13	1.444
		1.448	1.279	1.328	2.855			1.568	1.541	2.063
		1.71	1.498	1.282	2.084			1.929	1.312	2.899
		0.603	1.554	1.484	3.091			2.122	3.206	1.643
		0.99	1.254	0.935	1.884			1.955	1.005	2.484
		0.96	1.955	1.18	1.845			2.446	1.518	0.902
		2.899	0.812	0.92	1.502			2.597	1.102	2.093
		1.806	1.21	2.757	1.924			2.18	1.011	1.522
		2.084	1.309	1.054	1.47			1.36	0.878	2.481
		1.142	1.506	0.64	2.096			2.107	1.359	1.002
		1.178	1.413	1.237	1.356			1.637	1.405	0.787
		0.611	1.148	0.918	2.675			1.261	1.304	2.446
		1.425	1.445	1.205	1.927			1.101	1.636	1.224
		1.176	0.783	1.915	1.15			2.516	1.108	1.709
		1.474	1.81	1.407	0.817			1.142	1.152	2.227
		1.295	2.659	1.385	2.107			1.385	1.264	2.593
		0.869	1.795	1.245	1.085			1.755	0.969	0.789
		1.361	1.531	1.338	1.422			1.371	1.054	1.114
		1.487	2.051	1.121	2.735			1.99	0.954	0.773
		1.022	0.734	1.703	0.928			2.41	1.3	0.836
		1.612	1.369	1.208	0.886			1.581	1.34	1.343
		1.41	0.923	1.46	1.698			1.178	1.101	1.522
		1.225	0.806	1.475	1.379			0.862	2.268	1.201
		1.737	1.172	1.204	1.649			1.996	1.061	1.698
		1.567	1.538	0.968	2.414			2.066	1.22	1.427
		2.54	1.194	1.127	1.374			1.984	1.455	1.568
		1.393	1.306	1.315	2.002			0.617	3.308	1.432
		1.266	1.448	1.378	1.179			2.186	1.013	1.639
		1.159	1.641	1.151	1.67			1.213	1.358	0.92
		1.023	1.305	1.267	1.452			2.543	2.711	0.922
		1.654	1.291	1.045	2.735			1.881	0.914	2.128
		1.126	1.626	1.344	0.999			1.151	1.379	0.86
		1.287	1.294	2.632	1.144			1.714	0.806	0.662
		1.19	1.473	1.337	1.278			1.953	1.262	1.816
		1.427	0.957	1.179	2.057			2.094	1.282	1.336
		1.205	1.75	1.268	1.754			1.174	0.855	1.139
		1.106	1.574	1.513	2.015			2.647	1.047	2.046
		1.137	1.724	1.647	3.148			0.528	1.171	2.276
		1.321	1.514	1.142	2.169			0.888	0.807	2.201
		1.124	1.333	1.317	1.554			1.535	1.125	2.204
		2.07	0.733	1.202	0.961			1.855	1.053	1.197
		1.771	1.425	1.596	0.825			1.433	0.697	0.941
		1.047	1.109	0.986	1.202			1.274	1.498	1.387
		1.019	1.537	1.542	1.423			1.636	1.434	1.915
		1.376	1.161	1.674	3.828			1.401	1.361	1.942
		1.08	1.436	1.195	2.076			1.785	1.174	2.102
		1.458	1.095	1.519	2.29			1.348	1.079	1.747
		1.628	1.502	1.156	2.291			2.46	0.866	0.747
		1.271	0.906	1.315	1.362			1.727	0.918	1.415
		1.092	1.307	1.496	1.121			2.201	1.318	1.491
		1.377	0.977	1.969	1.785			1.555	0.995	1.704
		1.495	1.582	1.692	1.715			1.682	1.757	0.725
		1.003	0.879	1.148	1.401			1.362	0.955	0.893
		0.975	1.424	1.219	1.34			1.163	1.034	2.11
		1.126	0.902	1.428	1.129			0.946	1.119	1.801
		1.162	1.242	1.311	1.086			1.805	1.132	0.632
		1.952	1.092	1.361	2.763			2.06	1.182	2.97
		0.829	0.618	1.468	1.614			2.044	1.46	2.738
		0.888	1.516	1.074	3.245			1.458	1.354	0.641
		1.076	1.858	1.542	1.579			1.906	1.397	2.277
		0.976	1.398	1.456	1.775			1.578	1.435	2.158
		1.405	1.4	1.65	3.404			2.248	1.272	2.791
		1.157	2.268	1.231	1.163			0.628	1.376	2.162
		1.078	1.522	1.502	0.978			1.181	1.346	1.777
		1.292	1.283	1.235	1.042			1.15	1.214	3.058
		1.204	0.71	1.217	0.65			1.982	1.279
		1.061	0.908	1.25	1.047			1.256	0.996
		3.025	1.104	1.209	2.656			0.531	1.373
		1.691	1.079	0.926	1.666			0.752	1.018
		1.298	0.918	1.278	3.159			1.832	1.101
		1.056	1.271	1.62	1.124			2.162	1.309
		0.794	1.48	1.63	1.638			1.806	1.441
		1.045	0.713	1.473	1.748			1.746	1.372
		1.262	1.07	2.444	2.628			1.935	1.17
		1.34	1.29	1.449	2.164			1.543	0.901
		0.888	1.435	1.257	2.459			2.061	0.975
		1.042	0.945	1.212	2.345			1.083	1.724
		1.317	1.041	1.081	2.346			0.799	1.44
		1.003	2.165	1.423	2.003			2.021	0.804
		1.296	1.443	1.455	2.526			1.166	0.919
		1.408	1.211	1.502	2.173			1.741	0.764
		1.303	1.429	1.334	1.683			1.651	1.98
		1.66	1.033	1.645	2.154			1.773	1.034
		1.345	1.782	0.95	1.578			0.952	2.912
		2.238	0.945	1.194	1.464			1.201	2.374
		1.097	1.418	1.663	1.96			1.214	1.647
		1.525	0.884	1.174	2.372			2.504	1.325
		1.257	1.249	1.573	1.667			3.128	1.963
		1.248	1.833	1.167	2.238			1.513	1.242
		1.287	1.686	1.417	2.568			1.304	1.663
		1.543	1.798	1.087	2.585			1.51	1.409
		1.591	1.508	1.014	1.993			1.373	1.316
		0.903	1.303	0.976	1.548			1.44	1.406
		1.362	0.801	1.524	1.402			1.624	1.399
		2.338	1.474	1.219	2.502			1.129	1.263
		1.705	1.304	1.629	1.756			2.061	1.077
		1.041	0.924	1.159	2.262			1.471	1.044
		1.441	1.436	2.817	1.127			1.223	1.287
		1.34	0.879	1.346	1.808			2.439	1.084
		1.266	1.322	0.785	2.808			1.373	1.306
		1.339	1.799	1.231	1.03			1.732	1.533
		1.877	1.251	0.859	2.734			1.145	1.035
		1.054	1.635	1.09	1.746			1.976	1.201
		0.963	1.161	3.208	1.266			1.777	0.962
		1.477	0.862	1.08	2.185			1.713	0.761
		1.062	3.348	0.795	1.846			1.573	1.03
		1.774	1.327	1.22	0.609			2.126	1.215
		1.75	1.77	1.265	2.216			1.815	1.125
		1.195	1.39	1.65	1.718			1.639	2.575
		1.474	1.246	1.705	1.743			1.891	0.871
		1.515	1.296	1.957	0.998			1.745	1.3
		2.224	1.168	0.936	1.398			1.454	1.207
		1.269	1.441	1.212	2.352			2.109	1.491
		0.829	1.083	0.888	0.991			2.407	0.763
		1.078	1.572	0.781	1.675			1.166	1.182
		1.348	1.194	1.618	2.003			1.752	0.74
		1.435	1.384	1.023	1.683			0.998	0.964
		0.727	0.694	1.116	2.528			2.422	2.534
		0.973	1.373	1.172	1.155			1.502	0.947
		0.881	1.128	1.345	1.929			1.749	1.026
		0.927	1.54	1.256	2.612			1.666	1.313
		1.219	1.185	1.142	1.411			1.474	1.358
		1.3	1.268	1.304	1.321			1.12	0.936
		1.452	1.353	1.473	0.99			2.642	2.535
		1.888	1.069	0.945	1.524			1.579	1.563
		1.281	1.335	1.352	2.485			2.091	1.141
		1.805	1.047	1.378	1.263			1.19	0.821
		2.349	0.79	0.941	3.136			1.504	1.434
		0.944	1.597	1.127	2.816			1.508	2.069
		0.83	1.395	1.01	2.914			1.565	2.635
		1.236	1.348	1.057	2.062			1.433	1.09
		1.174	1.266	1.39	3.388			2.42	1.766
		0.967	1.46	1.639	2.807			0.916	1.49
		1.492	1.164	0.991	1.452			2.555	1.205
		1.834	3.062	1.142	2.507			2.845	1.792
		2.184	1.495	1.359	1.087			1.458	1.689
		1.069	1.182	1.152	3.41			3.743	1.84
		0.667	3.743	1.568	3.539			2.123	1.341
		1.201	1.197	1.145	2.045			0.854	0.989
		1.631	1.288	1.559	2.238			1.652	3.106
		1.512	1.06	0.667	2.765			1.755	1.163
		0.878	1.2	1.123	1.922			1.714	1.162
		1.638	1.193	1.521	2.288			1.84	0.786
		2.128	1.339	1.345	1.772			1.353	1.4
		3.177	1.416	0.978	2.054			1.267	1.859
		1.924	1.417	0.956	2.684			3.26	3.218
		1.047	1.307	1.488	1.772			2.423	1.397
		1.279	1.187	1.7	1.214			1.941	1.104
		1.118	1.115	1.286	2.264			2.126	0.986
		1.323	1.524	0.97	2.942			1.845	2.792
		1.681	1.413	1.477	3.369			2.271	0.774
		1.685	1.123	1.528	2.133			1.354	1.16
		1.841	0.994	1.485	4.147			1.797	0.73
		1.269	1.243	1.186	2.185			2.446	2.756
		1.367	1.379	1.255	2.273			1.609	2.424
		1.158	1.405	1.203	1.593			1.175	1.176
		1.738	1.16	1.322	1.676			2.283	0.759
		0.763	1.051	0.825	0.799			1.599	0.704
		1.142	1.891	1.218	2.436			2.725	3.091
		0.605	1.589	1.466	2.857			3.348	0.967
		1.107	1.106	1.603	2.543			2.308	0.973
		1.214	1.174	1.093	1.164			1.783	1.174
		1.127	1.415	0.943	2.73			2.388	1.251
		1.467	1.303	1.636	3.133			1.499	1.674
		0.918	1.027	1.306	2.905			1.809	1.398
		1.537	1.303	1.315	1.977			1.797	1.443
		1.254	1.317	1.269	1.038			1.403	1.48
		1.454	1.811	1.524	2.117			1.758	2.066
		1.011	2.241	1.077	1.785			2.042	1.152
		0.878	1.634	1.047	2.328			1.499	1.329
		1.379	2.863	1.248	1.604			1.259	1.077
		1.581	1.351	1.09	2.743			2.019	1.234
		0.985	1.275	1.24	1.831			0.996	1.978
		1.079	1.217	1.428	3.09			1.194	0.778
		1.387	1.49	1.843	1.68			1.131	1.199
		1.447	1.21	2.068	1.487			1.128	0.826
		1.449	1.104	1.295	1.911			2.94	1.977
		1.482	1.199	1.17	2.078			1.567	1.712
		2.048	0.815	1.213	1.966			2.267	1.047
		1.285	1.032	1.089	2.535			1.806	1.072
		0.952	1.072	1.424	2.266			2.314	1.516
		1.392	1.269	1.226	1.381			1.182	1.521
		0.898	1.408	1.323	2.883			2.031	2.558
		1.517	1.499	1.274	1.875			1.647	1.694
		1.402	1.276	1.28	0.96			1.926	1.48
		1.427	1.025	1.402	3.165			1.87	0.996
		1.131	1.311	1.387	1.982			2.599	1.034
		1.724	1.391	1.019	2.203			1.145	1.107
		1.196	1.892	1.528	2.41			3.053	1.56
		1.219	1.477	1.264	2.98			1.749	1.108
		0.789	1.264	1.288	1.953			1.891	3.013
		1.293	1.852	1.053	2.144			1.279	1.189
		1.76	0.949	1.119	3.235			2.235	1.42
		1.113	1.469	1.578	2.094			1.688	1.088
		1.385	1.429	0.839	1.476			1.385	1.309
		1.302	1.098	1.354	1.271			1.73	1.103
		1.167	0.937	1.289	1.444			2.3	1.104
		1.036	0.819	1.461	1.285			1.08	0.915
		1.533	1.223	1.162	2.539			1.571	1.202
		1.35	1.302	1.36	1.726			1.345	1.197
		1.376	0.937	1.364	1.038			2.447	0.899
		1.372	1.025	0.924	1.73			2.639	1.602
		1.541	3.175	1.095	1.399			1.33	0.716
		1.236	1.412	1.313	2.05			2.361	2.171
		1.34	2.28	0.997	3.4			0.957	1.223
		0.942	1.034	1.703	3.823			1.002	1.165
		1.375	1.573	1.313	1.266			1.816	1.491
		1.49	1.514	1.45	2.088			0.769	1.615
		1.547	1.273	1.063	1.203			2.379	2.232
		1.398	1.334	1.265	1.054			1.988	1.408
		1.057	1.123	1.223	1.049			1.052	0.678
		1.08	0.839	1.206	1.926			1.911	1.195
		1.049	1.276	1.117	2.381			2.152	1.055
		1.173	1.407	1.443	1.77			2.13	1.275
		1.449	1.471	1.976	2.095			2.449	1.035
		0.891	1.451	1.021	2.445			1.177	1.369
		1.119	1.598	1.355	2.645			1.128	1.315
		1.2	1.409	1.201	2.062			2.239	1.115
		1.413	1.065	0.802	1.407			1.152	2.692
		0.75	0.894	0.938	2.631			2.588	0.768
		1.128	0.692	1.265	0.864			1.244	1.114
		1.041	1.258	1.43	3.451			1.274	1.474
		0.835	1.63	0.784	1.677			2.354	1.566
		1.019	1.137	1.337	2.174			1.333	2.603
		1.152	1.227	0.876	1.055			2.337	1.579
		1.182	1.263	1.023	0.727			2.016	1.36
		2.339	2.201	0.957	2.32			1.189	1.442
		1.238	1.147	1.355	2.064			1.696	1.081
		1.239	1.306	0.885	2.352			1.53	1.501
		1.072	1.848	0.872	1.71			1.259	1.327
		1.23	1.282	1.452	1.807			1.399	1.146
		1.886	0.943	1.383	1.808			1.758	1.38
		2.326	1.074	0.752	1.826			1.247	1.025
		1.378	1.237	1.155	1.376			1.9	1.47
		1.056	1.116	1.018	1.991			1.907	2.289
		1.263	1.156	0.826	1.566			2.29	1.361
		1.158	1.396	1.23	1.675			1.792	1.716
		2.047	1.144	0.882	2.045			1.62	3.584
		2.056	1.307	1.422	0.662			1.956	3.186
		2.125	1.303	1.573	1.517			2.173	1.48
		1.295	1.306	0.897	0.872			1.833	1.46
		1.727	1.394	2.289	1.724			1.155	1.574
		1.056	1.45	1.492	1.841			2.904	1.139
		1.515	1.769	1.576	3.52			1.641	1.116
		1.194	1.556	1.953	2.036			1.458	1.022
		1.411	1	1.113	1.832			2.05	1.304
		1.067	1.117	1.242	1.96			2.077	1.575
		1.008	0.907	1.287	1.732			1.574	1.282
		1.118	1.236	1.206	2.146			1.87	1.284
		0.935	1.035	1.664	1.942			1.248	1.134
		1.147	1.223	1.417	1.763			2.57	1.523
		1.148	1.004	1.005	1.863			1.56	1.616
		1.388	1.379	1.451	2.633			1.854	0.958
		1.77	3.332	1.239	2.462			2.413	1.393
		0.951	3.393	0.834	2.009			2.137	1.006
		1.637	1.54	1.212	1.407			2.565	2.373
		1.791	1.181	1.092	1.708			2.352	1.183
		1.294	1.53	0.798	2.2			1.072	1.42
		0.939	1.347	0.915	1.732			2.847	1.234
		1.359	2.794	1.435	2.446			2.12	1.33
		0.758	0.979	1.286	2.847			1.926	0.792
		1.016	1.521	0.705	2.371			1.355	1.072
		1.176	1.374	1.093	2.737			1.598	1.027
		0.92	1.043	0.873	2.201			1.642	1.36
		1.469	1.855	1.135	2.239			1.82	1.281
		0.996	0.989	0.991	2.269			1.277	1.817
		1.772	0.787	1.375	1.154			2.88	1.466
		1.455	0.915	1.125	2.076			1.79	1.153
		1.329	1.468	0.986	1.216			2.263	1.577
		1.363	1.325	2.607	2.039			1.789	1.172
		0.972	1.275	1.291	2.385			2.069	1.316
		1.045	1.102	1.601	2.937			2.179	1.321
		1.274	1.511	0.86	2.003			1.098	1.298
		2.5	1.086	0.975	2.063			1.738	0.937
		1.435	1.514	0.932	1.888			0.902	2.655
		1.069	1.206	1.344	0.956			2.018	1.546
		1.215	1.206	1.528	2.259			2.273	0.95
		1.359	1.533	0.645	3.214			1.658	1.68
		0.983	1.204	1.124	2.031			1.16	2.404
		0.803	1.567	1.708	1.391			1.136	0.878
		1.221	1.14	1.062	1.121			1.31	0.75
		0.925	1.041	0.72	1.323			1.483	1.161
		1.048	1.097	0.761	1.932			2.598	1.355
		0.851	1.164	1.341	1.651			1.527	1.592
		1.476	1.186	1.259	1.879			1.112	0.898
		2.495	0.661	2.941	1.236			1.671	0.863
		2.184	1.424	1.101	1.133			2.187	1.337
		1.83	1.025	0.798	1.967			2.204	2.045
		1.3	1.025	1.17	2.994			1.004	1.163
		1.26	0.703	0.977	2.613			1.229	1.796
		1.24	1.234	1.647	1.565			1.697	1.032
		0.745	1.461	1.275	1.385			2.001	0.992
		1.712	1.316	1.632	1.779			0.765	1.445
		1.46	1.191	1.357	2.505			0.916	1.173
		1.247	1.265	0.83	2.389			1.83	1.376
		1.248	1.659	1.324	3.49			2.035	1.307
		2.072	1.342	1.118	2.159			1.429	1.027
		1.536	1.379	1.02	2.423			1.359	1.096
		1.46	1.479	1.08	1.886			2.014	0.756
		1.186	1.64	1.039	2.772			1.227	2.747
		1.363	1.173	1.177	2.559			1.328	0.461
		1.483	0.762	1.288	1.796			1.955	1.034
		0.932	2.015	1.054	1.045			2.425	1.415
		1.598	1.411	1.253	2.441			1.236	1.031
		1.591	1.039	1.315	1.662			1.293	0.92
		1.53	1.033	1.045	1.347			1.27	1.015
		1.097	1.188	0.774	1.644			1.444	1.222
		1.523	1.127	1.158	2.042			2.518	1.172
		1.155	0.957	1.264	2.085			1.121	1.407
		2.072	1.41	1.677	1.153			1.616	0.667
		1.126	1.455	0.927	1.934			0.989	1.173
		1.436	0.842	1.904	1.94			1.53	0.899
		1.168	1.063	0.827	1.994			0.909	2.47
		1.058	1.176	0.788	2.518			1.136	0.863
		1.359	1.018	0.842	1.748			1.253	1.182
		1.346	1.356	1.174	1.549			1.352	0.989
		0.803	1.218	1.569	1.63			1.642	1.251
		0.909	2.098	1.133	1.282			1.265	1.015
		1.18	1.605	1.065	1.693			1.242	1.064
		0.798	3.918	0.891	3.001			2.404	1.061
		1.551	1.135	1.232	1.706			1.55	1.189
		1.304	1.219	1.227	1.814			2.169	1.21
		1.739	0.786	1.142	2.574			1.207	1.253
		0.857	1.371	0.803	1.7			1.204	1.946
		1.233	1.122	1.347	3.535			2.067	1.302
		1.21	1.503	1.109	2.576			1.25	0.786
		1.407	1.129	1.095	1.711			0.98	1.427
		1.484	1.185	1.002	2.698			1.691	0.933
		0.979	1.208	2.022	2.369			1.134	0.834
		1.257	1.188	1.036	2.464			1.2	2.637
		1.245	1.082	1.319	2.255			1.683	1.328
		0.808	1.44	3.067	1.062			0.957	0.812
		0.952	1.397	3.147	1.904			1.017	1.357
		1.514	1.215	3.233	2.217			2.06	0.932
		1.048	1.531	0.973	2.526			1.942	1.697
		1.367	1.114	1.629	2.388			2.215	0.921
		1.459	1.717	1.268	1.608			1.611	1.078
		1.364	1.487	1.574	2.701			1.422	1.129
		1.233	1.661	1.372	0.983			1.888	0.788
		3.001	1.234	0.697	0.9			1.076	1.014
		3.024	0.923	1.638	1.363			1.757	0.803
		1.355	1.528	1.344	2.657			2.136	1.117
		1.176	1.486	1.601	1.375			1.096	1.481
		0.726	1.31	1.008	1.526			2.228	0.994
		1.663	1.278	2.665	2.178			1.461	1.493
		1.42	1.363	1.095	1.877			2.084	0.872
		2.155	1.167	1.139	1.689			1.005	1.017
		1.17	1.285	1.125	2.437			1.981	1.767
		2.192	0.93	1.052	2.285			1.522	2.913
		1.689	0.875	1.438	2.218			1.466	1.223
		1.689	1.224	0.822	1.844			0.788	1.672
		1.441	1.004	0.981	1.626			1.577	3.308
		1.075	1.589	1.388	0.733			2.089	1.416
		1.312	1.515	1.041	1.404			2.649	1.038
		0.913	1.249	1.218	1.131			2.15	2.034
		1.278	0.912	1.123	2.673			1.652	1.467
		1.522	1.265	1.175	1.314			1.669	1.026
		1.326	1.454	0.934	0.973			1.614	0.756
		0.799	1.226	1.416	3.059			2.503	1.12
		1.653	1.428	0.826	2.762			0.841	0.863
		1.415	1.357	1.324	2.622			1.604	0.788
		2.179	1.621	1.378	2.259			1.247	1.045
		1.297	3.69	1.293	1.857			2.158	1.087
		1.1	1.84	1.403	0.984			1.404	1.45
		1.012	1.183	1.25	1.967			0.565	0.888
		1.758	1.213	1.43	1.436			1.323	0.91
		3.462	1.383	1.213	0.844			1.399	0.945
		1.786	1.184	1.341	1.891			1.404	1.07
		1.678	1.347	1.258	1.133			2.129	2.419
		1.417	1.248	0.823	2.286			1.872	2.781
		1.131	1.17	1.167	1.339			1.793	0.756
		1.311	1.411	0.998	1.848			1.654	0.742
		1.37	1.361	1.455	2.098			1.022	1.208
		1.497	1.226	1.203	1.34			2.205	0.68
		1.228	1.05	1.177	2.348			0.959	1.005
		2.163	0.921	1.598	2.314			1.492	1.419
		2.411	1.361	0.923	1.585			1.531	0.964
		1.322	1.351	1.453	2.591			1.678	1.106
		1.194	2.132	1.651	2.048			1.216	1.109
		1.94	1.02	1.111	2.144			1.678	1.14
		0.965	3.219	1.167	1.633			2.232	0.772
		1.492	1.465	0.977	1.781			1.709	1.394
		1.89	1.35	1.261	1.764			1.37	3.586
		1.531	1.208	1.259	2.511			1.589	0.761
		1.776	1.159	0.96	3.388			1.956	0.806
		1.577	1.124	0.693	2.181			2.298	1.334
		0.973	1.161	1.286	2.103			1.941	0.848
		0.959	1.536	1.399	1.709			1.763	1.228
		1.183	1.36	0.844	0.94			2.015	1.022
		1.976	1.352	1.131	2.04			1.487	1.301
		1.296	1.11	1.272	1.652			2.739	1.256
		1.08	1.075	1.253	0.649			0.986	1.66
		0.846	1.044	1.044	1.519			2.135	0.994
		1.208	1.002	1.779	0.745			1.595	1.236
		0.678	1.781	1.714	1.381			1.076	1.763
		0.972	1.315	1.237	1.343			0.906	1.084
		1.246	2.005	1.19	3.167			1.46	0.765
		0.93	1.282	1.165	1.383			1.898	0.724
		1.856	1.351	1.029	1.709			1.577	1.517
		1.393	1.233	1.493	2.166			1.684	1.692
		1.045	1.312	1.084	2.403			1.782	1.329
		1.232	1.106	1.492	0.953			1.539	0.687
		0.844	1.299	1.19	4.043			1.581	1.203
		1.296	2.261	1.065	2.422			1.138	1.151
		1.504	1.7	1.115	1.703			0.879	0.981
		2.238	1.666	0.819	1.899			1.72	0.778
		1.861	1.23	1.332	1.838			1.387	1.46
		2.058	1.611	0.801	1.362			1.453	1.124
		0.977	1.585	1.424	0.833			1.615	0.992
		0.802	0.996	1.004	1.389			2.302	1.045
		0.614	1.413	1.617	1.96			1.637	1.097
		0.987	1.278	0.87	3.01			1.333	1.079
		1.237	2.019	1.143	2.781			1.435	1.243
		0.995	1.251	1.914	2.187			1.325	1.103
		1.564	1.359	1.244	1.576			1.209	1.401
		1.063	1.172	0.599	1.375			1.545	1.317
		0.806	2.574	1.092	1.807			1.064	2.722
		1.022	0.83	1.214	1.427			1.811	1.425
		1.187	1.116	1.331	2.5			1.803	1.272
		1.147	1.086	1.134	3.346			1.401	1.23
		1.038	1.186	1.182	2.721			1.856	1.217
		1.047	1.344	1.679	1.691			2.425	1.291
		1.712	1.004	0.815	1.222			2.114	0.842
		0.832	1.302	1.501	3.607			2.149	0.974
		1.046	0.672	1.027	1.54			1.759	1.32
		2.038	0.967	1.268	2.682			1.792	1.082
		0.863	1.295	1.68	4.223			1.075	1.335
		1.178	1.254	1.742	3.202			1.579	1.01
		1.203	1.448	1.906	1.897			2.745	0.878
		1.187	1.273	1.063	2.306			1.022	0.884
		1.197	1.368	0.894	1.558			1.023	1.071
		1.285	1.465	0.974	1.578			2.557	1.771
		1.427	1.651	1.242	1.339			1.309	1.021
		1.276	1.501	1.07	1.241			2.422	1.121
		1.182	1.153	1.485	0.897			1.152	1.279
		1.718	1.401	0.656	1.224			1.287	1.207
		1.781	1.255	1.08	1.018			2.832	1.193
		0.963	1.734	1.446	1.511			1.421	1.004
		2.037	1.576	1.351	0.899			0.979	2.112
		0.98	0.848	1.23	1.265			0.889	1.512
		2.233	0.669	1.195	1.756			3.091	1.151
		1.909	1.444	0.995	2.097			0.976	1.22
		0.623	1.083	0.753	2.529			1.824	1.062
		1.27	1.13	1.261	1.845			2.011	1.253
		1.124	1.199	1.209	1.793			1.268	2.505
		1.612	1.164	1.297	2.56			2.075	1.597
		0.901	1.15	1.288	3.185			1.779	1.024
		1.27	1.237	1.494	2.433			1.65	1.566
		1.655	0.976	1.184	2.589			1.265	1.254
		1.27	1.349	1.278	2.016			1.989	0.943
		0.626	1.664	0.959	1.797			0.973	0.851
		1.2	1.05	1.154	2.179			1.513	1.001
		0.686	1.637	0.988	1.334			1.851	1.231
		0.739	1.3	0.815	1.865			1.535	1.018
		1.783	1.198	1.07	2.154			1.211	0.805
		0.859	1.709	1.485	1.575			1.896	1.462
		0.999	1.322	1.05	1.567			2.399	1.321
		0.639	1.205	1.173	1.653			1.951	1.325
		0.818	0.749	1.062	0.731			2.904	0.902
		1.237	1.57	2.013	1.505			2.482	0.914
		1.211	1.311	1.217	1.996			2.062	0.925
		1.326	2.439	1.01	1.355			1.897	0.674
		1.048	1.884	1.691	2.637			1.71	1.286
		0.927	1.189	0.918	0.958			0.874	0.741
		0.904	1.083	0.959	1.87			1.786	1.269
		1.013	1.144	0.798	3.056			2.671	0.887
		1.852	1.243	1.357	1.646			0.971	1.3
		1.869	1.27	0.995	2.172			1.476	0.934
		1.599	3.168	1.026	3.097			1.261	0.676
		1.368	2.924	0.692	2.836			1.775	1.087
		1.156	1.048	1.394	2.519			1.254	1.052
		0.872	1.023	0.928	0.948			1.984	1.219
		1.453	1.174	0.856	0.689			1.34	1.073
		0.767	1.034	1.115	3.049			2.05	0.946
		1.335	0.995	1.124	1.734			1.974	1.103
		1.19	1.307	1.103	1.214			1.717	0.704
		1.36	1.567	1.44	1.402			1.11	1.223
		1.712	1.146	1.033	1.287			2.007	0.974
		1.607	1.329	0.944	1.468			1.221	1.062
		0.769	1.269	1.454	2.197			2.109	1.08
		2.128	0.967	0.877	1.446			1.797	1.134
		1.368	1.507	1.391	1.795			0.79	1.707
		1.132	1.288	0.707	1.828			1.823	2.472
		1.286	1.228	1.898	0.799			1.376	0.754
		1.294	1.403	1.463	2.356			0.841	1.402
		1.066	1.314	0.777	2.236			0.805	1.511
		1.786	1.563	1.248	1.248			1.189	0.793
		1.464	1.297	1.308	2.158			1.331	1.066
		1.496	1.42	0.857	2.082			1.91	0.952
		0.839	1.708	1.236	1.587			1.686	0.935
		2.873	1.131	1.412	0.743			1.754	1.463
		1.281	1.374	1.087	1.832			2.15	1.303
		1.625	1.025	1.475	1.619			1.609	1.078
		1.363	1.583	1.289	1.661			1.045	1.025
		1.431	1.222	1.199	1.235			1.269	0.716
		1.831	1.896	0.994	1.737			1.472	1.258
		1.368	1.063	1.371	0.77			1.564	2.254
		0.963	1.284	1.015	2.525			1.566	1.751
		2.376	1.376	2.059	0.851			1.328	1.415
		1.175	2.385	1.257	2.133			2.023	2.947
		1.208	1.799	0.49	2.648			1.889	1.795
		1.089	2.109	1.367	1.658			1.152	1.099
		1.877	1.697	0.753	2.38			1.478	0.768
		1.516	1.332	1.485	2.05			2.073	1.187
		2.128	1.04	0.91	2.168			1.531	0.987
		0.931	1.199	1.295	1.63			1.262	1.17
		3.138	1.061	1.349	1.113			0.848	1.222
		1.142	0.892	1.474	1.347			1.556	1.325
		1.019	1.476	0.686	2.418			2.244	0.908
		1.275	1.299	1.098	1.91			1.733	0.542
		1.949	1.356	0.876	2.687			1.19	1.128
		1.174	1.548	1.017	0.927			1.338	0.893
		1.134	1.441	0.985	1.078			1.21	0.837
		0.873	1.376	1.278	2.285			2.639	0.759
		0.761	0.928	0.826	1.42			1.908	0.76
		1.188	1.607	0.716	1.615			1.8	0.629
		0.998	1.194	1.628	1.853			2.081	2.028
		1.38	1.837	1.656	1.258			1.091	0.965
		1.005	1.576	1.74	1.496			1.843	3.303
		0.951	1.563	1.484	0.856			1.83	1.594
		1.229	1.334	1.082	1.82			1.687	1.608
		0.98	1.523	1.229	1.954			1.946	1.191
		1.418	1.69	0.846	1.679			2.048	1.294
		1.72	0.973	1.297	1.111			2.01	0.835
		1.427	1.115	1.662	1.611			1.651	1.059
		0.912	0.99	1.165	1.324			2.152	0.644
		1.548	1.024	0.957	2.279			1.746	1.04
		1.145	1.315	2.808	0.856			1.391	3.228
		1.36	1.212	1.134	1.681			1.394	1.022
		1.27	1.03	1.125	0.792			1.224	4.496
		2.017	1.139	1.236	2.55			1.435	0.81
		1.394	1.354	1.733	2.084			1.646	0.934
		1.042	1.492	0.85	2.375			2.229	1.072
		0.971	1.038	2.854	2.937			1.276	0.89
		0.534	1.872	2.8	1.766			1.797	1.161
		1.151	1.679	1.868	2.734			1.073	0.862
		1.143	1.258	1.263	1.264			1.899	1.093
		1.038	1.471	1.526	1.843			1.8	2.918
		1.493	1.166	1.104	2.265			1.754	1.185
		0.725	3.785	1.305	2.692			1.913	1.255
		1.373	1.42	1.429	2.825			1.186	2.954
		1.44	1.352	1.38	3.599			1.891	2.308
		0.941	1.19	1.23	1.744			0.763	1.389
		0.983	1.47	1.208	1.074			1.081	1.156
		1.142	2.592	0.843	1.386			1.705	2.634
		1.309	1.548	0.737	1.562			0.736	3.916
		1.806	1.471	1.25	1.062			1.998	0.729
		0.895	1.212	1.325	1.249			1.433	1.064
		1.149	0.821	0.943	0.924			1.214	1.293
		0.935	1.21	1.613	1.173			1.981	3.729
		0.885	1.633	0.516	1.219			2.005	1.236
		1.321	1.728	1.567	1.053			1.755	3.684
		1.07	0.725	1.326	2.221			1.894	3.167
		0.789	2.806	1.17	1.088			1.319	1.12
		1.177	2.933	1.377	1.979			1.404	3.199
		1.369	2.19	1.075	1.421			2.604	1.181
		1.012	1.544	1.239	2.542			1.963	1.195
		0.897	1.244	1.184	1.946			2.052	1.34
		1.085	1.108	0.691	2.244			1.386	2.477
		1.005	1.053	0.843	1.481			1.867	2.601
		1.329	1.041	0.487	1.45			2.254	1.556
		0.548	1.538	1.379	1.815			1.176	0.806
		0.879	1.529	1.659	1.112			1.737	0.738
		1.499	1.674	1.528	1.598			1.36	0.757
		1.224	1.068	1.441	1.335			1.361	0.908
		1.083	0.712	0.988	1.667			1.622	0.94
		1.167	1.442	1.329	0.764			1.955	1.303
		1.147	1.485	1.244	1.515			1.757	1.244
		0.765	1.664	1.021	1.563			0.948	0.968
		1.072	0.969	1.463	1.972			1.057	1.235
		0.996	1.271	1.058	1.15			1.744	1.151
		1.364	1.426	1.017	0.791			0.948	1.584
		1.371	1.376	1.392	1.71			0.7	1.017
		2.35	1.561	1.547	2.549			1.626	1.27
		1.102	1.906	1.236	1.411			1.276	1.172
		1.258	1.479	1.572	1.353			1.384	1.749
		0.998	1.406	1.277	1.678			1.213	1.649
		0.965	2.648	0.978	2.873			1.615	1.719
		1.517	1.864	1.196	2.378			1.839	0.632
		2.207	0.857	1.364	1.276			3.434	0.857
		2.555	1.168	1.573	1.727			1.38	1.003
		0.735	1.093	1.196	2.208			1.936	1.051
		1.354	1.49	1.404	2.144			1.266	0.867
		1.609	0.67	0.637	1.375			1.215	1.434
		1.561	1.455	1.185	1.135			1.603	2.118
		1.244	1.208	1.016	1.072			1.153	0.865
		1.535	1.248	1.213	2.307			1.965	1.031
		0.983	1.042	1.165	0.959			2.234	1.308
		1.306	1.637	1.444	1.202			2.309	0.888
		1.18	1.359	1.071	1.639			1.938	0.981
		1.249	2.426	1.112	2.586			2.192	0.852
		1.18	1.093	1.146	1.851			1.515	2.047
		0.929	1.454	1.101	2.207			1.246	1.031
		1.07	1.246	1.476	2.274			1.994	0.872
		1.481	0.877	0.934	2.496			2.111	1.197
		1.526	0.906	1.266	0.956			1.372	0.875
		1.587	2.031	0.916	2.371			1.813	1.079
		1.351	1.47	0.675	2.055			1.423	1.32
		0.852	1.464	1.125	2.513			1.283	0.903
		1.77	0.996	0.836	1.444			0.873	1.008
		1.258	1.524	0.952	1.389			1.648	0.968
		0.984	1.249	1.544	1.794			0.952	0.821
		0.768	0.984	0.888	1.263			1.555	2.181
		1.436	1.496	1.283	2.089			1.657	1.066
		1.462	0.795	1.049	1.179			1.878	1.161
		1.48	1.532	1.049	1.314			2.057	1.156
		1.245	1.481	1.235	1.367			1.939	0.6
		1.503	1.558	0.886	3.598			1.24	0.79
		1.318	1.402	1.875	2.552			1.722	1.064
		1.497	1.165	1.074	1.773			0.739	1.17
		1.782	1.534	1.233	1.345			1.413	1.459
		1.397	1.348	0.829	2.322			1.08	0.807
		1.984	1.165	0.692	1.92			2.054	1.333
		1.646	1.324	1.262	2.584			1.593	1.035
		1.217	0.996	1.048	2.221			1.232	1.748
		1.789	1.594	1.371	0.882			1.287	1.287
		1.837	1.574	1.547	1.908			1.73	0.768
		0.911	2.16	0.752	2.393			2.105	1.25
		1.129	1.375	1.705	2.083			1.007	0.835
		1.088	0.926	2.036	2.014			2.239	1.436
		1.281	1.473	1.049	1.193			1.198	1.07
		0.995	0.996	1.461	1.659			2.016	0.888
		1.749	0.726	1.25	2.754			2.007	1.347
		1.016	1.352	0.901	1.412			1.789	0.857
		1.583	1.795	0.953	2.129			1.738	1.167
		1.63	1.146	1.042	1.605			1.884	0.941
		1.494	1.245	0.917	1.319			0.928	0.787
		1.234	1.804	1.211	1.93			1.374	0.883
		1.311	1.926	1.137	1.836			1.88	1.185
		1.674	1.377	1.549	2.527			1.853	0.715
		1.784	1.459	1.022	1.144			1.923	1.161
		1.15	1.15	1.13	1.848			3.042	1.58
		2.093	1.104	0.908	2.927			2.147	1.212
		1.294	1.283	1.198	3.144			1.404	1.232
		1.22	1.341	1.576	2.265			1.879	0.907
		1.585	1.416	1.222	1.539			2.648	1.234
		1.355	1.274	1.674	0.985			1.974	1.796
		1.022	1.422	1.414	1.582			1.433	0.931
		0.952	1.476	1.325	2.245			2.357	0.822
		0.888	1.101	1.008	1.815			1.183	1.189
		1.6	0.994	0.801	1.147			1.555	1.185
		1.431	1.094	0.91	2.195			1.239	0.985
		1.231	0.864	1.513	1.992			0.676	0.875
		1.078	1.034	1.579	1.998			1.743	1.168
		1.445	0.937	0.854	2.304			2.179	1.305
		1.412	1.159	1.729	2.176			1.8	1.58
		1.302	1.454	1.488	1.568			1.265	1.385
		1.438	1.512	0.671	1.448			1.921	2.478
		1.234	1.028	1.115	1.275			1.937	1.269
		1.179	1.789	1.411	1.117			2.212	1.257
		2.021	1.652	0.85	2.261			1.767	1.182
		1.721	0.715	0.827	0.979			1.158	1.106
		1.027	1.505	1.13	1.952			1.315	1.017
		1.35	1.383	0.945	1.025			0.95	0.875
		1.203	1.788	0.917	1.664			1.254	1.246
		0.666	1.669	0.839	0.948			1.752	0.841
		1.312	1.702	1.471	0.932			2.053	1.324
		1.198	0.822	1.303	2.339			1.506	2.147
		1.772	1.117	1.023	1.177			1.496	1.135
		1.293	1.328	1.373	1.822			1.354	1.034
		1.627	0.933	1.161	1.201			1.586	0.986
		1.266	1.283	1.381	0.972			1.749	1.205
		1.151	2.467	1.29	1.3			1.28	3.21
		1.224	1.265	1.148	1.287			1.954	2.198
		0.731	1.491	1.081	1.219			2.146	1.69
		1.062	1.014	1.457	1.908			1.839	2.787
		0.907	1.12	0.974	2.181			0.811	1.297
		1.227	1.342	1.178	1.413			0.992	0.954
		1.148	1.026	1.144	1.548			1.925	1.38
		1.395	1.449	1.032	0.779			2.296	1.273
		1.188	1.406	1.373	0.966			1.656	0.76
		1.76	1.333	1.16	1.478			1.249	0.691
		1.443	1.215	1.269	3.311			1.121	0.862
		0.852	1.325	1.015	0.881			2.677	1.01
		1.469	0.963	1.312	3.197			0.893	1.089
		0.845	1.239	1.259	1.013			2.216	3.425
		0.83	2.1	1.114	1.643			1.351	2.294
		1.241	1.549	1.2	1.119			1.199	2.513
		1.624	1.505	1.401	1.142			1.196	1.342
		1.295	1.443	0.799	2.15			1.469	1.126
		1.109	1.266	0.763	3.017			0.909	1.281
		1.078	1.096	1.337	2.614			1.964	1.118
		1.291	1.373	1.453	1.032			2.333	0.892
		1.185	1.596	1.051	1.047			2.254	1.024
		1.275	1.035	0.964	2.637			1.799	0.878
		1.656	1.291	1.328	1.179			0.853	1.353
		1.165	1.049	1.286	3.027			1.172	1.357
		1.24	1.006	1.28	2.27			1.475	1.047
		1.762	0.756	1.321	1.42			2.114	1.074
		1.261	1.299	1.257	1.768			1.482	1.704
		1.066	1.211	0.989	1.51			1.209	0.993
		2.008	1.14	1.005	1.177			2.191	1.117
		1.129	1.289	1.42	0.893			1.956	1.606
		1.322	1.425	0.979	2.611			2.544	2.722
		1.751	1.333	0.92	1.547			1.884	1.05
		1.194	1.389	1.196	2.701			0.781	0.744
		1.013	1.558	1.409	2.915			1.535	0.859
		1.526	1.35	0.965	2.883			1.261	1.256
		1.406	1.287	1.19	1.831			1.703	0.873
		1.831	1.861	1.05	2.297			1.069	0.774
		1.982	1.304	1.084	1.618			1.496	1.271
		1.344	1.224	1.392	0.99			1.808	1.404
		1.245	1.365	2.199	2.133			1.214	0.784
		1.301	1.343	1.448	2.676			1.298	1.217
		1.082	1.353	1.075	1.984			1.153	2.26
		1.16	1.518	0.926	1.721			1.434	1.209
		1.184	1.334	1.19	1.166			2.263	1.424
		0.806	1.318	1.026	1.93			1.665	1.882
		1.23	1.302	0.886	2.627			2.015	1.054
		1.554	1.237	1.335	1.982			1.902	1.03
		1.07	1.125	1.265	1.37			2.221	1.74
		1.946	1.64	1.559	1.534			2.132	1.038
		1.424	1.554	1.348	1.507			1.774	1.406
		1.328	1.305	1.424	1.642			1.288	0.829
		1.589	1.712	0.843				2.303	1.294
		2.339	1.265	0.677				2.498	1.629
		0.833	1.394	1.023				1.451	0.714
		1.033	1.254	1.308				0.924	1.241
		0.999	1.409	1.221				2.46	1.288
		0.907	1.389	1.101				1.251	1.696
		1.387	1.805	1.154				1.447	1.175
		1.425	1.869	1.145				1.449	1.063
		1.241	0.989	1.133				1.791	1.298
		1.302	0.961	1.104				2.096	0.98
		1.643	1.037	1.621				1.459	1.148
		1.155	2.75	0.81				1.041	1.353
		1.287	0.988	0.926				1.317	0.95
		0.82	1.418	1.095				1.569	1.261
		1.272	2.798	1.34				2.07	1.224
		1.854	1.404	1.204				0.878	1.307
		2.029	1.774	1.246				2.008	1.768
		1.109	1.261	1.293				1.456	1.352
		1.015	1.143	1.666				1.941	0.934
		1.173	1.09	0.928				1.617	1.163
		1.112	1.377	1.383				2.074	0.763
		1.292	1.608	1.587				1.715	0.935
		1.368	1.558	1.161				2.422	1.053
		1.259	1.177	0.934				2.504	1.239
		1.158	1.429	1.096				2.106	1.088
		1.169	1.02	1.33				1.171	1.244
		1.207	1	1.25				1.43	1.087
		1.503	1.529	1.316				1.936	1.078
		1.23	1.426	1.15				1.044	1.197
		1.455	1.219	1.319				3.314	1.076
		1.334	1.085	1.125				2.311	1.983
		0.943	1.744	0.907				1.661	1.257
		0.909	1.553	1.491				2.022	1.196
		1.124	1.381	1.413				0.932	2.553
		0.925	2.863	1.699				2.395	1.498
		1.121	0.828	1.048				2.621	0.738
		1.664	1.418	0.94				2.514	0.964
		0.787	1.45	1.299				2.318	1.33
		1.706	1.852	1.137				2.184	1.215
		0.793	1.806	1.33				1.733	1.116
		1.177	0.947	1.079				1.57	1.563
		0.945	0.987	0.941				1.844	1.285
		1.077	1.257	0.955				1.8	1.17
		0.953	1.304	0.982				1.944	0.73
		1.208	2.968	0.876				1.843	1.027
		1.32	1.745	1.218				1.613	1.066
		1.31	0.796	1.119				1.901	1.2
		1.274	1.415	1.217				2.557	1.35
		1.352	1.289	1.567				1.614	1.622
		0.91	1.41	1.524				2.352	0.626
		1.232	1.526	2.023				1.86	1.551
		1.383	1.374	1.606				1.55	1.223
		1.749	0.906	1.316				2.522	1.276
		1.205	1.6	1.061				2.366	1.096
		1.376	1.379	1.074				1.607	0.617
		1.696	1.516	1.591				2.417	0.849
		1.603	2.788	1.426				2.53	1.061
		1.206	2.392	1.634				1.511	1.251
		1.163	1.163	1.161				2.727	1.127
		1.526	0.964	1.281				1.556	1.268
		0.925	1.318	1.039				1.756	0.831
		1.348	0.666	1.379				1.506	1.312
		1.046	1.574	0.588				1.629	1.359
		0.999	0.937	1.49				3.019	0.958
		1.205	1.247	1.255				1.982	0.941
		1.726	1.042	0.987				2.569	1.019
		1.811	1.321	1.125				2.298	1.427
		1.811	1.61	1.079				1.622	0.909
		0.805	1.555	0.757				2.044	1.329
		1.624	1.213	1.369				1.075	1.412
		1.787	1.583	1.792				2.564	0.865
		1.037	1.4	1.575				1.742	0.814
		1.058	1.482	1.454				2.11	1.676
		0.751	1.358	1.291				1.167	1.262
		0.895	1.618	1.364				1.445	1.027
		1.128	1.963	1.246				1.184	1.209
		1.07	1.268	0.751				1.128	1.152
		0.881	1.136	0.972				1.989	0.92
		1.249	1.434	1.008				0.997	1.563
		0.846	1.266	2.705				1.284	1.924
		1.029	1.548	2.337				1.202	1.128
		0.958	1.559	1.606				1.285	1.164
		1.094	1.749	1.572				1.793	0.655
		1.196	1.145	0.988				3.336	1.311
		1.229	1.211	1.539				1.826	1.18
		0.961	1.624	0.623				1.295	1.55
		1.193	1.549	0.899				1.047	1.593
		1.323	1.505	0.778				1.597	2.668
		1.492	1.412	0.804				2.48	1.136
		1.223	1.164	1.526				2.327	1.104
		1.325	1.136	0.73				0.781	0.752
		1.284	1.32	1.624				1.274	1.185
		1.308	0.99	0.998				2.549	1.212
		0.877	1.446	1.624				1.095	1.689
		1.329	1.61	1.096				1.895	0.892
		1.497	1.762	1.018				3.471	1.227
		0.974	1.395	1.208				2.117	1.156
		0.991	1.445	0.704				1.669	1.159
		1.005	1.524	0.935				1.338	0.918
		1.546	1.482	1.153				1.798	0.86
		1.407	1.51	2.177				2.204	1.172
		1.38	1.259	1.469				2.343	1.389
		1.5	1.767	1.002				1.858	1.22
		1.539	3.622	1.509				1.787	1.277
		0.774	1.425	1.337				2.023	1.058
		1.071	2.198	1.368				1.421	1.103
		1.347	0.83	1.587				1.503	1.166
		0.889	0.739	1.154				1.489	1.404
		1.5	0.945	1.464				2.926	1.367
		1.204	1.18	1.065				1.65	1.278
		1.814	0.907	0.682				2.333	1.214
		0.988	1.044	0.894				1.351	1.063
		0.773	1.508	0.904				3.074	1.26
		1.648	2.305	2.257				2.508	1.371
		1.235	1.259	1.255				2.057	1.007
		0.999	1.14	1.227				2.273	1.447
		1.144	0.953	0.984				0.532	1.385
		1.504	0.915	0.924				1.217	0.786
		1.463	1.158	0.667				1.416	1.602
		1.303	0.953	1.509				2.063	1.814
		1.184	1.381	1.219				1.82	1.392
		1.14	1.708	0.877				1.925	0.938
		0.979	1.474	1.206				1.249	1.517
		1.095	1.498	1.225				1.41	1.019
		0.868	1.542	0.782				2.051	1.376
		1.576	1.541	0.902				1.243	1.072
		1.113	1.558	1.126				2.344	1.218
		1.453	1.693	1.109				1.595	0.636
		1.704	1.241	1.109				1.382	1.071
		1.28	1.452	0.761				1.802	1.479
		1.535	1.471	1.166				1.708	2.242
		1.225	1.853	0.925				1.603	1.158
		1.309	1.506	1.287				2.384	1.111
		1.329	1.368	0.699				1.967	1.244
		1.558	1.334	0.64				2.28	1.507
		2.48	1.533	1.192				1.74	1.411
		1.789	1.574	0.655				0.933	1.029
		1.666	1.03	0.583				0.797	1.317
		1.345	2.421	1.137				0.889	1.179
		1.263	1.178	1.339				1.149	1.245
		1.592	1.364	1.342				0.831	0.878
		1.31	1.384	1				1.677	1.559
		1.923	1.26	0.968				2.216	1.016
		1.431	1.681	0.843				1.461	1.077
		1.158	1.018	1.279				1.385	0.874
		1.119	1.01	1.161				0.759	1.441
		1.223	1.301	1.3				1.705	0.935
		1.042	1.389	1.181				1.258	1.356
		1.38	1.783	1.388				1.6	1.388
		0.934	2.483	0.999				1.676	0.97
		1.437	1.051	1.215				1.767	1.157
		1.155	1.441	1.345				1.627	1.688
		0.899	1.135	1.358				1.219	1.379
		1.326	1.552	0.906				1.019	1.481
		1.305	1.686	1.052				1.827	1.236
		0.977	1.212	1.297				1.958	1.273
		1.022	1.751	1.408				2.435	0.701
		0.884	1.473	1.088				1.55	1.679
		0.902	1.18	0.664				2.159	1.144
		1.187	1.137	0.95				1.088	1.112
		1.241	1.343	1.029				2.206	1.095
		1.343	1.058	0.737				2.167	1.382
		1.786	1.316	0.579				1.163	1.068
		1.089	1.512	1.041				1.975	1.196
		1.448	1.507	0.82				1.853	0.966
		1.456	1.262	1.117				1.575	1.475
		1.168	1.405	1.192				2.204	1.127
		1.285	1.07	0.815				2.564	0.798
		1.18	1.057	0.866				0.764	2.45
		1.036	1.662	0.931				1.594	1.446
		1.502	1.225	1.022				1.901	1.661
		1.217	1.421	1.325				1.58	1.412
		0.931	1.234	1.238				2.124	1.385
		1.303	2.037	1.355				0.914	1.076
		1.062	0.968	1.17				1.245	1.197
		1.365	1.222	1.185				2.034	1.261
		0.673	1.413	1.474				0.962	0.538
		2.265	1.034	1.395				1.138	0.932
		1.455	1.858	1.297				1.312	1.001
		1.484	1.246	1.382				1.127	1.047
		1.569	1.372	1.248				1.856	1.152
		1.357	1.341	1.327				0.723	1.13
		1.338	1.969	0.864				1.479	1.109
		1.414	1.837	1.254				2.053	1.066
		1.452	1.724	0.876				1.735	1.148
		1.172	1.399	0.57				1.884	1.333
		1.222	1.362	0.598				0.868	1.358
		1.409	1.643	1.03				1.707	2.59
		1.507	1.471	1.329				1.07	1.362
		1.153	1.243	1.284				1.599	0.534
		1.477	1.499	1.094				1.398	1.651
		1.284	1.119	0.913				1.257	0.904
		1.547	0.773	0.951				0.931	1.285
		0.957	0.776	0.873				1.194	1.046
		1.452	1.063	1.089				1.61	1.061
		1.267	1.058	0.925				1.803	1.545
		1.225	0.77	1.103				1.125	0.975
		1.468	0.754	0.817				1.476	0.995
		1.01	1.047	1.37				1.376	1.25
		1.087	0.836	0.858				1.554	0.974
		1.465	1.122	1.269				0.846	1.014
		1.2	0.988	1.385				1.555	1.442
		1.096	0.762	1.264				0.946	1.262
		0.877	1.003	1.17				0.824	0.64
		1.111	0.8	0.861				1.647	1.254
		1.144	1.212	0.984				2.562	1.328
		1.513	1.192	1.242				2.323	1.358
		1.461	0.911	1.319				1.567	1.172
		1.218	0.792	1.202				0.963	1.364
		1.487	0.886	1.163				1.541	1.097
		1.82	1.097	0.931				1.601	0.947
		1.283	1.178	1.196				1.055	1.941
		1.16	1.493	0.785				1.644	1.83
		0.81	0.992	1.02				1.406	1.726
		1.146	1.023	1.085				1.86	1.947
		1.713	0.967	0.919				1.575	2.466
		1.238	1.235	0.927				1.045	1.245
		1.133	1.103	0.678				0.914	1.267
		1.367	1.025	0.803				2.15	0.994
		1.225	0.756	0.775				1.359	0.752
		1.152	0.903	1.351				1.445	1.068
		1.431	1.182	0.919				1.482	0.725
		1.173	0.689	0.963				1.994	0.925
		1.065	1.014	1.141				1.318	1.362
		1.239	1.345	1.15				1.439	1.331
[truncated: 6,195 more rows]

## Sheet: Figure 3C
Figure 3C	Please see Figure 3 - figure supplement 1C - source data 1 sheet for fit data.
		Speed (µm/s)	Control	Kif13-KO	KIF13-KO mixed		Speed (µm/s)	KIF13-KO mixed	4X-KO + KIF5B		Speed (µm/s)	4X-KO + KIF5B	4X-KO + KIF13B		Speed (µm/s)	4X-KO + KIF5B	4X-KO + KIF13B	Control		Speed (µm/s)	KIF5 KO	4X-KO + KIF13B
		0	2.25115e-05	1.52968e-05	7.38217e-06		0	7.38217e-06	3.15449e-05		0	3.15449e-05	3.94035e-05		0	3.15449e-05	3.94035e-05	2.25115e-05		0	0.000242465	3.94035e-05
		0.01	2.42931e-05	1.62545e-05	8.53406e-06		0.01	8.53406e-06	3.4013e-05		0.01	3.4013e-05	4.28232e-05		0.01	3.4013e-05	4.28232e-05	2.42931e-05		0.01	0.000254563	4.28232e-05
		0.02	2.62184e-05	1.72773e-05	9.85981e-06		0.02	9.85981e-06	3.67089e-05		0.02	3.67089e-05	4.65296e-05		0.02	3.67089e-05	4.65296e-05	2.62184e-05		0.02	0.000267201	4.65296e-05
		0.03	2.83002e-05	1.83711e-05	1.13841e-05		0.03	1.13841e-05	3.96594e-05		0.03	3.96594e-05	5.05459e-05		0.03	3.96594e-05	5.05459e-05	2.83002e-05		0.03	0.000280397	5.05459e-05
		0.04	3.0553e-05	1.95427e-05	1.31349e-05		0.04	1.31349e-05	4.28946e-05		0.04	4.28946e-05	5.48972e-05		0.04	4.28946e-05	5.48972e-05	3.0553e-05		0.04	0.000294175	5.48972e-05
		0.05	3.29925e-05	2.07996e-05	1.51436e-05		0.05	1.51436e-05	4.64485e-05		0.05	4.64485e-05	5.96105e-05		0.05	4.64485e-05	5.96105e-05	3.29925e-05		0.05	0.000308555	5.96105e-05
		0.06	3.56366e-05	2.21505e-05	1.74458e-05		0.06	1.74458e-05	5.036e-05		0.06	5.036e-05	6.47147e-05		0.06	5.036e-05	6.47147e-05	3.56366e-05		0.06	0.000323561	6.47147e-05
		0.07	3.85048e-05	2.3605e-05	2.00814e-05		0.07	2.00814e-05	5.4673e-05		0.07	5.4673e-05	7.02412e-05		0.07	5.4673e-05	7.02412e-05	3.85048e-05		0.07	0.000339216	7.02412e-05
		0.08	4.16191e-05	2.51744e-05	2.30953e-05		0.08	2.30953e-05	5.94371e-05		0.08	5.94371e-05	7.62236e-05		0.08	5.94371e-05	7.62236e-05	4.16191e-05		0.08	0.000355545	7.62236e-05
		0.09	4.5004e-05	2.68712e-05	2.65377e-05		0.09	2.65377e-05	6.47087e-05		0.09	6.47087e-05	8.26981e-05		0.09	6.47087e-05	8.26981e-05	4.5004e-05		0.09	0.000372573	8.26981e-05
		0.1	4.86865e-05	2.87099e-05	3.04648e-05		0.1	3.04648e-05	7.05511e-05		0.1	7.05511e-05	8.97034e-05		0.1	7.05511e-05	8.97034e-05	4.86865e-05		0.1	0.000390326	8.97034e-05
		0.11	5.26971e-05	3.07068e-05	3.49398e-05		0.11	3.49398e-05	7.70363e-05		0.11	7.70363e-05	9.72814e-05		0.11	7.70363e-05	9.72814e-05	5.26971e-05		0.11	0.000408831	9.72814e-05
		0.12	5.70697e-05	3.28808e-05	4.00327e-05		0.12	4.00327e-05	8.42451e-05		0.12	8.42451e-05	0.000105477		0.12	8.42451e-05	0.000105477	5.70697e-05		0.12	0.000428118	0.000105477
		0.13	6.18421e-05	3.5253e-05	4.58219e-05		0.13	4.58219e-05	9.22688e-05		0.13	9.22688e-05	0.000114338		0.13	9.22688e-05	0.000114338	6.18421e-05		0.13	0.000448215	0.000114338
		0.14	6.70566e-05	3.78477e-05	5.23943e-05		0.14	5.23943e-05	0.00010121		0.14	0.00010121	0.000123915		0.14	0.00010121	0.000123915	6.70566e-05		0.14	0.000469152	0.000123915
		0.15	7.27603e-05	4.06927e-05	5.98466e-05		0.15	5.98466e-05	0.000111183		0.15	0.000111183	0.000134265		0.15	0.000111183	0.000134265	7.27603e-05		0.15	0.000490962	0.000134265
		0.16	7.90059e-05	4.38193e-05	6.82858e-05		0.16	6.82858e-05	0.000122319		0.16	0.000122319	0.000145445		0.16	0.000122319	0.000145445	7.90059e-05		0.16	0.000513679	0.000145445
		0.17	8.58521e-05	4.72633e-05	7.78305e-05		0.17	7.78305e-05	0.00013476		0.17	0.00013476	0.00015752		0.17	0.00013476	0.00015752	8.58521e-05		0.17	0.000537336	0.00015752
		0.18	9.33644e-05	5.10655e-05	8.86117e-05		0.18	8.86117e-05	0.00014867		0.18	0.00014867	0.000170556		0.18	0.00014867	0.000170556	9.33644e-05		0.18	0.00056197	0.000170556
		0.19	0.000101616	5.52719e-05	0.000100774		0.19	0.000100774	0.000164228		0.19	0.000164228	0.000184625		0.19	0.000164228	0.000184625	0.000101616		0.19	0.00058762	0.000184625
		0.2	0.000110687	5.9935e-05	0.000114476		0.2	0.000114476	0.000181635		0.2	0.000181635	0.000199804		0.2	0.000181635	0.000199804	0.000110687		0.2	0.000614326	0.000199804
		0.21	0.00012067	6.51139e-05	0.000129892		0.21	0.000129892	0.000201115		0.21	0.000201115	0.000216175		0.21	0.000201115	0.000216175	0.00012067		0.21	0.00064213	0.000216175
		0.22	0.000131664	7.08757e-05	0.000147214		0.22	0.000147214	0.000222916		0.22	0.000222916	0.000233824		0.22	0.000222916	0.000233824	0.000131664		0.22	0.000671077	0.000233824
		0.23	0.000143781	7.72962e-05	0.000166652		0.23	0.000166652	0.000247311		0.23	0.000247311	0.000252844		0.23	0.000247311	0.000252844	0.000143781		0.23	0.000701215	0.000252844
		0.24	0.000157145	8.44607e-05	0.000188436		0.24	0.000188436	0.000274605		0.24	0.000274605	0.000273334		0.24	0.000274605	0.000273334	0.000157145		0.24	0.000732593	0.000273334
		0.25	0.000171893	9.24655e-05	0.000212814		0.25	0.000212814	0.000305132		0.25	0.000305132	0.000295397		0.25	0.000305132	0.000295397	0.000171893		0.25	0.000765266	0.000295397
		0.26	0.000188178	0.000101419	0.000240061		0.26	0.000240061	0.00033926		0.26	0.00033926	0.000319145		0.26	0.00033926	0.000319145	0.000188178		0.26	0.00079929	0.000319145
		0.27	0.000206166	0.000111441	0.000270471		0.27	0.000270471	0.000377393		0.27	0.000377393	0.000344693		0.27	0.000377393	0.000344693	0.000206166		0.27	0.000834725	0.000344693
		0.28	0.000226044	0.00012267	0.000304366		0.28	0.000304366	0.000419973		0.28	0.000419973	0.000372166		0.28	0.000419973	0.000372166	0.000226044		0.28	0.000871636	0.000372166
		0.29	0.000248015	0.000135256	0.000342093		0.29	0.000342093	0.000467486		0.29	0.000467486	0.000401694		0.29	0.000467486	0.000401694	0.000248015		0.29	0.000910093	0.000401694
		0.3	0.000272304	0.000149369	0.000384029		0.3	0.000384029	0.000520459		0.3	0.000520459	0.000433416		0.3	0.000520459	0.000433416	0.000272304		0.3	0.000950168	0.000433416
		0.31	0.000299157	0.000165199	0.000430578		0.31	0.000430578	0.000579466		0.31	0.000579466	0.000467476		0.31	0.000579466	0.000467476	0.000299157		0.31	0.000991941	0.000467476
		0.32	0.000328844	0.000182956	0.000482176		0.32	0.000482176	0.000645131		0.32	0.000645131	0.000504028		0.32	0.000645131	0.000504028	0.000328844		0.32	0.0010355	0.000504028
		0.33	0.000361662	0.000202873	0.000539291		0.33	0.000539291	0.000718128		0.33	0.000718128	0.000543231		0.33	0.000718128	0.000543231	0.000361662		0.33	0.00108093	0.000543231
		0.34	0.000397932	0.000225209	0.000602425		0.34	0.000602425	0.000799186		0.34	0.000799186	0.000585254		0.34	0.000799186	0.000585254	0.000397932		0.34	0.00112833	0.000585254
		0.35	0.000438009	0.000250249	0.000672115		0.35	0.000672115	0.00088909		0.35	0.00088909	0.000630274		0.35	0.00088909	0.000630274	0.000438009		0.35	0.00117781	0.000630274
		0.36	0.000482273	0.00027831	0.000748934		0.36	0.000748934	0.000988682		0.36	0.000988682	0.000678475		0.36	0.000988682	0.000678475	0.000482273		0.36	0.00122948	0.000678475
		0.37	0.000531143	0.000309737	0.00083349		0.37	0.00083349	0.00109887		0.37	0.00109887	0.000730049		0.37	0.00109887	0.000730049	0.000531143		0.37	0.00128347	0.000730049
		0.38	0.000585068	0.000344911	0.000926431		0.38	0.000926431	0.00122061		0.38	0.00122061	0.000785198		0.38	0.00122061	0.000785198	0.000585068		0.38	0.00133989	0.000785198
		0.39	0.000644535	0.000384252	0.00102845		0.39	0.00102845	0.00135493		0.39	0.00135493	0.000844131		0.39	0.00135493	0.000844131	0.000644535		0.39	0.00139889	0.000844131
		0.4	0.000710073	0.000428214	0.00114026		0.4	0.00114026	0.00150292		0.4	0.00150292	0.000907064		0.4	0.00150292	0.000907064	0.000710073		0.4	0.00146063	0.000907064
		0.41	0.000782245	0.000477296	0.00126263		0.41	0.00126263	0.00166575		0.41	0.00166575	0.000974224		0.41	0.00166575	0.000974224	0.000782245		0.41	0.00152525	0.000974224
		0.42	0.000861662	0.000532041	0.00139637		0.42	0.00139637	0.00184462		0.42	0.00184462	0.00104584		0.42	0.00184462	0.00104584	0.000861662		0.42	0.00159293	0.00104584
		0.43	0.000948974	0.000593037	0.00154233		0.43	0.00154233	0.00204082		0.43	0.00204082	0.00112217		0.43	0.00204082	0.00112217	0.000948974		0.43	0.00166385	0.00112217
		0.44	0.00104488	0.000660921	0.00170139		0.44	0.00170139	0.00225569		0.44	0.00225569	0.00120344		0.44	0.00225569	0.00120344	0.00104488		0.44	0.0017382	0.00120344
		0.45	0.00115012	0.000736382	0.00187447		0.45	0.00187447	0.00249064		0.45	0.00249064	0.00128991		0.45	0.00249064	0.00128991	0.00115012		0.45	0.0018162	0.00128991
		0.46	0.00126548	0.000820163	0.00206254		0.46	0.00206254	0.00274712		0.46	0.00274712	0.00138186		0.46	0.00274712	0.00138186	0.00126548		0.46	0.00189804	0.00138186
		0.47	0.00139181	0.000913061	0.00226659		0.47	0.00226659	0.00302666		0.47	0.00302666	0.00147954		0.47	0.00302666	0.00147954	0.00139181		0.47	0.00198398	0.00147954
		0.48	0.00152999	0.00101593	0.00248765		0.48	0.00248765	0.00333081		0.48	0.00333081	0.00158324		0.48	0.00333081	0.00158324	0.00152999		0.48	0.00207424	0.00158324
		0.49	0.00168095	0.00112969	0.0027268		0.49	0.0027268	0.00366118		0.49	0.00366118	0.00169323		0.49	0.00366118	0.00169323	0.00168095		0.49	0.00216908	0.00169323
		0.5	0.00184568	0.00125531	0.00298513		0.5	0.00298513	0.00401941		0.5	0.00401941	0.0018098		0.5	0.00401941	0.0018098	0.00184568		0.5	0.00226877	0.0018098
		0.51	0.00202521	0.00139383	0.00326376		0.51	0.00326376	0.00440719		0.51	0.00440719	0.00193324		0.51	0.00440719	0.00193324	0.00202521		0.51	0.00237358	0.00193324
		0.52	0.00222061	0.00154634	0.00356384		0.52	0.00356384	0.0048262		0.52	0.0048262	0.00206385		0.52	0.0048262	0.00206385	0.00222061		0.52	0.0024838	0.00206385
		0.53	0.00243302	0.00171402	0.00388653		0.53	0.00388653	0.00527816		0.53	0.00527816	0.00220192		0.53	0.00527816	0.00220192	0.00243302		0.53	0.00259973	0.00220192
		0.54	0.00266358	0.00189807	0.00423302		0.54	0.00423302	0.00576478		0.54	0.00576478	0.00234774		0.54	0.00576478	0.00234774	0.00266358		0.54	0.00272167	0.00234774
		0.55	0.00291352	0.0020998	0.0046045		0.55	0.0046045	0.00628776		0.55	0.00628776	0.00250163		0.55	0.00628776	0.00250163	0.00291352		0.55	0.00284995	0.00250163
		0.56	0.00318407	0.00232053	0.00500216		0.56	0.00500216	0.00684879		0.56	0.00684879	0.00266386		0.56	0.00684879	0.00266386	0.00318407		0.56	0.00298488	0.00266386
		0.57	0.00347651	0.00256168	0.0054272		0.57	0.0054272	0.00744952		0.57	0.00744952	0.00283476		0.57	0.00744952	0.00283476	0.00347651		0.57	0.0031268	0.00283476
		0.58	0.00379214	0.0028247	0.0058808		0.58	0.0058808	0.00809153		0.58	0.00809153	0.00301459		0.58	0.00809153	0.00301459	0.00379214		0.58	0.00327602	0.00301459
		0.59	0.00413228	0.0031111	0.00636414		0.59	0.00636414	0.00877636		0.59	0.00877636	0.00320367		0.59	0.00877636	0.00320367	0.00413228		0.59	0.00343288	0.00320367
		0.6	0.0044983	0.00342244	0.00687836		0.6	0.00687836	0.00950548		0.6	0.00950548	0.00340227		0.6	0.00950548	0.00340227	0.0044983		0.6	0.0035977	0.00340227
		0.61	0.00489152	0.00376031	0.00742457		0.61	0.00742457	0.0102802		0.61	0.0102802	0.00361066		0.61	0.0102802	0.00361066	0.00489152		0.61	0.00377082	0.00361066
		0.62	0.00531332	0.00412634	0.00800387		0.62	0.00800387	0.0111018		0.62	0.0111018	0.00382913		0.62	0.0111018	0.00382913	0.00531332		0.62	0.00395255	0.00382913
		0.63	0.00576505	0.0045222	0.00861728		0.63	0.00861728	0.0119714		0.63	0.0119714	0.00405794		0.63	0.0119714	0.00405794	0.00576505		0.63	0.00414319	0.00405794
		0.64	0.00624804	0.00494958	0.00926577		0.64	0.00926577	0.01289		0.64	0.01289	0.00429732		0.64	0.01289	0.00429732	0.00624804		0.64	0.00434303	0.00429732
		0.65	0.00676361	0.00541015	0.00995024		0.65	0.00995024	0.0138582		0.65	0.0138582	0.00454753		0.65	0.0138582	0.00454753	0.00676361		0.65	0.00455236	0.00454753
		0.66	0.00731303	0.00590563	0.0106715		0.66	0.0106715	0.0148768		0.66	0.0148768	0.00480877		0.66	0.0148768	0.00480877	0.00731303		0.66	0.00477141	0.00480877
		0.67	0.00789754	0.00643768	0.0114304		0.67	0.0114304	0.015946		0.67	0.015946	0.00508127		0.67	0.015946	0.00508127	0.00789754		0.67	0.00500043	0.00508127
		0.68	0.00851832	0.00700798	0.0122274		0.68	0.0122274	0.0170662		0.68	0.0170662	0.0053652		0.68	0.0170662	0.0053652	0.00851832		0.68	0.00523961	0.0053652
		0.69	0.00917647	0.00761816	0.0130632		0.69	0.0130632	0.0182371		0.69	0.0182371	0.00566074		0.69	0.0182371	0.00566074	0.00917647		0.69	0.00548912	0.00566074
		0.7	0.00987301	0.00826978	0.0139381		0.7	0.0139381	0.0194585		0.7	0.0194585	0.00596804		0.7	0.0194585	0.00596804	0.00987301		0.7	0.00574909	0.00596804
		0.71	0.0106089	0.00896438	0.0148525		0.71	0.0148525	0.0207297		0.71	0.0207297	0.00628723		0.71	0.0207297	0.00628723	0.0106089		0.71	0.0060196	0.00628723
		0.72	0.0113849	0.00970338	0.0158065		0.72	0.0158065	0.0220498		0.72	0.0220498	0.0066184		0.72	0.0220498	0.0066184	0.0113849		0.72	0.0063007	0.0066184
		0.73	0.0122018	0.0104881	0.0168001		0.73	0.0168001	0.0234176		0.73	0.0234176	0.00696164		0.73	0.0234176	0.00696164	0.0122018		0.73	0.00659238	0.00696164
		0.74	0.0130601	0.0113199	0.0178331		0.74	0.0178331	0.0248316		0.74	0.0248316	0.00731699		0.74	0.0248316	0.00731699	0.0130601		0.74	0.00689458	0.00731699
		0.75	0.0139601	0.0121997	0.0189052		0.75	0.0189052	0.02629		0.75	0.02629	0.00768448		0.75	0.02629	0.00768448	0.0139601		0.75	0.00720719	0.00768448
		0.76	0.0149023	0.0131285	0.020016		0.76	0.020016	0.0277905		0.76	0.0277905	0.00806409		0.76	0.0277905	0.00806409	0.0149023		0.76	0.00753004	0.00806409
		0.77	0.0158867	0.0141072	0.0211647		0.77	0.0211647	0.0293306		0.77	0.0293306	0.00845579		0.77	0.0293306	0.00845579	0.0158867		0.77	0.00786289	0.00845579
		0.78	0.0169131	0.0151363	0.0223505		0.78	0.0223505	0.0309075		0.78	0.0309075	0.00885951		0.78	0.0309075	0.00885951	0.0169131		0.78	0.00820545	0.00885951
		0.79	0.0179812	0.0162162	0.0235723		0.79	0.0235723	0.032518		0.79	0.032518	0.00927513		0.79	0.032518	0.00927513	0.0179812		0.79	0.00855735	0.00927513
		0.8	0.0190905	0.0173472	0.0248288		0.8	0.0248288	0.0341584		0.8	0.0341584	0.00970251		0.8	0.0341584	0.00970251	0.0190905		0.8	0.00891816	0.00970251
		0.81	0.0202403	0.0185291	0.0261185		0.81	0.0261185	0.0358251		0.81	0.0358251	0.0101415		0.81	0.0358251	0.0101415	0.0202403		0.81	0.00928739	0.0101415
		0.82	0.0214295	0.0197618	0.0274398		0.82	0.0274398	0.0375137		0.82	0.0375137	0.0105918		0.82	0.0375137	0.0105918	0.0214295		0.82	0.00966447	0.0105918
		0.83	0.022657	0.0210445	0.0287908		0.83	0.0287908	0.0392198		0.83	0.0392198	0.0110533		0.83	0.0392198	0.0110533	0.022657		0.83	0.0100488	0.0110533
		0.84	0.0239213	0.0223765	0.0301693		0.84	0.0301693	0.0409385		0.84	0.0409385	0.0115257		0.84	0.0409385	0.0115257	0.0239213		0.84	0.0104396	0.0115257
		0.85	0.0252207	0.0237567	0.0315731		0.85	0.0315731	0.0426649		0.85	0.0426649	0.0120085		0.85	0.0426649	0.0120085	0.0252207		0.85	0.0108362	0.0120085
		0.86	0.0265531	0.0251835	0.0329995		0.86	0.0329995	0.0443935		0.86	0.0443935	0.0125015		0.86	0.0443935	0.0125015	0.0265531		0.86	0.0112378	0.0125015
		0.87	0.0279164	0.0266553	0.034446		0.87	0.034446	0.0461188		0.87	0.0461188	0.0130043		0.87	0.0461188	0.0130043	0.0279164		0.87	0.0116435	0.0130043
		0.88	0.0293081	0.0281699	0.0359094		0.88	0.0359094	0.047835		0.88	0.047835	0.0135164		0.88	0.047835	0.0135164	0.0293081		0.88	0.0120524	0.0135164
		0.89	0.0307253	0.0297249	0.0373867		0.89	0.0373867	0.0495363		0.89	0.0495363	0.0140374		0.89	0.0495363	0.0140374	0.0307253		0.89	0.0124634	0.0140374
		0.9	0.0321652	0.0313177	0.0388746		0.9	0.0388746	0.0512165		0.9	0.0512165	0.0145667		0.9	0.0512165	0.0145667	0.0321652		0.9	0.0128758	0.0145667
		0.91	0.0336245	0.032945	0.0403696		0.91	0.0403696	0.0528695		0.91	0.0528695	0.0151039		0.91	0.0528695	0.0151039	0.0336245		0.91	0.0132882	0.0151039
		0.92	0.0350996	0.0346036	0.041868		0.92	0.041868	0.0544891		0.92	0.0544891	0.0156483		0.92	0.0544891	0.0156483	0.0350996		0.92	0.0136998	0.0156483
		0.93	0.0365869	0.0362896	0.0433661		0.93	0.0433661	0.0560689		0.93	0.0560689	0.0161993		0.93	0.0560689	0.0161993	0.0365869		0.93	0.0141095	0.0161993
		0.94	0.0380824	0.0379991	0.0448598		0.94	0.0448598	0.0576027		0.94	0.0576027	0.0167564		0.94	0.0576027	0.0167564	0.0380824		0.94	0.0145161	0.0167564
		0.95	0.0395821	0.0397276	0.0463452		0.95	0.0463452	0.0590843		0.95	0.0590843	0.0173188		0.95	0.0590843	0.0173188	0.0395821		0.95	0.0149186	0.0173188
		0.96	0.0410816	0.0414706	0.047818		0.96	0.047818	0.0605076		0.96	0.0605076	0.0178859		0.96	0.0605076	0.0178859	0.0410816		0.96	0.0153159	0.0178859
		0.97	0.0425764	0.043223	0.049274		0.97	0.049274	0.0618667		0.97	0.0618667	0.018457		0.97	0.0618667	0.018457	0.0425764		0.97	0.015707	0.018457
		0.98	0.0440619	0.0449798	0.050709		0.98	0.050709	0.0631557		0.98	0.0631557	0.0190312		0.98	0.0631557	0.0190312	0.0440619		0.98	0.0160907	0.0190312
		0.99	0.0455335	0.0467354	0.0521184		0.99	0.0521184	0.0643692		0.99	0.0643692	0.019608		0.99	0.0643692	0.019608	0.0455335		0.99	0.0164662	0.019608
		1	0.0469863	0.0484843	0.053498		1	0.053498	0.0655018		1	0.0655018	0.0201865		1	0.0655018	0.0201865	0.0469863		1	0.0168325	0.0201865
		1.01	0.0484154	0.0502206	0.0548435		1.01	0.0548435	0.0665486		1.01	0.0665486	0.0207659		1.01	0.0665486	0.0207659	0.0484154		1.01	0.0171886	0.0207659
		1.02	0.0498159	0.0519385	0.0561503		1.02	0.0561503	0.0675049		1.02	0.0675049	0.0213454		1.02	0.0675049	0.0213454	0.0498159		1.02	0.0175338	0.0213454
		1.03	0.0511828	0.0536317	0.0574142		1.03	0.0574142	0.0683664		1.03	0.0683664	0.0219243		1.03	0.0683664	0.0219243	0.0511828		1.03	0.0178672	0.0219243
		1.04	0.0525113	0.0552941	0.058631		1.04	0.058631	0.0691294		1.04	0.0691294	0.0225017		1.04	0.0691294	0.0225017	0.0525113		1.04	0.0181882	0.0225017
		1.05	0.0537966	0.0569195	0.0597966		1.05	0.0597966	0.0697903		1.05	0.0697903	0.0230768		1.05	0.0697903	0.0230768	0.0537966		1.05	0.0184962	0.0230768
		1.06	0.0550338	0.0585017	0.0609069		1.06	0.0609069	0.0703464		1.06	0.0703464	0.0236488		1.06	0.0703464	0.0236488	0.0550338		1.06	0.0187907	0.0236488
		1.07	0.0562182	0.0600345	0.0619579		1.07	0.0619579	0.0707951		1.07	0.0707951	0.024217		1.07	0.0707951	0.024217	0.0562182		1.07	0.0190712	0.024217
		1.08	0.0573454	0.0615117	0.0629461		1.08	0.0629461	0.0711346		1.08	0.0711346	0.0247804		1.08	0.0711346	0.0247804	0.0573454		1.08	0.0193373	0.0247804
		1.09	0.0584111	0.0629274	0.0638678		1.09	0.0638678	0.0713634		1.09	0.0713634	0.0253384		1.09	0.0713634	0.0253384	0.0584111		1.09	0.019589	0.0253384
		1.1	0.0594111	0.0642757	0.0647198		1.1	0.0647198	0.0714806		1.1	0.0714806	0.0258902		1.1	0.0714806	0.0258902	0.0594111		1.1	0.019826	0.0258902
		1.11	0.0603415	0.0655508	0.0654988		1.11	0.0654988	0.071486		1.11	0.071486	0.0264349		1.11	0.071486	0.0264349	0.0603415		1.11	0.0200483	0.0264349
		1.12	0.0611986	0.0667475	0.0662022		1.12	0.0662022	0.0713799		1.12	0.0713799	0.026972		1.12	0.0713799	0.026972	0.0611986		1.12	0.020256	0.026972
		1.13	0.0619792	0.0678605	0.0668272		1.13	0.0668272	0.0711629		1.13	0.0711629	0.0275006		1.13	0.0711629	0.0275006	0.0619792		1.13	0.0204492	0.0275006
		1.14	0.0626802	0.068885	0.0673716		1.14	0.0673716	0.0708364		1.14	0.0708364	0.0280201		1.14	0.0708364	0.0280201	0.0626802		1.14	0.0206283	0.0280201
		1.15	0.0632989	0.0698164	0.0678333		1.15	0.0678333	0.0704023		1.15	0.0704023	0.0285298		1.15	0.0704023	0.0285298	0.0632989		1.15	0.0207936	0.0285298
		1.16	0.0638329	0.0706507	0.0682107		1.16	0.0682107	0.0698629		1.16	0.0698629	0.0290291		1.16	0.0698629	0.0290291	0.0638329		1.16	0.0209455	0.0290291
		1.17	0.0642803	0.0713842	0.0685024		1.17	0.0685024	0.069221		1.17	0.069221	0.0295174		1.17	0.069221	0.0295174	0.0642803		1.17	0.0210846	0.0295174
		1.18	0.0646395	0.0720135	0.0687073		1.18	0.0687073	0.0684801		1.18	0.0684801	0.0299941		1.18	0.0684801	0.0299941	0.0646395		1.18	0.0212114	0.0299941
		1.19	0.0649093	0.0725359	0.0688247		1.19	0.0688247	0.0676438		1.19	0.0676438	0.0304588		1.19	0.0676438	0.0304588	0.0649093		1.19	0.0213268	0.0304588
		1.2	0.0650889	0.0729491	0.0688542		1.2	0.0688542	0.0667164		1.2	0.0667164	0.0309108		1.2	0.0667164	0.0309108	0.0650889		1.2	0.0214314	0.0309108
		1.21	0.0651778	0.0732512	0.0687957		1.21	0.0687957	0.0657024		1.21	0.0657024	0.0313499		1.21	0.0657024	0.0313499	0.0651778		1.21	0.021526	0.0313499
		1.22	0.0651762	0.0734409	0.0686497		1.22	0.0686497	0.0646067		1.22	0.0646067	0.0317755		1.22	0.0646067	0.0317755	0.0651762		1.22	0.0216115	0.0317755
		1.23	0.0650845	0.0735176	0.0684166		1.23	0.0684166	0.0634346		1.23	0.0634346	0.0321873		1.23	0.0634346	0.0321873	0.0650845		1.23	0.0216887	0.0321873
		1.24	0.0649035	0.0734809	0.0680976		1.24	0.0680976	0.0621915		1.24	0.0621915	0.032585		1.24	0.0621915	0.032585	0.0649035		1.24	0.0217587	0.032585
		1.25	0.0646345	0.0733311	0.0676938		1.25	0.0676938	0.0608831		1.25	0.0608831	0.0329682		1.25	0.0608831	0.0329682	0.0646345		1.25	0.0218222	0.0329682
		1.26	0.0642791	0.0730692	0.067207		1.26	0.067207	0.0595154		1.26	0.0595154	0.0333368		1.26	0.0595154	0.0333368	0.0642791		1.26	0.0218803	0.0333368
		1.27	0.0638393	0.0726964	0.0666391		1.27	0.0666391	0.0580943		1.27	0.0580943	0.0336906		1.27	0.0580943	0.0336906	0.0638393		1.27	0.021934	0.0336906
		1.28	0.0633176	0.0722146	0.0659923		1.28	0.0659923	0.056626		1.28	0.056626	0.0340293		1.28	0.056626	0.0340293	0.0633176		1.28	0.021984	0.0340293
		1.29	0.0627166	0.0716263	0.0652691		1.29	0.0652691	0.0551167		1.29	0.0551167	0.034353		1.29	0.0551167	0.034353	0.0627166		1.29	0.0220315	0.034353
		1.3	0.0620393	0.0709344	0.0644723		1.3	0.0644723	0.0535725		1.3	0.0535725	0.0346614		1.3	0.0535725	0.0346614	0.0620393		1.3	0.0220772	0.0346614
		1.31	0.0612892	0.070142	0.063605		1.31	0.063605	0.0519997		1.31	0.0519997	0.0349546		1.31	0.0519997	0.0349546	0.0612892		1.31	0.0221221	0.0349546
		1.32	0.0604698	0.069253	0.0626705		1.32	0.0626705	0.0504044		1.32	0.0504044	0.0352326		1.32	0.0504044	0.0352326	0.0604698		1.32	0.0221669	0.0352326
		1.33	0.059585	0.0682716	0.0616722		1.33	0.0616722	0.0487925		1.33	0.0487925	0.0354954		1.33	0.0487925	0.0354954	0.059585		1.33	0.0222126	0.0354954
		1.34	0.058639	0.0672023	0.0606137		1.34	0.0606137	0.04717		1.34	0.04717	0.035743		1.34	0.04717	0.035743	0.058639		1.34	0.0222597	0.035743
		1.35	0.0576358	0.06605	0.0594991		1.35	0.0594991	0.0455426		1.35	0.0455426	0.0359756		1.35	0.0455426	0.0359756	0.0576358		1.35	0.022309	0.0359756
		1.36	0.0565801	0.0648199	0.0583321		1.36	0.0583321	0.0439157		1.36	0.0439157	0.0361934		1.36	0.0439157	0.0361934	0.0565801		1.36	0.0223612	0.0361934
		1.37	0.0554764	0.0635174	0.057117		1.37	0.057117	0.0422946		1.37	0.0422946	0.0363964		1.37	0.0422946	0.0363964	0.0554764		1.37	0.0224168	0.0363964
		1.38	0.0543292	0.0621482	0.055858		1.38	0.055858	0.0406844		1.38	0.0406844	0.0365849		1.38	0.0406844	0.0365849	0.0543292		1.38	0.0224762	0.0365849
		1.39	0.0531435	0.0607182	0.0545592		1.39	0.0545592	0.0390897		1.39	0.0390897	0.0367592		1.39	0.0390897	0.0367592	0.0531435		1.39	0.02254	0.0367592
		1.4	0.0519239	0.0592334	0.0532252		1.4	0.0532252	0.0375151		1.4	0.0375151	0.0369193		1.4	0.0375151	0.0369193	0.0519239		1.4	0.0226086	0.0369193
		1.41	0.0506752	0.0576999	0.0518602		1.41	0.0518602	0.0359646		1.41	0.0359646	0.0370656		1.41	0.0359646	0.0370656	0.0506752		1.41	0.0226822	0.0370656
		1.42	0.0494022	0.0561238	0.0504686		1.42	0.0504686	0.0344421		1.42	0.0344421	0.0371984		1.42	0.0344421	0.0371984	0.0494022		1.42	0.022761	0.0371984
		1.43	0.0481096	0.0545114	0.0490548		1.43	0.0490548	0.0329512		1.43	0.0329512	0.037318		1.43	0.0329512	0.037318	0.0481096		1.43	0.0228453	0.037318
		1.44	0.0468019	0.0528689	0.0476229		1.44	0.0476229	0.0314948		1.44	0.0314948	0.0374245		1.44	0.0314948	0.0374245	0.0468019		1.44	0.0229351	0.0374245
		1.45	0.0454838	0.0512023	0.0461775		1.45	0.0461775	0.0300759		1.45	0.0300759	0.0375185		1.45	0.0300759	0.0375185	0.0454838		1.45	0.0230306	0.0375185
		1.46	0.0441597	0.0495177	0.0447224		1.46	0.0447224	0.028697		1.46	0.028697	0.0376001		1.46	0.028697	0.0376001	0.0441597		1.46	0.0231317	0.0376001
		1.47	0.0428337	0.0478211	0.043262		1.47	0.043262	0.0273601		1.47	0.0273601	0.0376697		1.47	0.0273601	0.0376697	0.0428337		1.47	0.0232384	0.0376697
		1.48	0.04151	0.0461182	0.0418		1.48	0.0418	0.0260672		1.48	0.0260672	0.0377275		1.48	0.0260672	0.0377275	0.04151		1.48	0.0233505	0.0377275
		1.49	0.0401925	0.0444145	0.0403403		1.49	0.0403403	0.0248196		1.49	0.0248196	0.0377741		1.49	0.0248196	0.0377741	0.0401925		1.49	0.0234678	0.0377741
		1.5	0.0388848	0.0427155	0.0388866		1.5	0.0388866	0.0236186		1.5	0.0236186	0.0378095		1.5	0.0236186	0.0378095	0.0388848		1.5	0.0235903	0.0378095
		1.51	0.0375905	0.0410261	0.0374424		1.51	0.0374424	0.022465		1.51	0.022465	0.0378342		1.51	0.022465	0.0378342	0.0375905		1.51	0.0237176	0.0378342
		1.52	0.0363127	0.0393513	0.036011		1.52	0.036011	0.0213595		1.52	0.0213595	0.0378485		1.52	0.0213595	0.0378485	0.0363127		1.52	0.0238494	0.0378485
		1.53	0.0350546	0.0376956	0.0345955		1.53	0.0345955	0.0203023		1.53	0.0203023	0.0378526		1.53	0.0203023	0.0378526	0.0350546		1.53	0.0239854	0.0378526
		1.54	0.0338188	0.0360634	0.0331991		1.54	0.0331991	0.0192935		1.54	0.0192935	0.0378469		1.54	0.0192935	0.0378469	0.0338188		1.54	0.0241254	0.0378469
		1.55	0.0326079	0.0344585	0.0318242		1.55	0.0318242	0.0183329		1.55	0.0183329	0.0378315		1.55	0.0183329	0.0378315	0.0326079		1.55	0.0242689	0.0378315
		1.56	0.0314241	0.0328846	0.0304737		1.56	0.0304737	0.0174201		1.56	0.0174201	0.0378069		1.56	0.0174201	0.0378069	0.0314241		1.56	0.0244155	0.0378069
		1.57	0.0302694	0.0313451	0.0291497		1.57	0.0291497	0.0165544		1.57	0.0165544	0.0377731		1.57	0.0165544	0.0377731	0.0302694		1.57	0.0245648	0.0377731
		1.58	0.0291457	0.0298429	0.0278545		1.58	0.0278545	0.0157352		1.58	0.0157352	0.0377306		1.58	0.0157352	0.0377306	0.0291457		1.58	0.0247165	0.0377306
		1.59	0.0280545	0.0283807	0.0265899		1.59	0.0265899	0.0149614		1.59	0.0149614	0.0376794		1.59	0.0149614	0.0376794	0.0280545		1.59	0.02487	0.0376794
		1.6	0.0269969	0.0269607	0.0253577		1.6	0.0253577	0.0142318		1.6	0.0142318	0.0376197		1.6	0.0142318	0.0376197	0.0269969		1.6	0.025025	0.0376197
		1.61	0.025974	0.0255851	0.0241593		1.61	0.0241593	0.0135453		1.61	0.0135453	0.0375518		1.61	0.0135453	0.0375518	0.025974		1.61	0.025181	0.0375518
		1.62	0.0249867	0.0242555	0.0229961		1.62	0.0229961	0.0129005		1.62	0.0129005	0.0374759		1.62	0.0129005	0.0374759	0.0249867		1.62	0.0253377	0.0374759
		1.63	0.0240355	0.0229732	0.0218692		1.63	0.0218692	0.0122959		1.63	0.0122959	0.037392		1.63	0.0122959	0.037392	0.0240355		1.63	0.0254944	0.037392
		1.64	0.0231209	0.0217394	0.0207794		1.64	0.0207794	0.0117299		1.64	0.0117299	0.0373004		1.64	0.0117299	0.0373004	0.0231209		1.64	0.0256509	0.0373004
		1.65	0.0222429	0.0205547	0.0197275		1.65	0.0197275	0.0112011		1.65	0.0112011	0.037201		1.65	0.0112011	0.037201	0.0222429		1.65	0.0258067	0.037201
		1.66	0.0214015	0.0194197	0.0187139		1.66	0.0187139	0.0107077		1.66	0.0107077	0.0370941		1.66	0.0107077	0.0370941	0.0214015		1.66	0.0259615	0.0370941
		1.67	0.0205966	0.0183347	0.017739		1.67	0.017739	0.010248		1.67	0.010248	0.0369798		1.67	0.010248	0.0369798	0.0205966		1.67	0.0261147	0.0369798
		1.68	0.0198278	0.0172995	0.016803		1.68	0.016803	0.00982042		1.68	0.00982042	0.036858		1.68	0.00982042	0.036858	0.0198278		1.68	0.026266	0.036858
		1.69	0.0190946	0.016314	0.0159059		1.69	0.0159059	0.00942317		1.69	0.00942317	0.0367289		1.69	0.00942317	0.0367289	0.0190946		1.69	0.0264151	0.0367289
		1.7	0.0183964	0.0153776	0.0150476		1.7	0.0150476	0.00905457		1.7	0.00905457	0.0365924		1.7	0.00905457	0.0365924	0.0183964		1.7	0.0265615	0.0365924
		1.71	0.0177324	0.0144898	0.0142277		1.71	0.0142277	0.00871294		1.71	0.00871294	0.0364487		1.71	0.00871294	0.0364487	0.0177324		1.71	0.026705	0.0364487
		1.72	0.0171018	0.0136498	0.0134459		1.72	0.0134459	0.00839662		1.72	0.00839662	0.0362977		1.72	0.00839662	0.0362977	0.0171018		1.72	0.0268452	0.0362977
		1.73	0.0165036	0.0128564	0.0127016		1.73	0.0127016	0.00810398		1.73	0.00810398	0.0361396		1.73	0.00810398	0.0361396	0.0165036		1.73	0.0269817	0.0361396
		1.74	0.0159367	0.0121086	0.0119942		1.74	0.0119942	0.00783343		1.74	0.00783343	0.0359741		1.74	0.00783343	0.0359741	0.0159367		1.74	0.0271143	0.0359741
		1.75	0.0154001	0.0114051	0.011323		1.75	0.011323	0.00758342		1.75	0.00758342	0.0358015		1.75	0.00758342	0.0358015	0.0154001		1.75	0.0272428	0.0358015
		1.76	0.0148925	0.0107446	0.0106871		1.76	0.0106871	0.00735247		1.76	0.00735247	0.0356216		1.76	0.00735247	0.0356216	0.0148925		1.76	0.0273668	0.0356216
		1.77	0.0144128	0.0101255	0.0100856		1.77	0.0100856	0.00713914		1.77	0.00713914	0.0354344		1.77	0.00713914	0.0354344	0.0144128		1.77	0.027486	0.0354344
		1.78	0.0139598	0.00954636	0.00951764		1.78	0.00951764	0.00694206		1.78	0.00694206	0.03524		1.78	0.00694206	0.03524	0.0139598		1.78	0.0276003	0.03524
		1.79	0.0135321	0.00900559	0.00898207		1.79	0.00898207	0.0067599		1.79	0.0067599	0.0350382		1.79	0.0067599	0.0350382	0.0135321		1.79	0.0277094	0.0350382
		1.8	0.0131285	0.00850153	0.00847785		1.8	0.00847785	0.00659143		1.8	0.00659143	0.0348292		1.8	0.00659143	0.0348292	0.0131285		1.8	0.0278131	0.0348292
		1.81	0.0127476	0.00803251	0.00800385		1.81	0.00800385	0.00643544		1.81	0.00643544	0.0346129		1.81	0.00643544	0.0346129	0.0127476		1.81	0.0279113	0.0346129
		1.82	0.0123883	0.00759685	0.00755892		1.82	0.00755892	0.00629083		1.82	0.00629083	0.0343892		1.82	0.00629083	0.0343892	0.0123883		1.82	0.0280037	0.0343892
		1.83	0.0120493	0.00719284	0.00714189		1.83	0.00714189	0.00615653		1.83	0.00615653	0.0341581		1.83	0.00615653	0.0341581	0.0120493		1.83	0.0280901	0.0341581
		1.84	0.0117292	0.00681879	0.00675157		1.84	0.00675157	0.00603156		1.84	0.00603156	0.0339197		1.84	0.00603156	0.0339197	0.0117292		1.84	0.0281705	0.0339197
		1.85	0.0114269	0.00647304	0.00638675		1.85	0.00638675	0.00591499		1.85	0.00591499	0.033674		1.85	0.00591499	0.033674	0.0114269		1.85	0.0282447	0.033674
		1.86	0.0111411	0.00615391	0.00604623		1.86	0.00604623	0.00580597		1.86	0.00580597	0.0334209		1.86	0.00580597	0.0334209	0.0111411		1.86	0.0283126	0.0334209
		1.87	0.0108708	0.00585979	0.00572881		1.87	0.00572881	0.00570368		1.87	0.00570368	0.0331604		1.87	0.00570368	0.0331604	0.0108708		1.87	0.028374	0.0331604
		1.88	0.0106148	0.0055891	0.0054333		1.88	0.0054333	0.0056074		1.88	0.0056074	0.0328926		1.88	0.0056074	0.0328926	0.0106148		1.88	0.0284288	0.0328926
		1.89	0.010372	0.00534028	0.00515854		1.89	0.00515854	0.00551644		1.89	0.00551644	0.0326176		1.89	0.00551644	0.0326176	0.010372		1.89	0.0284771	0.0326176
		1.9	0.0101414	0.00511185	0.00490335		1.9	0.00490335	0.00543016		1.9	0.00543016	0.0323353		1.9	0.00543016	0.0323353	0.0101414		1.9	0.0285186	0.0323353
		1.91	0.00992194	0.00490237	0.00466663		1.91	0.00466663	0.005348		1.91	0.005348	0.0320458		1.91	0.005348	0.0320458	0.00992194		1.91	0.0285533	0.0320458
		1.92	0.00971278	0.00471044	0.00444725		1.92	0.00444725	0.00526943		1.92	0.00526943	0.0317491		1.92	0.00526943	0.0317491	0.00971278		1.92	0.0285811	0.0317491
		1.93	0.00951301	0.00453476	0.00424415		1.93	0.00424415	0.00519397		1.93	0.00519397	0.0314455		1.93	0.00519397	0.0314455	0.00951301		1.93	0.0286021	0.0314455
		1.94	0.00932177	0.00437404	0.00405629		1.94	0.00405629	0.0051212		1.94	0.0051212	0.0311348		1.94	0.0051212	0.0311348	0.00932177		1.94	0.0286161	0.0311348
		1.95	0.00913829	0.0042271	0.00388266		1.95	0.00388266	0.00505071		1.95	0.00505071	0.0308174		1.95	0.00505071	0.0308174	0.00913829		1.95	0.0286231	0.0308174
		1.96	0.00896184	0.00409278	0.0037223		1.96	0.0037223	0.00498217		1.96	0.00498217	0.0304931		1.96	0.00498217	0.0304931	0.00896184		1.96	0.0286231	0.0304931
		1.97	0.00879173	0.00397003	0.00357428		1.97	0.00357428	0.00491525		1.97	0.00491525	0.0301623		1.97	0.00491525	0.0301623	0.00879173		1.97	0.0286161	0.0301623
		1.98	0.00862732	0.00385781	0.0034377		1.98	0.0034377	0.00484968		1.98	0.00484968	0.029825		1.98	0.00484968	0.029825	0.00862732		1.98	0.028602	0.029825
		1.99	0.00846803	0.00375519	0.00331173		1.99	0.00331173	0.00478521		1.99	0.00478521	0.0294814		1.99	0.00478521	0.0294814	0.00846803		1.99	0.0285809	0.0294814
		2	0.00831332	0.00366127	0.00319554		2	0.00319554	0.00472163		2	0.00472163	0.0291316		2	0.00472163	0.0291316	0.00831332		2	0.0285528	0.0291316
		2.01	0.00816269	0.00357523	0.00308838		2.01	0.00308838	0.00465874		2.01	0.00465874	0.0287759		2.01	0.00465874	0.0287759	0.00816269		2.01	0.0285176	0.0287759
		2.02	0.00801569	0.00349629	0.00298953		2.02	0.00298953	0.00459637		2.02	0.00459637	0.0284144		2.02	0.00459637	0.0284144	0.00801569		2.02	0.0284754	0.0284144
		2.03	0.00787191	0.00342373	0.00289828		2.03	0.00289828	0.00453439		2.03	0.00453439	0.0280473		2.03	0.00453439	0.0280473	0.00787191		2.03	0.0284262	0.0280473
		2.04	0.00773098	0.00335689	0.00281401		2.04	0.00281401	0.00447267		2.04	0.00447267	0.0276749		2.04	0.00447267	0.0276749	0.00773098		2.04	0.0283701	0.0276749
		2.05	0.00759257	0.00329517	0.00273609		2.05	0.00273609	0.00441112		2.05	0.00441112	0.0272974		2.05	0.00441112	0.0272974	0.00759257		2.05	0.0283071	0.0272974
		2.06	0.00745638	0.00323799	0.00266397		2.06	0.00266397	0.00434963		2.06	0.00434963	0.026915		2.06	0.00434963	0.026915	0.00745638		2.06	0.0282371	0.026915
		2.07	0.00732215	0.00318485	0.00259711		2.07	0.00259711	0.00428815		2.07	0.00428815	0.026528		2.07	0.00428815	0.026528	0.00732215		2.07	0.0281604	0.026528
		2.08	0.00718964	0.00313527	0.00253502		2.08	0.00253502	0.00422662		2.08	0.00422662	0.0261366		2.08	0.00422662	0.0261366	0.00718964		2.08	0.0280768	0.0261366
		2.09	0.00705865	0.00308882	0.00247723		2.09	0.00247723	0.00416499		2.09	0.00416499	0.0257412		2.09	0.00416499	0.0257412	0.00705865		2.09	0.0279866	0.0257412
		2.1	0.006929	0.00304512	0.00242332		2.1	0.00242332	0.00410323		2.1	0.00410323	0.0253419		2.1	0.00410323	0.0253419	0.006929		2.1	0.0278896	0.0253419
		2.11	0.00680055	0.0030038	0.00237289		2.11	0.00237289	0.00404132		2.11	0.00404132	0.0249391		2.11	0.00404132	0.0249391	0.00680055		2.11	0.0277861	0.0249391
		2.12	0.00667317	0.00296454	0.00232558		2.12	0.00232558	0.00397925		2.12	0.00397925	0.024533		2.12	0.00397925	0.024533	0.00667317		2.12	0.0276761	0.024533
		2.13	0.00654675	0.00292707	0.00228105		2.13	0.00228105	0.00391701		2.13	0.00391701	0.024124		2.13	0.00391701	0.024124	0.00654675		2.13	0.0275597	0.024124
		2.14	0.00642121	0.00289112	0.00223899		2.14	0.00223899	0.0038546		2.14	0.0038546	0.0237124		2.14	0.0038546	0.0237124	0.00642121		2.14	0.0274369	0.0237124
		2.15	0.00629648	0.00285645	0.00219912		2.15	0.00219912	0.00379203		2.15	0.00379203	0.0232984		2.15	0.00379203	0.0232984	0.00629648		2.15	0.0273079	0.0232984
		2.16	0.0061725	0.00282287	0.00216119		2.16	0.00216119	0.00372931		2.16	0.00372931	0.0228824		2.16	0.00372931	0.0228824	0.0061725		2.16	0.0271726	0.0228824
		2.17	0.00604924	0.00279019	0.00212495		2.17	0.00212495	0.00366647		2.17	0.00366647	0.0224648		2.17	0.00366647	0.0224648	0.00604924		2.17	0.0270313	0.0224648
		2.18	0.00592667	0.00275824	0.0020902		2.18	0.0020902	0.00360351		2.18	0.00360351	0.0220457		2.18	0.00360351	0.0220457	0.00592667		2.18	0.0268841	0.0220457
		2.19	0.00580478	0.00272688	0.00205674		2.19	0.00205674	0.00354047		2.19	0.00354047	0.0216256		2.19	0.00354047	0.0216256	0.00580478		2.19	0.026731	0.0216256
		2.2	0.00568358	0.00269599	0.00202439		2.2	0.00202439	0.00347737		2.2	0.00347737	0.0212048		2.2	0.00347737	0.0212048	0.00568358		2.2	0.0265721	0.0212048
		2.21	0.00556306	0.00266546	0.00199301		2.21	0.00199301	0.00341424		2.21	0.00341424	0.0207835		2.21	0.00341424	0.0207835	0.00556306		2.21	0.0264076	0.0207835
		2.22	0.00544324	0.00263519	0.00196246		2.22	0.00196246	0.00335111		2.22	0.00335111	0.0203621		2.22	0.00335111	0.0203621	0.00544324		2.22	0.0262375	0.0203621
		2.23	0.00532414	0.0026051	0.0019326		2.23	0.0019326	0.00328803		2.23	0.00328803	0.0199409		2.23	0.00328803	0.0199409	0.00532414		2.23	0.0260621	0.0199409
		2.24	0.0052058	0.00257513	0.00190333		2.24	0.00190333	0.00322501		2.24	0.00322501	0.0195203		2.24	0.00322501	0.0195203	0.0052058		2.24	0.0258814	0.0195203
		2.25	0.00508823	0.0025452	0.00187455		2.25	0.00187455	0.00316209		2.25	0.00316209	0.0191004		2.25	0.00316209	0.0191004	0.00508823		2.25	0.0256955	0.0191004
		2.26	0.00497149	0.00251528	0.00184617		2.26	0.00184617	0.00309932		2.26	0.00309932	0.0186817		2.26	0.00309932	0.0186817	0.00497149		2.26	0.0255046	0.0186817
		2.27	0.0048556	0.00248533	0.00181813		2.27	0.00181813	0.00303672		2.27	0.00303672	0.0182645		2.27	0.00303672	0.0182645	0.0048556		2.27	0.0253088	0.0182645
		2.28	0.00474062	0.0024553	0.00179035		2.28	0.00179035	0.00297433		2.28	0.00297433	0.0178489		2.28	0.00297433	0.0178489	0.00474062		2.28	0.0251082	0.0178489
		2.29	0.00462658	0.00242517	0.00176278		2.29	0.00176278	0.00291219		2.29	0.00291219	0.0174354		2.29	0.00291219	0.0174354	0.00462658		2.29	0.024903	0.0174354
		2.3	0.00451354	0.00239493	0.00173538		2.3	0.00173538	0.00285034		2.3	0.00285034	0.0170241		2.3	0.00285034	0.0170241	0.00451354		2.3	0.0246933	0.0170241
		2.31	0.00440154	0.00236455	0.0017081		2.31	0.0017081	0.0027888		2.31	0.0027888	0.0166155		2.31	0.0027888	0.0166155	0.00440154		2.31	0.0244793	0.0166155
		2.32	0.00429063	0.00233404	0.00168091		2.32	0.00168091	0.00272761		2.32	0.00272761	0.0162097		2.32	0.00272761	0.0162097	0.00429063		2.32	0.0242611	0.0162097
		2.33	0.00418084	0.00230337	0.00165379		2.33	0.00165379	0.00266681		2.33	0.00266681	0.015807		2.33	0.00266681	0.015807	0.00418084		2.33	0.0240389	0.015807
		2.34	0.00407225	0.00227255	0.00162671		2.34	0.00162671	0.00260642		2.34	0.00260642	0.0154077		2.34	0.00260642	0.0154077	0.00407225		2.34	0.0238127	0.0154077
		2.35	0.00396488	0.00224158	0.00159966		2.35	0.00159966	0.00254649		2.35	0.00254649	0.0150119		2.35	0.00254649	0.0150119	0.00396488		2.35	0.0235828	0.0150119
		2.36	0.00385878	0.00221047	0.00157262		2.36	0.00157262	0.00248704		2.36	0.00248704	0.01462		2.36	0.00248704	0.01462	0.00385878		2.36	0.0233493	0.01462
		2.37	0.003754	0.00217921	0.0015456		2.37	0.0015456	0.0024281		2.37	0.0024281	0.0142322		2.37	0.0024281	0.0142322	0.003754		2.37	0.0231123	0.0142322
		2.38	0.00365059	0.00214783	0.00151857		2.38	0.00151857	0.00236971		2.38	0.00236971	0.0138486		2.38	0.00236971	0.0138486	0.00365059		2.38	0.022872	0.0138486
		2.39	0.00354857	0.00211632	0.00149156		2.39	0.00149156	0.00231188		2.39	0.00231188	0.0134695		2.39	0.00231188	0.0134695	0.00354857		2.39	0.0226286	0.0134695
		2.4	0.00344799	0.0020847	0.00146454		2.4	0.00146454	0.00225464		2.4	0.00225464	0.0130951		2.4	0.00225464	0.0130951	0.00344799		2.4	0.0223822	0.0130951
		2.41	0.00334889	0.00205297	0.00143754		2.41	0.00143754	0.00219804		2.41	0.00219804	0.0127256		2.41	0.00219804	0.0127256	0.00334889		2.41	0.0221329	0.0127256
		2.42	0.0032513	0.00202117	0.00141055		2.42	0.00141055	0.00214207		2.42	0.00214207	0.012361		2.42	0.00214207	0.012361	0.0032513		2.42	0.021881	0.012361
		2.43	0.00315525	0.00198929	0.00138359		2.43	0.00138359	0.00208678		2.43	0.00208678	0.0120017		2.43	0.00208678	0.0120017	0.00315525		2.43	0.0216265	0.0120017
		2.44	0.00306078	0.00195736	0.00135666		2.44	0.00135666	0.00203218		2.44	0.00203218	0.0116478		2.44	0.00203218	0.0116478	0.00306078		2.44	0.0213697	0.0116478
		2.45	0.00296791	0.00192538	0.00132977		2.45	0.00132977	0.00197828		2.45	0.00197828	0.0112993		2.45	0.00197828	0.0112993	0.00296791		2.45	0.0211107	0.0112993
		2.46	0.00287667	0.00189338	0.00130293		2.46	0.00130293	0.00192512		2.46	0.00192512	0.0109564		2.46	0.00192512	0.0109564	0.00287667		2.46	0.0208495	0.0109564
		2.47	0.00278708	0.00186138	0.00127617		2.47	0.00127617	0.00187272		2.47	0.00187272	0.0106193		2.47	0.00187272	0.0106193	0.00278708		2.47	0.0205865	0.0106193
		2.48	0.00269915	0.00182938	0.00124948		2.48	0.00124948	0.00182107		2.48	0.00182107	0.0102881		2.48	0.00182107	0.0102881	0.00269915		2.48	0.0203218	0.0102881
		2.49	0.00261292	0.0017974	0.00122289		2.49	0.00122289	0.00177021		2.49	0.00177021	0.00996282		2.49	0.00177021	0.00996282	0.00261292		2.49	0.0200554	0.00996282
		2.5	0.0025284	0.00176547	0.00119641		2.5	0.00119641	0.00172015		2.5	0.00172015	0.0096436		2.5	0.00172015	0.0096436	0.0025284		2.5	0.0197876	0.0096436
		2.51	0.00244559	0.0017336	0.00117005		2.51	0.00117005	0.0016709		2.51	0.0016709	0.0093305		2.51	0.0016709	0.0093305	0.00244559		2.51	0.0195185	0.0093305
		2.52	0.00236451	0.0017018	0.00114383		2.52	0.00114383	0.00162247		2.52	0.00162247	0.00902361		2.52	0.00162247	0.00902361	0.00236451		2.52	0.0192483	0.00902361
		2.53	0.00228516	0.00167009	0.00111776		2.53	0.00111776	0.00157487		2.53	0.00157487	0.00872297		2.53	0.00157487	0.00872297	0.00228516		2.53	0.018977	0.00872297
		2.54	0.00220756	0.00163849	0.00109186		2.54	0.00109186	0.00152811		2.54	0.00152811	0.00842864		2.54	0.00152811	0.00842864	0.00220756		2.54	0.0187049	0.00842864
		2.55	0.00213171	0.00160702	0.00106614		2.55	0.00106614	0.00148221		2.55	0.00148221	0.00814067		2.55	0.00148221	0.00814067	0.00213171		2.55	0.0184322	0.00814067
		2.56	0.00205761	0.00157568	0.00104061		2.56	0.00104061	0.00143716		2.56	0.00143716	0.00785907		2.56	0.00143716	0.00785907	0.00205761		2.56	0.0181588	0.00785907
		2.57	0.00198526	0.00154449	0.00101529		2.57	0.00101529	0.00139297		2.57	0.00139297	0.00758387		2.57	0.00139297	0.00758387	0.00198526		2.57	0.0178851	0.00758387
		2.58	0.00191465	0.00151348	0.000990201		2.58	0.000990201	0.00134966		2.58	0.00134966	0.00731509		2.58	0.00134966	0.00731509	0.00191465		2.58	0.0176111	0.00731509
		2.59	0.00184578	0.00148264	0.000965344		2.59	0.000965344	0.00130722		2.59	0.00130722	0.00705272		2.59	0.00130722	0.00705272	0.00184578		2.59	0.017337	0.00705272
		2.6	0.00177865	0.00145201	0.000940736		2.6	0.000940736	0.00126565		2.6	0.00126565	0.00679677		2.6	0.00126565	0.00679677	0.00177865		2.6	0.0170629	0.00679677
		2.61	0.00171325	0.00142158	0.000916389		2.61	0.000916389	0.00122496		2.61	0.00122496	0.00654723		2.61	0.00122496	0.00654723	0.00171325		2.61	0.0167889	0.00654723
		2.62	0.00164956	0.00139138	0.000892315		2.62	0.000892315	0.00118515		2.62	0.00118515	0.00630407		2.62	0.00118515	0.00630407	0.00164956		2.62	0.0165152	0.00630407
		2.63	0.00158758	0.00136142	0.000868526		2.63	0.000868526	0.00114622		2.63	0.00114622	0.00606726		2.63	0.00114622	0.00606726	0.00158758		2.63	0.0162419	0.00606726
		2.64	0.00152729	0.00133171	0.000845031		2.64	0.000845031	0.00110816		2.64	0.00110816	0.00583677		2.64	0.00110816	0.00583677	0.00152729		2.64	0.0159692	0.00583677
		2.65	0.00146868	0.00130226	0.000821843		2.65	0.000821843	0.00107098		2.65	0.00107098	0.00561257		2.65	0.00107098	0.00561257	0.00146868		2.65	0.0156971	0.00561257
		2.66	0.00141173	0.00127308	0.000798969		2.66	0.000798969	0.00103467		2.66	0.00103467	0.0053946		2.66	0.00103467	0.0053946	0.00141173		2.66	0.0154258	0.0053946
		2.67	0.00135642	0.00124419	0.00077642		2.67	0.00077642	0.000999232		2.67	0.000999232	0.0051828		2.67	0.000999232	0.0051828	0.00135642		2.67	0.0151554	0.0051828
		2.68	0.00130274	0.00121559	0.000754204		2.68	0.000754204	0.000964655		2.68	0.000964655	0.00497713		2.68	0.000964655	0.00497713	0.00130274		2.68	0.0148861	0.00497713
		2.69	0.00125066	0.00118729	0.000732328		2.69	0.000732328	0.000930938		2.69	0.000930938	0.00477751		2.69	0.000930938	0.00477751	0.00125066		2.69	0.0146178	0.00477751
		2.7	0.00120016	0.00115931	0.000710801		2.7	0.000710801	0.000898073		2.7	0.000898073	0.00458387		2.7	0.000898073	0.00458387	0.00120016		2.7	0.0143509	0.00458387
		2.71	0.00115121	0.00113165	0.000689628		2.71	0.000689628	0.000866055		2.71	0.000866055	0.00439614		2.71	0.000866055	0.00439614	0.00115121		2.71	0.0140853	0.00439614
		2.72	0.00110381	0.00110432	0.000668816		2.72	0.000668816	0.000834875		2.72	0.000834875	0.00421425		2.72	0.000834875	0.00421425	0.00110381		2.72	0.0138212	0.00421425
		2.73	0.00105791	0.00107734	0.000648371		2.73	0.000648371	0.000804526		2.73	0.000804526	0.00403809		2.73	0.000804526	0.00403809	0.00105791		2.73	0.0135586	0.00403809
		2.74	0.0010135	0.0010507	0.000628297		2.74	0.000628297	0.000774998		2.74	0.000774998	0.00386759		2.74	0.000774998	0.00386759	0.0010135		2.74	0.0132977	0.00386759
		2.75	0.000970551	0.00102441	0.000608598		2.75	0.000608598	0.000746284		2.75	0.000746284	0.00370265		2.75	0.000746284	0.00370265	0.000970551		2.75	0.0130386	0.00370265
		2.76	0.000929033	0.000998486	0.00058928		2.76	0.00058928	0.000718374		2.76	0.000718374	0.00354319		2.76	0.000718374	0.00354319	0.000929033		2.76	0.0127813	0.00354319
		2.77	0.00088892	0.000972928	0.000570344		2.77	0.000570344	0.000691256		2.77	0.000691256	0.00338909		2.77	0.000691256	0.00338909	0.00088892		2.77	0.012526	0.00338909
		2.78	0.000850184	0.000947742	0.000551794		2.78	0.000551794	0.000664921		2.78	0.000664921	0.00324027		2.78	0.000664921	0.00324027	0.000850184		2.78	0.0122727	0.00324027
		2.79	0.000812797	0.000922933	0.000533632		2.79	0.000533632	0.000639357		2.79	0.000639357	0.00309662		2.79	0.000639357	0.00309662	0.000812797		2.79	0.0120216	0.00309662
		2.8	0.00077673	0.000898507	0.000515859		2.8	0.000515859	0.000614553		2.8	0.000614553	0.00295802		2.8	0.000614553	0.00295802	0.00077673		2.8	0.0117726	0.00295802
		2.81	0.000741954	0.000874467	0.000498477		2.81	0.000498477	0.000590497		2.81	0.000590497	0.00282439		2.81	0.000590497	0.00282439	0.000741954		2.81	0.011526	0.00282439
		2.82	0.000708439	0.000850817	0.000481485		2.82	0.000481485	0.000567177		2.82	0.000567177	0.0026956		2.82	0.000567177	0.0026956	0.000708439		2.82	0.0112817	0.0026956
		2.83	0.000676156	0.00082756	0.000464886		2.83	0.000464886	0.000544581		2.83	0.000544581	0.00257155		2.83	0.000544581	0.00257155	0.000676156		2.83	0.0110398	0.00257155
		2.84	0.000645075	0.0008047	0.000448677		2.84	0.000448677	0.000522695		2.84	0.000522695	0.00245212		2.84	0.000522695	0.00245212	0.000645075		2.84	0.0108004	0.00245212
		2.85	0.000615166	0.000782239	0.000432858		2.85	0.000432858	0.000501506		2.85	0.000501506	0.00233721		2.85	0.000501506	0.00233721	0.000615166		2.85	0.0105635	0.00233721
		2.86	0.000586399	0.000760179	0.000417428		2.86	0.000417428	0.000481003		2.86	0.000481003	0.0022267		2.86	0.000481003	0.0022267	0.000586399		2.86	0.0103293	0.0022267
		2.87	0.000558744	0.000738521	0.000402386		2.87	0.000402386	0.00046117		2.87	0.00046117	0.00212048		2.87	0.00046117	0.00212048	0.000558744		2.87	0.0100978	0.00212048
		2.88	0.000532172	0.000717267	0.000387729		2.88	0.000387729	0.000441994		2.88	0.000441994	0.00201843		2.88	0.000441994	0.00201843	0.000532172		2.88	0.00986895	0.00201843
		2.89	0.000506651	0.000696417	0.000373455		2.89	0.000373455	0.000423463		2.89	0.000423463	0.00192045		2.89	0.000423463	0.00192045	0.000506651		2.89	0.00964291	0.00192045
		2.9	0.000482153	0.000675973	0.000359561		2.9	0.000359561	0.000405561		2.9	0.000405561	0.00182642		2.9	0.000405561	0.00182642	0.000482153		2.9	0.0094197	0.00182642
		2.91	0.000458649	0.000655933	0.000346044		2.91	0.000346044	0.000388275		2.91	0.000388275	0.00173622		2.91	0.000388275	0.00173622	0.000458649		2.91	0.00919936	0.00173622
		2.92	0.000436108	0.000636299	0.0003329		2.92	0.0003329	0.000371591		2.92	0.000371591	0.00164975		2.92	0.000371591	0.00164975	0.000436108		2.92	0.00898194	0.00164975
		2.93	0.000414502	0.000617068	0.000320127		2.93	0.000320127	0.000355495		2.93	0.000355495	0.0015669		2.93	0.000355495	0.0015669	0.000414502		2.93	0.00876746	0.0015669
		2.94	0.000393803	0.000598241	0.000307719		2.94	0.000307719	0.000339973		2.94	0.000339973	0.00148755		2.94	0.000339973	0.00148755	0.000393803		2.94	0.00855598	0.00148755
		2.95	0.00037398	0.000579816	0.000295673		2.95	0.000295673	0.000325011		2.95	0.000325011	0.00141159		2.95	0.000325011	0.00141159	0.00037398		2.95	0.00834751	0.00141159
		2.96	0.000355008	0.000561791	0.000283983		2.96	0.000283983	0.000310595		2.96	0.000310595	0.00133892		2.96	0.000310595	0.00133892	0.000355008		2.96	0.00814209	0.00133892
		2.97	0.000336857	0.000544165	0.000272645		2.97	0.000272645	0.00029671		2.97	0.00029671	0.00126943		2.97	0.00029671	0.00126943	0.000336857		2.97	0.00793974	0.00126943
		2.98	0.000319502	0.000526935	0.000261655		2.98	0.000261655	0.000283343		2.98	0.000283343	0.00120302		2.98	0.000283343	0.00120302	0.000319502		2.98	0.0077405	0.00120302
		2.99	0.000302913	0.000510099	0.000251005		2.99	0.000251005	0.000270481		2.99	0.000270481	0.00113958		2.99	0.000270481	0.00113958	0.000302913		2.99	0.00754437	0.00113958
		3	0.000287067	0.000493654	0.000240692		3	0.000240692	0.000258108		3	0.000258108	0.00107901		3	0.000258108	0.00107901	0.000287067		3	0.00735138	0.00107901
		3.01	0.000271936	0.000477597	0.000230709		3.01	0.000230709	0.000246213		3.01	0.000246213	0.0010212		3.01	0.000246213	0.0010212	0.000271936		3.01	0.00716153	0.0010212
		3.02	0.000257495	0.000461925	0.000221051		3.02	0.000221051	0.00023478		3.02	0.00023478	0.000966069		3.02	0.00023478	0.000966069	0.000257495		3.02	0.00697485	0.000966069
		3.03	0.000243719	0.000446635	0.000211712		3.03	0.000211712	0.000223797		3.03	0.000223797	0.000913508		3.03	0.000223797	0.000913508	0.000243719		3.03	0.00679135	0.000913508
		3.04	0.000230584	0.000431722	0.000202686		3.04	0.000202686	0.000213251		3.04	0.000213251	0.000863425		3.04	0.000213251	0.000863425	0.000230584		3.04	0.00661102	0.000863425
		3.05	0.000218066	0.000417183	0.000193965		3.05	0.000193965	0.000203127		3.05	0.000203127	0.000815728		3.05	0.000203127	0.000815728	0.000218066		3.05	0.00643387	0.000815728
		3.06	0.000206141	0.000403014	0.000185545		3.06	0.000185545	0.000193415		3.06	0.000193415	0.000770326		3.06	0.000193415	0.000770326	0.000206141		3.06	0.00625991	0.000770326
		3.07	0.000194788	0.00038921	0.000177419		3.07	0.000177419	0.0001841		3.07	0.0001841	0.00072713		3.07	0.0001841	0.00072713	0.000194788		3.07	0.00608914	0.00072713
		3.08	0.000183983	0.000375768	0.00016958		3.08	0.00016958	0.00017517		3.08	0.00017517	0.000686053		3.08	0.00017517	0.000686053	0.000183983		3.08	0.00592154	0.000686053
		3.09	0.000173704	0.000362681	0.000162022		3.09	0.000162022	0.000166612		3.09	0.000166612	0.00064701		3.09	0.000166612	0.00064701	0.000173704		3.09	0.00575713	0.00064701
		3.1	0.000163932	0.000349947	0.000154738		3.1	0.000154738	0.000158415		3.1	0.000158415	0.00060992		3.1	0.000158415	0.00060992	0.000163932		3.1	0.00559588	0.00060992
		3.11	0.000154645	0.000337559	0.000147722		3.11	0.000147722	0.000150567		3.11	0.000150567	0.000574703		3.11	0.000150567	0.000574703	0.000154645		3.11	0.00543779	0.000574703
		3.12	0.000145823	0.000325513	0.000140967		3.12	0.000140967	0.000143056		3.12	0.000143056	0.00054128		3.12	0.000143056	0.00054128	0.000145823		3.12	0.00528285	0.00054128
		3.13	0.000137447	0.000313803	0.000134467		3.13	0.000134467	0.00013587		3.13	0.00013587	0.000509575		3.13	0.00013587	0.000509575	0.000137447		3.13	0.00513105	0.000509575
		3.14	0.000129498	0.000302425	0.000128215		3.14	0.000128215	0.000128999		3.14	0.000128999	0.000479516		3.14	0.000128999	0.000479516	0.000129498		3.14	0.00498236	0.000479516
		3.15	0.000121958	0.000291372	0.000122203		3.15	0.000122203	0.00012243		3.15	0.00012243	0.000451031		3.15	0.00012243	0.000451031	0.000121958		3.15	0.00483678	0.000451031
		3.16	0.000114809	0.000280641	0.000116427		3.16	0.000116427	0.000116154		3.16	0.000116154	0.000424051		3.16	0.000116154	0.000424051	0.000114809		3.16	0.00469428	0.000424051
		3.17	0.000108034	0.000270224	0.000110879		3.17	0.000110879	0.00011016		3.17	0.00011016	0.000398509		3.17	0.00011016	0.000398509	0.000108034		3.17	0.00455484	0.000398509
		3.18	0.000101616	0.000260116	0.000105552		3.18	0.000105552	0.000104437		3.18	0.000104437	0.00037434		3.18	0.000104437	0.00037434	0.000101616		3.18	0.00441844	0.00037434
		3.19	9.55399e-05	0.000250312	0.000100441		3.19	0.000100441	9.89752e-05		3.19	9.89752e-05	0.000351481		3.19	9.89752e-05	0.000351481	9.55399e-05		3.19	0.00428506	0.000351481
		3.2	8.97896e-05	0.000240806	9.5539e-05		3.2	9.5539e-05	9.37653e-05		3.2	9.37653e-05	0.000329873		3.2	9.37653e-05	0.000329873	8.97896e-05		3.2	0.00415467	0.000329873
		3.21	8.43501e-05	0.000231591	9.08392e-05		3.21	9.08392e-05	8.87974e-05		3.21	8.87974e-05	0.000309456		3.21	8.87974e-05	0.000309456	8.43501e-05		3.21	0.00402724	0.000309456
		3.22	7.92071e-05	0.000222664	8.63357e-05		3.22	8.63357e-05	8.40623e-05		3.22	8.40623e-05	0.000290175		3.22	8.40623e-05	0.000290175	7.92071e-05		3.22	0.00390274	0.000290175
		3.23	7.43467e-05	0.000214017	8.20223e-05		3.23	8.20223e-05	7.95507e-05		3.23	7.95507e-05	0.000271975		3.23	7.95507e-05	0.000271975	7.43467e-05		3.23	0.00378115	0.000271975
		3.24	6.97554e-05	0.000205644	7.7893e-05		3.24	7.7893e-05	7.5254e-05		3.24	7.5254e-05	0.000254804		3.24	7.5254e-05	0.000254804	6.97554e-05		3.24	0.00366244	0.000254804
		3.25	6.54204e-05	0.00019754	7.39416e-05		3.25	7.39416e-05	7.11636e-05		3.25	7.11636e-05	0.000238612		3.25	7.11636e-05	0.000238612	6.54204e-05		3.25	0.00354656	0.000238612
		3.26	6.13291e-05	0.0001897	7.01623e-05		3.26	7.01623e-05	6.72711e-05		3.26	6.72711e-05	0.00022335		3.26	6.72711e-05	0.00022335	6.13291e-05		3.26	0.0034335	0.00022335
		3.27	5.74698e-05	0.000182116	6.65493e-05		3.27	6.65493e-05	6.35685e-05		3.27	6.35685e-05	0.000208972		3.27	6.35685e-05	0.000208972	5.74698e-05		3.27	0.00332322	0.000208972
		3.28	5.38308e-05	0.000174783	6.30968e-05		3.28	6.30968e-05	6.00478e-05		3.28	6.00478e-05	0.000195433		3.28	6.00478e-05	0.000195433	5.38308e-05		3.28	0.00321567	0.000195433
		3.29	5.04013e-05	0.000167696	5.97993e-05		3.29	5.97993e-05	5.67016e-05		3.29	5.67016e-05	0.000182691		3.29	5.67016e-05	0.000182691	5.04013e-05		3.29	0.00311083	0.000182691
		3.3	4.71705e-05	0.000160848	5.66512e-05		3.3	5.66512e-05	5.35225e-05		3.3	5.35225e-05	0.000170704		3.3	5.35225e-05	0.000170704	4.71705e-05		3.3	0.00300865	0.000170704
		3.31	4.41285e-05	0.000154234	5.36471e-05		3.31	5.36471e-05	5.05032e-05		3.31	5.05032e-05	0.000159433		3.31	5.05032e-05	0.000159433	4.41285e-05		3.31	0.00290911	0.000159433
		3.32	4.12654e-05	0.000147848	5.07818e-05		3.32	5.07818e-05	4.7637e-05		3.32	4.7637e-05	0.000148841		3.32	4.7637e-05	0.000148841	4.12654e-05		3.32	0.00281216	0.000148841
		3.33	3.85719e-05	0.000141685	4.80501e-05		3.33	4.80501e-05	4.49172e-05		3.33	4.49172e-05	0.000138891		3.33	4.49172e-05	0.000138891	3.85719e-05		3.33	0.00271776	0.000138891
		3.34	3.60392e-05	0.000135738	4.5447e-05		3.34	4.5447e-05	4.23373e-05		3.34	4.23373e-05	0.000129549		3.34	4.23373e-05	0.000129549	3.60392e-05		3.34	0.00262587	0.000129549
		3.35	3.36588e-05	0.000130002	4.29675e-05		3.35	4.29675e-05	3.98912e-05		3.35	3.98912e-05	0.000120782		3.35	3.98912e-05	0.000120782	3.36588e-05		3.35	0.00253646	0.000120782
		3.36	3.14225e-05	0.000124471	4.06069e-05		3.36	4.06069e-05	3.75727e-05		3.36	3.75727e-05	0.000112558		3.36	3.75727e-05	0.000112558	3.14225e-05		3.36	0.00244948	0.000112558
		3.37	2.93226e-05	0.00011914	3.83605e-05		3.37	3.83605e-05	3.53761e-05		3.37	3.53761e-05	0.000104849		3.37	3.53761e-05	0.000104849	2.93226e-05		3.37	0.0023649	0.000104849
		3.38	2.73515e-05	0.000114003	3.62237e-05		3.38	3.62237e-05	3.32959e-05		3.38	3.32959e-05	9.76237e-05		3.38	3.32959e-05	9.76237e-05	2.73515e-05		3.38	0.00228266	9.76237e-05
		3.39	2.55024e-05	0.000109056	3.41921e-05		3.39	3.41921e-05	3.13266e-05		3.39	3.13266e-05	9.08565e-05		3.39	3.13266e-05	9.08565e-05	2.55024e-05		3.39	0.00220274	9.08565e-05
		3.4	2.37683e-05	0.000104292	3.22614e-05		3.4	3.22614e-05	2.94632e-05		3.4	2.94632e-05	8.45212e-05		3.4	2.94632e-05	8.45212e-05	2.37683e-05		3.4	0.00212508	8.45212e-05
		3.41	2.21429e-05	9.97069e-05	3.04275e-05		3.41	3.04275e-05	2.77005e-05		3.41	2.77005e-05	7.85928e-05		3.41	2.77005e-05	7.85928e-05	2.21429e-05		3.41	0.00204965	7.85928e-05
		3.42	2.062e-05	9.52948e-05	2.86861e-05		3.42	2.86861e-05	2.60338e-05		3.42	2.60338e-05	7.30481e-05		3.42	2.60338e-05	7.30481e-05	2.062e-05		3.42	0.00197641	7.30481e-05
		3.43	1.91939e-05	9.10509e-05	2.70335e-05		3.43	2.70335e-05	2.44586e-05		3.43	2.44586e-05	6.78645e-05		3.43	2.44586e-05	6.78645e-05	1.91939e-05		3.43	0.00190531	6.78645e-05
		3.44	1.7859e-05	8.69701e-05	2.54659e-05		3.44	2.54659e-05	2.29703e-05		3.44	2.29703e-05	6.30209e-05		3.44	2.29703e-05	6.30209e-05	1.7859e-05		3.44	0.0018363	6.30209e-05
		3.45	1.66099e-05	8.30476e-05	2.39794e-05		3.45	2.39794e-05	2.15648e-05		3.45	2.15648e-05	5.84972e-05		3.45	2.15648e-05	5.84972e-05	1.66099e-05		3.45	0.00176936	5.84972e-05
		3.46	1.54418e-05	7.92783e-05	2.25706e-05		3.46	2.25706e-05	2.02379e-05		3.46	2.02379e-05	5.42743e-05		3.46	2.02379e-05	5.42743e-05	1.54418e-05		3.46	0.00170443	5.42743e-05
		3.47	1.43498e-05	7.56576e-05	2.12359e-05		3.47	2.12359e-05	1.89858e-05		3.47	1.89858e-05	5.03339e-05		3.47	1.89858e-05	5.03339e-05	1.43498e-05		3.47	0.00164147	5.03339e-05
		3.48	1.33295e-05	7.21808e-05	1.99721e-05		3.48	1.99721e-05	1.78047e-05		3.48	1.78047e-05	4.66591e-05		3.48	1.78047e-05	4.66591e-05	1.33295e-05		3.48	0.00158045	4.66591e-05
		3.49	1.23766e-05	6.88434e-05	1.8776e-05		3.49	1.8776e-05	1.6691e-05		3.49	1.6691e-05	4.32334e-05		3.49	1.6691e-05	4.32334e-05	1.23766e-05		3.49	0.00152131	4.32334e-05
		3.5	1.1487e-05	6.56407e-05	1.76443e-05		3.5	1.76443e-05	1.56413e-05		3.5	1.56413e-05	4.00416e-05		3.5	1.56413e-05	4.00416e-05	1.1487e-05		3.5	0.00146402	4.00416e-05
		3.51	1.06569e-05	6.25684e-05	1.65741e-05		3.51	1.65741e-05	1.46523e-05		3.51	1.46523e-05	3.7069e-05		3.51	1.46523e-05	3.7069e-05	1.06569e-05		3.51	0.00140854	3.7069e-05
		3.52	9.8827e-06	5.96221e-05	1.55626e-05		3.52	1.55626e-05	1.37208e-05		3.52	1.37208e-05	3.4302e-05		3.52	1.37208e-05	3.4302e-05	9.8827e-06		3.52	0.00135482	3.4302e-05
		3.53	9.16089e-06	5.67977e-05	1.46069e-05		3.53	1.46069e-05	1.28439e-05		3.53	1.28439e-05	3.17275e-05		3.53	1.28439e-05	3.17275e-05	9.16089e-06		3.53	0.00130283	3.17275e-05
		3.54	8.48826e-06	5.4091e-05	1.37043e-05		3.54	1.37043e-05	1.20187e-05		3.54	1.20187e-05	2.93333e-05		3.54	1.20187e-05	2.93333e-05	8.48826e-06		3.54	0.00125252	2.93333e-05
		3.55	7.86173e-06	5.1498e-05	1.28523e-05		3.55	1.28523e-05	1.12425e-05		3.55	1.12425e-05	2.71077e-05		3.55	1.12425e-05	2.71077e-05	7.86173e-06		3.55	0.00120385	2.71077e-05
		3.56	7.27842e-06	4.90147e-05	1.20484e-05		3.56	1.20484e-05	1.05125e-05		3.56	1.05125e-05	2.504e-05		3.56	1.05125e-05	2.504e-05	7.27842e-06		3.56	0.00115678	2.504e-05
		3.57	6.73557e-06	4.66373e-05	1.12903e-05		3.57	1.12903e-05	9.82641e-06		3.57	9.82641e-06	2.31198e-05		3.57	9.82641e-06	2.31198e-05	6.73557e-06		3.57	0.00111128	2.31198e-05
		3.58	6.23061e-06	4.4362e-05	1.05755e-05		3.58	1.05755e-05	9.18175e-06		3.58	9.18175e-06	2.13374e-05		3.58	9.18175e-06	2.13374e-05	6.23061e-06		3.58	0.0010673	2.13374e-05
		3.59	5.7611e-06	4.21852e-05	9.90204e-06		3.59	9.90204e-06	8.57627e-06		3.59	8.57627e-06	1.96837e-05		3.59	8.57627e-06	1.96837e-05	5.7611e-06		3.59	0.00102481	1.96837e-05
		3.6	5.32475e-06	4.01032e-05	9.26769e-06		3.6	9.26769e-06	8.00781e-06		3.6	8.00781e-06	1.81502e-05		3.6	8.00781e-06	1.81502e-05	5.32475e-06		3.6	0.000983759	1.81502e-05
		3.61	4.9194e-06	3.81127e-05	8.67047e-06		3.61	8.67047e-06	7.47432e-06		3.61	7.47432e-06	1.67288e-05		3.61	7.47432e-06	1.67288e-05	4.9194e-06		3.61	0.000944119	1.67288e-05
		3.62	4.54301e-06	3.62102e-05	8.10846e-06		3.62	8.10846e-06	6.97384e-06		3.62	6.97384e-06	1.54118e-05		3.62	6.97384e-06	1.54118e-05	4.54301e-06		3.62	0.000905851	1.54118e-05
		3.63	4.19367e-06	3.43925e-05	7.57981e-06		3.63	7.57981e-06	6.50451e-06		3.63	6.50451e-06	1.41923e-05		3.63	6.50451e-06	1.41923e-05	4.19367e-06		3.63	0.000868917	1.41923e-05
		3.64	3.86958e-06	3.26562e-05	7.08277e-06		3.64	7.08277e-06	6.06457e-06		3.64	6.06457e-06	1.30635e-05		3.64	6.06457e-06	1.30635e-05	3.86958e-06		3.64	0.000833282	1.30635e-05
		3.65	3.56904e-06	3.09984e-05	6.61564e-06		3.65	6.61564e-06	5.65234e-06		3.65	5.65234e-06	1.20192e-05		3.65	5.65234e-06	1.20192e-05	3.56904e-06		3.65	0.000798908	1.20192e-05
		3.66	3.29047e-06	2.94161e-05	6.17683e-06		3.66	6.17683e-06	5.26621e-06		3.66	5.26621e-06	1.10535e-05		3.66	5.26621e-06	1.10535e-05	3.29047e-06		3.66	0.000765761	1.10535e-05
		3.67	3.03238e-06	2.79061e-05	5.76479e-06		3.67	5.76479e-06	4.90469e-06		3.67	4.90469e-06	1.01609e-05		3.67	4.90469e-06	1.01609e-05	3.03238e-06		3.67	0.000733807	1.01609e-05
		3.68	2.79337e-06	2.64659e-05	5.37807e-06		3.68	5.37807e-06	4.56632e-06		3.68	4.56632e-06	9.33622e-06		3.68	4.56632e-06	9.33622e-06	2.79337e-06		3.68	0.000703011	9.33622e-06
		3.69	2.57212e-06	2.50925e-05	5.01526e-06		3.69	5.01526e-06	4.24976e-06		3.69	4.24976e-06	8.57471e-06		3.69	4.24976e-06	8.57471e-06	2.57212e-06		3.69	0.000673339	8.57471e-06
		3.7	2.36741e-06	2.37833e-05	4.67503e-06		3.7	4.67503e-06	3.95371e-06		3.7	3.95371e-06	7.87183e-06		3.7	3.95371e-06	7.87183e-06	2.36741e-06		3.7	0.000644758	7.87183e-06
		3.71	2.17809e-06	2.25357e-05	4.35612e-06		3.71	4.35612e-06	3.67695e-06		3.71	3.67695e-06	7.22338e-06		3.71	3.67695e-06	7.22338e-06	2.17809e-06		3.71	0.000617237	7.22338e-06
		3.72	2.00306e-06	2.13472e-05	4.05733e-06		3.72	4.05733e-06	3.41832e-06		3.72	3.41832e-06	6.62542e-06		3.72	3.41832e-06	6.62542e-06	2.00306e-06		3.72	0.000590743	6.62542e-06
		3.73	1.84134e-06	2.02153e-05	3.77751e-06		3.73	3.77751e-06	3.17673e-06		3.73	3.17673e-06	6.07428e-06		3.73	3.17673e-06	6.07428e-06	1.84134e-06		3.73	0.000565246	6.07428e-06
		3.74	1.69196e-06	1.91378e-05	3.51556e-06		3.74	3.51556e-06	2.95115e-06		3.74	2.95115e-06	5.56653e-06		3.74	2.95115e-06	5.56653e-06	1.69196e-06		3.74	0.000540714	5.56653e-06
		3.75	1.55406e-06	1.81123e-05	3.27046e-06		3.75	3.27046e-06	2.74059e-06		3.75	2.74059e-06	5.09897e-06		3.75	2.74059e-06	5.09897e-06	1.55406e-06		3.75	0.000517118	5.09897e-06
		3.76	1.4268e-06	1.71367e-05	3.04121e-06		3.76	3.04121e-06	2.54413e-06		3.76	2.54413e-06	4.66861e-06		3.76	2.54413e-06	4.66861e-06	1.4268e-06		3.76	0.000494428	4.66861e-06
		3.77	1.30941e-06	1.62088e-05	2.82689e-06		3.77	2.82689e-06	2.3609e-06		3.77	2.3609e-06	4.2727e-06		3.77	2.3609e-06	4.2727e-06	1.30941e-06		3.77	0.000472616	4.2727e-06
		3.78	1.20118e-06	1.53266e-05	2.62661e-06		3.78	2.62661e-06	2.19007e-06		3.78	2.19007e-06	3.90863e-06		3.78	2.19007e-06	3.90863e-06	1.20118e-06		3.78	0.000451653	3.90863e-06
		3.79	1.10144e-06	1.44881e-05	2.43954e-06		3.79	2.43954e-06	2.03086e-06		3.79	2.03086e-06	3.57401e-06		3.79	2.03086e-06	3.57401e-06	1.10144e-06		3.79	0.000431513	3.57401e-06
		3.8	1.00956e-06	1.36914e-05	2.26487e-06		3.8	2.26487e-06	1.88254e-06		3.8	1.88254e-06	3.26659e-06		3.8	1.88254e-06	3.26659e-06	1.00956e-06		3.8	0.000412167	3.26659e-06
		3.81	9.24953e-07	1.29347e-05	2.10186e-06		3.81	2.10186e-06	1.74443e-06		3.81	1.74443e-06	2.98429e-06		3.81	1.74443e-06	2.98429e-06	9.24953e-07		3.81	0.000393591	2.98429e-06
		3.82	8.47087e-07	1.22162e-05	1.9498e-06		3.82	1.9498e-06	1.61586e-06		3.82	1.61586e-06	2.72519e-06		3.82	1.61586e-06	2.72519e-06	8.47087e-07		3.82	0.000375759	2.72519e-06
		3.83	7.75452e-07	1.15341e-05	1.808e-06		3.83	1.808e-06	1.49622e-06		3.83	1.49622e-06	2.48749e-06		3.83	1.49622e-06	2.48749e-06	7.75452e-07		3.83	0.000358645	2.48749e-06
		3.84	7.09578e-07	1.08869e-05	1.67584e-06		3.84	1.67584e-06	1.38494e-06		3.84	1.38494e-06	2.26951e-06		3.84	1.38494e-06	2.26951e-06	7.09578e-07		3.84	0.000342225	2.26951e-06
		3.85	6.4903e-07	1.02729e-05	1.55271e-06		3.85	1.55271e-06	1.28147e-06		3.85	1.28147e-06	2.06973e-06		3.85	1.28147e-06	2.06973e-06	6.4903e-07		3.85	0.000326475	2.06973e-06
		3.86	5.93401e-07	9.69073e-06	1.43805e-06		3.86	1.43805e-06	1.1853e-06		3.86	1.1853e-06	1.88669e-06		3.86	1.1853e-06	1.88669e-06	5.93401e-07		3.86	0.000311373	1.88669e-06
		3.87	5.42313e-07	9.1388e-06	1.33131e-06		3.87	1.33131e-06	1.09595e-06		3.87	1.09595e-06	1.71909e-06		3.87	1.09595e-06	1.71909e-06	5.42313e-07		3.87	0.000296895	1.71909e-06
		3.88	4.95418e-07	8.61574e-06	1.232e-06		3.88	1.232e-06	1.01297e-06		3.88	1.01297e-06	1.56568e-06		3.88	1.01297e-06	1.56568e-06	4.95418e-07		3.88	0.000283019	1.56568e-06
		3.89	4.52388e-07	8.1202e-06	1.13964e-06		3.89	1.13964e-06	9.35933e-07		3.89	9.35933e-07	1.42533e-06		3.89	9.35933e-07	1.42533e-06	4.52388e-07		3.89	0.000269725	1.42533e-06
		3.9	4.12924e-07	7.65089e-06	1.05378e-06		3.9	1.05378e-06	8.6444e-07		3.9	8.6444e-07	1.29699e-06		3.9	8.6444e-07	1.29699e-06	4.12924e-07		3.9	0.000256991	1.29699e-06
		3.91	3.76745e-07	7.20656e-06	9.73989e-07		3.91	9.73989e-07	7.98119e-07		3.91	7.98119e-07	1.17969e-06		3.91	7.98119e-07	1.17969e-06	3.76745e-07		3.91	0.000244798	1.17969e-06
		3.92	3.43592e-07	6.78601e-06	8.99878e-07		3.92	8.99878e-07	7.36619e-07		3.92	7.36619e-07	1.07252e-06		3.92	7.36619e-07	1.07252e-06	3.43592e-07		3.92	0.000233124	1.07252e-06
		3.93	3.13227e-07	6.38811e-06	8.3107e-07		3.93	8.3107e-07	6.79611e-07		3.93	6.79611e-07	9.74655e-07		3.93	6.79611e-07	9.74655e-07	3.13227e-07		3.93	0.000221952	9.74655e-07
		3.94	2.85425e-07	6.01175e-06	7.67213e-07		3.94	7.67213e-07	6.26788e-07		3.94	6.26788e-07	8.8533e-07		3.94	6.26788e-07	8.8533e-07	2.85425e-07		3.94	0.000211263	8.8533e-07
		3.95	2.59983e-07	5.65588e-06	7.07977e-07		3.95	7.07977e-07	5.77861e-07		3.95	5.77861e-07	8.03836e-07		3.95	5.77861e-07	8.03836e-07	2.59983e-07		3.95	0.000201038	8.03836e-07
		3.96	2.3671e-07	5.3195e-06	6.5305e-07		3.96	6.5305e-07	5.3256e-07		3.96	5.3256e-07	7.29522e-07		3.96	5.3256e-07	7.29522e-07	2.3671e-07		3.96	0.000191261	7.29522e-07
		3.97	2.1543e-07	5.00163e-06	6.02141e-07		3.97	6.02141e-07	4.90632e-07		3.97	4.90632e-07	6.61786e-07		3.97	4.90632e-07	6.61786e-07	2.1543e-07		3.97	0.000181914	6.61786e-07
		3.98	1.95982e-07	4.70136e-06	5.54976e-07		3.98	5.54976e-07	4.51841e-07		3.98	4.51841e-07	6.00074e-07		3.98	4.51841e-07	6.00074e-07	1.95982e-07		3.98	0.00017298	6.00074e-07
		3.99	1.78215e-07	4.41781e-06	5.11299e-07		3.99	5.11299e-07	4.15967e-07		3.99	4.15967e-07	5.43877e-07		3.99	4.15967e-07	5.43877e-07	1.78215e-07		3.99	0.000164444	5.43877e-07
		4	1.61991e-07	4.15012e-06	4.70869e-07		4	4.70869e-07	3.82802e-07		4	3.82802e-07	4.92725e-07		4	3.82802e-07	4.92725e-07	1.61991e-07		4	0.00015629	4.92725e-07

## Sheet: Figure 3D
Figure 3D
(µm/s)		Speed (µm/s)	Slow component (mean)	Slow component (SD)	Fast component (mean)	Fast component (SD)
		Control	1.202	0.2562	1.707	0.4896
		KIF13-KO	1.229	0.2517	1.893	0.5799
		KIF13-KO mixed	1.196	0.2778	1.957	0.4974
		KIF5-KO	1.091	0.221	1.956	0.6332
		4X-KO + KIF13B	1.227	0.303	1.758	0.4759
		4X-KO + KIF5B	1.1	0.2474	1.704	0.5251
		Fraction	Slow component	Fast component
		Control	0.768668	0.231332
		KIF13-KO	0.910922	0.0890775
		KIF13-KO mixed	0.946109	0.0538911
		KIF5-KO	0.0924778	0.907522
		4X-KO + KIF13B	0.222591	0.777409
		4X-KO + KIF5B	0.856373	0.143627

## Sheet: Figure 3E
Figure 3E
(µm/s)
		4X-KO + KIF13B-380	4X-KO + KIF5B-560
		2.11749	1.381
		2.34274	1.3973
		2.0898	1.4455
		2.01096	1.3986
		1.86388	1.4558
		1.81821	1.3938
		2.03151	1.4483
		1.94396	1.4846
		1.68076	1.3211
		2.1707	1.3928
		2.21451	1.3093
		2.2949	1.3902
		2.43063	1.3562
		2.56463	1.3365
		1.84038	1.4187
		1.7998	1.3877
		2.37926	1.4055
		2.2391	1.5082
		1.90207	1.6898
		2.32006	1.4543
		2.12797	1.4024
		1.89587	1.3286
			1.3249
			1.3051
			1.2903
			1.4682
			1.317
			1.3827
			1.3828
			1.415

## Sheet: Figure 3H
Figure 3H
(µm/s)
		KIF5B	1.1	1.4	1.8	KIF13B
		0.9383	0.9269	1.2088	1.3793	1.5421
		0.9223	1	1.1892	1.6369	1.8721
		0.8952	0.9567	1.3349	1.6072	1.8795
		0.8752	0.9846	1.1608	1.4488	1.729
		0.8373	0.9851	1.0616	1.4841	1.7456
		0.7761	0.9716	1.3346	1.6589	1.7282
		0.7844	0.824	1.2195	1.5939	1.6955
		0.8095	0.832	1.3728	1.6867	1.6813
		0.9317	0.8042	1.5043	1.4302	1.6277
		0.8295	0.9279	1.0747	1.4236	1.6684
		0.8354	1.1406	1.4811	1.5863	1.8741
		0.839	0.8903	1.3042	1.4663	1.3885
		1.0814	1.0723	1.4727	1.38	1.7751
		0.9069	0.8724	1.3972	1.7088	1.6776
		0.8012	1.203	1.5185	1.5084	1.417
						1.472
						1.8022
						1.539
						1.6075
						1.7043
