# Supplementary material for: Concerted action of kinesins KIF5B and KIF13B promotes efficient secretory vesicle transport to microtubule plus ends
Source: eLife. 2020 Nov 11;9:e61302. doi: 10.7554/eLife.61302 (PMC7710357; doi:10.7554/eLife.61302)
Supplement: Figure 4—source data 1. [file elife-61302-fig4-data1.xlsx]

## Sheet: Figure 4B
Figure 4B
		KIF5B-560				KIF5B-FL				KIF13B-FL
			Histogram				Histogram				Histogram
		Intensity	Bin center	%		Intensity	Bin center	%		Intensity	Bin center	%
		510.243	25	0.1515		536.027	25	0		1326.65	25	0
		667.54	75	0		406.459	75	0.625		954	75	0
		659.514	125	0		442.459	125	0		551.432	125	0
		338.378	175	0.4545		588.595	175	0.9375		2725.84	175	0.2101
		362.946	225	1.5152		606.486	225	2.1875		1803.16	225	0
		449.703	275	2.8788		299.946	275	4.0625		1204.59	275	0.6303
		320.811	325	4.8485		385	325	3.4375		1207.62	325	0.2101
		464.324	375	4.8485		562.432	375	4.0625		1114.57	375	0
		527.811	425	5.303		341.757	425	5.3125		862.378	425	0.2101
		344.946	475	4.8485		250.487	475	5.9375		578.973	475	0.8403
		616.405	525	5.303		286.514	525	2.1875		928.27	525	0.2101
		547.568	575	5.7576		294.811	575	3.125		1466.08	575	0.8403
		283.189	625	5.1515		403	625	2.8125		682	625	0.4202
		335.081	675	4.8485		331.73	675	3.4375		1059.62	675	1.0504
		412.973	725	3.7879		478.811	725	1.875		1183.46	725	0.6303
		634.297	775	5.303		397.676	775	2.5		1314.43	775	1.2605
		650.378	825	5.6061		64.5405	825	3.125		1200.19	825	0.4202
		756.162	875	4.2424		400.784	875	1.875		1390.84	875	1.4706
		868.676	925	3.4848		269.135	925	3.125		884.514	925	0.8403
		555.514	975	4.0909		494.919	975	4.0625		1309.78	975	2.9412
		357.135	1025	4.3939		1422.38	1025	2.1875		1250.24	1025	1.2605
		506.189	1075	3.9394		1384.11	1075	4.0625		1295.3	1075	2.1008
		457.135	1125	1.8182		1246.51	1125	1.875		965.351	1125	2.521
		361.784	1175	1.2121		1114.3	1175	1.25		1481.32	1175	1.2605
		488.757	1225	2.1212		825.46	1225	2.8125		1826.84	1225	3.3613
		369.595	1275	1.9697		1313.84	1275	0.9375		258.568	1275	1.6807
		481.486	1325	1.2121		862.081	1325	1.25		253.513	1325	2.3109
		340.757	1375	1.6667		1364.51	1375	3.4375		163.946	1375	1.4706
		364.054	1425	1.6667		2108.86	1425	1.25		326.378	1425	1.8908
		561.46	1475	0.6061		2491.32	1475	2.1875		442.514	1475	2.3109
		489.27	1525	1.3636		1885.95	1525	0.9375		965.622	1525	1.8908
		502.541	1575	0.7576		2040.46	1575	0.625		1097.89	1575	1.2605
		577.216	1625	0.7576		2316	1625	0.9375		1394.38	1625	2.9412
		720.324	1675	0.9091		3054.95	1675	1.25		1656.51	1675	0.8403
		278.703	1725	0.303		2459.11	1725	0.3125		1662.22	1725	1.4706
		588.622	1775	0		740.649	1775	1.5625		1623.35	1775	2.3109
		362.892	1825	0.6061		947.973	1825	0.625		1616.49	1825	2.521
		212.73	1875	0.4545		1363.41	1875	1.5625		1483.84	1875	1.8908
		245.27	1925	0.303		1030.22	1925	0.3125		1160.59	1925	1.6807
		595.514	1975	0.303		1781.14	1975	0.3125		1144.7	1975	1.4706
		280.027	2025	0.1515		2555.59	2025	1.25		2647.65	2025	2.3109
		269.27	2075	0		1364.41	2075	1.25		2124.68	2075	2.1008
		617.865	2125	0		1032.08	2125	0.625		1923.57	2125	1.0504
		776.865	2175	0		2066.51	2175	0.625		2842.86	2175	1.6807
		311.973	2225	0		1265.95	2225	0.9375		2206.97	2225	2.1008
		454.784	2275	0		781.351	2275	0.9375		3424.22	2275	2.1008
		335.703	2325	0		1112.78	2325	0.3125		4689.62	2325	1.0504
		482.838	2375	0		1069.14	2375	0.3125		3772.24	2375	1.4706
		640.838	2425	0		1469.32	2425	0		3915.08	2425	1.0504
		410.703	2475	0.1515		1620.59	2475	0.9375		4653.08	2475	1.0504
		391.865	2525	0.303		962.27	2525	0.3125		1113.14	2525	0.4202
		373.946	2575	0		1095.92	2575	0.625		1330.22	2575	0.6303
		391.811	2625	0		1529.76	2625	0.625		1875.57	2625	1.4706
		355.243	2675	0		1885.62	2675	0.3125		2486.95	2675	0.6303
		502.622	2725	0		2107.76	2725	0.3125		1610.97	2725	1.2605
		255.865	2775	0		1484.49	2775	0.625		2802.57	2775	1.2605
		255.135	2825	0		1894.81	2825	0		2317.97	2825	1.4706
		512.297	2875	0		1247.84	2875	0.625		2198.03	2875	0.8403
		572.27	2925	0.1515		2003.73	2925	0		1539.65	2925	0.6303
		268.784	2975	0		2089.35	2975	0.625		2095.57	2975	1.4706
		244.378	3025	0		970.162	3025	0.3125		2757.68	3025	0.2101
		555.703	3075	0.1515		1334.11	3075	0.3125		2290.7	3075	1.4706
		602.27	3125	0		954.297	3125	0		2228.97	3125	1.4706
		413.946	3175	0		1145.97	3175	0.3125		2360.57	3175	0.4202
		305.135	3225	0		952.865	3225	0		2044.35	3225	0.4202
		513.946	3275	0.1515		466.973	3275	0		2149.62	3275	0.6303
		318.595	3325	0		1064.32	3325	0		1993.3	3325	0.8403
		391.27	3375	0		1056.73	3375	0.3125		2412.08	3375	0.2101
		442.432	3425	0		997.216	3425	0.3125		3120.03	3425	0.2101
		592.162	3475	0		1389.49	3475	0.625		3272.62	3475	0
		437.676	3525	0		586.676	3525	0		1083.84	3525	0.4202
		574	3575	0		449.378	3575	0.3125		1086.27	3575	0.2101
		363.784	3625	0.1515		1016.84	3625	0		909.486	3625	0.6303
		367.73	3675	0		550.351	3675	0		880.595	3675	0.6303
		708.622	3725	0		800.081	3725	0		949.135	3725	0.4202
		371.676	3775	0		389.216	3775	0.3125		700.297	3775	0.2101
		232.189	3825	0		948.838	3825	0.625		497.27	3825	0
		534.649	3875	0		1336.38	3875	0		759.54	3875	0.4202
		697.892	3925	0		664.162	3925	0		777.108	3925	0.8403
		332.73	3975	0		499.459	3975	0.3125		471.622	3975	0.4202
		468.351	4025	0		997.027	4025	0		599.568	4025	0.4202
		432.189	4075	0		945.162	4075	0		637.946	4075	0.4202
		305.405	4125	0		1391.65	4125	0		493.649	4125	0.8403
		355.649	4175	0		1580.41	4175	0		469.162	4175	0
		777.784	4225	0		1429.97	4225	0		284.622	4225	0.2101
		270.568	4275	0		696.081	4275	0		2947.57	4275	0.2101
		467.459	4325	0		824.46	4325	0		2917.73	4325	0.8403
		649.54	4375	0		920.135	4375	0		3135.08	4375	0.4202
		488.189	4425	0		630.162	4425	0		2670.65	4425	0.2101
		459.081	4475	0		901.378	4475	0		3594.24	4475	0.2101
		659.757	4525	0		470.405	4525	0		2802	4525	0.4202
		522.378	4575	0		667.838	4575	0		4999.59	4575	0.4202
		519.946	4625	0		789.649	4625	0		4682.51	4625	0.4202
		351.703	4675	0		345.595	4675	0		5951.41	4675	0.8403
		793.838	4725	0		728.351	4725	0		4937.08	4725	0
		521.676	4775	0		1027.81	4775	0		2891.81	4775	0.4202
		477.054	4825	0		953.703	4825	0		1301.27	4825	0
		912.811	4875	0		1164.38	4875	0		1112.46	4875	0.6303
		307.784	4925	0		1473.46	4925	0		1754.32	4925	0.2101
		490.162	4975	0		521.054	4975	0.3125		1868.57	4975	0.2101
		723.784	5025	0		839.297	5025	0		2413.92	5025	0
		480.027	5075	0		979.216	5075	0.3125		1940.92	5075	0.2101
		481.351	5125	0		1092.49	5125	0		1265.35	5125	0
		778.919	5175	0		945.784	5175	0		1875.92	5175	0.2101
		722.973	5225	0		1370.59	5225	0		2258.11	5225	0.2101
		576.919	5275	0		802.378	5275	0			5275	0.2101
		559.297	5325	0		677.595	5325	0			5325	0.2101
		427.405	5375	0		770.432	5375	0			5375	0.2101
		670.378	5425	0		202.513	5425	0			5425	0
		846.162	5475	0		747.54	5475	0			5475	0
		436.108	5525	0		930.351	5525	0			5525	0.2101
		774.27	5575	0		1035.97	5575	0			5575	0.4202
		621.568	5625	0		1077.84	5625	0			5625	0.2101
		259.784	5675	0		924.135	5675	0			5675	0.4202
		421.135	5725	0		613.946	5725	0			5725	0.2101
		1066.81	5775	0		439.973	5775	0			5775	0
		284.297	5825	0		453.811	5825	0			5825	0
		646.486	5875	0		295.622	5875	0			5875	0.2101
		525.676	5925	0		320.108	5925	0			5925	0.6303
		291.405	5975	0		682.46	5975	0			5975	0.2101
		432.838	6025	0		445.649	6025	0			6025	0.2101
		453.324	6075	0		328.946	6075	0			6075	0.2101
		414.243	6125	0		463.027	6125	0			6125	0.2101
		342.108	6175	0		293.541	6175	0			6175	0.2101
		530.405	6225	0		583.784	6225	0			6225	0
		447.054	6275	0		381.405	6275	0			6275	0
		566.351	6325	0		455.108	6325	0			6325	0
		223.649	6375	0		402.432	6375	0			6375	0.4202
		389.189	6425	0		241.892	6425	0			6425	0.2101
		456.216	6475	0		379.973	6475	0			6475	0
		489.108	6525	0		204.487	6525	0			6525	0
		210	6575	0		325.595	6575	0			6575	0
		297.541	6625	0		260	6625	0			6625	0
		379.568	6675	0		219.757	6675	0			6675	0
		255.649	6725	0		454.027	6725	0			6725	0.2101
		403.757	6775	0		319.216	6775	0			6775	0
		336.351	6825	0		318.892	6825	0			6825	0.2101
		166	6875	0		213.892	6875	0			6875	0
		448.054	6925	0		359.297	6925	0			6925	0.2101
		305.351	6975	0		174.513	6975	0			6975	0
		415.541	7025	0		334.595
		368.541	7075	0		440.973
		396.784	7125	0		452.486
		499.973	7175	0		504.054
		261.081	7225	0		398.514
		364.108	7275	0		297.865
		329.784	7325	0		414.865
		661.054	7375	0		427.811
		425.649	7425	0		390.919
		305.324	7475	0		292.378
		338.541	7525	0		607.324
		433	7575	0		485.432
		375.514	7625	0		584.405
		346.568	7675	0		509.973
		248.513	7725	0		480.649
		555.351	7775	0		730.568
		435.054	7825	0		794.054
		491.405	7875	0		732.622
		354.162	7925	0		800.73
		310.973	7975	0		770
		401.757	8025	0		489.216
		404.27	8075	0		391.973
		651.892	8125	0		92.027
		629.486	8175	0		186.865
		333.919	8225	0		458.405
		427.108	8275	0		395.459
		839.568	8325	0		355.351
		715.757	8375	0		557.378
		462.108	8425	0		643.081
		477.054	8475	0		417.027
		539.432	8525	0		788.892
		344.973	8575	0		680.568
		320.135	8625	0		507.892
		230.054	8675	0		542.162
		268.757	8725	0		857.297
		796.054	8775	0		730.892
		767.757	8825	0		586.622
		396.757	8875	0		550.811
		673.784	8925	0		284.649
		804.486	8975	0		479.324
		737.514	9025	0		984.351
		714.838	9075	0		939.081
		1011.24	9125	0		961.297
		788.189	9175	0		804.135
		860.216	9225	0		494.703
		831.27	9275	0		239.324
		512.243	9325	0		338.676
		835.486	9375	0		191.27
		792.243	9425	0		357.838
		941.595	9475	0		418.324
		893.649	9525	0		1075.11
		1399.35	9575	0		1074.68
		480.811	9625	0		874.568
		1300.08	9675	0		1132.84
		1138.43	9725	0		818.676
		733.081	9775	0		414.162
		815.973	9825	0		617.892
		940.162	9875	0		566.054
		882.297	9925	0		403.324
		283.568	9975	0		469.459
		446.838				347.541
		642.703				280.973
		609.27				283.027
		1015.57				414.216
		580.46				240.108
		967.649				661.081
		790.135				892.811
		844.054				944.919
		716.054				428.865
		455.703				1217.59
		996.162				1115.49
		716.514				636.649
		1064.08				1006.62
		600.46				690.324
		631.865				643.405
		577.027				629.378
		703.649				396.135
		921.162				5055.16
		1056.54				3977.65
		1113.22				4994.16
		666.216				3822.27
		904.189				2640.97
		1082.7				2079.76
		1053.92				1759.03
		643.622				3479.38
		899.757				1649.11
		692.54				1659.68
		536.46				1367.41
		652.432				1858.49
		610.135				1388.32
		1184.08				688.892
		1390.32				2533.49
		801.973				1640.11
		628.838				1488.92
		755.703				2881.16
		1097.68				3172.19
		682.892				1472.68
		1843.3				669.757
		930.108				824.892
		1408.43				1166.38
		677.919				1313.05
		570.865				1228.86
		704.865				791.46
		776				1228.54
		992.027				771.865
		1375.78				1087.65
		811.54				1411.65
		765.432				3826.57
		826.946				3350.05
		890.486				3434.84
		1241.62				2630.54
		1117.05				3786.46
		809.297				3036.22
		1245.54				2458.92
		1552.51				1753.38
		1026.68				849.27
		903.919				1693.22
		1619.49				1219.43
		1972.27				2028.32
		1514.51				1758.3
		793.081				2256.08
		800.649				1234.49
		653.027				1076.05
		814.486				2296.89
		1176.57				1732.24
		1088.92				2787.41
		1226.38				1886.68
		1287.73				858
		887.324				1485.27
		1520.05				1063.84
		1652.22				893.703
		1130.43				959.595
		883.676				1294.05
		684.216				1226.86
		1332.38				1000.76
		1564.38				1411.41
		1295.73				1541.97
		1534.7				1663.65
		1289.92				1353.81
		2014.84				1080.38
		1125.43				1200.97
		886.432				1966.59
		1013.14				1699.62
		990.973				1086.51
		907.73				685.351
		1327.16				468.919
		1164.14				533.622
		964.486				2998.24
		825.486				2248.84
		1024.14				1590.65
		1233.57				2714.03
		1401.19				1359.16
		635.243				2958.16
		649.757				3585.32
		1092.51				3459.05
		956.108				2369.73
		1262.54				2163.49
		1247.95				1795.59
		778.189				2022.38
		625.378				1803.51
		1157.22				1526.65
		747.649				2201.84
		734.649				2230.11
		1265.41				2073.03
		674.811				1926.32
		1269.62				1814.16
		1262.08				2786.24
		1009.24				2881.49
		827.189				2162.73
		585.189				2594.7
		972.973				2690.19
		511.568				2272.3
		881.108				495.919
		1943.32				1147.03
		1736.76				1299.03
		733.027				971.73
		783.27				1472.05
		783.892				1166.16
		561.514				1169.92
		873.973				973.973
		623.297
		696
		1202.65
		602.811
		967.595
		434.459
		907.703
		671.189
		439.73
		684.649
		780.432
		888.838
		919.27
		834.27
		955.676
		608.54
		865.784
		967.46
		759.27
		755
		638.595
		805.649
		697.595
		513.946
		532.324
		715
		696
		530.243
		464.514
		378.919
		1543.41
		638.595
		1321.35
		755.757
		846.378
		738.378
		668.027
		973.54
		520.676
		1018.81
		853.514
		1579.73
		690.73
		1424.68
		1627.65
		855.757
		764.351
		847.486
		926.919
		1008.19
		1850.3
		602.568
		891.216
		599.216
		780.081
		1208.05
		381.919
		1490.89
		877
		627.676
		1373.35
		1698.89
		1702.03
		1097.81
		1533.41
		1105.89
		1225.3
		1066.86
		1117.89
		1653.35
		1356.14
		790.919
		901.432
		1002.38
		1255.3
		1020.62
		1071
		1322.62
		1370.86
		1253.59
		1879.54
		1014.38
		776.432
		496.189
		657.622
		941.243
		1151.95
		973.676
		1087.46
		520.946
		1095.16
		1007.51
		705.973
		338.108
		533.676
		1006.14
		411.081
		835.324
		750.811
		834.784
		1596.3
		1850.35
		958.649
		1323.59
		1010.27
		717.027
		621.324
		906.46
		999.811
		807.703
		1466.54
		920.649
		1684.51
		1412.97
		856.297
		1163.22
		1058.78
		819.784
		834.405
		592.568
		3263.11
		3064.14
		1922.62
		1640.51
		2926.14
		2490.41
		3611.73
		2522.57
		1406.14
		2544.19
		1378.51
		1656.89
		1412.08
		1238.68
		1621.27
		1033.05
		1531.68
		1560.38
		1453.3
		556.351
		1395.51
		760.811
		1810.41
		425.054
		474.081
		981.216
		1508.78
		1821.59
		596.027
		1241.32
		793
		1526.3
		1100.24
		435.243
		968.297
		1074
		496.622
		327.243
		702.189
		1164.11
		958.73
		701.405
		953.649
		1063.32
		571.162
		726.865
		755.757
		1273.05
		221.351
		573.135
		745.189
		912.649
		861.135
		1062.97
		930.378
		362.703
		468.811
		549.784
		1200.27
		500.027
		672.973
		360.324
		437.73
		639.703
		613.865
		614.595
		451.459
		841.324
		476.243
		402.054
		282.054
		894.757
		1428.49
		861.162
		198.73
		764.595
		584.405
		1223.89
		607.73
		671.189
		310.568
		921.405
		657.297
		957.703
		691.568
		694.622
		693.081
		302.135
		268.054
		411.135
		569.784
		1115.19
		374.784
		235.108
		338.378
		319
		446.162
		585.216
		628.378
		436.405
		36.8919
		419.027
		589
		1327.86
		842.135
		1055.27
		319.757
		506.378
		881.865
		521.784
		251.378
		1023.35
		884.46
		951.46
		1312.46
		630.054
		513.865
		965.676
		984.378
		349.649
		806.351
		594.135
		1023.19
		1118.68
		1008.27
		1427.46
		559.216
		1060.65
		1083.46
		792.757
		869.027
		1095.08
		181.513
		1418.78
		572.27
		383.297
		597.946
		928.54
		1136.73
		1002.95
		361.216
		409.297
		1281.3
		537.973
		1024.78
		1077.05
		852
		1042.95
		1142.35
		1257.92
		1511.14
		764.432
		1394.16
		968.54
		1659.32
		995.703
		1055.43
		1025.32
		1285
		957.514
		1431.76
		961.324
		1041.59
		1201.54
		504.946
		1802.95
		1158.89
		304.216
		870.595
		852.568
		825.297
		914.081
		816.784
		848
		959.595
		559.757
		832.973
		1044.92
		918.054
		834.405
		845
		1958.92
		1487.03
		563.297
		855.243
		1608.43
		1364.08
		507.351
		1031.89
		1005.65
		1368.08
		1214.03
		836.514
		1405.08
		394.568
		628.162
		579.892
		1047.95
		1013.81
		1016
		826.838
		533.757
		769.162
		714.378
		773.297
		661.324
		565.378
		749.622
		1062.78
		563.405
		1076.32
		523.622
		827.405
		541.054
		1087.68
		846.135
		550.54
		916.27
		472.189
		901.865

## Sheet: Figure 4D
Figure 4D
(µm/s)
		4X-KO + KIF13B	4X-KO + KIF5B
		2.4675	1.0543
		2.1269	1.1714
		1.3681	1.164
		1.8516	0.9297
		1.5476	1.1066
		2.0311	0.9992
		1.6512	0.8677
		2.1859	0.7605
		1.3862	1.0664
		1.4306	0.8348
		1.486	1.2313
		1.4772	0.796
		1.8029	0.7027
		1.9964	0.3406
		2.1321	1.0222
		1.8455	0.9859
		1.5015	1.2018
		1.585	0.8118
		1.3957	1.0159
		1.6936	0.8351
		1.6823	1.0072
		1.9236	0.7579
		1.6231	0.8058
		1.8858	0.7872
		1.5338	0.9328
		1.7985	0.9346
		1.8897	0.6784
		1.5247	1.12
		1.4123
		1.4377

## Sheet: Figure 4G
Figure 4G
(µm/s)
		4X-KO + KIF13B	4X-KO + KIF5B	4X-KO + KIF13B/5B
		1.43542	1.98412	1.17542
		1.42181	1.05405	1.38511
		1.69843	1.35464	1.82673
		1.61965	1.37375	2.12695
		1.81567	1.00916	0.950854
		1.43608	1.51696	0.453097
		1.57696	0.907116	1.33264
		1.72292	0.697747	1.72163
		1.585	1.25511	1.89823
		1.70568	1.00642	1.0596
		1.85169	0.930626	0.718973
		1.67683	0.984125	1.03408
		1.46912	1.41308	1.35156
		1.76657	1.17956	1.21037
		1.17022	1.25272	1.4894
		1.41526	1.0658	1.55676
		1.42697	1.16845	0.801915
		1.41467	1.0769	0.986797
		1.39334	1.16755	1.42679
		1.57785	1.25518	1.35139
		1.67392	1.51602	1.01707
		1.5607	1.14517	1.5546
		1.59652	1.28274	1.63426
		1.34213	1.20971	1.28535
		1.71955	0.981269	1.87577
		1.55668	0.924783	1.91582
		1.58455	1.13007	1.46666
		1.53073	1.1778	1.70754
		1.59787	1.13695	1.65279
		1.53245	1.0974	1.78107
		1.33406	1.00346	1.21684
		1.53951	1.2371	1.91709
		1.54913	1.11517	1.34171
		1.59543	1.14066	1.74618
		1.61773	1.23183	1.72438
		1.55183	1.30309	1.50156
		1.72285	0.975969	1.51486
		1.47107	0.955601	1.52706
		1.17352	1.45507	1.82262
		1.60655	1.21349	1.45582
		1.57062	1.05922	1.58617
		1.59708	1.52511	1.54902
		1.67264	1.27563	1.35063
		1.45958	1.03155	1.17962
		1.55827	1.34247	1.24671
		1.48148	0.87718	1.43147
		1.60958	0.903981	1.18656
		1.17983	1.30215	1.47399
		1.69534	1.19752	1.79896
		1.48029	1.18174	1.44389
		1.63372	1.47042	0.47127
		1.55584	1.07418	1.93106
		1.44672	1.53939	0.817167
		1.7494	1.13987	1.40325
		1.51771	1.89357	1.34904
		1.44446	1.23838	1.30113
		1.42437	1.08191	1.7313
		1.31153	0.998145	1.42789
		1.41708	1.14703	1.27319
		1.6151	1.5043	1.59044
		1.45647	1.03503	1.22856
		1.51582	1.50795	1.32527
		1.40082	1.36867	1.27194
		1.49278	1.02567	1.32038
		1.53852	1.24282	1.25135
		1.53132	1.20373	1.29267
		1.44674	1.25785	1.89785
		1.72036	0.959494	1.57529
		1.40958	1.17441	0.960202
		1.50774	1.17129	0.944424
		1.54009	1.04445	0.648354
		1.45887	1.3077	1.64875
		1.69265	1.50272	0.901241
		1.5213	0.911216	1.60803
		1.54828	1.05282	1.25532
		1.45598	0.926429	0.650991
		1.51047	1.17002	1.46025
		1.62303	1.16875	1.41467
		1.59751	1.12779	1.39025
		1.53407		0.801653
		1.53763		1.65918
		1.62293		1.24671
				2.25678
				1.33892
				2.54108
				1.19292
				1.12567
				1.44409
				1.67058
