# Supplementary material for: Concerted action of kinesins KIF5B and KIF13B promotes efficient secretory vesicle transport to microtubule plus ends
Source: eLife. 2020 Nov 11;9:e61302. doi: 10.7554/eLife.61302 (PMC7710357; doi:10.7554/eLife.61302)
Supplement: Figure 5—figure supplement 1—source data 1. [file elife-61302-fig5-figsupp1-data1.xlsx]

## Sheet: Figure 5 - Figure supplement 1B
Figure 5 - Figure supplement 1B
		KIF13B/Rab6				KIF5B/Rab6				KIF5B/KIF13B				PAUF/Rab6
		Speed (mm/s)	Projected displacement (nm)	Angle (degrees)		Speed (mm/s)	Projected displacement (nm)	Angle (degrees)		Speed (mm/s)	Projected displacement (nm)	Angle (degrees)		Speed (mm/s)	Projected displacement (nm)	Angle (degrees)
		0.394788	-52.9802	117.715		0.254077	24.186	69.295		1.53404	-210.699	150.425		0.866066	-24.9437	176.202
		1.47257	-222.6	141.983		1.06023	-1.94128	91.474		2.12159	-275.986	177.097		0.379856	-12.6433	121.283
		1.9143	-322.328	151.357		3.67722	-146.28	149.81		0.521796	-199.58	154.108		0.679788	-1.22359	130.52
		0.928645	327.223	16.0045		1.46193	3.08868	89.6396		0.524258	-103.238	139.255		0.0528056	-3.2463	93.8173
		0.310683	42.0464	76.9026		5.37917	207.403	50.3392		1.5774	189.479	32.1767		0.201087	-5.57375	101.846
		0.181429	174.291	32.129		4.17477	-255.938	125.795		1.22067	446.242	29.5717		0.176437	-15.5359	134.035
		0.746268	228.791	12.7592		2.10677	153.618	10.4215		1.16822	-317.081	147.777		0.435808	28.0705	24.4376
		1.48527	139.995	22.4118		2.53729	198.233	5.53252		0.808145	-286.801	169.518		0.229563	-20.7356	130.291
		0.85708	126.044	38.9367		1.47365	94.613	19.5688		0.887306	-333.403	139.518		0.38375	-17.6653	167.402
		1.5221	186.676	24.6172		1.38399	4.95413	68.1731		0.0933383	-112.015	178.25		0.464075	-30.1398	121.408
		1.02774	167.375	18.7777		0.436072	281.1	11.8517		0.772643	242.639	14.0453		0.583654	-81.1741	155.687
		1.19165	212.436	14.3614		0.499895	229.279	17.6151		0.227613	361.411	32.1134		1.63238	-68.742	145.636
		1.56878	198.009	17.1305		0.547616	142.094	18.1359		2.13577	398.107	27.6801		0.768733	-42.0656	125.475
		2.15242	179.459	15.1987		1.19059	103.407	19.1513		0.920082	-319.387	171.153		1.09732	-25.3195	162.427
		0.543338	163.54	32.8712		0.429572	162.91	6.22591		0.48469	-333.871	152.962		0.885854	-49.2584	154.575
		1.26708	144.181	22.6308		2.24812	-12.1389	103.956		1.68786	5.73043	88.7739		0.59304	-61.6578	174.895
		1.36835	79.912	38.7795		1.30463	-279.88	127.417		5.44388	94.0293	67.9546		0.297495	-56.7032	157.002
		1.86955	354.591	17.8885		1.83094	234.025	20.0069		0.644154	87.5941	42.3395		0.899904	-60.4696	164.21
		2.49702	199.257	25.8246		1.00057	90.3281	58.7697		1.0085	397.529	3.54953		0.999908	-79.6082	158.308
		2.97544	-6.67404	93.8503		2.06243	-49.8911	119.901		0.644184	167.305	49.8756		1.10843	-35.4896	132.735
		0.315187	107.243	49.9523		0.887896	266.559	14.8047		2.54162	133.814	71.4317		0.323404	60.9894	1.17433
		0.287272	99.4072	55.0804		0.544643	11.1523	23.1104		1.70966	-314.13	174.909		1.32822	46.524	16.8014
		0.522302	83.1235	54.5223		0.297443	-211.743	169.57		2.02656	-15.0619	92.0357		1.05733	21.7089	28.2888
		0.540721	-52.5342	120.192		0.379065	149.775	6.09985		0.263913	-34.3689	173.61		2.35936	7.21586	41.9071
		0.367333	61.0124	62.3947		1.17687	147.218	11.9183		1.66442	-168.352	174.183		2.22652	0.995194	34.8174
		0.180219	38.7884	72.1885		0.731908	18.6231	48.1391		1.13976	-230.346	146.168		2.21016	4.4554	69.2449
		0.406971	65.2875	53.4099		0.347579	-15.1726	162.914		1.93222	-516.173	175.182		1.60161	46.5487	4.3804
		0.902597	79.5066	46.8645		1.00512	117.008	28.2277		2.89262	-43.4687	113.14		0.167634	20.2359	20.7948
		1.26362	62.1759	40.7514		1.10075	66.6219	6.23624		1.8666	168.317	33.0292		0.637121	64.9466	18.4187
		0.894386	46.5576	59.1954		1.48127	-267.033	144.685		1.97431	15.5764	52.9389		1.03119	21.5423	5.23367
		0.369396	48.1729	37.4106		2.60445	-154.971	176.098		0.944206	111.774	48.6834		0.846541	27.678	9.8488
		0.538747	50.1292	33.3958		1.22854	59.6462	44.6322		3.76486	-60.3577	155.118		0.282052	36.5134	44.9856
		0.42806	72.4947	5.02755		0.852346	114.489	29.883		0.218994	-87.8618	179.144		0.598761	50.8888	20.3467
		1.01734	61.8853	16.1188		0.65602	102.508	4.07996		3.97036	-25.1905	113.952		0.319419	45.9081	19.0814
		2.76295	20.26	42.6702		1.48736	144.567	14.2864		0.972741	-105.544	176.966		0.374536	-11.6264	178.882
		2.53246	90.9051	18.9552		0.985212	144.616	0.0293612		1.806	-37.0558	151.07		0.835644	-46.9757	153.618
		1.95933	38.813	46.7672		1.12835	147.235	10.8543		1.32123	-174.106	166.122		1.16951	-15.3591	133.981
		2.40511	49.3144	34.8664		1.41905	102.551	50.563		1.79629	-118.855	154.713		0.643109	22.1994	37.0714
		2.12372	18.968	65.3637		0.662469	16.9178	79.3441		2.73662	-7.62163	99.042		0.333838	9.06404	65.1041
		2.64751	35.3945	35.8412		1.36711	75.0015	16.5902		2.7167	-277.972	171.703		0.425424	41.5382	14.9522
		2.02461	154.15	14.5824		0.926635	104.884	11.9951		0.960862	-96.344	151.41		0.263187	22.1402	46.5977
		2.34417	135.251	28.8542		0.456002	95.3878	2.89009		1.30789	-115.255	147.252		0.352522	16.5078	55.4025
		1.86185	157.553	2.94841		0.980931	124.398	13.277		1.96682	-283.17	173.255		0.358343	45.342	24.5243
		1.66425	96.7091	22.0041		0.463833	118.102	0.986344		0.586228	-27.7133	126.787		0.0700686	31.8209	38.1812
		1.92313	36.2773	28.9905		1.35116	153.207	3.01769		0.753864	347.21	33.9085		0.945264	4.64378	69.6936
		2.71508	74.7298	27.7556		0.93786	120.652	11.7551		1.12336	-49.8287	98.2108		1.22156	6.86277	64.9077
		2.06813	44.6005	50.3357		1.16543	188.901	3.6774		5.30021	-337.829	165.844		2.3294	-27.7923	142.62
		2.11807	31.9335	71.7801		0.415145	110.148	13.0252		0.574663	207.797	10.9602		1.4979	-17.3241	132.852
		1.77459	-13.6055	153.546		0.53622	163.993	3.24248		1.9369	-350.178	169.574		1.42003	3.60701	5.00339
		1.60793	-10.5879	109.95		0.318253	122.212	16.4599		0.777899	-136.675	131.577		2.06439	10.3061	46.5821
		1.70049	-1.15842	93.2264		0.400131	108.148	22.3917		0.882602	-74.2209	128.401		1.18457	-12.4234	148.988
		1.14745	-20.8824	141.798		0.191043	48.0185	44.5736		1.96036	63.9915	62.7549		0.609113	-4.4508	98.0158
		1.45773	39.7568	28.38		2.10428	152.919	25.484		2.6381	-333.787	170.544		0.583979	-11.4235	131.384
		1.61234	112.428	14.0726		0.696016	150.852	30.2359		1.10465	289.995	29.7835		0.392513	-23.1806	170.293
		1.68563	63.711	31.7493		2.08772	268.589	24.0968		2.1858	-351.201	139.433		0.513282	0.0571498	89.6392
		1.68979	46.1511	35.5938		0.927289	-104.246	157.896		0.77612	-41.2646	99.7661		1.04218	12.4929	37.7062
		1.99099	112.877	7.67831		0.73735	-108.366	173.95		0.113725	-105.334	103.634		2.07074	-8.3872	115.387
		2.52033	137.561	12.978		1.0818	44.4545	65.3077		0.881273	-115.969	105.761		1.74726	-1.77564	95.1255
		1.29626	89.0731	37.9845		1.70991	-4.98412	103.832		0.111954	-237.644	147.748		0.56628	-14.2312	127.233
		0.483575	26.414	75.3107		1.14307	-143.804	169.55		0.127676	-379.522	161.011		1.78265	-34.3369	140.022
		2.84554	94.7884	5.44454		1.05435	-262.693	166.918		1.56404	-352.698	173.493		4.97996	-288.262	169.343
		2.76557	42.3274	26.5544		0.43121	-95.0157	132.541		1.59454	48.1295	68.3938		2.11645	-292.801	157.158
		2.19856	128.245	71.9479		1.54896	99.8875	20.5555		0.831082	411.872	36.013		0.762494	400.02	27.8907
		2.3024	-142.088	113.707		1.49206	106.11	5.47523		0.912372	408.333	14.0977		4.75215	17.2589	81.5505
		1.79265	90.0714	59.7715		0.628892	10.7806	75.4894		0.372056	448.748	27.39		2.33048	7.17545	88.5785
		1.63314	-53.1922	112.795		1.73527	43.5118	42.5645		0.688308	195.903	64.5445		0.135675	65.8764	6.68487
		1.30172	-241.015	162.962		2.13819	-56.676	135.005		1.24468	-293.042	145.878		1.29559	-36.5184	170.856
		0.769847	170.709	11.3593		1.16534	-305.858	171.006		2.25315	-150.42	170.083		0.697966	-70.8376	121.907
		0.749681	181.101	39.8096		0.20638	115.881	20.0879		0.772012	171.685	70.6715		0.642557	-202.646	167.343
		0.453085	19.739	61.2822		1.91988	103.904	59.2936		1.49888	435.734	11.287		0.712411	256.712	3.81504
		0.909543	41.9028	31.0554		1.27185	-135.6	124.727		1.14744	380.782	3.55978		1.35247	27.7288	64.9988
		0.414929	66.7498	0.0481877		1.38122	-151.62	161.605		1.22494	193.837	43.081		1.32799	-57.8251	173.648
		1.01326	120.213	60.8104		1.04682	-110.639	156.724		1.27241	460.647	20.1726		1.74055	-79.9099	123.177
		0.317958	276.037	5.56848		0.637307	-110.038	151.662		1.00777	140.243	53.8203		1.60623	-204.652	135.88
		0.454636	161.18	46.8511		1.00105	-160.503	166.29		1.17133	-201.716	176.345		1.89215	-106.161	165.038
		1.1106	72.1598	10.1918		1.26991	-102.532	164.458		2.25707	-146.615	106.64		0.761297	-206.278	145.816
		0.513557	41.8034	58.7852		0.833551	-139.202	146.486		0.992637	-411.788	178.89		3.60734	224.951	15.7079
		1.44289	26.0285	73.3438		1.21819	-45.1995	98.2471		5.90864	-45.545	99.5222		0.541749	-104.519	147.173
		1.78748	-69.2015	155.34		0.152133	102.957	0.790388		0.730501	387.062	12.1948		0.596554	-191.125	127.788
		1.64021	-147.651	175.874		0.784589	224.335	9.25846		1.07541	-215.741	150.339		0.722943	317.047	21.8914
		2.01316	3.75427	78.5525		0.376546	180.871	10.6068		1.52639	-253.788	158.845		1.10404	319.007	34.7661
		2.16354	10.1395	78.2762		0.534948	157.056	11.1246		2.77331	188.736	59.0926		0.71181	232.097	39.1797
		1.70954	7.3201	83.3885		1.09627	231.573	11.0638		0.656823	-68.5749	127.11		1.03788	75.1266	65.1484
		0.834655	128.183	17.5442		1.15972	236.42	9.34345		0.695307	-82.8455	99.9244		1.30064	270.813	28.0611
		0.56444	128.63	34.683		0.602161	-3.56205	102.015		0.445567	-142.706	106.925		2.49142	108.716	46.3746
		0.801441	100.689	18.3199		0.258547	51.9671	6.58256		1.36066	203.631	63.2633		1.69383	64.8871	62.5065
		1.95544	91.863	18.0528		0.654681	82.4707	11.9001		6.10207	-63.2017	114.257		0.773127	-23.1605	165.832
		1.6376	67.5024	22.5633		0.744493	104.17	6.05625		2.70912	172.906	18.4503		0.96915	-271.027	138.363
		2.19524	23.8857	47.1122		0.811268	-260.142	177.915		1.37748	-178.675	158.899		1.05284	5.33446	88.5439
		1.37305	-136.311	166.967		0.516748	144.729	57.5319		1.73107	-93.9298	114.895		1.61571	-16.1024	93.5276
		0.607175	-95.0557	144.779		1.03584	-398.238	173.073		1.24099	-87.2984	105.744		1.47427	-37.8254	154.566
		1.08517	-1.55904	91.3714		1.04815	-49.9166	126.988		0.6459	11.1544	70.4209		1.89134	-49.7777	141.702
		0.297931	53.0809	56.3034		1.52208	91.5836	52.664		0.349155	-30.0071	143.126		2.03923	1.6835	85.6117
		2.17085	86.6316	25.4907		1.03789	126.133	41.2078		0.826069	-24.5191	149.984		0.892998	-29.8267	162.73
		1.27188	42.7535	51.4143		0.568487	89.7059	18.5672		1.87384	79.8006	14.8837		1.16795	-29.538	155.913
		0.782784	51.4453	53.0824		0.838908	70.9732	39.0705		5.16328	-406.015	179.11		0.478323	-55.7434	146.922
		0.735051	42.1904	46.1032		0.302822	34.3748	66.6123		4.44868	-280.597	171.703		0.717146	-38.815	113.051
		0.658692	31.248	40.4207		1.41714	59.3368	16.5591		0.819746	433.071	12.6613		1.52206	-18.0133	161.197
		1.48733	2.08422	86.3447		1.27023	380.705	0.0438974		1.356	161.596	24.1797		2.06772	-33.1486	151.016
		1.77601	-64.0036	165.794		0.984984	241.141	11.0105		5.70256	363.934	11.0129		1.33067	10.153	68.6843
		1.77307	-103.62	144.311		0.582698	365.826	29.8307		2.66393	-66.2881	107.406		1.1162	-1.76958	93.2367
		1.72729	88.5925	54.9154		1.13726	28.0595	62.2244		0.28544	-372.964	141.728		1.88741	63.57	23.0911
		1.28291	78.4179	41.4624		1.78357	-61.5017	161.693		6.42944	-114.479	144.079		1.59945	61.4349	5.485
		0.570888	0.210801	89.2815		1.12371	-289.124	163.783		1.20005	-228.052	172.742		1.55981	49.8338	35.2531
		2.40383	-9.15839	107.648		0.407624	67.2021	27.7109		1.28009	187.987	42.2816		0.376411	14.0357	56.5405
		2.1496	52.0673	37.0161		0.784631	86.4465	5.59662		0.82914	-43.7174	97.0601		0.380243	-0.294212	90.3559
		2.13427	39.8142	44.8186		1.4829	-104.699	157.155		0.64261	174.591	63.1956		0.313697	-3.18403	94.0044
		1.57763	-39.5852	128.169		1.0771	-120.145	158.522		6.32959	121.371	56.4136		0.463132	-82.2568	155.289
		1.39235	-81.8867	157.54		1.91735	-151.379	147.927		2.19565	130.607	50.3242		1.32133	-35.6991	175.628
		1.51781	21.6805	77.2688		5.31211	42.9345	45.6682		0.938713	225.561	16.3803		0.487662	-85.5205	168.356
		1.95069	-34.3229	119.459		0.472495	-282.265	132.501		5.75554	245.969	39.6107		0.595196	-41.1208	169.754
		1.69014	32.0675	67.6777		1.3612	159.443	9.71769		1.44437	-154.228	123.739		0.480495	-21.3168	127.941
		0.96917	10.9093	78.4599		0.907841	145.089	13.6576		0.687688	259.906	1.56915		0.518484	-22.0691	163.851
		1.43843	9.14184	78.4674		1.71634	-13.1893	117.674		1.05885	453.415	1.36437		2.21076	-65.69	162.969
		0.519422	-50.0533	167.971		1.43558	-12.1441	178.179		1.29402	-326.824	149.608		1.26975	-23.5875	159.891
		1.76021	81.547	3.74984		1.02356	-192.979	149.22		0.386807	105.998	21.4599		1.93918	7.36728	74.1185
		2.3559	21.673	55.8777		0.608427	-173.39	164.56		3.09091	-64.8937	110.397		1.67121	-10.3698	109.987
		2.81805	-54.1689	143.264		1.76612	223.717	21.0046		1.74873	472.608	24.2464		0.376033	-31.0176	124.648
		2.10791	-122.198	165.908		2.13027	201.386	4.36813		0.444282	59.7362	70.4454		0.621198	-4.55887	95.4735
		2.49954	-56.8901	179.973		1.15434	68.5619	1.91355		0.77957	-274.825	168.271		1.02973	-7.26433	101.834
		2.96334	-57.6186	133.886		0.73241	62.4704	15.7629		0.644821	-229.253	174.484		2.06993	388.495	37.1827
		2.15483	98.6737	16.4612		1.33709	-28.874	139.264		1.20526	188.924	49.6095		2.57133	-33.6765	167.331
		0.251536	18.4467	53.6143		1.39329	-16.0302	177.142		3.49357	357.774	20.3392		2.21245	-164.814	178.622
		0.31146	13.465	12.767		0.763093	-18.571	104.371		0.612246	-126.955	124.854		2.33646	-421.142	179.239
		1.6848	-3.12709	104.055		1.07056	16.2656	83.991		0.199575	-282.116	142.654		1.25342	271.914	31.024
		1.00126	35.8702	51.0626		1.0752	195.004	17.8464		2.82828	417.182	13.2461		2.20752	242.054	9.36819
		0.963764	37.3804	51.4532		1.02579	216.738	5.88339		2.0084	-121.329	154.874		1.71078	52.6801	33.3509
		1.40599	-18.6853	113.631		0.34504	240.599	0.831944		0.939788	-321.331	141.206		1.46779	-17.1829	138.685
		2.06199	-52.1491	141.892		0.408208	346.227	16.7883		1.39443	-45.2026	98.7827		1.51596	-72.6704	144.778
		2.50768	-21.1881	108.795		0.0343601	28.582	47.0056		1.15673	95.5118	33.9776		0.870862	-334.671	175.579
		2.45519	-13.5357	108.472		0.970014	76.1712	19.4063		0.609982	192.344	13.3588		1.50058	-83.0622	137.391
		2.86154	16.7706	79.3287		0.126059	9.97136	57.1305		1.00367	361.425	33.9572		0.598511	-460.563	165.905
		1.56173	-2.57236	92.7496		1.91083	109.449	20.548		1.58808	287.796	10.9926		0.601098	-457.078	169.199
		2.0492	51.8775	62.7248		0.920295	-89.0481	142.768		2.50618	192.569	53.1478		0.542193	-344.833	178.423
		0.701187	20.9692	36.6818		0.224472	126.303	35.3331		0.676595	515.442	5.55542		2.64509	-70.5542	156.69
		1.74324	-4.32862	119.378		0.389862	77.5137	45.6682		0.366277	56.8881	73.4059		2.90165	-151.547	153.259
		1.2807	-53.5847	150.685		0.0085651	132.299	0.522237		0.194571	265.073	43.1788		1.97161	-1.76028	91.0626
		3.91076	-48.0117	141.403		0.517317	138.794	17.071		2.09328	427.334	19.7379		0.920536	-63.3238	112.064
		1.71783	-133.968	179.309		0.832507	162.977	6.83475		5.72617	149.518	47.2295		2.57364	75.9575	32.5892
		1.89101	-41.4987	164.58		1.11637	141.073	4.75226		0.317241	-81.8009	146.758		1.91261	44.2377	64.5555
		1.67038	-4.28266	91.4794		0.983746	126.522	11.0121		0.219077	-189.047	119.136		0.694391	107.555	41.6505
		2.30944	63.3127	52.1729		0.569102	36.374	40.9385		2.51041	241.617	44.5526		3.19191	52.9728	12.1358
		1.45622	31.9859	1.26666		0.47771	138.943	0.167199		2.94078	28.3645	27.0661		1.82743	-87.5338	121.026
		1.30848	0.0342348	88.4751		0.950364	131.737	14.0634		0.924027	-281.818	164.17		2.17946	98.7352	49.7061
		0.599948	26.8846	26.106		1.10884	103.599	24.6856		0.325221	-109.381	171.963		2.82551	324.767	17.2626
		0.404387	18.9984	50.0524		1.25865	127.293	2.71466		5.90393	483.168	19.869		2.34672	124.491	30.4096
		0.501627	44.6426	34.8053		1.29975	5.93183	72.1921		0.989144	-341.516	138.578		2.51108	2.03422	88.8022
		1.22189	50.5995	14.0705		1.03144	-49.5674	155.519		0.408507	378.31	25.8356		1.32136	-55.2791	106.351
		1.88775	43.5644	35.6769		1.07626	292.439	14.942		0.955488	-105.458	152.325		0.203248	-84.857	124.149
		1.53012	35.1998	39.5551		0.741532	207.677	29.0637		2.10023	71.795	76.249		0.512736	-25.401	97.8005
		0.915437	60.572	40.6612		0.339792	173.126	33.0036		4.12283	108.209	43.2103		2.33247	-36.6284	124.217
		0.571551	15.0101	71.2028		0.719089	177.988	31.0104		6.12306	345.423	46.8871		0.424364	-239.362	165.65
		0.575962	-10.0006	110.429		0.274598	182.962	40.7292		0.646399	-258.634	153.178		3.91852	-204.813	141.882
		1.02708	11.1896	74.7739		0.221486	184.048	7.46069		1.3517	-19.5629	97.1345		2.10558	341.559	11.2118
		0.356675	-0.50913	90.4597		1.62735	200.429	2.48088		0.792064	157.342	19.8479		0.829919	216.454	2.97401
		0.551074	57.6643	49.8376		1.48226	237.735	9.28607		0.428348	-281.865	165.937		0.595096	124.035	26.4732
		0.816923	103.366	28.9779		2.0111	96.8105	2.26974		6.14139	-336.565	144.894		0.585346	124.468	7.22021
		0.618747	49.3108	2.23763		1.11811	18.6553	43.3615		2.99302	-182.185	149.994		1.11957	48.5518	54.2179
		0.960102	8.06406	70.7254		0.240281	84.0952	25.0216		3.34627	-463.641	172.34		0.569333	-12.4797	95.7867
		1.51899	29.2022	75.1432		0.658865	271.117	2.53496		1.45894	326.204	11.9446		0.671732	61.2057	66.6273
		0.742521	-56.3248	105.49		0.732321	199.891	6.18874		2.20156	238.842	51.856		0.625705	-64.7996	176.105
		0.651233	-158.472	166.038		0.379778	168.501	30.7721		1.37295	216.481	4.69402		0.913207	-37.9836	139.051
		1.2783	22.5752	26.7596		0.466313	236.467	6.09106		0.710105	241.491	32.5041		1.47957	-88.7654	161.809
		0.902095	-40.6047	149.637		1.35461	198.923	6.88187		0.707226	14.8965	87.6924		1.26152	-65.0391	142.908
		0.657393	-37.8748	165.914		1.18826	276.457	9.30707		1.27819	-426.398	176.453		0.568237	-201.127	157.867
		0.578888	-42.4072	175.344		0.967346	238.789	0.735127		1.48966	-303.878	172.864		0.722314	-317.504	178.665
		1.36951	-22.3305	155.542		1.89039	223.413	2.56407		1.80415	94.462	61.133		0.108279	-385.309	161.291
		0.533231	-109.438	170.965		0.361523	230.431	10.1953		1.33849	188.725	14.8618		0.898728	113.5	36.4688
		1.01806	-17.8051	113.072		1.00864	295.208	3.71617		5.13857	325.381	4.81646		1.01383	55.7495	76.8271
		1.19604	-6.08826	93.8687		0.973406	241.824	4.07807		3.04784	315.66	50.2115		1.90643	8.97421	88.1226
		1.34423	-127.521	145.493		1.0696	163.523	10.0647		3.40384	-506.226	168.887		0.726325	-46.7939	98.1858
		1.05463	-78.9736	156.647		1.09545	211.14	6.4477		1.17173	378.702	21.6746		0.899652	-233.294	139.594
		1.17629	-63.4477	141.054		0.819105	275.936	0.638408		0.393335	-195.858	118.146		1.37438	78.7536	28.4911
		1.30872	477.661	11.2079		2.0734	280.302	2.43826		0.863894	-183.924	130.38		1.84179	97.909	1.57041
		1.61853	220.89	61.7538		0.361666	276.404	7.1753		0.163133	-211.17	175.222		1.90555	79.4344	8.5137
		0.615663	-92.3471	125.953		1.17019	262.457	8.74501		0.580048	-297.517	157.74		4.93583	55.385	18.8737
		0.575504	-308.508	179.758		0.848778	271.823	3.7804		1.21892	177.131	69.3677		1.34904	-198.179	138.561
		0.0964215	-249.606	159.55		4.87917	-193.27	140.535		3.18529	150.588	1.52021		1.80492	22.4484	67.4719
		0.207121	-178.884	133.074		4.35449	-119.484	149.221		1.97004	-227.371	161.662		3.27348	-216.761	179.003
		0.2183	-119.294	106.157		1.64486	71.024	38.2367		1.87413	206.206	5.69893		2.43426	-2.75046	90.3606
		0.86632	-436.795	167.711		1.01913	42.6581	21.2566		0.788217	286.707	1.6826		2.50454	207.345	21.4288
		0.491631	-336.997	150.464		1.71775	8.1319	73.1501		2.84891	168.605	40.445		2.40968	-68.1962	142.793
		2.49609	41.0191	83.8711		0.963192	-32.8795	137.592		0.65956	333.575	9.83672		1.55224	-4.16958	93.6602
		2.65584	-57.7707	106.83		0.871315	39.8753	23.1978		1.5216	108.257	29.0019		2.71531	-39.187	140.847
		2.01974	104.193	45.1209		1.2304	115.326	10.4166		0.289544	-137.409	137.279		3.09659	-131.285	167.828
		2.49007	77.3297	15.3469		1.4825	130.978	12.202		1.56745	-72.9202	110.465		2.47104	-170.092	118.842
		2.63435	28.3093	45.8578		2.00117	122.453	48.4873		1.16517	-14.3339	109.246		3.41569	-51.0375	115.959
		2.87107	-81.2727	163.86		1.26709	75.985	37.3438		0.272779	-124.321	174.844		4.34128	-52.4657	116.135
		2.84991	-62.0633	121.545		2.33043	173.956	42.6961		0.55395	396.306	9.71277		3.48954	34.657	53.8216
		2.56059	22.3056	52.0764		1.12885	64.9606	4.60571		0.366451	274.113	44.2228		1.26022	162.93	18.9189
		2.91366	21.7346	42.4527		1.43253	27.3548	78.2285		0.224698	-24.6123	135.69		1.92503	-1.28349	91.8221
		2.44501	-70.6793	146.337		2.77733	352.885	7.01207		2.99122	-137.504	160.914		1.34662	-85.0969	147.593
		2.52445	8.78145	77.9431		3.86115	297.06	23.8433		2.94149	278.373	17.6039		1.38868	-178.15	164.316
		2.09864	76.5891	12.9647		0.980662	-249.233	128.394		1.92165	-217.685	149.741		2.40014	-41.6156	128.99
		1.77197	-34.9861	113.915		1.84843	-373.658	160.402		0.300287	108.526	18.6593		2.37805	-110.137	168.614
		2.69983	-97.2275	151.126		1.2543	-203.252	153.828		0.292189	91.3308	36.8352		2.10117	-20.0178	167.649
		1.94497	-48.6965	132.232		1.26792	-131.813	177.453		1.21689	-71.6223	179.434		0.234105	-69.8324	173.317
		0.588695	361.896	26.6592		1.22747	-40.7154	128.804		1.33961	163.492	9.80426		1.17055	-59.1677	178.67
		0.552535	49.3942	36.9211		1.60948	-135.186	139.649		0.278545	-2.59753	91.548		2.39562	-28.7317	141.496
		2.30852	-92.4457	168.279		1.79117	-43.7244	176.053		3.07922	308.832	19.0331		1.35323	-53.4188	160.122
		1.64714	55.483	16.7783		0.60707	119.034	62.0437		0.698688	45.9549	74.5432		1.45831	-68.6511	169.725
		2.40004	156.733	20.0998		1.49003	292.956	24.92		1.29055	-95.2464	134.468		0.78571	-108.257	161.737
		2.59485	220.84	8.58716		1.032	104.154	50.8066		0.776011	-328.968	169.069		0.280354	-113.261	174.253
		2.60756	99.0495	6.9386		1.32444	110.977	46.5725		0.266758	-166.883	155.013		1.69528	-120.355	168.913
		1.05604	17.7454	70.3291		1.20314	57.3227	34.5413		1.297	-55.3443	111.788		1.33174	-179.768	148.084
		1.41654	17.9827	81.2144		0.746428	-14.4212	114.728		0.64148	-253.136	158.159		0.817048	-83.254	164.515
		2.23728	-39.1466	115.921		0.461476	-13.7591	103.177		3.34516	-144.062	145.498		1.87072	-68.8791	169.469
		1.68385	56.0386	20.1762		1.1246	144.739	42.7245		1.38279	-41.6542	105.181		0.155177	-67.2767	159.946
		3.29591	466.542	2.01257		0.924803	99.9369	26.1908		5.89105	-400.544	170.811		0.954413	-91.5766	151.827
		1.08148	205.28	1.80075		0.950195	271.758	30.256		3.02343	-0.174768	90.0238		0.715331	-73.3897	151.841
		2.37276	345.865	14.4963		1.21896	151.075	0.314829		1.08251	405.538	9.08931		1.22888	-73.6752	178.382
		0.501686	141.463	56.3905		0.140396	158.368	43.9492		0.767764	191.626	44.4994		2.23199	-65.5492	163.574
		1.48241	162.781	39.6944		0.951157	123.255	43.1013		0.78151	180.703	37.7123		1.26093	1.21439	88.6147
		1.36289	-294.997	169.246		0.943167	173.334	0.852445		0.506951	25.536	79.8126		1.40968	-114.718	176.229
		1.64291	322.18	22.7783		0.760754	196.777	3.8187		0.417011	302.064	44.1035		0.632414	-121.459	156.535
		1.1224	-272.98	132.799		1.12726	138.077	5.49011		0.182153	417.478	8.5588		0.741508	-99.2563	168.502
		0.727298	-317.923	165.458		1.41369	54.1599	25.444		3.24024	25.6808	57.8464		0.779075	-76.996	179.215
		1.73763	68.7442	44.9558		1.36769	238.708	7.562		0.606746	-176.534	179.837		0.808015	-65.6859	179.03
		0.606768	-80.155	120.386		1.08975	152.512	15.8454		1.02361	152.27	40.2094		1.41624	486.961	5.95694
		0.834664	-94.9067	169.535		0.932865	75.5484	42.3892		1.41367	105.646	33.1537		4.882	465.401	6.69669
		1.31516	110.229	27.7722		1.21019	106.942	45.8936		1.05661	125.556	66.1093		1.27604	208.36	7.86702
		1.80936	298.589	13.5311		0.894537	23.1623	9.04028		0.822901	260.421	50.8717		2.45578	-453.462	163.163
		2.46209	-166.579	151.441		1.02219	208.856	25.6278		0.152966	482.844	1.03348		2.33902	225.047	19.9164
		0.888439	-281.17	169.804		2.06334	237.409	33.8323		0.346477	67.0834	48.1384		1.04049	160.263	27.4682
		1.35002	-207.511	143.707		0.71657	43.5694	33.1882		0.542663	-289.217	162.05		1.1206	-132.593	114.002
		0.309931	-109.66	115.649		1.4728	57.2509	3.87038		0.872843	-468.054	166.349		1.00222	-106.774	107.643
		0.896564	165.948	37.2232		1.64826	74.1986	23.8249		1.42747	-273.074	171.983		1.26818	-271.799	129.545
		0.765823	131.374	36.984		1.50589	41.1651	61.5797		0.605248	51.2589	28.1405		1.74352	164.734	7.48616
		0.293802	132.412	42.4951		1.01298	125.209	13.414		1.35791	82.7725	5.56843		1.33139	285.043	22.502
		0.944558	107.8	31.3658		0.603506	131.123	17.1454		0.344723	78.379	9.34638		1.06842	431.754	5.96626
		1.69847	42.1451	60.3845		0.764675	-3.88539	145.304		1.08965	317.195	5.20353		0.421697	194.668	11.2463
		1.32186	67.4725	42.9537		0.689802	104.769	17.7684		2.06119	61.4514	70.8253		1.16538	276.107	6.48881
		0.46795	80.4501	34.4481		0.961204	74.0339	37.9452		3.0676	-314.679	155.571		2.07971	233.433	10.3026
		1.07932	124.134	18.0598		1.34197	328.547	22.7438		1.35744	141.554	26.4741		1.28865	206.05	26.6185
		1.54513	209.14	5.15016		0.568749	208.003	25.0105		0.7391	118.81	38.2228		1.54632	81.4618	52.6063
		0.507662	179.655	30.6853		1.71852	233.144	9.46736		0.540481	-281.978	159.856		1.0281	45.3563	63.5669
		0.368298	107.736	5.54128		0.951985	192.74	62.7106		2.83275	-231.951	170.461		1.54759	51.3063	69.9072
		0.367769	59.6391	50.7547		1.8714	339.82	13.2607		0.306035	441.178	19.6824		1.23838	17.8194	79.9616
		0.334459	56.206	40.5636		0.614016	190.143	10.0286		1.19814	173.734	55.9132		0.545307	-162.447	144.361
		0.330227	97.3292	38.6835		0.141313	172.092	4.00502		1.38648	-444.279	176.413		1.56183	-20.7352	94.727
		1.56821	101.621	20.392		1.04924	163.127	18.7421		0.372118	119.853	29.2965		1.68088	-200.751	161.985
		1.00326	269.041	40.2435		1.00422	227.945	5.53672		3.74071	302.173	17.515		1.11661	-149.551	171.16
		0.68735	145.805	55.244		0.412009	194.128	9.4458		1.07008	-155.422	170.52		1.71155	-49.529	132.36
		0.777369	210.201	40.0807		0.155178	163.274	21.2818		0.883899	305.736	44.3758		1.81654	78.3996	3.67922
		0.975166	-57.6262	106.622		0.418134	107.275	52.739		1.4148	-59.5698	100.758		1.37195	49.4504	64.7609
		1.85957	-80.2358	115.038		1.94052	168.138	5.90155		0.221405	-70.3688	150.389		0.679326	-200.658	168.717
		2.16523	-28.4819	132.17		1.84299	27.4827	53.8441		0.0762687	-56.4538	122.957		2.882	51.5046	61.3288
		0.95033	-66.0821	151.753		2.45077	16.294	74.3789		1.49838	-127.35	144.685		1.71571	-206.444	139.395
		0.874363	-38.0442	132.779		0.965828	47.7718	49.42		0.399453	297.908	23.9478		2.07067	-190.341	173.567
		2.09392	21.4192	47.8276		0.922785	46.2898	32.9251		2.53038	295.552	52.36		1.65804	-376.243	150.523
		1.61704	-28.7749	135.811		1.16579	45.447	17.4216		2.7087	-264.094	162.671		1.14855	-203.452	163.708
		1.62479	4.54227	74.7358		0.556374	25.2175	59.477		0.932727	-110.125	128.253		0.938917	-420.879	145.345
		0.758345	-57.2051	160.747		0.917294	32.8957	31.3171		0.883819	-11.0569	95.4949		1.08703	-155.713	126.246
		1.25999	4.28924	70.3597		1.59628	32.8363	1.39836		0.571135	-17.9674	95.7064		2.30763	48.6652	19.1214
		1.45588	-8.41573	149.78		2.72318	21.8857	80.5626		0.875614	42.6311	55.96		1.98884	-19.0545	136.666
		2.14462	-21.6916	120.565		0.977513	-147.256	142.97		0.263651	273.83	6.736		1.24984	317.425	13.6739
		2.56958	18.0793	51.2801		1.80458	-10.5325	114.233		1.63408	55.8736	34.353		0.44803	-125.07	172.213
		2.30488	-32.9548	139.615		0.440375	-288.916	150.267		1.42521	252.984	10.5449		1.3073	-68.479	109.966
		2.16118	-33.9247	174.091		0.522068	-116.548	170.728		2.0307	-252.698	177.586		2.91628	-76.2463	152.644
		1.60217	-14.127	142.349		1.39409	-155.479	162.566		1.42395	52.1403	60.5621		1.11082	249.566	46.4203
		1.96136	14.7961	7.82872		2.10786	-208.397	140.96		0.495628	74.766	76.5759		0.64459	182.005	39.7966
		1.80896	5.6204	37.5974		0.542132	97.8006	36.3346		1.60035	47.6346	82.2123		1.24512	28.8507	80.3137
		1.94329	-1.49373	93.6643		0.743288	102.505	32.5878		1.45438	392.171	17.6728		1.38488	-99.9679	120.378
		1.93553	-28.3966	179.681		0.88589	233.674	6.84903		0.228174	-368.811	159.749		0.991856	-268.741	129.755
		0.79367	-66.6117	154.343		0.318476	163.746	2.7508		1.81168	-454.7	155.605		0.817867	56.2169	57.1524
		1.61431	14.6961	42.6832		0.511903	171.771	38.0159		2.09867	-201.764	178.316		1.03668	-94.9787	115.273
		1.82243	-17.1325	122.035		1.62209	155.616	1.74474		2.63666	29.2131	57.9242		1.01392	-132.827	141.484
		2.2165	-5.1792	106.805		1.8118	165.878	26.5121		1.29618	414.253	3.67319		1.32012	-206.265	156.299
		1.92482	-30.8548	144.685		2.45936	132.043	38.2234		1.02353	30.8664	59.551		1.5222	251.301	10.7331
		2.85292	2.14525	84.6772		0.944727	-13.3305	111.52		1.15226	-299.555	152.834		5.3689	33.3326	82.3482
		2.75003	5.05225	40.4152		0.948018	-132.703	167.183		1.99138	65.1483	2.13155		1.78904	-10.1203	102.874
		1.92038	4.87542	32.2301		1.16628	-100.74	155.356		0.621704	-17.0088	102.272		1.62274	-211.811	125.907
		1.67834	-18.793	152.33		1.20158	-380.714	174.311		1.11092	-224.524	167.285		0.800945	8.65537	88.0687
		1.63163	-12.3688	175.149		0.438553	-156.753	153.061		1.05389	-115.046	131.672		1.57391	-23.7508	95.3915
		2.04197	-5.64841	124.719		1.10636	202.513	27.2976		3.83589	331.137	17.0089		1.54772	201.543	15.3412
		1.90328	-15.8802	143.82		1.27205	261.98	3.7363		0.884488	-218.528	176.123		0.746238	77.4885	8.40828
		1.48164	-14.2839	130.523		0.902309	298.693	5.19316		1.46837	-321.145	137.292		0.568543	26.6232	47.2738
		0.915529	-17.4822	154.57		2.09384	42.0397	62.4621		0.793996	52.8023	71.2782		0.809698	-26.9943	102.178
		0.783184	-10.0422	148.023		1.37434	-63.559	102.091		1.72	-79.558	158.369		1.11655	-176.151	147.456
		0.41966	-4.94817	104.827		2.44391	77.2145	33.1383		1.54356	-273.26	158.816		2.27764	-183.888	173.839
		0.574036	1.17046	77.8798		0.691545	21.7377	81.3062		3.00421	-323.647	151.01		1.26976	-55.023	152.114
		0.966728	-0.378937	94.2428		4.00277	23.1985	73.7451		0.755162	208.986	43.9035		1.32761	-67.3388	133.334
		0.938468	9.06897	61.4023		1.05756	73.7541	4.21139		1.08072	-147.461	111.703		0.757246	-69.1687	142.5
		1.28845	8.39408	64.5431		1.42974	-84.9649	157.451		0.486337	-451.368	179.404		0.713626	-28.0014	151.459
		2.19558	45.114	20.2158		1.03149	210.961	9.55559		3.64602	-460.72	160.464		1.395	-21.5633	118.689
		2.44971	54.3135	2.02044		0.243797	261.653	34.4814		0.819811	89.7894	56.3063		1.64586	14.3892	84.0413
		1.67157	26.6431	3.64972		0.806921	169.479	46.8044		3.45475	119.358	5.18833		1.13581	5.79165	82.5248
		1.56149	8.09463	38.9978		0.192412	14.7967	86.0783		3.14226	253.129	51.9019		1.31451	-55.3037	118.744
		1.88592	22.7247	21.2234		5.68171	-52.9341	103.309		1.25443	459.842	26.2764		1.64957	-53.1824	144.548
		1.65041	4.96878	64.3477		0.410377	184.553	36.7724		0.763413	-149.957	137.802		1.14829	247.169	4.66465
		1.41538	1.27014	82.1584		0.59709	201.644	46.1158		4.15384	-265.683	178.942		1.89008	321.994	13.8644
		0.703984	-27.3005	177.926		0.768864	193.909	20.2481		0.661902	-30.477	106.392		1.01009	112.205	15.5442
		2.64655	51.9674	16.3769		0.901984	279.708	51.0884		1.71874	73.5295	0.960223		1.59279	31.3772	46.1737
		1.81306	10.7868	60.5841		4.53252	369.954	38.6047		1.13816	232.962	45.3337		2.38711	154.691	5.17674
		1.75312	26.0212	7.77776		2.1164	-245.007	179.364		0.459895	339.754	5.94904		1.40853	27.4171	19.0042
		1.60044	24.7105	33.4799		2.87905	-31.4187	145.434		1.68233	170.785	3.36142		1.66701	267.999	27.3969
		1.19245	17.491	20.4025		1.17845	-134.797	178.583		1.27204	-125.647	143.413		1.23419	144.273	47.9916
		1.12408	29.7199	15.9862		2.49993	181.23	9.11509		0.541005	390.995	19.9043		1.79983	-186.388	119.399
		0.518696	23.8452	16.0859		1.07413	-38.579	107.81		1.50593	114.782	71.0829		1.74825	-133.845	114.028
		0.700184	29.6745	20.5704		1.04349	76.5082	49.7236		0.533505	496.883	8.86348		1.30459	205.781	4.60535
		3.86707	140.745	11.0507		0.645041	-70.3876	138.555		0.21751	95.3628	18.4488		0.495098	107.228	11.1654
		2.93303	29.6729	46.2974		0.0526528	-57.6913	109.146		0.0895428	65.6234	24.1439		1.87377	142.936	14.6081
		2.38063	-24.5542	117.327		0.851177	-16.6153	101.826		0.373299	216.522	4.75415		2.83405	30.7276	57.4661
		2.19816	-97.2544	179.221		0.774197	57.2245	34.9242		5.22673	342.553	11.6308		2.63661	-202.448	148.854
		1.59323	42.5205	33.9841		0.982644	101.563	2.41201		2.46335	110.685	52.2808		0.975594	-115.213	121.658
		0.515641	375.115	36.1399		1.48535	2.70065	86.2244		1.14558	5.52271	87.2533		0.690213	365.484	4.12278
		0.731244	-145.856	106.923		1.1054	-21.0169	105.191		1.39174	130.506	4.58741		3.27201	-9.06489	112.338
		1.84403	237.783	58.24		1.10478	-37.8613	94.6041		1.30226	372.004	38.9633		3.02825	270.281	26.7931
		0.760717	145.532	68.8365		1.56795	-192.86	148.318		0.393101	-173.695	128.295		0.329817	-203.519	158.498
		0.930873	-272.84	137.387		2.33089	-347.38	170.927		0.681168	174.893	64.1962		0.306901	-111.769	167.718
		2.42013	338.84	18.3664		1.0096	-19.2626	110.425		1.38241	-453.598	178.842		0.176959	8.94779	81.9163
		1.21506	105.103	57.4709		1.14692	79.8396	51.9944		0.639988	-1.82168	91.4141		0.506395	-21.5605	99.7511
		1.44494	-62.0901	109.24		0.908355	54.1302	44.3644		0.556701	173.018	54.9353		1.76759	-36.3394	123.255
		2.29927	-205.695	138.047		1.02605	96.5587	43.1719		1.45787	-279.821	148.194		2.5785	2.48415	87.3973
		0.519974	-471.845	158.165		0.932365	97.3806	28.3362		0.948425	-311.08	128.862		2.84556	88.6922	11.0587
		2.07145	374.502	31.0312		0.180126	104.984	29.6232		5.27052	-207.497	114.41		1.37495	-43.7293	133.16
		1.76196	286.972	11.5899		1.97538	157.506	57.0339		1.10216	-135.46	105.545		1.19973	114.233	72.4528
		2.40304	116.386	34.6648		1.62115	245.189	6.63242		3.04867	-433.742	172.838		0.792186	87.8305	42.0427
		2.86988	-25.7152	104.623		1.61525	-36.2411	157.918		0.82604	-115.917	146.107		0.777954	32.479	68.4707
		3.25072	60.8235	44.841		1.31255	-85.0276	147.647		6.33911	-98.0079	107.988		0.836133	25.668	74.684
		2.30615	78.1011	29.675		1.02627	22.4618	70.4504		1.11809	460.579	13.0775		1.0227	-82.271	159.211
		2.44122	131.661	6.18269		0.778128	179.068	38.6161		1.03609	205.499	31.7984		2.04086	113.758	43.7351
		1.38874	81.5179	20.1706		0.398501	-120.52	170.204		1.1832	191.219	45.9357		1.61014	-147.89	157.2
		0.749697	71.4479	35.1073		1.75197	105.411	11.7543		4.99045	142.607	49.6646		1.75934	162.642	62.3824
		0.763747	53.8979	34.1287		1.5328	93.4049	31.675		1.46581	-321.782	134.67		0.547669	-51.7929	107.599
		0.525222	4.25161	31.1114		0.662141	-17.9075	98.5136		0.611582	-328.555	142.071		1.21598	54.7355	56.0516
		0.136144	8.99016	62.0057		0.988639	46.1331	74.1924		2.00354	-416.423	151.512		1.06802	64.7409	68.814
		1.72275	384.45	31.7962		1.88219	-32.9577	97.5978		1.62124	64.7796	79.2047		1.06437	-73.4644	131.291
		0.49238	154.648	69.3999		0.888779	152.265	40.6635		3.82893	-215.501	148.131		1.52258	134.116	3.59403
		0.875652	-43.871	147.294		1.09436	151.585	40.3442		3.32376	442.582	22.3996		1.88807	-258.391	179.051
		1.81034	194.609	23.7423		0.84988	54.427	46.877		1.0569	155.421	13.0416		1.96525	229.179	3.01724
		1.5942	158.796	27.2814		0.379893	75.8104	10.2414		0.395955	46.1662	34.5927		2.02799	6.5645	86.4108
		2.30212	318.608	13.5788		0.442372	-50.4744	106.33		1.24688	-424.999	174.825		2.57215	-134.806	153.416
		1.47892	168.224	17.4319		1.12402	45.8783	23.6136		1.41412	340.1	41.7991		2.20393	-289.057	146.543
		3.96418	173.784	14.1294		1.5766	60.8017	60.0993		0.671405	-33.6067	117.954		2.78531	309.98	25.4502
		1.01736	78.3062	14.4128		2.20322	-71.1673	176.191		0.494565	164.269	30.7996		2.09748	-46.7657	103.583
		0.467225	104.102	3.72336		1.46146	3.40292	85.2437		0.142494	72.2703	10.228		1.30733	-442.557	164.99
		0.212424	100.594	28.0418		0.828783	-2.55412	107.746		0.894842	448.814	8.10608		2.76935	-83.9498	113.956
		0.14322	78.1915	25.9382		1.0299	93.297	79.3269		0.691089	314.594	27.0235		1.5707	14.8652	54.2456
		0.174699	75.0626	15.811		4.93385	103.031	75.9661		0.609693	139.822	31.7526		4.13428	118.823	18.2806
		0.333611	120.52	10.8738		1.09162	453.555	3.29008		0.596826	-15.3876	100.569		0.14122	331.436	18.6003
		0.815058	91.0286	37.4034		0.251179	240.345	30.278		0.419081	-81.0143	176.876		2.15559	-42.3363	107.9
		0.379217	126.357	22.9196		3.61897	326.291	47.7324		0.511921	78.2684	79.6316		1.51041	202.247	0.778376
		0.407711	111.51	34.607		1.28629	-313.108	150.379		0.490647	-228.4	125.921		1.90422	-287.849	128.764
		1.59082	111.296	5.77242		0.443963	183.515	28.2428		0.576129	-278.213	153.637		2.66376	-122.022	179.146
		2.10875	82.8665	40.8568		0.898835	82.1677	58.9765		0.887374	-396.65	168.264		1.15754	-227.938	174.061
		0.557149	81.5922	25.5761		0.575726	50.2872	31.4032		0.37211	-89.5298	172.212		5.3578	-166.034	157.482
		0.805661	43.5743	52.7649		0.494661	-62.1329	132.351		0.589686	-285.77	175.702		1.9231	165.5	43.3113
		0.291017	-17.6543	99.6695		0.68229	-30.2789	97.0731		0.817133	-497.109	172.388		1.24721	158.896	31.1146
		0.727425	85.531	51.7509		1.15675	-198.071	156.501		1.84	-197.318	171.694		0.21167	169.323	60.9215
		1.15386	69.4096	57.7619		0.351376	-182.968	162.248		2.0964	15.8937	55.7737		1.30049	138.207	55.1134
		1.81439	337.228	28.3065		0.469798	-320.977	144.906		1.1633	450.948	23.9052		2.05476	156.675	70.5192
		1.9662	224.356	23.725		1.11909	-247.661	158.357		0.996819	218.197	19.8983		2.06674	-41.4087	98.7558
		1.15643	67.673	46.2433		4.63061	-235.93	155.936		2.26847	95.6612	23.739		1.44392	167.938	50.3987
		1.32222	21.3714	79.0857		4.54382	215.365	38.0067		0.785022	-125.724	154.678		1.48323	54.6986	43.2172
		1.20928	-100.239	124.167		2.24832	-436.84	169.539		0.491569	-28.0546	164.956		1.1452	-61.9613	118.787
		0.515136	-142.459	153.361		1.08599	-229.614	150.926		2.85277	-422.21	174.733		1.40371	-22.0627	179.771
		0.648426	5.74302	87.2485		0.625375	160.168	30.0452		0.409503	-263.042	156.794		2.41126	-4.63705	95.8347
		0.624394	-73.9483	114.326		1.61116	-36.083	172.593		1.12785	-276.181	169.156		1.6801	-80.1412	151.097
		1.41875	-22.6551	132.068		0.844097	-235.128	156.655		1.09392	-126.637	133.049		1.32003	-81.9171	141.192
		1.36261	219.784	5.12665		0.773533	237.42	43.1554		1.95661	-310.01	147.728		1.00205	-25.6148	143.288
		0.488534	82.6786	13.0684		0.21607	80.0295	71.2168		0.649909	-226.934	174.583		1.75338	14.0027	54.418
		1.37758	174.95	45.1264		0.862259	143.231	46.4743		0.727176	-122.802	161.84		1.51027	88.8477	56.2786
		1.72141	-2.19178	90.7181		0.684121	2.64172	89.1205		1.24993	20.5137	74.6575		1.24268	69.2349	62.5859
		2.03245	-168.416	139.429		1.70441	-32.6037	160.551		1.00982	-135.471	176.969		1.10438	66.5854	58.9859
		1.67136	270.558	12.9855		2.40363	173.251	18.3844		0.383883	-149.237	125.882		1.42356	54.8091	69.139
		2.37769	186.469	0.991034		1.50639	6.49202	76.2909		2.14034	-131.913	163.027		1.19016	-32.4803	105.335
		1.96065	16.7666	76.7727		0.13896	150.428	48.4048		1.51315	158.079	37.8234		2.98828	-154.829	131.195
		1.26336	48.1667	15.4038		1.09062	154.398	5.45786		1.27994	-137.944	162.696		0.202523	-69.4913	127.502
		1.08639	114.652	3.21053		1.09633	-4.77307	92.5685		1.61775	-180.145	137.845		1.76393	281.602	22.5285
		1.17497	163.344	22.5541		1.44041	275.056	37.7669		2.06158	-356.379	171.812		1.43373	-92.6794	143.644
		0.979813	173.947	4.19726		1.02215	-102.545	121.926		1.00772	29.0383	58.5984		2.8491	514.91	0.977804
		1.35147	246.609	4.11469		0.497064	-20.7944	103.354		0.722026	-283.076	132.718		0.585467	361.02	17.8676
		1.25492	125.421	6.54954		0.946726	-96.8944	162.734		0.699072	-375.162	159.974		1.0841	-59.6711	109.03
		1.04819	117.668	1.82218		0.88568	70.7966	17.9263		0.617525	-263.195	133.191		0.99629	-264.396	141.813
		0.111066	138.017	19.4918		1.21993	34.2507	6.90899		2.19005	-30.4416	100.633		0.214485	-68.7569	111.127
		0.838183	-112.023	154.729		1.32791	68.1829	6.36694		1.20398	163.371	60.7026		0.320005	-148.77	155.757
		1.81273	-6.08218	94.8228		1.28458	10.7716	59.8018		1.41722	56.6505	79.8224		0.414968	-0.251029	90.1271
		2.37481	-53.4326	132.664		1.85458	119.346	10.3786		1.25611	-111.381	108.968		0.56127	-50.3579	140.398
		2.6324	343.751	3.1828		0.925774	386.102	15.0435		1.55629	-163.81	171.585		0.215931	10.4145	64.8102
		2.06617	107.282	7.263		1.62291	122.554	55.5085		0.846646	-156.475	144.826		1.21357	266.518	55.6814
		1.39673	6.53781	70.3901		0.267256	-337.021	174.345		0.204308	390.001	6.06638		1.41444	-65.0232	119.364
		2.8024	-62.3762	138.518		0.305515	-341.843	132.438		0.143363	498.96	9.05981		1.53177	-81.1304	165.563
		3.5095	247.849	18.8575		2.64875	270.148	2.61806		0.718978	49.4312	76.5538		1.05264	5.4119	87.3694
		2.84465	13.5539	80.1341		2.39151	190.866	11.7166		2.83466	469.264	2.68159		1.33052	321.94	24.7526
		1.31912	58.6902	55.928		1.5784	0.769552	88.0982		0.366955	-75.1075	173.716		1.92576	-372.382	148.518
		2.34548	98.2389	49.0368		0.994104	-83.4429	143.405		0.493306	67.5451	61.8967		0.506006	477.777	16.5232
		2.28822	92.2467	40.4603		0.331383	-269.883	173.858		0.485093	-83.4597	116.726		1.46381	329.999	35.6184
		1.77933	-0.36109	90.1393		0.891134	38.7039	47.6596		0.291349	-56.1829	111.157		0.0511798	333.687	1.52459
		1.82727	56.6062	64.4615		1.04979	107.503	12.8322		1.23677	21.7223	80.6116		6.36803	-181.456	170.16
		2.85485	88.1765	46.2624		0.561193	-94.4576	158.209		1.10063	99.311	39.9275		1.87979	-59.0867	107.878
		2.4657	52.5926	40.6628		1.17701	76.5769	43.4285		1.44315	79.1341	56.0757		2.62053	9.99401	87.5837
		1.89504	62.1049	54.7328		1.03993	-12.8276	127.177		2.12831	223.835	2.62202		5.47327	351.845	12.9109
		1.68155	98.1763	8.31408		0.0921568	-172.435	145.957		1.18882	-12.9896	120.573		1.23506	-338.713	150.335
		3.15776	7.84934	71.4498		0.872003	-255.862	158.005		1.5288	-74.7993	176.037		0.503807	211.926	43.855
		1.80845	-5.37103	93.5135		1.24537	195.417	18.4884		1.66507	-59.0107	161.536		0.423916	81.0934	43.0284
		1.83369	431.912	6.70032		1.4575	268.123	36.7951		1.33431	32.6862	15.4514		4.54904	117.292	2.24184
		0.466313	146.642	40.3817		1.31763	165.77	50.8292		1.84582	-20.6595	152.627		0.975173	220.008	16.7428
		0.238818	173.693	45.0042		0.342358	79.7229	67.025		1.29702	-24.6323	116.006		4.1428	159.294	8.25195
		2.59549	61.521	33.2339		0.440663	-63.6791	109.6		2.06392	-450.175	177.57		1.42633	130.786	5.74953
		1.63938	-12.6715	106.029		2.49916	-259.945	157.5		3.02387	38.9575	56.5059		2.9363	47.4531	55.1983
		0.791004	-37.0372	173.098		0.921043	321.489	12.3339		1.27603	-63.8444	177.703		1.17256	-263.889	153.025
		0.814486	-6.95009	102.681		2.89863	240.53	53.4785		4.56262	354.209	11.2479		0.651821	131.712	3.81531
		2.30053	51.4951	22.4368		3.26725	81.0768	80.8031		0.132854	-331.916	136.897		0.968129	181.606	11.8754
		1.87207	65.2262	27.5754		3.43457	45.353	81.6401		0.627038	-107.578	104.161		0.33118	-0.956283	91.7251
		1.60898	188.914	13.1071		0.962645	-106.686	105.072		2.57048	-309.217	126.948		0.26812	9.93704	47.4707
		0.817	154.468	25.0865		0.217082	-70.0477	108.501		0.961521	222.693	62.5411		1.41743	39.5758	52.23
		0.956082	174.421	9.22582		0.875277	94.3143	70.9353		0.766511	54.4725	82.6647		1.21422	1.55928	87.348
		1.59106	83.7466	30.4758		0.470008	-162.752	114.696		4.36782	-155.689	115.668		0.827702	-98.3039	167.674
		1.22945	43.9595	44.6503		0.849955	292.91	40.0218		4.7881	-400.588	166.193		0.542552	-139.211	159.681
		1.12822	-27.3772	127.783		1.98064	-485.954	167.83		0.641674	246.302	36.514		0.844156	-224.501	177.777
		1.24217	-22.0803	146.289		1.31957	275.958	29.0813		0.144716	-256.163	175.787		0.798409	203.486	7.58568
		1.01049	-3.04817	140.403		0.260784	-92.3452	120.742		3.37625	-287.17	133.438		1.82747	-5.19848	91.8728
		0.50583	46.7397	12.4839		0.88392	383.432	29.3407		0.804687	10.7297	86.7451		1.11843	175.466	2.94377
		0.703386	48.7997	24.4968		0.847696	-321.031	134.292		0.552876	192.577	44.7763		0.45354	112.879	56.8962
		1.89749	97.7554	24.1875		0.132431	82.2835	0.117184		1.16351	-246.663	122.379		0.74164	-154.41	119.372
		0.377056	65.3707	42.7721		1.69273	148.357	23.301		0.50254	-500.951	167.247		0.748963	-56.9183	112.771
		1.86535	26.8267	22.5016		0.293992	-27.9985	111.44		2.17939	100.112	57.2447		1.06249	60.6107	78.7442
		0.984286	9.99141	62.8827		2.06535	29.4706	86.5454		0.889602	214.698	8.03993		0.85887	32.9334	78.7619
		0.911288	139.154	26.411		5.06825	-277.264	154.688		1.157	0.473133	89.7988		1.46716	-38.942	103.985
		0.588627	-87.242	144.201		6.41043	-237.026	139.508		1.20569	-40.6807	111.533		0.736146	-167.944	127.883
		0.764306	91.4924	56.8005		0.698427	372.198	1.88982		0.686885	-107.566	138.59		0.964034	-204.204	154.265
		0.778328	12.1073	77.5933		0.774172	271.786	36.343		2.66607	-118.246	161.728		0.162383	-39.5996	121.99
		1.31829	-109.137	137.146		5.35062	325.625	32.6396		1.60531	-92.7979	160.558		0.374243	250.627	29.0383
		1.18109	179.927	8.01992		0.103748	135.852	68.8124		2.35667	-138.629	133.784		0.402172	166.309	36.9449
		0.0552188	-17.5667	157.233		1.94197	-104.233	107.058		0.747014	-291.803	162.325		0.606659	327.095	17.6846
		2.02479	-6.17574	97.2013		0.083104	-198.189	128.869		0.382154	282.307	33.8975		0.282166	65.0451	55.0513
		0.278002	156.986	21.1047		0.815532	188.046	37.9844		1.09127	440.694	4.11937		1.56001	230.874	7.61458
		0.900283	61.0273	54.6488		0.15376	413.197	20.3788		0.455768	223.251	27.5376		0.665056	131.559	9.44545
		1.89838	100.057	51.2942		4.95155	31.8024	77.046		0.274641	-35.8147	97.373		0.173095	86.4031	42.505
		0.570699	93.4463	78.16		4.59677	-112.049	106.957		0.171303	37.1513	80.1707		1.10572	335.326	36.8819
		1.16036	23.4608	82.6766		2.68971	-80.5929	110.867		0.406095	-369.504	160.382		4.29974	238.311	16.9682
		2.50877	109.63	53.7308		0.996093	106.543	70.9441		2.03903	-309.512	170.025		5.94132	-179.839	140.842
		3.0209	79.7047	51.9199		1.40326	-103.465	112.012		2.32277	-458.25	153.898		3.41445	-26.2699	142.233
		1.17227	5.89014	86.6028		2.84876	232.649	19.5089		0.536443	389.814	33.3437		1.85394	-318.82	161.591
		1.40858	82.9479	9.05002		0.729023	26.6461	70.5674		0.984792	368.076	3.02795		0.422658	-186.211	178.221
		0.939958	113.36	24.8054		1.60151	23.8323	22.6081		0.822727	-402.108	140.992		1.34098	213.828	19.0559
		1.16331	24.1688	78.7041		1.87925	24.1685	52.9387		0.210822	-42.5475	95.4728		3.21143	51.1578	39.8568
		1.90018	96.6627	14.6058		0.972633	-40.3662	169.167		4.00818	-65.3407	97.8475		2.01812	-42.7956	101.9
		1.28466	102.806	3.41474		1.55033	32.1424	64.1614		5.71989	-488.966	170.54		0.605734	23.7265	69.7667
		0.626479	350.479	19.804		1.88094	90.5456	0.533609		1.73992	-126.13	131.651		0.86931	252.747	0.108344
		1.3735	-0.726486	92.3994		0.725621	-20.5585	156.019		0.702301	7.95405	88.4221		1.07237	214.245	37.8726
		2.32977	35.6196	1.31236		0.871274	23.2645	45.1472		0.557682	-15.5077	97.0968		6.32359	-78.2553	116.118
		0.962357	-31.5649	110.775		0.854339	-5.13992	90.6256		0.660428	-360.092	149.751		1.35596	-51.9128	103.097
		1.6361	-40.0253	152.247		0.877472	-484.457	176.254		1.22814	253.926	45.8994		4.93302	-97.8779	112.927
		1.17659	-40.2968	164.215		1.03282	-197.667	174.839		1.03963	163.482	64.685		0.534769	-56.4064	125.045
		1.51517	23.9421	30.206		5.77244	-428.415	161.503		3.51908	63.9798	76.7604		0.628936	47.7963	70.2277
		1.72844	46.4005	30.049		1.29421	55.5975	67.3503		0.954121	-371.244	135.884		4.06782	-178.689	125.609
		1.02376	34.5453	23.1292		0.592346	-137.979	162.721		1.30916	-120.17	138.035		5.39876	-22.1883	146.387
		1.23864	-15.0001	137.856		1.31048	231.277	35.5461		0.0863894	115.516	76.5129		0.866888	-181.161	140.668
		0.61548	101.914	22.4591		1.68442	233.983	11.1446		2.94079	30.787	14.5547		3.29335	459.974	15.5251
		1.52352	142.362	9.62337		2.11307	-386.484	150.841		2.08769	-95.4152	145.46		0.0913139	53.3061	82.5818
		2.27617	130.931	5.13962		1.93747	22.7247	87.3429		2.54619	36.0918	72.0322		1.67077	-152.476	114.981
		2.45069	-62.2659	168.863		1.35658	-189.796	113.437		1.69756	410.974	3.07938		0.622658	-90.0542	121.935
		0.432779	-32.7707	133.01		0.389402	-257.318	126.838		1.03706	70.5534	59.9498		0.386628	-304.716	142.417
		0.912419	82.3347	5.26225		0.69122	29.575	85.9885		1.68742	-138.328	128.321		1.46297	64.7024	24.7781
		1.91722	93.7506	21.2109		0.582224	-71.6841	142.373		0.527233	-131.068	112.971		2.58286	108.888	20.9364
		1.6747	-25.0441	133.972		3.80381	-146.885	112.57		1.48485	262.823	4.51343		4.26784	-207.561	135.461
		0.534686	-76.0017	167.651		1.31775	36.6449	72.3284		1.21801	-23.8139	142.036		1.53459	-22.8961	93.9255
		0.569792	3.28702	78.5937		3.69183	103.484	78.4577		1.8354	-371.132	175.185		0.646966	-192.66	128.576
		0.827677	71.7282	25.1714		0.268267	-351.081	173.849		3.68918	-32.9496	106.171		0.414311	29.2745	80.4921
		1.70376	62.2221	6.0357		0.857983	-461.823	174.143		1.39935	146.38	62.0964		4.01973	-178.229	122.764
		1.05172	0.650692	87.5326		0.745555	208.412	63.931		1.64144	-412.598	166.346		1.22342	26.2508	38.345
		1.5599	-60.5079	130.137		1.52306	182.248	47.08		0.894176	85.845	65.7349		2.57266	180.265	46.2535
		0.764645	-61.4396	152.769		1.44586	319.956	24.5228		3.17815	-220.541	176.79		3.68633	-40.1291	129.418
		0.956395	-26.577	149.315		1.98245	429.626	14.094		1.41831	-332.588	153.774		1.23849	-304.142	133.472
		0.448248	57.0689	24.0409		1.24911	169.357	61.7013		4.98778	-340.354	156.589		3.00538	-292.603	131.203
		0.341195	64.8126	47.6443		3.66106	395.42	26.9854		1.78815	186.949	22.6316		0.915842	-240.926	141.516
		0.936802	21.6997	69.2928		2.93042	182.935	45.5066		0.832224	130.512	51.8661		0.642772	65.802	62.4413
		0.62077	7.67761	86.3957		0.741865	-189.845	123.576		0.592158	343.187	29.8818		1.7079	49.5136	40.8017
		0.5361	51.6043	75.0793		2.33053	-186.58	140.729		1.50061	475.908	5.6795		1.50153	-56.6995	108
		2.1085	191.862	31.82		0.548911	-313.747	151.656		0.731284	53.2656	36.0768		0.331162	-351.481	157.179
		1.36213	98.881	58.034		2.13847	327.84	10.2048		1.04394	14.0331	47.116		5.24284	188.08	19.5127
		0.961009	221.763	9.40517		1.079	84.9281	80.0116		1.6984	63.8379	9.70217		1.55518	357.599	10.561
		0.752798	200.115	0.149476		0.638593	19.2274	53.0522		1.09657	75.4956	8.57101		1.57569	288.979	4.22082
		1.15306	139.238	4.57278		0.797659	54.0127	11.8321		0.852078	28.6685	25.1566		0.440335	-380.814	175.493
		1.7263	-130.012	146.357		1.73558	42.6145	0.130709		0.777949	-3.42894	102.848		0.900653	-116.799	167.177
		0.428618	200.226	15.866		1.01177	-56.6643	130.519		0.604247	-121.987	151.375		0.599069	346.749	6.42529
		2.10675	99.7919	31.697		1.43779	54.0435	47.87		0.927296	-223.517	148.663		2.35337	152.792	14.4263
		0.589522	90.6788	24.164		1.04979	15.1772	65.855		1.22338	87.4009	55.5184		1.51847	118.876	5.18477
		0.24284	61.2457	66.5643		0.965091	-32.4997	119.551		1.36289	68.3007	14.5216		0.571819	77.6302	61.3157
		1.93263	217.912	11.3095		2.45505	282.954	31.317		2.27392	-70.6824	179.812		2.77915	156.01	23.2611
		1.55955	54.3996	70.0601		0.741059	65.053	67.9993		0.926278	-142.661	152.424		1.22241	5.39392	87.7765
		0.779299	261.438	4.18834		0.874325	-16.193	97.1282		2.34919	39.9251	75.6867		1.56844	457.731	1.71377
		0.11314	190.514	20.5554		0.723051	-160.873	111.98		0.619454	-41.4613	97.6584		1.25681	169.827	10.8296
		0.996926	245.577	1.60166		0.64624	-204.04	137.874		3.04108	-389.058	159.639		0.221967	167.713	53.5985
		0.737671	-202.176	157.989		0.276241	-28.0244	98.6449		3.87062	-84.4424	158.091		1.76035	39.0019	80.3513
		0.645273	303.424	9.27363		0.826083	-195.884	169.211		1.90403	-208.902	165.982		3.58093	-190.861	113.979
		1.83274	294.954	3.07295		0.939484	60.6146	4.97787		0.332213	-504.861	177.115		4.3931	74.6537	54.7626
		1.61681	183.808	19.0151		0.698841	21.9721	59.9161		0.368553	-133.01	140.257		2.59985	-24.6078	102.879
		0.886645	110.012	30.2938		1.14672	61.9147	36.0658		0.870303	-189.42	147.145		1.47397	19.7871	79.3094
		0.960731	164.273	9.59318		0.335328	-1.63734	100.55		0.986325	142.439	39.0287		1.57982	-88.4626	176.073
		0.46817	101.893	39.3815		0.20243	-17.8833	110.088		1.02387	-46.3219	101.363		1.1409	59.6634	54.7226
		0.298567	69.8016	66.2404		2.12243	-107.586	113.147		5.2208	-289.43	149.736		0.478552	86.274	33.8791
		0.471095	211.078	37.6219		0.512191	-134.666	108.62		0.543151	172.757	47.3527		2.28937	22.8138	76.8492
		1.35799	-157.162	155.615		1.14088	77.3943	48.8444		0.666232	-180.027	129.602		2.19705	-64.7584	105.228
		2.82869	327.207	6.48008		1.13739	54.1249	56.0418		3.19643	-256.234	131.203		3.1301	-211.18	164.661
		0.685183	155.571	15.5648		0.0205164	30.3966	65.8653		2.09608	348.977	37.6491		2.94012	-35.3097	144.426
		1.78158	257.904	5.00601		0.580252	19.871	59.3962		0.478414	-284.006	136.125		2.96861	-41.4025	146.661
		0.739403	237.707	6.58692		0.765536	50.7552	46.6891		0.215432	251.172	12.5678		2.92675	-89.695	160.116
		1.20141	256.098	16.0652		0.572927	-213.679	130.494		0.168207	363.617	23.6988		3.4622	-8.46735	101.024
		2.16382	-232.86	169.234		1.26692	442.555	6.29254		0.401086	-50.28	161.129		2.92422	-77.4885	170.421
		1.62772	265.958	3.99157		1.04959	-469.083	179.824		0.245788	97.0667	39.2248		3.15075	-281.997	141.666
		1.67962	217.444	13.5917		0.69655	88.1774	59.6132		1.65395	150.174	33.9183		1.99627	31.5387	39.4641
		1.00791	108.62	25.8068		0.279051	311.806	29.8176		4.83232	336.865	38.9356		2.1076	-6.57553	143.93
		0.693859	157.16	18.7202		0.104629	102.442	62.0526		0.388324	-411.522	161.509		1.9474	-11.3142	149.682
		0.418578	2.74994	88.7838		0.297978	222.528	30.2694		0.85251	-309.282	150.429		2.77586	-35.0662	110.955
		0.401721	-45.8264	106.103		1.15294	150.2	53.27		1.07343	-438.611	164.603		2.52261	-85.5824	132.671
		0.763942	163.14	34.8018		2.09871	202.81	34.7967		0.77659	308.35	2.66952		2.71171	-143.293	156.647
		0.340972	286.679	17.6872		0.836143	139.974	5.12036		0.500176	48.1016	20.6021		2.78885	-176.973	156.04
		0.795542	31.9139	56.8733		0.955605	177.229	22.2788		6.13943	-71.2216	153.254		2.57393	-22.0506	111.874
		0.833726	-266.494	167.268		0.128796	175.274	11.4557		4.21685	-137.543	110.559		2.81093	-142.812	165.398
		1.97172	78.8556	49.7365		0.699166	174.94	3.67972		0.586076	202.473	41.3837		2.25246	-141.26	161.888
		1.6298	67.1216	5.85011		0.736527	322.259	8.62005		0.760017	-11.215	136.407		2.12653	36.3915	8.55546
		1.17212	86.0864	21.1307		0.26593	491.614	6.71565		1.06393	100.623	6.10418		1.72012	-66.2516	168.363
		1.25811	69.6409	11.4936		1.47571	443.146	23.8129		0.3525	187.605	10.9653		2.41222	-29.3041	107.48
		0.524407	33.3815	44.9777		0.874547	402.327	8.6917		0.733379	64.6329	41.1483		1.56515	81.9525	40.549
		1.37078	68.701	46.329		0.622368	-444.984	174.855		1.58881	84.3416	21.7609		0.285472	-1.25236	91.5139
		2.0448	29.1793	49.7962		6.21365	90.8979	75.0323		2.15722	110.224	40.5146		0.75525	-45.268	135.193
		1.37733	118.592	19.4378		0.738004	207.112	17.0435		0.961919	160.522	43.4003		1.13775	74.6505	45.1526
		1.98459	210.908	2.32322		1.80675	212.772	6.8626		0.9246	-105.735	127.555		0.201161	-9.23463	95.1109
		2.17847	182.317	24.6136		0.852392	122.303	15.7258		0.709154	375.067	10.8634		1.38621	53.4962	45.8714
		1.76965	62.3097	32.053		0.813651	209.988	14.708		2.46583	-269.828	123.157		2.83184	60.9011	45.8843
		1.07441	258.012	27.5875		0.322368	198.889	5.86111		0.68034	93.1576	76.3164		3.34245	71.5941	15.361
		0.611851	94.2829	14.4663		0.703697	201.5	13.8715		2.84971	185.708	60.5964		0.942889	39.4555	7.36071
		0.821573	-362.279	171.99		0.114079	33.5454	74.9094		4.83365	-313.715	157.953		1.57343	8.00254	81.9023
		0.71641	-214.041	131.511		0.237105	89.5535	50.4275		1.04709	343.663	38.4096		2.49463	-352.981	150.238
		0.52383	-5.01178	92.9421		1.04477	197.469	22.4265		2.04117	-102.292	152.033		2.39911	355.692	12.1611
		1.19618	133.355	24.3078		1.01965	433.116	11.7583		1.95117	-28.9457	106.93		2.68989	100.357	78.144
		2.45321	301.14	20.9315		1.37198	-18.0567	92.9723		0.0684932	218.378	48.9289		1.78138	-78.7463	130.46
		1.89574	222.08	8.5008		0.999604	-6.61244	91.0213		0.201617	285.85	34.9817		1.46681	-41.2212	107.307
		1.33267	332.835	11.8749		1.14434	178.021	24.1127		0.212438	-39.1648	166.244		1.95006	80.3541	7.57491
		1.92965	385.363	35.7545		0.94909	118.813	22.4205		1.17161	-441.61	149.849		1.2256	-58.7571	101.997
		0.818492	113.47	2.95877		1.89497	-41.4137	100.79		2.88571	-505.405	166.556		1.50502	-77.6529	151.217
		1.22439	-28.7598	100.51		1.49893	-37.9568	155.031		0.794392	325.106	34.2358		0.721087	-31.9449	117.084
		1.12917	250.658	4.36643		1.43949	-28.9475	155.068		1.31973	386.25	32.0977		1.56779	-127.586	179.172
		0.541255	80.4392	63.8685		5.56397	-44.1361	123.436		0.150244	-199.13	152.812		2.24911	58.7526	33.434
		0.95543	59.3551	63.9269		1.01579	10.7465	70.0248		0.552329	39.9413	70.1459		0.522713	-3.48983	91.5922
		0.585163	104.17	40.968		0.737011	-29.5589	131.228		2.10322	347.528	6.84748		0.961146	-34.731	119.502
		1.78773	283.04	4.81359		1.57428	-15.0764	174.229		1.67784	-2.27351	91.9717		1.80727	66.4804	73.3669
		1.87249	207.286	17.4975		1.31361	29.3016	12.3471		4.16788	186.514	44.8936		2.86713	-17.4084	96.439
		1.58156	74.5527	31.529		0.453228	275.809	13.5205		2.36613	-416.852	166.548		0.912321	-79.6254	157.756
		0.38119	-236.041	151.32		1.73256	406.519	14.5466		0.623215	-36.3779	113.445		0.490206	75.0556	43.4055
		0.699801	-17.4574	98.8374		0.740817	-382.39	155.789		0.530016	-190.805	158.684		0.949148	11.6702	71.6997
		0.95994	40.5411	71.907		1.19693	311.361	52.8993		0.247807	-440.815	168.943		0.216056	202.436	28.4835
		1.53427	97.9891	1.20681		1.05457	-203.163	130.704		0.992977	25.8662	56.4111		0.142493	363.168	40.0965
		0.646621	-50.3938	164.076		1.8939	-271.466	132.331		0.646858	72.809	29.32		3.02383	309.51	20.4431
		0.910452	27.3118	12.4865		2.43441	218.451	2.86711		1.30235	-262.241	121.067		0.497194	177.396	24.2326
		0.9453	104.052	30.3882		0.21837	96.671	6.51893		1.79504	-363.625	152.697		1.12892	185.383	33.7936
		0.799136	225.032	12.7787		1.2253	-98.8195	174.102		2.58475	399.568	7.03864		0.910207	68.9896	61.0118
		1.36246	51.7504	20.5158		0.744097	92.6738	23.3596		3.87405	215.748	12.7124		0.608481	22.8257	57.6775
		0.162517	33.6356	8.11167		0.738039	-42.0167	121.15		0.610053	231.046	4.00645		1.31517	-155.017	148.712
		0.433424	16.3131	77.9157		2.39098	54.9482	58.9863		6.41133	33.0654	85.8007		0.599213	-357.823	139.763
		0.678405	69.2162	54.8116		1.20338	-155.051	160.602		0.978203	-175.91	138.821		1.02822	-23.5894	94.6404
		0.699169	17.8856	79.1		0.455953	-317.8	169.487		1.0216	-112.455	156.851		1.41052	-135.581	173.804
		0.879222	121.476	33.3762		0.574992	-316.095	177.128		1.02024	-310.761	136.105		0.266783	27.1394	78.4989
		0.473236	108.938	26.7098		0.965229	118.913	44.4697		1.54966	-365.795	135.411		1.18042	86.7582	31.089
		0.551776	84.3271	44.947		0.560422	15.9157	25.4625		4.84465	204.381	46.7047		1.28868	-0.979834	90.6816
		0.477441	111.911	23.9325		0.557415	73.4778	0.38424		1.04823	308.437	39.3727		1.6667	502.733	9.48493
		0.867289	82.5232	18.0831		0.721656	-128.499	178.264		0.421408	-150.431	114.363		0.559541	-116.213	136.54
		1.4421	147.103	10.9683		1.5754	139.873	20.6643		0.735017	-389.405	156.072		0.98391	4.96834	87.2624
		0.534653	66.9203	28.682		0.628964	30.8562	22.348		1.10232	225.557	35.0399		1.64991	441.466	22.1363
		0.570888	35.0815	48.1928		1.82434	-13.3198	104.94		2.01898	61.9513	44.6579		1.8597	128.194	53.7604
		1.11407	88.4222	18.6549		1.24681	109.092	4.53618		0.695415	-402.263	165.457		1.2645	291.086	14.8866
		0.290552	137.104	25.4099		0.719811	-131.31	124.725		2.54275	-430.474	174.959		1.73683	14.2502	81.6201
		0.702512	167.52	49.406		0.956884	30.2562	33.2025		0.362461	353.985	43.0737		1.84402	28.9234	65.8979
		1.34469	255.737	19.1132		0.598944	309.433	4.97534		0.178289	137.677	72.9358		3.04074	-238.46	122.527
		0.201658	338.783	12.9968		0.661351	187.621	20.4128		1.50924	347.634	13.9019		1.07648	156.264	18.9951
		0.947435	383.97	17.4852		1.47336	226.382	20.4998		1.03049	155.489	24.0929		3.85084	-219.324	128.001
		2.05829	268.402	13.0875		0.595789	64.3706	42.8728		2.48932	163.153	16.8979		0.900447	-236.024	157.593
		2.06396	47.1043	70.2064		0.596804	-51.0418	150.723		6.4273	-42.7752	99.1251		2.02508	263.257	20.6037
		2.18387	-75.6249	114.723		0.653215	67.2232	40.4717		0.98202	306.477	18.2983		1.40207	120.033	10.1748
		1.34198	-218.703	147.334		0.304271	85.6629	40.8984		0.85757	206.28	52.1755		0.32637	23.6169	25.7571
		1.79749	106.282	31.0795		1.10825	41.9447	45.1486		1.766	-132.216	147.857		1.60294	-0.990794	93.2133
		2.64467	355.916	23.9436		1.22706	-118.617	168.14		2.00081	-98.8388	140.567		1.89158	-117.458	174.325
		2.28549	150.524	45.5501		0.567102	5.70066	72.2052		1.61373	120.9	66.2882		4.4032	-155.499	133.725
		1.9723	47.7429	67.0189		0.858121	-26.8856	133.816		0.934372	-186.01	166.153		1.91926	-63.5332	109.581
		1.88455	-9.91048	96.0539		0.644519	75.1893	43.6049		0.86963	-45.5749	105.131		0.413903	35.8052	84.7448
		1.00571	33.9794	75.7709		0.999589	42.9683	13.0075		0.7735	116.807	33.7514		0.879717	-14.5318	94.4224
		1.25276	-24.0512	146.04		0.243248	-16.661	170.868		1.82152	197.435	53.5979		1.13326	-124.505	169.14
		0.753661	20.7887	58.6051		0.111124	37.0912	31.5203		1.52022	-33.473	115.904		0.591982	-350.374	166.851
		0.945646	36.5026	39.0949		0.583386	34.6247	68.3737		1.31723	301.214	15.6886		4.21767	254.181	1.90348
		1.99419	256.139	9.61999		0.677922	-56.9764	124.418		1.45298	242.722	50.9299		0.826619	-358.417	166.51
		0.263353	179.19	1.64438		0.47027	327.522	10.1588		0.552357	366.636	42.4286		5.33375	462.364	13.9604
		2.83441	195.737	35.2219		0.820758	282.473	8.49317		4.0308	134.624	44.6988		4.16591	-82.6501	133.493
		2.03203	-54.8328	110.237		0.831943	106.722	35.808		0.380822	-149.294	164.082		2.56923	216.971	64.6715
		2.17241	-238.581	136.036		0.752286	-17.2452	105.107		1.26745	270.507	55.0579		2.76134	114.905	69.3241
		1.74354	126.383	42.4446		0.93038	-9.8288	98.7087		1.51939	204.852	58.6069		1.28601	-135.893	118.294
		2.58467	141.129	66.0621		0.354676	182.672	1.56981		1.33845	279.419	54.3198		6.39744	150.781	60.8322
		1.81264	-108.525	108.551		0.207634	-125.129	150.512		1.96103	75.0607	79.0184		0.659804	-159.039	134.673
		2.13677	197.984	8.68147		0.949996	-204.277	130.288		1.09561	131.986	70.9957		0.837799	333.109	32.0247
		2.26255	155.047	3.09601		1.40991	207.735	18.2203		1.34099	54.1344	82.2074		1.31998	266.371	10.8129
		1.50907	43.3827	55.6403		0.410994	36.1672	31.1347		3.08894	216.55	26.5947		1.40514	16.7703	68.104
		1.91587	403.031	9.36083		0.393741	98.7665	8.4351		0.436835	20.0316	81.8424		0.486023	362.09	8.41245
		3.31001	307.236	11.7101		1.04834	94.6909	6.61593		6.23266	37.127	74.8689		3.82429	-42.0682	110.549
		1.28563	238.549	45.7051		0.452932	-32.6154	119.74		2.38214	260.586	45.2717		1.99079	-308.878	148.085
		1.10881	152.296	68.196		2.58862	271.217	4.91102		0.690403	-227.133	166.643		0.189188	-371.801	147.127
		1.13217	-221.521	169.983		1.43486	29.0628	47.7908		2.80322	-55.6336	143.344		1.13227	-6.78795	91.1932
		0.364965	-267.169	170.117		1.39515	-54.7403	113.099		3.91221	232.691	9.77129		1.61671	197.392	27.6432
		4.20067	-357.973	148.688		1.18822	-19.0783	112.049		1.52326	-173.332	160.57		1.93473	-99.5911	131.52
		0.426623	29.4459	34.7281		1.01428	-59.6184	147.071		3.88805	131.743	74.9337		1.151	-38.046	129.789
		1.80265	33.2871	23.9979		0.938729	44.6429	56.3601		2.89896	-213.46	159.79		0.794263	-434.814	174.33
		1.88901	26.4911	72.7219		1.08443	18.0664	9.0291		1.0202	178.635	51.4627		0.418833	-53.7955	109.56
		0.525331	-152.112	144.818		0.959726	205.641	7.08466		3.33271	-254.879	166.533		0.567763	-41.3515	121.064
		1.60834	64.2033	29.867		1.26422	395.549	10.7354		1.51953	228.786	35.9087		1.02063	-315.466	172.365
		0.605139	-14.5062	106.407		1.18027	213.05	38.9194		1.75197	-215.657	164.519		1.26946	-466.479	167.324
		1.05368	-61.5855	97.9248		0.722629	266.599	18.5126		2.92803	112.764	19.7748		0.400396	31.8947	49.2856
		4.86133	242.332	46.422		1.34535	308.608	40.0925		3.33626	-275.388	160.067		1.61021	33.0414	39.8
		0.666715	65.8452	48.4345		0.989038	-80.3007	103.176		2.2984	-306.119	177.611		2.27551	-106.647	154.098
		2.01376	61.0164	40.753		1.93192	-287.293	165.407		1.24856	152.076	18.0551		0.848396	-132.875	167.989
		1.3583	148.273	8.72436		2.57759	-82.4732	123.289		0.974144	-12.955	92.2047		0.590879	-139.873	137.243
		0.662579	108.664	36.9957		1.04174	-480.439	167.539		2.81096	-125.227	119.835		0.27841	4.09366	88.0832
		0.638128	177.811	29.2663		0.470393	-17.4513	100.066		3.81357	-65.6958	103.814		4.67761	-59.9667	130.628
		0.27979	329.282	0.554163		1.23233	74.4694	10.9407		1.2149	-101.506	164.182		3.68217	410.935	21.5008
		0.317941	-467.221	157.026		0.918935	-7.12756	98.404		5.91052	-250.885	175.31		1.14503	-230.699	170.6
		4.26934	74.2168	38.0568		1.04432	107.599	21.6938		1.59516	-331.82	148.528		1.94661	209.823	46.0643
		1.802	-92.1552	115.62		0.894913	167.241	3.90238		1.00986	-176.988	153.1		0.869076	-118.116	158.202
		2.15602	127.885	21.3252		0.912102	187.891	4.66122		5.55468	81.4725	36.4152		2.20739	134.172	34.3304
		1.84296	146.861	18.7937		0.82247	21.317	68.6167		0.502015	496.858	12.1371		1.0289	-164.651	166.003
		1.71354	76.9271	15.9693		1.00521	-35.6422	130.832		6.11164	166.052	48		1.27727	-16.339	98.6645
		0.386306	56.8627	51.5836		0.692698	163.339	26.7559		2.02378	0.441163	89.7156		5.92197	64.6387	9.63884
		1.97753	160.33	5.93019		2.19842	173.168	22.7168		1.18929	11.783	86.4001		0.592559	296.798	52.0756
		1.54223	204.54	25.6846		0.452114	54.0592	18.2703		1.69346	-157.643	167.792		0.768481	99.7152	53.7595
		1.14948	59.9331	48.1032		1.05349	118.031	5.14768		1.56402	480.26	5.65601		2.19747	267.946	35.4748
		2.1266	44.6034	31.8722		0.695932	87.932	12.858		1.48988	-133.433	124.874		2.9105	167.904	32.5621
		1.34009	-90.0786	162.07		1.48953	-20.2432	92.9353		2.41894	-173.484	128.748		6.04158	297.976	3.24275
		0.327236	-20.3673	117.727		1.42374	-234.303	125.25		0.343185	-253.744	176.102		2.56474	107.968	54.5384
		1.8411	-7.38441	148.888		2.6059	-350.844	167.892		1.78672	-62.5592	170.144		5.9395	191.843	26.7314
		2.22375	62.4134	21.9843		0.699996	161.407	55.8075		3.09141	-321.74	176.534		0.324053	-219.663	135.289
		1.64113	-8.50393	102.349		0.4541	268.289	48.6337		0.881934	-223.593	173.063		1.01703	-63.959	98.169
		1.53021	5.49105	2.81889		0.626088	309.898	16.3801		1.14394	-180.433	173.36		0.536381	83.4655	64.4439
		1.57985	-11.5551	113.443		0.898644	-296.476	161.638		3.05366	473.437	19.9734		2.35451	129.754	52.2193
		0.929719	-32.6483	165.58		1.27021	-79.1152	101.066		0.803668	129.028	50.0936		0.83462	-40.2915	106.532
		1.70929	-48.0957	164.964		0.642925	-258.443	130.744		0.860572	-387.145	165.62		1.73881	363.555	4.73875
		1.61203	-56.3935	150.509		0.509352	-261.975	126.41		4.94708	-430.292	177.234		5.21764	-240.378	164.378
		1.32938	-102.618	177.363		0.451912	-359.755	157.2		2.1153	-105.673	179.148		3.35121	77.1028	69.1785
		1.18116	-26.908	159.516		0.990976	-424.87	162.138		0.469752	236.011	20.9372		2.09161	-54.0924	113.01
		1.46307	270.491	18.0007		0.955666	252.042	46.9046		2.93957	-77.6231	113.587		3.85488	8.60985	84.8316
		1.31212	209.129	14.3436		1.69075	229.332	62.4533		0.908875	450.901	0.335968		3.10691	135.777	32.6521
		0.843122	160.171	20.1715		0.254719	175.402	57.9366		4.58244	-482.5	159.889		1.11999	-102.532	116.262
		0.497536	109.051	42.1602		1.22874	123.131	58.0852		4.16503	-37.2547	99.0403		1.85879	177.794	41.3483
		0.707672	143.853	14.0459		1.07923	-73.9695	106.91		2.05341	-398.222	176.148		2.41247	95.1521	19.9933
		0.622464	53.5113	28.8483		0.674143	-96.839	115.545		2.98114	-381.135	174.921		1.11518	-118.632	120.881
		0.642007	-2.87104	96.3026		1.29598	-276.724	131.587		6.40014	78.1097	59.8961		1.8096	227.982	8.1531
		0.601437	79.9378	34.5085		2.59257	55.8776	42.7875		1.08365	108.02	76.5512		1.67186	44.0575	46.5039
		2.76337	-8.30478	97.5433		0.766862	133.773	18.8397		2.61678	141.441	69.7354		1.78458	-76.383	122.104
		2.37726	4.31576	77.8979		0.528081	161.36	0.833543		1.03542	159.842	48.1026		1.33879	34.7954	5.14694
		1.26202	35.8056	28.5295		1.27553	39.759	18.587		1.55916	-285.144	143.298		1.10301	18.7593	56.6824
		4.09343	86.2863	33.2453		1.44113	-67.0304	179.114		1.72114	-232.183	173.02		2.24251	-273.351	123.724
		1.55119	69.856	63.1599		1.80989	-287.09	137.23		4.34267	-207.49	179.871		2.28298	355.066	19.4371
		2.31034	142.2	9.85067		1.02442	-321.993	148.222		2.03863	-224.494	154.048		1.8503	-245.128	165.927
		1.55087	143.802	5.44347		1.38984	202.454	14.5025		0.201966	237.105	23.1366		2.43293	102.278	71.9705
		1.98491	196.126	16.034		0.183267	202.599	15.5914		1.58937	152.272	29.3154		0.587826	-260.482	143.815
		0.756874	119.036	7.39564		1.21857	247.928	13.2494		0.676984	-96.7595	141.034		3.4288	50.7373	23.9104
		1.95771	96.6779	36.0551		1.09839	121.886	38.2614		4.2754	303.716	41.983		1.57183	-318.127	168.3
		0.375151	189.207	11.4698		0.0407565	50.4602	55.7366		0.586194	-332.551	165.091		2.39684	236.055	5.39238
		2.20184	192.569	24.5506		1.00876	111.033	4.55759		0.539217	-79.7454	128.891		4.18024	200.625	13.1616
		2.18136	193.714	28.2534		0.844462	115.86	22.0841		1.2587	-38.2645	105.507		5.74063	102.207	21.4882
		3.02919	206.353	17.0259		1.17293	278.73	7.32168		0.727227	-2.68697	161.557		4.30432	-228.892	143.763
		2.28834	145.927	15.7661		0.494813	142.474	14.0057		0.182685	-77.5721	135.385		1.31444	110.94	40.2248
		1.89269	146.467	16.3313		0.613016	196.318	15.0555		0.300815	-25.424	173.194		0.595249	155.669	65.8078
		1.49189	204.835	1.08784		0.209937	161.825	39.7674		0.579678	-29.996	179.612		0.117609	340.02	23.7999
		2.34151	165.798	10.4216		0.150293	135.021	32.1655		1.2623	-157.331	165.426		0.142437	22.3491	83.9998
		1.98346	263.767	21.6244		0.893883	147.855	12.7324		0.385578	142.714	39.7644		1.07041	31.6744	78.5265
		2.06177	169.308	10.2629		0.733281	182.925	5.07789		2.9503	297.033	9.16109		2.19019	-13.0055	92.7605
		3.15268	177.093	4.7462		0.610562	188.138	0.123022		3.45699	-39.6878	98.09		2.47578	-51.6097	129.244
		1.48265	91.4708	41.4834		0.768966	-474.384	163.528		1.75075	304.917	46.8978		1.1117	-119.048	179.5
		2.09419	125.649	35.5897		0.959433	307.866	51.6916		3.61216	-37.6932	98.0234		1.88181	-270.289	165.965
		0.684748	24.9592	64.7996		0.382959	-219.617	137.978		2.69363	-507.205	174.436		0.835699	-179.214	153.773
		0.388801	6.20572	85.4336		1.05045	149.269	66.1239		0.488673	-17.298	99.9268		1.07649	-411.978	158.385
		1.74458	147.597	35.45		0.489334	-12.7409	108.868		0.191792	23.1828	84.1507		0.617638	282.242	54.0116
		1.25704	100.903	37.047		1.52104	297.779	22.5078		1.52658	204.236	24.4534		2.92068	3.11925	87.8172
		1.03348	97.4703	3.725		0.673939	172.233	15.8397		0.792798	-435.964	179.515		1.13938	-120.836	135.978
		1.59796	120.576	0.56071		0.712547	253.96	18.5338		3.69808	-415.284	163.714		2.71629	-333.928	160.224
		1.30874	109.106	22.6108		1.38939	175.78	32.2483		0.810962	-222.077	132.397		2.28852	-76.603	102.31
		1.33088	76.7984	33.7521		1.65468	289.792	33.7048		0.632644	211.005	33.2566		2.70344	-367.224	158.179
		0.302951	34.2774	66.8987		1.10556	8.98191	87.8607		6.3789	434.562	7.72077		1.94535	409.841	29.1125
		0.334866	134.249	3.12456		0.431339	122.355	59.5562		0.630955	-407.897	158.376		1.65932	66.7803	25.6051
		1.7022	142.896	9.79594		0.660679	-47.9302	96.3697		0.489178	-266.73	136.916		2.23334	-247.756	154.472
		1.68869	251.811	4.88017		0.141849	148.117	71.3585		2.39534	-22.0128	93.3176		1.71649	70.4439	7.69791
		1.40093	225.832	6.97497		5.32406	-25.1445	99.8795		4.43785	-345.69	139.824		1.11465	4.16498	88.0713
		0.998241	279.345	16.0872		0.225833	65.7912	79.5161		4.24738	-247.99	120.348		0.175739	-251.595	172.401
		1.02281	248.759	3.81454		0.0281694	-210.463	131.488		4.64823	435.43	28.079		1.95111	4.0508	86.6408
		0.760681	160.794	15.515		0.122143	-15.2545	92.1337		0.295829	-212.073	116.699		0.887324	-339.309	136.318
		2.61048	64.5833	59.0747		2.21788	-277.387	135.613		0.222019	-456.9	160.304		1.73122	-241.529	170.152
		2.11223	-20.3979	92.4199		2.09765	-247.745	153.007		2.66963	-65.7185	120.123		2.39326	382.939	13.4439
		1.88132	26.9664	30.4525		1.63919	116.552	24.0766		2.19212	38.6263	83.886		2.97441	347.522	10.3689
		1.24752	1.10635	88.9415		0.749124	141.107	37.0831		0.921431	175.47	0.377224		2.12956	122.124	30.7462
		1.97978	20.8248	69.1424		0.720235	299.8	20.0676		0.60249	182.889	57.4477		1.89089	37.4786	73.4569
		2.00866	54.4292	38.6386		0.466642	174.991	48.0024		1.75232	154.211	64.5468		2.95716	116.679	20.8757
		2.41593	13.904	80.4628		0.599197	188.736	65.4927		3.03545	-314.896	146.112		2.5844	47.4041	36.7167
		0.685524	18.8109	70.5913		1.30393	301.704	23.6188		4.30711	-17.4939	112.891		1.6046	-212.502	171.505
		2.8362	102.345	2.15181		1.00412	137.392	26.9727		0.378546	68.1372	72.2034		1.14739	-216.065	165.825
		2.96458	151.47	27.0173		0.669424	43.8822	69.9193		1.87119	-266.339	159.84		1.83886	357.883	46.3485
		1.27171	7.71272	84.7735		4.48464	-151.611	143.088		4.96668	-221.033	158.907		1.32747	289.618	39.5673
		0.496416	-54.9762	166.783		2.14534	247.026	1.89506		3.45429	-401.238	161.274		1.23489	-325.025	131.564
		1.49338	-38.8488	158.948		0.378976	210.429	44.5778		4.1482	-91.8862	144.509		0.691184	-163.063	168.316
		1.42648	-133.301	165.118		6.45877	369.606	19.0832		0.0867705	-484.404	165.121		2.14316	-15.457	150.873
		1.42907	84.6454	8.66327		1.19593	-31.469	107.839		1.19332	-285.237	167.363		1.03922	225.877	21.3352
		2.51108	63.5749	35.5569		1.0414	-87.2576	138.757		2.94121	-470.972	179.52		1.48647	114.504	57.1791
		0.810629	178.049	33.4409		1.49875	250.849	54.9201		0.98503	-60.5855	119.754		2.2306	90.5594	72.4797
		2.62725	98.1861	33.4502		0.554288	-165.062	156.291		1.6012	32.7842	41.2667		1.36524	-113.876	116.286
		2.5299	-90.5033	125.048		0.857993	259.537	16.8109		0.468444	27.8473	79.4709		1.53761	-159.054	125.061
		1.19743	44.2775	18.9053		6.03764	289.919	55.8366		0.799451	-345.332	139.37		1.01325	-4.73074	176.304
		1.88422	-56.3339	117.931		0.737945	44.4808	16.4582		0.456045	276.612	17.4628		1.92659	-95.5308	162.487
		2.08476	109.033	47.4807		1.00431	132.761	39.1264		0.48494	270.126	12.3355		1.38746	-282.345	167.35
		1.0423	240.549	0.81245		0.77094	53.1099	67.1066		4.13337	-440.942	167.475		0.700132	-186.238	175.234
		0.781613	175.004	12.4931		0.820719	53.3804	39.4602		2.59665	-34.0183	178.391		1.65248	-353.148	177.607
		2.04433	97.9224	2.81989		2.5876	-40.8855	143.457		1.46775	-116.094	116.285		0.746316	-104.915	165.101
		1.33062	73.7285	7.07128		1.18081	383.543	23.3033		5.07148	-396.137	153.193		1.80346	98.4485	34.3002
		1.79736	139.417	12.3898		0.63787	32.1093	10.9956		1.73397	-224.999	135.793		1.32382	147.815	13.4291
		1.04248	162.215	37.8986		0.331141	-260.764	125.72		4.99828	-59.8402	145.42		0.840085	-427.641	177.022
		0.491508	228.812	9.58617		1.36915	98.8885	28.5237		1.56397	79.822	24.1761		1.83149	-158.668	168.977
		0.715592	253.367	17.5475		1.91564	-185.7	118.417		1.75889	276.227	35.8927		1.66084	-303.184	162.524
		1.84797	114.687	14.8084		1.80874	-165.116	172.691		1.9741	60.2464	76.2798		1.28944	-349.141	177.152
		2.13752	89.3647	3.44809		1.39589	244.006	60.9076		0.588101	-42.2289	110.402		1.70167	-482.88	160.099
		2.45808	155.534	5.04283		0.230792	464.749	22.862		0.269148	41.149	54.1783		0.39741	-181.068	120.613
		0.579705	1.16033	77.0399		1.17848	229.761	1.52434		1.91981	-163.718	114.054		0.97733	-226.237	122.44
		1.38288	-109.326	152.526		0.484052	105.568	15.041		2.77028	-427.636	159.913		0.791397	-158.586	137.124
		1.15981	18.3752	38.929		0.458799	349.028	29.1296		1.9912	-126.087	142.133		1.06056	44.6741	34.0232
		0.96933	350.679	31.7415		3.78652	386.519	14.4704		0.990464	165.656	56.6988		3.67989	323.21	8.5298
		1.85358	45.4167	68.4545		1.77623	487.491	10.5992		3.54433	330.236	12.3888		0.446226	168.481	39.8325
		0.533461	341.595	29.1877		1.08667	263.505	12.2234		1.48793	-394.947	166.919		1.28982	233.97	28.451
		2.83855	-117.245	154.467		0.683147	213.117	30.0751		1.4461	-135.417	143.891		1.38915	-55.4072	166.026
		1.66916	-464.327	176.226		0.744226	139.042	49.3919		1.44247	280.478	43.1108		0.800935	-238.637	149.522
		0.482133	321.877	23.5736		0.942862	172.028	34.4682		0.537425	337.776	32.2504		3.94532	282.61	12.4375
		1.37263	99.7418	21.0049		0.545108	123.132	44.6583		0.127213	-41.7089	97.5638		0.769574	-232.801	167.247
		0.626662	118.965	20.4937		0.253928	65.1395	52.3133		0.158994	262.583	28.7408		1.32208	-56.8001	121.693
		1.72517	154.304	8.54684		1.87953	149.703	12.8868		5.45053	457.364	14.1244		0.309802	142.019	21.9298
		0.339841	74.3103	4.41102		2.35456	-2.53046	101.857		1.64738	-318.806	176.341		3.14218	513.462	8.59301
		0.360058	153.113	3.67468		2.37059	-262.205	165.006		1.42305	-364.438	165.527		2.95137	-182.728	111.115
		0.628657	228.267	7.04422		0.78647	373.05	43.7304		2.38578	-194.264	146.837		0.733132	29.2031	85.8278
		0.899674	117.637	9.17485		0.351485	-309.239	131.517		1.73261	-160.443	145.997		0.608449	-124.587	119.859
		2.7988	145.428	31.4798		0.702497	15.588	57.62		0.589395	180.877	27.1649		0.389827	13.5487	72.4214
		2.5063	-130.918	179.306		0.805161	67.2859	65.8109		1.08061	226.462	37.1179		0.986376	-209.292	155.553
		0.894647	101.922	37.7106		0.452235	12.1906	87.8391		0.295823	141.019	14.9539		2.41174	-183.991	164.279
		1.18602	0.338156	89.8152		1.06838	-194.043	123.79		2.15506	163.369	26.1644		1.02838	155.086	24.5524
		1.08365	53.3785	55.1672		1.13535	-69.4934	139.692		2.4127	41.1624	75.0989		3.00366	51.3943	36.169
		1.32093	53.6083	16.3379		1.84107	76.7564	69.8852		0.480399	-292.591	172.179		0.710564	92.6125	41.0934
		0.562842	-54.4395	118.275		1.34927	306.786	32.6841		0.644139	-45.6122	104.895		5.49888	-180.016	130.341
		2.56901	-130.518	106.097		0.783325	73.9796	72.6353		1.00608	286.396	6.4714		1.58552	192.344	10.277
		1.43565	-87.1455	128.539		0.454879	-159.25	153.381		2.98318	-196.379	168.362		1.43311	213.655	40.0584
		2.04417	79.8462	9.43422		0.36343	-163.573	134.705		1.47447	-27.5017	113.355		1.17195	-30.3743	100.797
		1.92001	67.9284	16.1322		0.523326	-55.3246	160.134		1.99382	-189.186	175.875		2.01438	306.51	8.51691
		2.12377	48.5351	30.1091		0.440183	-137.772	159.952		0.478547	-437.718	168.185		2.75606	47.8012	28.2674
		1.01465	32.6417	65.0845		1.62518	57.1965	43.2513		0.979821	-267.452	145.545		1.74472	-115.933	140.739
		2.45182	-3.47752	110.713		1.03903	-237.888	132.764		1.73988	33.9626	77.7656		2.64263	193.464	10.9191
		1.76328	-43.5741	153.92		0.654572	-252.773	130.484		0.835564	128.156	42.0818		3.35102	-13.6115	93.5277
		1.12654	-1.83874	97.5274		0.386832	463.264	7.30761		3.14567	331.33	33.4898		2.6355	-13.7338	123.027
		1.07678	45.1335	30.5606		4.72528	109.374	69.2263		0.56738	-357.69	179.169		1.45199	-268.825	178.268
		1.56782	141.961	4.22005		2.92377	123.622	64.5258		1.2814	-321.772	176.677		2.01736	-199.049	159.258
		2.02245	127.879	21.3346		0.691546	-161.222	118.666		1.04748	81.4896	37.7716		3.28287	-276.034	157.784
		3.02146	30.5774	64.0217		0.392182	-64.6796	152.772		2.07136	39.8184	58.6031		1.36559	405.034	19.555
		2.03508	53.4563	47.5991		0.510717	-100.53	171.512		0.445215	232.38	52.036		1.72089	139.114	12.7929
		3.28227	-87.1611	158.887		0.241621	91.3566	77.1636		1.70984	321.067	29.1337		0.395534	133.305	65.6305
		2.20592	24.8364	53.2192		1.79482	-418.532	157.02		1.49836	-11.6858	92.8184		1.61894	73.6705	78.3686
		2.42918	29.4599	55.4129		1.75479	-309.14	146.164		4.04768	-172.837	137.661		0.103055	208.321	53.6705
		2.02516	76.2655	13.4339		3.61665	310.725	13.3546		6.39108	-419.09	166.884		0.751189	372.25	9.81291
		1.47231	5.3217	87.6836		4.40865	66.0107	41.0236		5.3784	-49.1296	117.83		0.749449	-182.791	177.413
		1.05856	92.9382	15.3958		2.07361	-94.5517	109.643		5.29369	-256.812	153.865		0.385099	-228.13	161.964
		1.11115	62.9849	56.5311		1.29179	-70.7142	151.026		2.98471	-16.9937	111.877		0.429854	-50.3259	133.183
		1.12523	-411.5	148.127		0.7704	-407.948	169.271		4.0177	4.25114	87.3658		3.9088	-158.694	164.834
		0.937058	125.621	9.12856		4.6816	136.255	64.3121		0.472971	140.651	51.5657		0.978812	-270.04	123.351
		2.9859	-21.6764	145.275		6.12692	194.782	32.1782		2.74206	272.369	5.71016		4.17027	5.7695	75.3333
		1.93686	-18.2513	143.263		0.304592	-288.714	150.192		0.218805	-135.001	167.825		0.378919	86.7255	59.3805
		2.25689	-3.98837	96.8237		1.18654	-368.102	165.692		0.922274	-372.956	157.262		0.436997	-133.113	122.633
		2.19122	31.8357	17.3809		1.10734	8.05841	87.2797		0.63601	-264.631	175.135		0.973863	-273.5	160.655
		1.33264	-11.8978	170.192		2.97199	194.454	57.4331		0.264218	45.4981	61.373		2.05119	-440.431	167.022
		0.77525	14.5499	50.3341		2.91169	51.0281	82.1518		2.50632	-14.4757	103.345		2.36694	152.566	4.84835
		1.44464	55.4624	47.1711		1.36217	-370.891	141.57		1.92344	59.1529	68.2476		1.80272	129.753	42.2119
		0.811211	8.21976	39.7081		0.4718	334.026	7.80081		3.22129	-3.34166	92.2722		1.36922	147.353	41.827
		1.47769	19.3398	42.0371		2.53388	-84.9719	145.617		4.27441	-192.922	173.762		1.23177	13.7423	85.9777
		2.02414	44.3468	6.57711		1.81794	-212.65	171.439		0.313541	244.883	11.9382		1.01712	129.999	8.33661
		2.15271	-7.36646	102.008		0.371771	234.072	6.55096		0.477696	25.3808	70.3998		1.94261	-11.8484	95.7781
		2.46303	28.3144	10.2129		0.599305	-116.356	140.17		1.10336	11.664	78.7009		1.22862	-363.733	145.21
		1.49996	22.3702	10.8314		0.225353	-21.4254	97.3021		1.41515	-11.8234	99.6502		0.899374	411.799	23.4595
		0.780385	82.1978	78.7862		2.724	34.9266	45.1893		1.51312	-50.4521	151.791		0.980462	77.8751	28.0371
		1.99906	-337.607	135.049		2.44364	-184.223	137.518		1.25294	-112.886	168.635		0.556372	-154.473	159.565
		2.11385	73.1842	28.1541		1.86709	465.739	13.8987		0.835859	-67.7373	179.054		0.900245	147.99	37.2759
		1.80489	187.54	11.2371		0.258272	-418.026	154.669		0.868774	-74.0929	135.302		1.77779	4.6121	55.0338
		2.73403	119.549	35.4819		0.556689	-426.287	145.168		2.46715	-276.789	174.798		0.320782	-242.39	166.19
		3.35619	168.995	1.76012		1.04469	-112.316	108.484		0.390038	-143.181	145.316		0.337576	45.6347	47.6424
		2.19551	36.7093	49.862		0.17146	-395.076	172.499		0.926411	-176.813	173.564		6.19654	494.066	3.14539
		2.07724	114.182	34.7714		2.78271	197.46	60.4651		2.52098	-60.4442	156.297		1.04101	-327.493	179.097
		2.64349	72.5526	52.7967		3.88934	243.008	27.8223		1.14535	-10.9603	96.3112		4.19469	328.91	7.84682
		2.8959	-93.3248	125.029		0.476487	-77.2276	132.407		1.17953	-163.191	173.263		4.40286	-211.973	170.241
		2.63598	79.9795	31.0965		1.53944	-482.653	172.906		0.864669	-100.755	175.046		1.50438	140.794	51.3658
		2.64674	116.84	57.4012		0.341784	129.064	39.8116		4.19412	-32.1455	150.266		1.58503	109.252	33.3629
		1.85332	84.0872	75.0369		1.27798	217.578	60.3659		0.999057	457.278	4.11349		1.92759	-54.8431	138.219
		1.55069	58.5659	78.3344		0.815153	-145.57	178.263		0.66039	-242.129	176.682		3.35621	130.372	37.3764
		0.979072	-63.375	105.315		1.08017	-234.966	153.476		3.88085	-93.0796	165.699		3.2671	10.8957	85.574
		1.33833	-95.08	155.826		0.574945	291.769	18.1333		0.553361	-281.609	150.632		1.42521	-348.859	159.477
		0.924374	-115.24	154.963		1.4618	55.6817	58.6955		0.73999	76.5697	67.0243		0.604707	440.506	16.6606
		0.670171	80.0222	23.9252		0.607981	59.2811	72.5467		2.98711	-48.9981	97.1964		2.94309	-329.53	153.31
		1.21563	-13.1906	100.027		0.626943	174.706	53.5648		6.01843	193.419	64.9225		1.54427	-157.843	115.277
		0.593772	-51.0027	122.894		0.953886	-97.6541	103.797		6.07294	260.244	55.8843		2.93799	308.367	47.696
		0.51991	63.5388	32.0327		0.789321	262.277	17.8301		0.857655	131.077	3.77214		1.33052	-49.3791	101.304
		2.08041	-238.405	178.531		0.283308	170.424	18.5857		1.61597	81.2658	67.2982		0.788482	122.719	49.846
		2.24167	-167.642	118.775		0.5192	-353.973	158.251		3.76797	-148.441	125.015		0.718088	139.989	3.84634
		1.93945	104.325	55.4605		1.24663	-456.526	178.401		0.261728	327.681	1.14772		0.810334	96.8786	45.4226
		2.12319	-57.059	110.494		0.821892	326.445	9.04167		1.90471	-378.821	137.524		1.38351	6.84256	82.5992
		2.19376	-81.9452	105.799		0.176298	190.218	25.7559		3.08465	-99.2355	166.918		0.0694947	-266.441	145.341
		1.22403	93.6011	75.7481		0.246306	-202.297	137.768		2.09973	186.522	49.569		1.38729	18.9388	87.3905
		1.99933	-250.11	142.403		0.774727	-165.745	112.002		0.399612	176.079	6.78716		0.862993	-35.712	132.057
		1.16361	-418.76	165.537		0.274591	-48.1513	140.289		1.72475	120.248	42.3849		0.411734	110.725	32.8212
		0.620163	-262.709	170.368		2.16248	-43.1567	95.0145		4.66728	280.862	13.3709		2.02753	188.401	58.526
		2.61696	74.5765	8.85588		0.53165	66.6132	19.9631		1.91904	-379.015	148.282		5.17279	-377.598	143.05
		2.0075	81.4799	1.35843		0.69368	-102.061	141.95		0.774148	410.39	27.3786		1.17073	331.45	35.9474
		2.52937	30.786	32.9211		0.83957	272.672	12.8031		0.865358	121.345	4.32969		0.96767	-160.306	118.284
		2.13731	-10.6015	100.346		0.843231	90.0288	18.7703		4.8378	91.3745	61.6542		1.87282	176.617	51.0277
		1.39155	4.32204	86.7953		0.308386	60.9963	61.5514		0.574136	-339.744	144.013		1.4708	83.0074	13.3056
		0.12239	37.6737	60.8127		3.48059	42.8352	73.8183		1.64805	279.66	41.3502		1.07256	-61.3527	151.498
		2.60317	17.9195	73.0371		3.87681	76.0742	71.3835		3.40737	223.406	23.5624		0.861626	324.03	45.5798
		1.73578	80.757	31.2757		0.995511	21.2281	85.3296		5.9828	406.082	4.86569		4.59959	321.469	33.6239
		1.86844	41.0232	51.1719		1.73498	108.08	53.4417		0.540977	-50.3041	97.0713		1.91929	-165.169	137.341
		1.85125	65.9459	13.7173		0.953828	-83.7024	174.061		2.48942	-309.702	149.643		1.81563	-138.382	169.702
		2.67837	171.895	9.49194		0.106636	127.724	59.5097		1.59603	9.94209	84.3399		0.923173	2.39573	88.0073
		1.4164	-24.964	149.913		0.483	112.825	54.0661		0.352951	-65.942	115.974		1.21227	213.518	18.8249
		1.80758	-4.06146	144.901		0.106725	109.575	52.9783		1.67284	-234.351	159.153		3.18453	173.381	47.0568
		1.68536	-18.62	120.475		0.281616	169.857	44.3651		2.83734	-412.895	168.075		0.988682	-139.725	114.932
		1.17496	-43.7857	175.543		0.331726	31.3716	78.3125		0.779835	435.643	23.0705		1.02687	408.608	27.5666
		0.922382	22.8075	72.8761		0.296756	118.273	25.0615		1.83847	398.618	31.0873		3.1833	143.173	3.36218
		0.606115	-36.8849	144.938		0.443903	-36.9322	104.748		5.35997	-323.62	135.626		5.69731	-59.8241	109.943
		2.64944	39.4994	25.4665		0.413076	-95.9938	143.242		1.58745	154.16	41.3437		1.05136	154.165	19.1684
		2.02642	14.9836	76.9471		0.3658	-45.2418	115.131		0.512543	275.829	23.686		0.706251	-274.28	164.982
		0.717783	204.588	6.74024		0.193197	-136.513	162.252		0.843809	243.115	17.0106		1.57717	-250.56	136.82
		0.217135	152.372	9.56955		0.266732	-108.218	173.24		2.59324	-119.847	147.445		1.24833	-442.715	173.514
		0.922035	202.626	5.79059		0.123007	-48.3813	125.648		2.06078	139.97	22.3791		2.83934	-318.235	143.934
		0.808143	140.496	26.9479		0.109447	-294.791	162.211		5.95145	244.815	21.679		2.90911	-170.177	172.589
		1.50524	37.821	47.8474		2.1524	114.883	45.6934		1.79387	-95.999	175.011		1.33843	-458.791	172.04
		1.31321	1.81959	69.8445		1.35547	147.432	15.1556		0.27094	54.6963	83.7937		0.611516	-380.572	177.464
		0.182092	24.6347	20.7514		6.41396	-138.776	135.823		1.61939	248.293	61.0913		2.00746	-348.459	172.554
		0.774436	84.5077	35.871		1.51912	-172.931	124.267		0.626024	285.593	32.3679		0.864343	55.5006	64.3795
		1.36852	107.506	37.8411		0.93057	-402.133	171.794		1.79298	113.348	46.0776		0.280128	-108.404	137.684
		2.53305	387.554	0.985534		0.745546	236.644	43.7951		0.413497	368.195	36.7629		0.48525	-114.74	152.301
		2.43179	129.805	24.993		0.433509	265.731	35.1278		6.13471	29.0831	51.3654		2.81208	46.9643	31.7801
		0.745368	129.765	30.0353		5.41627	109.658	74.5148		1.31337	-225.291	150.066		1.25997	-241.543	124.406
		1.29831	205.479	4.12295		0.350914	222.923	36.6576		0.513984	41.4211	16.5885		2.20302	105.734	22.334
		1.26684	194.019	10.4496		0.406797	120.88	58.0676		0.965204	-0.261421	90.3649		2.62731	292.333	15.1665
		1.64068	194.991	19.289		0.321305	390.495	0.261973		2.28434	466.863	12.6463		2.43168	359.902	8.74079
		1.67812	94.5589	79.1683		0.767752	-19.4157	98.0632		2.8148	21.9892	49.4013		4.67997	122.729	13.2127
		1.0184	107.329	16.356		1.45171	-146.632	134.586		2.86787	-502.252	166.596		1.12373	-112.794	162.702
		0.900703	73.5961	50.5161		1.12126	-51.6004	99.0582		0.619507	197.852	15.5977		2.08782	-334.03	155.906
		0.744862	11.1393	85.4634		0.121481	51.0326	77.336		0.891733	-20.4659	105.737		2.48079	-494.669	173.786
		0.518373	101.326	22.2835		0.122649	-360.273	137.699		0.498156	-55.597	106.414		1.49472	-10.0654	110.844
		0.549743	-63.2209	111.733		4.66207	-230.547	124.323		3.42803	-133.93	143.428		1.4524	251.533	36.8692
		0.649854	-74.3232	117.604		0.631051	351.892	21.3719		0.357932	-152.101	110.638		0.164816	-111.209	136.7
		1.19959	74.1681	35.9226		5.03865	146.344	55.27		0.955588	399.495	19.9379		6.1915	222.949	46.1537
		0.674365	28.513	63.1559		2.05422	-74.2762	111.471		4.66584	413.127	14.5495		1.0407	-233.553	171.236
		1.32796	-17.9859	110.29		0.642491	-33.0786	94.534		2.08284	479.217	17.0304		1.97149	49.0707	28.7946
		0.881578	-28.3241	114.326		1.08297	238.991	61.1755		0.626236	-130.507	163.07		0.879004	-26.6716	113.944
		1.6313	39.1318	54.9097		0.57808	295.511	54.3721		0.366149	-51.2865	139.103		2.773	448.241	12.1446
		2.44338	151.85	20.6684		0.882283	-195.586	118.762		1.24158	56.46	21.7743		1.85332	-73.8007	101.851
		1.62284	118.07	15.7272		0.783204	46.2382	82.3406		2.34567	143.119	0.802563		1.92728	-215.67	117.217
		1.95422	86.7038	27.4011		0.744454	341.828	14.3986		2.51801	-15.2608	158.531		1.95209	365.072	4.88163
		1.44537	56.2081	42.2076		0.507413	381.236	33.3889		0.791222	-108.079	175.432		1.72066	309.129	31.1088
		1.08103	104.749	27.4449		0.532529	376.185	0.605005		0.241061	-139.26	159.189		0.749201	481.02	2.21978
		3.20769	165.144	13.8952		0.432997	382.9	14.9082		2.41145	77.6958	16.7268		2.10545	-337.229	132.242
		2.3871	133.13	9.21502		2.08863	144.033	64.2986		1.41584	-21.464	161.751		1.72095	20.9204	12.1468
		2.48382	180.074	9.15963		2.84698	-461.828	175.165		1.60228	140.911	21.4675		4.02873	-141.353	164.525
		1.87761	150.203	23.8946		2.47688	438.046	24.8958		3.53073	19.3965	57.6537		2.42373	-313.384	160.726
		2.31612	64.0165	49.9587		1.85862	164.829	35.4356		0.351315	-369.764	178.723		6.23522	-54.8988	112.699
		1.08188	-36.9884	111.284		0.343223	-101.094	108.309		1.89057	-228.314	125.239		4.18409	400.616	11.3866
		1.71446	134.016	26.5507		3.46654	72.7284	80.976		1.80878	-480.854	162.079		0.6723	226.578	12.6675
		2.74227	-12.1398	93.3715		1.00044	21.581	87.6165		0.925511	24.2765	73.7296		5.13509	300.587	21.5398
		3.7981	-19.9577	96.095		1.31394	-87.3631	100.266		1.16054	27.6129	86.2921		1.2587	-56.1914	178.286
		1.58703	-49.9584	102.739		0.44624	-92.5095	163.667		3.76989	113.29	74.7874		1.53997	19.0677	85.8124
		1.83093	-10.3914	97.4487		1.65083	-39.1824	107.004		1.12877	22.6882	71.2592		5.43265	-493.825	170.436
		1.05808	-9.4079	99.1358		2.70363	99.6103	52.2195		6.39401	199.172	52.3203		2.06128	331.31	43.113
		1.19715	72.0355	42.1001		2.60075	-58.6671	108.819		2.23642	-332.504	165.252		0.453101	-179.172	155.67
		2.32998	50.3224	1.93758		2.3797	-88.1137	161.417		0.379369	-36.0489	150.691		0.507942	-32.4974	103.496
		2.93942	-52.5897	150.277		1.43566	-222.928	155.666		0.1886	-33.5617	108.051		0.344891	337.311	2.48688
		2.87781	-46.2824	149.589		4.27381	391.317	12.9432		0.673815	147.807	71.9182		1.37848	304.251	11.9085
		1.91076	-30.9105	140.582		2.35042	30.4616	77.1262		4.14056	37.8002	22.3413		0.596852	-35.8159	116.384
		2.16912	64.8163	12.3232		0.305774	-75.7074	172.503		0.991331	155.763	58.1092		1.26076	1.58815	89.2455
		1.92638	131.029	14.5675		0.396771	-79.6048	128.882		2.0758	282.598	10.7278		0.454799	-417.243	162.889
		2.42061	6.21226	67.6209		1.94793	322.607	8.79878		2.73035	59.9188	81.358		1.22196	-115.445	171.112
		1.15333	295.29	6.5042		1.56149	143.821	49.0546		2.66735	-376.863	161.271		6.32683	234.57	0.0704405
		0.221015	219.791	5.74354		3.44534	-107.436	107.647		0.657425	-236.05	151.524		3.98659	-279.439	133.145
		2.0078	164.993	26.6732		0.664241	-373.279	144.416		0.639723	-200.33	175.631		2.61795	-55.4316	162.871
		2.54988	106.008	39.4137		1.7177	310.322	51.1961		0.568914	-37.9536	113.673		1.16243	-140.597	137.717
		2.92932	-26.1859	115.238		2.51548	-254.722	127.249		3.9147	-73.5389	103.199		1.51677	203.855	25.9184
		3.1441	156.734	1.29053		0.847247	-231.313	141.567		1.24854	502.751	11.0597		0.455107	108.655	15.0769
		2.67858	27.771	17.0176		0.415112	-419.579	157.126		0.83718	-55.6236	117.368		0.607907	12.4543	56.4722
		0.527613	-137.567	167.287		0.433283	138.339	12.3099		3.77483	-13.325	101.598		2.60422	5.58232	73.2397
		0.995717	-68.0144	147.823		0.755747	229.82	24.11		3.91692	-172.305	148.163		1.50022	143.919	31.4286
		2.23059	12.7429	82.0388		1.72832	63.7933	68.2584		2.75611	418.354	23.7191		0.542477	-456.278	175.263
		1.55554	-5.52294	93.228		1.25041	62.1866	74.4368		0.152556	-94.9687	131.26		0.48809	53.9572	69.0196
		0.323816	-123.907	171.367		2.47273	83.0152	38.7849		3.61794	-65.5872	109.831		1.03921	-217.538	148.223
		2.12702	-130.435	150.648		5.95624	-131.601	135.846		2.91866	-213.254	169.702		0.833817	-6.65766	125.986
		2.20468	-106.402	133.541		0.909502	408.127	0.392223		0.654552	264.447	7.7164		1.50317	-231.708	142.363
		1.18275	13.3349	58.4089		1.90727	-38.5955	98.5232		5.20412	156.607	66.423		1.11892	-216.168	139.156
		1.05115	-11.2962	174.23		0.667211	336.194	34.2761		0.447221	-286.721	131.614		0.734202	-57.4856	121.911
		1.38208	31.7578	65.3285		0.920457	-307.646	152.09		1.72461	-30.943	138.228		2.63079	-314.92	145.838
		1.00298	33.1938	48.8403		3.52511	5.13838	88.2593		2.28561	238.809	35.9559		1.36239	180.314	11.8736
		0.624029	23.1737	10.5046		0.637164	-73.2836	100.469		0.267727	-91.2206	113.915		2.57553	116.906	32.9692
		0.604533	89.9828	23.3962		0.462644	-390.659	149.535		0.328684	-248.936	136.077		1.27995	-137.012	161.194
		1.42442	67.3426	44.978		4.35987	248.359	14.3148		6.16424	45.6983	78.6249		0.969346	-54.4879	102.284
		0.582788	74.0164	38.5136		0.160322	-265.408	164.946		3.62944	281.684	13.8043		0.368734	-291.578	146.984
		0.787123	130.736	20.5876		0.16596	395.174	34.8363		1.84512	-32.7849	97.2351		0.48573	-385.565	155.252
		1.0233	136.507	1.03655		0.653617	-180.647	154.214		1.71472	-297.465	152.996		1.0964	258.132	17.5791
		1.67371	295.89	1.8636		2.31279	-266.198	177.788		0.166426	-34.4004	100.73		1.30505	299.037	4.10251
		1.97537	374.46	15.333		1.4844	148.384	14.7623		1.39599	140.426	27.729		1.12529	248.362	15.1587
		1.61132	295.617	21.3935		1.1773	-201.857	177.504		0.288202	340.457	16.2793		1.95999	-117.692	140.631
		0.821109	82.9229	57.7638		0.536663	-175.858	125.881		6.08466	59.4169	78.1921		0.727907	-250.942	134.475
		1.00249	-117.816	115.346		0.161983	201.392	13.7118		0.17176	-208.528	149.809		2.76308	16.6237	65.2512
		1.4386	-139.607	114.579		0.831506	-463.13	178.001		0.861338	-224.171	144.792		1.63077	-186.715	150.94
		1.51762	175.361	11.5123		1.29169	485.935	6.83786		5.98468	-290.284	137.187		1.80715	-422.083	159.813
		2.37359	-212.471	131.097		0.913727	191.112	15.6781		0.655555	-277.542	176.743		1.35292	48.4106	5.12055
		2.02233	-320.244	138.133		2.29719	131.499	15.6825		1.18282	-233.093	153.485		4.55699	-55.0221	102.322
		1.6343	73.2905	7.06167		0.719823	-118.462	175.592		0.522371	271.887	10.9655		1.2327	409.615	22.8276
		1.35118	47.8104	53.6474		2.34512	-75.811	165.95		1.96304	281.131	19.5169		1.05154	165.669	37.7668
		3.09061	133.458	21.9235		0.798336	-346.711	174.98		1.95377	-168.463	158.734		0.911816	37.1882	71.5091
		1.01752	211.252	23.2595		0.460458	-82.9212	165.395		0.938119	-227.218	141.123		0.0526612	-13.7423	124.894
		0.709267	104.044	42.6206		0.372141	280.226	17.1586		1.84544	212.814	13.1634		0.210411	125.996	60.2648
		0.625039	116.703	31.9299		1.7695	-227.509	136.219		0.570422	115.824	6.39222		0.684736	28.7032	63.6501
		0.175313	100.849	11.459		0.835082	-333.583	167.216		0.481464	12.4903	74.2578		1.31313	5.04783	83.8438
		0.323258	113.368	20.4262		0.65015	158.576	56.7459		2.91038	-58.9231	153.265		1.59901	298.189	7.32618
		0.387313	19.2955	86.4729		1.22483	354.739	33.7402		2.28799	-61.5749	116.177		0.507514	114.458	12.2871
		2.00165	249.143	3.8618		1.13351	271.052	40.5796		0.399044	415.518	11.3206		1.0708	-1.37772	91.392
		1.76829	76.3767	51.5919		4.64981	169.575	50.2924		0.656987	222.568	61.5599		0.856825	80.856	72.2278
		2.57165	152.663	9.40806		0.88065	53.1661	44.6059		0.962307	290.681	38.7147		3.68577	-5.99154	90.9787
		2.51135	138.662	12.468		5.43904	-4.66378	95.5668		0.92643	350.252	25.31		4.20854	395.602	1.24388
		1.2885	254.038	34.0597		5.96777	149.643	24.055		2.12518	-50.3306	104.115		1.04422	8.43321	88.4723
		1.06621	132.664	58.6819		0.307301	26.6613	86.8238		1.56055	322.064	16.1435		1.71608	-12.112	94.0239
		0.824092	71.3725	64.2257		0.617052	-155.328	109.723		0.111689	9.55698	88.8037		0.235513	293.358	0.225818
		0.476887	-56.9476	109.539		4.26789	448.354	6.76202		3.24442	287.577	5.60923		2.56148	-132.157	105.809
		0.904979	-34.7431	106.516		0.645511	-42.0026	115.397		1.42113	-429.537	171.01		1.75535	-31.1484	101.83
		0.205194	-182.821	146.793		0.484155	216.987	13.3099		0.945232	-2.90803	90.767		3.08927	-162.092	115.038
		2.27082	-27.6962	107.997		1.85317	204.257	23.0378		6.19532	-140.745	160.336		0.885312	-351.554	141.294
		1.19393	49.7826	34.9087		2.46357	149.12	31.5713		0.407255	209.438	33.547		0.511644	-87.3629	111.061
		0.818699	196.679	36.5216		1.06974	22.5048	52.6329		0.594123	120.84	65.9327		1.09653	-99.6802	110.725
		1.01437	115.877	48.7874		0.528144	-338.351	178.584		5.70597	-227.132	148.415		1.58813	-22.827	100.274
		0.708729	27.2214	79.7		1.03183	-286.336	166.541		0.66298	56.311	78.254		2.39175	93.5083	56.4628
		2.15963	-193.716	175.121		0.988895	-307.535	156.921		5.53089	-336.431	166.157		3.0413	-87.0816	128.036
		1.81281	8.83938	82.5033		1.43372	-146.726	171.36		6.06727	-274.97	136.717		1.00613	239.651	51.5946
		1.82144	95.7749	41.1596		2.31324	300.783	33.8175		0.301462	424.843	34.9208		0.481193	290.127	5.70219
		3.1475	73.4522	11.0189		1.11285	152.271	40.0199		4.10146	-334.761	172.163		1.59421	59.3392	11.2921
		1.52231	83.6527	29.2522		0.583847	-375.555	165.829		0.897781	289.629	20.7508		1.08018	22.925	80.2621
		0.584275	116.13	3.7125		1.38084	-66.6326	108.611		0.410974	164.929	60.919		1.30444	-243.948	172.294
		1.15304	26.5559	13.6155		1.77481	133.672	6.12903		2.81283	-20.6709	93.8215		0.697067	-123.149	115.576
		1.92981	-2.79512	95.4157		0.533692	70.9533	46.7689		2.79841	-123.975	128.241		0.557099	-112.723	103.66
		2.01613	18.2646	45.9185		0.686231	31.3882	72.0405		0.204643	-224.067	153.412		5.00247	-28.4004	98.6875
		0.814359	8.64488	76.0622		0.434768	15.6229	75.5896		0.528875	-94.5822	121.244		6.45935	-47.4093	126.409
		1.45502	-0.752395	91.2055		0.278339	28.0488	22.286		2.08169	-42.0971	110.386		0.151326	177.943	58.2704
		1.68363	35.1228	6.26919		0.355024	43.3686	42.5255		0.356873	-153.731	121.547		0.284845	-256.343	149.245
		2.28301	-17.8892	107.01		0.106046	38.7614	63.4353		3.25483	426.051	4.23502		2.80334	469.261	0.29635
		1.34596	-19.8868	103.297		1.03575	183.231	39.9333		1.95872	41.701	47.3317		0.874511	-13.5643	94.6434
		2.19785	143.254	10.0462		0.454786	105.284	50.9938		1.6674	375.416	21.3568		0.541997	75.9617	15.8545
		2.4349	-156.862	147.434		2.18157	-61.9475	117.677		0.516042	-464.884	170.507		1.24219	65.0207	26.1322
		2.57827	-115.877	118.922		0.414798	351.763	28.8391		1.08497	325.32	47.6817		3.68623	51.7732	54.9153
		2.15821	16.9162	78.3592		2.25085	507.759	7.08677		1.40489	396.837	36.3514		0.596338	356.602	19.45
		3.34905	388.063	7.7519		1.31085	-103.622	160.566		1.52301	165.749	33.1726		0.682017	87.703	35.5679
		2.91982	251.084	7.97153		0.467668	-159.955	161.086		4.34047	-148.683	171.011		2.64375	82.926	54.9648
		2.08415	163.569	12.441		0.578585	-17.3693	155.734		0.420152	145.573	13.2787		1.30563	493.228	0.978704
		1.61718	171.284	9.65486		0.0667649	-13.1961	130.261		4.86265	31.9277	61.548		1.87837	168.574	25.2398
		0.764372	104.986	4.92862		0.35468	227.22	26.3178		2.59086	-41.8701	139.239		0.799563	-180.315	119.534
		0.286458	80.358	12.7063		1.76738	365.858	19.3197		0.85107	-230.248	127.698		1.51814	213.246	53.2441
		1.2981	58.4761	29.7846		0.714084	336.197	0.835423		2.27212	-30.9418	102.949		0.261232	-490.148	161.877
		1.53821	41.9211	23.3099		0.869087	229.879	15.1646		1.00624	-277.508	159.662		0.498266	390.434	7.47138
		0.771661	61.3692	2.00359		1.6378	245.206	14.1634		1.62975	2.57901	81.4992		1.87454	230.903	16.7382
		0.62786	52.5779	33.666		1.0834	118.146	16.805		1.04011	-17.0161	101.945		2.16305	-162.075	140.879
		1.02497	59.5789	27.7829		0.765462	197.162	6.18617		2.04778	-114.595	159.546		1.31133	207.242	53.9694
		0.289421	64.1022	42.2346		1.91316	-393.54	171.949		1.80521	-213.79	162.932		0.883096	318.129	40.0218
		0.293048	84.8002	29.6253		0.728489	429.167	9.71786		0.320379	-167.679	141.855		0.499812	-82.5503	144.142
		1.33468	131.658	1.20307		0.170328	340.498	20.8436		1.83157	-305.893	174.972		4.30943	-102.972	176.961
		2.7843	118.14	11.2781		0.246197	-54.5446	172.606		1.64329	75.3435	1.62376		2.05399	-279.829	131.142
		2.82281	86.1986	9.23543		0.749594	486.598	14.6011		1.34719	365.285	10.0109		2.88693	16.4563	85.8052
		2.11315	159.404	1.30138		0.870393	-164.655	129.358		0.652682	-101.424	161.8		1.15308	82.7268	60.5964
		2.22512	163.018	5.36599		3.90007	172.859	9.83442		0.778346	81.7045	73.8766		0.171556	414.944	17.8306
		1.08442	134.301	23.5166		0.965549	214.427	0.295888		0.486052	183.354	46.7802		2.04035	112.41	22.5772
		3.19254	124.642	18.6144		0.701478	160.71	11.0063		0.312028	-57.0408	107.46		1.06879	77.1528	48.2589
		1.42011	79.8082	24.3848		0.315255	126.021	28.9619		1.26592	166.141	65.6362		1.89919	108.522	16.4135
		1.2587	108.965	17.9298		0.489428	160.543	1.4607		1.37069	134.027	59.5168		0.696238	-167.173	153.365
		1.25729	125.285	26.5036		1.5008	300.625	15.5362		2.01966	-111.914	150.881		3.42799	-40.9637	121.573
		1.13885	74.8838	38.2879		2.41921	275.293	38.7622		1.68084	-166.819	168.897		4.55816	-447.792	163.205
		1.16377	39.6264	41.036		2.59848	-485.892	174.211		0.953592	-410.947	164.49		0.209777	-188.312	164.731
		1.60163	-41.9858	127.202		4.98079	-257.059	125.277		6.43636	-271.311	172.935		1.73452	-183.267	171.781
		1.68145	74.0101	45.0134		0.746494	-115.533	144.1		0.247382	136.9	66.1275		0.414644	-235.456	132.236
		0.6987	90.576	35.7418		0.348056	-17.5143	92.4406		1.01374	106.065	59.9834		0.436313	130.38	37.4666
		1.22997	135.64	23.9837		0.999801	-116.555	147.811		2.24175	-120.279	136.708		3.91129	150.317	34.7486
		1.25203	22.6588	75.097		0.500351	-27.2968	93.389		1.5133	169.353	32.2911		3.36026	169.646	8.6141
		1.28913	90.8545	28.8629		0.756719	-363.585	168.501		2.04476	-13.5688	149.968		3.04849	31.7347	45.2839
		1.96023	107.48	37.569		0.855036	202.768	64.6537		1.92942	115.239	7.27158		0.493187	2.58852	89.2318
		2.09273	79.7631	43.2408		2.52528	364.38	38.7003		1.60833	-165.186	159.982		2.46155	-52.9364	116.853
		2.10745	-26.1974	93.2452		1.56855	-25.599	93.7766		1.11411	-93.4131	138.911		0.954944	60.1512	70.3902
		5.79275	337.915	8.27989		0.207364	-101.54	160.552		0.688422	357.485	7.59379		1.22376	137.117	21.9368
		0.803571	-34.8907	94.3925		0.817188	-85.9604	107.214		1.32038	247.307	11.7992		1.26937	1.77326	83.5868
		2.32535	-41.527	96.5595		0.7647	-273.59	150.212		0.228266	287.204	0.482999		0.699004	54.9466	21.8368
		2.31379	114.508	10.5109		1.5574	-208.608	176.035		1.57756	282.141	2.88545		2.92392	379.142	7.76029
		2.59115	123.182	6.18749		0.743178	48.1736	52.0686		5.71161	182.11	4.24111		0.088198	-304.026	168.566
		3.01118	90.2396	8.36932		4.36522	23.7509	79.4842		1.58579	57.5456	9.41508		0.95529	130.087	60.2597
		2.11746	54.238	17.3022		4.64304	275.45	14.4819		0.652891	-149.052	124.873		2.24154	20.0507	81.5534
		0.902558	74.6743	5.24174		1.6266	-82.5717	106.592		0.342392	248.049	55.4323		4.99005	-153.166	162.065
		1.69857	83.9739	11.7366		0.640393	1.81136	88.6821		2.63802	-50.4013	143.253		5.31938	133.5	62.9023
		2.74717	97.6577	16.7645		0.651597	80.5165	64.5906		1.92594	-1.46413	90.3055		0.603961	95.5739	35.6167
		2.57932	140.614	8.13375		0.858027	-208.193	175.009		0.6769	12.0243	87.1129		1.51481	-64.7395	107.556
		1.35312	83.5543	22.1304		1.40709	205.493	28.1074		3.49396	292.694	33.9134		1.07808	-117.68	166.666
		2.44985	109.334	24.2452		1.09594	-3.46047	90.5192		1.21525	28.04	67.9469		0.816207	-47.7955	133.368
		1.41131	86.7142	28.9961		2.27704	242.762	42.2414		2.82528	48.8248	22.6455		0.32127	-30.3807	152.038
		1.9728	115.497	24.4184		1.37049	83.1992	36.2776		1.93852	220.181	18.0725		0.519951	-18.994	178.982
		3.15917	121.167	31.6082		0.643332	-358.341	165.522		0.454241	90.7317	49.447		0.596113	-66.6258	171.335
		2.49591	131.824	26.4508		0.974153	167.111	15.5937		0.352	2.27894	89.1492		1.9277	-47.0813	150.783
		2.51191	139.992	18.474		0.834256	224.758	13.3675		0.907644	-95.0354	160.167		0.342529	-399.183	169.736
		1.49403	77.3875	30.1892		1.50401	292.195	8.30591		1.01319	19.6624	65.2633		3.4126	461.916	23.6364
		0.456495	141.403	22.0251		1.5123	217.99	0.568601		1.35047	-84.1647	122.401		1.08459	378.819	21.972
		0.774986	199.12	7.3086		1.44352	57.2014	22.7209		0.837527	-72.0657	178.834		2.63103	15.6025	86.4783
		2.42372	244.717	14.7229		1.40529	149.352	8.13211		2.42556	-175.238	150.366		3.47736	69.4198	68.6816
		0.742157	106.637	28.9817		0.421964	283.748	14.176		2.85171	-228.575	160.106		1.51574	-41.2958	114.407
		0.881225	161.856	5.50245		0.479768	103.869	47.0272		1.20883	20.0805	69.7053		1.54507	78.5187	43.4464
		1.77375	128.904	15.0805		1.21189	271.938	3.15272		3.31306	-86.6191	168.118		0.636931	-61.8656	146.463
		2.36327	-85.7367	159.698		5.84798	232.936	42.9275		0.366918	-424.757	156.481		0.263686	15.1766	51.1029
		1.53079	75.0096	3.43373		3.9955	-266.572	161.935		1.33444	-257.837	135.969		0.961397	34.4196	44.4496
		0.967363	84.3653	12.8235		2.15419	-493.039	174.627		3.56836	-16.945	94.3344		0.536035	89.6883	39.5255
		0.970925	123.994	37.4243		0.808812	433.521	3.42102		0.921553	468.472	1.87832		0.229903	-100.896	150.405
		2.90705	399.549	3.59536		0.255132	-101.158	138.756		0.794877	175.838	46.2249		0.798211	-117.44	157.084
		0.94366	218.469	6.21237		0.712637	-13.7007	109.064		1.03085	-180.74	149.923		0.662153	-155.71	150.09
		1.59066	284.749	7.58683		1.1273	101.371	5.93131		0.797539	31.0588	58.3117		0.886082	-172.001	160.301
		1.93528	293.518	1.47412		0.959291	135.767	5.08729		0.961499	-82.7671	123.763		0.66792	-250.251	169.211
		2.81767	271.304	7.75939		1.32744	49.5361	19.7284		1.3544	-154.434	121.047		0.469144	-416.277	177.361
		0.819601	190.664	5.74821		1.23612	191.271	11.8911		1.04088	0.81038	89.6858		1.27814	-89.387	170.514
		0.885328	203.939	20.0235		1.53467	155.198	12.3351		1.96068	102.702	54.3609		0.217892	-58.6597	176.825
		0.475533	158.152	17.8088		0.624512	160.733	15.752		1.59574	369.113	1.4794		0.80233	-44.0109	96.4296
		1.18024	163.648	1.9266		0.6022	-0.43592	90.6182		1.10898	210.473	10.0737		1.13433	158.572	28.7843
		0.468722	259.037	22.107		0.917684	-46.4655	163.841		0.482371	19.2972	85.8723		0.459973	87.5745	18.3507
		0.474978	282.564	5.39419		5.20538	-213.696	154.146		0.937286	-138.501	174.64		0.42512	-180.474	148.613
		1.06012	293.427	3.87854		0.698009	-294.208	150.929		2.33164	-123.219	149.267		0.677371	-204.275	148.026
		0.26233	218.314	22.3384		1.88604	-51.275	178.525		1.66628	-336.398	176.797		0.968499	-170.02	139.19
		0.0996169	194.727	42.1671		1.16969	178.767	18.9006		0.829355	-354.347	163.924		0.20368	-202.622	134.764
		1.10589	225.438	26.0177		0.556595	122.552	69.8753		0.751371	-65.139	129.491		0.347287	-160.558	130.997
		1.63437	225.538	1.23092		3.06326	164.064	62.36		1.31533	-55.981	161.221		0.789534	-26.1701	103.415
		1.61371	232.443	13.4793		0.966183	-6.54737	95.6991		0.935462	147.388	6.8579		0.441937	-111.738	131.67
		1.48475	243.909	9.39436		1.49629	-246.574	174.888		0.60738	243.196	23.6812		0.246302	-141.815	149.428
		0.95411	219.827	10.5676		0.86842	32.8503	48.4548		1.17418	273.813	18.8665		0.217645	-497.811	179.303
		0.126923	215.003	36.051		0.309167	-11.435	118.524		0.27578	-158.622	123.212		0.33631	-129.123	175.068
		0.215014	227.488	1.39061		0.909667	-270.595	151.319		2.99101	367.285	14.539		0.291453	-153.877	156.545
		0.171997	173.32	32.8578		0.986237	183.08	6.28742		2.57764	132.693	71.0155		0.665408	-106.03	129.543
		2.30391	156.464	21.0087		0.846132	15.6104	53.6013		0.991633	-34.555	95.3832		0.287152	-62.0476	108.799
		1.28903	8.03852	8.64152		0.589313	117.603	4.66971		1.12276	367.008	34.1005		0.0467124	-170.378	145.843
		1.78499	8.84153	76.4786		1.12	-2.48171	110.129		1.74418	85.3095	50.3972		0.222007	-152.551	148.088
		1.39324	-126.288	155.344		0.892031	71.2238	20.8117		1.8033	192.705	33.1016		0.917172	-285.78	176.622
		2.98949	10.7528	66.6839		0.5905	181.545	20.6755		2.29538	137.69	53.9933		0.166361	-343.895	161.257
		1.13824	-4.14635	96.4029		0.223086	114.031	48.7555		0.680862	114.254	70.4727		0.285961	-326.479	132.504
		2.96442	52.7	13.0875		0.815295	80.4741	25.4138		0.788128	-106.806	104.489		0.357574	-322.76	173.567
		1.9417	12.8309	75.2362		0.291519	76.5659	16.0915		4.7278	189.067	60.7709		0.830911	431.04	11.662
		1.75347	59.1857	34.4259		0.236444	-159.368	156.085		1.35842	205.114	64.141		1.1278	377.49	11.0756
		1.64758	99.2763	30.5271		0.712097	-113.113	173.934		0.505831	110.139	72.2147		0.88544	-3.25234	90.5959
		0.606613	75.0442	48.6976		0.729055	-13.1525	102.994		0.548347	-25.6213	93.2411		1.28325	86.1821	74.009
		0.82848	120.398	12.188		0.473717	-3.71105	93.7218		1.08548	192.684	56.7141		1.57157	295.428	36.5941
		1.55829	126.948	23.7269		0.714311	89.4912	35.9726		0.941676	226.666	50.2476		0.580788	-175.374	121.105
		2.20155	88.1617	40.2223		0.255419	59.7431	38.4925		1.17326	-196.528	146.492		1.32579	268.059	6.57674
		1.97018	122.098	25.3772		0.525001	56.9846	48.8396		5.78146	-298.245	142.482		0.603522	229.076	25.0781
		2.00604	112.207	26.9638		0.487462	2.23893	89.7049		3.53468	239.434	47.8742		1.79391	188.094	35.9112
		1.70937	119.77	25.75		0.188804	-9.01005	105.963		3.15303	482.609	10.3046		1.1727	84.3144	51.9212
		0.229679	22.5704	73.1369		0.516634	9.29131	68.2559		1.2944	368.166	25.5517		1.70068	52.5292	8.33885
		0.306427	112.898	10.0196		0.815751	155.63	6.38094		0.791118	-439.449	172.956		1.0427	196.651	3.59846
		0.200581	69.605	39.8249		0.266387	-0.794189	90.265		4.35921	-463.084	175.015		0.611807	134.667	14.749
		1.61939	90.0706	53.3901		0.575773	117.903	31.081		1.31553	312.074	45.428		0.850903	78.6193	9.93222
		2.09479	86.7562	35.6956		0.96654	57.5793	36.1921		0.350855	36.2113	76.9563		1.00779	24.1803	46.1855
		0.233875	127.46	37.2289		0.479737	-27.0789	165.243		0.705545	376.926	3.14452		1.93006	-44.2916	123.548
		1.27311	150.845	7.57268		0.506594	67.139	26.1144		2.19356	169.259	58.3653		1.50597	-223.035	175.917
		2.28503	86.2681	32.805		0.310181	120.47	49.8978		3.54287	-134.433	138.301		1.97177	315.214	41.3178
		1.90044	387.801	41.7248		0.0661433	68.9836	1.24852		2.68057	-275.436	178.412		0.525203	251.564	37.6257
		2.43927	41.5351	84.606		0.143005	-46.3142	175.663		0.423973	315.009	24.6749		5.10782	467.682	9.08379
		2.28704	297.38	1.20908		0.778689	-355.196	149.597		3.81808	241.175	20.7455		2.08429	8.69671	85.4045
		2.56365	319.083	21.0221		1.58855	214.45	55.8758		0.777398	-231.076	150.904		2.75485	13.6638	15.8841
		2.12636	232.599	1.04001		2.77915	443.321	7.81819		2.32612	-18.2401	97.8677		1.96417	-8.26852	169.904
		1.50736	67.9734	1.4774		3.1948	-29.2768	107.336		0.321397	-310.857	168.288		4.34136	167.996	18.4436
		0.601942	-55.699	136.309		5.64656	176.568	64.6096		4.69309	-203.766	130.93		4.1813	-105.822	139.172
		1.17377	-63.2113	133.9		0.293015	483.216	11.041		2.92685	-431.454	150.756		1.34584	-153.543	117.21
		1.59308	-139.796	150.805		1.52357	50.6174	63.2081		2.1892	-216.84	130.657		1.55191	260.177	29.1333
		1.65345	-222.987	132.586		0.854835	88.3586	67.5952		0.79747	42.5352	81.5918		6.10308	-85.135	146.852
		2.02321	-103.924	107.402		0.483314	-74.2355	103.459		1.05695	-302.896	145.603		0.991757	-156.845	161.348
		1.74233	-102.279	107.396		1.04286	-74.138	107.113		2.18777	-404.288	168.536		0.529138	24.8494	68.8235
		0.890136	-46.3844	101.807		0.528264	120.334	21.8561		1.20577	-165.671	147.814		5.53392	-110	157.611
		2.89806	104.443	10.7883		1.11489	-204.098	177.448		1.73423	-168.657	177.114		0.501713	263.921	9.12215
		1.06766	271.115	23.1008		1.51162	101.599	20.84		6.12072	257.748	26.0235		1.66298	-55.6076	139.007
		1.62262	-25.4719	93.7587		0.440042	226.089	37.9767		4.59688	-50.4472	120.219		1.08151	-68.457	124.449
		3.72139	70.3406	46.3783		1.43287	-412.971	179.406		2.19919	21.2709	82.169		1.8605	-119.785	131.263
		1.11846	48.2086	63.4571		0.419347	-90.4137	103.964		1.34483	200.303	5.4053		0.839662	-116.154	139.723
		0.797397	136.014	7.50486		0.472171	116.789	68.6119		1.34768	507.623	0.30231		1.06457	-102.327	159.048
		2.10416	173.35	6.95773		0.622755	174.42	31.95		1.12324	389.487	27.7943		1.29341	-29.7664	139.901
		0.916504	112.165	7.46308		0.314695	-93.0672	179.856		1.67352	393.922	34.1789		0.496173	-56.307	112.865
		1.66757	31.5613	16.1462		3.5307	-338.79	175.967		1.54791	352.202	16.8729		1.51097	-230.844	168.047
		1.67574	146.046	3.18109		0.436339	-8.95036	92.6114		0.149648	230.955	9.18014		1.76869	32.3752	75.7119
		1.70596	130.823	29.5785		1.3713	233.198	20.5954		2.66005	-354.38	142.582		2.89188	-205.604	158.392
		2.25605	149.327	24.0196		1.28543	116.177	14.2726		0.815035	313.057	10.7365		0.526984	-398.201	146.867
		2.52596	389.741	10.0879		0.653137	221.634	4.62859		1.27924	-380.386	175.131		4.86494	289.971	13.642
		1.34747	59.8776	77.6494		0.526799	205.79	5.75003		1.23283	-381.328	179.019		1.15504	-12.9715	97.2622
		2.75361	298.777	9.99266		0.521006	153.251	41.9942		1.83128	-508.57	171.74		1.14178	7.28295	82.3445
		4.03656	49.1559	34.3683		0.577071	76.1896	15.8551		0.303265	-324.345	151.06		1.2389	-245.137	175.699
		2.91103	215.854	44.5067		0.249241	-310.841	139.074		1.23203	-358.767	160.776		0.450417	163.587	17.0163
		2.3479	-102.177	111.744		0.661381	-330.68	154.785		1.98918	-434.1	159.317		0.679702	55.7085	66.0759
		2.21571	117.781	0.0845394		0.541292	240	17.9423		0.817028	-485.013	174.495		1.38945	120.209	24.6333
		1.52078	139.011	16.3153		0.350551	-147.982	137.201		1.17851	-330.663	177.919		0.698368	47.2039	53.972
		1.23114	121.008	14.7296		0.326934	-198.023	139.521		0.26777	297.542	30.5428		0.170146	27.0532	70.3638
		2.19112	49.8564	44.1152		0.511352	43.8425	63.4242		0.318691	366.263	17.6175		0.727026	25.0881	62.8726
		1.29144	-6.47609	95.2404		0.787309	179.117	66.7702		0.706497	401.349	4.85774		0.667878	20.1924	75.6515
		1.52255	132.647	32.1822		1.26758	-141.952	114.574		0.344957	165.999	1.50617		0.716405	84.7417	39.3673
		0.296338	65.9576	11.3602		0.941757	-58.3504	97.1427		1.71117	222.578	0.372094		0.460871	225.999	22.8539
		3.69693	31.4664	42.9105		1.53801	-61.7166	169.104		2.33676	-135.425	151.181		0.860155	185.257	52.3734
		2.46174	-82.5936	138.655		0.863696	-49.3565	102.047		2.66699	-131.695	172.094		0.559211	152.678	59.6722
		0.935814	15.1905	82.3214		0.870379	-382.022	153.037		0.792506	-315.67	168.661		1.11948	-17.6174	94.9872
		0.941853	182.281	19.0715		0.513749	381.955	6.83181		1.4812	-181.213	153.206		1.54159	-118.754	113.736
		1.25188	153.557	32.0721		0.810559	-6.97819	91.1105		3.14951	-78.0807	158.235		0.76593	-235.058	135.826
		1.98293	102.754	17.851		1.33349	-134.684	110.181		1.04869	-298.873	163.632		1.03348	-323.92	142.586
		2.41542	90.0682	31.1881		1.41205	268.551	2.09251		4.03205	-232.296	166.806		0.809259	69.3277	81.588
		3.02022	5.07332	83.3758		1.09181	156.847	1.47758		0.138133	-93.3771	155.957		0.555574	-156.146	112.499
		2.26782	39.2513	64.593		0.98356	87.2969	6.69354		0.743347	-31.2124	129.491		0.681171	-121.198	108.651
		1.83051	25.2777	44.3152		0.617651	343.362	2.36264		0.431324	-2.11183	91.9612		0.402001	-28.7212	97.1939
		2.69766	61.1464	12.4405		3.86659	95.3122	67.3936		5.48329	71.33	15.7136		0.386751	-66.0957	155.025
		1.69576	27.1714	44.2766		0.64443	180.198	58.6471		0.986555	199.13	34.1643		0.107976	-67.2751	117.589
		1.92481	34.4541	38.4148		0.219752	139.886	10.4106		1.34282	59.1443	35.1169		0.287297	-78.764	115.788
		2.52943	-24.0124	164.604		0.768432	92.4189	10.3012		1.05599	108.639	27.6701		0.494118	-47.6147	102.168
		3.10274	74.0352	67.3345		1.21598	280.358	4.74563		2.33687	-14.3743	95.6005		0.121532	-69.3081	150.598
		2.3854	-134.959	122.798		0.509175	216.208	28.5354		1.54488	-88.8284	175.921		0.168782	-111.649	150.963
		2.29431	-18.4724	135.9		0.457795	370.66	4.98519		0.590018	-15.9873	95.35		2.04684	-17.11	169.155
		1.97844	89.9403	43.0211		0.284782	345.296	10.297		0.781623	47.2042	43.9055		2.10109	476.477	2.02979
		0.620623	26.0613	70.9408		4.9175	213.882	9.71275		2.22036	-222.545	172.818		1.56385	273.557	27.8587
		0.56162	-15.6249	108.882		1.98842	-172.415	137.727		0.66173	-46.5369	161.565		0.725555	159.356	21.2543
		1.35261	-54.8535	149.591		2.7344	-199.308	156.513		1.08628	5.77572	61.0114		1.13319	129.401	12.6511
		1.36995	18.8911	69.89		1.46268	-410.558	145.973		0.0671846	-39.8828	106.08		0.943591	77.3822	22.3905
		0.960731	14.1975	75.4444		1.00334	-185.272	150.581		0.310589	81.1104	73.5061		0.947861	13.0693	61.0948
		0.946491	44.9614	59.142		0.852993	-102.715	152.482		1.45061	-223.986	172.194		1.83747	-85.2831	179.723
		0.794527	69.5833	36.2181		0.973637	-279.188	165.714		3.78952	-185.177	150.315		1.12693	-215.249	148.678
		0.47991	77.5518	35.1048		3.68351	-154.535	143.592		1.32302	187.824	28.2716		0.541249	242.693	11.35
		0.393513	105.392	41.139		1.38058	-336.901	143.686		0.49939	318.442	7.70699		1.17657	148.674	11.4055
		0.3831	85.212	26.6192		1.0231	-112.211	130.231		1.41434	101.653	36.5539		1.35301	39.817	35.7868
		0.203849	41.6541	48.6973		1.18845	348.122	25.7987		2.13891	-146.18	177.755		0.25667	-16.2547	105.008
		2.52227	9.71764	63.5595		1.93705	8.62676	85.6588		1.48416	326.353	43.722		0.386529	-30.7102	106.921
		2.56554	1.31853	87.4807		2.17817	-389.701	151.477		4.71095	216.485	25.3693		0.465285	-14.6539	98.3995
		2.78063	51.961	49.5887		1.19714	-49.8771	100.767		1.13817	124.275	42.0335		0.164193	-107.889	151.937
		1.78897	24.4057	63.2856		0.41306	-19.073	99.2169		2.03158	226.421	36.6706		0.611656	162.694	43.7855
		1.60418	64.7121	35.262		1.51927	47.8975	79.6365		3.44456	83.2418	58.1465		2.14645	58.7634	78.9064
		0.735728	61.8442	37.3521		1.75377	-64.3757	104.637		2.44479	-45.9279	160.744		2.03812	-278.46	151.366
		0.122372	79.2603	3.54601		0.1755	-46.2833	147.941		1.97062	-65.7013	134.844		0.596334	-260.623	158.543
		0.758635	85.5341	2.59054		1.2907	51.3518	68.2376		0.884738	-13.6531	104.555		0.754385	374.693	41.4721
		0.49054	36.5907	49.4883		0.671654	118.5	60.0705		0.495832	-102.638	144.033		1.50332	408.936	18.5888
		0.224004	81.1929	3.90445		0.504631	93.3828	14.0258		0.728264	3.17655	86.9894		0.372231	101.184	37.1929
		0.368864	74.1834	13.7158		2.07001	126.899	42.2414		2.31786	-127.138	165.895		1.23236	99.4213	57.6627
		0.361571	99.7543	26.3228		1.22354	-372.616	168.016		1.4245	-77.1864	169.131		0.491535	169.249	15.782
		0.642428	166.282	9.39649		0.0580317	-21.6401	179.554		4.25849	-281.379	169.244		0.246395	-33.1548	95.2151
		0.669021	161.821	10.1876		0.549006	-416.03	143.891		2.54535	404.499	29.2643		0.197907	276.734	12.4974
		1.13274	73.3128	57.4646		0.931593	-318.761	159.72		0.181926	298.254	20.6405		0.592288	133.026	21.0762
		0.94716	71.1491	52.5013		0.348719	-115.685	114.851		0.483163	73.9393	75.0026		0.238388	128.396	42.1409
		1.39677	111.16	35.9828		0.67804	295.524	29.9781		4.92103	407.466	7.41823		3.51797	71.7249	13.2617
		1.55722	70.6555	48.9799		1.2777	-99.0505	137.01		0.677674	-328.907	150.028		1.57348	-166.066	161.365
		2.19629	139.829	31.2137		0.452475	-134.383	131.473		3.06353	-327.706	150.502		2.50004	385.557	0.307901
		1.38134	109.384	20.3521		6.18339	-306.66	169.364		0.447801	120.999	60.0986		2.79765	-318.568	135.688
		1.92815	171.161	4.74651		1.04505	84.6395	74.2879		5.43596	-149.732	107.654		1.93861	366.804	25.27
		2.02787	203.584	1.34923		1.39294	-427.998	163.098		1.10345	267.501	0.977189		1.4025	83.7388	39.5889
		2.51333	171.25	18.8038		0.694489	121.167	4.90668		1.92254	47.0442	66.5198		1.90756	376.36	15.4889
		1.77559	134.702	0.828447		0.953006	118.003	11.9036		6.39345	10.8206	88.2682		1.60365	-73.4262	170.688
		1.62684	157.768	1.4464		1.32428	37.8577	43.3181		4.57244	-161.032	135.911		0.0949127	226.504	37.676
		1.28057	162.162	18.5229		1.30446	6.28951	85.5968		0.321038	472.065	19.2876		1.0064	298.557	42.6832
		0.670362	155.58	6.65858		1.25033	139.973	3.82219		2.46946	297.29	18.7271		0.397406	284.214	39.8516
		1.12816	147.984	9.8165		1.29841	4.82915	84.5482		0.967302	-508.61	174.089		1.14745	156.064	66.7837
		1.22608	162.164	6.33328		1.03373	39.4262	8.47156		2.85832	202.934	5.36771		0.377408	26.4347	75.3134
		0.634485	131.944	14.0763		0.928497	-12.9177	119.865		1.57654	473.396	12.475		0.86508	-48.4419	122.906
		0.283273	144.111	3.41161		1.08121	38.9185	47.2851		1.25561	143.892	17.4292		0.359167	24.4266	75.0956
		0.296311	119.233	28.7472		0.771633	16.1728	76.0468		0.683367	-225.439	162.877		1.61809	174.657	67.6039
		0.652791	133.217	1.35938		0.48084	-10.1467	95.3226		0.980077	-133.82	179.38		2.28863	203.303	55.0082
		0.504084	144.53	5.74464		0.166697	79.1188	22.7438		2.14278	-22.1451	155.821		1.47546	-48.6181	101.037
		0.127855	130.899	11.1847		0.495327	143.168	18.6134		0.453883	-229.442	161.403		1.73368	-73.8793	115.771
		0.733603	187.796	7.36805		0.391938	192.738	19.9336		0.564183	-317.462	172.8		1.61799	-146.103	150.049
		1.24058	164.653	10.4811		0.955932	79.5037	20.6098		0.880848	-129.885	142.58		0.961666	-365.047	162.309
		1.35517	178.038	5.27687		0.323203	82.8199	37.4428		0.106901	259.221	43.2618		1.06397	289.151	20.7504
		1.52137	127.114	22.8227		0.454796	61.66	38.8494		4.83284	380.835	38.8334		1.23279	66.9124	65.2575
		1.05581	86.3535	9.37882		0.717214	198.499	20.2833		4.07616	-87.2734	102.03		0.455748	140.36	28.7515
		1.11928	51.2074	25.9082		0.889556	82.2189	5.83795		1.91354	414.53	0.0570358		1.02753	84.8534	24.7831
		1.09104	91.6713	18.4858		0.826853	213.59	36.2851		6.21071	142.831	41.7314		0.943393	54.0338	43.8602
		1.06032	97.093	18.1857		1.1919	61.2099	55.2545		1.02974	86.8402	77.9384		0.830065	-37.197	118.901
		1.10036	128.345	32.6185		1.18433	-245.694	173.263		1.93067	223.462	17.4129		1.5023	-148.689	172.118
		1.59771	205.373	3.57018		1.30344	192.286	4.38974		0.993438	206.181	55.3085		5.49096	200.505	26.6719
		1.98364	186.919	3.99642		0.881331	205.179	6.63833		0.549033	55.9763	44.6365		2.48899	356.193	14.0316
		2.41436	193.22	10.6354		1.2159	-22.2076	130.593		6.4905	121.495	17.8296		3.61943	231.315	3.4452
		2.02231	181.149	4.50768		1.32892	-225.592	135.979		0.557693	-222.686	153.074		3.07319	-39.3405	148.57
		0.629206	158.978	23.9155		0.130942	-362.372	136.395		1.36236	-85.1124	114.04		0.788015	195.78	9.82126
		0.61357	97.6444	62.1902		1.92127	-383.658	155.401		1.6788	-96.7082	105.21		1.52805	125.468	21.879
		0.367882	197.314	40.9791		0.490376	160.807	71.3464		0.440485	-428.289	175.437		1.49411	293.994	18.9677
		0.207722	233.048	7.2539		3.32952	175.098	50.7404		1.182	163.426	68.4872		0.493571	195.747	2.0473
		0.874344	66.2723	35.4219		2.40924	117.261	64.4937		1.60249	-153.262	126.598		0.336418	-165.012	114.004
		0.489471	52.534	3.59494		2.0079	-182.961	154.914		2.62676	-83.7497	152.478		1.24328	-356.874	134.77
		1.09414	201.432	54.6796		0.497742	-190.367	177.242		1.89448	-381.217	151.548		4.96528	325.348	17.7948
		2.41054	89.0093	20.0768		1.40993	-308.411	163.744		4.382	-271.682	149.97		1.94311	199.309	35.7852
		2.61232	20.8847	61.6975		0.705364	-152.532	177.588		1.57275	202.248	40.2745		1.87403	145.03	57.6962
		1.97348	-16.7768	100.891		0.8079	170.511	33.0803		0.124497	-132.203	135.627		3.05455	37.452	79.4384
		3.68611	196.845	31.3208		0.601965	81.5923	47.189		4.02216	-260.653	157.859		1.51981	97.8877	58.0539
		2.02412	103.068	0.300635		0.808208	-3.6512	93.31		2.98084	273.224	37.4612		1.0664	78.1085	57.7944
		2.2342	27.4984	38.2811		0.293407	-147.514	178.527		1.82704	-26.7433	106.023		1.8552	-127.595	139.053
		1.79961	30.3752	64.0721		5.80392	-435.663	173.099		5.60284	-325.45	142.705		0.050405	-256.055	140.397
		1.57124	85.6336	32.7505		3.02421	302.814	47.7265		0.755291	-299.15	139.953		1.07832	-131.019	124.821
		1.31643	101.647	37.3689		1.0912	55.2848	82.5579		0.548849	-438.071	170.458		0.892671	-270.634	136.598
		0.430993	66.9445	53.727		0.379698	164.02	70.5096		0.326018	-270.188	149.591		5.16645	184.419	49.6822
		0.785625	81.9824	49.1275		1.59541	107.904	38.097		5.2124	345.423	17.6957		0.526438	150.779	7.41224
		0.435449	153.348	0.0644123		1.54881	40.2745	63.9904		0.377332	-192.709	118.029		1.89684	-38.3781	100.248
		0.736571	102.963	38.9927		1.13387	84.4043	40.8368		0.336892	308.719	44.635		1.23905	155.528	54.6383
		1.04676	24.5989	67.871		0.354391	115.123	27.1073		3.23971	-405.186	149.312		0.476279	-164.002	161.579
		1.22793	80.6205	33.9843		0.227586	95.5574	72.4286		2.82458	-192.608	142.021		0.77546	-18.9619	100.717
		0.806625	95.9795	20.5982		0.321377	51.0802	76.8478		5.00133	316.28	22.412		0.674546	-73.8574	177.289
		0.598838	57.5204	12.7411		0.21364	385.575	38.184		0.617165	137.37	63.3558		1.54826	-28.596	115.692
		0.295543	80.5123	31.3751		1.62508	324.406	39.6595		2.5561	54.0087	78.8677		1.19216	-122.053	134.857
		0.750512	122.959	12.3406		1.04796	114.858	65.1506		2.75915	91.0305	53.2377		0.483886	-334.338	134.901
		0.925552	66.8465	30.1921		0.781374	47.7541	79.5589		1.8537	-78.2698	146.513		1.24361	-472.997	156.821
		0.282028	61.9435	34.0859		0.366815	57.5599	80.2223		0.250018	194.302	23.4396		0.676829	216.733	40.0872
		0.12309	65.0225	64.4816		0.150188	-89.5866	107.684		0.478511	83.7618	50.0841		3.51345	280.761	17.1002
		0.619308	143.98	12.4983		0.27832	44.6508	77.9433		0.290227	-317.453	169.119		0.296637	-137.972	120.579
		0.154364	91.0567	6.83957		3.5637	438.259	27.6868		1.23234	-230.566	177.143		1.27568	-43.0278	99.502
		0.391334	106.31	9.55838		0.790616	54.443	54.3747		1.00346	118.265	42.4492		1.27916	17.246	85.2091
		0.482594	109.713	6.91744		0.207248	255.543	34.594		0.55717	120.594	38.6289		0.919061	89.3887	68.4551
		0.295945	48.8215	25.6358		0.467819	-115.485	126.696		0.182587	-7.17277	103.059		0.513894	-7.49476	91.8003
		1.49297	144.563	27.5739		5.25021	126.318	71.6841		0.465631	160.182	17.0955		0.687219	77.7872	63.3584
		0.309634	-41.658	127.851		3.22754	150.642	64.61		2.23068	51.3868	10.18		2.81639	89.2341	66.8768
		0.678314	-38.601	118.928		0.67135	238.046	51.8962		1.40902	149.923	6.38107		2.29385	-98.7992	112.989
		0.469272	161.982	27.7673		0.47	-156.622	176.891		5.62443	42.7878	21.5625		1.50311	153.21	45.0564
		1.03978	93.2113	15.9716		0.589619	-311.083	156.484		0.519609	-134.057	177.373		1.272	-31.7433	100.468
		1.22312	256.164	56.8535		0.415375	325.877	33.6964		2.51251	-138.452	172.404		4.49713	-112.902	151.18
		4.75745	60.7081	79.9677		0.321611	399.281	8.58355		0.576354	278.903	20.6392		3.08525	-213.943	147.175
		2.89844	-367.727	135.905		0.668849	372.346	35.4963		2.07652	16.4328	75.0352		1.87194	1.12222	89.3715
		3.60867	156.76	19.3364		1.05295	59.0394	63.1073		2.28199	-94.4227	179.557		2.14548	15.4261	82.1797
		2.82574	-45.1674	174.712		0.871553	15.9643	82.6503		1.06739	124.946	71.3845		1.29801	117.745	28.3834
		1.65619	16.2879	66.0355		1.23898	-28.1216	161.992		3.25167	-432.269	153.904		0.733025	17.6557	87.7919
		2.85412	211.312	8.73766		1.19461	-48.5068	115.491		0.418259	-324.695	156.955		2.2892	276.877	0.118906
		2.4241	154.825	1.23943		0.894254	-275.473	169.719		0.974677	-515.632	179.392		1.63767	11.0281	80.6918
		2.41829	13.9713	21.5136		0.952524	-450.706	169.633		0.83369	-124.787	143.914		0.783076	63.573	2.79152
		1.19906	-11.4654	130.568		1.27997	-463.174	169.696		0.984226	420.973	22.3085		0.275723	30.1102	47.4221
		0.975874	-13.273	105.575		0.199086	-216.737	115.984		0.812398	335.372	45.7506		0.151551	53.2848	39.5657
		1.47829	90.7072	12.5796		1.70017	258.853	14.7883		0.164705	122.285	74.6155		0.677002	79.232	12.2582
		2.01375	47.4038	12.7371		0.853715	226.607	45.4609		0.675793	244.683	41.8634		0.409121	85.6561	9.58287
		1.59354	104.696	18.6789		0.876192	198.893	17.3965		0.0709051	352.638	0.584294		0.366297	132.545	12.8846
		1.36989	186.772	9.47063		2.0996	-66.7025	111.392		1.0913	-289.203	154.523		0.870713	53.5243	31.2055
		1.62229	158.308	15.2763		1.31729	-144	159.133		1.1766	-211.034	143.096		0.8054	60.6567	20.3895
		1.9037	200.127	13.9555		1.22365	335.329	29.4608		0.902653	-464.531	161.872		0.822195	44.6997	41.422
		1.68225	227.598	10.5724		0.718963	293.08	16.0541		0.505632	-241.623	179.099		1.51453	22.2344	43.2643
		1.15037	173.45	19.2582		0.49667	17.237	86.2858		1.19143	-120.001	144.368		1.49539	-34.3166	150.911
		1.63187	74.5776	14.0952		0.438842	-237.265	133.47		3.2191	211.534	37.0598		0.209413	256.79	45.0953
		1.16004	119.37	35.619		1.85156	120.578	12.2244		2.04567	-344.11	176.977		1.11776	3.92809	83.2344
		0.381505	98.6529	38.0918		1.81397	121.31	47.6942		0.622403	-144.424	155.518		2.12438	-161.064	145.808
		1.29713	41.7945	67.5945		1.07278	490.945	8.37084		0.302483	-74.0718	126.179		0.236643	326.667	19.2708
		1.31201	46.9677	54.4585		1.42732	369.731	0.488194		1.13873	-5.50479	93.3282		2.24376	166.712	31.6147
		1.70709	-17.1918	113.807		0.767616	144.947	14.156		2.78998	-203.842	138.865		1.9708	89.4845	24.4233
		1.06012	-22.4249	103.348		1.13047	66.5076	37.6997		1.04526	-40.9654	118.977		1.14701	40.5228	66.0808
		1.51069	-273.505	154.997		1.15509	87.077	1.10048		0.22672	221.501	21.4386		0.881878	-24.0783	109.749
		2.50087	397.119	9.72931		1.62841	-213.897	125.372		0.672512	307.71	12.5651		0.421002	33.725	84.2084
		1.61735	197.147	28.3746		2.03572	113.443	24.9594		1.08847	-47.6649	151.737		2.97329	-242.907	141.336
		1.47629	-221.379	160.954		0.189128	26.4661	86.1493		0.951268	-94.3041	170.924		5.46352	23.8045	24.6011
		1.97473	264.592	12.394		0.366798	-326.577	132.287		1.92926	-229.647	171.194		0.806855	173.486	46.0042
		2.89109	166.129	29.2316		1.22449	249.567	33.7811		0.232091	-172.986	177.045		1.18966	240.858	41.8206
		1.39988	101.915	24.1063		0.687051	-4.84626	90.7035		3.99303	-67.8601	169.978		0.693342	311.638	9.14513
		1.26345	132.19	33.0361		0.362152	-110.076	107.838		1.14079	377.849	32.4582		0.616615	232.766	15.7067
		1.10143	-13.0492	94.2873		3.5815	374.649	32.2819		0.933256	67.1521	52.1511		1.13822	184.103	4.61769
		2.4086	11.7285	86.7641		0.202388	69.9692	59.8275		0.941181	-471.065	172.344		0.669724	74.8136	31.5547
		3.22098	53.7934	42.2153		0.542819	117.337	13.9518		3.36177	-335.949	151.005		0.740253	126.328	6.30442
		1.94985	-39.6119	159.698		3.95962	-111.783	105.116		1.77039	-163.732	114.12		1.34177	77.1956	0.000701201
		1.82369	49.6481	21.1874		1.10236	181.388	3.4003		0.65084	-149.536	137.969		0.94584	-2.63022	120.851
		1.24866	67.2955	3.15255		1.2308	120.396	68.724		1.32693	-151.299	143.15		0.302943	-34.4151	145.633
		0.544211	116.096	5.81915		1.6561	-55.1574	104.26		2.02762	63.8425	46.5723		0.906625	-40.255	135.098
		0.400098	52.3486	55.4806		1.51775	-200.713	142.716		0.263334	-51.1978	121.871		0.869642	-73.4679	149.342
		0.0886825	108.392	23.6748		0.297937	134.502	15.7058		0.387683	-176.23	179.279		2.09614	-103.482	157.178
		1.50796	189.522	8.59074		0.917294	146.932	1.46395		1.25976	-84.4635	140.298		1.46282	-232.514	171.382
		0.918335	139.405	11.2458		2.58076	56.8429	37.1907		2.18399	-195.355	157.488		0.954657	-273.256	163.397
		0.935224	152.859	16.752		0.373889	-145.808	113.321		3.46155	-150.771	177.13		1.98341	-52.2649	167.677
		1.11047	76.9651	30.8668		3.78942	-172.243	154.946		0.305368	123.249	20.3492		1.48594	37.8883	56.6956
		1.83319	135.159	6.80261		1.04911	-4.06119	117.325		3.72959	-77.4908	165.089		2.31281	8.3989	87.457
		1.53763	83.2866	22.1427		1.0847	-140.158	143.84		4.25349	-146.077	179.135		1.62625	-66.0839	136.597
		1.75753	298.299	31.2421		0.511252	-159.105	131.679		0.748916	324.572	4.44355		1.99877	-83.299	171.997
		3.09716	453.792	17.1404		2.95628	-189.854	125.212		0.319767	186.947	42.5932		3.67766	-254.027	157.271
		2.72805	437.36	3.17556		2.11522	-90.6226	100.144		0.212067	159.112	17.4335		1.92729	-235.741	153.834
		1.35276	190.123	17.6976		0.560097	201.49	14.9464		0.788871	-345.028	156.739		1.8984	-12.4227	98.1462
		1.73162	232.604	41.0222		1.14617	242.681	5.13298		1.37657	-170.302	146.193		0.484065	-42.2012	165.196
		2.15449	61.0499	31.1286		0.779885	223.192	5.51246		0.661405	69.6008	66.0225		0.204337	-177.22	138.309
		2.58455	252.391	8.65449		0.607285	155.449	5.93863		0.0505998	242.305	0.300251		1.23646	-111.279	170.471
		2.04005	44.4645	36.6726		0.631276	153.117	9.84504		1.42143	-399.612	176.512		0.831517	-97.9796	127.709
		2.6996	-352.807	177.089		0.614024	170.495	4.56424		2.75499	-443.422	161.026		0.806828	41.7257	19.1494
		1.58542	140.227	69.3015		0.845877	-44.2558	136.54		0.762983	-310.58	172.636		1.07278	-72.1482	143.154
		1.99188	73.2504	46.9142		0.323833	191.29	7.08886		1.28792	-218.868	163.98		1.36016	-97.7736	164.709
		1.71565	34.9934	1.75551		0.358744	176.486	13.6095		0.570725	-108.469	169.347		0.933019	-223.352	170.177
		2.18419	101.725	16.3475		0.348527	201.699	4.65054		0.830919	-62.4749	145.47		0.0981212	-130.926	149.38
		2.13493	150.243	10.4313		0.478325	88.9993	19.2154		2.90808	-19.7376	133.007		0.953071	-165.411	166.691
		3.6884	150.854	46.7354		0.280153	43.042	33.3252		2.30175	59.2511	59.5001		2.19829	-14.112	119.18
		2.56606	-95.0268	121.719		0.724652	-76.2017	118.146		2.14643	-208.984	147.563		1.05078	12.6978	11.988
		1.42569	207.269	47.8484		0.196468	-33.5559	167.579		0.504221	-62.0347	107.145		0.444079	5.95155	79.7548
		0.409547	-72.3938	116.317		0.347961	43.8756	80.6726		0.631767	-10.5763	95.544		0.352441	8.50105	35.9473
		1.6072	-26.3797	97.6881		0.39755	-91.7165	115.194		1.13843	136.952	52.4405		0.876544	20.1623	42.7941
		2.20535	-166.208	156.072		1.41471	200.366	31.6351		1.97133	15.3951	83.9164		1.11744	-77.5464	167.399
		4.05832	-78.8575	99.5227		1.82539	151.058	34.9407		1.0779	-326.222	168.852		2.06117	-69.2353	159.4
		1.56711	-263.11	175.619		1.11663	-123.09	156.163		1.75961	171.594	14.038		1.6891	34.2356	30.1821
		0.22519	-97.0527	111.9		1.0454	-37.3958	145.927		3.64362	-505.382	177.606		0.422458	106.995	18.8501
		1.55423	-129.762	119.431		1.27193	-149.511	160.683		0.984926	32.6014	75.0288		0.93526	67.7213	17.1368
		0.35605	133.866	6.11616		0.326615	438.461	2.26313		2.20613	-90.9962	149.479		0.987051	52.4736	3.96362
		1.02441	-34.4453	107.717		1.70471	370.815	8.76378		3.75688	109.112	43.3511		0.74664	57.1264	7.4493
		2.70802	-106.165	153.735		1.20334	128.21	26.2801		0.536289	-246.632	171.565		0.521347	20.8031	25.7602
		2.54794	-122.117	164.443		0.962962	7.03182	86.2849		0.414241	256.009	2.23084		0.75674	-8.88578	129.077
		2.07509	-204.1	178.155		1.02536	195.036	9.20487		0.101232	403.178	17.7028		0.980689	-38.245	164.737
		3.43711	-113.336	125.886		0.761276	43.598	60.5087		1.12752	106.72	73.9556		0.199929	-81.4433	144.619
		3.81086	-74.2878	108.445		0.37506	37.6509	65.2131		1.90379	80.4766	64.3713		0.694238	-58.1591	162.029
		2.48851	-124.713	132.544		0.802524	119.854	23.8707		1.35378	41.4129	61.5656		0.385721	-123.029	168.653
		2.64834	-144.194	179.046		1.28752	113.52	2.95747		2.14989	-90.5847	122.993		0.587897	-118.197	161.878
		3.98397	-412.392	166.061		0.139774	131.303	28.381		0.325409	-51.553	155.732		0.103826	-126.974	141.46
		2.45132	-156.724	118.553		0.928163	214.895	9.62014		0.379139	241.697	4.39413		0.280951	-245.987	179.191
		2.72549	436.858	12.9541		1.34302	254.707	6.63385		1.07376	169.912	9.27732		0.532163	-229.665	178.733
		3.71146	-1.75716	91.5874		1.02175	213.167	12.1985		1.87727	164.51	37.804		0.941611	-277.134	176.858
		3.79835	-111.394	128.987		1.52113	188.748	18.8263		1.31611	459.528	1.59248		1.03461	-336.321	175.77
		1.89264	13.3628	75.487		2.4396	210.84	5.30667		1.23119	-263.777	128.344		0.267143	-365.311	167.18
		3.33645	46.9455	74.1113		1.41559	126.476	17.2919		1.67131	-52.4415	133.984		1.01393	-461.041	177.323
		0.91405	33.6037	35.779		0.992258	182.333	29.6723		6.11986	-340.472	160.529		5.78157	211.301	8.76486
		1.41872	186.592	5.64809		0.106339	98.6929	56.1839		0.643221	130.121	46.9079		1.25964	-317.047	146.938
		0.81955	408.343	5.5525		0.335696	236.531	19.4819		0.744143	-151.746	174.974		1.14639	222.955	27.911
		0.613259	351.249	17.096		0.99834	211.251	8.78023		0.571178	-52.9629	170.718		1.21312	103.002	65.5646
		0.960945	68.4168	50.796		1.12599	47.9834	18.4226		2.89115	-174.14	171.284		1.1621	168.011	47.704
		0.718939	140.154	28.718		0.311717	25.5973	60.2876		1.17145	-479.647	162.395		0.992528	8.61031	85.9225
		0.828156	166.416	0.924154		0.520244	31.9758	63.8682		1.5267	-235.496	118.499		2.30117	265.871	20.4279
		1.47056	199.401	7.12055		0.826994	87.8644	26.7833		0.754801	377.58	16.1796		2.83991	288.523	7.0311
		1.57905	144.86	13.9312		0.359603	108.616	1.20345		3.10745	400.193	25.9982		2.07317	-76.4304	120.322
		1.68509	221.438	14.7968		0.518571	196.535	8.40302		2.01578	-133.259	173.715		1.34986	-446.756	151.827
		2.0764	180.379	38.8775		0.105151	40.4779	63.9267		4.04598	-77.5891	151.677		5.81634	-192.092	119.983
		3.33992	244.263	59.968		0.593284	243.371	5.06759		0.136908	187.346	13.8131		1.73802	-54.2583	167.421
		3.27459	305.401	26.9373		0.553859	219.855	4.93461		2.0831	409.193	21.6185		0.752453	-125.987	128.221
		1.40727	245.135	25.7768		1.0637	243.079	1.90299		5.08689	25.627	85.6566		1.38437	-110.376	116.654
		0.919074	258.749	50.2638		0.984685	132.531	3.2877		1.3482	303.387	41.7164		2.15812	143.944	3.62775
		0.909896	-136.724	152.163		1.37387	-98.3886	167.651		1.14822	-381.125	151.673		1.13667	118.729	40.1136
		4.07252	-153.593	140.756		1.08815	-458.781	165.711		2.09256	0.931584	89.3787		1.86795	-273.709	161.15
		2.25229	-30.1259	117.413		1.52054	73.6054	28.7832		4.60504	46.1571	64.1217		1.27049	-335.927	167.919
		1.80259	245.712	14.687		1.57801	-164.707	114.284		2.01019	217.066	17.1711		1.40027	-167.433	116.024
		1.50681	155.801	19.2886		1.57607	87.9679	12.678		1.11509	197.217	40.3038		0.93826	-431.556	153.976
		0.137143	-2.42199	91.0167		1.71195	-38.2482	123.602		1.41703	-163.739	127.498		0.916216	-402.593	142.169
		0.199329	-146.028	110.848		1.11701	-38.3435	173.982		1.07554	-468.568	164.393		1.24888	-313.261	154.943
		6.2641	-118.574	106.913		0.660571	-91.872	113.729		0.935444	48.4549	69.8136		1.79039	-244.942	139.964
		1.48057	79.2542	33.7208		0.988626	57.3714	44.2194		0.682942	-165.032	165.407		0.158909	-353.999	134.709
		1.62279	-95.0705	135.734		1.39227	-54.6322	137.369		0.292012	-73.7457	178.116		4.00536	-38.4478	113.926
		2.40518	198.193	56.3217		0.714651	86.3729	79.4093		2.00946	-117.138	166.87		1.16917	-425.956	179.848
		1.44635	-68.7299	117.66		0.5491	-334.516	171.929		0.628647	70.4348	54.5701		0.793064	-306.441	167.763
		1.37438	-374.884	160.734		1.61199	-466.274	175.724		1.11772	141.118	61.1966		0.95551	295.745	50.6419
		1.81877	-352.367	139.198		1.40718	-314.704	148.911		0.725597	-424.023	163.321		5.12165	360.881	26.2199
		2.17884	295.38	39.1306		1.13813	338.753	12.463		6.48133	-451.314	162.464		1.56269	23.9723	52.3341
		1.83419	-63.5237	107.97		1.57505	99.1209	40.9086		2.92818	151.484	42.269		2.07811	-6.98925	92.8315
		1.2043	294.629	54.5875		0.756826	-73.0019	169.798		0.53573	-417.698	170.979		0.893639	79.0042	15.8313
		2.68058	-117.807	104.044		0.926964	-175.252	178.895		5.42931	-415.834	158.045		0.448277	-24.4467	96.1271
		0.96794	-168.905	115.099		0.966153	-108.82	115.654		0.307311	492.634	4.6014		0.825454	-166.7	160.406
		1.38932	383.595	42.3088		0.164262	-317.2	130.317		0.995041	-34.4855	97.4651		1.78504	1.52473	89.7771
		0.846062	268.43	31.9257		0.280754	-323.873	155.69		0.421271	-449.058	167.597		1.32339	-151.729	124.073
		1.1008	-367.504	172.111		0.737594	74.2653	77.6128		5.26958	-340.806	157.596		1.14683	-228.836	117.709
		0.976415	101.246	16.9157		0.561724	125.662	33.1654		5.4123	38.2672	78.8898		0.684873	-193.563	144.045
		1.79473	83.1835	17.6696		0.805883	-80.9859	110.736		1.09212	502.38	3.95011		0.891794	-183.554	114.889
		2.10323	203.857	33.843		0.605502	367.529	32.8145		0.665404	89.1565	43.9687		0.820797	-195.297	141.894
		0.830534	309.971	0.223407		0.331894	119.856	32.593		0.580705	-118.609	162.547		1.96354	54.6288	74.9509
		0.772408	388.196	28.9172		0.295236	144.945	6.69172		1.44373	38.8629	56.6681		0.635118	397.28	30.5565
		0.854292	123.276	64.5186		0.437463	53.4441	57.3606		1.57019	45.0703	72.2545		0.954705	103.358	59.6836
		0.564759	96.4737	66.9591		0.430041	111.384	43.9947		1.57262	419.193	9.96332		1.7383	-181.821	125.989
		0.62943	-14.4619	93.776		0.927084	229.822	61.4073		1.03034	-84.1915	152.374		2.26298	414.969	30.1484
		0.203876	-173.975	148.11		0.5483	257.633	28.9124		1.58702	-174.334	152.512		1.75271	356.853	32.0792
		0.158246	-167.207	134.655		0.677415	216.561	27.1424		1.08571	26.597	85.4167		1.74279	-292.749	143.4
		0.56064	380.181	3.80471		0.0326105	31.0778	84.3101		0.292265	-16.2073	98.3867		5.09517	113.815	57.1694
		2.9016	-5.57609	97.9804		1.92995	110.053	70.0094		0.335826	184.401	3.60561		0.26544	-253.575	159.321
		1.73667	-235.256	173.159		0.645265	188.22	38.2853		1.86005	145.726	0.448764		1.8386	406.957	6.5982
		2.27163	255.4	49.9418		1.45516	420.48	23.2614		1.27855	466.763	13.5495		2.62087	215.102	31.011
		0.496558	-132.49	141.136		0.950895	66.0747	58.6648		3.03941	-64.2685	146.257		0.607222	-199.813	167.514
		3.53192	497.99	3.78945		0.449527	122.143	50.0472		1.33863	-13.2245	138.208		2.02726	-194.089	171.587
		1.51047	-41.869	124.55		0.453261	134.592	9.93027		5.60293	-163.397	136.021		0.504974	-72.9593	112.4
		1.22503	-335.458	174.281		1.11625	160.766	13.4861		1.94855	-3.5432	91.0616		1.91197	81.7135	80.1009
		0.539838	-394.468	149.853		0.859365	53.8924	8.9302		1.39709	96.979	17.2274		0.572225	159.323	13.3299
		0.889877	145.301	3.48497		1.09042	135.198	10.7541		2.0158	138.091	16.6385		0.581336	101.828	41.0041
		0.487678	-45.5144	161.66		1.59798	29.6722	46.3639		1.14127	-98.0669	169.851		1.973	81.0359	13.1704
		5.89076	-173.601	164.36		1.42767	19.4628	40.9062		3.77645	-326.505	154.64		1.18814	75.8186	54.1558
		0.68485	321.934	43.3069		1.71412	-49.4777	173.19		3.96927	451.382	23.3092		0.571854	36.8097	78.022
		1.50709	-8.46155	96.7577		1.28665	-59.0812	126.629		1.4577	-12.9924	95.6924		0.506344	-93.7747	113.4
		2.03366	64.2452	54.9904		1.47338	-114.634	147.021		2.33951	433.934	7.57678		1.12415	454.047	4.26746
		2.77246	51.0073	66.5645		0.759116	-115.461	173.598		3.27501	380.35	30.9521		0.754529	63.1984	73.7513
		2.96297	80.116	80.3108		0.789394	172.179	13.6839		1.94422	3.73952	86.3013		0.697867	277.297	26.7
		2.1279	-2.25604	121.763		0.972726	-39.5698	160.72		0.627101	-67.08	133.846		1.1531	124.531	7.63372
		3.14282	13.172	88.5237		0.332878	-111.835	176.735		0.217266	128.858	52.4219		1.4586	38.8926	52.575
		0.358056	144.547	18.0989		1.44822	15.8293	49.5846		1.0189	220.879	28.3489		0.392556	-45.5525	97.9733
		1.35632	-25.1882	97.5857		0.832194	87.7857	18.3189		0.425345	9.53231	78.7848		2.30976	-14.668	93.1862
		0.439344	-80.2061	114.676		1.16123	88.1596	9.22254		2.88705	-41.8054	121.853		0.370605	221.202	8.95952
		1.11131	-103.856	117.95		0.84119	47.9475	14.6742		1.4007	-195.381	149.019		0.916985	191.205	10.9918
		3.53276	-32.4259	106.168		0.988306	130.642	20.2604		5.46453	-215.785	150.299		1.3581	-31.8304	164.353
		1.60721	364.998	10.8583		0.110089	78.7266	51.6903		0.57823	262.635	27.122		0.725783	-118.516	132.981
		0.219729	20.8844	38.6451		0.88557	298.197	1.49418		0.468517	156.576	30.3077		0.331519	-4.37859	94.3606
		2.33839	-30.562	123.01		1.70566	202.063	23.0387		0.736656	232.482	33.1828		0.765257	-166.233	160.746
		2.92135	-181.981	168.434		2.30823	174.911	7.78517		2.38875	-12.7343	101.744		1.65576	-83.0556	162.913
		1.96522	52.9383	41.15		2.54817	-3.02338	101.101		0.959157	-364.148	168.171		1.56924	-57.1389	105.864
		1.76719	-124.218	157.194		0.836696	-52.6419	119.21		0.626907	-276.636	160.011		0.39455	-41.6963	107.985
		1.10981	-159.037	168.825		0.869265	-3.72798	157.994		1.67749	-62.8736	103.06		0.429178	-1.78507	91.5873
		2.73134	30.6658	63.8417		3.37308	-55.0423	139.506		0.224368	-4.309	90.9035		0.693367	-0.196556	90.1697
		3.11673	-101.212	179.336		1.7542	-107.089	165.553		0.848555	278.931	51.0129		0.582749	54.6293	15.0525
		3.09384	-248.998	124.252		1.1892	122.253	51.1159		3.85108	-455.157	152.029		0.781234	-106.924	132.003
		2.17769	-285.353	175.18		1.10607	139.93	37.8529		2.04723	54.1128	73.1854		0.695213	-103.986	134.338
		3.39313	276.346	20.0202		0.176834	170.182	24.3132		2.45692	-72.0191	107.93		0.755639	36.4332	65.9733
		2.73531	-81.5603	144.393		0.248688	-96.1754	136.976		1.01762	-89.1405	177.559		0.588954	64.9404	73.2659
		1.95523	-466.593	156.813		0.153102	-56.8874	119.949		1.29714	-136.107	152.831		0.839326	40.8503	71.9867
		4.57904	295.936	41.6821		0.359705	-167.547	130.136		5.90991	-497.573	174.956		0.972166	23.9055	78.4771
		2.29977	-158.338	119.376		1.0385	345.919	1.78018		1.47341	188.654	19.3347		0.0900994	-83.8362	138.827
		0.685717	-121.097	144.039		1.10141	301.29	5.65415		4.62903	-136.002	176.993		0.237888	-26.799	107.756
		2.80611	-223.675	156.829		1.00309	317.39	5.47775		2.09007	-63.5364	166.198		0.709617	-52.9632	127.69
		0.345943	-4.31146	93.8727		0.341001	114.402	3.04494		3.45106	104.455	62.4515		0.888543	23.4368	19.0875
		1.81355	-128.666	159.825		1.3689	-297.041	170.707		1.01956	-48.2781	156.329		0.811902	-65.6049	170.28
		1.19421	-206.966	120.366		0.789618	187.798	19.1383		2.46116	150.218	20.6701		0.774899	11.8547	47.2556
		3.23273	310.966	5.77736		0.152073	113.072	48.2152		1.67666	392.67	32.8728		0.701711	-24.3367	161.547
		2.9398	285.129	8.29792		1.23863	-10.2417	104.068		1.87858	165.09	13.5173		0.772147	-12.9926	124.092
		2.95744	69.7159	60.2302		2.71675	-399.968	175.501		1.09651	-12.5507	97.0641		2.46841	274.285	7.26378
		0.591201	31.9691	63.621		0.927647	88.165	13.4044		0.905172	73.9451	68.0572		0.252863	17.3049	70.152
		0.709382	172.195	3.34623		0.166716	-44.3246	101.609		1.90628	-2.11169	91.0765		2.9284	-240.499	134.896
		0.356806	122.586	73.3055		0.267692	102.635	75.0635		3.62918	-383.221	156.956		2.66235	-48.1739	163.826
		2.03571	34.4323	47.4579		0.145919	-91.9905	103.874		0.284892	-113.366	113.917		2.16756	-89.8134	144.94
		2.10555	126.899	7.68254		0.391776	121.52	68.7392		1.21972	-272.845	141.034		2.85947	-235.461	153.429
		2.27493	344.032	6.83403		0.598087	192.22	9.10665		0.725121	392.507	40.0976		1.50985	-61.1648	123.898
		1.43669	231.159	0.751628		0.819191	211.585	3.76626		6.05075	350.487	26.3035		0.611117	-26.0013	142.476
		1.58307	144.517	18.0172		1.74637	194.043	2.15446		2.46096	427.595	18.9082		0.474339	41.4793	57.7394
		1.08129	-4.57562	92.394		1.07019	173.311	1.5737		1.714	-0.110218	90.1418		0.248167	17.4035	58.7528
		1.81817	-287.727	145.657		2.11762	20.4721	28.7158		1.09761	-50.0407	143.668		0.924823	60.358	16.0959
		1.08174	-210.332	161.895		1.32642	-29.059	129.712		1.38334	-18.5831	118.426		0.390981	28.9965	54.7349
		1.97579	299.577	48.8184		0.658239	36.8242	78.2037		0.895421	-35.3415	156.992		0.406928	32.2463	50.3009
		2.90013	143.337	64.5059		0.914026	13.8209	83.8127		2.18411	-58.0744	164.843		0.460502	20.1832	24.7954
		1.28589	-39.6813	97.3787		0.680979	51.7908	72.6922		2.12499	-15.0717	130.257		1.36106	22.2249	83.9184
		1.44454	-298.823	144.961		0.768668	195.168	43.5821		2.98977	-316.63	169.979		0.963366	147.069	4.15001
		1.07355	505.384	2.9763		0.84778	203.007	46.0002		0.834754	-72.1519	125.128		1.19453	58.9573	49.867
		0.156065	272.085	0.739056		0.790048	-60.3305	105.667		1.18036	220.926	38.0904		1.97659	-21.5759	106.854
		0.498612	194.428	6.26893		0.692039	179.179	31.2605		5.15452	-399.081	153.179		2.04785	-412.931	174.636
		3.28356	-194.444	122.938		0.920037	291.044	0.729449		1.65989	116.722	12.1565		1.91609	340.307	7.06162
		3.2386	-51.4716	97.1509		0.766855	172.08	2.1123		1.35064	107.704	31.9766		1.53547	-10.9294	92.5415
		2.34802	-266.84	138.339		0.929206	183.39	3.30418		0.762543	279.497	28.3544		2.06015	-46.5666	109.95
		1.09611	-126.289	131.671		0.692959	128.311	12.5354		2.76578	396.13	3.29589		0.472618	204.256	0.868644
		2.42112	-177.176	128.187		0.514124	176.704	21.9079		0.27905	151.707	67.169		2.45967	109.932	53.8948
		2.33139	-205.229	153.305		1.02535	173.512	4.23396		3.04754	22.6555	86.7734		0.530042	507.373	7.99238
		2.15538	6.68168	71.3505		0.588839	186.536	6.69088		0.322192	-101.248	115.062		1.62658	421.078	1.98747
		2.18497	-81.6022	150.169		0.946917	223.25	1.94735		0.112074	-131.974	158.207		1.42775	228.431	27.7637
		2.98189	65.4912	44.6257		0.361508	-17.8122	104.414		2.24963	352.923	43.914		2.77401	76.7617	43.2189
		0.485274	307.558	43.2866		1.39183	74.4709	25.0906		2.4192	-431.111	169.613		1.80578	-170.924	155.445
		3.04318	274.432	16.392		1.69741	-219.05	176.835		0.381613	-3.37288	90.5865		0.676521	-296.625	169.703
		2.05952	71.654	27.8853		1.48474	321.899	9.27721		1.94896	-368.772	140.705		2.47057	-434.76	169.098
		1.84291	165.874	2.71486		1.61786	195.557	0.188619		0.259916	-293.602	134.211		1.23026	325.931	2.48848
		1.96493	105.276	8.75817		1.05206	-32.4359	103.323		1.70226	-3.36538	90.5996		0.878886	-98.7432	105.294
		1.14549	57.1777	38.397		0.665008	-239.59	137.173		3.21855	-167.9	137.943		0.974373	-90.5718	136.01
		3.6277	145.419	17.7132		0.641178	-279.549	170.356		2.57021	-43.7149	103.387		0.34559	-220.456	173.589
		2.13748	-98.5226	128.069		0.949794	-107.858	156.436		1.32986	-97.693	154.199		0.484917	-33.1524	98.5532
		2.99744	-38.4942	135.634		0.541056	-91.8442	156.03		0.563551	-142.984	179.861		2.85801	-56.6574	113.668
		2.22397	112.553	11.4186		0.24067	177.134	27.2446		2.46014	-161.071	172.793		1.44698	13.3875	86.7232
		1.97585	90.3299	52.7971		0.967501	71.2412	22.6792		0.600856	-95.6447	114.604		0.644941	-191.929	160.598
		0.70147	71.5168	8.75706		0.931183	-66.7568	178.459		4.29697	-453.996	170.558		1.07667	-215.143	174.294
		0.255079	130.335	1.37764		2.10616	160.453	66.9316		1.63884	304.562	26.0063		0.409267	-201.548	123.162
		2.72275	107.723	32.6364		2.59995	-219.959	124.691		0.783303	159.402	1.98709		0.403659	20.3545	85.235
		2.86816	-379.401	157.865		3.69818	-225.005	143.33		5.03288	-354.214	149.691		0.607322	-384.833	150.592
		3.14688	-46.1899	100.411		3.24724	246.98	49.1141		4.69336	367.046	23.6329		1.30418	-18.8522	101.443
		2.66906	216.88	4.32118		0.254235	-14.0013	100.839		0.271779	159.994	60.1296		0.661589	69.4357	69.2596
		2.63039	49.1413	39.7574		0.201806	-46.8138	145.992		1.33316	198.212	44.7248		0.0370498	72.3258	61.4303
		0.520625	79.8999	34.1413		1.32681	98.6136	25.7791		2.8193	-505.537	169.218		0.708177	19.7043	82.4135
		2.2514	33.6197	47.1468		0.521946	7.80595	77.4295		3.08549	-157.08	172.685		0.901961	-103.981	154.266
		3.11459	37.0958	34.5967		1.07625	185.409	9.38502		0.428784	261.528	47.3523		0.993053	-150.92	129.037
		1.89382	-106.796	163.819		0.810479	216.848	9.59461		0.00856155	259.849	53.6465		2.15448	409.003	37.5665
		2.38185	144.799	10.3036		0.872305	390.359	26.4417		5.17943	341.703	12.4605		1.01821	482.966	17.3479
		2.64474	80.8955	32.7948		0.302314	329.601	24.4113		2.00167	-446.313	158.994		0.264494	-155.934	125.856
		3.31601	153.888	14.4331		0.260804	382.16	26.48		1.76382	-123.566	179.757		0.35579	-302.401	167.805
		2.67294	75.911	18.7818		0.787657	406.466	21.7923		2.28176	-249.402	166.539		0.635878	233.225	11.4595
		3.3781	52.9426	65.7423		1.73302	19.052	77.4648		1.67603	-172.729	154.09		0.509168	132.168	2.36796
		2.77462	-41.898	142.832		1.06418	-96.234	162.57		3.10424	-48.4433	101.561		0.331334	71.9707	8.6937
		1.68224	294.694	11.1784		1.39784	-53.1858	176.048		2.45106	-135.345	155.702		0.33689	146.3	28.4022
		1.3416	69.156	80.8902		1.26286	-315.43	172.913		1.2879	398.429	21.6561		0.460619	158.778	8.31699
		0.539362	-348.819	164.284		1.23174	-402.636	168.168		1.8475	263.133	11.5058		0.861229	108.719	17.0045
		3.58807	2.40603	88.3318		0.29383	-427.298	148.664		0.725963	-82.4358	121.216		0.497157	38.6916	41.2182
		1.92626	-348.098	166.594		2.52182	-75.7414	149.774		0.455926	-0.0847572	90.0776		0.773373	18.4299	67.0962
		2.45175	174.357	10.1469		1.16481	-168.232	137.124		3.97626	271.945	11.7159		0.890466	85.7689	37.5613
		2.67043	95.0349	25.1167		0.857937	26.7292	52.8642		0.206158	366.623	10.4724		0.912022	-41.1019	126.048
		2.07866	123.347	42.7863		0.678426	131.36	71.1479		0.903616	174.805	35.6818		1.18442	-30.0501	101.324
		2.65172	261.585	24.2523		1.68303	272.023	37.8995		0.375107	-347.789	162.642		0.431746	-419.541	176.149
		2.4352	96.3721	4.77528		0.546011	10.0793	87.7829		4.25142	-357.999	166.44		0.809755	-329.782	157.401
		2.18218	80.9619	39.1153		0.228793	27.1222	83.8421		0.395707	151.592	70.1878		2.2334	-227.469	140.512
		2.37667	96.7591	18.5164		0.741611	4.35126	89.2439		4.1283	447.601	27.9784		4.21196	-238.374	147.934
		1.81496	70.1279	10.3255		0.900661	-321.402	156.378		2.78537	-381.618	156.733		0.395536	-367.511	164.79
		2.3628	210.87	2.01515		0.673595	-352.548	178.815		1.71464	138.175	44.9482		0.311917	107.722	19.5804
		1.57779	150.024	19.7518		0.0956411	460.446	22.6823		0.638554	-106.266	179.051		1.86367	-474.356	163.397
		1.83949	256.565	60.3706		1.31575	113.366	63.8437		1.75791	-126.429	157.607		0.795941	422.131	15.8163
		1.07349	61.8363	83.0553		1.79473	90.8754	41.9054		1.36852	-126.452	138.789		1.49718	-110.489	116.956
		1.82545	112.907	10.3192		2.10684	72.4155	57.1658		1.50078	-4.05884	91.7919		2.79691	-95.9551	107.245
		1.82542	-21.8758	126.235		1.06369	19.8502	64.1344		0.148714	-20.0002	111.292		0.748204	-42.8645	141.589
		2.14252	-80.7668	145.947		0.645594	62.5862	47.9756		0.162072	99.2183	0.722734		1.53049	-39.375	105.413
		1.59979	22.0336	82.2215		0.576046	49.2529	32.872		0.233588	44.1966	11.4042		1.18851	-172.485	155.492
		1.64349	158.529	46.4457		0.142679	172.464	0.103532		0.560452	128.647	2.64771		0.820834	5.31353	88.2801
		1.17969	68.1426	74.247		0.643038	65.5842	1.70696		0.912734	-32.5763	147.129		0.903213	43.3377	70.1061
		1.19996	142.51	42.0389		1.40406	138.916	5.92035		0.683539	-105.769	169.158		1.5864	72.4261	61.7342
		2.06102	107.691	44.3055		1.54273	26.5203	64.6104		1.48287	-47.2401	152.774		0.714606	-10.4385	94.597
		1.66338	-23.8215	133.704		0.81306	-67.7374	105.463		2.00204	38.2863	19.9577		0.250978	27.1467	78.6056
		3.1889	34.6414	56.2896		0.630954	-52.8993	117.237		0.049444	138.202	44.5965		0.534613	338.511	10.8499
		1.61891	157.988	57.9334		0.747206	-18.6792	132.473		0.624972	203.691	10.3528		3.58853	261.795	12.2537
		1.80428	228.695	51.7529		0.726312	68.3663	18.8296		0.907883	141.543	28.7739		1.33995	165.534	33.5908
		2.3501	22.4576	46.6696		0.282009	221.815	63.7485		0.828663	130.633	17.3054		4.11785	-355.621	150.785
		1.90207	79.1102	10.8355		0.859962	76.6444	12.8082		0.832041	-43.3821	169.627		1.73561	-24.1264	145.237
		1.70257	236.713	21.7684		0.855413	102.378	9.64331		1.30699	-81.079	128.949		0.614385	-82.3157	166.264
		1.95324	186.997	59.3291		0.86698	105.124	16.2718		0.391775	-109.982	169.23		1.40484	-14.5059	103.704
		3.35962	66.7612	0.0923917		0.325132	142.264	21.8968		0.870128	-111.776	161.728		0.764181	-82.1298	171.96
		4.81032	-290.036	133.442		1.06431	260.023	3.90145		1.90944	-102.846	131.822		0.590328	-41.7556	162.873
		2.44995	352.006	12.6418		0.442851	375.409	11.5299		0.636577	-79.6617	149.635		1.37407	181.628	12.592
		2.2955	-206.141	165.333		0.511804	391.569	2.8726		1.95967	-64.361	132.202		0.473722	211.084	44.1631
		0.859876	-169.941	112.843		0.416469	357.692	2.75758		1.39089	-46.4552	161.679		0.699044	137.146	54.9942
		1.96804	173.908	56.2264		0.433224	316.992	23.2106		2.82409	258.29	55.4613		0.807935	334.293	33.4985
		1.58136	123.211	71.3682		0.318047	81.6902	26.8032		1.43893	-186.314	111.493		2.32495	163.351	40.6509
		1.31086	86.1433	75.167		0.868137	178.08	48.3819		2.88788	179.826	66.7696		0.926423	-171.164	134.75
		1.37374	145.066	45.8052		0.470089	49.4909	65.4006		0.809736	-266.693	124.708		1.97406	-91.857	151.256
		1.57292	163.154	23.1957		0.593013	93.8962	42.1468		1.65659	-235.737	146.846		1.38804	270.806	40.3456
		3.24511	-194.812	179.325		0.644803	37.223	66.1537		1.43333	-149.238	138.957		1.26174	148.92	23.1974
		2.8525	334.106	19.0993		0.575049	38.0179	70.2211		2.40164	15.5783	78.0599		1.28082	-30.947	113.151
		4.64174	122.371	64.2089		0.968738	169.071	12.2341		1.33207	138.408	16.0695		0.825071	100.435	58.1237
		0.725611	-153.263	128.446		0.504364	132.99	22.2908		1.31436	125.595	6.67818		0.364254	-14.8037	99.0421
		0.303725	-490.975	166.757		0.36112	151.475	1.95933		1.31401	3.25773	65.4928		2.10639	50.4962	53.8764
		2.27218	93.4946	36.4322		0.448379	148.224	25.0318		1.04418	28.0301	25.2971		0.632508	-18.77	104.095
		3.14698	132.599	22.4502		0.304533	125.671	39.5356		0.513934	40.7518	11.2023		0.723768	-25.8047	93.7808
		2.28514	285.303	6.81833		0.0779258	159.16	28.4693		0.832693	-37.3086	135.005		4.67377	-9.19295	91.0946
		1.35713	199.421	50.9064		0.0813466	111.224	41.6841		1.80084	-58.3364	175.326		1.66025	17.1919	85.245
		2.03714	68.6349	31.2255		2.44642	162.927	2.28494		0.879018	-102.76	131.772		1.28234	-117.395	136.363
		2.99233	252.41	54.267		0.192809	453.19	14.6264		0.591328	-91.716	177.749		1.66041	-148.661	117.835
		0.893331	176.469	60.3305		0.12808	75.2963	59.1517		0.551649	-86.7623	164.168		0.748412	-8.99169	92.1675
		0.726167	-74.2678	156.945		0.880558	-308.237	129.818		0.570299	-91.7418	161.237		0.948061	177.285	21.5404
		2.99104	243.869	13.1064		1.49972	-167.032	156.11		1.26984	-85.9837	173.766		0.990407	172.754	8.6256
		1.05322	107.756	17.6293		0.630957	5.88028	89.2615		0.0123837	-174.439	178.421		1.53582	113.441	4.64606
		2.30962	-41.9665	137.063		1.09577	170.578	65.6821		1.19685	-186.964	175.828		0.868786	48.1421	30.8497
		0.645619	-89.0227	115.132		0.629617	152.188	66.9414		0.361561	84.1502	76.6801		0.781142	-230.444	179.177
		0.912006	78.5516	69.1855		0.642032	43.9639	65.0987		1.58648	-83.3351	117.085		2.57604	-418.99	164.505
		2.04048	104.9	64.2288		0.967349	-93.2195	167.398		0.485206	-143.505	153.939		4.52047	504.411	9.50199
		1.96629	18.4594	85.4107		1.65339	160.208	24.8256		2.28595	-373.031	173.589		1.33888	101.41	64.8961
		2.2206	203.114	15.9933		2.23412	358.349	5.82699		6.23248	-400.526	166.197		0.566087	-105.263	139.498
		1.07452	-61.7413	138.773		5.29214	218.405	52.428		1.2579	504.831	0.0106022		1.77006	248.487	11.7647
		2.1018	-146.254	150.617		0.552911	133.77	60.5839		0.464249	-248.697	170.44		2.55225	387.562	33.8326
		1.77106	-89.9591	117.529		1.8553	323.289	23.277		4.29203	-380.724	164.926		0.66476	212.597	39.5631
		1.52995	33.1116	84.2333		2.18014	49.2204	17.3526		2.03735	-319.593	139.977		1.72727	2.89211	89.4831
		3.25097	-297.345	167.912		0.843818	19.1975	69.9348		2.05546	-58.8611	169.466		3.60323	296.086	26.5745
		2.15782	203.258	33.3471		0.445647	-29.2512	99.1182		1.45385	-131.456	179.789		0.182017	-194.698	175.644
		2.33257	18.5734	77.1181		0.305123	-78.3291	130.033		0.931244	-61.3756	142.4		0.528702	-130.683	122.218
		2.56586	-65.1994	165.094		0.981546	134.168	71.1944		0.465725	-517.132	175.856		0.124358	-208.214	133.56
		2.58167	-412.886	175.546		0.326175	461.778	18.8298		5.3362	-237.015	122.771		0.597581	119.802	62.0267
		4.43625	150.341	73.1658		3.10038	24.7725	86.9932		2.41981	17.1809	44.5273		0.660496	100.903	67.2263
		1.15531	210.745	2.32726		0.85665	323.492	27.1049		3.89446	-125.135	147.66		1.6272	276.351	9.10774
		2.29066	51.4933	62.3857		1.91237	147.436	43.7522		2.12739	44.7084	46.2796		1.64842	-35.9579	139.622
		2.56463	-33.025	112.341		1.3487	36.9861	76.6987		1.03919	-148.414	154.944		1.17968	250.719	20.8769
		0.669241	149.797	71.6206		0.903054	-56.7507	106.344		1.95056	-93.8337	174.673		1.32629	156.988	36.8099
		2.41195	-18.2891	92.1851		0.465434	-76.6224	135.637		2.74995	-222.936	164.928		1.68108	63.5213	63.8049
		0.764902	232.912	2.73459		3.57572	-311.408	166.124		1.20744	-105.1	165.604		1.13189	110.876	55.335
		1.34079	139.082	12.9613		3.07639	-384.083	168.58		1.51224	11.5656	80.1214		1.12565	72.6806	59.7256
		1.16193	111.83	23.6403		3.53498	326.401	42.4857		1.63334	42.7946	58.2055		0.855458	31.1593	73.0994
		0.34916	114.453	23.3824		0.270832	88.1076	32.4879		1.82328	11.6957	52.3852		1.51236	19.5652	79.1328
		3.03751	-105.299	125.982		1.78304	26.6072	80.1719		1.79697	-142.34	142.89		1.76465	-16.1382	96.2089
		1.18899	-482.336	176.018		0.631879	129.517	48.3655		0.983548	-46.326	173.391		0.833891	45.1051	71.3042
		1.2642	-116.673	149.54		0.65303	-297.225	173.68		3.03815	-128.148	149.978		0.729216	-16.9517	96.6001
		0.891507	106.122	3.56949		0.657706	73.3893	78.1629		1.65729	265.795	7.36711		0.967704	-18.8438	101.702
		2.00894	101.848	8.06114		1.21851	28.5939	80.3515		1.01346	-88.151	151.471		0.818072	23.9509	79.0019
		0.532279	439.775	9.78823		1.89872	168.452	60.4513		0.433435	-314.63	138.123		2.56184	-72.8428	110.047
		1.32644	184.167	20.8578		0.393271	432.744	21.3576		0.659255	245.756	12.5657		1.54089	-118.661	125.27
		1.50773	149.1	43.4839		0.473429	12.3405	85.8015		0.295907	34.4631	69.1425		0.771788	-68.6384	128.018
		1.16384	229.452	34.4289		0.335399	27.3847	74.5808		0.547028	195.227	10.0949		0.818865	18.4299	77.9665
		1.28286	160.091	24.9747		0.264338	45.4779	70.3866		0.784987	82.645	63.5361		0.959822	-21.9286	100.779
		0.501308	122.814	23.9705		4.07389	74.6166	81.1228		0.366931	121.855	32.1385		0.680422	-66.0892	112.51
		2.22247	126.798	31.5366		0.584164	102.467	53.0222		3.32135	312.765	14.7681		0.638243	-55.745	107.731
		2.26208	-33.1763	103.179		1.08897	481.374	8.73084		2.73838	-104.688	160.172		0.36672	-4.91574	92.3022
		2.64524	-120.779	158.44		1.58114	25.7983	15.287		1.09444	26.4648	59.8554		0.133553	-25.6419	101.523
		2.55837	-81.1615	140.959		0.729225	54.4214	2.86772		0.846189	-124.67	171.664		1.26244	-26.622	107.228
		1.98353	-120.206	137.851		0.954694	312.631	10.2021		1.7678	3.91689	85.4798		1.21908	26.8862	79.1572
		3.18723	121.544	71.4053		1.14619	108.203	50.2721		0.874915	40.3519	40.6532		1.02734	-5.81226	98.4033
		1.29438	60.4288	64.3443		0.769836	97.3011	50.122		1.86726	-33.8681	108.738		1.50535	99.845	53.5291
		2.42219	70.3422	64.473		0.564996	126.121	2.19154		2.25407	-88.3487	160.583		1.47991	34.4471	36.8658
		0.703737	267.358	43.4926		0.33296	-191.611	169.584		2.04151	-121.634	159.199		1.40692	-211.33	127.42
		0.97253	250.024	44.3292		0.56199	-330.012	178.507		0.896598	-189.426	170.114		0.946708	-260.505	163.043
		2.98567	-405.043	154.563		0.709986	-274.135	151.44		1.50271	-155.263	141.882		3.09623	-354.414	175.832
		1.43337	395.792	3.38725		1.17026	137.534	0.345413		0.828802	-63.505	135.496		1.56601	192.694	56.2359
		0.211506	154.364	59.334		0.384296	169.663	9.89738		1.32576	36.373	26.797		0.954442	-33.0407	160.181
		1.14804	468.9	2.56239		0.546922	266.981	11.8461		0.0529991	-83.3619	148.02		1.18959	-166.816	160.91
		0.285788	333.553	15.1272		0.351683	79.8529	66.6003		0.705971	-175.628	168.95		2.29486	-312.004	172.198
		1.17762	-119.639	124.863		1.14699	164.042	26.9501		0.651585	-57.2467	179.075		0.795526	-16.1152	95.7047
		1.42766	-296.618	160.84		1.01059	162.694	0.850318		0.583101	28.6017	58.5643		0.770476	28.8672	79.0073
		0.476194	-157.586	178.419		5.52695	-281.036	156.203		1.78459	-128.043	166.521		0.419096	-40.8452	113.03
		0.678021	-174.001	161.933		1.01065	126.877	59.2613		1.59955	-63.4078	171.995		0.60741	32.5441	72.4931
		0.345237	-15.2349	147.181		0.16069	31.4742	80.0399		0.88334	-59.7546	127.049		0.196581	-39.1237	108.843
		0.856763	138.943	5.07509		0.753296	-79.2081	113.09		0.468053	3.29221	63.4953		0.490423	41.6257	78.375
		1.83401	9.55464	87.9204		0.744158	298.712	25.0668		0.691465	8.95448	73.2484		0.927232	-27.8626	97.9405
		2.44928	-55.0667	106.182		0.486574	-150.471	128.333		1.88595	-11.5808	132.125		0.841535	-16.9567	95.4234
		2.92806	7.28291	86.7247		1.01433	130.764	26.4011		1.01886	-95.3788	172.899		0.457874	-121.753	119.755
		2.90339	-52.4328	101.249		1.59538	181.953	65.9967		1.22525	-103.285	153.885		0.396426	-100.09	115.206
		3.43048	-316.295	134.05		0.810634	-121.353	149.199		1.01828	184.1	44.8146		0.89675	-195.362	124.235
		2.8391	90.1217	77.7117		0.621873	26.0156	64.4819		0.935437	-177.07	112.17		1.06594	-206.946	139.747
		2.15654	-217.562	119.195		0.295773	-16.8087	121.842		2.97617	-309.437	171.753		1.42616	-152.052	146.218
		2.70803	234.345	15.4427		0.172553	370.336	43.9613		6.23855	-359.952	153.477		1.31885	1.34582	89.431
		2.65662	40.1715	19.8017		0.632604	328.81	42.963		0.861641	272.323	2.35104		0.839032	46.6483	69.2807
		2.40798	-132.73	171.488		0.473411	45.2781	59.9214		1.40186	-41.8477	141.58		0.387189	-4.92308	92.5262
		2.12902	-318.458	155.979		0.910454	-113.325	149.577		0.906402	-323.88	173.108		1.10068	20.5557	78.5408
		1.66985	78.6089	39.8839		0.548437	-56.6473	132.282		1.41282	-167.864	160.955		0.456621	14.7357	83.3116
		2.32052	196.123	11.5943		0.624613	-73.4582	177.673		1.53246	226.279	12.2721		0.431643	-66.94	135.812
		2.17286	-133.554	170.591		0.667224	23.5952	50.0787		1.46152	-58.5922	145.908		0.608943	-203.28	161.74
		2.7459	-220.063	146.881		0.429954	-73.1217	147.216		2.9453	-310.34	175.248		1.32578	-111.897	121.754
		2.7978	325.276	41.5859		0.308745	38.455	30.0002		1.26969	32.677	32.4285		1.27254	-113.59	134.885
		2.04726	-25.1669	96.3591		0.250757	-4.65408	105.825		1.82368	-34.4579	128.982		0.775876	-122.161	146.261
		1.96433	195.683	24.3791		0.234123	-16.4352	125.272		1.7626	-118.681	175.831		0.284194	-160.173	150.281
		2.51699	272.286	21.3119		0.234391	25.1018	82.633		2.06905	-171.989	167.997		0.509622	-168.479	165.043
		0.780095	-5.82688	93.1064		0.351933	-17.6716	99.8285		2.05753	-130.697	174.789		1.47748	24.5723	3.20599
		1.00687	-230.087	125.558		1.24208	-234.463	152.872		0.715917	-200.974	156.892		1.92963	28.2337	34.1485
		2.00277	-100.988	140.65		1.72702	-260.791	148.428		3.2319	-280.458	151.031		1.31385	0.476696	88.9205
		1.33621	406.603	29.2985		3.14027	308.426	16.3744		0.724378	111.619	8.72108		1.01201	-45.591	170.715
		0.476581	324.632	11.0567		2.34797	-9.28001	100.45		0.254605	92.9272	14.2826		0.594181	-84.2514	158.353
		1.60707	395.094	6.00281		0.857065	131.397	25.6243		2.26948	-274.322	161.006		0.287451	13.9847	76.5136
		1.76345	350.723	22.3393		0.580816	257.834	12.9153		1.37141	-50.5846	166.333		0.973255	47.8446	69.5018
		0.629302	172.101	15.7617		0.0362894	234.1	9.30583		0.370765	239.81	2.14479		0.334476	57.7996	79.6063
		2.2516	-31.9455	102.156		0.931483	224.198	17.1317		1.06738	203.272	27.1076		0.491364	232.626	61.085
		1.95611	236.799	56.9334		0.964745	249.559	18.7608		3.57657	452.136	7.48593		5.55681	58.1914	34.6675
		1.12987	-22.9216	109.115		0.724882	109.874	24.2011		4.39632	-394.704	166.458		6.43636	-323.344	174.502
		1.11491	-154.016	159.172		1.32668	81.4209	45.5527		1.39998	-411.728	170.425		2.6524	-300.158	165.8
		1.69473	-148.68	160.352		2.64733	48.8394	29.6283		2.25706	-197.691	179.775		0.574248	-508.156	174.128
		2.14351	102.611	13.5281		1.85668	76.3892	48.1657		0.727439	112.072	13.8387		0.338219	284.487	5.36172
		0.720008	125.714	37.6145		0.582254	95.4408	52.5189		1.05374	130.229	40.4885		2.78123	144.682	11.0724
		0.400429	262.896	51.9887		1.97255	83.7561	31.1317		0.506185	237.521	57.0043		0.979795	57.6023	78.914
		1.38625	-92.3108	103.774		5.98271	-36.8776	103.141		1.90887	466.296	21.0629		1.48989	401.249	31.5503
		2.66936	286.762	14.26		0.478648	-206.83	174.117		0.486501	-394.021	142.569		0.0929783	-48.994	132.789
		1.06735	-214.951	155.495		1.47544	-0.052193	90.0132		1.31574	-449.863	158.491		0.372098	-259.793	148.845
		1.50687	236.403	0.607687		1.17349	12.3134	86.2566		2.09414	3.34272	60.0889		5.28146	-34.6651	113.988
		2.04209	-88.2179	114		0.65179	-106.114	151.975		0.817818	-250.671	148.198		3.88703	174.723	30.4856
		1.24751	319.654	41.0669		4.66584	-225.23	172.179		1.72319	-76.0012	113.935		0.0959581	-128.397	129.175
		0.771979	136.901	62.781		1.20335	202.576	58.6757		1.22552	-188.265	145.966		1.46392	175.834	64.2956
		0.29736	258.761	25.1787		3.6033	-77.7233	161.278		1.72338	279.268	32.1552		0.23498	231.232	25.8539
		0.646299	227.782	37.9376		0.329249	218.303	11.4934		0.531708	291.757	11.2897		2.01618	23.6761	78.3918
		1.20221	77.2957	74.0722		1.15669	182.811	17.2164		1.63325	16.7422	85.9137		1.15265	-39.3235	101.25
		0.786698	58.395	75.9527		0.831792	407.968	20.5672		1.97314	-291.296	145.494		3.16776	-73.5348	103.441
		1.05933	-150.16	121.404		0.565746	-0.379579	90.105		1.10669	12.3036	18.8009		0.739001	167.129	53.7988
		1.00663	-277.083	141.24		0.0571153	-167.903	122.244		1.08906	-299.892	153.751		1.89222	-408.885	172.455
		1.2264	-428.84	160.482		0.153812	-306.047	166.52		2.03957	-339.438	175.312		1.85809	-303.458	144.161
		0.676162	375.904	23.5554		1.02536	27.7755	72.1248		3.50134	-211.517	175.623		0.91585	212.498	56.4521
		1.05876	-16.4246	94.1199		1.1059	93.601	36.0237		1.08727	34.4576	32.2976		0.445539	39.6533	82.9891
		0.677329	-131.791	123.162		1.05301	25.2785	67.4032		2.08432	199.511	51.6346		1.19216	-235.219	142.26
		0.571673	-328.636	167.305		0.31299	234.953	28.0435		0.283923	196.92	8.99796		1.3296	-70.6509	100.979
		0.511008	214.812	51.3924		2.95083	242.563	13.8404		0.124488	309.47	0.165884		1.06593	-61.893	115.718
		0.865721	332.82	13.2128		0.477008	139.894	42.3219		1.38696	200.153	13.6256		1.72694	155.342	38.2251
		0.743263	263.825	42.0054		1.62425	116.364	7.16382		1.66935	-391.529	155.331		0.296594	57.635	75.6613
		0.342916	229.372	27.5657		1.44051	-73.9798	174.657		5.25711	-290.97	145.539		5.55356	279.816	4.85124
		3.44465	90.0436	17.6898		0.519916	-64.1751	142.445		1.1912	-207.436	113.889		1.11143	-113.487	160.909
		1.43385	-123.053	169.145		1.26399	-315.944	169.554		0.172214	-238.049	121.025		1.23334	-345.332	175.866
		1.41971	-314.931	179.696		1.36805	203.921	30.6236		2.12608	-36.8841	113.42		1.01645	-411.783	166.337
		0.526662	-454.681	162.978		1.04137	-503.126	175.754		1.09047	-17.2742	144.349		0.511049	-248.93	151.01
		0.778694	403.848	22.0661		2.77141	444.654	1.19814		2.2226	-189.235	171.145		1.28909	-157.129	158.329
		0.663647	164.468	58.5412		0.852323	36.8225	55.1418		3.74177	-25.9489	122.203		1.28024	-73.442	144.404
		2.75151	11.2485	73.0217		2.11551	325.234	7.07465		0.927909	115.829	54.6577		1.65817	-59.3652	101.674
		2.47045	51.8173	20.8224		1.69243	109.311	1.96615		0.21585	124.869	22.3029		2.20027	-26.548	94.7275
		2.24696	97.542	32.7982		1.74307	79.4691	68.0153		1.10027	-80.4358	114.438		5.84178	-224.991	136.666
		1.87667	-11.2901	98.8505		0.350883	-57.9646	102.905		0.817368	-313.542	149.373		2.90046	330.286	12.8489
		2.54967	5.47069	84.6578		0.465231	33.9126	48.4308		2.27538	-149.038	177.083		2.56278	-366.895	152.711
		2.58671	-40.0986	135.727		0.2307	40.2381	84.6539		0.56714	-228.619	123.447		1.12743	374.254	39.102
		2.54965	-37.4107	138.923		1.43681	168.477	52.9224		0.103353	-199.855	161.254		1.2892	25.4234	83.3645
		2.15464	57.4732	17.5343		2.54556	238.676	21.9263		0.599426	-220.101	173.118		0.330542	119.257	30.505
		1.22274	81.8909	13.4313		1.16577	24.1501	64.6743		0.704622	79.0846	68.1646		1.52072	54.4286	21.785
		1.80583	115.7	32.1078		0.654765	275.344	18.9735		0.347246	-173.47	154.388		1.22595	214.205	62.7554
		1.20067	4.33966	85.2053		0.0532923	220.49	0.871032		4.14412	-151.666	130.216		4.20738	-237.695	133.681
		1.48571	141.492	3.32656		0.700569	86.4574	16.2764		0.727449	-27.1655	116.243		0.788717	-152.768	122.059
		2.05292	114.956	28.3338		0.339184	46.1021	60.7744		0.840284	-50.181	138.488		1.22131	-235.227	129.406
		1.49009	213.019	21.1095		0.26941	162.427	27.3757		5.65481	-256.857	175.615		5.59612	250.988	31.284
		1.42742	125.765	7.9614		0.473004	-28.5653	137.59		1.12848	321.74	28.2068		1.40287	-129.298	111.994
		0.749898	48.5963	6.58095		0.691443	-15.7138	113.728		1.62677	174.911	10.736		0.539295	118.438	59.3591
		0.962311	67.7509	30.3222		1.25519	18.2033	27.6139		0.640906	-124.326	176.542		1.07996	59.8854	73.22
		0.958651	-5.34904	112.731		1.11324	-265.937	159.383		0.742929	-203.839	137.149		1.16946	-164.16	129.292
		0.521683	127.934	23.259		0.686021	185.567	65.8566		1.60241	-78.018	161.681		0.805709	-179.265	119.138
		0.748871	-16.2327	123.495		0.202393	-4.79706	90.7005		2.41065	-194.464	125.551		1.59415	-30.4254	112.132
		2.72286	85.918	61.9023		0.598509	203.117	64.9734		1.43428	511.172	8.69389		0.997086	-17.0997	162.803
		1.23814	-213.861	144.919		3.00964	-206.641	144.533		0.435664	202.896	36.9464		0.741447	-30.6518	119.473
		0.877796	-135.182	110.132		2.08117	67.089	70.6653		0.807088	9.616	87.0188		1.10017	-57.2638	132.617
		0.781883	67.022	80.1929		0.799539	-401.089	176.446		1.28174	9.79127	86.2237		1.02168	-163.033	147.645
		0.898791	-69.3256	98.1819		1.55124	254.667	46.4336		1.85204	-221.89	130.784		1.284	-69.5443	124.084
		0.973639	236.775	61.7922		0.662533	57.1592	77.7909		4.79908	-384.216	141.123		0.514629	-15.7332	102.412
		0.287482	-72.0763	102.526		1.01138	160.325	38.9143		1.19667	191.692	62.3663		1.1349	25.4576	25.2929
		3.18302	-2.52592	91.1504		0.702366	152.587	36.2311		1.34275	-343.907	139.269		0.957871	-52.6303	179.815
		0.875991	-250.152	147.569		0.164154	-95.3778	174.809		1.16738	-464.081	161.504		1.0238	48.3707	77.8927
		1.89819	-405.225	153.866		0.222071	-98.3411	139.176		0.386861	112.773	5.50414		0.840788	23.4461	28.9668
		2.23849	15.0605	66.1798		0.465207	239.011	5.39806		1.13004	159.979	6.97382		0.495565	-1.44492	92.8832
		2.26475	-63.8908	152.837		0.43081	42.3729	72.9981		1.95565	221.96	3.51931		0.663248	2.34028	86.9281
		1.37581	-274.721	125.918		0.470916	358.353	46.3042		0.836548	124.604	8.27166		0.818751	32.5245	14.0795
		0.34893	509.946	7.15471		0.783931	363.859	21.0002		1.11557	10.0179	84.8705		1.88718	78.3877	13.5259
		1.13124	204.063	50.9827		1.98264	490.066	15.9362		2.98993	-204.348	153.039		1.11445	39.1315	38.6362
		1.74532	236.741	23.1848		1.78549	459.688	9.64245		1.47284	159.016	36.1548		1.62534	-94.2413	101.486
		1.31319	60.4903	54.3887		0.686398	164.991	28.1148		2.35207	-46.8634	105.915		2.71293	30.7653	75.2199
		3.25118	89.1752	59.3986		0.441839	27.656	78.9082		0.424055	-114.468	120.52		0.995145	374.522	5.31966
		6.11281	-6.92604	95.6491		5.07372	-4.35492	91.4527		2.4886	-345.553	173.837		1.1989	133.652	18.3352
		1.2992	288.841	17.0998		2.08223	-134.023	165.791		0.741884	123.697	41.2974		1.16555	-4.62448	92.6204
		1.88679	79.6795	35.9147		1.99496	-210.273	175.163		0.884867	-6.68507	92.7692		0.134611	-222.031	165.153
		2.17019	245.99	2.74601		0.136672	-258.489	173.379		0.989721	-214.774	173.056		0.673227	-263.94	175.627
		1.48768	415.809	4.21232		0.508356	-285.593	177.904		2.70193	41.2007	65.1357		1.0192	503.935	12.0614
		1.42473	344.681	6.05044		6.41256	-174.533	137.765		1.46498	-130.027	126.65		1.25351	299.986	40.5727
		2.68932	393.551	6.21894		0.133208	325.994	20.4972		2.73025	-343.958	164.772		0.824639	209.333	51.3519
		1.98554	351.536	3.68351		0.237316	-140.328	116.788		0.213728	-474.37	166.424		0.921811	67.3834	72.0949
		2.30427	193.085	12.0004		0.279701	117.304	70.6851		0.124539	-512.095	172.501		2.41773	13.8757	86.5111
		2.88934	277.429	3.77194		0.509205	8.55734	88.8086		1.1684	-29.7869	94.4116		0.402613	265.988	6.9933
		1.9985	471.372	2.37821		0.363286	-154.751	125.658		1.92083	-222.758	121.425		1.91746	50.5862	10.2208
		1.47397	430.23	3.18706		0.467185	365.962	8.41002		2.66079	-513.722	171.533		1.49368	74.7688	26.6296
		1.08589	306.103	5.99276		0.961785	-488.905	171.232		3.71117	87.111	19.7006		1.88204	100.315	58.838
		2.00812	425.404	0.816744		0.263029	-398.926	147.862		1.77842	-208.096	162.002		0.830391	-465.462	169.9
		2.00976	342.623	4.19033		0.511433	353.623	5.09818		0.123998	7.25517	72.4308		1.62408	250.458	32.999
		2.10228	275.481	7.39357		0.974197	138.8	47.4854		2.01427	120.795	22.0107		1.49075	-179.504	122.972
		2.12374	276.093	3.46724		0.293289	171.524	24.8157		0.506994	463.871	2.28758		1.19085	339.847	11.486
		1.70175	303.603	10.1225		0.663977	152.95	42.1917		1.47027	265.508	42.4162		0.401371	205.957	5.88669
		2.61875	279.911	1.70109		0.409436	-74.3782	115.267		0.398078	-383.226	143.547		0.667751	131.367	10.4152
		2.17955	153.102	6.02172		0.120379	-385.184	152.088		0.571071	-106.234	102.675		1.86551	126.839	21.4725
		1.17057	33.173	83.4296		0.915902	-52.7873	118.178		1.15414	63.4929	48.8649		0.449875	-100.754	168.611
		1.79336	-121.846	106.737		0.892183	234.748	14.3414		1.27966	19.6763	51.1381		2.17639	370.817	10.0035
		3.16652	-385.359	157.142		0.662518	250.647	37.8462		1.38225	69.8928	12.4357		2.14253	79.1358	49.5267
		1.74288	-139.51	125.618		2.07907	135.987	25.9595		1.81676	-32.4329	119.622		0.128452	-484.461	177.127
		0.983167	-128.262	125.555		1.94478	-75.1886	108.808		1.51444	-45.0782	153.133		0.337299	243.78	9.99421
		1.23159	-16.7713	133.438		1.30257	-59.9529	99.6208		1.30763	-12.0597	120.622		2.70348	-162.958	144.961
		2.28728	110.229	36.6485		0.42275	-148.565	178.416		2.27411	-102.799	154.586		1.97048	-65.2343	112.619
		0.394111	106.405	37.2889		0.42438	70.785	60.3457		1.2762	30.5134	63.3402		3.09702	-58.1211	168.985
		2.16036	112.242	36.7487		0.353737	216.588	5.20113		1.14622	-37.8869	147.525		2.70793	-121.319	150.515
		2.82304	-147.459	147.984		0.42677	334.741	6.58076		4.80828	62.627	20.2231		1.4488	108.836	52.0916
		1.42754	31.2952	84.7305		0.502781	186.698	38.2301		0.478072	-337.913	168.762		1.92238	28.6809	76.8367
		1.99014	508.245	8.66309		0.899382	-65.7302	167.265		0.280721	-35.0354	116.958		3.34596	-38.0977	106.988
		1.83457	382.062	1.83101		0.910161	252.167	40.9273		0.418704	-119.38	130.709		3.99675	-45.5886	124.838
		1.94083	386.717	10.4179		0.481913	-117.765	158.062		0.0974934	-83.1472	114.685		2.47182	-72.0545	164.742
		1.52143	267.695	17.7953		1.28036	42.3591	85.0164		1.60333	-146.773	148.626		1.76991	45.797	23.4529
		0.784148	156.935	35.1459		0.974391	263.332	8.24587		0.0748264	29.3415	27.3917		0.61448	-14.6246	109.754
		1.38775	162.638	33.4545		0.2737	84.1764	57.4279		0.0888734	5.30362	61.2774		0.64842	-8.64757	115.871
		0.99292	278.692	22.0319		0.514006	266.073	46.6375		1.91815	-202.555	134.693		0.743358	-0.852193	92.6343
		1.54059	203.508	10.7114		1.32024	326.688	38.341		4.01906	74.3927	27.3385		0.912252	-38.666	179.894
		1.35449	165.863	22.0777		0.985574	354.499	26.7991		2.10474	134.395	24.1421		0.76388	-19.0335	135.113
		0.564943	229.959	12.9815		0.132092	-95.5751	154.955		1.00271	0.130711	89.8862		0.0445675	39.6944	40.2505
		0.808511	255.561	10.7471		1.36888	239.281	34.0394		1.67554	57.3031	17.2586		0.512131	91.187	19.2703
		1.42325	272.715	17.7461		0.670985	182.946	34.9895		1.80938	22.8211	59.7218		0.634719	72.6809	31.6724
		0.384426	256.3	0.253136		0.196827	296.336	7.28062		2.15591	-62.8166	156.176		0.577047	159.194	8.98657
		0.481572	276.485	8.3228		1.86836	376.794	8.2327		1.1491	-83.8469	157.004		0.753922	68.1022	45.4059
		1.89857	32.2888	45.4107		1.65301	327.533	7.33682		0.710097	-174.5	176.671		0.759791	106.588	48.7583
		1.00808	106.144	59.6241		0.417674	189.665	17.9795		1.43592	-8.20347	119.994		0.786819	94.1201	39.341
		0.7646	-12.0802	94.6812		0.121663	94.4804	61.4188		0.978294	-331.464	161.323		0.792088	125.833	44.8895
		1.81639	353.514	3.62813		0.197453	342.29	13.3525		1.65311	-401.562	178.288		0.862946	148.068	46.826
		2.35623	275.515	0.808093		2.79906	163.783	51.8255		5.1248	1.11817	89.7859		1.54219	-9.16395	138.532
		2.16597	322.668	48.6709		1.08462	66.7913	76.3774		4.11455	342.514	33.0078		1.99353	-21.9711	133.371
		2.30768	320.394	9.29843		1.1869	243.756	28.9644		1.86218	-404.807	160.621		1.38386	-0.906572	91.4103
		4.94233	157.519	31.5333		0.946071	-149.284	169.438		0.23062	142.767	60.1087		1.20744	-39.097	178.683
		2.31794	15.634	49.6074		0.45346	40.1052	47.9595		1.45259	133.323	24.2439		1.9345	52.4	14.5548
		3.95166	226.563	4.31503		0.355268	111.341	72.5556		1.92337	90.6794	4.09166		0.493043	-14.9981	156.292
		2.49078	95.1472	56.9619		2.21915	232.029	43.1355		1.17347	36.2101	36.9447		1.24073	21.5197	38.2215
		1.29379	-124.375	142.247		5.55187	-352.697	149.698		1.76961	-163.186	171.771		0.593209	-33.7191	170.07
		0.948464	113.947	8.64967		1.22343	15.3719	83.9042		2.90688	-203.894	146.443		0.459661	-79.0467	162.883
		0.597878	142.17	58.9082		1.47704	158.036	49.7265		0.928003	-34.9248	118.727		0.489469	-114.21	174.058
		1.14003	-279.713	148.062		4.6051	-201.944	123.341		1.37011	-164.851	136.381		0.708223	-129.914	179.416
		0.254505	79.3515	47.0967		0.373925	-75.8804	114.688		1.35718	-151.374	170.298		1.61488	-174.928	176.472
		1.986	-139.903	141.369		1.11281	-237.123	154.44		2.56803	-9.53459	173.09		2.74537	-148.632	150.53
		0.817151	-150.401	141.407		1.62718	221.995	55.1291		2.55047	-44.8875	111.272		1.86227	-98.9701	168.213
		1.17008	395.808	5.03065		2.81096	164.766	38.3748		3.09458	140.087	10.4261		1.18189	-35.5118	140.114
		0.385016	200.694	27.2488		0.364374	24.3762	80.4926		0.491464	139.606	57.5416		1.36517	-16.6192	153.264
		1.08867	187.556	7.89061		2.94253	243.787	3.94312		0.460921	-52.9268	101.504		1.38094	-33.0003	143.743
		2.60931	438.462	2.09729		1.40534	67.4447	33.4264		0.518588	-302.525	142.207		0.714194	-14.0662	118.373
		1.21003	351.894	16.5344		1.93527	279.657	32.921		2.25756	-107.194	130.836		1.33832	16.1294	19.2218
		0.617364	198.975	55.9828		0.444638	136.201	35.9066		1.77224	-331.434	147.953		0.930127	-15.6713	120.273
		1.58559	-77.633	101.238		0.512178	-5.99752	91.4557		4.52439	-386.947	163.152		1.17246	7.9521	48.0353
		1.94686	-18.3218	144.877		0.762404	-125.795	166.318		1.31985	-405.712	143.947		0.32911	-90.4525	109.982
		2.43422	46.0199	52.8493		0.871749	165.196	15.8614		2.34568	323.159	39.2217		1.62231	-203.015	154.148
		5.25864	-144.077	107.66		0.712796	431.382	32.5527		1.24233	4.27506	87.7836		1.0172	-412.476	165.195
		1.28726	162.66	71.1201		0.965293	299.843	40.0759		0.738638	288.838	10.2333		0.826703	70.7014	1.84526
		0.842859	-48.7161	113.177		1.00348	158.353	47.5136		0.437621	150.565	36.165		0.753468	0.848337	87.5277
		1.73356	-0.811501	91.1129		0.60234	0.331677	89.7619		5.04011	-250.712	174.387		0.470407	-8.18593	107.854
		1.9125	30.9697	41.7894		2.11214	346.725	24.5898		1.60579	296.185	47.5659		0.755117	-11.1403	130.676
		1.65125	3.89736	81.4678		1.11327	152.228	3.13601		0.130533	-129.578	128.143		0.397881	-62.7537	149.547
		1.60554	-31.3966	123.675		5.54016	261.141	17.2562		5.18654	120.754	21.8977		0.503378	-29.1439	96.1959
		1.60697	30.586	39.3302		0.827272	-178.809	175.565		0.278479	-58.5109	97.4524		2.57967	-182.355	133.14
		0.738738	-3.20261	121.166		1.57812	340.096	19.0785		1.45896	-270.522	177.97		0.512859	-400.726	166.727
		0.639043	17.8445	33.9104		0.572499	48.9161	78.8501		1.19176	263.816	23.9978		1.19115	-85.3238	111.125
		1.33765	-124.149	164.829		0.718595	77.5914	41.4555		1.48131	123.309	47.8738		2.56263	-211.781	130.882
		1.02706	-10.366	125.959		0.246937	11.2052	79.139		1.45989	-103.988	122.762		1.61991	153.98	18.0777
		0.684719	-20.7015	151.085		1.56183	24.5788	77.925		4.94998	-342.918	145.747		0.413942	19.052	47.8492
		1.07609	97.664	10.4817		1.90787	421.496	28.1288		0.273437	-276.735	152.13		1.05111	23.6008	1.93065
		0.842872	75.8954	3.08274		0.819161	-347.5	170.303		0.24265	-270.66	162.981		0.454461	12.5817	30.2238
		0.665757	43.8529	23.86		4.80952	18.6976	78.8956		0.181189	-162.026	110.604		0.594067	-13.8188	130.804
		1.35812	32.9751	23.1004		1.84084	396.874	7.74692		3.62811	-396.457	155.009		0.998829	52.7135	11.2268
		1.0912	16.7912	18.6626		1.71671	58.5565	58.4647		1.02212	56.0284	70.1387		2.15595	32.9035	4.12595
		0.314126	11.3424	64.9181		0.190953	-84.8959	120.667		1.04625	-124.027	118.004		0.156354	83.4587	14.3388
		0.273924	10.8307	61.8605		1.57161	-378.571	177.818		0.776865	202.791	10.2019		0.701495	149.979	30.6592
		0.674855	40.085	4.0888		0.270695	-267.228	137.576		2.23185	-319.039	178.55		1.46133	-14.5088	95.2809
		0.791048	-1.9107	100.41		1.19692	72.7562	68.3619		5.34184	-275.707	176.439		0.755346	386.093	9.59963
		0.961379	-52.5107	169.002		5.30685	-163.235	116.423		0.2869	-4.13214	93.4688		1.28675	-12.4763	100.907
		1.12064	-1.12567	90.6194		1.27805	86.6073	68.0254		2.84686	-335.71	165.693		2.986	-25.7224	115.969
		1.30915	-34.1032	98.7836		0.548606	7.47691	88.656		1.06381	99.502	22.0246		0.946447	-149.969	142.447
		0.869215	-18.7078	120.033		1.18146	-369.57	145.235		0.836665	-95.2078	137.94		5.95074	366.681	22.7137
		1.29248	-78.3179	109.731		0.695308	49.6896	23.1773		0.595834	268.919	21.1133		2.78535	-36.0657	100.54
		0.780102	-300.074	178.549		0.695026	109.191	14.869		0.483156	73.8743	73.7359		2.60108	150.031	22.0915
		2.1027	-163.547	169.398		0.543293	84.7363	15.6802		2.81728	9.8535	70.0082		1.79717	71.1711	11.719
		2.08072	-166.401	138.791		0.588362	74.642	0.978904		2.60717	-156.822	177.824		1.68246	-88.4267	175.544
		1.27393	193.444	12.3809		1.72189	-358.991	156.273		1.9367	-132.334	143.402		1.26043	-205.126	165.467
		1.19256	148.767	5.19656		4.62557	119.913	7.89354		1.932	-392.564	177.875		1.33261	72.3509	43.1203
		1.2306	84.9149	41.6639		1.21776	-304.224	177.894		2.14964	-154.947	130.139		0.918727	41.4395	77.0851
		0.925394	77.2015	50.7796		0.365904	-271.695	128.783		0.818017	21.0136	59.5327		0.647751	-67.5868	118.108
		0.798963	137.081	35.2881		2.09052	287.081	23.9085		0.343477	-221.91	150.774		0.601681	-203.76	172.315
		0.594576	138.511	22.1		1.39281	114.712	34.6773		0.955148	-268.627	133.772		1.84174	126.241	37.2777
		1.10961	119.763	25.4693		1.48924	56.6734	43.8521		1.01213	22.2172	38.7046		0.755285	25.5398	82.7453
		1.07345	147.556	52.6781		1.05759	53.2263	39.6051		0.954554	-42.629	120.25		1.90618	-26.3381	112.656
		0.966385	71.2625	37.6061		0.524106	0.894518	89.2135		0.741072	-19.9426	121.488		4.92493	258.746	6.19375
		0.632662	39.7107	24.7227		1.93332	83.0227	18.4692		0.981619	-124.826	178.831		0.648084	132.066	35.094
		0.523147	-28.1521	131.968		0.0734837	-125.464	151.456		0.848687	-172.074	148.614		5.39596	-27.5883	109.258
		0.430378	-213.517	122.033		1.11334	-80.4683	151.895		3.17255	-438.371	174.852		1.27967	-23.6296	100.19
		0.348898	-186.363	147.96		1.1573	-33.2265	115.099		0.860633	-58.4148	128.644		1.63753	-230.122	140.655
		0.521693	111.783	25.6412		0.823917	-13.2981	112.056		1.39767	-43.4171	158.351		1.17024	-40.7575	102.832
		0.599875	365.254	5.83094		0.882565	-30.967	160.647		1.17915	-65.4493	115.306		0.604183	-399.366	168.128
		1.68471	263.212	0.0231859		1.25366	-31.3272	156.388		0.274359	335.933	48.2958		0.502197	58.011	76.2065
		3.34054	81.7036	3.57074		0.762267	27.2221	40.4399		1.07813	-303.089	126.533		1.05279	190.313	37.4088
		2.29768	74.6221	28.4082		1.49011	25.843	61.0935		2.83162	-400.523	170.071		0.782261	121.878	16.96
		1.8047	308.673	9.04082		1.50029	-15.4577	114.008		1.1019	226.132	4.03743		0.524175	60.5644	59.7559
		2.40447	421.314	3.51563		0.965971	-3.46972	91.8484		0.855724	74.1789	42.0582		5.8125	-342.257	162.595
		2.10624	190.817	23.4033		0.976073	371.299	23.7649		0.648898	105.427	6.64493		0.273951	24.5353	8.46882
		0.659757	-99.1762	133.752		0.473378	309.786	8.09777		2.95685	-54.8064	107.502		0.77032	71.7583	8.76521
		2.6139	-141.168	179.4		5.87452	194.079	17.8574		0.686484	-45.7808	130.706		1.14839	188.252	30.8512
		1.95833	-140.479	149.339		0.987452	-350.191	157.746		1.92276	283.886	6.77308		1.10657	35.9341	57.808
		1.6686	94.2613	9.80817		0.847222	32.6385	66.3837		1.22507	22.8117	57.3969		0.494308	21.6235	77.6213
		1.49004	177.491	12.6675		0.697179	217.062	15.7199		0.620745	108.798	14.1025		3.7413	-83.7354	112.629
		1.48908	320.149	18.3733		1.41812	-101.886	137.444		0.766707	65.2676	41.858		5.69789	188.834	8.0294
		1.58382	350.268	1.35864		0.889327	-17.6107	179.98		0.212959	11.7283	84.52		0.77782	0.566334	89.1863
		1.04887	86.5872	27.6306		0.191267	79.4796	72.1218		0.872552	384.374	25.5682		0.887219	-16.9158	113.836
		0.643499	25.9879	66.837		0.553979	4.98222	88.9148		1.03644	-297.353	127.658		1.37411	-31.0307	124.198
		1.04777	297.511	13.5873		0.811776	89.6537	73.1461		0.666914	168.575	63.4322		1.52976	-41.1287	127.643
		2.16973	297.67	45.1178		0.194575	-39.2495	100.391		0.831085	-303.036	177.937		2.43897	29.3022	66.8345
		2.08591	-128.218	145.675		0.559696	381.077	27.2745		0.896621	-219.731	159.484		0.710894	101.107	35.3368
		1.81966	-134.775	142.582		1.45842	-258.652	172.81		2.6938	-409.715	175.382		4.16534	45.1026	56.107
		2.40764	122.882	25.8832		2.00869	201.034	3.17896		3.23444	0.840111	89.6288		2.6587	-9.21466	139.163
		0.816435	26.0677	86.9135		1.45337	241.99	41.2223		1.69735	392.26	31.1574		1.76504	0.569688	80.8535
		0.443985	-60.3137	112.426		3.12657	515.112	7.77803		3.44833	-331.417	163.905		2.43264	3.47656	82.6305
		0.880819	-157.186	131.459		1.111	145.698	0.0692145		0.915207	-164.984	138.499		0.850999	39.396	61.0953
		0.643985	-171.972	133.481		5.37891	184.659	16.0112		1.17852	-179.471	152.648		1.48637	31.5751	56.9159
		1.13597	-188.438	163.502		6.25065	400.431	5.63496		1.70576	-83.4349	175.014		1.4115	-0.865797	91.4949
		1.8197	-340.743	159.451		1.1525	-178.773	159.893		2.36693	-133.202	179.499		0.758448	-29.932	117.639
		0.379118	41.4013	61.885		1.28002	-83.9338	104.557		1.47036	-148.187	178.055		1.73641	-50.1209	171.852
		0.970225	233.591	6.95785		1.09597	-424.629	177.854		1.19866	-337.529	173.066		1.04742	50.2778	49.456
		1.81464	-357.049	177.699		0.686496	65.8604	75.8569		0.403529	-11.1101	96.1531		0.693689	118.242	1.57286
		1.49982	-461.674	170.535		0.806269	5.77879	88.8464		0.384839	198.81	1.12395		2.82174	327.696	22.9619
		1.02662	493.536	2.24734		0.49775	35.7439	82.9056		0.950222	352.629	28.5793		4.35629	181.189	46.1986
		0.542101	138.93	1.34938		0.386131	80.4985	74.927		5.2234	252.668	11.3718		1.66256	-232.255	118.35
		1.52619	-417.459	168.569		0.432612	82.5541	48.0428		2.45541	-436.161	178.328		0.853863	117.376	41.5031
		1.07626	255.419	12.2136		0.351085	40.9487	79.4639		1.82729	92.9918	79.1238		3.06328	75.9088	57.2878
		1.92636	191.304	20.7553		0.165293	25.4308	15.7751		1.5933	36.0019	61.0824		2.07479	-106.242	107.753
		1.86634	169.117	20.1422		1.35996	194.137	29.6485		0.879685	64.0117	66.1485		1.67792	19.9563	51.7681
		1.07026	45.1359	58.7446		0.455829	29.7601	78.7718		1.10108	-0.213609	90.2911		1.12538	-308.213	126.971
		1.26491	0.992163	89.3559		0.814597	197.697	15.3357		1.37387	14.1357	84.6675		2.37699	177.76	9.66336
		2.16811	159.015	29.1017		1.00602	154.635	13.7926		4.09954	-30.9049	119.671		0.883927	107.813	47.9596
		1.87174	115.138	65.8692		0.807379	103.443	2.78677		1.4513	145.489	11.3573		5.19958	-314.319	170.196
		2.51334	385.258	15.1724		0.736194	179.374	10.8244		1.98088	55.4927	71.5607		0.314919	-279.23	126.822
		0.598706	91.4542	57.4969		1.52568	91.5663	32.1996		1.00839	150.624	42.4774		1.34415	378.297	40.8263
		0.473893	-57.5453	114.637		1.80163	254.295	17.3967		0.947446	99.1395	31.3954		0.938548	229.127	12.8164
		1.2161	6.18814	87.7059		1.20518	389.326	8.38192		2.47352	-209.456	134.91		0.549176	319.5	30.3425
		0.830242	114.281	37.3116		1.78811	10.2973	86.0485		2.21666	318.197	8.15261		3.90912	187.311	37.9187
		1.06029	14.6054	70.4567		1.52022	-57.9527	176.849		0.11348	-137.166	166.019		2.82018	-441.427	153.969
		1.79053	128.295	20.1181		0.304951	46.5255	17.7216		0.344737	-88.5789	134.922		1.53487	239.411	24.1964
		0.742367	-112.625	155.426		1.22614	127.768	11.2674		0.932838	-273.741	171.972		2.23971	165.969	22.4896
		1.91143	-23.5814	149.206		0.766105	49.7285	53.7295		1.39584	-298.934	171.4		1.63878	-456.413	159.011
		2.3012	-66.2536	173.293		0.211543	33.2796	39.5369		3.0695	241.307	19.5066		0.712651	420.439	8.71707
		1.43756	-101.643	136.553		0.907619	82.0597	22.2836		1.95245	-250.698	168.457		2.83154	-162.838	174.304
		0.921196	163.458	30.1576		0.82957	25.9689	67.9356		2.21518	-469.612	165.409		2.69334	289.108	20.0899
		1.06564	89.1779	72.8091		0.627165	26.1769	81.5952		2.16013	28.9821	63.8142		0.980999	-38.6661	143.686
		1.06641	-86.1516	128.777		0.79097	-93.2348	126.784		2.41161	-42.5793	127.296		1.34096	-240.074	179.423
		1.75858	-272.371	179.995		0.247207	-182.879	142.667		1.80431	-79.3509	133.93		1.26155	-199.072	168.883
		0.944673	-466.346	176.278		0.457754	-279.884	155.291		0.533468	-396.869	156.482		0.791674	338.823	26.0015
		1.58936	44.8423	50.0332		0.435634	56.5402	70.4978		0.876268	-369.471	136.375		1.00475	202.623	23.5496
		1.02269	88.0489	45.2344		0.754741	12.9679	46.5941		1.36947	-127.623	106.581		2.77387	225.19	29.3149
		1.48372	143.268	27.3131		0.689442	44.8413	38.4087		0.130779	-257.925	152.863		1.81225	37.0164	55.7094
		0.894922	197.044	10.2367		1.19888	-76.4384	148.784		2.60905	150.999	16.2725		0.436355	-221.028	136.274
		1.37934	108.205	38.4955		1.69287	172.036	7.94435		1.62999	206.161	19.831		1.07712	-263.404	136.249
		0.550626	184.669	39.6338		1.26927	-461.944	165.281		0.960572	10.4638	17.2458		1.32836	-35.807	106.029
		1.03775	261.773	25.2088		0.353959	51.4883	56.715		1.84856	-467.638	166.663		0.772824	93.8529	34.727
		0.344412	159.946	17.5043		1.34746	83.3792	22.4374		0.998544	13.7133	87.5663		0.964461	-2.45909	91.2404
		1.01192	283.151	0.569591		1.57922	-64.8294	176.179		0.461223	130.994	47.585		1.29409	-302.978	144.753
		0.370904	148.283	39.3599		0.921448	59.5751	53.7066		1.26895	109.833	37.7959		2.12843	192.579	67.1672
		0.221075	210.563	1.36252		0.891907	-58.6337	116.406		1.80186	2.36402	86.1435		1.05393	155.762	45.2286
		0.626679	295.805	44.8935		0.135811	-166.824	111.711		2.34239	-55.3739	122.809		0.980045	-110.867	141.354
		0.79087	449.514	12.7672		1.12663	-126.093	104.327		0.33714	-24.705	124.136		0.495484	-320.468	164.814
		0.102249	297.191	23.4906		1.7429	400.528	25.4376		1.19861	-90.3378	176.728		0.993927	76.9959	25.597
		1.52165	223.903	36.7658		2.41455	76.5435	77.1016		2.2378	-65.5234	130.867		0.445668	-24.7402	119.214
		0.430056	-76.7008	103.004		1.23817	32.1223	65.9181		2.18271	-155.307	151.013		6.20045	-235.56	157.721
		0.525608	262.92	53.6331		0.914855	-14.2068	127.081		1.00466	-168.505	157.231		0.338313	-29.8596	164.788
		1.23346	-46.8798	160.299		0.0737192	144.175	48.4233		0.635989	137.579	61.1923		0.651603	-66.1876	134.121
		2.14772	42.1088	38.0383		0.938675	-65.3013	99.7417		0.794625	83.8319	6.3624		0.866483	-75.9752	133.861
		1.36181	17.2993	70.3766		1.89368	-253.652	161.454		0.7543	-491.345	178.038		0.958258	290.076	52.883
		3.43825	199.27	23.0692		0.0496331	340.47	27.8615		5.13432	120.454	40.7759		0.629454	-152.415	166.765
		2.68413	-45.535	109.836		0.453336	351.738	32.3102		0.431547	-11.3863	92.9777		0.448448	-108.827	153.976
		1.87842	-182.676	164.78		1.20897	-277.738	129.843		1.43463	192.127	46.1591		0.282628	-255.007	169.155
		1.39508	-224.858	162.751		0.545923	249.756	23.3011		2.9261	395.254	28.8612		0.403271	-355.889	164.167
		1.0887	-316.659	162.174		0.54682	379.859	1.07789		3.47309	-452.871	165.017		0.280792	112.584	76.1448
		0.164997	361.453	6.20023		0.352796	104.839	15.1628		2.20033	499.4	7.29206		4.23962	-34.0264	123.963
		5.8051	347.558	14.7065		3.49439	233.679	3.6187		2.44061	490.677	1.58212		2.99016	-380.813	161.754
		1.41965	-198.14	155.88		1.39037	307.374	7.60561		3.08882	-135.941	109.427		2.27928	343.046	23.1912
		1.11946	-40.8944	123.173		0.754715	294.059	1.33988		0.676506	-266.812	139.187		4.2309	-1.88885	91.6215
		0.895026	1.86006	85.8211		0.683881	427.022	32.8067		5.50488	366.7	21.5273		3.87776	-379.19	148.147
		0.457809	-181.454	163.837		1.68492	432.835	27.5028		0.896537	321.619	31.9034		0.759524	124.713	20.414
		1.70712	245.071	51.2461		1.66536	321.777	23.5084		0.949028	-130.415	123.73		5.67053	-66.8175	115.394
		5.36146	503.728	0.0155955		0.67212	151.634	47.4997		2.81781	-255.227	130.481		4.51405	61.2924	37.8463
		2.88979	245.999	2.82529		1.23992	-48.6098	119.272		0.527706	-217.601	159.667		0.327324	141.888	17.881
		2.81457	45.209	12.2339		0.875033	-175.037	164.668		0.826756	-111.048	177.481		5.74806	194.078	29.5072
		2.5428	-12.7369	102.468		0.417251	69.8418	43.022		0.862443	-22.6411	96.6491		6.03973	-366.766	144.59
		1.26108	128.673	42.8298		0.71496	-31.7547	141.656		0.310675	269.387	16.4117		1.02787	258.74	19.947
		2.88724	92.5349	45.5977		1.02428	222.89	50.0368		0.977372	-46.4469	166.51		0.719036	78.0991	61.9867
		1.64935	3.22452	80.4654		1.02668	237.718	54.0972		1.00742	-87.4013	154.178		0.690741	-3.82777	91.0903
		1.916	26.1839	62.8679		1.11853	-103.221	107.071		1.58782	-53.6177	115.947		0.4342	36.6024	82.2748
		2.69227	-4.78507	93.0494		0.386993	-139.96	105.674		2.66689	-227.171	170.738		1.42605	45.772	78.3384
		2.37547	-207.78	117.314		0.234553	-88.535	143.514		1.52075	171.358	33.3537		1.65081	-52.3942	103.075
		0.704611	-149.973	135.138		0.726746	4.00161	89.3368		2.18566	-127.482	147.493		1.13089	52.3882	68.1621
		2.10058	232.055	4.4268		3.0586	-250.072	124.561		1.26308	-180.841	166.453		1.40816	4.83656	85.2696
		3.43672	78.1271	10.2312		1.20794	216.302	46.581		2.18379	-120.784	175.464		1.06159	-37.1892	125.517
		1.73549	-70.0459	177.671		1.33387	15.6194	84.0481		1.43377	21.0868	39.8592		1.42792	-58.8566	174.123
		1.42645	45.1614	42.23		1.38865	39.7468	66.063		3.29911	141.347	28.5958		0.61567	-94.9063	162.64
		1.33878	258.453	1.32117		0.901902	278.276	9.73106		1.56509	-71.0067	122.754		1.12449	10.8651	76.702
		3.33354	316.291	52.5132		1.88594	-175.836	149.794		1.31561	-18.9109	103.345		0.630212	-0.977068	99.2361
		2.67233	-304.306	135.267		0.7589	-132.318	168.515		3.15845	165.471	27.0617		1.04008	0.72596	89.5288
		3.10606	232.534	3.85982		1.8228	-56.116	126.496		2.01825	-253.944	169.342		1.43276	-102.72	115.301
		2.07029	475.973	11.0471		1.4038	-346.826	176.324		2.02801	-208.245	170.552		1.39359	-130.172	168.178
		1.84942	255.668	26.7202		1.07979	136.414	32.1403		1.79264	-99.0924	176.961		3.78298	-149.322	132.314
		1.49675	-76.9764	119.564		0.675994	408.153	14.5331		1.76145	-102.977	169.058		5.22282	-481.602	169.543
		1.88981	126.719	59.7505		3.19074	256.412	37.4523		5.32538	-65.8709	118.849		2.1623	361.166	33.5434
		1.93299	-91.1996	105.85		3.06257	-180.698	129.318		2.39778	-179.585	134.996		1.14599	284.814	25.9749
		1.71417	301.813	27.2868		0.816716	-105.181	168.655		1.30341	-106.071	156.311		1.12412	251.293	14.7958
		1.04418	244.535	55.8441		0.500483	-482.553	174.506		3.25706	293.879	55.1255		1.96338	-254.807	178.181
		1.17778	338.46	5.20935		0.330741	-273.131	157.967		1.30194	-117.8	105.182		3.72243	-429.186	173.735
		3.13629	347.12	32.1214		0.475483	158.384	2.62133		2.64278	500.762	3.74205		0.949615	-10.1442	179.98
		2.18387	36.9504	73.4871		1.64417	351.207	12.5845		0.415663	268.476	32.1305		0.175758	64.3216	35.6913
		1.78983	-311.531	164.728		1.57196	-11.6505	96.2231		0.668442	216.596	15.4817		2.20026	57.6064	16.122
		1.25279	-52.0122	100.22		0.484415	76.5847	5.504		0.756535	-467.138	163.653		3.61621	-277.117	137.27
		1.6663	-171.672	110.027		0.213313	73.9461	65.784		1.57833	-128.467	116.352		4.33237	144.342	71.9503
		2.60376	300.208	50.3937		0.107084	124.446	37.6978		2.18521	-17.7325	96.9959		2.54296	56.3538	81.5016
		3.47656	368.244	6.95744		0.0913259	21.997	84.615		0.901662	-511.466	171.573		3.23071	432.303	0.670288
		3.27861	83.2285	6.31442		0.0854157	126.817	12.7991		0.339592	-304.715	166.62		1.28592	-143.467	174.236
		0.63644	42.6749	68.3553		0.247438	-60.7751	129.633		6.30598	-225.393	115.989		1.52735	36.2914	79.0261
		5.10726	185.849	16.2146		2.37131	241.852	8.62955		5.4453	-261.217	174.539		1.11015	195.62	17.6208
		0.730425	-159.429	109.676		2.24696	69.1047	19.3732		0.942272	-63.6723	178.89		3.31433	424.37	8.35642
		0.480566	-72.2207	116.646		0.742253	290.213	16.9979		2.7943	-65.0336	154.058		1.31038	6.73125	87.589
		1.5238	-280.285	134.685		1.17848	-388.96	169.903		0.298522	-142.003	110.696		2.37565	128.46	51.5845
		1.97188	336.076	13.3216		0.820741	-243.706	126.217		0.503168	13.5592	88.186		2.10134	-146.406	134.907
		1.4271	151.997	20.7197		4.38387	-136.27	157.361		1.7912	412.633	34.8103		1.37093	188.404	43.4443
		1.50952	153.108	10.9813		0.662597	-416.148	171.18		1.61157	298.041	7.73525		2.40547	157.045	45.8285
		1.45698	358.553	7.35224		5.54667	137.415	67.5311		2.68062	-195.188	171.388		2.35838	53.8724	57.1908
		1.65812	159.971	25.7705		0.142952	275.352	43.3035		2.99568	180.534	52.0617		0.311008	97.1086	16.808
		2.82839	-225.831	139.501		0.165995	458.725	20.8207		0.929868	-501.777	167.142		0.473846	85.024	45.152
		2.24742	119.82	49.9444		2.89219	359.887	22.6292		0.223866	362.109	1.91432		1.31215	44.7369	48.639
		2.05511	22.49	73.9395		0.600552	326.354	15.3559		1.36928	-3.54563	91.2586		0.53587	40.5953	62.5383
		3.37458	182.683	35.3316		2.7492	288.369	7.3283		3.05635	481.929	7.81038		1.55979	95.1181	31.43
		2.18655	-151.275	159.071		0.801859	175.253	6.39652		6.03559	-286.328	146.791		1.73618	-59.5175	146.003
		4.33874	-326.919	178.646		0.742609	189.475	18.9225		0.875473	362.46	1.88125		1.73281	-169.523	161.69
		1.61531	239.332	7.2511		2.03289	410.972	7.53052		1.2613	-390.715	163.436		0.292338	-62.4514	147.783
		0.81154	-327.25	149.938		0.513309	17.676	65.4533		0.204276	-143.367	140.913		2.41335	-82.0719	124.828
		0.979246	-94.0083	146.147		0.270081	-2.4215	91.8048		0.587548	-135.014	143.856		1.39317	-99.9058	116.871
		1.24572	-114.041	135.565		0.0968751	55.5719	68.6877		0.843564	-17.5026	109.689		1.49007	-276.134	136.892
		0.761707	33.3634	77.3476		0.467687	33.888	64.7335		0.342918	10.2139	33.3836		1.1882	-271.048	123.478
		0.830062	-120.638	104.447		0.144214	-89.7607	113.565		0.442507	-110.741	142.592		1.60916	-282.863	178.361
		2.47746	268.193	9.78199		0.662827	-316.631	137.631		0.853123	-203.738	174.277		1.07165	-275.099	136.309
		1.89293	53.3322	47.5567		0.273732	88.7613	38.7096		1.13125	-106.324	135.367		1.93803	204.458	18.9583
		2.93067	-297.022	145.1		1.65845	61.7896	46.9376		1.5336	-183.172	157.734		0.695514	26.7191	76.229
		0.585306	326.387	24.2535		0.231446	124.401	39.3613		1.7017	-171.384	155.593		1.09627	81.5454	29.8544
		1.38146	-199.237	178.333		0.54703	159.495	15.9316		0.149451	5.47293	83.4561		0.255719	-285.14	168.483
		1.64055	27.8183	83.7083		0.733777	-199.288	172.199		1.5945	-37.7165	106.707		1.22297	-267.831	172.532
		0.153977	-376.441	148.451		1.82578	338.618	8.38737		0.371699	11.6739	87.4399		0.250211	160.711	30.8904
		1.64842	44.97	78.1468		1.24831	-104.242	140.98		1.95328	130.143	21.1837		1.18327	-6.77679	92.8464
		2.46193	-63.458	99.5747		0.508221	-129.998	130.494		1.52797	67.6775	13.3864		1.35322	193.393	31.7202
		1.5273	-302.274	130.811		0.318105	-34.1496	97.6966		1.32543	-78.8675	147.632		1.01847	49.081	55.0268
		1.1686	269.243	48.3833		0.567083	137.491	3.82679		1.5866	-316.564	179.313		5.28165	272.593	16.007
		2.26684	337.097	31.5104		0.721383	-122.767	151.439		0.49346	-61.9552	145.303		0.411183	-128.249	120.527
		2.3936	201.789	46.597		0.810073	-184.537	175.905		1.49959	-163.759	158.558		0.668073	100.392	27.4495
		1.50197	72.8909	11.9521		0.875005	-273.908	179.819		1.86538	92.9876	3.60398		1.01443	27.7673	65.3628
		1.82375	-150.551	112.757		1.72487	-1.68088	125.062		1.23981	-142.688	174.485		0.3975	80.528	62.8578
		2.09421	73.2997	59.1373		1.83784	-104.418	150.728		0.799445	-222.92	165.314		1.9865	66.1232	61.8434
		1.07995	75.1425	64.6073		3.07072	142.284	73.6985		0.0881507	-8.09528	92.9977		2.15771	4.86812	86.7953
		1.19834	19.6522	84.5301		0.445645	182.32	65.4936		0.286929	68.9276	65.5181		1.37164	-78.8991	141.613
		2.21979	45.2797	79.9615		1.77167	93.4284	39.8466		0.448214	-212.806	125.266		1.22464	-83.0879	125.482
		1.76388	-141.728	142.211		1.15732	80.2025	22.6198		2.24891	-271.331	169.516		0.779925	-15.4905	106.168
		1.49324	-22.5809	114.743		0.775642	103.661	26.1889		0.76055	-225.755	148.742		0.291352	4.51825	14.8937
		1.4507	101.321	64.5644		0.391791	-217.784	147.083		0.450785	101.18	59.68		0.560418	-22.2763	141.499
		0.370132	90.8809	58.2825		0.984157	-207.014	118.582		1.79789	191.464	57.8949		0.292644	-39.5677	145.506
		0.529983	168.169	39.6703		0.175376	-105.22	119.653		0.752417	242.102	46.4898		1.34995	-23.7601	116.657
		2.74487	173.139	17.9669		0.855245	128.748	35.4561		2.75294	-441.112	164.238		1.29675	-60.5976	152.788
		1.96496	302.656	21.1791		0.837416	227.902	45.4671		1.38709	231.417	20.5284		0.256176	27.9072	44.1939
		1.28689	-290.24	157.121		1.15253	-230.226	159.736		1.67148	1.21085	89.1728		0.860355	39.704	40.5989
		1.39607	-388.849	177.64		1.8235	-162.465	137.789		2.56018	27.4035	14.1237		0.605231	0.701611	88.2958
		0.453365	89.1106	77.7276		0.125248	64.5772	63.9588		1.36348	286.493	47.6775		0.0715878	-25.0253	144.401
		0.345348	134.534	56.9005		0.250655	-42.69	176.527		1.56847	431.206	5.74303		0.18446	4.4397	73.6024
		2.05864	35.9256	85.7565		0.933738	12.3133	68.9187		2.3646	63.3034	24.7496		0.449362	-9.81206	115.739
		2.33755	218.953	46.6179		2.20015	-92.4379	158.434		0.520152	259.776	45.5914		0.462524	-34.025	133.032
		0.7313	-271.912	159.673		0.846542	20.605	26.8296		0.691471	-122.676	138.212		0.293232	-15.1102	125.339
		0.9883	-86.1212	100.093		1.30617	387.475	21.8198		1.64142	-142.127	127.277		0.261595	-21.489	136.813
		0.727648	-320.745	164.613		0.200625	285.426	31.7995		0.348453	-254.694	173.052		0.0118428	-35.0928	138.916
		0.782545	-214.214	122.023		0.827622	361.776	35.0696		1.36159	-492.625	178.134		1.15301	-20.0863	142.943
		0.961352	284.487	50.177		1.66628	346.209	28.6953		0.737658	-96.7845	145.039		1.15304	-7.21835	103.681
		1.06843	208.897	32.7798		0.458387	73.4136	73.6207		0.902016	-156.786	171.932		0.609062	-31.0799	172.206
		1.6821	121.898	61.2422		0.604103	217.044	30.6225		1.31031	-10.8391	93.344		1.3349	-56.1293	164.352
		1.58391	-120.758	129.917		0.253613	115.203	9.8913		1.46274	-96.7522	178.561		1.91681	-44.6316	173.418
		0.743232	-274.8	163.598		1.1015	125.765	18.5371		0.389493	-278.585	169.304		0.622172	-79.5354	155.864
		0.819526	421.484	33.16		0.563248	140.412	4.91471		3.70557	-332.711	155.059		0.692607	-45.7339	128.796
		0.671016	201.451	1.55052		0.555999	120.487	5.91121		3.23007	-229.325	179.689		0.850977	-47.9302	178.23
		1.15838	204.287	38.5017		0.0838	163.197	43.268		1.99432	133.599	13.2318		0.557245	-17.7865	102.95
		1.14372	220.98	19.3612		0.381982	205.347	11.2813		0.497544	-41.5529	106.649		0.9447	19.6216	75.9689
		2.39545	153.998	42.6816		0.137042	282.599	4.68118		1.73629	-30.3472	175.217		1.47912	-7.32915	97.1508
		2.41845	45.4448	79.3747		0.842649	31.6918	39.3656		3.45386	-132.171	132.372		2.39745	-82.1873	133.301
		1.34814	-130.487	148.97		1.23724	6.42916	84.8785		2.68708	-1.93538	92.8399		0.796421	-134.843	139.192
		2.03797	44.0853	15.3929		0.799311	-260.087	143.085		2.72765	-9.79053	93.8671		1.14007	54.3789	40.188
		1.63287	-76.3277	121.634		0.78063	-195.282	174.821		2.22517	-123.951	169.889		0.204168	-20.9866	121.328
		1.54281	198.763	28.838		0.572606	1.61272	87.0274		2.21847	-97.3019	138.354		0.484613	-17.1282	118.991
		0.908399	-62.556	115.712		0.837456	27.8148	51.8707		0.637808	-47.9319	110.205		0.924041	-13.0332	106.655
		0.417965	-160.474	126.94		0.0524368	-23.1124	175.038		1.84548	154.984	22.3854		2.18717	41.2393	10.2771
		3.18559	281.869	3.42692		1.25071	83.6702	64.3394		2.78449	148.815	69.2072		2.05121	75.4623	45.8153
		1.48701	94.2578	68.2274		0.205913	373.496	5.78372		1.30748	-190.414	155.311		1.26736	2.67306	87.8246
		1.94819	-17.0526	104.183		0.829563	348.79	15.6626		1.01363	434.013	27.5738		1.28903	-9.25507	104.538
		0.924115	-113.096	136.089		3.26003	4.39136	88.9047		0.20483	11.8313	88.4367		1.78181	-9.52955	98.369
		0.324534	-211.645	168.994		6.23636	-149.958	107.573		2.01753	127.198	61.8683		1.58671	-14.2541	95.9948
		1.0687	79.4178	20.3607		0.811675	389.253	35.5958		0.91996	151.232	53.1067		1.65888	-213.357	142.634
		0.738894	74.8937	15.5781		0.645366	-311.475	159.904		1.02395	204.036	51.7326		1.67109	-137.839	169.649
		1.17953	169.791	23.6153		2.33194	-318.07	174.805		0.370523	1.98624	68.7722		0.9325	-29.2986	126.886
		1.53435	138.54	9.27577		1.5844	-177.609	163.818		1.34934	-96.7835	103.733		0.411023	-54.3506	159.529
		0.95951	46.6459	73.6445		1.09882	-395.197	153.192		2.85849	-218.431	156.05		0.628362	-50.2639	169.213
		0.250802	-41.9178	100.331		2.03074	222.934	27.9134		1.99227	-11.8039	170.083		0.988065	-41.392	149.498
[truncated: 53,132 more rows]
