# Supplementary material for: Concerted action of kinesins KIF5B and KIF13B promotes efficient secretory vesicle transport to microtubule plus ends
Source: eLife. 2020 Nov 11;9:e61302. doi: 10.7554/eLife.61302 (PMC7710357; doi:10.7554/eLife.61302)
Supplement: Figure 6—source data 1. [file elife-61302-fig6-data1.xlsx]

## Sheet: Figure 6C
Figure 6C
(Fold change)
		Control	4X-KO
		5.78903	8.04802
		3.29289	5.01758
		2.92999	3.44709
		3.44628	3.95868

## Sheet: Figure 6D
Figure 6D
(Fold change)
		Control	4X-KO
		0.437958	0.416805
		0.461501	0.430221
		0.436163	0.4632
		0.500623	0.458015

## Sheet: Figure 6F
Figure 6F
(Number of vesicles /mm2/50 s)
		Control	4X-KO
		1.5954	0.4125
		1.157	0.3389
		1.0556	0.1866
		0.7422	0.4556
		1.3162	0.5416
		0.6875	0.5612
		0.4222	0.3327
		1.0086	0.3733
		0.4921	2.054
		0.9713	0.4844
		0.8957	0.9188
		0.1023	1.0486
		0.9349	0.8439
		0.2041	0.618
		0.4446	0.9249
		0.7735	0.8328
		1.1172	0.3503
		0.1259	0.5637
		0.6533	0.3645
		0.5368	0.2154

## Sheet: Figure 6G
Figure 6G
		Control					4X-KO
			Histogram					Histogram
		Distance from Golgi (µm)	Bin Center	%			Distance from Golgi (µm)	Bin Center	%
		3.6067	0	0			16.9873	0	0
		6.2987	1	0.917431			2.177	1	1.07527
		9.0654	2	1.83486			3.7172	2	13.9785
		10.8921	3	2.75229			3.2989	3	15.0538
		5.5587	4	1.83486			8.4856	4	9.67742
		6.3161	5	4.58716			5.6089	5	8.60215
		6.8333	6	7.33945			8.5087	6	7.52688
		7.5927	7	1.83486			10.5591	7	5.37634
		16.4829	8	3.66972			8.1738	8	5.37634
		16.2349	9	8.25688			2.8103	9	6.45161
		10.8377	10	4.58716			4.1069	10	10.7527
		11.7101	11	2.75229			4.3434	11	2.15054
		12.5783	12	8.25688			9.043	12	5.37634
		11.8691	13	3.66972			2.5515	13	2.15054
		6.2876	14	1.83486			6.0894	14	1.07527
		9.2921	15	3.66972			9.3509	15	2.15054
		1.6631	16	7.33945			10.3687	16	0
		6.2002	17	1.83486			9.121	17	2.15054
		6.2148	18	4.58716			11.5847	18	1.07527
		13.1329	19	1.83486			11.5819	19	0
		18.4731	20	2.75229			2.2588	20	0
		8.0504	21	7.33945			9.2427	21	0
		9.1694	22	2.75229			10.2418	22	0
		12.2829	23	0.917431			2.4026	23	0
		8.7361	24	4.58716			4.4175	24	0
		15.7336	25	0.917431			3.0492	25	0
		10.3102	26	1.83486			2.4314	26	0
		15.6224	27	0.917431			2.3637	27	0
		5.234	28	2.75229			2.6144	28	0
		5.6702	29	0.917431			3.4089	29	0
		10.6719	30	0.917431			4.3854	30	0
		13.2569	31	0			4.2704	31	0
		15.5866	32	0			6.4987	32	0
		14.9572	33	0			8.2137	33	0
		9.322	34	0			3.5023	34	0
		14.2138	35	0			9.3997	35	0
		9.8996					17.9131
		5.7091					16.9243
		8.2188					2.8755
		8.7434					2.7094
		8.6403					3.1411
		16.3282					5.9871
		5.3649					6.0873
		8.4328					2.6006
		11.8524					15.0202
		4.5403					2.917
		2.6655					5.9945
		3.8229					4.5496
		5.3247					4.9325
		13.9453					6.9176
		10.0702					8.3676
		11.9382					10.2846
		20.1262					4.9282
		12.0347					6.6634
		9.08					4.4275
		10.3851					6.9481
		25.1393					9.9017
		11.6023					10.2369
		0.9826					10.5798
		4.6667					1.7736
		3.3168					3.0979
		3.4617					1.7724
		15.9761					2.2315
		15.1655					6.9079
		18.4321					5.4827
		20.8897					2.0667
		21.0439					3.1411
		20.91					10.0356
		23.8694					9.5027
		22.4859					10.0356
		30.0431					9.524
		2.0056					13.3574
		21.2362					14.8876
		24.2329					2.2391
		25.9728					1.8696
		21.4					1.9749
		23.1851					5.1981
		23.6514					5.0641
		20.9771					4.8232
		19.9227					11.7602
		19.0827					1.1039
		16.7961					6.174
		26.6912					13.5877
		27.7382					11.7403
		12.0095					3.4416
		20.3251					4.9598
		21.7004					8.1363
		20.6312					4.1746
		16.3765					1.8741
		21.2401					12.0389
		9.7017					12.9599
		11.5508					9.6124
		18.5937					7.325
		22.4609
		26.0173
		28.3034
		28.8464
		28.0689
		14.7408
		8.6724
		17.3153
		18.0493
		24.0316
		23.9669
		6.8604
		18.2859
		13.2724
		15.1315
		18.0193
