# Supplementary material for: Concerted action of kinesins KIF5B and KIF13B promotes efficient secretory vesicle transport to microtubule plus ends
Source: eLife. 2020 Nov 11;9:e61302. doi: 10.7554/eLife.61302 (PMC7710357; doi:10.7554/eLife.61302)
Supplement: Figure 7—source data 1. [file elife-61302-fig7-data1.xlsx]

## Sheet: Figure 7C
Figure 7C
(Number of vesicles /mm2/50 s)
		Control	MAP7-KO	MAP7-KO + MAP7D1/3-KD
		10.0942	16.3312	5.6721
		54.8173	12.0527	4.4181
		19.8096	16.4717	3.4494
		30.2636	18.3181	8.1282
		73.9213	27.3253	3.0298
		32.8944	27.1336	7.479
		36.486	27.5309	9.8015
		25.0246	23.6347	15.0353
		39.546	18.7952	9.8846
		36.5854	25.83	19.8396
		34.0577	52.2103	30.9819
		27.922	43.5868	9.0642
		20.9735	35.0394	39.626
		21.2614	23.0167	28.9956
		62.4723	9.0229	3.9556
		29.921	22.0605	18.2034
		38.055	27.4709	30.2507
		16.2053	40.7497	10.7673
		49.2767	41.5452	18.1843
		29.7765	25.0402	47.629

## Sheet: Figure 7D
Figure 7D
		Control					MAP7-KO					MAP7-KO + MAP7D1/3-KD
			Histogram					Histogram					Histogram
		Speed (µm/s)	Bin center	%			Speed (µm/s)	Bin center	%			Speed (µm/s)	Bin center	%
		1.232	0.05	0			1.118	0.05	0			2.573	0.05	0
		1.465	0.15	0			0.721	0.15	0			0.851	0.15	0
		1.514	0.25	0			1.098	0.25	0			1.156	0.25	0
		1.323	0.35	0			1.184	0.35	0			1.698	0.35	0
		1.363	0.45	0.1389			1.776	0.45	0.1233			2.047	0.45	0.0845
		0.885	0.55	0.4962			1.159	0.55	0.5424			1.132	0.55	0.2536
		0.884	0.65	1.9055			0.949	0.65	1.6519			0.909	0.65	1.3102
		1.31	0.75	2.8781			0.773	0.75	2.8107			2.12	0.75	3.2967
		0.867	0.85	5.5776			1.253	0.85	4.7337			2.415	0.85	4.0997
		1.182	0.95	7.8206			1.045	0.95	7.5197			1.922	0.95	4.4801
		1.403	1.05	10.9369			1.106	1.05	9.5414			0.847	1.05	7.3542
		1.838	1.15	12.5844			1.11	1.15	11.5385			1.027	1.15	9.2561
		1.237	1.25	14.4899			0.981	1.25	12.426			1.516	1.25	11.5385
		0.917	1.35	12.2271			0.846	1.35	11.6864			1.072	1.35	10.2705
		1.288	1.45	8.555			0.973	1.45	9.8373			1.195	1.45	8.918
		1.408	1.55	6.2922			1.357	1.55	6.8787			1.904	1.55	7.8191
		1.619	1.65	3.9103			1.188	1.65	5.3748			1.766	1.65	5.9594
		2.056	1.75	2.6399			1.303	1.75	3.5996			1.177	1.75	4.7337
		2.416	1.85	1.9651			1.085	1.85	2.9093			1.56	1.85	3.6771
		1.119	1.95	1.449			1.201	1.95	1.6272			1.378	1.95	3.0854
		1.292	2.05	1.3696			1.224	2.05	1.4053			1.56	2.05	2.1978
		1.865	2.15	0.8337			1.147	2.15	1.1834			2.947	2.15	1.9865
		1.057	2.25	0.6153			1.002	2.25	0.9862			1.174	2.25	1.2257
		1.091	2.35	0.5955			1.162	2.35	0.6903			0.68	2.35	1.268
		1.777	2.45	0.4764			0.557	2.45	0.6657			2.973	2.45	1.0989
		2.108	2.55	0.3374			1.111	2.55	0.5671			2.014	2.55	1.3948
		2.474	2.65	0.3573			0.8	2.65	0.3452			1.626	2.65	0.3804
		2.002	2.75	0.3573			1.212	2.75	0.1726			2.314	2.75	0.8876
		1.207	2.85	0.2183			1.026	2.85	0.2712			2.189	2.85	0.4649
		1.164	2.95	0.1786			0.859	2.95	0.1726			1.505	2.95	0.5495
		0.919	3.05	0.1588			0.818	3.05	0.1233			1.565	3.05	0.6762
		1.678	3.15	0.1191			0.724	3.15	0.0986			0.578	3.15	0.3804
		0.928	3.25	0.0794			2.257	3.25	0.0493			1.198	3.25	0.2113
		1.171	3.35	0.0992			0.839	3.35	0.074			1.365	3.35	0.2536
		1.076	3.45	0.0397			0.888	3.45	0.074			2.165	3.45	0.1691
		1.339	3.55	0.0794			0.962	3.55	0.074			1.501	3.55	0.0845
		1.286	3.65	0.0397			1.108	3.65	0.0247			2.188	3.65	0.1691
		1.482	3.75	0.0595			2.623	3.75	0.074			1.427	3.75	0.0845
		1.055	3.85	0			0.983	3.85	0			1.298	3.85	0.0423
		1.373	3.95	0.0397			1.14	3.95	0.0247			1.094	3.95	0.0845
		1.466	4.05	0.0198			1.142	4.05	0			0.727	4.05	0.0423
		1.304	4.15	0			0.816	4.15	0.074			1.743	4.15	0.0423
		1.323	4.25	0			1.274	4.25	0.0247			1.521	4.25	0.0845
		1.315	4.35	0.0198			1.196	4.35	0			1.089	4.35	0
		1.061	4.45	0			1.139	4.45	0			1.557	4.45	0
		1.515	4.55	0.0198			1.734	4.55	0			2.089	4.55	0
		1.208	4.65	0			1.055	4.65	0			1.62	4.65	0.0423
		3.145	4.75	0			1.533	4.75	0			1.227	4.75	0
		1.234	4.85	0			2.251	4.85	0			2.663	4.85	0.0423
		1.184	4.95	0.0198			1.054	4.95	0			2.268	4.95	0
		1.456	5.05	0			0.832	5.05	0			2.22	5.05	0
		1.096	5.15	0			0.85	5.15	0			2.325	5.15	0
		1.069	5.25	0			1.482	5.25	0.0247			1.503	5.25	0
		1.579	5.35	0			0.775	5.35	0			1.044	5.35	0
		1.564	5.45	0			1.461	5.45	0			1.567	5.45	0
		1.096	5.55	0			1.534	5.55	0			1.6	5.55	0
		1.772	5.65	0			0.983	5.65	0			1.552	5.65	0
		1.208	5.75	0			0.569	5.75	0			1.047	5.75	0
		1.31	5.85	0			1.099	5.85	0			0.851	5.85	0
		1.291	5.95	0			1.101	5.95	0			1.438	5.95	0
		1.835	6.05	0			1.493	6.05	0			1.377	6.05	0
		1.375	6.15	0			1.398	6.15	0			0.649	6.15	0
		1.075	6.25	0			1.089	6.25	0			1.706	6.25	0
		0.635	6.35	0			1.53	6.35	0			1.019	6.35	0
		1.484	6.45	0			1.054	6.45	0			1.144	6.45	0
		0.81	6.55	0			1.159	6.55	0			3.1	6.55	0
		1.446	6.65	0			0.743	6.65	0			0.822	6.65	0
		1.195	6.75	0			0.941	6.75	0			1.376	6.75	0
		1.014	6.85	0			1.1	6.85	0			1.318	6.85	0
		1.232	6.95	0			1.084	6.95	0			1.554	6.95	0
		1.318	7.05	0			1.193	7.05	0			1.778	7.05	0
		1.277	7.15	0			1.052	7.15	0			1.357	7.15	0
		1.983	7.25	0			0.861	7.25	0			1.29	7.25	0
		1.247	7.35	0			0.998	7.35	0			1.383	7.35	0
		1.777	7.45	0			0.836	7.45	0			1.505	7.45	0
		1.123	7.55	0			1.463	7.55	0			1.906	7.55	0
		1.173	7.65	0			1.608	7.65	0			1.166	7.65	0
		1.116	7.75	0			1.099	7.75	0			0.707	7.75	0
		1.253	7.85	0			1.101	7.85	0			0.929	7.85	0
		1.594	7.95	0			1.067	7.95	0			1.048	7.95	0
		1.132	8.05	0			1.511	8.05	0			1.234	8.05	0
		1.014	8.15	0			0.973	8.15	0			1.08	8.15	0
		1.095	8.25	0			1.174	8.25	0			1.104	8.25	0
		1.328	8.35	0			0.826	8.35	0			1.72	8.35	0
		0.882	8.45	0			1.206	8.45	0			1.516	8.45	0
		1.123	8.55	0			1.292	8.55	0			1.833	8.55	0
		1.265	8.65	0			1.101	8.65	0			1.53	8.65	0
		1.049	8.75	0			1.205	8.75	0			1.89	8.75	0
		1.528	8.85	0			1.152	8.85	0			1.598	8.85	0
		1.53	8.95	0			1.231	8.95	0			1.484	8.95	0
		1.945	9.05	0			0.892	9.05	0			1.957	9.05	0
		1.028	9.15	0			1.407	9.15	0			1.52	9.15	0
		1.216	9.25	0			1.889	9.25	0			1.122	9.25	0
		1.06	9.35	0			1.177	9.35	0			0.686	9.35	0
		1.393	9.45	0			1.309	9.45	0			1.22	9.45	0
		1.255	9.55	0			0.823	9.55	0			1.072	9.55	0
		0.99	9.65	0			0.963	9.65	0			1.382	9.65	0
		1.327	9.75	0			0.889	9.75	0			1.649	9.75	0
		1.02	9.85	0			0.797	9.85	0			0.756	9.85	0
		1.613	9.95	0			1.361	9.95	0			1.682	9.95	0
		3.792					1.152					1.823
		1.078					1.319					1.538
		1.189					0.756					1.565
		1.086					1.668					1.901
		1.094					1.744					1.666
		1.211					1.421					2.108
		1.21					1.483					1.291
		1.166					1.911					1.08
		1.405					0.65					2.229
		1.197					1.212					0.974
		2.372					1.229					1.28
		1.21					1.918					2.122
		1.588					1.222					2.348
		1.341					0.781					2.324
		1.266					1.803					2.164
		1.511					0.962					1.611
		1.312					0.859					1.803
		1.225					1.983					2.948
		2.185					1.282					1.445
		1.946					0.978					1.37
		1.376					1.192					1.048
		1.347					2.118					0.784
		1.975					1.528					1.739
		0.991					1.381					1.454
		1.129					2.161					1.853
		1.774					0.942					1.233
		1.229					0.697					1.093
		0.81					1.534					1.086
		1.01					1.663					1.466
		1.113					1.218					1.254
		1.958					0.84					1.579
		1.121					1.151					1.446
		2.184					1.18					1.275
		1.214					1.006					1.517
		1.537					1.221					1.442
		1.551					1.269					1.035
		1.277					1.495					1.094
		1.338					1.154					1.451
		0.923					1.803					1.102
		1.212					1.143					2.199
		0.713					1.405					1.753
		0.974					1.356					1.506
		1.29					1.159					1.356
		1.298					1.226					1.394
		1.259					1.108					2.511
		0.945					1.348					2.157
		1.394					1.017					1.935
		1.349					1.273					1.729
		1.302					1.458					1.169
		1.05					1.022					3.508
		1.296					1.025					1.456
		1.243					1.004					1.24
		0.521					1.054					0.948
		1.284					1.279					1.233
		1.377					1.331					1.014
		1.219					1.563					1.537
		1.051					0.912					1.078
		1.105					1.866					1.191
		0.92					1.51					1.046
		1.281					1.471					0.919
		1.458					1.219					1.629
		1.764					1.079					1.196
		1.418					1.026					1.274
		1.323					0.855					1.958
		0.61					1.938					2.41
		1.147					1.116					1.239
		1.396					1.686					1.648
		1.783					1.044					1.138
		0.993					0.942					1.29
		1.781					1.112					1.901
		1.097					1.634					1.15
		0.835					0.864					1.123
		1.265					2.57					0.87
		1.383					1.44					0.908
		1.356					1.134					2.213
		1.427					1.437					1.124
		1.333					1.78					2.508
		3.566					2.261					1.413
		1.1					1.781					1.434
		1.345					1.236					1.393
		1.482					1.708					1.4
		0.897					2.019					1.213
		1.367					1.342					1.267
		1.585					0.932					1.344
		1.222					1.166					1.731
		1.033					0.958					1.744
		1.265					1.233					1.339
		0.966					1.678					0.689
		1.386					1.87					0.898
		1.043					0.596					1.135
		3.033					1.096					1.57
		1.328					1.32					1.39
		0.867					2.612					3.22
		1.398					1.102					2.348
		2.148					0.842					1.969
		1.299					2.311					1.121
		1.191					0.911					1.198
		1.251					1.181					1.499
		1.262					1.23					0.891
		1.827					0.963					0.873
		1.242					1.006					3.151
		1.3					1.025					1.229
		1.483					1.09					1.602
		1.743					1.092					1.071
		1.462					1.193					1.532
		1.12					1.277					1.765
		1.168					2.575					1.879
		1.24					1.128					1.247
		1.145					0.985					1.545
		1.178					1.363					1.052
		1.45					1.281					1.892
		1.178					2.446					2.199
		1.692					1.093					0.83
		1.61					1.863					2.778
		1.524					0.884					2.884
		1.515					0.815					1.552
		1.395					1.188					1.24
		2.008					0.97					1.012
		1.104					0.889					0.68
		2.019					1.18					1.478
		1.5					0.8					1.993
		1.226					1.672					1.688
		1.046					0.752					1.605
		1.082					0.736					1.023
		1.711					1.628					1.45
		2.068					0.919					1.069
		1.102					0.707					1.268
		1.232					3.159					1.483
		0.788					1.221					1.848
		0.796					0.581					1.606
		1.239					1.115					1.499
		1.356					1.369					1.484
		1.241					1.427					1.807
		1.853					1.1					1.33
		0.838					0.907					0.761
		1.673					1.401					1.255
		1.423					1.009					1.628
		1.43					1.264					0.98
		1.723					0.88					1.988
		1.212					1.565					1.073
		1.256					0.945					1.693
		1.383					1.273					1.523
		0.866					1.621					0.761
		1.006					1.709					1.57
		1.481					1.18					1.388
		1.19					1.264					3.018
		0.976					0.981					2.152
		1.382					1.709					1.276
		1.609					1.021					1.661
		1.121					1.468					1.476
		1.43					1.517					2.039
		1.586					1.455					1.162
		0.842					1.331					1.224
		1.232					1.112					2.331
		1.325					1.342					1.791
		1.492					1.887					1.355
		1.327					1.835					1.161
		1.447					1.266					1.251
		1.547					0.873					1.023
		0.968					0.857					0.786
		1.059					2.083					1.012
		1.098					1.146					1.601
		1.06					1.31					1.18
		0.64					1.043					1.759
		1.47					1.148					0.863
		1.267					3.015					2.479
		1.182					1.504					1.257
		1.114					1.24					0.848
		1.235					1.806					0.961
		1.152					1.371					1.338
		2.212					1.305					1.079
		1.857					1.48					1.211
		1.475					1.211					1.283
		1.266					1.324					1.376
		1.101					1.041					1.211
		1.305					1.122					1.506
		1.315					1.717					0.812
		1.595					1.186					1.164
		0.921					1.183					2.143
		1.356					0.986					1.052
		1.524					1.591					1.14
		1.21					1.104					1.202
		1.192					2.551					1.367
		1.695					0.939					1.693
		1.41					2.086					1.569
		1.464					1.513					2.105
		1.793					0.91					1.784
		1.185					1.25					1.206
		1.808					1.871					1.698
		2.034					1.321					2.097
		1.193					1.019					1.008
		1.298					1.172					1.905
		1.162					1.23					2.527
		0.969					1.529					0.605
		1.529					1.371					1.566
		0.82					1.308					1.758
		0.823					1.907					1.685
		1.632					1.302					1.8
		0.74					0.958					1.314
		1.21					1.174					1.654
		0.86					1.233					0.79
		1.238					1.111					2.233
		1.139					1.349					1.642
		1.9					1.144					1.634
		1.475					0.797					1.881
		1.265					1.36					1.706
		1.024					1.317					0.814
		1.349					2.275					3.184
		1.104					1.553					1.136
		1.214					2.22					1.143
		1.734					2.35					0.872
		1.557					0.989					0.729
		1.133					1.442					0.652
		1.119					1.712					1.164
		1.879					2.088					1.717
		0.84					1.177					1.829
		2.061					0.694					1.162
		1.05					1.151					2.023
		1.048					0.795					1.651
		1.134					1.035					1.719
		1.54					0.981					1.743
		2.318					1.549					1.339
		1.519					0.84					1.355
		1.046					0.933					1.979
		1.401					1.275					1.621
		0.855					1.725					1.3
		1.692					2.42					0.904
		1.366					1.57					2.888
		1.529					0.811					2.074
		1.637					1.435					1.443
		1.55					1.63					1.342
		1.806					1.403					1.461
		1.647					1.691					1.083
		1.573					1.155					2.02
		1.198					1.137					2.322
		1.195					1.494					1.084
		0.698					1.942					1.194
		1.356					1.329					2.06
		0.753					0.671					2.621
		0.835					1.385					1.325
		2.673					1.169					2.29
		1.547					1.349					1.206
		1.568					1.211					1.933
		1.086					1.755					1.04
		1.465					1.331					2.539
		1.287					1.143					1.709
		1.5					1.036					1.33
		3.086					1.182					1.095
		1.173					0.697					1.125
		2.225					1.337					1.631
		1.557					1.451					0.74
		0.786					1.28					1.848
		1.511					1.291					0.863
		0.964					1.344					2.785
		1.516					1.284					2.342
		0.983					1.883					1.41
		0.983					1.162					1.333
		1.109					1.434					1.766
		0.865					1.447					1.275
		1.76					1.25					1.038
		1.558					1.927					0.784
		0.581					1.904					1.358
		1.561					1.119					2.536
		1.324					1.129					0.997
		0.845					1.193					1.202
		1.14					0.776					1.202
		1.228					0.813					0.814
		1.238					1.493					1.383
		0.922					1.052					1.288
		1.436					1.018					1.589
		1.21					1.098					1.33
		2.015					1.012					1.215
		2.735					1.601					1.239
		0.57					1.076					1.07
		1.205					1.269					1.418
		1.228					1.132					0.766
		1.165					1.154					1.342
		1.329					1.622					1.436
		1.103					1.52					1.999
		0.93					1.638					1.441
		1.144					2.034					1.364
		1.244					1.168					3.24
		1.007					1.107					2.201
		1.023					2.41					1.43
		1.655					1.02					1.098
		1.768					2.332					1.143
		1.39					1.158					1.914
		1.191					0.704					1.173
		1.018					0.914					2.241
		1.152					2.113					1.366
		1.254					1.153					2.566
		1.38					0.741					1.608
		1.029					1.287					2.578
		0.929					0.8					2.963
		1.404					1.089					1.52
		2.514					1.732					1.054
		1.739					1.579					2.026
		1.465					1.973					1.494
		0.86					1.376					2.577
		1.18					1.449					1.605
		1.365					1.085					0.921
		1.516					1.058					1.174
		2.236					1.37					1.791
		0.848					1.264					2.176
		0.912					1.423					2.766
		1.922					1.404					1.792
		1.237					1.273					0.964
		0.896					1.179					0.986
		1.563					1.255					2.482
		1.312					0.77					1.502
		1.867					1.03					1.354
		0.606					2.521					1.795
		0.758					1.397					1.785
		1.253					1.146					1.273
		0.676					1.561					1.468
		1.214					1.293					1.766
		1.198					1.109					1.472
		1.604					1.716					1.389
		1.703					1.397					2.495
		0.748					1.062					2.229
		1.233					1.564					1.462
		1.622					0.921					2.099
		1.359					3.603					1.308
		0.837					0.981					1.415
		0.867					0.952					2.271
		1.341					1.083					1.605
		1.119					0.869					1.51
		0.666					1.466					1.393
		0.959					1.48					1.328
		1.414					1.317					1.895
		1.078					1.487					1.294
		0.985					1.186					1.844
		1.071					1.512					1.537
		1.369					1.548					1.192
		1.254					1.27					1.885
		1.291					1.174					2.642
		1.772					1.68					1.379
		0.908					1.691					1.177
		1.03					1.491					1.543
		1.434					1.272					0.83
		1.028					1.227					1.504
		1.677					1.43					1.226
		1.368					2.3					1.214
		1.121					1.142					1.578
		1.403					1.402					1.579
		1.361					1.317					1.46
		1.364					0.757					3.036
		1.647					0.921					1.331
		2.029					1.002					1.05
		1.063					1.215					2.018
		1.514					1.47					1.587
		1.403					0.754					2.156
		0.841					1.015					3.857
		1.186					1.122					1.215
		2.043					1.508					1.204
		1.362					1.156					0.874
		1.052					1.451					1.335
		1.174					0.771					0.71
		0.973					1.54					3.472
		1.308					1.611					2.855
		1.586					1.293					1.103
		1.116					1.591					1.491
		1.032					1.325					1.168
		1.347					1.347					1.889
		0.745					1.442					1.347
		1.062					1.829					1.367
		1.311					1.67					1.748
		1.564					2.264					1.367
		1.188					1.214					1.086
		1.572					1.376					1.268
		1.283					1.041					1.003
		1.241					0.838					0.588
		1.184					1.326					1.338
		1.1					1.844					1.201
		1.529					1.363					1.512
		1.157					3.716					1.363
		1.826					0.915					1.421
		1.035					1.22					1.111
		1.002					0.964					1.868
		0.808					1.319					1.996
		2.519					1.013					2.573
		1.207					1.175					1.295
		1.138					1.027					1.258
		1.247					0.986					1.727
		0.839					1.645					1.591
		1.243					1.092					1.223
		0.918					1.386					1.412
		2.115					1.316					1.177
		0.612					1.736					1.038
		1.145					0.708					1.337
		0.847					1.2					1.476
		0.546					1.448					1.046
		2.06					1.047					2.214
		1.064					1.01					1.05
		1.384					1.058					1.465
		0.944					1.328					1.105
		0.818					1.16					0.812
		1.215					1.651					1.076
		2.049					0.778					1.486
		0.961					1.285					1.865
		1.459					1.505					1.464
		1.137					1.376					0.91
		1.041					1.206					1.072
		1.06					1.286					1.429
		1.213					1.236					0.649
		1.212					1.255					1.165
		1.055					1.411					2.27
		0.581					1.615					1.687
		1.107					1.017					1.546
		1.152					0.885					3.651
		1.364					0.886					1.126
		0.888					1.94					1.963
		1.155					1.148					0.907
		0.718					1.141					1.711
		0.993					1.429					3.001
		2.291					2.345					1.287
		1.063					0.967					1.405
		1.079					1.194					1.612
		1.22					0.955					1.018
		1.283					1.273					0.96
		1.358					1.488					0.767
		1.334					1.125					2.069
		1.236					1.585					1.151
		0.706					1.413					1.141
		1.376					1.212					0.809
		1.927					1.89					1.712
		1.123					2.254					0.963
		1.877					1.76					1.591
		1.14					1.485					1.976
		1.472					1.511					1.718
		1.012					2.038					1.664
		1.393					1.817					0.972
		1.237					1.616					1.792
		1.321					1.207					2.273
		1.052					1.032					1.447
		1.149					1.004					1.778
		1.211					1.271					2.234
		1.481					1.586					1.418
		1.229					1.299					0.847
		1.59					1.484					1.807
		0.853					1.062					1.709
		1.499					1.014					1.391
		0.74					1.171					0.694
		0.901					2.419					1.293
		1.151					1.346					1.071
		1.255					1.508					1.283
		1.903					0.85					1.369
		1.496					0.862					1.149
		0.771					1.312					2.363
		0.461					0.932					1.408
		0.882					1.096					1.467
		0.843					2.086					1.251
		0.942					1.16					1.519
		1.606					1.267					2.188
		1.597					0.85					1.112
		0.879					1.117					1.503
		1.05					1.179					1.266
		1.092					1.19					2.482
		0.889					1.541					1.339
		0.742					1.367					1.338
		0.688					1.815					1.585
		1.235					1.658					2.449
		1.077					1.011					1.283
		1.418					1.562					1.369
		1.127					1.37					2.268
		1.381					2.033					1.341
		1.314					1.342					1.42
		1.222					1.493					1.725
		1.547					0.903					0.822
		1.259					1.179					2.042
		0.909					1.495					1.846
		0.94					1.08					1.244
		2.523					2.23					1.482
		0.946					1.322					1.495
		1.136					1.188					1.77
		0.78					1.143					1.184
		1.017					0.784					1.053
		0.832					0.698					0.927
		1.281					1.806					1.274
		1.443					1.12					1.36
		1.147					1.456					1.446
		1.425					1.35					1.104
		1.016					0.968					1.682
		1.238					0.748					1.229
		0.703					1.091					1.149
		1.131					1.713					1.224
		0.635					1.179					2.008
		1.25					1.172					1.297
		0.892					0.865					0.903
		1.708					1.668					1.803
		1.339					1.025					0.763
		1.506					1.563					0.878
		1.598					1.164					1.211
		1.494					1.131					1.127
		1.455					1.536					1.222
		0.464					1.106					2.395
		1.484					1.584					1.319
		1.023					0.857					1.389
		2.778					1.264					1.046
		1.419					1.751					1.253
		1.387					1.219					1.26
		1.042					1.034					1.049
		1.911					1.138					2.781
		1.061					1.659					3.626
		0.962					1.191					0.714
		1.153					1.121					2.029
		0.883					1.527					1.657
		1.244					1.9					1.152
		1.585					1.258					0.906
		1.172					0.479					1.299
		1.137					1.277					1.095
		1.22					2.036					2.581
		0.977					1.131					1.256
		1.057					1.22					1.381
		1.371					1.264					1.461
		0.977					1.167					1.362
		0.775					1.326					1.147
		0.897					1.677					1.683
		1.053					1.327					3.277
		1.077					1.039					1.237
		1.527					1.313					1.404
		1.427					1.083					1.296
		1.262					1.339					1.766
		1.648					0.943					1.726
		1.681					0.755					0.859
		1.125					0.805					1.485
		1.232					1.507					1.839
		1.204					1.475					1.973
		1.456					0.924					1.072
		1.24					1.33					3.057
		2.013					1.795					1.879
		1.291					1.199					4.041
		1.338					1.727					1.367
		1.523					0.955					1.487
		1.467					1.058					2.316
		1.359					1.168					1.678
		2.514					1.594					1.943
		1.284					1.184					1.637
		1.385					1.353					1.756
		1.577					1.339					1.304
		0.732					1.079					1.406
		2.89					1.839					1.285
		0.963					1.704					1.437
		1.118					1.543					3.337
		1.265					0.987					1.615
		1.106					1.695					1.642
		1.511					1.105					0.834
		1.875					1.502					1.374
		1.061					1.383					1.447
		2.467					0.737					1.776
		2.435					0.953					1.299
		2.405					1.042					1.13
		1.242					1.392					1.42
		1.506					1.193					2.151
		1.192					1.056					0.944
		1.654					1.103					1.746
		1.599					2.185					2.144
		2.057					1.703					1.176
		1.89					1.461					1.282
		1.571					1.146					2.308
		1.082					0.889					1.641
		1.033					1.326					1.008
		1.167					1.841					1.86
		0.663					1.33					0.971
		1.148					1.584					1.344
		0.967					1.441					0.768
		1.505					1.04					1.42
		1.458					1.001					1.205
		1.427					0.89					1.183
		0.952					1.473					1.175
		1.182					1.712					1.482
		1.284					1.139					0.91
		1.129					0.96					1.383
		0.999					0.993					1.246
		1.92					1.418					1.667
		1.34					1.072					1.356
		2.712					0.928					2.931
		1.384					2.519					0.986
		1.169					1.55					2.31
		1.165					2.174					1.541
		1.661					1.95					1.331
		1.31					1.726					2.285
		1.33					2.077					1.146
		1.864					1.184					0.832
		1.123					1.333					1.223
		1.591					0.967					1.888
		1.598					0.885					1.079
		1.278					1.509					1.101
		1.558					1.055					1.453
		1.381					1.021					1.022
		0.916					1.118					1.431
		1.961					1.583					1.441
		2.043					1.48					1.16
		1.464					1.027					0.899
		1.484					1.493					2.574
		1.333					0.89					1.571
		1.172					0.884					1.437
		1.109					1.174					1.767
		1.024					1.618					0.96
		1.562					1.389					2.119
		1.546					2					1.977
		1.5					1.036					1.988
		0.813					1.409					2.012
		1.692					2.083					1.556
		1.722					1.612					0.845
		0.786					1.094					1.274
		1.355					0.724					1.236
		0.999					1.997					1.031
		1.242					2.503					1.44
		1.079					1.354					1.858
		0.704					1.61					1.125
		1.123					1.686					2.001
		0.891					2.075					0.716
		0.716					2.255					1.386
		1.257					1.458					1.256
		1.615					0.943					1.307
		1.186					1.535					1.96
		2.531					0.75					2.772
		0.986					0.868					0.721
		1.104					0.849					0.692
		1.131					1.287					1.338
		1.057					1.433					2.2
		1.771					1.604					1.36
		1.253					1.418					0.787
		0.935					1.232					1.395
		0.7					1.594					1.22
		1.054					1.505					1.539
		0.851					1.37					0.936
		1.174					1.573					1.299
		0.906					0.821					0.929
		1.632					0.722					1.373
		1.09					1.018					1.873
		1.841					0.486					1.641
		2.002					1.261					2.475
		1.261					1.205					1.265
		0.954					0.931					1.19
		1.334					1.301					1.228
		1.828					0.813					1.399
		1.404					1.042					0.989
		1.253					1.033					1.1
		1.173					1.115					1.57
		1.071					1.893					1.205
		1.077					1.628					1.698
		0.748					2.23					1.982
		0.824					1.4					1.096
		1.154					0.928					1.009
		1.478					1.603					2.159
		2.834					2.289					0.734
		1.854					1.436					1.287
		1.751					1.31					1.266
		1.123					1.047					1.064
		1.169					1.326					1.177
		1.5					1.612					1.044
		1.34					1.547					0.996
		0.981					1.206					1.145
		1.22					1.704					1.821
		1.385					1.801					1.523
		1.352					5.282					1.105
		2.731					3.141					1.402
		1.213					1.119					1.442
		0.943					0.605					1.275
		1.613					1.4					1.635
		0.866					1.831					1.171
		1.186					1.582					1.428
		2.117					1.88					1.155
		1.294					1.312					1.201
		1.645					1.195					0.883
		1.27					1.639					0.732
		0.973					0.976					1.373
		1.119					1.211					0.885
		0.842					0.931					0.703
		0.807					1.056					0.776
		1.275					1.074					1.183
		1.665					1.494					1.184
		1.386					1.174					1.656
		1.647					1.097					0.899
		1.418					1.533					1.552
		1.68					1.661					1.573
		1.728					1.121					1.343
		1.245					1.119					1.055
		2.05					1.213					0.868
		0.669					1.14					1.984
		0.859					0.906					1.35
		1.507					1.551					1.27
		1.346					0.59					1.103
		1.675					1.402					1.209
		1.943					1.655					0.983
		1.538					1.246					1.079
		1.895					1.379					0.782
		1.798					1.059					1.251
		1.379					1.052					1.237
		1.164					1.095					0.805
		1.285					0.585					2.598
		1.23					0.92					1.198
		1.376					1.74					0.952
		2.224					1.263					1.418
		0.994					1.312					0.697
		1.609					1.449					1.484
		2.996					1.466					1.28
		1.279					2.304					1.235
		1.677					2.221					0.772
		1.383					1.12					1.236
		2.268					1.421					1.159
		1.488					1.439					1.348
		1.113					1.332					1.318
		0.981					1.796					1.04
		1.867					1.123					1.676
		1.363					0.848					0.989
		0.987					1.035					1.059
		2.091					1.455					0.439
		1.134					1.352					1.433
		1.067					1.303					1.018
		1.324					1.321					0.604
		1.473					1.401					2.703
		1.319					1.187					1.55
		1.391					2.277					0.884
		0.944					1.029					1.097
		1.049					0.475					0.956
		1.069					1.22					1.199
		1.105					1.317					1.003
		0.945					1.39					1.321
		0.973					1.423					1.456
		1.367					0.983					1.056
		1.228					1.376					1.183
		0.852					1.32					2.375
		1.339					1.219					1.109
		1.629					1.424					1.454
		1.079					0.74					0.934
		1.078					1.089					1.315
		0.967					1.135					0.889
		1.826					1.112					1.297
		2.003					3.558					0.801
		1.532					1.465					1.436
		1.616					1.25					0.933
		1.442					0.65					0.78
		1.17					1.067					1.693
		1.182					1.432					0.875
		2.779					1.236					1.141
		0.687					2.147					1.348
		1.628					0.638					1.236
		1.087					1.702					0.782
		1.743					2.929					0.743
		1.163					1.326					0.83
		0.711					1.23					1.344
		1.09					1.31					1.022
		1.403					1.448					1.119
		1.422					1.873					1.224
		2.349					0.903					1.724
		1.233					0.979					2.718
		0.865					2.243					1.105
		0.628					0.76					1.299
		1.251					1.627					0.724
		0.924					1.362					0.821
		1.047					1.239					1.32
		0.984					1.42					1.158
		0.922					1.684					0.936
		1.077					1.697					1.47
		1.011					0.743					0.894
		1.253					0.995					1.166
		1.129					1.116					1.079
		0.685					1.259					0.796
		1.195					0.898					1.373
		1.209					1.261					1.063
		1.219					1.033					0.894
		1.004					1.002					1.759
		0.938					1.445					2.012
		1.018					1.013					0.716
		1.495					1.313					1.051
		1.188					0.678					0.867
		1.138					1.393					1.205
		0.865					1.506					1.2
		1.345					1.502					1.083
		1.49					1.322					1.168
		1.019					1.492					1.506
		1.146					2.592					1.075
		0.705					3.953					0.714
		1.284					1.562					1.26
		1.056					1.175					1.564
		1.531					1.641					1.478
		1.705					1.401					1.024
		1.228					1.886					1.2
		0.813					1.339					1.566
		0.785					1.514					1.067
		2.088					1.036					1.534
		1.15					1.022					1.719
		0.728					2.604					1.975
		1.196					1.34					1.148
		1.337					1.648					1.259
		1.426					1.167					1.276
		1.445					1.679					0.768
		0.924					1.485					1.013
		1.245					1.417					0.774
		1.264					1.21					0.912
		1.17					2.362					1.141
		1.375					1.858					1.794
		1.468					1.044					1.001
		0.903					1.814					1.322
		1.131					1.225					0.976
		1.543					1.739					1.925
		1.118					0.64					2.072
		1.18					1.38					1.866
		0.626					1.608					1.096
		1.361					0.939					1.249
		2.108					1.245					1.494
		1.49					1.043					1.173
		1.321					1.349					1.007
		1.291					1.492					1.566
		1.613					1.632					1.234
		1.213					1.027					0.763
		1.34					1.299					1.28
		1.08					1.444					0.906
		0.933					1.091					0.897
		1.302					0.709					0.883
		0.938					1.525					2.269
		0.832					1.468					1.185
		1.232					1.639					0.743
		1.037					1.638					0.804
		1.284					1.524					1.765
		1.673					1.096					1.029
		1.072					1.688					1.262
		0.85					1.402					2.845
		1.18					1.756					1.03
		1.323					0.945					1.526
		1.63					3.051					1.946
		2.213					1.098					1.813
		0.888					1.542					1.242
		1.003					2.051					1.247
		1.115					1.181					1.447
		1.347					1.711					0.875
		2.138					1.243					1.091
		1.638					2.023					1.527
		0.813					1.185					1.749
		1.874					1.43					1.072
		1.765					1.168					2.082
		1.607					1.36					2.541
		1.206					1.152					1.754
		1.536					1.381					1.069
		0.698					1.271					1.364
		1.521					1.363					1.491
		1.167					1.104					1.185
		1.26					1.384					0.984
		1.563					1.278					2.521
		1.488					1.587					1.477
		2.622					1.519					3.706
		1.618					1.482					1.107
		1.394					1.557					1.567
		0.999					1.254					0.884
		1.132					1.397					1.807
		1.412					1.31					1.428
		0.542					1.218					0.585
		1.326					1.463					1.098
		1.226					1.203					1.615
		1.354					1.241					1.787
		1.197					1.127					1.565
		1.445					1.175					1.059
		1.002					1.471					1.652
		0.862					1.36					1.72
		0.66					1.582					2.109
		0.795					1.434					1.624
		1.284					0.965					1.37
		0.987					0.976					1.6
		0.921					1.444					1.913
		0.861					1.478					1.339
		1.404					0.717					1.199
		1.19					0.735					1.333
		1.319					1.236					1.106
		0.958					1.081					1.203
		1.44					1.192					1.242
		0.868					0.957					1.523
		1.382					1.193					1.232
		1.141					2.361					1.244
		1.691					1.585					2.321
		1.372					1.361					1.424
		1.627					1.443					1.608
		1.117					1.397					1.063
		1.967					1.214					1.882
		1.066					0.905					1.32
		2.007					0.903					1.951
		1.26					0.983					2.995
		1.504					1.206					1.527
		0.965					1.097					0.858
		1.277					4.278					0.921
		1.234					0.904					0.995
		1.348					1.393					0.978
		1.121					1.566					1.349
		0.989					1.045					1.516
		1.328					0.945					1.765
		1.415					0.869					2.704
		1.293					0.891					1.254
		1.006					1.497					1.333
		0.946					0.941					1.711
		0.942					1.713					1.204
		1.127					1.115					1.175
		1.08					1.324					1.44
		1.334					2.388					1.36
		1.454					1.39					1.755
		0.836					1.6					1.339
		1.246					2.207					1.64
		1.451					1.216					2.732
		1.015					1.263					1.023
		1.293					1.712					1.314
		0.917					1.006					1.917
		0.719					1.174					1.558
		1.443					1.073					0.885
		0.92					0.995					3.761
		0.935					1.09					2.587
		0.696					1.265					2.158
		0.975					1.487					2.315
		1.584					1.881					1.468
		1.272					0.926					1.008
		1.157					1.148					1.253
		1.234					2.602					1.422
		1.992					1.545					3.072
		1.264					0.916					1.334
		1.403					0.7					1.437
		1.236					1.904					0.838
		1.047					1.71					0.763
		1.253					1.386					0.779
		1.153					2.027					1.607
		1.434					1.217					1.203
		1.224					1.236					1.496
		0.924					1.483					1.538
		1.566					1.498					1.307
		1.591					1.305					1.532
		1.608					1.252					1.908
		1.011					1.384					1.14
		1.48					1.581					1.07
		0.921					0.959					1.334
		1.098					1.406					0.79
		1.233					1.178					0.701
		1.375					1.358					1.193
		1.278					2.416					1.509
		2.13					1.111					2.286
		1.19					1.252					1.576
		2.061					1.858					1.349
		1.5					1.343					1.715
		1.301					1.496					1.338
		0.981					1.278					1.67
		1.072					1.394					1.286
		2.376					1.478					2.092
		0.925					1.915					1.889
		1.296					1.29					0.843
		1.265					0.98					1.524
		1.129					1.435					1.311
		1.424					1.339					0.876
		1.031					1.65					1.667
		1.069					1.618					1.884
		1.019					1.098					1.681
		1.102					1.105					1.48
		1.702					1.107					0.654
		1.391					1.345					0.792
		0.808					1.136					1.171
		1.57					1.242					1.168
		1.308					1.12					1.191
		0.704					1.265					1.213
		1.303					1.103					1.643
		1.122					1.25					0.963
		1.03					0.948					1.39
		1.072					1.6					1.193
		0.823					1.288					1.029
		1.313					1.049					0.915
		1.894					2.146					1.899
		1.07					0.834					3.099
		1.76					1.203					4.159
		0.92					1.494					1.731
		0.662					1.384					1.296
		1.343					1.147					1.98
		1.477					1.251					1.396
		1.198					1.215					1.467
		1.411					1.195					1.827
		1.039					1.248					1.563
		1.088					1.072					1.607
		0.665					1.193					0.864
		1.353					0.91					0.866
		1.315					1.336					1.103
		1.389					1.361					1.685
		0.919					0.855					1.758
		2.02					0.891					1.181
		1.583					1.721					1.41
		1.7					0.972					0.882
		0.855					1.086					1.259
		1.314					0.723					2.387
		1.286					1.242					2.671
		0.914					1.308					1.919
		0.984					1.358					1.561
		0.918					1.426					1.151
		0.875					2.873					0.913
		0.684					1.358					1.389
		1.399					1.422					0.905
		1.134					1.1					1.608
		0.815					1.001					1.17
		1.258					0.568					1.062
		1.625					1.125					1.248
		0.934					1.566					1.185
		0.92					1.39					3.174
		1.131					0.887					1.947
		1.085					0.752					1.447
		1.218					1.275					1.369
		0.993					1.029					1.246
		0.891					1.203					0.933
		1.044					1.015					1.679
		1.051					1.173					2.593
		1.448					2.041					1.252
		1.234					1.461					0.804
		0.963					2.075					1.441
		1.108					1.233					1.91
		1.844					1.652					1.91
		0.909					1.431					1.358
		0.897					1.202					1.556
		0.826					1.531					0.783
		1.931					2.03					3.372
		1.202					1.175					1.849
		0.964					1.136					1.768
		1.318					1.302					1.175
		0.689					1.635					1.172
		0.95					1.395					1.474
		1.097					1.389					1.205
		1.135					1.353					1.448
		1.286					1.022					1.119
		1.524					0.823					0.917
		0.676					1.188					1.105
		0.799					0.583					1.776
		0.993					0.956					1.815
		0.954					0.919					1.09
		1.223					0.938					1.017
		0.93					1.001					1.396
		0.948					1.101					2.981
		1.275					1.975					1.605
		1.529					1.604					1.901
		1.232					1.247					1.188
		2.359					1.134					1.228
		1.383					0.811					0.729
		1.287					1.111					1.166
		1.656					1.384					1.263
		0.943					1.525					1.051
		1.486					1.057					1.364
		1.535					1.082					1.104
		0.9					1.119					1.049
		0.804					1.809					1.207
		1.112					0.992					1.189
		1.324					2.204					1.205
		1.41					1.6					1.115
		1.935					1.411					1.868
		1.308					2.109					2.326
		0.833					1.026					2.782
		0.902					0.909					1.335
		1.282					2.146					1.068
		1.245					1.364					2.547
		1.443					0.94					1.11
		1.727					1.816					2.539
		1.484					1.065					1.318
		1.484					0.923					1.383
		1.033					1.35					1.251
		1.083					0.755					1.169
		1.438					1.091					1.004
		0.98					1.796					2.709
		1.022					1.212					1.29
		1.347					1.205					1.371
		0.963					1.084					0.746
		1.192					1.182					0.877
		1.584					1.399					0.739
		1.143					1.811					0.892
		1.251					1.122					2.021
		1.573					1.846					1.311
		1.44					1.292					1.046
		1.145					1.651					2.425
		2.057					1.445					1.338
		1.879					2.254					2.96
		1.063					1.103					1.508
		0.969					2.081					3.44
		1.037					1.655					3.046
		1.803					1.23					1.296
		0.773					1.323					1.012
		2.552					1.494					1.376
		1.007					1.072					1.345
		0.825					0.803					1.177
		1.348					1.174					1.582
		1.305					1.016					1.866
		1.315					0.749					3.939
		1.102					1.32					1.038
		1.65					0.976					1.137
		1.255					1.169					0.751
		1.119					1.444					1.052
		1.213					1.779					1.316
		1.143					2.843					1.275
		1.178					1.108					1.7
		0.879					1.463					3.555
		0.847					1.311					1.82
		1.484					1.164					1.007
		1.338					0.894					1.49
		0.97					0.665					1.402
		1.226					1.29					1.644
		1.25					3.319					2.468
		1.389					1.41					3.334
		1.503					2.065					1.616
		0.896					1.363					1.25
		1.07					1.215					1.718
		1.265					1.183					1.481
		1.112					1.308					1.345
		1.355					1.272					1.643
		1.219					1.741					1.627
		1.209					1.581					1.027
		1.294					1.832					1.51
		1.009					0.983					3.107
		1.511					0.689					1.045
		1.149					1.382					1.285
		0.96					1.415					1.374
		0.993					1.526					1.559
		1.217					1.082					2.57
		0.598					1.378					1.311
		1.012					1.052					2.796
		1.191					0.87					1.433
		0.929					1.451					0.9
		1.176					1.808					1.313
		1.414					1.107					1.456
		1.093					1.54					2.627
		1.092					1.044					1.523
		1.143					1.153					2.091
		1.514					0.848					1.588
		0.932					1.164					1.129
		1.262					1.099					1.288
		1.357					1.001					1.261
		1.272					2.022					1.242
		1.512					1.294					1.398
		0.934					1.036					1.208
		1.212					1.787					2.107
		1.167					0.88					2.713
		0.974					0.938					3.198
		1.2					1.495					1.394
		1.208					1.032					1.053
		0.645					1.196					2.069
		1.19					1.834					1.064
		0.962					1.066					1.26
		1.134					1.109					1.254
		0.801					1.203					1.201
		1.294					1.77					2.351
		1.491					1.214					2.557
		1.366					0.984					1.101
		1.05					1.662					1.254
		0.571					0.996					1.437
		1.206					0.935					1.532
		1.146					1.326					0.953
		1.042					1.012					2.082
		1.826					1.104					1.604
		1.58					0.843					1.423
		1.261					1.448					1.004
		1.344					1.415					1.213
		1.177					1.352					1.76
		2.743					1.444					0.957
		1.368					1.286					3.017
		0.785					1.242					1.076
		1.36					1.286					1.134
		1.532					1.176					2.641
		1.054					1.286					2.845
		1.209					0.855					2.008
		2.733					1.167					0.813
		0.781					0.947					0.727
		0.656					1.287					3.983
		1.415					1.236					2.598
		1.189					1.129					2.406
		1.282					1.294					1.261
		0.758					1.645					4.258
		0.858					0.835					4.224
		1.239					1.599					1.611
		1.336					1.127					1.447
		1.133					1.093					2.748
		0.94					1.301					1.603
		0.734					1.255					1.425
		1.105					0.76					2.567
		1.221					1.287					1.572
		1.015					0.956					0.838
		1.684					1.653					0.994
		1.191					1.179					1.482
		1.536					0.692					1.328
		0.834					1.049					1.231
		0.894					1.006					1.69
		0.891					1.867					0.918
		1.02					1.382					1.49
		1.061					0.762					0.686
		1.548					1.903					1.395
		1.228					1.257					1.039
		1.649					2.463					2.013
		1.062					1.442					1.319
		1.186					1.654					1.546
		1.051					1.275					1.342
		1.071					1.129					1.019
		1.206					1.095					1.649
		1.452					1.156					0.661
		1.378					1.265					1.589
		1.364					1.445					2.161
		1.69					1.337					1.591
		1.167					1.148					1.416
		1.038					1.735					0.747
		1.204					1.295					1.63
		1.146					1.162					1.545
		1.347					1.083					2.344
		1.401					1.509					1.232
		1.177					0.979					1.091
		1.049					1.43					1.423
		1.221					0.983					1.126
		2.653					0.822					1.339
		0.902					1.546					2.51
		1.03					1.578					1.202
		0.557					1.198					1.097
		3.161					1.254					1.955
		1.254					1.263					1.244
		2.535					1.15					1.348
		2.015					1.929					1.119
		0.821					1.195					2.191
		1.086					0.577					1.307
		2.007					1.275					1.174
		1.285					1.615					1.061
		1.84					1.247					1.048
		1.21					1.244					1.848
		0.952					1.361					0.89
		0.923					0.95					1.245
		1.447					0.596					1.852
		1.484					0.82					2.134
		1.333					1.735					0.89
		0.963					2.205					1.437
		1.266					1.218					2.448
		1.29					1.436					1.009
		2.161					1.258					1.035
		1.333					0.967					2.201
		1.076					1.588					1.272
		0.937					1.279					1.262
		2.183					1.16					1.645
		0.792					0.933					0.945
		1.249					1.335					2.303
		0.944					1.38					1.296
		0.73					0.994					1.41
		1.1					1.011					1.443
		1.215					1.519					1.141
		0.993					1.728					0.681
		1.183					0.755					1.655
		1.228					1.312					0.806
		1.181					0.765					0.776
		0.854					1.537					1.991
		2.069					0.776					0.769
		1.127					1.648					3.107
		0.899					1.64					1.547
		1.378					2.048					2.141
		1.297					1.527					1.202
		1.149					1.124					0.905
		0.876					1.294					1.224
		1.646					1.295					1.366
		1.136					1.217					1.633
		1.444					1.298					2.165
		1.306					1.169					1.826
		1.14					1.112					1.173
		1.108					0.791					2.013
		1.603					1.181					2.282
		1.353					1.093					1.837
		1.098					1.072					1.044
		1.34					0.955					1.357
		1.514					0.774					2.123
		1.175					1.071					1.29
		1.146					1.828					1.489
		1.234					0.827					1.912
		1.212					1.239					1.417
		1.228					2.179					3.152
		2.837					0.988					1.556
		1.019					1.952					0.94
		0.9					1.556					1.571
		1.264					1.833					1.15
		1.337					2.048					1.016
		1.136					1.519					1.05
		1.329					1.677					1.221
		1.074					1.676					1.13
		1.599					1.127					1.437
		1.138					1.29					1.046
		1.188					1.232					1.505
		0.948					0.776					0.673
		0.821					2.105					2.402
		0.794					1.371					2.05
		1.18					0.792					1.926
		1.157					2.056					2.366
		1.015					0.892					1.495
		1.14					2.163					1.114
		1.569					1.232					0.968
		1.581					1.429					1.427
		1.129					1.15					1.292
		1.684					2.166					0.799
		2.248					1.303					1.297
		0.95					1.007					1.199
		1.229					1.071					1.072
		0.899					0.977					2.111
		1.328					1.279					1.415
		0.839					1.036					0.94
		0.881					1.247					1.012
		1.267					1.027					1.332
		1.037					1.759					0.884
		1.38					0.869					1.112
		1.13					1.086					1.354
		1.056					1.109					2.147
		0.963					1.212					1.186
		1.398					1.677					1.201
		1.619					0.988					1.54
		1.192					1.51					1.56
		1.173					1.215					0.638
		2.483					1.376					0.685
		1.261					2.031					1.216
		1.049					1.422					1.067
		1.218					1.137					0.822
		0.954					1.476					1.376
		0.669					0.801					2.184
		0.772					1.694					0.974
		0.833					1.228					0.896
		1.688					1.515					2.211
		1.782					1.299					1.125
		1.369					1.146					1.721
		1.203					1.328					1.426
		1.168					1.422					0.717
		1.706					1.295					1.967
		0.957					0.982					1.354
		1.46					1.825					1.462
		0.74					0.998					2.072
		1.251					0.943					0.659
		1.29					0.731					1.262
		0.789					0.954					1.219
		2.275					0.586					1.322
		0.831					1.711					1.525
		1.518					1.047					1.378
		1.3					1.184					1.175
		1.882					1.025					2.589
		1.635					1.335					1.898
		1.343					1.595					1.273
		1.537					1.279					1.172
		0.889					1.329					1.656
		0.842					1.27					1.667
		0.716					1.145					1.243
		1.677					1.252					1.012
		1.435					0.892					1.048
		1.581					1.952					1.294
		1.457					2.204					1.772
		1.204					1.329					1.841
		1.865					0.956					0.851
		1.284					1.33					1.211
		1.706					1.219					1.681
		2.058					1.017					1.388
		0.815					2.304					1.979
		1.228					0.905					0.942
		1.696					1.421					0.765
		1.086					0.807					0.986
		0.945					1.113					1.012
		1.044					1.017					1.269
		1.161					1.354					2.014
		1.579					1.389					0.777
		1.165					1.417					0.777
		1.773					1.094					1.534
		1.164					1.065					1.65
		2.676					1.328					1.522
		1.063					1.391					1.118
		1.125					1.354					1.614
		1.287					1.278					0.968
		1.089					1.067					1.071
		1.034					1.171					1.195
		0.772					0.96					1.462
		1.114					1.864					1.567
		1.133					1.274					1.072
		1.401					1.242					1.171
		1.238					1.121					0.993
		1.877					0.626					1.464
		1.28					1.387					1.41
		1.579					0.98					1.884
		0.826					1.513					1.303
		1.417					1.545					1.102
		0.933					1.37					1.449
		1.247					0.815					1.702
		3.742					1.096					1.324
		1.361					0.772					1.238
		1.839					0.541					1.59
		1.333					1.124					1.684
		2.1					0.937					1.21
		2.787					1.076					1.788
		1.035					1.323					1.045
		1.459					0.907					1.335
		0.808					1.07					1.592
		1.185					1.382					1.766
		1.298					1.047					1.387
		0.998					0.834					2.809
		1.531					1.418					1.125
		1.571					0.896					1.162
		1.881					0.944					1.128
		1.427					1.885					1.174
		1.351					1.549					1.384
		1.58					0.958					1.95
		2.562					1.724					1.936
		1.692					1.002					0.912
		1.661					1.36					0.631
		1.037					1.407					0.942
		2.105					1.342					1.19
		1.46					0.81					1.701
		0.837					1.586					1.597
		0.892					1.786					1.294
		0.878					1.478					1.377
		0.669					0.855					2.115
		1.067					1.197					0.972
		1.088					1.505					1.206
		1.017					1.418					0.838
		1.03					1.465					1.802
		1.431					1.119					1.287
		1.565					1.432					0.931
		1.066					0.997					2.524
		1.22					1.335					1.45
		1.971					1.12					0.75
		2.004					1.259					0.638
		1.189					1.803					1.285
		1.224					0.92					1.323
		0.853					1.013					1.509
		1.266					0.988					3.075
		1.09					1.494					0.883
		1.006					0.858					0.782
		2.088					0.81					0.649
		1.387					1.029					1.97
		1.39					0.933					2.113
		1.249					1.204					1.804
		1.54					1.56					1.273
		1.132					0.994					2.901
		1.038					0.946					2.063
		0.888					1.161					3.23
		1.321					1.162					0.749
		1.122					1.209					0.795
		0.792					2.372					1.069
		0.888					1.228					0.88
		0.462					1.043					1.47
		2.121					1.113					1.142
		1.178					1.302					2.037
		0.852					1.46					1.412
		1.729					0.84					1.021
		1.028					0.948					1.077
		0.935					0.685					1.599
		0.994					1.444					0.772
		1.419					1.21					1.283
		1.053					1.407					1.272
		0.801					1.608					1.283
		1.144					1.274					1.358
		1.28					1.222					1.682
		1.219					0.939					1.322
		1.274					1.029					0.747
		1.536					1.15					1.304
		0.996					1.273					1.479
		0.918					1.22					1.115
		1.278					1.066					0.904
		0.903					1.42					1.211
		1.326					1.111					0.766
		2.202					2.015					1.136
		1.477					1.69					1.758
		1.003					1.827					2.5
		1.782					1.986					2.69
		1.153					1.17					0.804
		1.856					0.867					1.481
		1.162					1.752					2.653
		1.769					0.843					1.284
		1.927					1.473					1.562
		1.515					2.143					0.854
		0.912					1.801					1.821
		1.406					1.159					0.96
		1.275					1.77					2.003
		2.386					1.28					1.863
		1.353					1.045					1.409
		1.074					1.327					1.291
		2.008					1.092					2.203
		1.918					2.065					2.086
		1.321					1.649					1.525
		1.148					1.393					2.748
		0.677					0.756					1.583
		0.922					1.259					1.288
		1.085					1.119					2.134
		1.454					1.694					2.018
		0.787					1.586					1.521
		0.984					2.184					0.944
		1.594					2.461					1.575
		2.397					2.935					0.714
		1.123					1.362					1.949
		1.07					1.855					1.657
		0.868					1.542					1.361
		1.425					1.317					1.278
		1.021					1.354					0.932
		1.206					1.508					2.414
		1.444					1.01					1.187
		1.335					1.339					1.227
		0.88					1.019					1.742
		2.016					1.058					1.271
		1.646					1.365					0.897
		2.531					1.309					1.459
		1.196					1.17					0.769
		1.114					1.665					1.941
		1.303					1.231					1.338
		1.594					1.92					1.424
		1.965					2.447					1.245
		2.036					1.144					1.408
		1.565					1.614					0.792
		1.741					0.793					1.535
		1.086					1.328					1.039
		1.362					1.069					1.77
		0.89					1.035					2.408
		2.014					1.203					2.49
		1.576					1.311					1.306
		1.099					1.693					1.328
		1.428					1.022					1.533
		1.21					1.055					1.644
		1.082					1.861					1.49
		1.597					0.878					3.073
		2.297					1.475					2.018
		1.678					1.01					1.197
		1.299					1.418					1.758
		1.244					0.983					1.652
		1.887					1.316					1.198
		1.198					0.793					0.777
		1.024					2.363					1.392
		2.922					2.003					1.289
		1.318					1.086					1.207
		1.048					1.37					1.009
		0.93					1.369					2.594
		0.665					1.267					1.575
		1.521					1.67					1.514
		0.972					1.291					1.884
		1.407					1.047					2.22
		1.977					1.597					1.524
		1.182					1.109					1.017
		1.62					0.995					1.143
		1.473					1.437					1.077
		1.302					0.914					1.304
		1.027					0.951					1.452
		1.508					0.88					1.219
		1.482					1.244					1.152
		1.175					1.553					1.845
		1.872					1.071					0.734
		1.95					1.178					1.339
		1.628					1.066					1.786
		1.237					1.307					0.905
		0.95					2.057					0.537
		0.474					0.98					1.623
		1.373					1.303					0.79
		2.347					0.485					1.137
		1.397					1.108					1.397
		1.191					1.15					0.993
		1.797					1.598					2.465
		1.767					1.169					2.639
		1.774					0.766					2.851
		0.921					1.189					0.816
		0.781					1.634					1.289
		0.633					1.17					1.492
		0.998					1.459					1.671
		1.099					1.017					1.357
		2.061					1.359					1.451
		1.535					1.666					1.54
		0.948					1.136					1.549
		1.167					0.813					3.015
		0.619					1.105					1.658
		1.459					1.065					1.467
		1.443					1.347					1.074
		1.32					1.371					1.706
		1.177					1.011					1.539
		1.033					1.049					1.379
		1.021					1.384					0.5
		0.878					0.754					1.439
		0.909					0.949					1.117
		1.597					1.251					1.173
		1.649					1.793					1.55
		2.034					1.489					1.074
		1.113					0.88					1.156
		1.783					1.364					0.996
		1.28					2.116					1.398
		1.233					1.424					1.414
		0.979					0.973					1.788
		1.005					0.81					1.128
		0.91					1.405					1.755
		1.005					1.203					2.336
		1.263					1.327					1.22
		0.848					1.393					1.663
		1.292					0.919					1.269
		1.321					1.625					2.152
		1.396					1.753					0.845
		0.903					1.781					1.244
		1.404					0.805					1.379
		1.31					0.895					1.67
		1.563					1.495					2.019
		1.364					0.926					1.178
		0.95					1.027					2.923
		1.161					1.258					1.811
		1.477					2.552					3.039
		1.105					1.643					2.14
		1.107					1.404					1.444
		0.957					1.398					1.533
		1.643					1.166					1.236
		1.686					0.608					1.34
		2.087					1.769					1.922
		1.48					2.196					1.184
		1.361					1.519					1.697
		1.621					1.186					1.413
		1.431					1.135					1.124
		2.357					1.565					0.698
		1.647					1.592					0.913
		1.358					0.764					2.741
		0.952					1.375					2.501
		0.936					0.981					1.031
		1.048					1.559					2.492
		1.271					1.048					2.124
		1.242					1.286					1.231
		1.281					0.645					1.67
		1.211					2.104					1.476
		1.025					1.334					1.229
		1.147					1.642					2.016
		0.996					0.523					0.924
		0.986					2.149					1.215
		1.226					1.19					1.086
		0.976					1.237					1.224
		0.814					1.137					1.187
		0.97					0.79					1.351
		1.457					1.059					1.624
		1.383					1.072					1.228
		1.769					1.364					1.079
		3.098					1.456					1.585
		0.992					1.459					0.895
		1.157					2.052					1.348
		1.474					1.147					1.762
		1.633					1.585					1.15
		1.491					1.243					1.45
		1.319					1.457					1.531
		1.115					1.374					1.397
		1					1.079					1.409
		1.876					0.763					1.388
		1.14					1.309					2.265
		1.343					1.542					1.302
		1.136					1.529					1.585
		1.01					0.786					1.522
		1.269					1.738					1.443
		1.207					1.621					1.106
		1.353					0.933					2.061
		0.934					1.548					1.924
		0.983					1.309					1.249
		1.283					1.411					1.589
		0.998					1.227					3.343
		1.349					1.209					1.539
		1.138					1.712					2.865
		0.822					0.984					1.618
		1.16					1.51					1.678
		1.265					1.031					2.336
		1.302					1.348					2.395
		1.146					1.123					1.835
		1.094					1.395					1.343
		1.014					1.542					1.176
		1.409					1.309					1.479
		1.443					1.636					1.105
		1.263					1.55					0.805
		1.235					0.873					1.491
		0.982					1.447					1.293
		1.313					1.129					0.694
		0.947					1.675					1.194
		0.941					1.237					1.758
		0.775					0.69					1.469
		0.881					1.445					1.346
		1.432					1.561					1.446
		1.265					1.078					1.631
		1.131					1.155					1.808
		1.258					1.535					1.161
		1.476					1.001					1.135
		1.073					1.87					1.287
		1.498					2.5					0.864
		0.994					0.865					1.681
		1.376					1.225					1.415
		1.098					1.099					1.808
		1.129					1.006					1.278
		1.269					1.444					1.684
		1.325					1.116					1.198
		1.54					1.452					1.35
		1.319					1.242					1.693
		0.706					1.026					2.823
		1.204					1.301					1.803
		1.31					1.373					1.549
		1.496					1.547					2.341
		1.029					1.269					1.447
		1.18					1.372					1.574
		1.623					1.288					1.33
		0.697					1.235					1.419
		0.936					0.926					1.136
		1.128					1.366					1.909
		1.421					1.186					2.089
		0.787					1.289					1.383
		1.242					1.261					1.393
		2.668					1.482					1.197
		2.022					1.236					1.562
		1.813					0.843					1.082
		1.086					1.416					1.211
		1.47					1.082					1.36
		1.17					1.362					1.483
		1.652					1.28					1.161
		1.524					1.963					0.808
		1.52					0.869					1.627
		4.556					1.091					1.659
		1.561					1.621					1.056
		1.196					0.663					0.832
		2.168					1.114					1.235
		1.11					1.295					1.461
		0.764					1.098					1.588
		1.268					1.469					2.06
		0.814					1.478					1.097
		0.782					1.451					0.863
		1.42					0.852					0.777
		1.388					1.034					1.765
		1.175					1.089					1.513
		0.568					1.154					0.975
		1.443					1.571					0.831
		0.83					1.045					0.849
		1.4					0.751					1.485
		1.05					1.406					1.473
		0.461					2.391					1.292
		1.001					1.183					1.323
		0.699					1.002					1.437
		1.28					0.927					1.62
		1.264					1.244					1.18
		1.579					1.574					1.668
		0.968					1.207					0.883
		1.329					1.271					1.438
		1.471					1.257					1.2
		1.205					1.181					1.696
		1.11					1.487					1.46
		1.492					1.601					0.995
		1.208					0.957					1.939
		1.425					1.101					1.671
		0.933					1.285					0.923
		1.262					1.479					1.708
		1.151					2.004					2.5
		1.404					1.814					1.366
		1.408					1.703					1.461
		1.192					1.175					1.146
		1.316					1.272					1.57
		1.374					1.434					1.797
		0.7					1.275					1.835
		1.42					0.957					1.447
		0.937					1.255					1.022
		1.2					1.487					1.499
		2.016					0.809					1.319
		0.949					0.658					1.296
		1.211					1.223					0.984
		0.888					1.158					1.848
		1.275					1.557					1.337
		0.975					1.489					1.143
		0.862					1.148					1.366
		1.276					1.782					1.34
		1.199					1.504					2.488
		0.83					1.623					2.792
		0.545					1.136					1.911
		0.692					1.14					1.958
		1.395					2.948					1.082
		0.983					0.975					1.985
		1.298					1.484					1.604
		1.19					1.517					0.923
		1.374					1.173					1.615
		1.564					1.568					1.693
		0.795					1.055					2.365
		1.043					0.857					0.917
		1.182					1.787					0.828
		1.299					1.17					1.299
		1.27					1.336					1.051
		1.471					1.285					1.265
		1.117					2.396					1.343
		0.863					1.589					1.521
		0.918					1.351					1.829
		1.194					1.521					1.35
		1.221					1.318					2.44
		1.484					1.185					2.517
		0.924					1.5					1.124
		1.356					1.373					1.664
		0.644					1.245					2.445
		2.457					1.501					1.291
		0.86					1.132					1.606
		1.135					0.966					0.849
		0.946					0.899					1.2
		1.272					1.302					1.716
		1.226					1.375					1.611
		1.338					1.36					1.276
		2.503					1.693					0.811
		1.216					1.526					1.159
		0.955					1.356					1.811
		1.327					1.418					1.628
		0.692					1.261					1.512
		1.272					1.995					1.353
		1.26					1.779					0.778
		1.825					1.621					1.346
		1.196					1.134					1.132
		0.96					1.273					1.308
		1.217					1.679					1.016
		1.591					1.003					0.881
		1.091					0.915					1.24
		1.087					1.469					1.76
		1.148					1.405					1.005
		0.764					1.069					1.876
		1.219					1.072					1.681
		1.277					1.642					1.438
		1.261					1.296					0.943
		0.752					1.166					1.203
		1.877					2.819					1.127
		1.166					1.25					1.51
		0.847					1.219					0.931
		1.268					0.754					1.236
		1.355					1.43					1.601
		0.801					1.956					2.011
		0.917					1.255					1.176
		1.039					1.275					3.653
		1.26					0.943					0.697
		1.311					1.492					1.518
		1.588					1.275					2.545
		1.397					0.831					1.782
		0.681					1.544					1.641
		1.073					1.593					1.109
		0.931					1.066					0.919
		0.907					1.166					1.425
		1.292					1.086					1.342
		1.376					0.864					1.315
		1.236					2.14					1.674
		0.895					1.145					1.291
		1.073					1.316					1.641
		1.166					1.298					2.725
		1.254					1.372					1.255
		1.16					1.085					1.958
		1.08					0.8					1.31
		2.416					1.315					0.858
		1.298					1.182					1.573
		0.853					1.107					2.284
		1.01					1.435					1.453
		1.117					1.085					1.564
		0.642					1.003					1.576
		0.675					1.12					1.758
		1.713					1.447					2.377
		1.319					1.41					1.227
		0.928					1.635					0.803
		0.982					1.673					0.758
		1.051					1.448					0.772
		0.777					1.44					1.43
		1.737					1.664					1.287
		1.21					1.627					1.038
		1.33					1.294					1.14
		1.233					1.343					2.498
		1.533					1.279					1.912
		1.559					0.921					2.081
		0.594					1.335					2.278
		1.256					1.063					3.063
		1.088					1.494					2.103
		0.93					1.889					1.23
		1.281					1.258					1.963
		1.449					1.387					2.95
		1.059					1.459					2.975
		1.459					1.455					2.814
		1.271					1.489					2.166
		1.058					1.372					1.244
		1.219					1.036					1.42
		0.84					1.062					1.305
		0.907					0.986					1.395
		1.24					2.122					1.164
		1.725					0.956					2.107
		1.358					1.387					2.737
		1.37					1.219					3.004
		1.556					1.402					3.219
		0.905					1.396					1.488
		1.61					1.338					3.4
		2.283					0.807					1.436
		2.263					1.44					1.287
		1.744					1.17					2.746
		1.233					0.721					1.856
		0.936					1.352					1.897
		1.151					0.816					1.461
		0.805					1.671					1.482
		1.354					1.694					1.121
		1.191					1.584					1.353
		1.338					0.583					1.525
		0.682					1.484					2.138
		1.391					0.782					3.455
		1.222					0.937					3.052
		1.228					2.062					1.373
		1.348					1.139					1.226
		1.444					1.409					1.584
		2.201					1.298					0.707
		1.389					1.484					1.873
		1.03					1.289					2.15
		1.248					1.711					1.874
		1.201					1.043					2.776
		1.599					1.048					1.333
		1.628					1.222					1.282
		1.264					0.806					1.816
		1.211					1.502					1.178
		0.862					1.61					2.512
		0.904					1.767					1.57
		0.947					1.387					1.729
		1.623					1.299					1.551
		2.365					1.302					1.261
		1.463					0.988					0.996
		1.209					1.329					1.883
		1.584					1.611					1.812
		1.582					1.477					1.155
		1.237					1.263					3.392
		1.328					0.866					0.967
		1.269					0.864					2.078
		1.475					1.158					1.736
[truncated: 3,042 more rows]
