# Supplementary material for: Concerted action of kinesins KIF5B and KIF13B promotes efficient secretory vesicle transport to microtubule plus ends
Source: eLife. 2020 Nov 11;9:e61302. doi: 10.7554/eLife.61302 (PMC7710357; doi:10.7554/eLife.61302)
Supplement: Figure 8—figure supplement 1—source data 1. [file elife-61302-fig8-figsupp1-data1.xlsx]

## Sheet: Figure 8 - Figure supplement 1
Figure 8 - Figure supplement 1
(Intensity)
		MAP7
															Control															KIF5B-KO
		Cell radius (mm)	Map7/Tub	Map7/Tub	Map7/Tub	Map7/Tub	Map7/Tub	Map7/Tub	Map7/Tub	Map7/Tub	Map7/Tub	Map7/Tub	Map7/Tub	Map7/Tub	Map7/Tub	Map7/Tub	Map7/Tub	Map7/Tub	Map7/Tub	Map7/Tub	Map7/Tub	Map7/Tub	Map7/Tub	Map7/Tub	Map7/Tub	Map7/Tub	Map7/Tub	Map7/Tub		Map7/Tub	Map7/Tub	Map7/Tub	Map7/Tub	Map7/Tub	Map7/Tub	Map7/Tub	Map7/Tub	Map7/Tub	Map7/Tub	Map7/Tub	Map7/Tub	Map7/Tub	Map7/Tub	Map7/Tub	Map7/Tub	Map7/Tub	Map7/Tub	Map7/Tub	Map7/Tub
		0	1.20646	1.07549	1.038	0.908015	1.148	1	1.36133	1.78672	1.25107	1.22825	1.44653	0.854392	1.02953	0.975957	1.38655	1.07549	1.06862	1.01772	1.00139	1.01694	1.24689	0.99553	1.0104	1.00316	0.98094	1.0039		1.18997	1.14807	1.20245	1.01904	1.34026	1.11438	1.39772	1.27898	1.05243	1.5016	1.18625	0.947882	1.35854	1.34751	1.17478	1.28725	1.07742	1.15744	1.06866	1.07426
		0.072	1.22215	1.06466	1.049	0.907372	1.16341	0.988796	1.31409	1.77239	1.2342	1.22687	1.44619	0.869967	1.01791	0.992034	1.37612	1.06466	1.05805	0.995754	0.998197	1.00317	1.26387	0.994124	0.99092	1.01165	0.993458	0.98594		1.18126	1.14587	1.1873	1.00895	1.28087	1.12091	1.37799	1.17001	1.09748	1.40823	1.1879	0.958327	1.34069	1.29606	1.17401	1.26266	1.07669	1.15664	1.07515	1.06681
		0.144	1.19425	1.06859	1.052	0.920923	1.16986	0.996647	1.28505	1.76981	1.21906	1.23138	1.46187	0.89323	1.00837	0.985984	1.29628	1.06859	1.04139	0.989793	1	0.999474	1.26133	0.978037	0.991438	1.02439	0.988022	0.990805		1.13382	1.13955	1.17236	0.994718	1.25074	1.1327	1.35625	1.14076	1.08208	1.39301	1.19838	0.965135	1.30716	1.27995	1.1618	1.26961	1.0803	1.15075	1.08762	1.06207
		0.216	1.20108	1.07035	1.065	0.92118	1.16069	0.997965	1.28898	1.78086	1.20913	1.2419	1.47469	0.91314	1.00285	0.962831	1.27645	1.07035	1.02328	1.00723	1.00251	0.995658	1.25119	0.980678	0.981146	1.04299	0.992609	0.996665		1.09278	1.11892	1.14705	1.00804	1.23128	1.12276	1.35864	1.0888	1.06567	1.44086	1.19158	0.992843	1.30722	1.28748	1.1689	1.26964	1.07559	1.15069	1.06402	1.08055
		0.288	1.16347	1.08642	1.062	0.928733	1.16406	0.997582	1.30466	1.78405	1.2265	1.22757	1.4753	0.924472	0.997027	0.950399	1.26328	1.08642	1.02303	1.0149	1.01247	0.997613	1.24398	0.986689	0.970379	1.03416	1.01305	1.01456		1.08961	1.09331	1.16284	1.0049	1.21622	1.04319	1.35143	1.13734	1.06364	1.48278	1.2009	0.994093	1.34205	1.31064	1.14929	1.25822	1.07066	1.1479	1.07832	1.08065
		0.36	1.10212	1.07614	1.07	0.904935	1.16058	0.998473	1.32567	1.74869	1.22557	1.23887	1.45434	0.951484	0.992171	0.944905	1.24716	1.07614	1.00657	1.00335	1.00488	0.984196	1.23652	0.991483	0.960645	1.0319	1.02813	1.02297		1.08016	1.06887	1.15839	1.00288	1.19654	1.03976	1.36243	1.1435	1.06353	1.52006	1.16172	0.99355	1.34609	1.3135	1.14934	1.25254	1.0677	1.12711	1.08877	1.06243
		0.432	1.09478	1.07316	1.082	0.917263	1.15214	0.993778	1.2984	1.74922	1.23133	1.25527	1.42513	0.981276	0.966009	0.940087	1.2356	1.07316	1.00551	1.01113	0.995345	0.982886	1.2292	1.0107	0.975693	1.02913	1.02821	1.02284		1.08243	1.06245	1.1501	0.990135	1.26141	1.01974	1.40787	1.18449	1.0554	1.46379	1.13658	0.989005	1.3505	1.30847	1.11314	1.24422	1.0626	1.11836	1.09404	1.06894
		0.504	1.12428	1.05679	1.084	0.916537	1.15847	0.976074	1.28645	1.78547	1.20806	1.25387	1.41899	0.994405	0.955933	0.918265	1.22547	1.05679	1.00576	1.01955	0.984885	0.981231	1.21253	1.01499	0.977568	1.03012	1.01341	1.01527		1.05341	1.04877	1.16219	0.986008	1.29978	1.02703	1.41304	1.19907	1.06341	1.42723	1.09986	1.00282	1.33832	1.30264	1.11117	1.21833	1.05013	1.10816	1.0793	1.08216
		0.576	1.13864	1.05136	1.083	0.923924	1.15483	0.978085	1.27805	1.80167	1.19524	1.2507	1.44165	0.998751	0.953273	0.898609	1.20663	1.05136	1.00874	0.993746	0.98469	0.982825	1.21351	1.01667	0.981018	1.02259	1.01855	1.02379		1.04705	1.04779	1.16663	0.972336	1.33475	1.02798	1.39187	1.17189	1.05306	1.40786	1.08122	1.00485	1.33692	1.31833	1.10223	1.21203	1.03513	1.09872	1.06692	1.07559
		0.648	1.18658	1.03375	1.086	0.933007	1.1541	0.955084	1.26583	1.79734	1.19439	1.24216	1.42498	1.00147	0.955516	0.870974	1.21412	1.03375	1.00537	0.976507	0.979974	0.985011	1.20244	1.01479	0.992722	1.01568	1.01676	1.03676		1.04394	1.05203	1.17345	0.982045	1.33452	1.01704	1.36579	1.20228	1.0439	1.44574	1.06297	0.996098	1.37286	1.31072	1.12134	1.18663	1.03161	1.09896	1.07006	1.06615
		0.72	1.25425	1.02036	1.084	0.931432	1.15134	0.943824	1.2548	1.76618	1.19016	1.22459	1.40644	1.00253	0.962761	0.854408	1.21604	1.02036	1.00332	0.964611	0.975923	0.987023	1.18795	1.02138	0.999246	1.00728	1.02702	1.032		1.03828	1.02939	1.18014	0.986628	1.34791	1.02412	1.34409	1.18718	1.03162	1.47536	1.04002	0.973809	1.35719	1.31709	1.10425	1.17624	1.02642	1.08163	1.06052	1.0631
		0.792	1.28076	1.02438	1.085	0.927018	1.15314	0.925473	1.24875	1.76914	1.17115	1.20712	1.40184	1.0153	0.949927	0.865416	1.22827	1.02438	0.99847	0.969965	0.972203	0.987314	1.17972	1.02751	1.00302	1.00723	1.02915	1.04355		1.0229	1.02368	1.19134	0.991739	1.32605	1.03339	1.36271	1.19663	1.02906	1.46677	1.03357	0.966934	1.35247	1.32157	1.08999	1.15386	1.02132	1.07705	1.03874	1.07213
		0.864	1.26604	1.03248	1.104	0.92287	1.14731	0.912525	1.24712	1.78609	1.1444	1.21535	1.38968	1.01876	0.943446	0.845147	1.22956	1.03248	1.00096	0.976044	0.975567	0.978064	1.16479	1.03721	1.00503	0.997863	1.01813	1.05869		1.03111	1.01937	1.20762	0.989287	1.34335	1.04237	1.3938	1.1998	1.02062	1.48941	1.03636	0.963263	1.33065	1.32366	1.08817	1.13103	1.02593	1.08788	1.05514	1.08734
		0.936	1.27745	1.04338	1.112	0.937254	1.14926	0.912968	1.229	1.76344	1.1181	1.22367	1.38781	1.02884	0.948714	0.850467	1.23048	1.04338	0.995488	0.987264	0.988634	0.972188	1.15628	1.0328	1.00292	1.00209	1.01251	1.06082		1.0272	1.03067	1.21674	0.983653	1.32184	1.04962	1.41493	1.20046	1.01197	1.50989	1.04181	0.957322	1.32579	1.32021	1.07679	1.1131	1.01912	1.05624	1.03936	1.07305
		1.008	1.24872	1.04219	1.11	0.945164	1.14682	0.901132	1.22456	1.76493	1.11087	1.21798	1.38359	1.03326	0.94841	0.846639	1.21246	1.04219	0.991515	0.974482	0.996286	0.962183	1.15027	1.03126	0.992453	1.00564	1.00698	1.0436		1.01595	1.02127	1.21077	0.971039	1.3413	1.05117	1.43453	1.22493	0.990524	1.53712	1.04503	0.958449	1.31866	1.32416	1.06075	1.11452	1.02442	1.05777	1.025	1.07342
		1.08	1.23281	1.0324	1.104	0.949018	1.14426	0.893083	1.21656	1.78992	1.10069	1.20853	1.39244	1.03947	0.938871	0.847432	1.20169	1.0324	0.990983	0.962186	0.999697	0.954568	1.15253	1.03122	0.983251	1.00086	1.013	1.0431		1.0099	1.01926	1.20618	0.955612	1.35647	1.05143	1.43855	1.22658	0.976519	1.55022	1.04046	0.963276	1.30341	1.3194	1.0481	1.10777	1.01767	1.05279	1.01841	1.07723
		1.152	1.22493	1.02261	1.111	0.946487	1.14674	0.886398	1.22307	1.81165	1.09536	1.20993	1.39344	1.04704	0.945118	0.84968	1.20365	1.02261	0.984288	0.96084	0.992893	0.951156	1.15042	1.02803	0.975571	0.993318	1.02154	1.06322		1.00364	1.01777	1.21296	0.945261	1.34566	1.04807	1.39148	1.21437	0.970018	1.52044	1.03106	0.966083	1.28969	1.3131	1.03068	1.10135	1.01867	1.03587	1.02835	1.07568
		1.224	1.21291	1.00838	1.111	0.950093	1.14182	0.881639	1.21048	1.79443	1.0897	1.20685	1.38706	1.04238	0.931668	0.839536	1.21866	1.00838	0.98172	0.962144	0.995456	0.951485	1.14316	1.03579	0.96206	0.987396	1.02789	1.06934		1.00095	1.00431	1.22588	0.938974	1.35696	1.03102	1.37845	1.20606	0.965688	1.49466	1.01649	0.96777	1.24481	1.30128	1.01238	1.09968	1.01203	1.03959	1.04874	1.07503
		1.296	1.2126	1.0009	1.104	0.960954	1.1357	0.866884	1.19022	1.781	1.08902	1.20277	1.3854	1.04033	0.951352	0.86141	1.20792	1.0009	0.978261	0.950646	0.991501	0.953473	1.14611	1.03273	0.961878	0.989489	1.03485	1.05676		1	1.01225	1.24615	0.938759	1.33433	1.02428	1.37141	1.18532	0.956222	1.49191	1.01343	0.984824	1.23034	1.29542	0.996769	1.09739	1.00816	1.03261	1.04664	1.0707
		1.368	1.21166	0.996276	1.101	0.958702	1.12742	0.864011	1.16346	1.7817	1.0705	1.19912	1.38978	1.05032	0.952346	0.877712	1.19163	0.996276	0.972665	0.946175	0.998639	0.952854	1.14693	1.04004	0.95356	0.993225	1.03288	1.05727		1.00948	1.00807	1.25004	0.94795	1.32886	1.00801	1.35111	1.18287	0.954058	1.47445	1.00364	0.994514	1.21898	1.29041	0.986354	1.09621	1.00449	1.03031	1.03615	1.06595
		1.44	1.20759	0.99619	1.097	0.945641	1.12462	0.869128	1.15025	1.76149	1.06653	1.19267	1.37973	1.04289	0.944781	0.91228	1.17393	0.99619	0.977299	0.944349	0.998448	0.949417	1.1493	1.03969	0.945611	0.995855	1.03915	1.06342		1.01777	1.00911	1.26441	0.954808	1.33477	1.00368	1.33577	1.17422	0.951944	1.4756	0.998373	0.985051	1.19966	1.28216	0.986002	1.10935	1	1.02586	1.03612	1.05993
		1.512	1.20635	0.985688	1.094	0.947774	1.11774	0.86546	1.14013	1.75415	1.06054	1.18546	1.36865	1.05169	0.945041	0.942465	1.15415	0.985688	0.983992	0.938849	0.993212	0.944325	1.14656	1.03781	0.945888	0.984039	1.05038	1.06275		1.02259	1.0093	1.24723	0.944927	1.3159	1.00199	1.35033	1.17526	0.950787	1.4888	0.998936	0.968631	1.19151	1.26903	0.983706	1.11949	1.00066	1.01385	1.02243	1.06088
		1.584	1.19717	0.981098	1.091	0.943302	1.1192	0.862159	1.14296	1.78205	1.05113	1.1828	1.35503	1.06018	0.939416	0.949955	1.15427	0.981098	0.987213	0.929346	0.995297	0.947354	1.14594	1.04024	0.944283	0.974407	1.05555	1.07575		1.02575	1.00552	1.23373	0.937417	1.31873	1.00434	1.33291	1.17251	0.958199	1.50244	0.998428	0.96712	1.18406	1.26231	0.974238	1.1125	0.996994	1.00315	0.992883	1.06357
		1.656	1.18267	0.978856	1.082	0.93478	1.117	0.85366	1.14147	1.78777	1.05743	1.17261	1.34552	1.05697	0.947524	0.967254	1.1405	0.978856	0.991155	0.923433	0.996569	0.952425	1.14737	1.03135	0.934722	0.97346	1.05835	1.0778		1.03462	0.995099	1.24246	0.942003	1.31258	0.99848	1.32812	1.17562	0.957677	1.52469	0.998161	0.963698	1.18834	1.25925	0.972029	1.10348	0.99587	0.985995	0.985562	1.06118
		1.728	1.17413	0.957847	1.074	0.933531	1.12136	0.841654	1.12744	1.78812	1.0523	1.1666	1.34194	1.06012	0.956378	0.976667	1.14568	0.957847	0.987992	0.927436	1.00017	0.95171	1.13925	1.03034	0.933708	0.969172	1.06132	1.07883		1.03874	0.989599	1.23461	0.950694	1.32536	1.00351	1.31055	1.17092	0.96132	1.54511	0.987261	0.967333	1.18728	1.27105	0.969444	1.09261	0.989019	0.972306	0.97848	1.06501
		1.8	1.1668	0.951454	1.071	0.940129	1.11407	0.829847	1.10675	1.79827	1.04407	1.16306	1.32932	1.05835	0.951981	0.996951	1.13985	0.951454	0.968816	0.933036	1.00567	0.94776	1.12752	1.02234	0.931973	0.969132	1.06221	1.08873		1.0347	0.981027	1.24136	0.957448	1.30773	1.00712	1.28097	1.15586	0.96067	1.55172	0.990028	0.966529	1.1805	1.28202	0.966029	1.09171	0.9879	0.96475	0.968617	1.07391
		1.872	1.14512	0.941544	1.066	0.940251	1.1134	0.819483	1.08416	1.82307	1.04145	1.16012	1.31154	1.06899	0.962158	1.00879	1.15178	0.941544	0.965088	0.935608	1.00619	0.944528	1.12159	1.01813	0.924959	0.959974	1.06219	1.09291		1.01995	0.976525	1.25013	0.966809	1.28491	1.00486	1.27005	1.14468	0.95796	1.53732	0.980852	0.967101	1.1765	1.29188	0.970654	1.07782	0.981933	0.962076	0.95229	1.0777
		1.944	1.13005	0.938256	1.058	0.941985	1.11294	0.817194	1.06785	1.79113	1.02817	1.16176	1.30338	1.06528	0.954974	1.01463	1.15456	0.938256	0.967244	0.939899	1.00805	0.944444	1.11822	1.01534	0.922912	0.951794	1.05259	1.09791		1.00909	0.968888	1.24672	0.960488	1.2709	1.00319	1.28001	1.12916	0.956672	1.5344	0.975027	0.96601	1.17117	1.29317	0.973214	1.07415	0.97703	0.94846	0.9553	1.08222
		2.016	1.12124	0.934436	1.058	0.935915	1.11909	0.812427	1.05733	1.76027	1.01397	1.15614	1.28954	1.06107	0.96994	1.03634	1.15021	0.934436	0.967903	0.9269	1.00927	0.936958	1.11608	1.01558	0.920164	0.950103	1.04121	1.0907		1.00302	0.965524	1.2484	0.960501	1.28133	1.0038	1.29205	1.11794	0.968291	1.52519	0.988174	0.963731	1.15353	1.28533	0.96384	1.08073	0.975718	0.936728	0.964219	1.07866
		2.088	1.13073	0.925467	1.063	0.941228	1.10797	0.806038	1.04256	1.78447	1.0004	1.15447	1.27921	1.06265	0.970756	1.03132	1.14148	0.925467	0.983232	0.912906	1.01172	0.932789	1.10995	1.00679	0.924159	0.943738	1.04091	1.08361		0.992708	0.96335	1.24269	0.966293	1.27829	1.00555	1.29566	1.11874	0.96255	1.50612	0.997338	0.968221	1.14564	1.289	0.963444	1.07597	0.97065	0.923508	0.971079	1.08161
		2.16	1.12881	0.914337	1.059	0.942163	1.10895	0.799625	1.03751	1.7879	0.988287	1.14606	1.26389	1.05419	0.977185	1.03702	1.13197	0.914337	0.977485	0.897862	1.0062	0.926094	1.10285	1.00452	0.919856	0.950637	1.04149	1.07864		0.982954	0.959513	1.24405	0.979508	1.28757	1.00392	1.28876	1.11449	0.96982	1.48858	1.01857	0.96867	1.13703	1.28208	0.962383	1.07821	0.969826	0.917301	0.965494	1.07581
		2.232	1.1344	0.905543	1.049	0.954938	1.10668	0.791262	1.02814	1.79964	0.985024	1.13213	1.25122	1.06169	0.975727	1.04884	1.1202	0.905543	0.982539	0.898892	0.997617	0.932405	1.10023	0.99502	0.915966	0.950453	1.04557	1.07835		0.969811	0.956833	1.23912	0.985584	1.28309	1	1.28432	1.10323	0.967045	1.49297	1.02466	0.970649	1.12275	1.27268	0.965971	1.06999	0.966157	0.911679	0.955896	1.066
		2.304	1.13125	0.904926	1.045	0.959731	1.10519	0.787195	1.01071	1.78813	0.98249	1.13038	1.24194	1.05289	0.984095	1.04806	1.12922	0.904926	0.96712	0.912388	0.983335	0.931713	1.09545	0.99522	0.915258	0.956336	1.05372	1.07517		0.968827	0.954962	1.24328	0.9866	1.28356	0.996261	1.28921	1.10171	0.966498	1.48654	1.02988	0.977069	1.12821	1.26821	0.964266	1.08191	0.963316	0.912535	0.951151	1.05862
		2.376	1.12956	0.898592	1.039	0.972194	1.09922	0.786176	0.986445	1.79238	0.965373	1.13688	1.24034	1.05703	0.979368	1.04869	1.12885	0.898592	0.96325	0.914407	0.972257	0.926218	1.08589	0.999122	0.912762	0.957782	1.05352	1.06774		0.973459	0.954393	1.23783	0.987031	1.28911	0.984358	1.28123	1.09778	0.951072	1.48473	1.02923	0.97841	1.12709	1.26249	0.961683	1.08885	0.960341	0.90413	0.945038	1.05542
		2.448	1.11791	0.888809	1.033	0.980454	1.09663	0.778225	0.962435	1.79623	0.94447	1.13535	1.23728	1.08743	0.969194	1.04639	1.12338	0.888809	0.960067	0.922673	0.970186	0.922311	1.08122	0.995408	0.902469	0.948971	1.0559	1.07026		0.9725	0.959055	1.24175	0.996884	1.29072	0.9733	1.26987	1.08149	0.945153	1.4833	1.02993	0.978577	1.12676	1.2544	0.968965	1.08506	0.958006	0.903395	0.93759	1.05035
		2.52	1.12056	0.882233	1.033	0.978285	1.09185	0.774065	0.952155	1.77268	0.931142	1.11923	1.22287	1.08375	0.984951	1.03062	1.11472	0.882233	0.950547	0.923049	0.968304	0.931647	1.07515	0.994756	0.894104	0.945029	1.0623	1.06183		0.971175	0.964333	1.23174	1.00877	1.29168	0.965419	1.25316	1.07647	0.954025	1.4841	1.02866	0.973444	1.12252	1.23771	0.979529	1.0764	0.958684	0.905258	0.93715	1.03515
		2.592	1.1027	0.875461	1.033	0.990525	1.08116	0.765907	0.933658	1.73009	0.920736	1.11884	1.2128	1.09492	0.973005	1.03423	1.10001	0.875461	0.952824	0.920474	0.972469	0.935082	1.06385	0.984482	0.887675	0.936122	1.06412	1.05214		0.971029	0.966929	1.23343	1.01286	1.28717	0.960555	1.24646	1.05217	0.940148	1.48139	1.01225	0.976755	1.09982	1.22301	0.984144	1.06446	0.952848	0.904446	0.938946	1.02769
		2.664	1.09699	0.867835	1.026	0.986018	1.07961	0.761663	0.933877	1.70208	0.916346	1.11379	1.19842	1.08357	0.972701	1.01478	1.09052	0.867835	0.943957	0.918789	0.967249	0.933266	1.06407	0.976061	0.886575	0.936642	1.05971	1.04825		0.969058	0.968945	1.23319	1.02381	1.29733	0.964069	1.25191	1.04344	0.941091	1.49507	1.01197	0.979742	1.09606	1.21224	0.992498	1.06003	0.959471	0.907374	0.948093	1.0202
		2.736	1.0939	0.865149	1.024	0.997002	1.07968	0.754866	0.928603	1.74915	0.911145	1.10875	1.18619	1.10093	0.959025	1.0105	1.07603	0.865149	0.947602	0.916661	0.970277	0.928876	1.06596	0.974384	0.879283	0.929371	1.0608	1.04467		0.958624	0.965056	1.23385	1.03367	1.30452	0.969186	1.26146	1.02647	0.933804	1.51355	1.01555	0.985224	1.07323	1.20491	0.995935	1.06374	0.956562	0.907856	0.950881	1.00773
		2.808	1.08409	0.859345	1.026	1.00187	1.07175	0.749533	0.928646	1.7741	0.89912	1.10742	1.17741	1.11746	0.954293	1.00012	1.06955	0.859345	0.945338	0.914167	0.965569	0.923425	1.06817	0.972899	0.87021	0.926597	1.06857	1.03867		0.953898	0.959865	1.23165	1.04225	1.30494	0.957006	1.26855	1.0054	0.931086	1.51372	1.0185	0.98788	1.06261	1.1994	0.996358	1.06488	0.952211	0.913883	0.946357	0.996859
		2.88	1.06623	0.854405	1.026	0.992362	1.07547	0.748634	0.933678	1.7679	0.897087	1.10526	1.17003	1.1106	0.961354	0.983548	1.07251	0.854405	0.945289	0.916557	0.962401	0.937285	1.06031	0.97625	0.868545	0.927458	1.06791	1.02418		0.949801	0.955115	1.23592	1.05577	1.29152	0.959445	1.24613	0.993823	0.935431	1.48187	1.00853	0.98589	1.04609	1.19221	1.0011	1.07099	0.947044	0.916762	0.941861	0.990615
		2.952	1.05959	0.857589	1.022	0.991666	1.07161	0.747462	0.934115	1.7546	0.886314	1.11149	1.17	1.11565	0.97524	0.989295	1.06729	0.857589	0.955882	0.921713	0.954518	0.935798	1.05073	0.973081	0.862661	0.923351	1.06412	1.02875		0.954539	0.954507	1.2388	1.06593	1.30225	0.955217	1.2437	0.984453	0.926481	1.4769	0.994719	0.994462	1.03241	1.181	1.00697	1.07179	0.93956	0.918083	0.931192	0.985944
		3.024	1.06611	0.856623	1.018	0.976661	1.07063	0.740884	0.925518	1.74953	0.879832	1.11589	1.17018	1.10885	0.985287	1.01437	1.06721	0.856623	0.946505	0.927461	0.960954	0.944014	1.03597	0.97111	0.859478	0.92335	1.06189	1.03301		0.943735	0.950612	1.23221	1.07156	1.30709	0.96317	1.24849	1.00091	0.926113	1.48545	0.987931	0.999914	1.02232	1.18096	1.01665	1.07923	0.943082	0.912754	0.928367	0.983892
		3.096	1.06434	0.850334	1.017	0.980451	1.07109	0.730482	0.917934	1.75882	0.86784	1.11729	1.16413	1.11433	0.982077	1.04715	1.05975	0.850334	0.939691	0.941777	0.959586	0.934118	1.0253	0.97408	0.857285	0.911632	1.06476	1.03029		0.939006	0.950884	1.22401	1.07849	1.30743	0.957675	1.25134	0.999504	0.925769	1.4926	0.996909	0.998863	1.02063	1.17818	1.01095	1.07062	0.940932	0.910898	0.938591	0.984163
		3.168	1.06685	0.838824	1.015	0.983562	1.0705	0.725982	0.915759	1.75414	0.862217	1.12499	1.16566	1.1141	0.97656	1.08362	1.058	0.838824	0.929537	0.95173	0.960511	0.925161	1.01837	0.967668	0.857672	0.901771	1.05955	1.02137		0.933727	0.939562	1.22372	1.06751	1.30439	0.9544	1.24042	0.994226	0.926284	1.49689	1.01131	0.994821	1.01355	1.16885	1.00326	1.068	0.941971	0.9086	0.954832	0.984717
		3.24	1.06729	0.83115	1.012	0.973631	1.07238	0.720737	0.915049	1.77559	0.854608	1.13435	1.16422	1.11818	0.976643	1.10886	1.05782	0.83115	0.924131	0.953082	0.964081	0.917882	1.01832	0.964999	0.851903	0.893105	1.05143	1.01687		0.935383	0.936638	1.22892	1.0543	1.29238	0.946708	1.21357	0.978909	0.923377	1.49004	1.02386	1.00134	1.00737	1.16135	1.00047	1.06598	0.937772	0.906528	0.983535	0.987697
		3.312	1.05076	0.825851	1.009	0.970763	1.07015	0.715875	0.902087	1.79736	0.85031	1.12809	1.16026	1.1255	0.97055	1.12034	1.04664	0.825851	0.929188	0.943518	0.968214	0.910636	1.02376	0.965141	0.848528	0.881907	1.05112	1.00472		0.94035	0.933383	1.23092	1.0398	1.29005	0.943054	1.20358	0.962695	0.916184	1.45695	1.03416	1.00359	0.995326	1.15191	1.01268	1.0689	0.9327	0.909039	0.984287	0.988782
		3.384	1.04282	0.822287	0.999	0.952876	1.06697	0.717753	0.900166	1.777	0.849751	1.12223	1.15439	1.11558	0.962742	1.13125	1.04473	0.822287	0.909721	0.943283	0.968903	0.907996	1.03064	0.964291	0.850311	0.882952	1.05338	0.99833		0.923322	0.918408	1.24168	1.04307	1.2869	0.93862	1.21152	0.953298	0.910347	1.4444	1.04116	1.00803	0.998459	1.14092	0.999267	1.08147	0.932748	0.908283	0.972322	0.987797
		3.456	1.03299	0.814553	0.996	0.966382	1.0696	0.713478	0.901299	1.79297	0.837059	1.11769	1.14928	1.12695	0.952286	1.12167	1.02977	0.814553	0.906179	0.939428	0.959876	0.896567	1.0293	0.963403	0.851225	0.879062	1.06023	1.00138		0.910651	0.923407	1.24782	1.03959	1.28166	0.931945	1.22231	0.936134	0.907391	1.43926	1.04848	1.01298	0.988784	1.12931	0.996006	1.08267	0.931637	0.900959	0.947589	0.981601
		3.528	1.03154	0.811818	0.992	0.967882	1.06626	0.713644	0.90064	1.80077	0.83026	1.11849	1.14798	1.12926	0.94658	1.1216	1.02417	0.811818	0.89648	0.931127	0.952313	0.891305	1.02145	0.962148	0.856068	0.885791	1.06368	0.99439		0.908407	0.919776	1.2524	1.04177	1.26899	0.9303	1.22502	0.933875	0.911211	1.43985	1.05439	1.01088	0.988484	1.12385	0.992717	1.08818	0.940216	0.907606	0.92952	0.979523
		3.6	1.03255	0.810459	0.991	0.980752	1.06346	0.709433	0.913217	1.78072	0.821625	1.12554	1.14426	1.13268	0.925852	1.12235	1.02374	0.810459	0.895708	0.931492	0.944087	0.893414	1.01543	0.965278	0.852396	0.878497	1.06286	0.999562		0.912641	0.927272	1.25777	1.03201	1.27159	0.940012	1.21769	0.939502	0.904609	1.43078	1.0459	1.023	0.981821	1.11451	0.990755	1.09348	0.941165	0.91203	0.919495	0.979583
		3.672	1.02553	0.802843	0.988	0.995937	1.05655	0.697182	0.924398	1.79233	0.810399	1.12908	1.14572	1.13766	0.929749	1.13398	1.02134	0.802843	0.89661	0.932271	0.947503	0.885623	1.00744	0.958272	0.851343	0.880407	1.06323	0.998853		0.913933	0.932702	1.26215	1.01761	1.27274	0.94578	1.21082	0.934513	0.892974	1.41412	1.04428	1.02012	0.97903	1.09631	0.985609	1.09891	0.938189	0.90792	0.926211	0.975129
		3.744	1.01706	0.803083	0.979	0.980201	1.05316	0.695189	0.94367	1.78786	0.809313	1.13204	1.13495	1.11932	0.930825	1.14174	1.03255	0.803083	0.884781	0.935211	0.951298	0.883761	1.00871	0.953944	0.847291	0.890487	1.06595	0.98206		0.900093	0.924508	1.25519	1.01474	1.27149	0.954696	1.20008	0.9278	0.89209	1.40927	1.01961	1.01639	0.976153	1.08039	0.966705	1.10998	0.930267	0.912796	0.936851	0.971043
		3.816	1.00306	0.785505	0.974	0.982606	1.05227	0.680415	0.958858	1.82639	0.797749	1.13108	1.12822	1.13728	0.938916	1.14559	1.02878	0.785505	0.887889	0.937096	0.951751	0.878143	1.00446	0.943723	0.84182	0.887415	1.06706	0.987929		0.890698	0.935506	1.24782	1.01019	1.25595	0.953624	1.19915	0.92396	0.884923	1.40168	1.01317	1.02094	0.970808	1.06459	0.967076	1.10217	0.930719	0.912079	0.943264	0.961237
		3.888	0.995162	0.780209	0.971	0.976334	1.05096	0.675903	0.96076	1.80585	0.79278	1.13954	1.11494	1.13148	0.935426	1.11747	1.02329	0.780209	0.883677	0.931229	0.953942	0.882299	1.00517	0.940029	0.839835	0.890661	1.06452	0.984914		0.893551	0.942537	1.24419	1.00801	1.25923	0.953318	1.18234	0.929702	0.888742	1.39975	1.00126	1.02895	0.968017	1.0606	0.971579	1.10013	0.931855	0.909289	0.939476	0.958144
		3.96	0.994518	0.776059	0.966	0.98598	1.04958	0.670554	0.95929	1.81579	0.782451	1.13765	1.10176	1.15122	0.927295	1.09555	1.0228	0.776059	0.883211	0.935803	0.943123	0.879265	1.00467	0.934647	0.840089	0.893934	1.06035	1.00468		0.885918	0.950791	1.24224	1.00841	1.24625	0.950981	1.17276	0.92747	0.884738	1.39506	0.994975	1.03255	0.958704	1.052	0.961228	1.10738	0.931213	0.911243	0.923926	0.953988
		4.032	0.990186	0.771741	0.959	0.996998	1.0432	0.666	0.948303	1.82373	0.776557	1.13071	1.10264	1.16452	0.925113	1.06751	1.02077	0.771741	0.887974	0.923585	0.937218	0.871296	1.00583	0.930285	0.843265	0.895509	1.05636	1.01369		0.883915	0.950495	1.24001	1.00382	1.2393	0.95273	1.16143	0.934532	0.879087	1.39013	0.986665	1.03642	0.953069	1.04445	0.966271	1.10366	0.92646	0.923284	0.913223	0.951995
		4.104	0.998743	0.767989	0.951	0.983443	1.04136	0.66721	0.946989	1.81988	0.778406	1.12886	1.0955	1.16007	0.909675	1.02708	1.02785	0.767989	0.882697	0.910868	0.932917	0.862906	1.00559	0.930637	0.833139	0.899497	1.05674	1.01234		0.884981	0.945987	1.24076	1.00693	1.22881	0.951159	1.15	0.938252	0.880433	1.38599	0.96971	1.04396	0.946843	1.03767	0.950007	1.10467	0.919074	0.936461	0.900523	0.950297
		4.176	1.00728	0.755056	0.948	0.993437	1.04258	0.666862	0.95518	1.81332	0.763363	1.12843	1.08931	1.1707	0.903706	1.00879	1.02421	0.755056	0.880593	0.901721	0.921478	0.855332	1.00334	0.926284	0.835147	0.903493	1.05183	1.01661		0.887037	0.939428	1.23013	1.00285	1.22418	0.955998	1.15053	0.937495	0.869671	1.37226	0.971958	1.04751	0.941006	1.0255	0.955924	1.09871	0.915926	0.942655	0.910544	0.946761
		4.248	1.01254	0.750435	0.939	0.987831	1.04183	0.667082	0.95759	1.80588	0.758613	1.12925	1.0791	1.16218	0.90577	0.985329	1.01716	0.750435	0.868572	0.895222	0.919246	0.856429	0.996114	0.913239	0.828783	0.908425	1.05104	1.01382		0.883784	0.937335	1.22966	1.00841	1.21797	0.945183	1.14372	0.948488	0.871563	1.37686	0.969543	1.04541	0.939001	1.01453	0.9753	1.09664	0.91395	0.933678	0.914653	0.952461
		4.32	1.01004	0.74745	0.933	1.00274	1.03901	0.667368	0.965219	1.81354	0.748547	1.12523	1.07049	1.18469	0.906131	0.989415	1.0069	0.74745	0.869808	0.885633	0.920284	0.850965	0.993135	0.905722	0.826495	0.902758	1.05004	1.0131		0.881855	0.93499	1.22705	1.00652	1.20763	0.940412	1.13819	0.942502	0.86324	1.36675	0.979471	1.04886	0.937901	0.998658	0.983747	1.09515	0.91174	0.930117	0.899635	0.956802
		4.392	1.01035	0.748722	0.929	0.99616	1.04223	0.666933	0.960484	1.81503	0.748684	1.12673	1.05563	1.18581	0.900811	0.993719	0.993144	0.748722	0.86194	0.88143	0.93609	0.856795	0.994444	0.903121	0.830293	0.905176	1.04855	1.00109		0.884716	0.923441	1.23262	0.994194	1.20217	0.934392	1.12847	0.946086	0.867004	1.37195	0.97456	1.06094	0.945203	0.980765	0.979603	1.0942	0.905582	0.932841	0.912128	0.966265
		4.464	1.01127	0.7469	0.921	1.00112	1.04536	0.656806	0.963555	1.80531	0.74609	1.1305	1.03917	1.18719	0.889214	1.00076	0.98663	0.7469	0.852328	0.886271	0.949453	0.861008	1	0.900799	0.832234	0.91193	1.048	0.996477		0.885955	0.907462	1.2337	0.985997	1.19386	0.926523	1.115	0.939227	0.863336	1.35895	0.972064	1.07708	0.954392	0.962906	0.972212	1.10064	0.900829	0.930046	0.916251	0.960921
		4.536	0.997603	0.744868	0.914	1.00848	1.04565	0.653309	0.98069	1.80382	0.74727	1.13009	1.0302	1.19355	0.888739	1.0075	0.980132	0.744868	0.856734	0.892476	0.946955	0.86371	1.00883	0.900325	0.828064	0.909641	1.0449	0.987917		0.875723	0.898255	1.23275	0.98833	1.18035	0.920409	1.10141	0.919898	0.858289	1.36337	0.959536	1.08263	0.95915	0.953189	0.960909	1.10033	0.902716	0.923575	0.906753	0.949731
		4.608	1.00291	0.752181	0.909	0.9939	1.04372	0.650841	0.983384	1.79555	0.751712	1.12914	1.01993	1.1828	0.875447	1.00534	0.974486	0.752181	0.849999	0.892383	0.944346	0.865535	1.01375	0.896291	0.828258	0.904787	1.04056	0.98405		0.882419	0.896059	1.22397	0.984595	1.16955	0.913898	1.08503	0.917007	0.853442	1.35492	0.943767	1.08586	0.961831	0.94754	0.951869	1.09784	0.904478	0.923618	0.903996	0.941806
		4.68	0.996906	0.74799	0.897	1.0046	1.04058	0.651613	0.980327	1.81848	0.751867	1.1255	1.01011	1.18881	0.87301	0.991729	0.975407	0.74799	0.854682	0.889452	0.936864	0.861389	1.01939	0.894747	0.822282	0.895309	1.03754	0.983028		0.873834	0.891766	1.21839	0.988915	1.175	0.912085	1.07031	0.902915	0.851526	1.34072	0.938911	1.07982	0.958891	0.946885	0.945185	1.09253	0.899581	0.921614	0.898959	0.940774
		4.752	1.00058	0.746741	0.894	0.998913	1.04119	0.646572	0.974707	1.80169	0.747382	1.12709	0.998846	1.17235	0.860781	0.975517	0.971329	0.746741	0.839347	0.877073	0.93485	0.867398	1.02715	0.893726	0.820473	0.889757	1.0335	0.97839		0.873784	0.894163	1.21105	0.989388	1.18331	0.914683	1.06728	0.903179	0.850341	1.32689	0.945249	1.0801	0.959234	0.946264	0.943202	1.09078	0.892153	0.923219	0.90698	0.942154
		4.824	0.999703	0.739448	0.886	1.00421	1.03791	0.649378	0.975721	1.77717	0.743021	1.11762	0.983574	1.16547	0.850555	0.961642	0.961689	0.739448	0.834516	0.870887	0.91875	0.865155	1.03328	0.891045	0.815457	0.891444	1.02622	0.979689		0.878087	0.896999	1.20327	0.990561	1.18466	0.909295	1.06488	0.897923	0.839071	1.31977	0.952073	1.07979	0.951307	0.946055	0.943853	1.09287	0.889726	0.929927	0.903524	0.934595
		4.896	0.979584	0.738374	0.877	1.00675	1.03014	0.653609	0.966951	1.77742	0.740294	1.10791	0.970325	1.16944	0.845811	0.956453	0.953258	0.738374	0.834963	0.864026	0.911664	0.858486	1.03189	0.881417	0.804786	0.887667	1.02171	0.98349		0.884917	0.897909	1.20208	0.98985	1.1786	0.902205	1.07108	0.894386	0.828712	1.31466	0.962963	1.07141	0.945804	0.943339	0.939352	1.09353	0.889393	0.937918	0.907696	0.922909
		4.968	0.970037	0.744941	0.873	0.996054	1.03143	0.653339	0.954739	1.76123	0.73396	1.10275	0.957967	1.15231	0.845851	0.94547	0.947419	0.744941	0.835335	0.860431	0.916104	0.857692	1.03003	0.881182	0.806962	0.890083	1.01769	0.991332		0.900223	0.904982	1.20031	0.989552	1.18232	0.887991	1.06925	0.905135	0.826872	1.31796	0.972787	1.06348	0.947739	0.949419	0.932137	1.09757	0.887488	0.943292	0.908834	0.919181
		5.04	0.954604	0.743378	0.863	1.00639	1.02908	0.655064	0.964655	1.75669	0.727459	1.09827	0.950498	1.16364	0.849586	0.951286	0.943051	0.743378	0.843712	0.864138	0.917484	0.847001	1.02221	0.880657	0.804585	0.889704	1.01575	1.00004		0.896499	0.905693	1.19648	0.989763	1.18205	0.883813	1.06175	0.909378	0.822177	1.31472	0.979738	1.0476	0.942637	0.939833	0.923309	1.10043	0.884431	0.953649	0.903269	0.910714
		5.112	0.944178	0.743856	0.862	0.997704	1.02347	0.653244	0.969028	1.73437	0.728455	1.0937	0.9452	1.15764	0.848078	0.947072	0.937894	0.743856	0.851078	0.865303	0.913484	0.834726	1.01906	0.880895	0.806941	0.892805	1.01438	1.00102		0.906584	0.916168	1.18893	0.992522	1.1787	0.887931	1.05669	0.918436	0.826664	1.31288	0.982848	1.0458	0.938973	0.938725	0.921561	1.09608	0.883796	0.96308	0.908814	0.911461
		5.184	0.943359	0.738743	0.854	1.00354	1.01908	0.654095	0.984555	1.76124	0.727566	1.086	0.945211	1.15692	0.840403	0.936374	0.931568	0.738743	0.860289	0.868912	0.906691	0.833557	1.01852	0.885707	0.80062	0.89103	1.015	0.994972		0.899494	0.918054	1.18573	1.0054	1.16561	0.888624	1.04502	0.909847	0.825526	1.30096	0.97825	1.03709	0.93085	0.931703	0.925587	1.08788	0.884977	0.968482	0.907664	0.900339
		5.256	0.951588	0.73551	0.848	1.00329	1.01352	0.65371	0.993104	1.76476	0.726957	1.08176	0.940692	1.15781	0.831025	0.925179	0.927887	0.73551	0.864392	0.866769	0.892356	0.835539	1.01126	0.887035	0.796971	0.888866	1.01707	0.992609		0.894606	0.910983	1.18176	1.01545	1.159	0.898014	1.04216	0.907252	0.818864	1.29102	0.961952	1.04494	0.917233	0.931152	0.925729	1.08925	0.886694	0.965519	0.906755	0.894602
		5.328	0.956596	0.737148	0.84	1.00102	1.01904	0.655945	1.00732	1.75474	0.724377	1.07336	0.938644	1.15894	0.826043	0.91043	0.923959	0.737148	0.86188	0.866588	0.879499	0.834512	1.0052	0.884703	0.794912	0.88251	1.01858	0.987826		0.887483	0.907387	1.17621	1.02172	1.15416	0.900322	1.03551	0.900855	0.816077	1.28595	0.956942	1.03631	0.907779	0.928613	0.9223	1.0814	0.882672	0.976822	0.899484	0.894743
		5.4	0.957886	0.731845	0.828	1.00297	1.02015	0.651974	1.02255	1.74687	0.724059	1.06837	0.934424	1.16542	0.81298	0.914529	0.920234	0.731845	0.864845	0.869791	0.875835	0.831118	1.0005	0.885915	0.782627	0.879919	1.02223	0.994211		0.880805	0.907738	1.16362	1.03061	1.15574	0.907319	1.03343	0.906321	0.814432	1.2949	0.942281	1.03229	0.908082	0.927691	0.918472	1.0762	0.876779	0.980762	0.899624	0.894653
		5.472	0.973361	0.729539	0.826	0.99357	1.01912	0.657764	1.01513	1.75644	0.725934	1.06488	0.930051	1.15172	0.808056	0.921636	0.913253	0.729539	0.859365	0.872634	0.872671	0.843123	0.996741	0.887254	0.774056	0.87687	1.02721	0.991434		0.871666	0.896934	1.15085	1.02769	1.15602	0.905744	1.03644	0.906216	0.81795	1.2901	0.921711	1.02658	0.907297	0.933789	0.920118	1.07388	0.870727	0.986083	0.893834	0.89702
		5.544	0.97632	0.719792	0.815	0.998822	1.01991	0.656703	1.01669	1.74181	0.721992	1.05785	0.923448	1.16911	0.806988	0.930216	0.909577	0.719792	0.860927	0.876282	0.885899	0.849389	0.993943	0.886451	0.77114	0.870243	1.02706	1.00166		0.860326	0.897534	1.13724	1.02246	1.16043	0.903481	1.02419	0.900048	0.809929	1.29057	0.902901	1.02065	0.911274	0.938771	0.927174	1.06091	0.869667	0.982579	0.899375	0.89088
		5.616	0.986769	0.716519	0.815	0.993968	1.0163	0.660064	1.00314	1.72449	0.725394	1.05902	0.921202	1.16617	0.80483	0.931789	0.909691	0.716519	0.857544	0.87458	0.893285	0.863771	0.983871	0.891513	0.77183	0.874481	1.02498	0.992908		0.85445	0.891428	1.12638	1.01973	1.16016	0.90497	1.02572	0.902516	0.810814	1.28194	0.893163	1.03139	0.911181	0.936786	0.915714	1.04907	0.86976	0.9835	0.914677	0.894406
		5.688	0.974095	0.708062	0.807	0.99911	1.01276	0.658298	0.996173	1.70925	0.72157	1.05708	0.917094	1.17432	0.796318	0.930114	0.904803	0.708062	0.858077	0.867827	0.894979	0.861148	0.977137	0.896899	0.771197	0.872549	1.02124	1.00181		0.854436	0.890505	1.11916	1.01764	1.15794	0.904241	1.02306	0.891102	0.810957	1.28396	0.881623	1.02782	0.904181	0.938857	0.912473	1.03551	0.864708	0.975353	0.920584	0.889253
		5.76	0.956459	0.705725	0.802	1.00183	1.01071	0.655852	0.978605	1.73755	0.718472	1.04957	0.911985	1.18493	0.796352	0.930666	0.897529	0.705725	0.857934	0.861832	0.894111	0.85518	0.971495	0.891408	0.770604	0.866689	1.01642	0.995815		0.837554	0.883656	1.11272	1.01905	1.14939	0.898207	1.02469	0.882548	0.815174	1.27636	0.869753	1.02145	0.905375	0.933411	0.894003	1.02339	0.863716	0.976058	0.921821	0.890401
		5.832	0.956213	0.70891	0.804	1.00168	1.00499	0.659302	0.95988	1.72762	0.711191	1.04873	0.910728	1.16601	0.801467	0.94024	0.89544	0.70891	0.858736	0.856041	0.882622	0.861042	0.969438	0.885016	0.773502	0.86622	1.01393	0.998757		0.826193	0.869392	1.096	1.01974	1.14239	0.893256	1.02731	0.880275	0.81068	1.24791	0.874821	1.02203	0.89833	0.922878	0.868201	1.0234	0.866154	0.967281	0.909661	0.894129
		5.904	0.945684	0.70499	0.793	1.00697	1.00258	0.653566	0.960294	1.71087	0.708172	1.04253	0.909077	1.17402	0.808513	0.9517	0.891386	0.70499	0.861477	0.858957	0.890334	0.849142	0.964889	0.879001	0.771143	0.863531	1.01106	1.00648		0.82354	0.875105	1.09408	1.01296	1.13138	0.879675	1.02464	0.875192	0.801509	1.23936	0.874571	1	0.898422	0.919048	0.86296	1.0157	0.860701	0.955459	0.894103	0.89095
		5.976	0.940439	0.70837	0.793	0.999304	0.996663	0.652548	0.95914	1.66873	0.705056	1.03865	0.902878	1.15233	0.808627	0.959072	0.895218	0.70837	0.853939	0.858131	0.886941	0.841917	0.959517	0.876465	0.772457	0.860247	1.0072	1.00315		0.837034	0.864749	1.07719	1.02004	1.12398	0.876749	1.0225	0.878551	0.798328	1.2353	0.893548	1.00206	0.893557	0.907306	0.856596	1.01451	0.858746	0.949152	0.893489	0.894501
		6.048	0.937813	0.699356	0.782	0.996665	0.995059	0.648363	0.975839	1.6785	0.704322	1.02436	0.898351	1.1516	0.816415	0.956305	0.899478	0.699356	0.841958	0.857975	0.887877	0.841289	0.955467	0.879091	0.770482	0.860187	1.0034	1.00127		0.835395	0.857139	1.06674	1.01533	1.11773	0.872053	1.0226	0.87468	0.800493	1.22702	0.901548	0.98842	0.898875	0.906459	0.876786	1.00799	0.858683	0.945496	0.884367	0.894132
		6.12	0.932139	0.694813	0.774	0.993143	0.996801	0.641099	0.989412	1.65762	0.704161	1.01192	0.892964	1.14876	0.821364	0.939552	0.903293	0.694813	0.845546	0.848386	0.890874	0.845854	0.95131	0.879459	0.763117	0.860834	1.00124	0.994947		0.840138	0.856831	1.05295	1.00523	1.12055	0.87222	1.01937	0.869448	0.803565	1.22379	0.905114	0.972714	0.895378	0.906546	0.88717	0.999938	0.86042	0.936233	0.88392	0.898379
		6.192	0.932763	0.695028	0.772	0.981615	0.98783	0.641988	0.985122	1.66436	0.708687	0.999113	0.88515	1.13285	0.8084	0.931198	0.902603	0.695028	0.847799	0.842475	0.890459	0.847208	0.947302	0.881212	0.767062	0.858909	1.00096	0.974375		0.835465	0.853745	1.03622	1.01077	1.11625	0.870331	1.01678	0.872361	0.809723	1.22001	0.903629	0.973666	0.892044	0.901268	0.883089	0.998009	0.865033	0.946016	0.888643	0.892045
		6.264	0.928212	0.685057	0.762	0.992635	0.984753	0.629758	0.980406	1.66611	0.709397	0.985425	0.886423	1.14783	0.807601	0.936794	0.90442	0.685057	0.837965	0.845115	0.887819	0.84659	0.949226	0.878225	0.756076	0.856137	0.997649	0.966177		0.83829	0.858815	1.03662	1.0017	1.11073	0.867482	1.01234	0.868126	0.804049	1.22042	0.89263	0.955584	0.892924	0.902302	0.873018	0.99638	0.868658	0.944151	0.879239	0.882864
		6.336	0.937103	0.687405	0.762	0.979035	0.980547	0.63017	0.977746	1.63748	0.716858	0.979583	0.880839	1.1319	0.798275	0.938215	0.910018	0.687405	0.839192	0.847275	0.884214	0.844416	0.949069	0.876986	0.756274	0.854864	1.0007	0.960543		0.839045	0.860605	1.02515	1.0112	1.11487	0.863631	1.00518	0.874592	0.803862	1.22953	0.888996	0.955724	0.892126	0.90484	0.846234	1	0.865015	0.955961	0.887132	0.882171
		6.408	0.940007	0.683183	0.755	0.982355	0.977914	0.625826	0.97984	1.63925	0.71924	0.969268	0.875818	1.13127	0.805363	0.936073	0.90716	0.683183	0.828172	0.848799	0.877877	0.847597	0.951774	0.874002	0.753253	0.853545	0.998408	0.964564		0.832169	0.861157	1.02174	1.00231	1.11226	0.856549	0.996879	0.884714	0.796765	1.21804	0.889983	0.938384	0.89265	0.903247	0.831831	1.00367	0.859622	0.948961	0.882142	0.889028
		6.48	0.938756	0.683161	0.751	0.975851	0.974823	0.625923	0.981475	1.6537	0.713272	0.959413	0.874029	1.12995	0.80336	0.921172	0.894011	0.683161	0.828362	0.856188	0.870151	0.854656	0.950376	0.867258	0.748282	0.848782	0.996446	0.96965		0.822792	0.857612	1.01673	0.996949	1.11041	0.852455	0.994906	0.884973	0.785828	1.20804	0.883495	0.930888	0.887315	0.897603	0.833558	0.998169	0.855961	0.954763	0.878187	0.892811
		6.552	0.931245	0.682958	0.746	0.970871	0.973793	0.625564	0.978207	1.63724	0.709127	0.948714	0.866136	1.12692	0.80155	0.907244	0.882333	0.682958	0.818455	0.846257	0.86895	0.85159	0.951104	0.869967	0.748051	0.850368	0.992404	0.974638		0.822291	0.853342	1.01268	0.993236	1.10344	0.849549	0.986555	0.901428	0.781375	1.2016	0.8768	0.922195	0.879967	0.900465	0.828118	0.99159	0.851553	0.950258	0.880024	0.887943
		6.624	0.916448	0.679138	0.738	0.971821	0.972306	0.621884	0.979794	1.62352	0.707413	0.933975	0.860293	1.14172	0.804148	0.910334	0.872272	0.679138	0.812267	0.843727	0.871009	0.842202	0.950326	0.858241	0.744435	0.843338	0.987762	0.979439		0.812619	0.852541	1.01233	0.989354	1.09694	0.842949	0.979073	0.90712	0.775938	1.19605	0.864896	0.918686	0.876506	0.906674	0.833254	0.994967	0.851496	0.934544	0.881223	0.884561
		6.696	0.918811	0.678673	0.742	0.959088	0.968376	0.625313	0.972194	1.58717	0.702552	0.92252	0.854821	1.11104	0.813447	0.918255	0.868052	0.678673	0.82742	0.836867	0.868114	0.83863	0.944092	0.85478	0.752079	0.840345	0.985615	0.972806		0.817433	0.852625	1	0.981285	1.09702	0.845038	0.967282	0.904811	0.778809	1.18895	0.865706	0.919653	0.859501	0.900926	0.837586	0.999565	0.848815	0.929534	0.885883	0.8838
		6.768	0.910871	0.666922	0.731	0.96556	0.970005	0.612955	0.969848	1.59117	0.696661	0.917514	0.853468	1.1134	0.802492	0.932359	0.871048	0.666922	0.828162	0.82428	0.868686	0.834424	0.938076	0.847862	0.746424	0.835319	0.986574	0.973788		0.811233	0.840573	0.996915	0.967125	1.09377	0.835392	0.961851	0.906941	0.771153	1.18599	0.870644	0.905869	0.851338	0.903135	0.845594	1.00852	0.848202	0.917236	0.888157	0.884919
		6.84	0.910282	0.664926	0.729	0.962137	0.966199	0.614452	0.968809	1.58149	0.695779	0.912597	0.854735	1.10835	0.798474	0.94905	0.871487	0.664926	0.835309	0.822989	0.864635	0.841252	0.934124	0.838375	0.746826	0.831424	0.98118	0.966642		0.806313	0.837487	0.993948	0.957506	1.09172	0.837622	0.957328	0.901368	0.765125	1.19189	0.886487	0.905471	0.843306	0.896129	0.842428	1.01272	0.839965	0.90866	0.895789	0.884741
		6.912	0.904882	0.659317	0.726	0.967889	0.965149	0.610619	0.957303	1.57382	0.696851	0.904786	0.847982	1.10319	0.793874	0.945598	0.876849	0.659317	0.829388	0.817558	0.856096	0.847626	0.937001	0.829352	0.742125	0.828704	0.975886	0.970521		0.807387	0.828577	0.989915	0.952772	1.08469	0.828819	0.956364	0.894271	0.759317	1.18563	0.883047	0.898359	0.837514	0.89422	0.843708	1.01402	0.836686	0.90148	0.894004	0.882008
		6.984	0.90646	0.651093	0.721	0.973649	0.962803	0.598596	0.945408	1.55498	0.697591	0.895056	0.847692	1.10072	0.789345	0.933998	0.881089	0.651093	0.830707	0.806223	0.857141	0.852232	0.938781	0.816486	0.74594	0.82711	0.969406	0.962536		0.80776	0.82521	0.987252	0.93836	1.07477	0.826633	0.952546	0.883549	0.751262	1.17862	0.866624	0.88766	0.837953	0.886546	0.840908	1.01447	0.837651	0.896258	0.899773	0.880423
		7.056	0.903537	0.653155	0.725	0.963032	0.958119	0.595264	0.940193	1.51034	0.692637	0.885037	0.843773	1.08117	0.79124	0.933852	0.886001	0.653155	0.835062	0.804079	0.849476	0.862475	0.934603	0.816393	0.751477	0.829393	0.964275	0.953397		0.817297	0.829199	0.982473	0.934701	1.07128	0.838638	0.950359	0.885222	0.75034	1.16833	0.860869	0.8838	0.83428	0.880697	0.82544	1.01459	0.836732	0.897503	0.91822	0.8804
		7.128	0.886046	0.647588	0.718	0.968993	0.95845	0.58563	0.937765	1.49239	0.691043	0.871958	0.839035	1.08232	0.77872	0.939755	0.885502	0.647588	0.82653	0.797372	0.842389	0.861111	0.932489	0.808302	0.754698	0.828973	0.959867	0.951076		0.806709	0.8217	0.982112	0.936971	1.06592	0.832114	0.949166	0.877021	0.744474	1.15826	0.850515	0.875741	0.833634	0.881587	0.829815	1.01521	0.835903	0.889563	0.928785	0.876148
		7.2	0.865503	0.642397	0.715	0.95671	0.956634	0.58611	0.944171	1.48188	0.689023	0.863772	0.832464	1.06646	0.776461	0.937446	0.885749	0.642397	0.821455	0.787134	0.84811	0.864727	0.931422	0.811426	0.752547	0.82843	0.959578	0.949826		0.800346	0.819139	0.979258	0.939064	1.05601	0.834158	0.945673	0.875475	0.746683	1.15247	0.869799	0.872564	0.833658	0.880327	0.827328	1.01566	0.83267	0.880276	0.941799	0.870493
		7.272	0.857772	0.639954	0.706	0.960459	0.949799	0.584062	0.953423	1.46458	0.681287	0.854555	0.832728	1.06221	0.773921	0.924748	0.884846	0.639954	0.81644	0.781911	0.843488	0.86484	0.928003	0.810591	0.75894	0.826634	0.957653	0.944943		0.808471	0.808274	0.971864	0.94079	1.04717	0.828069	0.942917	0.881554	0.744853	1.1509	0.874714	0.872076	0.828557	0.885926	0.840764	1.0138	0.827923	0.881174	0.94038	0.864039
		7.344	0.853185	0.639126	0.698	0.951507	0.944044	0.586275	0.967747	1.44942	0.680629	0.843509	0.828291	1.05434	0.773721	0.913112	0.881144	0.639126	0.816452	0.775625	0.848392	0.868504	0.926106	0.811991	0.759785	0.82223	0.953033	0.946344		0.810297	0.805504	0.970565	0.941189	1.04006	0.83033	0.937393	0.881464	0.75108	1.14216	0.877988	0.868125	0.823273	0.892791	0.846827	1.01778	0.828842	0.87906	0.933081	0.860505
		7.416	0.850358	0.636268	0.691	0.94103	0.940682	0.582072	0.978887	1.42311	0.675199	0.837175	0.82357	1.04449	0.777704	0.902642	0.879051	0.636268	0.818253	0.771395	0.851831	0.870681	0.92266	0.817433	0.764879	0.820045	0.950173	0.942557		0.811091	0.791858	0.965622	0.945152	1.03105	0.823942	0.936231	0.89384	0.748502	1.12913	0.866305	0.866491	0.816991	0.894924	0.841092	1.01673	0.822287	0.877626	0.922693	0.860008
		7.488	0.855467	0.638048	0.68	0.943939	0.943618	0.57476	0.966132	1.42349	0.678923	0.828467	0.813087	1.04703	0.774331	0.895637	0.874665	0.638048	0.821365	0.776799	0.851333	0.868205	0.920283	0.820421	0.764651	0.816623	0.942978	0.927948		0.806353	0.791018	0.963618	0.947077	1.02646	0.809734	0.93649	0.893291	0.740988	1.11161	0.855293	0.872047	0.810098	0.906233	0.836246	1.01697	0.820628	0.874587	0.912695	0.859641
		7.56	0.846667	0.637705	0.677	0.928809	0.940496	0.574574	0.965845	1.40242	0.675308	0.822744	0.807985	1.03586	0.773795	0.891079	0.869274	0.637705	0.83218	0.784317	0.840272	0.861483	0.921178	0.82513	0.754291	0.81653	0.936357	0.91279		0.807662	0.78889	0.959082	0.947467	1.02371	0.814072	0.935328	0.901999	0.734543	1.10398	0.845231	0.88015	0.805527	0.898475	0.828016	1.01418	0.814331	0.885717	0.9161	0.864304
		7.632	0.861441	0.64183	0.672	0.933584	0.937925	0.577374	0.961302	1.39186	0.678705	0.814304	0.804277	1.03504	0.769289	0.896037	0.862161	0.64183	0.824433	0.794439	0.838614	0.865754	0.918574	0.827009	0.745905	0.813769	0.928805	0.90833		0.80782	0.784144	0.953155	0.952699	1.01866	0.816268	0.932599	0.902413	0.723265	1.09146	0.829825	0.88602	0.798197	0.8964	0.837265	1.01413	0.814113	0.890991	0.913581	0.866675
		7.704	0.855469	0.63853	0.672	0.925096	0.935529	0.586383	0.969677	1.39125	0.679846	0.803322	0.805193	1.02959	0.762411	0.902863	0.862634	0.63853	0.824998	0.805065	0.843912	0.861521	0.920095	0.829876	0.731655	0.816876	0.925551	0.905658		0.805984	0.785813	0.947313	0.96037	1.00915	0.829412	0.930006	0.900423	0.720691	1.08481	0.825525	0.879869	0.799187	0.890338	0.841378	1.01804	0.810089	0.89329	0.90975	0.864992
		7.776	0.861595	0.636492	0.671	0.922867	0.934501	0.586505	0.966952	1.36995	0.678796	0.798371	0.806115	1.02913	0.76129	0.909253	0.8583	0.636492	0.821552	0.79849	0.850012	0.86333	0.914974	0.831451	0.732433	0.819775	0.920678	0.906274		0.814267	0.778888	0.940501	0.958333	1.00004	0.834036	0.926762	0.907708	0.722351	1.07452	0.827542	0.875072	0.798568	0.887152	0.835287	1.0161	0.805668	0.897145	0.914357	0.865232
		7.848	0.85948	0.629045	0.665	0.924446	0.934046	0.585486	0.960681	1.35742	0.677353	0.79448	0.796443	1.03533	0.761658	0.9046	0.854678	0.629045	0.814696	0.786966	0.845782	0.857726	0.912702	0.834582	0.746943	0.812325	0.915506	0.911618		0.817389	0.776526	0.935928	0.952594	0.992249	0.839415	0.912686	0.905499	0.718191	1.06929	0.834453	0.87227	0.787895	0.886188	0.835542	1.01755	0.808272	0.89307	0.910372	0.864262
		7.92	0.835044	0.624055	0.664	0.918106	0.927594	0.581274	0.970806	1.31388	0.679889	0.786303	0.787182	1.01932	0.756675	0.891459	0.844327	0.624055	0.812903	0.78711	0.844694	0.843822	0.908593	0.831719	0.744112	0.804887	0.908429	0.923455		0.817495	0.777211	0.935005	0.950107	0.982488	0.830264	0.901413	0.900049	0.724341	1.06654	0.83792	0.864949	0.788087	0.893016	0.829343	1.02175	0.805378	0.889959	0.904414	0.86485
		7.992	0.830229	0.61786	0.659	0.917249	0.924627	0.579532	0.970774	1.31707	0.676207	0.783575	0.77917	1.02168	0.752824	0.888175	0.841143	0.61786	0.810401	0.788236	0.842892	0.854556	0.906539	0.835311	0.738289	0.799375	0.902907	0.936972		0.832184	0.779004	0.9361	0.951396	0.98442	0.823413	0.893718	0.898256	0.725972	1.06339	0.837035	0.866631	0.788576	0.885623	0.837395	1.02176	0.801899	0.890476	0.902824	0.864165
		8.064	0.832591	0.615034	0.655	0.911247	0.922936	0.576063	0.971307	1.30166	0.668073	0.781805	0.78093	1.01311	0.747255	0.889352	0.843744	0.615034	0.807285	0.780962	0.835849	0.847831	0.902611	0.840978	0.728257	0.80289	0.893783	0.929687		0.853035	0.779855	0.931994	0.956534	0.978084	0.816939	0.887506	0.897234	0.729004	1.06166	0.843342	0.857577	0.783283	0.884405	0.825613	1.02468	0.797333	0.886824	0.900367	0.860414
		8.136	0.845425	0.608503	0.65	0.911902	0.921107	0.575812	0.97148	1.29057	0.662043	0.780185	0.782699	1.0157	0.74401	0.900585	0.84439	0.608503	0.8004	0.779898	0.842645	0.834489	0.897558	0.848733	0.732486	0.806388	0.885033	0.934015		0.869035	0.781627	0.933497	0.953498	0.982283	0.815483	0.884863	0.899438	0.72534	1.05235	0.845523	0.864639	0.783241	0.878489	0.826552	1.02116	0.802402	0.876939	0.903822	0.854692
		8.208	0.855739	0.610025	0.649	0.913178	0.91986	0.578732	0.972023	1.29959	0.65609	0.775176	0.786761	1.02159	0.745589	0.902386	0.842465	0.610025	0.798826	0.779069	0.847261	0.832707	0.898119	0.847178	0.728649	0.811127	0.876756	0.932045		0.874385	0.78916	0.929827	0.953376	0.9861	0.818927	0.883176	0.901716	0.721553	1.04317	0.833517	0.869534	0.781288	0.869739	0.825164	1.0194	0.800303	0.875752	0.904002	0.849762
		8.28	0.863838	0.615813	0.646	0.904558	0.920568	0.577855	0.967187	1.27719	0.656904	0.766543	0.78863	1.01499	0.7417	0.891274	0.84393	0.615813	0.792013	0.774932	0.845435	0.822787	0.900779	0.841358	0.722923	0.810324	0.869414	0.940541		0.886569	0.783988	0.927004	0.949174	0.987385	0.81772	0.880849	0.90319	0.724423	1.03152	0.825678	0.875678	0.778867	0.867005	0.824082	1.01999	0.797785	0.8724	0.900488	0.845016
		8.352	0.869025	0.618875	0.642	0.907906	0.920935	0.582718	0.962408	1.25515	0.659101	0.763044	0.793842	1.01568	0.734599	0.886143	0.837073	0.618875	0.795468	0.769738	0.849457	0.818195	0.90261	0.840445	0.729552	0.807958	0.863431	0.938833		0.892953	0.783443	0.928858	0.945191	0.994433	0.818004	0.87548	0.90522	0.721534	1.01963	0.825978	0.878511	0.776301	0.861439	0.825302	1.01436	0.798556	0.856999	0.887998	0.83501
		8.424	0.877523	0.615767	0.639	0.89964	0.922143	0.579652	0.963419	1.23773	0.659365	0.757504	0.798597	1.00555	0.729483	0.866297	0.835002	0.615767	0.796054	0.77051	0.850425	0.818151	0.902126	0.84877	0.732995	0.809523	0.859495	0.934033		0.909112	0.778859	0.918836	0.946537	0.993106	0.801711	0.866373	0.910795	0.728182	1.01524	0.825881	0.878136	0.769261	0.863159	0.817486	1.01436	0.800617	0.855028	0.885747	0.830764
		8.496	0.880754	0.615686	0.633	0.897697	0.921143	0.58968	0.96283	1.21536	0.658598	0.75573	0.791377	1.00943	0.725858	0.860944	0.825217	0.615686	0.79851	0.763377	0.849618	0.82597	0.912905	0.8556	0.738606	0.808868	0.853341	0.926014		0.91034	0.765407	0.90803	0.949667	0.998518	0.793693	0.856434	0.91415	0.726107	1.00431	0.807063	0.872391	0.765502	0.860222	0.820573	1.00849	0.803805	0.856063	0.878537	0.828875
		8.568	0.889247	0.615703	0.63	0.897962	0.918965	0.590843	0.957131	1.21644	0.653842	0.746894	0.790521	1.0109	0.73289	0.861524	0.822153	0.615703	0.796751	0.760441	0.853571	0.847783	0.912858	0.855975	0.748206	0.803544	0.845776	0.921199		0.916245	0.759028	0.901518	0.953416	0.996974	0.790659	0.854003	0.91155	0.728807	0.999649	0.790986	0.872672	0.766049	0.853781	0.816896	1.01098	0.803827	0.851438	0.872045	0.829382
		8.64	0.891432	0.616927	0.626	0.897512	0.918747	0.592823	0.967138	1.19848	0.648383	0.739462	0.784459	1.00738	0.731901	0.86167	0.81731	0.616927	0.795298	0.759078	0.853433	0.862793	0.914057	0.853787	0.751149	0.797693	0.834666	0.919682		0.920799	0.752026	0.898585	0.958916	0.991176	0.793529	0.852514	0.905979	0.727049	1	0.775283	0.875118	0.772449	0.852607	0.818269	1.01467	0.802368	0.849866	0.869291	0.826093
		8.712	0.897788	0.619572	0.625	0.901477	0.912782	0.594439	0.970201	1.19221	0.647895	0.734951	0.783643	1.00545	0.737759	0.854294	0.812261	0.619572	0.801476	0.755083	0.860381	0.860155	0.910548	0.847361	0.745515	0.794592	0.827477	0.919012		0.918413	0.743224	0.893867	0.959811	0.992643	0.799317	0.856454	0.90783	0.729177	1.00051	0.766397	0.870764	0.778902	0.849766	0.820582	1.0155	0.808359	0.844045	0.86343	0.821318
		8.784	0.902006	0.621768	0.625	0.892337	0.907026	0.590086	0.964562	1.17456	0.649263	0.727064	0.778896	0.995319	0.735257	0.855031	0.820044	0.621768	0.800815	0.747969	0.861914	0.835697	0.903318	0.850802	0.746928	0.792927	0.824653	0.91853		0.929263	0.746642	0.886303	0.950851	0.98275	0.812441	0.862151	0.912419	0.726893	0.999967	0.764843	0.872254	0.782139	0.851945	0.812031	1.01655	0.801938	0.841312	0.86298	0.819114
		8.856	0.899786	0.625954	0.621	0.887383	0.901848	0.591558	0.959278	1.17769	0.645408	0.723072	0.768768	0.992821	0.737628	0.859672	0.816359	0.625954	0.807617	0.743648	0.855575	0.827368	0.902106	0.848248	0.742645	0.784595	0.822233	0.902683		0.930831	0.737672	0.878138	0.944661	0.982827	0.809466	0.859744	0.908378	0.724818	0.99287	0.768298	0.854279	0.776901	0.85245	0.809957	1.0171	0.809283	0.835833	0.851094	0.811916
		8.928	0.898897	0.622253	0.617	0.878527	0.897998	0.584392	0.956937	1.16519	0.642581	0.716968	0.770055	0.992197	0.739398	0.858962	0.815009	0.622253	0.80576	0.743169	0.852418	0.840584	0.903463	0.852743	0.73842	0.787674	0.820251	0.89811		0.938751	0.735056	0.869889	0.93546	0.983113	0.808671	0.863944	0.913095	0.720023	0.989043	0.766578	0.847229	0.770873	0.852882	0.804126	1.01302	0.803933	0.833486	0.847385	0.807194
		9	0.878231	0.618743	0.61	0.876603	0.895775	0.57845	0.945805	1.17356	0.638996	0.710608	0.763763	1.00323	0.744713	0.854604	0.811476	0.618743	0.801301	0.742968	0.842164	0.840274	0.895886	0.840883	0.74794	0.784239	0.819253	0.883407		0.941799	0.732478	0.864944	0.932855	0.9844	0.796737	0.863173	0.903284	0.71644	0.991128	0.754446	0.842649	0.763424	0.851713	0.795768	1.01088	0.799881	0.832527	0.841345	0.804289
		9.072	0.857356	0.615428	0.608	0.873134	0.893404	0.568951	0.94197	1.16464	0.641141	0.706933	0.761125	0.997512	0.74752	0.850152	0.812688	0.615428	0.800784	0.736855	0.837679	0.830141	0.893336	0.838646	0.750964	0.785622	0.825599	0.872645		0.952432	0.731064	0.860598	0.931048	0.982394	0.79243	0.865236	0.906909	0.718251	0.987507	0.747958	0.84304	0.763187	0.848479	0.792049	1.01269	0.799053	0.831226	0.8507	0.805734
		9.144	0.860226	0.614187	0.608	0.868643	0.889343	0.562294	0.951972	1.17765	0.640977	0.698748	0.757189	0.99038	0.748787	0.841992	0.806042	0.614187	0.790571	0.727609	0.832048	0.821711	0.88738	0.829936	0.746678	0.787846	0.825341	0.874602		0.959807	0.727628	0.860099	0.924106	0.979507	0.791921	0.855656	0.909863	0.722875	0.981239	0.735704	0.845914	0.76103	0.848826	0.781587	1.0155	0.806009	0.831561	0.851846	0.810725
		9.216	0.872086	0.611333	0.609	0.870334	0.886434	0.564912	0.943595	1.17374	0.636769	0.697505	0.756545	0.989824	0.739669	0.852099	0.804814	0.611333	0.796521	0.724037	0.831724	0.812374	0.884468	0.81531	0.753355	0.783305	0.819282	0.874979		0.969511	0.721168	0.856042	0.924979	0.97523	0.785131	0.84879	0.889001	0.717744	0.977484	0.742052	0.844142	0.756353	0.847714	0.782669	1.01285	0.807546	0.818598	0.839167	0.816224
		9.288	0.879257	0.613183	0.607	0.865941	0.888114	0.55922	0.941419	1.16608	0.62538	0.691337	0.762212	0.990196	0.738825	0.847101	0.809148	0.613183	0.797565	0.723338	0.828807	0.800427	0.891402	0.810482	0.747754	0.784027	0.809488	0.884899		0.971551	0.714224	0.848523	0.928601	0.973729	0.78482	0.838558	0.884539	0.716356	0.970808	0.744724	0.842855	0.750563	0.838987	0.775503	1.00861	0.810887	0.814029	0.832338	0.815202
		9.36	0.879824	0.61437	0.605	0.86366	0.88702	0.556702	0.92578	1.16845	0.611617	0.684793	0.758183	0.980773	0.738155	0.838883	0.814412	0.61437	0.806227	0.730054	0.826263	0.795403	0.888743	0.80294	0.743324	0.779323	0.805623	0.886924		0.972028	0.711304	0.838776	0.938603	0.965968	0.780631	0.837419	0.870245	0.711402	0.964367	0.745565	0.840516	0.743146	0.835506	0.772149	0.999213	0.804184	0.807254	0.835521	0.810525
		9.432	0.888729	0.610348	0.602	0.863455	0.886088	0.557875	0.909822	1.15764	0.604102	0.680704	0.757813	0.977401	0.732555	0.828174	0.808691	0.610348	0.807744	0.736559	0.824323	0.80102	0.886379	0.796025	0.741279	0.780254	0.799037	0.885073		0.980342	0.711701	0.829098	0.940209	0.958992	0.766411	0.839459	0.873859	0.717017	0.960296	0.738419	0.843521	0.743306	0.826109	0.770966	0.997834	0.803224	0.803335	0.847096	0.809023
		9.504	0.900786	0.608	0.598	0.860653	0.883879	0.560281	0.896128	1.15242	0.600825	0.672334	0.755641	0.971691	0.723831	0.823495	0.804106	0.608	0.797083	0.729087	0.823078	0.809856	0.888953	0.791541	0.735151	0.78007	0.791864	0.877486		0.985716	0.714264	0.820792	0.939163	0.950687	0.75763	0.838223	0.871159	0.715757	0.957952	0.726035	0.852009	0.748542	0.819734	0.777997	1.00017	0.800335	0.796912	0.858274	0.805123
		9.576	0.899141	0.608294	0.594	0.858606	0.881277	0.568955	0.897093	1.1457	0.598731	0.66931	0.750665	0.96445	0.71816	0.834057	0.793606	0.608294	0.800847	0.730609	0.832205	0.814197	0.891565	0.789288	0.745342	0.775876	0.789665	0.875701		1.00357	0.709532	0.817224	0.939678	0.949115	0.750129	0.83638	0.869186	0.711971	0.95277	0.712247	0.84814	0.750864	0.811534	0.775693	0.993703	0.795913	0.788368	0.860716	0.810952
		9.648	0.902151	0.602775	0.591	0.849454	0.878884	0.565471	0.902303	1.11857	0.600372	0.662163	0.756545	0.962105	0.72191	0.841503	0.794655	0.602775	0.795418	0.724844	0.848232	0.814702	0.889753	0.806433	0.746142	0.772636	0.794374	0.875998		0.99998	0.719326	0.812902	0.943172	0.946935	0.762937	0.833389	0.86621	0.71107	0.950629	0.706586	0.848672	0.75399	0.805203	0.764337	0.98548	0.792417	0.785713	0.876218	0.815257
		9.72	0.891216	0.604825	0.587	0.858302	0.873169	0.567049	0.912617	1.11018	0.59776	0.657804	0.748838	0.966683	0.718943	0.850549	0.792391	0.604825	0.797242	0.721381	0.851501	0.815178	0.88016	0.809451	0.742951	0.775042	0.794056	0.873426		1.00157	0.717466	0.808494	0.940453	0.947529	0.751052	0.835206	0.861585	0.696628	0.949166	0.703111	0.831177	0.741429	0.806128	0.768414	0.980807	0.783802	0.790886	0.885933	0.819538
		9.792	0.896712	0.596983	0.585	0.855723	0.868052	0.559903	0.918661	1.09099	0.594287	0.651733	0.750103	0.960065	0.716185	0.832773	0.791973	0.596983	0.798402	0.722399	0.864242	0.816867	0.881807	0.813529	0.749673	0.781067	0.790309	0.868234		0.988043	0.724127	0.797388	0.937145	0.938643	0.763659	0.834248	0.858049	0.69592	0.946359	0.711547	0.82014	0.741471	0.800941	0.751915	0.982364	0.7805	0.795097	0.892593	0.817475
		9.864	0.885023	0.593327	0.582	0.856209	0.86537	0.557276	0.904763	1.08467	0.5828	0.647387	0.747112	0.962948	0.716939	0.814315	0.797598	0.593327	0.798582	0.724348	0.855654	0.815444	0.871713	0.805745	0.755506	0.779941	0.784225	0.858721		0.99687	0.710665	0.789048	0.929851	0.933202	0.759621	0.840812	0.852721	0.687711	0.945112	0.717217	0.813112	0.738283	0.811204	0.751172	0.980653	0.780077	0.78768	0.88933	0.815425
		9.936	0.873027	0.591508	0.579	0.852745	0.859147	0.557935	0.891216	1.0625	0.583236	0.642904	0.744372	0.959883	0.715682	0.803888	0.801094	0.591508	0.798253	0.730035	0.865275	0.823307	0.870374	0.804078	0.755361	0.770641	0.781912	0.857405		1.00497	0.692302	0.785687	0.920369	0.930696	0.751241	0.843448	0.863674	0.679784	0.950923	0.718	0.804502	0.739626	0.804656	0.760099	0.978046	0.784286	0.784158	0.879417	0.815817
		10.008	0.860776	0.591978	0.581	0.844484	0.854921	0.558346	0.882554	1.02709	0.58226	0.64399	0.744936	0.949765	0.721446	0.797207	0.802987	0.591978	0.790877	0.732615	0.859603	0.822901	0.862543	0.812712	0.754507	0.765366	0.77719	0.846556		0.996175	0.680322	0.780898	0.913122	0.921589	0.755003	0.847089	0.878671	0.676519	0.944473	0.716573	0.806062	0.734038	0.803594	0.757483	0.98032	0.783633	0.77993	0.883052	0.810082
		10.08	0.855475	0.594692	0.578	0.845561	0.84901	0.562362	0.881158	1.01956	0.588145	0.638046	0.73829	0.947923	0.724357	0.807831	0.796805	0.594692	0.792969	0.729738	0.850777	0.819755	0.856045	0.79565	0.753441	0.766311	0.768961	0.848245		1.01045	0.666847	0.779928	0.903585	0.922404	0.747481	0.843018	0.881524	0.672511	0.943985	0.71645	0.799318	0.726047	0.801865	0.759384	0.982015	0.783778	0.777861	0.877873	0.800844
		10.152	0.848143	0.58589	0.576	0.838315	0.845484	0.560776	0.881973	1.0172	0.590207	0.638476	0.738932	0.942078	0.728425	0.807099	0.786193	0.58589	0.78524	0.728458	0.85325	0.817952	0.852071	0.797799	0.746232	0.763915	0.768444	0.835774		0.992636	0.669098	0.778508	0.897191	0.91826	0.750077	0.843858	0.885289	0.673679	0.934923	0.712552	0.798731	0.719071	0.798847	0.75422	0.984925	0.78284	0.78781	0.88799	0.792764
		10.224	0.851569	0.585371	0.573	0.839489	0.842256	0.562738	0.871904	1.01673	0.586462	0.634007	0.737331	0.9443	0.732707	0.810852	0.777992	0.585371	0.789066	0.731966	0.860909	0.819139	0.84813	0.792519	0.743171	0.761018	0.766447	0.825124		1.00109	0.671083	0.775457	0.892097	0.915776	0.745064	0.840548	0.86622	0.672641	0.931663	0.706744	0.796455	0.71719	0.797826	0.751028	0.979689	0.777835	0.79092	0.884047	0.790091
		10.296	0.856377	0.589034	0.572	0.833717	0.837261	0.558695	0.85517	1.01216	0.582254	0.628436	0.740736	0.944599	0.721438	0.809391	0.775374	0.589034	0.779574	0.730742	0.857306	0.814608	0.852182	0.791554	0.743917	0.756197	0.772623	0.819843		1.00495	0.681912	0.771945	0.887124	0.916637	0.746799	0.837669	0.852392	0.681075	0.930264	0.708001	0.796505	0.712902	0.802431	0.751104	0.969288	0.769685	0.78794	0.885549	0.789962
		10.368	0.873837	0.594039	0.571	0.827354	0.832369	0.553016	0.851991	1.00576	0.571936	0.625052	0.746819	0.941622	0.716083	0.806213	0.7743	0.594039	0.790257	0.721019	0.859612	0.813478	0.854336	0.800287	0.747149	0.74854	0.76819	0.812396		1.017	0.68739	0.772372	0.885008	0.912759	0.74566	0.837659	0.838502	0.686902	0.924896	0.707978	0.787673	0.710369	0.795491	0.748694	0.96786	0.765794	0.785182	0.88672	0.783681
		10.44	0.890812	0.592279	0.567	0.825192	0.827085	0.556835	0.841031	0.99769	0.564882	0.624359	0.74847	0.946814	0.711666	0.805131	0.772362	0.592279	0.795938	0.715569	0.846427	0.804019	0.856487	0.802946	0.7426	0.7514	0.760775	0.814068		1.02221	0.702867	0.768845	0.883697	0.916973	0.751082	0.834762	0.835608	0.691937	0.922016	0.698795	0.788359	0.709212	0.796101	0.756482	0.968505	0.76624	0.778299	0.876272	0.778215
		10.512	0.909957	0.584278	0.563	0.815242	0.821532	0.551267	0.83591	0.989214	0.562943	0.622152	0.74326	0.929579	0.707799	0.799065	0.773985	0.584278	0.798887	0.71783	0.847253	0.805015	0.849894	0.816284	0.745075	0.75498	0.752577	0.806588		1.01481	0.717794	0.765623	0.890584	0.917643	0.757276	0.835098	0.838917	0.70062	0.91285	0.67887	0.786636	0.714793	0.792693	0.756266	0.970313	0.764946	0.780054	0.879424	0.774328
		10.584	0.913559	0.59152	0.561	0.821098	0.819321	0.551133	0.817144	0.984448	0.561899	0.622352	0.740423	0.931424	0.708719	0.791667	0.77021	0.59152	0.794414	0.713135	0.835784	0.812259	0.846481	0.824496	0.745368	0.754591	0.750813	0.801001		1.0321	0.698958	0.752265	0.890183	0.924048	0.745964	0.838252	0.839198	0.703587	0.906732	0.669391	0.79061	0.722259	0.783362	0.760339	0.969543	0.762513	0.774432	0.874923	0.778263
		10.656	0.915174	0.582798	0.561	0.815752	0.818662	0.542421	0.817747	0.968362	0.560513	0.620578	0.734126	0.92252	0.715641	0.789386	0.772918	0.582798	0.788967	0.707704	0.834996	0.810517	0.838026	0.820278	0.750916	0.759295	0.74593	0.802902		1.03456	0.706987	0.744298	0.885497	0.916068	0.749168	0.837299	0.834541	0.706788	0.897656	0.65623	0.789622	0.728636	0.787939	0.758439	0.974864	0.763755	0.777974	0.871198	0.778823
		10.728	0.908355	0.580225	0.559	0.817382	0.817357	0.538234	0.813896	0.956063	0.55581	0.622864	0.737306	0.913549	0.721645	0.784899	0.77594	0.580225	0.780297	0.70197	0.823933	0.808265	0.832757	0.822065	0.761949	0.760097	0.739123	0.800524		1.04242	0.70542	0.735978	0.886403	0.909442	0.755307	0.840412	0.831141	0.704455	0.893132	0.651397	0.788647	0.726673	0.780359	0.752541	0.977835	0.767504	0.779967	0.873756	0.774728
		10.8	0.904298	0.576685	0.555	0.822416	0.818714	0.531919	0.801565	0.954014	0.546772	0.62211	0.737626	0.913626	0.719576	0.785222	0.773402	0.576685	0.782703	0.697773	0.813989	0.80776	0.835572	0.820757	0.763599	0.759803	0.733413	0.800433		1.05035	0.695754	0.731273	0.887248	0.90416	0.754251	0.848891	0.83622	0.701167	0.891632	0.64623	0.778487	0.719184	0.781252	0.744689	0.975264	0.768751	0.77116	0.867503	0.76491
		10.872	0.910376	0.574174	0.55	0.815611	0.813263	0.532245	0.800414	0.945316	0.542929	0.624578	0.741635	0.897505	0.710568	0.797944	0.774945	0.574174	0.762732	0.69665	0.820585	0.817458	0.844576	0.821057	0.760402	0.756796	0.727821	0.785539		1.04709	0.705768	0.719114	0.888086	0.898025	0.779918	0.854516	0.834726	0.70354	0.888909	0.645216	0.773833	0.714692	0.783186	0.735376	0.969311	0.767223	0.764717	0.877136	0.750103
		10.944	0.915119	0.571242	0.546	0.821337	0.807408	0.528176	0.803276	0.941044	0.539792	0.62198	0.732342	0.902472	0.709916	0.797566	0.755226	0.571242	0.763771	0.701323	0.813431	0.816151	0.840873	0.815623	0.768597	0.756468	0.721237	0.782042		1.04888	0.686427	0.716562	0.895338	0.893671	0.765665	0.858273	0.83431	0.691573	0.884293	0.624169	0.768224	0.706534	0.778667	0.727701	0.967914	0.766179	0.759905	0.877589	0.739462
		11.016	0.916129	0.570779	0.541	0.817473	0.802089	0.534213	0.809576	0.934991	0.537869	0.622401	0.725187	0.895153	0.707957	0.807045	0.750031	0.570779	0.763067	0.698746	0.817411	0.816879	0.838188	0.816575	0.76692	0.755346	0.723243	0.765474		1.06593	0.695371	0.711113	0.906204	0.886597	0.75999	0.855104	0.823114	0.685398	0.878533	0.612553	0.756703	0.703676	0.782049	0.720475	0.968436	0.765809	0.751897	0.893573	0.73278
		11.088	0.905619	0.575361	0.545	0.819853	0.796124	0.532172	0.814433	0.929949	0.540046	0.617866	0.717687	0.904452	0.70175	0.809953	0.747319	0.575361	0.759722	0.702324	0.811138	0.820508	0.832238	0.815519	0.766241	0.749971	0.720667	0.762393		1.07522	0.692268	0.712389	0.915965	0.878701	0.749658	0.848976	0.817736	0.681134	0.877679	0.596951	0.754901	0.701018	0.772371	0.719155	0.961024	0.764868	0.753186	0.897555	0.729598
		11.16	0.89879	0.573514	0.538	0.819272	0.789208	0.535115	0.819163	0.920186	0.540893	0.610511	0.711937	0.908252	0.703754	0.809328	0.742623	0.573514	0.764939	0.701737	0.806358	0.819714	0.827242	0.823259	0.761423	0.746105	0.71181	0.752247		1.07885	0.697421	0.708518	0.911209	0.873208	0.742192	0.849443	0.816149	0.673547	0.877047	0.591563	0.755932	0.6972	0.769248	0.720273	0.959155	0.772361	0.752795	0.898949	0.727163
		11.232	0.88676	0.568016	0.536	0.817547	0.784738	0.535749	0.824473	0.904638	0.540572	0.6041	0.712501	0.906082	0.708034	0.796639	0.743729	0.568016	0.760654	0.69528	0.808292	0.812213	0.824876	0.81396	0.765874	0.743185	0.710784	0.756844		1.08958	0.708442	0.699506	0.899049	0.865106	0.749132	0.852561	0.822626	0.671371	0.87206	0.592971	0.758317	0.69906	0.762572	0.711492	0.958344	0.780428	0.749523	0.906332	0.73031
		11.304	0.875147	0.570767	0.529	0.821367	0.7806	0.526256	0.830736	0.898416	0.536363	0.603939	0.717367	0.917152	0.711034	0.789661	0.735464	0.570767	0.757014	0.690183	0.796209	0.815255	0.819378	0.812018	0.758883	0.743828	0.703741	0.753878		1.0968	0.701056	0.691101	0.886685	0.866538	0.742285	0.855745	0.824778	0.667686	0.867604	0.594822	0.754561	0.697013	0.760412	0.711819	0.956548	0.790679	0.73655	0.913344	0.728395
		11.376	0.872273	0.570511	0.527	0.818602	0.77947	0.521866	0.834393	0.878305	0.525464	0.601648	0.720088	0.907286	0.703399	0.793969	0.733655	0.570511	0.752335	0.688982	0.797108	0.816152	0.803571	0.824114	0.756364	0.734006	0.70447	0.760097		1.07007	0.703062	0.683333	0.884305	0.867129	0.756564	0.861725	0.826984	0.671998	0.867606	0.607792	0.746861	0.692647	0.755357	0.696105	0.947575	0.783421	0.734977	0.927193	0.735578
		11.448	0.87728	0.567939	0.528	0.816797	0.775884	0.514629	0.811629	0.87193	0.516847	0.604347	0.716658	0.909198	0.699564	0.796064	0.736358	0.567939	0.737765	0.694349	0.79248	0.833646	0.79539	0.830401	0.744717	0.726032	0.70493	0.749626		1.07578	0.703535	0.682753	0.87578	0.866929	0.763121	0.857157	0.826166	0.674537	0.867638	0.608574	0.731976	0.686245	0.749499	0.694141	0.936446	0.783004	0.726301	0.938111	0.732277
		11.52	0.878691	0.571626	0.525	0.812323	0.771413	0.518164	0.799065	0.869095	0.508698	0.602141	0.715417	0.911419	0.693026	0.793468	0.734094	0.571626	0.726724	0.68769	0.797831	0.845627	0.782938	0.830488	0.730226	0.7197	0.703101	0.747816		1.05507	0.707591	0.683056	0.869711	0.868577	0.772994	0.853581	0.826441	0.669482	0.871193	0.60192	0.712961	0.679882	0.745456	0.687647	0.931597	0.77609	0.722343	0.933427	0.725607
		11.592	0.869632	0.574267	0.523	0.802238	0.766659	0.520688	0.788617	0.868062	0.503226	0.598199	0.709025	0.905003	0.688751	0.785021	0.740482	0.574267	0.713628	0.680222	0.795768	0.85711	0.782995	0.828527	0.726526	0.708282	0.706598	0.741066		1.05458	0.711222	0.684809	0.854976	0.866215	0.764635	0.85427	0.825489	0.665473	0.876643	0.600158	0.718096	0.674442	0.747056	0.68134	0.934931	0.771638	0.719728	0.931757	0.719686
		11.664	0.871126	0.568378	0.517	0.800436	0.763332	0.512509	0.777764	0.861257	0.495236	0.59045	0.700214	0.905895	0.687584	0.773949	0.737911	0.568378	0.723722	0.684134	0.783017	0.848672	0.784332	0.816288	0.730668	0.710384	0.70614	0.739133		1.05195	0.715172	0.684237	0.845298	0.862225	0.756052	0.852472	0.822226	0.655264	0.882036	0.596464	0.71974	0.672747	0.750395	0.684872	0.931207	0.769947	0.715304	0.936445	0.711863
		11.736	0.875148	0.569612	0.514	0.796644	0.759139	0.511952	0.776605	0.8488	0.489768	0.579227	0.689824	0.904159	0.681901	0.767972	0.728996	0.569612	0.723372	0.693039	0.775894	0.828395	0.781146	0.817675	0.733674	0.710613	0.709201	0.735758		1.03917	0.708649	0.684875	0.854426	0.862471	0.752791	0.857842	0.821874	0.644623	0.882684	0.599468	0.723239	0.676492	0.749381	0.685186	0.934239	0.765609	0.720774	0.935516	0.71713
		11.808	0.870218	0.559643	0.514	0.796642	0.753859	0.506267	0.756777	0.856104	0.485786	0.571724	0.68274	0.903406	0.67804	0.767995	0.725277	0.559643	0.726107	0.695411	0.761693	0.838329	0.773915	0.806385	0.744575	0.711296	0.713035	0.739982		1.02715	0.701941	0.684719	0.861881	0.860661	0.750261	0.850701	0.821393	0.644291	0.874271	0.595863	0.720678	0.679344	0.75253	0.675083	0.928847	0.770344	0.718925	0.939268	0.71518
		11.88	0.871877	0.557363	0.509	0.790244	0.749961	0.513516	0.753114	0.84684	0.490523	0.5689	0.689676	0.896417	0.675058	0.777003	0.716527	0.557363	0.732904	0.690178	0.764226	0.827028	0.779866	0.795526	0.746087	0.704958	0.717123	0.744296		1.00669	0.686789	0.685546	0.855622	0.860204	0.753961	0.853794	0.824209	0.641112	0.872461	0.59398	0.725396	0.672955	0.755552	0.673083	0.92734	0.756985	0.721471	0.933908	0.711542
		11.952	0.868889	0.557271	0.507	0.789126	0.748645	0.517501	0.756275	0.842005	0.496327	0.564298	0.692034	0.89731	0.672775	0.784602	0.71425	0.557271	0.723302	0.678501	0.75335	0.826213	0.785584	0.783446	0.745318	0.695869	0.719025	0.741866		1.01218	0.691437	0.683578	0.841404	0.852003	0.760206	0.861342	0.817125	0.639117	0.877753	0.582064	0.713065	0.667481	0.758542	0.670522	0.928099	0.752138	0.713593	0.918412	0.702734
		12.024	0.858791	0.554868	0.504	0.78522	0.748286	0.512354	0.759781	0.83406	0.500861	0.561223	0.697524	0.900852	0.667724	0.788437	0.713481	0.554868	0.731257	0.672388	0.762571	0.836391	0.788013	0.787494	0.743338	0.689102	0.719635	0.742498		1.01186	0.687046	0.684074	0.830134	0.850894	0.762795	0.870545	0.815663	0.63849	0.873412	0.577359	0.718397	0.660914	0.756161	0.6647	0.930351	0.744099	0.708894	0.917201	0.695831
		12.096	0.858341	0.55525	0.502	0.778624	0.753528	0.508298	0.749728	0.820143	0.504052	0.557023	0.69832	0.889584	0.666424	0.781392	0.716401	0.55525	0.733551	0.668711	0.769511	0.818418	0.787755	0.793887	0.731681	0.685471	0.725476	0.726465		1.00951	0.673928	0.680001	0.835486	0.850571	0.77772	0.880577	0.824933	0.644336	0.868716	0.578602	0.723302	0.66444	0.768778	0.671235	0.929766	0.74208	0.714205	0.901154	0.696678
		12.168	0.865537	0.54975	0.502	0.778354	0.755866	0.501978	0.733973	0.813712	0.498877	0.553104	0.703965	0.892867	0.660154	0.777577	0.714351	0.54975	0.728852	0.663624	0.7636	0.838306	0.783788	0.791559	0.730394	0.679082	0.716877	0.729642		1.02291	0.667429	0.67406	0.821301	0.846766	0.773812	0.87965	0.824768	0.637808	0.863072	0.581479	0.714075	0.663331	0.778784	0.674263	0.938905	0.747992	0.70784	0.925809	0.687977
		12.24	0.874168	0.556665	0.497	0.769473	0.755082	0.492642	0.717816	0.802292	0.49491	0.55733	0.702216	0.889663	0.647172	0.779086	0.715342	0.556665	0.727291	0.663345	0.766799	0.826602	0.787658	0.796862	0.730968	0.682675	0.709567	0.72984		1.01345	0.650043	0.67274	0.818924	0.83687	0.782396	0.874733	0.832545	0.637479	0.858265	0.586114	0.70082	0.659223	0.774155	0.675101	0.939558	0.747243	0.707166	0.94713	0.684876
		12.312	0.874016	0.549051	0.492	0.766002	0.747919	0.489205	0.716563	0.793719	0.4888	0.562411	0.699418	0.888436	0.643832	0.768666	0.720892	0.549051	0.725294	0.663531	0.762421	0.82646	0.792458	0.791574	0.727268	0.681559	0.69956	0.736799		1.01929	0.651884	0.666679	0.800166	0.829858	0.77803	0.871625	0.828564	0.63519	0.862989	0.58431	0.672913	0.656799	0.778096	0.673884	0.942405	0.747536	0.69681	0.970625	0.677833
		12.384	0.871257	0.545453	0.488	0.75978	0.740552	0.486423	0.717369	0.792022	0.482261	0.563521	0.697156	0.886139	0.632939	0.757234	0.726967	0.545453	0.719309	0.666286	0.757594	0.831217	0.787575	0.792705	0.715922	0.677787	0.690568	0.734317		1.00383	0.642839	0.662919	0.797787	0.82884	0.791499	0.870586	0.825023	0.632816	0.858631	0.578344	0.674098	0.659618	0.776081	0.669497	0.937901	0.74277	0.697749	0.974001	0.680119
		12.456	0.862368	0.536338	0.478	0.756917	0.731477	0.492315	0.715868	0.787887	0.480205	0.562031	0.693589	0.884985	0.628845	0.745742	0.730675	0.536338	0.713541	0.662582	0.75129	0.83266	0.783008	0.79879	0.711607	0.672262	0.683012	0.735182		1.01376	0.639779	0.6644	0.792019	0.820518	0.786604	0.870673	0.822382	0.63201	0.860374	0.573308	0.662229	0.663359	0.774926	0.66898	0.939134	0.74587	0.695226	0.965037	0.688288
		12.528	0.846999	0.52617	0.469	0.753237	0.725287	0.497959	0.706968	0.801766	0.478993	0.558942	0.685601	0.887283	0.628053	0.734122	0.720827	0.52617	0.706808	0.654861	0.751688	0.848638	0.774309	0.797196	0.702266	0.673433	0.668235	0.736133		1.02004	0.649377	0.66998	0.785739	0.810518	0.788195	0.865533	0.817531	0.628317	0.855981	0.567949	0.659651	0.66748	0.773839	0.666517	0.939317	0.746741	0.691394	0.956192	0.693118
		12.6	0.830816	0.524753	0.466	0.745155	0.72257	0.497603	0.703309	0.800315	0.480685	0.557249	0.687189	0.875553	0.624495	0.732087	0.719798	0.524753	0.708427	0.649227	0.748569	0.840187	0.768059	0.797148	0.705879	0.665346	0.667764	0.719945		1.01466	0.645987	0.673146	0.782426	0.806492	0.813376	0.862905	0.809481	0.626768	0.854591	0.568006	0.672025	0.670385	0.774842	0.663932	0.933223	0.746431	0.693951	0.936647	0.692051
		12.672	0.846354	0.528495	0.464	0.744706	0.716026	0.487162	0.681169	0.812778	0.473517	0.555502	0.6897	0.876462	0.625658	0.731395	0.7163	0.528495	0.704358	0.643936	0.747741	0.842004	0.765761	0.782936	0.711901	0.666821	0.669423	0.717218		1.01155	0.647313	0.670863	0.783928	0.802734	0.805545	0.857916	0.79956	0.625386	0.846915	0.56182	0.667274	0.672042	0.783271	0.656624	0.929935	0.743148	0.689509	0.933292	0.686307
		12.744	0.833906	0.531339	0.465	0.740101	0.714221	0.481949	0.675554	0.816105	0.471968	0.557599	0.697489	0.868051	0.61881	0.732829	0.726776	0.531339	0.707849	0.6415	0.738868	0.834064	0.757915	0.77737	0.709904	0.665966	0.67433	0.709066		1.01579	0.644288	0.668128	0.784494	0.805797	0.829192	0.85208	0.796356	0.623465	0.842476	0.552111	0.679212	0.667291	0.781215	0.641795	0.932504	0.737835	0.691923	0.946535	0.686018
		12.816	0.831084	0.535935	0.466	0.741097	0.711628	0.4786	0.670449	0.821423	0.468186	0.556063	0.708817	0.864713	0.620685	0.731067	0.71656	0.535935	0.718831	0.64308	0.738843	0.817603	0.758956	0.768087	0.711722	0.656509	0.666599	0.705681		1.02409	0.656458	0.664882	0.773266	0.794411	0.831134	0.849797	0.795356	0.617303	0.83553	0.546965	0.669179	0.657516	0.785011	0.641017	0.936343	0.736839	0.68954	0.957223	0.688303
		12.888	0.81074	0.537983	0.468	0.7344	0.714654	0.476712	0.670659	0.818288	0.468463	0.555495	0.706299	0.860028	0.620408	0.735046	0.714944	0.537983	0.717629	0.642736	0.728483	0.808856	0.760221	0.758574	0.70269	0.648815	0.663081	0.711762		1.01665	0.645858	0.66021	0.763002	0.783292	0.836785	0.846413	0.792842	0.615937	0.831988	0.54093	0.667035	0.658923	0.778076	0.629166	0.937638	0.740346	0.691602	0.966098	0.691289
		12.96	0.812897	0.534043	0.469	0.727855	0.716509	0.479049	0.669434	0.812459	0.472527	0.558625	0.699731	0.851413	0.612477	0.741086	0.712145	0.534043	0.720707	0.646472	0.723593	0.798423	0.754948	0.750251	0.680153	0.641334	0.66603	0.705684		0.986706	0.639885	0.66269	0.755626	0.775294	0.839266	0.843995	0.808914	0.615916	0.831998	0.530554	0.665769	0.657906	0.773168	0.613015	0.932042	0.734575	0.695769	0.977161	0.683284
		13.032	0.825982	0.536918	0.461	0.727835	0.714759	0.479969	0.658815	0.817284	0.473124	0.556035	0.69716	0.844379	0.61172	0.743394	0.716711	0.536918	0.709243	0.64173	0.709918	0.816368	0.757376	0.743381	0.673048	0.638875	0.674939	0.715821		1.01504	0.644469	0.660617	0.757908	0.768197	0.810993	0.838452	0.799198	0.607024	0.829591	0.51788	0.665369	0.647743	0.775221	0.611136	0.925553	0.734862	0.68799	0.969845	0.670024
		13.104	0.814148	0.533804	0.458	0.717246	0.713054	0.481755	0.657416	0.831504	0.475764	0.557093	0.686236	0.831657	0.602838	0.7391	0.711614	0.533804	0.715997	0.639434	0.718912	0.802725	0.756342	0.742202	0.66613	0.637897	0.667315	0.711527		1.01777	0.628383	0.658519	0.757965	0.76475	0.802979	0.839828	0.807382	0.609498	0.830894	0.512662	0.668514	0.64614	0.767113	0.608353	0.913514	0.731116	0.690326	0.953512	0.66028
		13.176	0.806911	0.533078	0.456	0.71259	0.713299	0.485401	0.66542	0.846027	0.473542	0.554202	0.678679	0.832524	0.595462	0.736042	0.715209	0.533078	0.708369	0.640731	0.726418	0.814333	0.762043	0.732201	0.676788	0.629681	0.655377	0.708084		1.03368	0.62707	0.651125	0.756088	0.761273	0.78419	0.840141	0.806539	0.609475	0.826478	0.51158	0.667181	0.64159	0.757909	0.613396	0.910794	0.725246	0.684437	0.9345	0.658368
		13.248	0.786256	0.525383	0.455	0.703898	0.722688	0.486385	0.66111	0.849073	0.465851	0.557499	0.680176	0.827775	0.58826	0.730983	0.716718	0.525383	0.703049	0.637642	0.734076	0.80905	0.762667	0.719896	0.672044	0.627572	0.641003	0.696633		1.04041	0.615103	0.641701	0.754408	0.756956	0.782391	0.848404	0.802162	0.606181	0.822212	0.513071	0.670571	0.637202	0.75383	0.62079	0.909668	0.732186	0.673094	0.919912	0.66419
		13.32	0.793771	0.527919	0.452	0.696814	0.721186	0.483029	0.654118	0.845526	0.469282	0.556436	0.674665	0.823803	0.585451	0.73257	0.733693	0.527919	0.70677	0.636728	0.740784	0.815389	0.761428	0.711872	0.668888	0.62168	0.646406	0.688723		1.03399	0.608107	0.635595	0.748402	0.750096	0.780931	0.856494	0.806981	0.604036	0.824356	0.518892	0.681852	0.641974	0.755575	0.623041	0.899921	0.732992	0.662007	0.911423	0.663669
		13.392	0.784051	0.521806	0.451	0.695784	0.717057	0.478772	0.631862	0.849806	0.471908	0.552202	0.672924	0.827986	0.580494	0.742741	0.728452	0.521806	0.707195	0.633549	0.757798	0.818376	0.754964	0.705375	0.657049	0.616763	0.64945	0.690452		1.03666	0.596549	0.629732	0.743644	0.746749	0.791591	0.86075	0.801777	0.591117	0.832846	0.527733	0.670317	0.631256	0.749862	0.633511	0.898894	0.734509	0.658642	0.908274	0.659687
		13.464	0.781951	0.520948	0.447	0.687573	0.709727	0.470432	0.621376	0.85251	0.47204	0.553771	0.675383	0.818801	0.579326	0.756149	0.727695	0.520948	0.718322	0.630862	0.754374	0.825626	0.743563	0.703031	0.645401	0.619124	0.659971	0.681564		1.02026	0.593245	0.632902	0.749731	0.748624	0.794449	0.856514	0.813678	0.584607	0.841472	0.530097	0.680185	0.635027	0.746957	0.615725	0.884382	0.727112	0.656025	0.915225	0.660476
		13.536	0.789219	0.51923	0.449	0.680582	0.703793	0.465397	0.615942	0.848566	0.467996	0.550613	0.678416	0.82269	0.578146	0.753674	0.715139	0.51923	0.707192	0.63194	0.756669	0.832556	0.7418	0.703874	0.638483	0.613935	0.654066	0.677931		1.03777	0.592932	0.633009	0.745926	0.753883	0.793615	0.852012	0.798775	0.580801	0.848684	0.531708	0.667519	0.62204	0.740004	0.606374	0.895515	0.728784	0.652476	0.89584	0.660951
		13.608	0.773699	0.513361	0.441	0.671464	0.704274	0.463033	0.617128	0.851292	0.460353	0.547665	0.675854	0.827541	0.585487	0.740824	0.711308	0.513361	0.701595	0.635814	0.746308	0.816724	0.744372	0.697806	0.640347	0.606214	0.664425	0.672501		1.028	0.587736	0.640105	0.748821	0.747648	0.807863	0.843296	0.791523	0.572166	0.840881	0.53314	0.661942	0.621094	0.736324	0.587775	0.900682	0.725876	0.650873	0.898893	0.665614
		13.68	0.758501	0.514458	0.437	0.669649	0.699567	0.461691	0.604687	0.84176	0.446808	0.546567	0.68083	0.83358	0.591651	0.71886	0.700247	0.514458	0.692836	0.631664	0.737055	0.811655	0.74325	0.695495	0.647663	0.602444	0.665323	0.671544		1.00607	0.592588	0.648274	0.748093	0.748581	0.809178	0.84173	0.78351	0.574029	0.832324	0.532051	0.658335	0.619185	0.725193	0.57858	0.907886	0.716447	0.644795	0.902183	0.661973
		13.752	0.765423	0.515312	0.434	0.664625	0.698287	0.458359	0.60209	0.827557	0.440627	0.545262	0.680991	0.840849	0.594275	0.7063	0.693167	0.515312	0.671614	0.629186	0.74179	0.812547	0.741325	0.683619	0.652579	0.599366	0.657555	0.67204		0.977041	0.596377	0.652239	0.731358	0.74391	0.804296	0.843854	0.768229	0.573709	0.823953	0.533894	0.647601	0.615209	0.724968	0.573693	0.9079	0.710911	0.64381	0.900915	0.648165
		13.824	0.778371	0.507861	0.428	0.656122	0.691827	0.457549	0.603938	0.821321	0.440689	0.549101	0.671952	0.840867	0.587758	0.699384	0.692245	0.507861	0.676747	0.622024	0.727448	0.792457	0.738848	0.686928	0.655595	0.603858	0.666619	0.667126		0.951196	0.593046	0.661715	0.721029	0.74433	0.813909	0.840641	0.770067	0.576444	0.823248	0.53207	0.663553	0.613583	0.712835	0.559919	0.89598	0.708859	0.648424	0.926473	0.634027
		13.896	0.784469	0.511655	0.425	0.654803	0.689279	0.45053	0.592066	0.833643	0.442836	0.549826	0.672946	0.839618	0.580703	0.700235	0.679003	0.511655	0.659984	0.618508	0.727751	0.800995	0.747917	0.693574	0.648599	0.605084	0.653439	0.662329		0.938735	0.595822	0.659845	0.703442	0.74415	0.79656	0.841068	0.76662	0.572642	0.824209	0.526067	0.654234	0.609521	0.708975	0.553388	0.902959	0.717276	0.63988	0.923811	0.618623
		13.968	0.820099	0.50412	0.413	0.648987	0.680059	0.447709	0.588856	0.842359	0.442079	0.549495	0.667945	0.836647	0.567466	0.706292	0.676476	0.50412	0.665854	0.615991	0.729575	0.786699	0.750753	0.692818	0.642455	0.595302	0.651307	0.655077		0.948173	0.592524	0.655293	0.692259	0.740753	0.812151	0.830343	0.774542	0.571971	0.824434	0.522461	0.66622	0.607652	0.702276	0.55065	0.900212	0.71147	0.638242	0.943384	0.614765
		14.04	0.817972	0.509198	0.406	0.642773	0.676346	0.443942	0.569842	0.842938	0.436176	0.546332	0.669943	0.83137	0.553475	0.703287	0.674131	0.509198	0.652022	0.617936	0.721597	0.77846	0.752839	0.686289	0.634585	0.586973	0.65088	0.649087		0.945687	0.584182	0.644454	0.683455	0.735554	0.829775	0.83008	0.781901	0.571698	0.817813	0.515263	0.662367	0.611784	0.700538	0.554879	0.904778	0.712039	0.631214	0.942013	0.613167
		14.112	0.82302	0.507069	0.401	0.640813	0.679752	0.437844	0.551023	0.836039	0.431262	0.550897	0.670595	0.828614	0.548741	0.697706	0.67549	0.507069	0.658132	0.61797	0.718794	0.768655	0.75332	0.684183	0.626047	0.585742	0.646501	0.653798		0.95874	0.584346	0.639047	0.674589	0.72602	0.832922	0.831614	0.774308	0.568082	0.814327	0.508669	0.671625	0.607834	0.704304	0.557127	0.916984	0.70913	0.627306	0.933362	0.614886
		14.184	0.825869	0.503142	0.399	0.638637	0.678463	0.435525	0.539674	0.816439	0.42543	0.548008	0.662548	0.819182	0.549482	0.696777	0.684523	0.503142	0.647844	0.611774	0.6973	0.768194	0.756793	0.690695	0.616417	0.582074	0.642087	0.638421		0.945616	0.569965	0.643644	0.67336	0.725541	0.845317	0.834127	0.774155	0.572614	0.82025	0.512854	0.686243	0.605966	0.710228	0.546333	0.905517	0.709331	0.630481	0.918154	0.61297
		14.256	0.811125	0.505905	0.398	0.637174	0.678345	0.43358	0.527301	0.808565	0.422995	0.540955	0.660865	0.818903	0.552279	0.691792	0.695953	0.505905	0.643428	0.603618	0.684525	0.785736	0.755166	0.681844	0.615235	0.57659	0.644189	0.634173		0.95471	0.567754	0.641243	0.667575	0.713655	0.833168	0.835351	0.765759	0.558236	0.824825	0.515982	0.691549	0.592428	0.722925	0.541704	0.901289	0.71355	0.631244	0.888624	0.6118
		14.328	0.813708	0.510956	0.394	0.634429	0.676655	0.430187	0.509064	0.800754	0.424136	0.531987	0.649424	0.806002	0.554599	0.691596	0.695949	0.510956	0.649539	0.60028	0.668186	0.778662	0.753381	0.675704	0.625255	0.570377	0.633009	0.624624		0.941635	0.569452	0.642821	0.669217	0.710175	0.837796	0.830361	0.760006	0.559581	0.814847	0.521538	0.701543	0.578079	0.7322	0.534334	0.8824	0.708891	0.630198	0.892942	0.615937
		14.4	0.80733	0.515199	0.397	0.629211	0.679619	0.424389	0.501272	0.802345	0.423418	0.533749	0.651214	0.790812	0.55445	0.695933	0.69248	0.515199	0.637753	0.594605	0.685064	0.787828	0.74868	0.651206	0.633925	0.563296	0.615857	0.636746		0.931988	0.580685	0.639799	0.664514	0.704341	0.828658	0.820134	0.759787	0.5552	0.810272	0.520974	0.688759	0.576971	0.735121	0.537444	0.880551	0.697732	0.627686	0.87536	0.617704
		14.472	0.803675	0.510027	0.39	0.626701	0.685636	0.416516	0.502905	0.799944	0.428616	0.540369	0.638432	0.785828	0.550809	0.69633	0.672543	0.510027	0.646518	0.591655	0.69521	0.766245	0.746844	0.637355	0.637112	0.55784	0.608945	0.640905		0.927449	0.580232	0.63456	0.658437	0.700928	0.83681	0.816252	0.750998	0.558293	0.805345	0.512817	0.684517	0.573792	0.733373	0.536452	0.880476	0.683794	0.627574	0.869585	0.609943
		14.544	0.805727	0.501289	0.39	0.623802	0.67755	0.418274	0.501686	0.785019	0.424089	0.543611	0.640548	0.782507	0.543206	0.692836	0.66906	0.501289	0.656648	0.588857	0.704811	0.744245	0.739067	0.634513	0.625477	0.553295	0.616185	0.624664		0.941563	0.586659	0.63705	0.658461	0.705705	0.844819	0.819856	0.74132	0.553841	0.808425	0.507641	0.674696	0.571691	0.731983	0.53685	0.869587	0.678086	0.627192	0.861329	0.604401
		14.616	0.789455	0.499169	0.39	0.623005	0.675267	0.415831	0.499954	0.776263	0.417487	0.540816	0.65001	0.775917	0.538392	0.685716	0.659597	0.499169	0.645556	0.594084	0.706843	0.710299	0.734889	0.640957	0.616094	0.548173	0.612424	0.610492		0.973424	0.590604	0.638137	0.642818	0.696814	0.835514	0.816936	0.74122	0.542353	0.802961	0.50065	0.669112	0.572764	0.722737	0.5385	0.87131	0.677948	0.624253	0.855775	0.592218
		14.688	0.79966	0.499932	0.38	0.618507	0.665377	0.413186	0.504403	0.771199	0.423824	0.527665	0.648771	0.767815	0.53345	0.686648	0.667512	0.499932	0.650362	0.601387	0.688972	0.681738	0.722247	0.667692	0.606643	0.545967	0.605179	0.610508		0.964059	0.591965	0.636817	0.632199	0.6955	0.842327	0.81244	0.731983	0.538529	0.786524	0.507246	0.680208	0.575484	0.718399	0.530827	0.865258	0.675489	0.629204	0.858598	0.591498
		14.76	0.801792	0.486842	0.382	0.61038	0.662227	0.408405	0.509076	0.787848	0.424652	0.523903	0.654634	0.761371	0.524154	0.67879	0.676661	0.486842	0.645219	0.602078	0.687917	0.669422	0.724432	0.672661	0.608729	0.549268	0.598685	0.627485		0.986392	0.59264	0.628658	0.627637	0.684195	0.822109	0.816017	0.733712	0.529594	0.791051	0.506502	0.667495	0.56448	0.706706	0.525303	0.876705	0.686458	0.629969	0.868405	0.58959
		14.832	0.800002	0.47999	0.379	0.599913	0.665266	0.399009	0.501766	0.801008	0.428629	0.5265	0.655813	0.75971	0.518204	0.681395	0.674066	0.47999	0.657579	0.606309	0.678109	0.663621	0.732193	0.671622	0.59185	0.554574	0.594273	0.644825		0.985004	0.589125	0.621374	0.629676	0.682491	0.790816	0.813491	0.719763	0.527348	0.789471	0.508186	0.685948	0.555065	0.709838	0.518823	0.870318	0.68836	0.62924	0.884069	0.588698
		14.904	0.800145	0.482504	0.38	0.59581	0.667449	0.398734	0.505966	0.798686	0.426211	0.528342	0.656704	0.762557	0.510476	0.69488	0.677929	0.482504	0.670281	0.611763	0.694928	0.670267	0.721958	0.656146	0.580168	0.551748	0.588164	0.65848		0.973123	0.587833	0.61559	0.63048	0.689247	0.787793	0.815724	0.722165	0.529344	0.793684	0.510349	0.674486	0.544142	0.702142	0.505307	0.867958	0.696443	0.629093	0.876813	0.595249
		14.976	0.797404	0.487708	0.374	0.594422	0.669014	0.397387	0.501667	0.77841	0.41996	0.527366	0.660579	0.762381	0.501467	0.703592	0.674862	0.487708	0.672761	0.608574	0.699236	0.679901	0.719157	0.648693	0.565193	0.548009	0.581666	0.659095		0.988123	0.590313	0.611331	0.626912	0.701853	0.788764	0.810928	0.709741	0.530707	0.788368	0.507785	0.672615	0.536204	0.704877	0.497447	0.856307	0.702662	0.619406	0.861116	0.595342
		15.048	0.778255	0.497545	0.363	0.595563	0.66054	0.399967	0.494555	0.747223	0.41717	0.523913	0.65773	0.761446	0.500215	0.697583	0.680828	0.497545	0.673609	0.596114	0.684806	0.687668	0.708764	0.65406	0.56254	0.540327	0.575961	0.643849		0.976321	0.573541	0.609335	0.6214	0.713628	0.798876	0.808471	0.706673	0.525709	0.779991	0.509476	0.678064	0.538028	0.706428	0.49187	0.838414	0.690051	0.616506	0.842658	0.596544
		15.12	0.768252	0.498548	0.362	0.598683	0.653835	0.400735	0.478385	0.721194	0.411863	0.518559	0.65323	0.761919	0.49487	0.691952	0.676619	0.498548	0.673771	0.585202	0.693821	0.685056	0.7025	0.647985	0.566485	0.543294	0.564704	0.632771		0.987087	0.565567	0.600282	0.61512	0.709882	0.827808	0.800279	0.71552	0.517462	0.791558	0.506826	0.660419	0.527592	0.70165	0.492615	0.824298	0.693132	0.613316	0.823799	0.596918
		15.192	0.758066	0.498468	0.364	0.598453	0.658941	0.405928	0.467614	0.704924	0.41133	0.51135	0.650693	0.764151	0.488684	0.686707	0.671325	0.498468	0.659164	0.573565	0.672288	0.679383	0.706753	0.647511	0.562708	0.543082	0.565749	0.622791		0.975119	0.558651	0.595917	0.614722	0.701354	0.834512	0.792144	0.71781	0.513247	0.789872	0.503557	0.667807	0.538561	0.70233	0.497792	0.809349	0.685816	0.608377	0.804593	0.599587
		15.264	0.734115	0.484971	0.369	0.59903	0.663055	0.40341	0.454966	0.700155	0.413508	0.508718	0.646625	0.763845	0.486561	0.688402	0.670349	0.484971	0.66419	0.577064	0.69664	0.675914	0.70156	0.643617	0.560243	0.541852	0.566177	0.604101		0.966546	0.561358	0.593804	0.619204	0.699058	0.819773	0.784971	0.72689	0.505438	0.789046	0.493369	0.657157	0.536259	0.690601	0.502856	0.813404	0.689921	0.598094	0.806551	0.596088
		15.336	0.727107	0.482509	0.372	0.596813	0.661645	0.39582	0.451365	0.700741	0.419503	0.502565	0.64001	0.758925	0.483496	0.694455	0.656884	0.482509	0.663494	0.575657	0.704304	0.677212	0.69251	0.637978	0.550681	0.538475	0.562217	0.600046		0.954793	0.56743	0.600085	0.619308	0.698675	0.802115	0.780632	0.729195	0.498709	0.778069	0.483709	0.652937	0.537175	0.689838	0.508536	0.816226	0.67993	0.586781	0.829233	0.592467
		15.408	0.73076	0.481325	0.376	0.59616	0.662008	0.392585	0.460053	0.700199	0.421357	0.494294	0.637411	0.766296	0.482804	0.693712	0.658935	0.481325	0.66411	0.565383	0.699523	0.655328	0.675654	0.636302	0.539765	0.533145	0.560505	0.612202		0.948719	0.563195	0.602901	0.619826	0.695362	0.781196	0.781132	0.733483	0.494122	0.761639	0.475504	0.651756	0.539612	0.687491	0.511299	0.81783	0.674347	0.583388	0.87044	0.587942
		15.48	0.76278	0.475957	0.38	0.595968	0.659634	0.38945	0.467993	0.705045	0.411349	0.494709	0.619664	0.771405	0.479547	0.696435	0.644737	0.475957	0.654919	0.560812	0.701824	0.656952	0.662471	0.634583	0.532379	0.524631	0.554608	0.615188		0.957751	0.565291	0.604479	0.618453	0.689017	0.768564	0.777291	0.735826	0.493249	0.745084	0.480499	0.654555	0.533028	0.689111	0.504719	0.812289	0.664865	0.585247	0.890345	0.587601
		15.552	0.767876	0.479423	0.377	0.584181	0.656245	0.389768	0.459461	0.712949	0.406796	0.490363	0.616485	0.770779	0.475729	0.697431	0.626664	0.479423	0.632904	0.559603	0.680236	0.654595	0.662389	0.627386	0.532871	0.518018	0.547864	0.637285		0.93138	0.566802	0.59936	0.61452	0.687903	0.773995	0.766492	0.723145	0.491576	0.740392	0.478522	0.655145	0.534469	0.695162	0.497308	0.805901	0.664919	0.580583	0.872445	0.584114
		15.624	0.755552	0.477386	0.372	0.583829	0.652538	0.388212	0.456846	0.718659	0.402445	0.491148	0.615059	0.758021	0.470263	0.709723	0.623113	0.477386	0.627508	0.567582	0.667692	0.654225	0.664771	0.622937	0.541856	0.517526	0.544633	0.628321		0.932933	0.561435	0.593132	0.605338	0.694088	0.763384	0.763454	0.720683	0.489423	0.73302	0.475191	0.654942	0.527907	0.700208	0.489047	0.795002	0.662581	0.580579	0.864731	0.583951
		15.696	0.734333	0.47939	0.364	0.574517	0.652213	0.377915	0.445701	0.737772	0.408071	0.485771	0.610422	0.750771	0.470621	0.72976	0.614196	0.47939	0.628639	0.569478	0.659414	0.645026	0.671285	0.622904	0.549121	0.524661	0.551715	0.633851		0.902806	0.568922	0.592473	0.600146	0.688105	0.788021	0.754705	0.723719	0.488439	0.721052	0.471468	0.650916	0.524017	0.704721	0.490096	0.787599	0.671454	0.580458	0.858568	0.586119
		15.768	0.717668	0.48097	0.351	0.573408	0.654382	0.378657	0.442927	0.741959	0.411897	0.479814	0.603613	0.750456	0.472258	0.741166	0.637278	0.48097	0.620228	0.567828	0.662246	0.636441	0.675958	0.616521	0.540642	0.527634	0.549125	0.636884		0.899525	0.570876	0.588873	0.609304	0.687177	0.787564	0.752821	0.720721	0.486463	0.712906	0.463882	0.645726	0.516278	0.703688	0.49681	0.785427	0.672746	0.586214	0.866132	0.58076
		15.84	0.700879	0.474509	0.349	0.567425	0.656959	0.375528	0.441096	0.73962	0.420191	0.484649	0.594967	0.740496	0.474372	0.735491	0.63465	0.474509	0.634991	0.563179	0.65921	0.635239	0.676652	0.625777	0.529863	0.523512	0.534176	0.639445		0.935641	0.577731	0.587383	0.611092	0.684136	0.802258	0.755567	0.717315	0.484788	0.708778	0.465115	0.638661	0.516236	0.707314	0.500676	0.78015	0.687959	0.589523	0.881569	0.574245
		15.912	0.695497	0.473947	0.344	0.566492	0.654564	0.371113	0.437438	0.727522	0.426775	0.487114	0.58155	0.722853	0.475678	0.720759	0.614288	0.473947	0.633591	0.564269	0.644315	0.645849	0.665516	0.625675	0.529692	0.520771	0.520859	0.640677		0.933328	0.574713	0.592832	0.616483	0.674321	0.803465	0.751821	0.704585	0.48131	0.710695	0.465739	0.637413	0.513361	0.709596	0.498009	0.773468	0.702461	0.587023	0.851121	0.567514
		15.984	0.702851	0.466614	0.348	0.559553	0.641809	0.365999	0.444692	0.737562	0.423503	0.491279	0.575228	0.70681	0.469269	0.696686	0.611377	0.466614	0.628719	0.571272	0.647034	0.674207	0.665281	0.619728	0.528291	0.524758	0.515895	0.647927		0.940731	0.587801	0.597129	0.615897	0.674988	0.799411	0.751079	0.685171	0.476274	0.700018	0.455337	0.633943	0.515945	0.700513	0.499625	0.767854	0.704493	0.585371	0.839959	0.560024
		16.056	0.706845	0.458841	0.345	0.555945	0.631019	0.362125	0.459888	0.737165	0.418691	0.486854	0.57199	0.705836	0.462288	0.681299	0.610092	0.458841	0.619103	0.582409	0.644048	0.692394	0.659772	0.619004	0.530457	0.530693	0.507955	0.648891		0.941483	0.586968	0.596465	0.614853	0.669621	0.792634	0.739373	0.675317	0.481109	0.701972	0.453435	0.631006	0.512393	0.686188	0.496987	0.762382	0.699699	0.588675	0.826275	0.554041
		16.128	0.702238	0.462922	0.348	0.554641	0.623528	0.359817	0.481045	0.749799	0.411936	0.481903	0.564523	0.70412	0.464463	0.668155	0.598247	0.462922	0.611372	0.585626	0.639146	0.701979	0.648552	0.605836	0.537502	0.521151	0.509639	0.657336		0.931694	0.592017	0.584821	0.597838	0.662914	0.769218	0.735642	0.65993	0.481154	0.684037	0.454839	0.630704	0.50899	0.661685	0.498526	0.758558	0.693095	0.5861	0.838835	0.549652
		16.2	0.684563	0.460118	0.349	0.550911	0.617703	0.361102	0.493413	0.745139	0.404045	0.481246	0.564975	0.705388	0.466639	0.664997	0.596005	0.460118	0.618072	0.587554	0.634737	0.714431	0.638937	0.603573	0.527986	0.516514	0.507571	0.653229		0.928252	0.589575	0.58041	0.591605	0.661452	0.785033	0.727745	0.657751	0.475681	0.676653	0.455346	0.634561	0.508932	0.644612	0.492381	0.756808	0.68687	0.586498	0.835526	0.54692
		16.272	0.688528	0.455446	0.348	0.549957	0.615654	0.360283	0.500357	0.726699	0.40234	0.477373	0.56458	0.700914	0.470234	0.673763	0.587393	0.455446	0.616465	0.58131	0.625239	0.707812	0.627825	0.59786	0.515836	0.518946	0.505507	0.653767		0.900168	0.587341	0.578096	0.588885	0.662455	0.764842	0.718201	0.661762	0.478029	0.680602	0.450895	0.643382	0.508744	0.633738	0.501201	0.755186	0.67875	0.581417	0.825478	0.54607
		16.344	0.708591	0.446091	0.346	0.547455	0.614718	0.363761	0.507004	0.693767	0.396444	0.480027	0.542165	0.701471	0.467805	0.678717	0.583453	0.446091	0.6153	0.575073	0.629786	0.69961	0.627605	0.594722	0.51009	0.520144	0.502881	0.647135		0.905071	0.589114	0.577325	0.581654	0.6576	0.74157	0.711071	0.663097	0.477328	0.680808	0.447102	0.648857	0.500922	0.625109	0.514779	0.758941	0.671337	0.568656	0.800395	0.547143
		16.416	0.768383	0.442479	0.341	0.542189	0.60628	0.369794	0.514308	0.701179	0.395643	0.481614	0.540472	0.701587	0.462524	0.668702	0.571404	0.442479	0.619019	0.58112	0.633718	0.697365	0.629801	0.583365	0.505528	0.52022	0.492525	0.650661		0.885453	0.559074	0.577437	0.562219	0.651759	0.760935	0.695613	0.656507	0.480223	0.679209	0.447046	0.654027	0.504504	0.613557	0.517372	0.760365	0.672537	0.553781	0.800512	0.545228
		16.488	0.784453	0.438166	0.348	0.543479	0.599945	0.367618	0.516542	0.694101	0.393806	0.480743	0.537062	0.700677	0.45655	0.665434	0.559752	0.438166	0.609511	0.576828	0.63636	0.683511	0.637265	0.584296	0.499561	0.512561	0.487887	0.644073		0.885379	0.551022	0.570358	0.542189	0.641028	0.771607	0.692054	0.652824	0.481532	0.676396	0.448995	0.647804	0.50177	0.613648	0.509167	0.765489	0.678835	0.550238	0.790517	0.543819
		16.56	0.796318	0.440014	0.346	0.540862	0.588527	0.3669	0.503796	0.72374	0.40096	0.478365	0.536839	0.699963	0.448267	0.660907	0.566854	0.440014	0.602964	0.568393	0.646993	0.668441	0.640487	0.581715	0.486626	0.508836	0.488133	0.637255		0.864598	0.545482	0.569497	0.543577	0.635572	0.79043	0.690923	0.641122	0.48363	0.674699	0.453274	0.647436	0.506677	0.605776	0.505969	0.757892	0.685208	0.553622	0.777918	0.541865
		16.632	0.772276	0.444073	0.351	0.541078	0.58524	0.355798	0.490517	0.744469	0.405221	0.48079	0.540097	0.692682	0.444094	0.658645	0.571137	0.444073	0.598245	0.564321	0.628709	0.648383	0.640385	0.582827	0.476988	0.507072	0.497243	0.632858		0.863203	0.551219	0.580088	0.539653	0.630328	0.778287	0.695583	0.630345	0.479561	0.675588	0.457184	0.645511	0.50517	0.601393	0.503664	0.753666	0.688104	0.550137	0.785322	0.536608
		16.704	0.691027	0.450043	0.349	0.53925	0.59536	0.351388	0.472854	0.747488	0.409227	0.484064	0.549114	0.685278	0.44099	0.658569	0.588931	0.450043	0.605849	0.557353	0.635204	0.653433	0.640979	0.585139	0.474284	0.505364	0.492861	0.62271		0.88685	0.555836	0.589874	0.541543	0.628397	0.78179	0.69344	0.625007	0.480771	0.683576	0.45598	0.647806	0.498648	0.592517	0.506	0.754846	0.683775	0.54487	0.767161	0.537843
		16.776	0.654568	0.448313	0.343	0.539963	0.597813	0.350842	0.46551	0.771986	0.416696	0.48644	0.543696	0.679849	0.436304	0.653628	0.575914	0.448313	0.603629	0.553936	0.631325	0.635257	0.651145	0.57459	0.471642	0.50516	0.489542	0.640445		0.872086	0.556765	0.596591	0.54467	0.62244	0.771488	0.695937	0.635665	0.477894	0.673873	0.460778	0.652853	0.493736	0.598361	0.510885	0.756675	0.679251	0.537947	0.759148	0.546143
		16.848	0.645326	0.449752	0.339	0.542084	0.603382	0.348818	0.459069	0.777369	0.408282	0.484288	0.540354	0.674968	0.432428	0.656335	0.575253	0.449752	0.609974	0.548125	0.623652	0.624027	0.647584	0.585484	0.478963	0.4988	0.471181	0.649318		0.906228	0.553271	0.597937	0.544605	0.615351	0.751863	0.696998	0.638003	0.473505	0.669538	0.454497	0.652414	0.483663	0.593118	0.508824	0.751656	0.66873	0.528644	0.766241	0.546471
		16.92	0.681416	0.459049	0.325	0.539148	0.594171	0.354798	0.464542	0.766361	0.405045	0.483471	0.548447	0.692445	0.433092	0.665201	0.574164	0.459049	0.60179	0.540946	0.634321	0.620551	0.632446	0.575336	0.484318	0.495356	0.462443	0.652227		0.894263	0.558635	0.606832	0.543114	0.617392	0.755727	0.696839	0.642165	0.473666	0.655408	0.448896	0.650794	0.483489	0.607364	0.503084	0.728319	0.657535	0.525505	0.756019	0.543958
		16.992	0.743775	0.467835	0.323	0.534619	0.585853	0.358833	0.434553	0.71396	0.392402	0.476503	0.548748	0.709899	0.433301	0.667503	0.59723	0.467835	0.603461	0.541576	0.62025	0.620349	0.624701	0.580881	0.494566	0.493957	0.453972	0.628161		0.916282	0.568797	0.602972	0.545193	0.616005	0.741432	0.692467	0.631231	0.477306	0.67491	0.441371	0.643282	0.483699	0.61542	0.493259	0.709138	0.654003	0.524472	0.780844	0.541247
		17.064	0.760444	0.46543	0.319	0.520684	0.588134	0.359578	0.439798	0.686876	0.395147	0.469887	0.541518	0.708467	0.43071	0.656426	0.603282	0.46543	0.611725	0.544565	0.633153	0.62155	0.616728	0.57269	0.487791	0.493015	0.438695	0.61327		0.898237	0.580061	0.594021	0.54826	0.599513	0.750981	0.69425	0.630502	0.478316	0.689194	0.437521	0.646001	0.485524	0.609776	0.485502	0.716477	0.659003	0.526366	0.783421	0.534741
		17.136	0.753761	0.446114	0.323	0.50166	0.576139	0.360795	0.418418	0.663696	0.399652	0.456383	0.531741	0.714355	0.429667	0.656812	0.613435	0.446114	0.594947	0.546475	0.658251	0.621916	0.628585	0.561298	0.472381	0.496968	0.418243	0.602958		0.878089	0.571707	0.585325	0.559889	0.600039	0.75925	0.691093	0.624414	0.480151	0.694903	0.430004	0.63946	0.485113	0.607436	0.484591	0.721371	0.660677	0.53331	0.826171	0.539917
		17.208	0.713498	0.438257	0.326	0.488426	0.573181	0.358596	0.429023	0.634666	0.39249	0.453612	0.523382	0.711493	0.424836	0.650432	0.620855	0.438257	0.589401	0.54883	0.632093	0.640663	0.628799	0.573885	0.460495	0.494491	0.399879	0.608375		0.901099	0.57104	0.57149	0.562387	0.601975	0.757465	0.676608	0.63271	0.475128	0.693226	0.40897	0.637249	0.479301	0.58985	0.483781	0.715115	0.654942	0.533518	0.803156	0.536993
		17.28	0.686178	0.437957	0.318	0.481147	0.567432	0.354623	0.425222	0.609526	0.382905	0.450902	0.516821	0.730281	0.418894	0.647336	0.611941	0.437957	0.589854	0.550762	0.650551	0.648694	0.623827	0.578991	0.462043	0.4972	0.390759	0.605266		0.883094	0.558315	0.576025	0.562094	0.614796	0.769816	0.672131	0.645443	0.474299	0.699908	0.394905	0.643409	0.475379	0.574794	0.490168	0.697713	0.653001	0.53883	0.825851	0.542682
		17.352	0.623662	0.442177	0.323	0.473897	0.563114	0.350743	0.398066	0.605654	0.383234	0.453609	0.505204	0.737153	0.412911	0.638407	0.605406	0.442177	0.595934	0.558827	0.641025	0.656769	0.623051	0.576418	0.469649	0.489225	0.399446	0.599932		0.891783	0.577232	0.57858	0.570077	0.621263	0.76603	0.668758	0.661725	0.474801	0.707737	0.383447	0.650757	0.4661	0.569017	0.489879	0.701013	0.651974	0.532708	0.805906	0.539755
		17.424	0.589689	0.439515	0.326	0.471726	0.565087	0.348431	0.424745	0.621912	0.378307	0.447841	0.516702	0.720745	0.410778	0.628582	0.604807	0.439515	0.57618	0.556303	0.641454	0.655691	0.608225	0.572399	0.479047	0.478066	0.404968	0.602017		0.85944	0.582996	0.57197	0.575785	0.618985	0.795668	0.672891	0.681071	0.47256	0.718864	0.379364	0.672026	0.463884	0.564829	0.480708	0.702808	0.640336	0.528198	0.818447	0.544653
		17.496	0.595461	0.443071	0.325	0.465736	0.559014	0.349046	0.414198	0.65162	0.380296	0.444915	0.502741	0.691074	0.406771	0.623555	0.612255	0.443071	0.590024	0.557027	0.6491	0.649755	0.615354	0.575174	0.47003	0.470376	0.407273	0.624665		0.850022	0.566163	0.564339	0.577714	0.617081	0.787766	0.665475	0.683801	0.463556	0.745173	0.381475	0.671233	0.468612	0.587199	0.479791	0.70468	0.629883	0.519597	0.826112	0.544996
		17.568	0.597318	0.443969	0.33	0.459669	0.561647	0.349907	0.434936	0.678602	0.37359	0.435174	0.494453	0.665153	0.404345	0.608473	0.602043	0.443969	0.595441	0.559798	0.640386	0.641962	0.601987	0.567958	0.457733	0.463457	0.413503	0.649772		0.840403	0.583585	0.573485	0.57964	0.608814	0.781526	0.66983	0.682539	0.456804	0.752267	0.375892	0.663539	0.471642	0.58702	0.489706	0.713445	0.626962	0.514909	0.831655	0.544114
		17.64	0.620649	0.425221	0.326	0.458276	0.557047	0.350563	0.446617	0.676442	0.379348	0.434472	0.500072	0.670446	0.401751	0.602105	0.60192	0.425221	0.609573	0.548354	0.616829	0.631984	0.602893	0.555526	0.450167	0.462728	0.414298	0.661379		0.826334	0.560846	0.574222	0.576226	0.608902	0.793292	0.666558	0.66683	0.450997	0.746592	0.38355	0.656811	0.475298	0.582405	0.482623	0.718993	0.640078	0.513643	0.843453	0.541512
		17.712	0.64048	0.423386	0.335	0.45885	0.547756	0.348403	0.45914	0.67955	0.380172	0.431525	0.509318	0.683945	0.393758	0.585545	0.586474	0.423386	0.602691	0.533521	0.616792	0.661045	0.601383	0.554369	0.442625	0.464165	0.410886	0.663641		0.821288	0.567525	0.573447	0.586482	0.606773	0.787687	0.667436	0.64774	0.451652	0.773543	0.379021	0.648508	0.472454	0.598188	0.462193	0.726094	0.644797	0.502918	0.828637	0.538624
		17.784	0.632632	0.402433	0.342	0.447682	0.534763	0.341099	0.503716	0.698919	0.390251	0.425624	0.516759	0.696441	0.389849	0.592841	0.557616	0.402433	0.607738	0.522964	0.61347	0.668864	0.592456	0.561372	0.439695	0.465899	0.406924	0.660134		0.787594	0.563765	0.567966	0.58723	0.592177	0.820923	0.675994	0.639744	0.452147	0.764583	0.383747	0.662935	0.467797	0.581957	0.458391	0.735386	0.636227	0.496497	0.814664	0.53943
		17.856	0.615325	0.388564	0.33	0.442554	0.525577	0.343191	0.484673	0.714415	0.400487	0.426933	0.498431	0.705704	0.390148	0.592891	0.546433	0.388564	0.612816	0.514589	0.607307	0.673133	0.587781	0.565891	0.440043	0.467308	0.391593	0.665795		0.762528	0.557839	0.559512	0.577843	0.585934	0.819985	0.662868	0.627464	0.457006	0.810978	0.377296	0.673018	0.465321	0.586325	0.456787	0.740115	0.631687	0.486627	0.769525	0.548309
		17.928	0.632795	0.382445	0.338	0.435368	0.516767	0.341511	0.484422	0.75291	0.39306	0.429379	0.47816	0.702946	0.389564	0.584415	0.53314	0.382445	0.592584	0.519541	0.578602	0.638255	0.583232	0.569556	0.438965	0.463595	0.371164	0.669552		0.764319	0.566451	0.560113	0.576471	0.590088	0.798479	0.660587	0.622057	0.455921	0.799753	0.374842	0.665969	0.468526	0.566005	0.444388	0.729798	0.61949	0.476404	0.781103	0.54367
		18	0.646488	0.389197	0.327	0.432555	0.496577	0.340774	0.522003	0.735257	0.401789	0.431142	0.465227	0.707585	0.384384	0.601872	0.514713	0.389197	0.605937	0.53342	0.60933	0.633407	0.56725	0.56584	0.438364	0.45969	0.35718	0.693739		0.734977	0.573129	0.555929	0.565702	0.578741	0.78834	0.66094	0.619158	0.457409	0.79733	0.366566	0.668041	0.470467	0.56904	0.431429	0.715614	0.610228	0.475592	0.741895	0.542369
		18.072	0.638127	0.387198	0.327	0.428227	0.48742	0.335349	0.48278	0.751584	0.403327	0.442661	0.432415	0.689223	0.378416	0.602598	0.514957	0.387198	0.605524	0.540071	0.606947	0.600014	0.57255	0.561638	0.443839	0.452899	0.35757	0.696982		0.721456	0.549605	0.556603	0.555608	0.580069	0.729653	0.655481	0.626509	0.449286	0.803713	0.36318	0.64277	0.479	0.569825	0.425554	0.719727	0.609181	0.471575	0.771439	0.534881
		18.144	0.62556	0.392514	0.32	0.427717	0.488047	0.329634	0.544685	0.699226	0.403744	0.448082	0.435701	0.681338	0.376342	0.609787	0.514911	0.392514	0.597158	0.542046	0.611671	0.57776	0.564028	0.552967	0.437593	0.436588	0.375679	0.698488		0.753318	0.520146	0.560944	0.560138	0.588941	0.711173	0.661122	0.621842	0.447899	0.800761	0.369782	0.636046	0.47951	0.552896	0.431513	0.709647	0.614977	0.465453	0.784381	0.540023
		18.216	0.587671	0.397667	0.307	0.422847	0.494678	0.328634	0.504846	0.678559	0.394981	0.444173	0.439583	0.690139	0.373286	0.592084	0.527867	0.397667	0.605443	0.543312	0.625414	0.575399	0.557691	0.541155	0.423574	0.424936	0.392442	0.692659		0.759	0.518701	0.562222	0.548331	0.596645	0.706655	0.661092	0.627159	0.445153	0.803636	0.371828	0.644652	0.476198	0.547014	0.441007	0.693357	0.621217	0.458257	0.802347	0.539598
		18.288	0.575231	0.39061	0.307	0.411885	0.505278	0.334151	0.491245	0.636779	0.395201	0.430447	0.446978	0.703312	0.37053	0.571194	0.538715	0.39061	0.589023	0.544814	0.608128	0.572464	0.550517	0.542044	0.410789	0.40851	0.403551	0.687577		0.776602	0.536447	0.552047	0.543595	0.603723	0.719592	0.649511	0.622869	0.435423	0.792848	0.369902	0.652264	0.473995	0.53645	0.452988	0.694863	0.630207	0.456819	0.802703	0.535876
		18.36	0.602134	0.38196	0.293	0.400001	0.506233	0.341557	0.509747	0.658256	0.404549	0.430189	0.46995	0.704598	0.369904	0.562479	0.551591	0.38196	0.594996	0.551498	0.621967	0.570205	0.541121	0.530336	0.404553	0.402976	0.401427	0.692976		0.762015	0.532841	0.570774	0.523111	0.599628	0.695277	0.649283	0.624877	0.422837	0.790356	0.362975	0.658194	0.462433	0.523818	0.451907	0.693138	0.652023	0.458218	0.792435	0.551714
		18.432	0.606433	0.36993	0.301	0.388873	0.506329	0.334685	0.391048	0.652564	0.403616	0.431003	0.454826	0.703537	0.362883	0.51562	0.566567	0.36993	0.589885	0.553802	0.594145	0.547489	0.543429	0.519198	0.412789	0.414891	0.388725	0.68682		0.774789	0.528966	0.566837	0.499421	0.605054	0.75789	0.641158	0.647237	0.407511	0.815447	0.353729	0.653014	0.454678	0.5249	0.447252	0.699197	0.661637	0.440172	0.773731	0.555211
		18.504	0.616171	0.357627	0.286	0.378483	0.498058	0.322993	0.424505	0.612773	0.39223	0.436361	0.42644	0.698063	0.357845	0.516422	0.602006	0.357627	0.592334	0.544578	0.587178	0.52393	0.534562	0.49904	0.412106	0.4188	0.381088	0.692488		0.744307	0.524184	0.573584	0.486605	0.594279	0.72664	0.641538	0.670351	0.39759	0.801684	0.357442	0.64939	0.449551	0.509351	0.427369	0.682119	0.663216	0.417446	0.774171	0.554482
		18.576	0.595748	0.384508	0.289	0.372773	0.496939	0.307097	0.341763	0.612424	0.380505	0.430456	0.415407	0.721119	0.353858	0.504376	0.593916	0.384508	0.596097	0.519169	0.542932	0.512017	0.531292	0.494823	0.396384	0.413747	0.374101	0.686226		0.726286	0.496337	0.57588	0.483107	0.602736	0.716415	0.643832	0.680575	0.399892	0.872677	0.361442	0.64918	0.446138	0.482789	0.420883	0.672855	0.642487	0.399194	0.781415	0.531983
		18.648	0.566162	0.390322	0.274	0.374318	0.50632	0.300288	0.335901	0.583328	0.373312	0.430515	0.396918	0.750862	0.350053	0.498548	0.607799	0.390322	0.579182	0.50485	0.522063	0.482191	0.525563	0.500468	0.379709	0.413337	0.389634	0.673857		0.740087	0.465248	0.580112	0.491136	0.604558	0.787664	0.640171	0.665983	0.425024	0.802887	0.374336	0.645413	0.447278	0.470431	0.421705	0.660759	0.634218	0.400419	0.785143	0.521511
		18.72	0.59958	0.399257	0.287	0.37228	0.512449	0.297539	0.320188	0.583345	0.372032	0.422456	0.397107	0.754038	0.343091	0.491672	0.623312	0.399257	0.584698	0.499173	0.523784	0.458162	0.528048	0.499801	0.378764	0.406656	0.386912	0.633945		0.741533	0.488802	0.578365	0.499186	0.619117	0.721219	0.642092	0.644779	0.431021	0.828772	0.37412	0.649069	0.44739	0.482141	0.408783	0.657764	0.619463	0.400015	0.796138	0.520146
		18.792	0.612391	0.409661	0.282	0.369072	0.515958	0.297034	0.156298	0.524547	0.373837	0.41506	0.41322	0.757261	0.340924	0.467423	0.649182	0.409661	0.588879	0.510941	0.486953	0.454039	0.54165	0.508388	0.387083	0.402603	0.363576	0.606985		0.76094	0.510374	0.584982	0.503103	0.641626	0.725844	0.659257	0.612878	0.420881	0.879914	0.356421	0.65119	0.436901	0.50989	0.41717	0.664736	0.633099	0.406744	0.791232	0.510574
		18.864	0.57104	0.393507	0.253	0.363352	0.500265	0.299754	0.378138	0.497743	0.377583	0.425903	0.394991	0.752348	0.335958	0.459057	0.671418	0.393507	0.604266	0.534283	0.47481	0.469798	0.539374	0.509057	0.40939	0.393906	0.337509	0.610631		0.746669	0.522868	0.587215	0.48487	0.656311	0.788918	0.650582	0.598787	0.403942	0.788001	0.338902	0.617911	0.431468	0.521786	0.435388	0.684696	0.641923	0.400312	0.824215	0.512065
		18.936	0.488755	0.411828	0.259	0.366264	0.487969	0.310931	0.228746	0.476642	0.380877	0.419034	0.392674	0.757138	0.330819	0.445962	0.680597	0.411828	0.581341	0.558627	0.447279	0.474761	0.554302	0.518515	0.411815	0.38477	0.322166	0.645961		0.759938	0.553516	0.582583	0.472656	0.658659	0.777174	0.638727	0.636233	0.398507	0.746663	0.324675	0.617847	0.418889	0.546869	0.461992	0.702958	0.626908	0.395093	0.850885	0.506936
		19.008	0.460464	0.40231	0.26	0.369426	0.481906	0.31927	0.373675	0.501851	0.39113	0.419331	0.395445	0.742434	0.332332	0.44042	0.682923	0.40231	0.606802	0.549837	0.481746	0.4516	0.57236	0.50776	0.407027	0.383398	0.317417	0.655081		0.788181	0.539284	0.569905	0.450267	0.664866	0.845421	0.61718	0.660004	0.402699	0.735116	0.316626	0.56083	0.421906	0.55142	0.45309	0.755977	0.613942	0.390553	0.852059	0.513088
		19.08	0.484933	0.416614	0.267	0.37548	0.483356	0.321244	0.329487	0.547445	0.416285	0.401798	0.402398	0.70565	0.338861	0.467594	0.676152	0.416614	0.599409	0.532722	0.475721	0.45399	0.589934	0.499212	0.410257	0.367671	0.317639	0.635119		0.77464	0.536934	0.569649	0.430691	0.675237	0.79187	0.591903	0.692964	0.391515	0.797354	0.310121	0.54365	0.425182	0.540905	0.432912	0.755687	0.611874	0.388573	0.882329	0.50536
		19.152	0.545307	0.429466	0.281	0.375838	0.479501	0.32266	0.210262	0.517337	0.421508	0.392194	0.41456	0.650101	0.341988	0.46079	0.670838	0.429466	0.642811	0.522751	0.475642	0.412772	0.622858	0.493822	0.381573	0.355562	0.317121	0.604983		0.806474	0.551896	0.568149	0.457105	0.680206	0.733342	0.570902	0.707581	0.395986	0.765728	0.311375	0.514898	0.421786	0.572374	0.425304	0.774142	0.588851	0.395423	0.90299	0.494521
		19.224	0.605297	0.443705	0.252	0.363534	0.461119	0.339356	0.499736	0.511301	0.412384	0.384529	0.383195	0.629032	0.340867	0.42187	0.680169	0.443705	0.621059	0.517175	0.451227	0.380898	0.592302	0.505995	0.384192	0.340396	0.329152	0.570184		0.803941	0.499205	0.57548	0.475818	0.717762	0.691424	0.553198	0.719849	0.404126	0.821331	0.308368	0.511085	0.418269	0.603774	0.452695	0.784426	0.581499	0.399634	0.864331	0.514806
		19.296	0.685994	0.446669	0.225	0.364179	0.448361	0.330385	0.523756	0.486352	0.398396	0.376097	0.346004	0.614673	0.333613	0.387847	0.636979	0.446669	0.630769	0.517273	0.436008	0.380618	0.577042	0.506973	0.372932	0.324599	0.347976	0.513778		0.747956	0.536834	0.583604	0.507211	0.739196	0.630051	0.550491	0.701369	0.409653	0.770702	0.307321	0.540942	0.411176	0.583067	0.468844	0.804033	0.566394	0.401296	0.827556	0.516158
		19.368	0.690124	0.458564	0.221	0.383747	0.464318	0.346026	0.620999	0.511878	0.356813	0.380494	0.251316	0.573428	0.324589	0.380437	0.612206	0.458564	0.65962	0.5022	0.41508	0.392467	0.568652	0.569584	0.360292	0.303459	0.349166	0.495463		0.772997	0.536216	0.568011	0.509599	0.759413	0.693775	0.555772	0.728914	0.410463	0.786713	0.319786	0.521842	0.394477	0.574621	0.447523	0.813458	0.569224	0.421945	0.851075	0.524379
		19.44	0.61594	0.413526	0.247	0.404033	0.471697	0.340191	0.521098	0.493525	0.317014	0.382214	0.204928	0.532341	0.316288	0.385524	0.614961	0.413526	0.644045	0.498321	0.363449	0.456891	0.566459	0.544788	0.353256	0.290747	0.327851	0.493818		0.743589	0.601016	0.534782	0.498624	0.690255	0.74263	0.584054	0.774237	0.3857	0.692492	0.318408	0.530111	0.401901	0.590957	0.440825	0.762643	0.56252	0.436334	0.730221	0.503982
		19.512	0.653942	0.360583	0.248	0.40796	0.492591	0.335661	0.584684	0.510086	0.291907	0.391591	0.222536	0.510662	0.308715	0.414175	0.624596	0.360583	0.681597	0.490235	0.376606	0.506781	0.55331	0.526304	0.328175	0.277292	0.319749	0.512166		0.830152	0.57701	0.505822	0.442142	0.636771	0.719222	0.604011	0.887168	0.354578	0.579567	0.316419	0.521852	0.395622	0.615105	0.450746	0.712991	0.562535	0.408123	0.717758	0.494905
		19.584	0.625253	0.328928	0.303	0.429616	0.494872	0.323931	0.649849	0.538827	0.294931	0.374306	0.0393559	0.502623	0.298698	0.439958	0.643415	0.328928	0.592716	0.507306	0.367144	0.485641	0.555211	0.498198	0.336821	0.286862	0.350442	0.515698		0.862875	0.552728	0.484642	0.432912	0.588096	0.690868	0.600267	0.805544	0.323641	0.551802	0.322481	0.514419	0.389042	0.610096	0.449481	0.701994	0.592859	0.373701	0.638728	0.493809
		19.656	0.555291	0.313429	0.287	0.455694	0.507561	0.322705	0.677243	0.353747	0.270053	0.366709	0.321196	0.514585	0.294076	0.47406	0.651649	0.313429	0.667434	0.518048	0.399469	0.504935	0.523516	0.461414	0.308738	0.319106	0.421368	0.509989		0.867915	0.472705	0.499218	0.451012	0.555706	0.748726	0.598322	0.625611	0.380775	0.517658	0.296891	0.523236	0.380318	0.604351	0.434685	0.643825	0.596472	0.358626	0.67662	0.483513
		19.728	0.555205	0.32432	0.293	0.472315	0.46237	0.343389	0.590258	0.121221	0.255246	0.427821	0.405137	0.538728	0.276728	0.493631	0.672253	0.32432	0.543382	0.558493	0.357211	0.516402	0.494431	0.396547	0.295864	0.372483	0.461379	0.537242		0.907565	0.479672	0.524575	0.446883	0.518372	0.724003	0.603518	0.417986	0.466384	0.538575	0.346985	0.486727	0.383859	0.636303	0.40505	0.526043	0.644903	0.372356	0.715441	0.489762
		19.8	0.549146	0.472329	0.338	0.492595	0.444806	0.389556	0.66759	0.104771	0.189644	0.400261	0.517455	0.575432	0.270821	0.445071	0.648877	0.472329	0.475101	0.560622	0.323097	0.363038	0.472336	0.377739	0.199617	0.367	0.412636	0.683693		0.71697	0.451788	0.510362	0.253716	0.510591	1.09719	0.587268	0.349686	0.582707	0.487165	0.284326	0.429642	0.393761	0.586769	0.443447	0.607146	0.738792	0.33239	0.614584	0.469805
		19.872	0.66657	0.872504	0.257	0.573186	0.43334	0.414403	0.866728	0	0.202786	0.431869	0.428426	0.569256	0.256693	0.458328	0.648048	0.872504	0.532498	0.565334	0.267451	0.497845	0.462645	0.280411	0.209757	0.343268	0.359851	0.986238		0.66731	0.444241	0.512506	0.246024	0.544894	0.833847	0.638721	0.328053	0.514451	0.42139	0.308979	0.46541	0.394413	0.424055	0.404329	0.704353	0.881801	0.29409	0.708351	0.481597
		19.944	1.52071	0.445009	0.695	0.488724	0.453715	0.504832	0.903496	3.73486	0.176238	0.335684		0.567617	0.270122	0.440028	0.728189	0.445009	2.15028	0.604659	0.204736	0.404225	0.528025	0.353026	0.308743	0.381635	0.320139	0.741826			0.528491	0.462262	0.262863	0.458659	2.28788	0.660225	0.56829	0.387319	0.153824	0.211767	0.241619	0.44372	0.307691	0.4677	1.03971	0.775535	0.283889	1.95978	0.441931
		20.016	0.937282		1.124	0.423001				13.87	0.118554		0.444799	0.557444	0.289856	0.489038	0.627916		0.603299	0.587243	0.22118	0.64822	0.569696	0.296472	0.374187	0.459591	0.349479	0.728656		0.720754		0.346026	0.512328	0.456387			0.925411	0.411436	0.47185		0.491802		0.321251	0.522065	1.12857	0.783882	0.224196	1.54951	0.279703
		20.088		0.239798			0.938328	0.356106	0.856558			0.298885	0.000866472					0.239798												0.81706	0.413274				1.16559	0.83798				0.348482		0.406664
									889.623
									876.364
									868.689
									853.787
[truncated: 93 more columns]

## Sheet: Sheet1
Figure 8 - Figure supplement 1			(see KIF5B-KO data to the right)
MAP7	CONTROL
		Cell radius (mm)	MAP7	Tubulin	MAP7(norm)	Tubulin(norm)	MAP7/Tub		MAP7	Tubulin	MAP7(norm)	Tubulin(norm)	MAP7/Tub		MAP7	Tubulin	MAP7(norm)	Tubulin(norm)	MAP7/Tub		MAP7	Tubulin	MAP7(norm)	Tubulin(norm)	MAP7/Tub			MAP7	Tubulin	MAP7(norm)	Tubulin(norm)	MAP7/Tub		MAP7	Tubulin	MAP7(norm)	Tubulin(norm)	MAP7/Tub		MAP7	Tubulin	MAP7(norm)	Tubulin(norm)	MAP7/Tub		MAP7	Tubulin	MAP7(norm)	Tubulin(norm)
		0	4711000	3027000	0.579921	0.480681	1.20646		6595000	6457000	0.528742	0.480357	1.10073		10388333	10034667	0.763583	0.735805	1.03775		8696000	11963000	0.857573	0.944448	0.908015			8081000	10075750	0.993976	0.865734	1.14813		15288000	15916000	1.00361	1.00025	1.00336		7688000	7121500	0.78886	0.579477	1.36133		7731000	6301000	0.764177	0.427697
		0.072	4678500	2982250	0.57468	0.470222	1.22215		6508250	6472500	0.51867	0.482474	1.07502		10432200	9986800	0.767181	0.731553	1.0487		8679750	11948500	0.855744	0.943101	0.907372			8124800	10012800	1	0.859543	1.16341		15121250	15909000	0.991889	0.999765	0.992122		7628500	7264000	0.781399	0.594632	1.31409		7801500	6361750	0.774541	0.437004
		0.144	4643800	3009200	0.569083	0.476521	1.19425		6527000	6505400	0.520847	0.486968	1.06957		10562333	10071667	0.777851	0.739092	1.05244		8859800	12036000	0.876007	0.951227	0.920923			8074500	9904500	0.993082	0.848893	1.16986		15236600	15912400	1	1	1		7699400	7455400	0.79029	0.614989	1.28505		7755200	6340800	0.767734	0.433794
		0.216	4695833	3027500	0.577475	0.480798	1.20108		6671667	6542333	0.537643	0.492013	1.09274		10692286	10087286	0.788508	0.740479	1.06486		8836500	12002500	0.873385	0.948116	0.92118			7992700	9874100	0.981832	0.845903	1.16069		15154000	15809333	0.994192	0.992879	1.00132		7781667	7513000	0.800607	0.621115	1.28898		7766833	6329500	0.769444	0.432063
		0.288	4627900	3053700	0.566519	0.486922	1.16347		6853500	6581500	0.558754	0.497362	1.12343		10748091	10159182	0.793084	0.746866	1.06188		8863500	11954700	0.876424	0.943677	0.928733			8028889	9892667	0.986809	0.847729	1.16406		14941900	15599200	0.979279	0.97836	1.00094		7862500	7515900	0.810744	0.621423	1.30466		7687700	6281900	0.757812	0.424771
		0.36	4635556	3174444	0.567754	0.515144	1.10212		6938000	6631333	0.568565	0.504169	1.12773		10869900	10197500	0.803072	0.75027	1.07038		8756444	12078556	0.864375	0.955179	0.904935			8012750	9899083	0.984589	0.84836	1.16058		14766333	15408223	0.966934	0.965165	1.00183		7983333	7530778	0.825898	0.623006	1.32567		7618111	6299778	0.747582	0.42751
		0.432	4613917	3175583	0.564264	0.515411	1.09478		7045417	6754583	0.581036	0.521004	1.11522		11011846	10231000	0.814712	0.753246	1.0816		8874083	12095750	0.877615	0.956776	0.917263			7972429	9913357	0.979044	0.849764	1.15214		14763750	15471583	0.966752	0.969543	0.997121		8021000	7688000	0.830621	0.639727	1.2984		7657417	6320500	0.75336	0.430684
		0.504	4739357	3194714	0.584495	0.519882	1.12428		7178071	6880429	0.596437	0.538194	1.10822		11156400	10336400	0.826565	0.762609	1.08387		8905429	12145357	0.881143	0.961383	0.916537			7996357	9895000	0.982335	0.847958	1.15847		14375071	15322214	0.939423	0.959223	0.979358		7941357	7670857	0.820633	0.637904	1.28645		7679643	6275357	0.756627	0.423769
		0.576	4773143	3187143	0.589944	0.518113	1.13864		7271643	6996071	0.607301	0.553989	1.09623		11202200	10384733	0.830321	0.766903	1.08269		9076357	12286786	0.90038	0.974517	0.923924			7978235	9900235	0.979843	0.848473	1.15483		14244786	15158571	0.930262	0.947916	0.981376		7885000	7658286	0.813566	0.636567	1.27805		7679000	6250143	0.756533	0.419906
		0.648	4891706	3166529	0.609066	0.513294	1.18658		7411353	7135882	0.623522	0.573086	1.08801		11288667	10429056	0.837411	0.77084	1.08636		9020353	12111883	0.894077	0.958274	0.933007			7944875	9865250	0.975254	0.845033	1.1541		13876353	15097706	0.904356	0.943711	0.958298		7845941	7679706	0.808667	0.638845	1.26583		7668471	6251118	0.754985	0.420056
		0.72	5033625	3126125	0.631955	0.503851	1.25425		7484625	7197750	0.632029	0.581537	1.08682		11358529	10506471	0.84314	0.777717	1.08412		8994875	12096188	0.891209	0.956817	0.931432			7893600	9823600	0.968203	0.840937	1.15134		13680375	15050062	0.890576	0.940419	0.946999		7835438	7722625	0.80735	0.64341	1.2548		7604750	6264875	0.745618	0.422163
		0.792	5082900	3108050	0.639903	0.499626	1.28076		7627600	7258450	0.648628	0.589828	1.09969		11559714	10668810	0.859637	0.792138	1.08521		8923400	12051800	0.883165	0.952694	0.927018			7866957	9777913	0.964538	0.836444	1.15314		13349750	14957600	0.867329	0.934031	0.928587		7892200	7805550	0.814469	0.652229	1.24875		7558350	6235100	0.738797	0.417602
		0.864	5090174	3136870	0.641076	0.506362	1.26604		7737522	7366391	0.66139	0.604572	1.09398		11831000	10740417	0.881883	0.798499	1.10442		8830392	11975782	0.872698	0.945635	0.92287			7851273	9802000	0.962381	0.838813	1.14731		13219348	15004479	0.85816	0.93727	0.915595		7972522	7889478	0.824542	0.661155	1.24712		7543826	6201435	0.736662	0.412445
		0.936	5105364	3125727	0.643526	0.503758	1.27745		7912909	7422455	0.681753	0.612229	1.11356		12023956	10837174	0.897705	0.807095	1.11227		8953637	11978863	0.886568	0.945921	0.937254			7840250	9774125	0.960865	0.836071	1.14926		13225454	15004682	0.858589	0.937284	0.91604		7997091	8004727	0.827623	0.673413	1.229		7529864	6228409	0.734609	0.416577
		1.008	5025833	3131375	0.630699	0.505078	1.24872		8169958	7630333	0.711597	0.640624	1.11079		12171920	10982000	0.909838	0.81996	1.10961		8873958	11791458	0.877601	0.928517	0.945164			7833250	9783708	0.959902	0.837014	1.14682		13143583	15090708	0.852833	0.943228	0.904164		8089792	8116917	0.839248	0.685345	1.22456		7514333	6217667	0.732326	0.414931
		1.08	5040500	3167458	0.633064	0.513512	1.23281		8398167	7755333	0.738092	0.657698	1.12224		12267840	11111440	0.917704	0.831459	1.10373		8832333	11697708	0.872916	0.91981	0.949018			7799793	9761862	0.955301	0.834865	1.14426		13102792	15167417	0.849964	0.948528	0.896088		8123750	8192250	0.843507	0.693357	1.21656		7499125	6171708	0.730091	0.407891
		1.152	4959000	3135690	0.61992	0.506086	1.22493		8635862	7933965	0.765689	0.682097	1.12255		12416333	11174066	0.92988	0.837022	1.11094		8785379	11664069	0.867632	0.916686	0.946487			7796700	9739733	0.954876	0.832689	1.14674		13026793	15184000	0.844621	0.949673	0.88938		8178000	8209827	0.85031	0.695226	1.22307		7502311	6141448	0.730559	0.403255
		1.224	4992367	3176133	0.625301	0.515539	1.21291		8778600	8090167	0.782261	0.703433	1.11206		12529000	11266678	0.939119	0.845249	1.11106		8881934	11749767	0.878498	0.924645	0.950093			7745433	9713400	0.947825	0.830099	1.14182		13046100	15280400	0.845978	0.956334	0.884606		8273033	8370366	0.862228	0.7123	1.21048		7503100	6167133	0.730675	0.40719
		1.296	4925967	3138900	0.614592	0.506837	1.2126		8941500	8236733	0.801174	0.723452	1.10743		12602354	11386613	0.945134	0.855903	1.10425		8960600	11736434	0.887352	0.923407	0.960954			7697161	9699483	0.941186	0.828731	1.1357		12913833	15361233	0.836678	0.961919	0.869801		8212767	8424700	0.85467	0.718079	1.19022		7518600	6195533	0.732954	0.411541
		1.368	4956097	3157742	0.619451	0.511241	1.21166		9062613	8356646	0.815235	0.739832	1.10192		12642156	11445844	0.948398	0.861165	1.1013		8950807	11747419	0.88625	0.924427	0.958702			7650694	9703723	0.934795	0.829148	1.12742		12897903	15388839	0.835558	0.963826	0.866918		8191226	8558129	0.851969	0.73227	1.16346		7541548	6206839	0.736327	0.413273
		1.44	4926417	3148167	0.614665	0.509003	1.20759		9172333	8487194	0.827974	0.757663	1.0928		12709946	11544486	0.953956	0.869928	1.09659		8884861	11800389	0.878828	0.929346	0.945641			7649500	9723235	0.934631	0.831067	1.12462		12924361	15337583	0.837418	0.960285	0.872052		8359361	8809583	0.873055	0.759013	1.15025		7548000	6241306	0.737275	0.418553
		1.512	5001824	3193529	0.626826	0.519605	1.20635		9318471	8547500	0.844941	0.7659	1.1032		12758257	11611714	0.957918	0.8759	1.09364		9023765	11955471	0.894461	0.943749	0.947774			7595314	9707429	0.927179	0.829512	1.11774		12824941	15279971	0.830428	0.956304	0.868372		8486677	9004588	0.889021	0.779753	1.14013		7521559	6238265	0.733389	0.418087
		1.584	4944943	3177800	0.617653	0.515929	1.19717		9447400	8661257	0.85991	0.781439	1.10042		12758556	11640083	0.957942	0.87842	1.09053		8991429	11962114	0.890821	0.944365	0.943302			7595131	9696158	0.927153	0.828404	1.1192		12797286	15300429	0.828483	0.957718	0.86506		8794714	9304229	0.927651	0.811622	1.14296		7523514	6196600	0.733676	0.411704
		1.656	4963316	3215579	0.620616	0.524759	1.18267		9492395	8760632	0.865134	0.795012	1.0882		12810718	11764410	0.96222	0.889465	1.0818		8960579	12014815	0.887349	0.94926	0.93478			7577643	9690881	0.924748	0.827885	1.117		12532947	15124368	0.809897	0.945553	0.856532		8819974	9340315	0.930819	0.81546	1.14147		7486026	6167869	0.728165	0.407303
		1.728	4995429	3250786	0.625795	0.532988	1.17413		9560904	8847500	0.873088	0.806878	1.08206		12771488	11804581	0.959003	0.893033	1.07387		8987214	12063071	0.890347	0.953741	0.933531			7601273	9687613	0.927998	0.827564	1.12136		12307071	15047381	0.794014	0.940234	0.844486		9005096	9629286	0.954035	0.846193	1.12744		7421333	6132643	0.718655	0.401906
		1.8	4934091	3228818	0.615902	0.527854	1.1668		9652228	8942568	0.883691	0.819863	1.07785		12868200	11916066	0.966933	0.902937	1.07088		9045296	12065863	0.896884	0.954	0.940129			7549341	9677512	0.920856	0.82657	1.11407		12001704	14867772	0.772543	0.927825	0.832639		9073409	9850818	0.962602	0.869755	1.10675		7363955	6087205	0.71022	0.394946
		1.872	4934708	3271951	0.616002	0.537935	1.14512		9798220	9118927	0.900641	0.843952	1.06717		12856452	11948738	0.96597	0.905839	1.06638		9076049	12104171	0.900345	0.957558	0.940251			7574952	9714714	0.924378	0.830229	1.1134		11760585	14739171	0.755589	0.918939	0.822241		9107293	10058073	0.966851	0.891797	1.08416		7358000	6049000	0.709345	0.389093
		1.944	5006286	3346357	0.627546	0.555327	1.13005		9884452	9182881	0.910652	0.852688	1.06798		12838768	12012303	0.96452	0.911486	1.05818		9149786	12180048	0.908644	0.964605	0.941985			7492188	9614250	0.912995	0.820349	1.11294		11605523	14583977	0.744686	0.908217	0.819943		9227333	10318690	0.981905	0.919515	1.06785		7331095	6079881	0.70539	0.393824
		2.016	4978208	3347750	0.623018	0.555652	1.12124		10014917	9412708	0.925799	0.88408	1.04719		12912266	12081878	0.970547	0.917666	1.05762		9052271	12121146	0.897669	0.959135	0.935915			7581021	9679383	0.925213	0.826754	1.11909		11459208	14478438	0.734398	0.900925	0.81516		9125958	10291667	0.969192	0.916641	1.05733		7319958	6118875	0.703753	0.399797
		2.088	5146851	3430702	0.650217	0.575041	1.13073		10097851	9441149	0.935428	0.887965	1.05345		12989500	12093229	0.97688	0.918675	1.06336		9184489	12233085	0.912549	0.96953	0.941228			7492615	9652192	0.913054	0.82408	1.10797		11319213	14405639	0.724555	0.895895	0.80875		9250383	10554468	0.984796	0.944592	1.04256		7292191	6068553	0.699671	0.392088
		2.16	5093692	3402385	0.641643	0.568423	1.12881		10161462	9567096	0.942813	0.905168	1.04159		13033547	12172075	0.980492	0.925679	1.05921		9232230	12284135	0.917922	0.974271	0.942163			7496920	9650160	0.913646	0.82388	1.10895		11142635	14285654	0.712139	0.887605	0.802315		9332404	10690904	0.995082	0.959102	1.03751		7216577	6023058	0.688555	0.385119
		2.232	5301100	3516580	0.675095	0.595114	1.1344		10247240	9611200	0.952772	0.911192	1.04563		12967274	12215765	0.975057	0.92956	1.04894		9391400	12345780	0.935836	0.979996	0.954938			7410077	9557654	0.901702	0.814783	1.10668		11027840	14274280	0.704067	0.886819	0.793924		9371620	10818100	1	0.97263	1.02814		7175400	5984700	0.682502	0.379243
		2.304	5262961	3500404	0.668943	0.591333	1.13125		10324365	9809462	0.961727	0.938273	1.025		12998170	12287396	0.977591	0.935923	1.04452		9403423	12308270	0.937189	0.976513	0.959731			7420386	9581842	0.90312	0.817162	1.10519		10882038	14152730	0.693815	0.878421	0.789844		9300520	10892846	0.991083	0.98058	1.01071		7188211	6007519	0.684385	0.382739
		2.376	5472930	3632438	0.702808	0.622194	1.12956		10445842	9894632	0.97583	0.949907	1.02729		13012345	12357293	0.978753	0.942133	1.03887		9549176	12355158	0.953593	0.980867	0.972194			7397115	9597404	0.89992	0.818692	1.09922		10812720	14079789	0.688941	0.873381	0.788821		9227088	11031877	0.981875	0.995367	0.986445		7181825	5998175	0.683447	0.381307
		2.448	5495481	3674115	0.706445	0.631936	1.11791		10590538	9972750	0.99263	0.960577	1.03337		13008604	12410868	0.978446	0.946892	1.03332		9666770	12411520	0.966827	0.986101	0.980454			7340983	9545448	0.8922	0.813583	1.09663		10705385	14069038	0.681394	0.872638	0.780844		9072077	11075442	0.962435	1	0.962435		7134827	5967731	0.676538	0.376643
		2.52	5588052	3724707	0.721375	0.643761	1.12056		10584759	10066034	0.991959	0.973319	1.01915		13056864	12460813	0.982404	0.951329	1.03266		9660207	12426931	0.966088	0.987532	0.978285			7347649	9590211	0.893117	0.817985	1.09185		10589414	13984966	0.67324	0.86683	0.776669		8938121	11011069	0.945636	0.993154	0.952155		7133017	5999414	0.676272	0.381497
		2.592	5781210	3890193	0.752528	0.682441	1.1027		10654018	10093509	1	0.977071	1.02347		13051655	12457741	0.981977	0.951056	1.03251		9776667	12438018	0.979195	0.988562	0.990525			7210875	9495500	0.874306	0.808671	1.08116		10583211	14110386	0.672804	0.875495	0.768484		8699877	10895176	0.915758	0.980828	0.933658		7087105	6035246	0.669523	0.386986
		2.664	5993859	4039141	0.786825	0.717256	1.09699		10603672	10175297	0.994155	0.988243	1.00598		13117230	12582169	0.987354	0.962109	1.02624		9713422	12408938	0.972077	0.985861	0.986018			7275484	9591032	0.883192	0.818065	1.07961		10430969	13978250	0.662099	0.866366	0.764226		8598578	10765109	0.903054	0.966994	0.933877		7048703	6055172	0.663877	0.390039
		2.736	6034758	4073613	0.793421	0.725313	1.0939		10636436	10175129	0.997959	0.98822	1.00985		13129365	12620396	0.988349	0.965505	1.02366		9860854	12471193	0.98867	0.991643	0.997002			7333949	9666187	0.891232	0.825456	1.07968		10350742	13983371	0.656458	0.86672	0.757405		8436646	10611129	0.882747	0.950618	0.928603		7009839	5965339	0.658164	0.376277
		2.808	6241831	4233508	0.826819	0.762687	1.08409		10601645	10161085	0.993919	0.986302	1.00772		13182733	12646700	0.992725	0.967842	1.02571		9961525	12541067	1	0.998132	1.00187			7267412	9641500	0.882081	0.823029	1.07175		10280118	13977051	0.651492	0.866283	0.752055		8315729	10457187	0.867583	0.934245	0.928646		6993152	5921763	0.655711	0.369602
		2.88	6138559	4221309	0.810163	0.759835	1.06623		10404088	10153721	0.970983	0.985296	0.985473		13224695	12676797	0.996166	0.970515	1.02643		9833617	12487853	0.985605	0.99319	0.992362			7295818	9649484	0.885988	0.823814	1.07547		10137412	13798765	0.641458	0.853965	0.751153		8375133	10484867	0.875032	0.937189	0.933678		6944618	5903882	0.648577	0.366862
		2.952	6588545	4534727	0.882738	0.833092	1.05959		10430212	10074242	0.974016	0.97444	0.999565		13250373	12746717	0.998272	0.976727	1.02206		9789379	12441303	0.980626	0.988867	0.991666			7233333	9598098	0.877394	0.81876	1.07161		10040106	13686106	0.634616	0.846181	0.749977		8287046	10369546	0.863986	0.924924	0.934115		6911545	5903955	0.643715	0.366874
		3.024	6415667	4401028	0.854855	0.801842	1.06611		10358708	10021194	0.965714	0.967194	0.99847		13271452	12811232	1	0.982458	1.01786		9675139	12463139	0.967769	0.990895	0.976661			7221551	9590333	0.875774	0.817997	1.07063		9886708	13584848	0.62383	0.839185	0.743376		8344444	10523458	0.871184	0.941293	0.925518		6845597	5874722	0.63402	0.362395
		3.096	6768623	4635565	0.911781	0.856662	1.06434		10367044	10038565	0.966682	0.969567	0.997025		13264485	12810600	0.999429	0.982402	1.01733		9687884	12437652	0.969203	0.988528	0.980451			7223588	9589471	0.876054	0.817912	1.07109		9779580	13609058	0.616298	0.840858	0.732939		8224682	10442739	0.856165	0.932709	0.917934		6801478	5838145	0.627535	0.356792
		3.168	6769000	4627206	0.911842	0.854708	1.06685		10339383	10068691	0.96347	0.973682	0.989513		13245464	12815638	0.997869	0.982849	1.01528		9721367	12445235	0.972972	0.989232	0.983562			7148894	9496467	0.865781	0.808766	1.0705		9687750	13556191	0.609841	0.837205	0.728425		8212912	10448412	0.854689	0.933312	0.915759		6762809	5823206	0.62185	0.354504
		3.24	6866667	4688813	0.927594	0.869108	1.06729		10172213	10048054	0.944062	0.970863	0.972395		13227299	12832013	0.996379	0.984304	1.01227		9641547	12454533	0.963988	0.990096	0.973631			7181556	9524652	0.870273	0.811538	1.07238		9591507	13508934	0.603074	0.83394	0.723162		8188067	10423200	0.851573	0.93063	0.915049		6735626	5780560	0.617854	0.347971
		3.312	7020139	4848111	0.952347	0.906342	1.05076		10199125	10014375	0.947186	0.966262	0.980258		13261223	12894348	0.999161	0.989841	1.00942		9684473	12539625	0.968819	0.997998	0.970763			7077808	9406230	0.856005	0.799892	1.07015		9610000	13617111	0.604374	0.841414	0.718284		8012861	10319917	0.829601	0.919646	0.902087		6717250	5743236	0.615153	0.342253
		3.384	6760000	4705500	0.910391	0.873008	1.04282		10091013	10007372	0.934634	0.965306	0.968226		13171329	12924278	0.99179	0.9925	0.999284		9542808	12561180	0.952876	1	0.952876			7102224	9462500	0.859363	0.805425	1.06697		9550064	13500552	0.60016	0.833361	0.720168		7893064	10181448	0.814577	0.904919	0.900166		6680077	5748769	0.609688	0.3431
		3.456	6974460	4884303	0.944979	0.914801	1.03299		10220974	10043658	0.949723	0.970262	0.978831		13142740	12932377	0.989446	0.993219	0.9962		9565289	12438882	0.955406	0.988642	0.966382			7070440	9400821	0.854991	0.79936	1.0696		9581461	13617461	0.602367	0.841438	0.715878		7617158	9809789	0.779976	0.865391	0.901299		6640355	5707553	0.603849	0.336787
		3.528	7064119	4949774	0.95944	0.930104	1.03154		10218119	10081273	0.949391	0.9754	0.973335		13084835	12930835	0.984697	0.993083	0.991556		9536988	12386952	0.952221	0.98382	0.967882			6968444	9292457	0.840964	0.788703	1.06626		9525369	13534904	0.598423	0.835734	0.716045		7387357	9514881	0.751157	0.834026	0.90064		6578560	5665107	0.594765	0.330284
		3.6	7049358	4936037	0.957059	0.926893	1.03255		10156889	10162370	0.942283	0.986477	0.9552		13084280	12939500	0.984652	0.993852	0.990743		9505654	12209210	0.948694	0.967313	0.980752			7029346	9393667	0.84934	0.798656	1.06346		9413457	13446704	0.590554	0.82964	0.71182		7236852	9212556	0.732283	0.801872	0.913217		6544407	5670975	0.589745	0.331183
		3.672	7315603	5142308	1	0.975106	1.02553		10253475	10174552	0.953496	0.988141	0.964939		13048722	12938393	0.981736	0.993754	0.987907		9680154	12262730	0.968333	0.972283	0.995937			6854884	9215825	0.825345	0.781167	1.05655		9316270	13516308	0.583721	0.834449	0.699528		7141872	9000205	0.720372	0.779287	0.924398		6530859	5649718	0.587753	0.327927
		3.744	6927244	4913558	0.937364	0.921639	1.01706		10085244	10261372	0.933964	1	0.933964		12986931	12978575	0.976669	0.997323	0.97929		9523768	12237465	0.950733	0.969937	0.980201			6855247	9241926	0.825395	0.783734	1.05316		9165559	13331047	0.573124	0.821649	0.697528		7000593	8674035	0.702654	0.744597	0.94367		6498163	5637523	0.582947	0.326059
		3.816	7219605	5169716	0.984517	0.981513	1.00306		10062877	10217271	0.931368	0.993976	0.937012		12900598	12953122	0.96959	0.995062	0.974401		9504667	12188346	0.948583	0.965375	0.982606			6806096	9183341	0.818635	0.777972	1.05227		9072309	13450259	0.566567	0.829886	0.682705		7011444	8576481	0.704015	0.734222	0.958858		6454876	5569876	0.576583	0.315696
		3.888	7120925	5134627	0.968602	0.973311	0.995162		9864245	10150830	0.908306	0.984901	0.922231		12918905	13008705	0.971091	1	0.971091		9449170	12186234	0.942337	0.965179	0.976334			6789802	9171512	0.816394	0.776809	1.05096		8976489	13386659	0.55983	0.825492	0.678177		6826798	8336202	0.680859	0.708667	0.96076		6451276	5591404	0.576054	0.318994
		3.96	7206000	5196349	0.982323	0.987738	0.994518		9773732	10091813	0.897797	0.97684	0.919084		12807713	12966701	0.961973	0.996269	0.965576		9448059	12083197	0.942212	0.95561	0.98598			6823878	9227322	0.821081	0.782297	1.04958		8877941	13332896	0.5529	0.821777	0.672811		6717582	8212163	0.667162	0.695475	0.95929		6410744	5558582	0.570096	0.313966
		4.032	7254755	5248811	0.990186	1	0.990186		9772667	9957955	0.897674	0.958556	0.936486		12695308	12939429	0.952756	0.993846	0.958656		9581600	12131800	0.957242	0.960124	0.996998			6704099	9115374	0.804608	0.771288	1.0432		8827711	13337744	0.549368	0.822112	0.66824		6617645	8163667	0.654629	0.690317	0.948303		6389556	5538511	0.566981	0.310891
		4.104	7088396	5097220	0.963355	0.964568	0.998743		9618594	9883154	0.879786	0.948339	0.927712		12619271	12950598	0.946521	0.994838	0.951432		9476879	12145253	0.945456	0.961373	0.983443			6694815	9116794	0.803331	0.771428	1.04136		8738132	13179978	0.54307	0.811212	0.669455		6520802	8052088	0.642484	0.67845	0.946989		6366835	5530824	0.563641	0.309713
		4.176	7194652	5135022	0.980493	0.973403	1.00728		9597055	9710479	0.877285	0.924753	0.94867		12484387	12856150	0.93546	0.986448	0.948312		9453195	12012218	0.94279	0.949019	0.993437			6640510	9034704	0.795862	0.763355	1.04258		8750229	13204511	0.54392	0.812907	0.669106		6538130	8018772	0.644657	0.674906	0.95518		6344609	5526380	0.560374	0.309032
		4.248	6989265	4973429	0.947367	0.935633	1.01254		9593490	9688316	0.876871	0.921726	0.951336		12393858	12880121	0.928037	0.988577	0.93876		9441826	12056266	0.941511	0.953109	0.987831			6702577	9123649	0.804398	0.772102	1.04183		8698082	13121337	0.540254	0.80716	0.669327		6399806	7832479	0.62731	0.655093	0.95759		6333031	5528531	0.558672	0.309362
		4.32	7027526	5009495	0.953538	0.944063	1.01004		9677711	9667196	0.886649	0.918841	0.964965		12241571	12793133	0.915549	0.98085	0.933425		9533547	12014505	0.951834	0.949231	1.00274			6638837	9059163	0.795632	0.76576	1.03901		8709299	13133392	0.541042	0.807993	0.669613		6452227	7847835	0.633884	0.656726	0.965219		6303258	5504248	0.554295	0.305642
		4.392	6869337	4900204	0.928025	0.918518	1.01035		9495694	9663500	0.865517	0.918336	0.942484		12194131	12801970	0.911659	0.981635	0.928715		9495571	12035837	0.94756	0.951212	0.99616			6633790	9028360	0.794938	0.762731	1.04223		8616010	12999143	0.534483	0.798717	0.669177		6325214	7722347	0.617956	0.64338	0.960484		6314521	5508571	0.555951	0.306304
		4.464	6769080	4828210	0.911855	0.90169	1.01127		9343190	9531670	0.847811	0.900329	0.941668		12075099	12777178	0.901899	0.979433	0.920838		9505890	11997580	0.948721	0.947659	1.00112			6650763	9027804	0.797272	0.762676	1.04536		8477050	12962790	0.524712	0.796206	0.659016		6321220	7698180	0.617455	0.64081	0.963555		6320450	5522490	0.556822	0.308437
		4.536	6778186	4887371	0.913324	0.915518	0.997603		9371577	9492351	0.851107	0.894959	0.951001		11913316	12700286	0.888632	0.972602	0.913665		9555392	11982567	0.954292	0.946265	1.00848			6578843	8929463	0.787381	0.753005	1.04565		8382319	12877412	0.518051	0.790307	0.655507		6333320	7607454	0.618973	0.63116	0.98069		6311041	5519145	0.555439	0.307924
		4.608	6510509	4682481	0.870152	0.867628	1.00291		9294064	9495769	0.842107	0.895425	0.940455		11857605	12698156	0.884064	0.972413	0.909145		9549389	12124750	0.953617	0.959469	0.9939			6566920	8927630	0.785741	0.752825	1.04372		8251426	12716796	0.508848	0.779209	0.653031		6245343	7485704	0.60794	0.618212	0.983384		6294472	5519546	0.553003	0.307986
		4.68	6580300	4753140	0.881408	0.884144	0.996906		9265260	9475650	0.838763	0.892677	0.939604		11643445	12623742	0.866503	0.965802	0.897185		9566300	12035110	0.95552	0.951144	1.0046			6512151	8877151	0.778208	0.747861	1.04058		8156460	12555610	0.50217	0.768073	0.653806		6186790	7433400	0.600596	0.612649	0.980327		6248180	5469770	0.546198	0.30036
		4.752	6387755	4606453	0.850354	0.849857	1.00058		9198227	9482085	0.83098	0.893556	0.92997		11602916	12616720	0.86318	0.965178	0.894321		9588312	12120123	0.957997	0.95904	0.998913			6517345	8879655	0.778923	0.748107	1.04119		8062528	12494934	0.495566	0.76388	0.648748		6108424	7371812	0.590769	0.606099	0.974707		6223142	5474708	0.542518	0.301117
		4.824	6350620	4584026	0.844365	0.844615	0.999703		9245566	9473885	0.836477	0.892436	0.937295		11449965	12562114	0.850638	0.960328	0.885779		9624398	12109168	0.962058	0.958022	1.00421			6481952	8856000	0.774055	0.745781	1.03791		8055026	12435442	0.495038	0.75977	0.651563		6057549	7304407	0.584389	0.59893	0.975721		6230195	5505637	0.543554	0.305855
		4.896	6278817	4607664	0.832784	0.85014	0.979584		9305337	9483173	0.843416	0.893705	0.94373		11305048	12517838	0.838754	0.956394	0.876996		9608029	12063452	0.960216	0.953777	1.00675			6390589	8789196	0.76149	0.739211	1.03014		7943692	12191490	0.48721	0.742915	0.655808		6047231	7342904	0.583095	0.603024	0.966951		6164336	5469789	0.533873	0.300363
		4.968	6071554	4496027	0.799356	0.824047	0.970037		9226429	9495384	0.834255	0.895373	0.93174		11274619	12532575	0.836259	0.957704	0.873192		9595974	12159089	0.958859	0.962658	0.996054			6414009	8811532	0.764711	0.741407	1.03143		7844866	12042526	0.480261	0.732623	0.655537		6007268	7366071	0.578083	0.605488	0.954739		6135723	5472232	0.529667	0.300737
		5.04	6081009	4559860	0.800881	0.838967	0.954604		9266523	9506262	0.83891	0.896859	0.935387		11055102	12427037	0.818259	0.948328	0.862843		9566673	12017374	0.955562	0.949497	1.00639			6299508	8673134	0.748963	0.727797	1.02908		7685991	11768607	0.46909	0.713697	0.657268		5968664	7260364	0.573242	0.594246	0.964655		6094168	5454607	0.523558	0.298037
		5.112	5922167	4483408	0.775262	0.821097	0.944178		9061809	9409825	0.815142	0.883686	0.922434		11030008	12410578	0.816201	0.946866	0.862003		9531875	12064083	0.951645	0.953835	0.997704			6338302	8766725	0.754299	0.737001	1.02347		7522708	11543850	0.457609	0.698168	0.655442		5895708	7146375	0.564092	0.582122	0.969028		6099733	5482717	0.524376	0.302344
		5.184	5950405	4507112	0.779817	0.826638	0.943359		9250534	9490896	0.837053	0.89476	0.935506		10900923	12372709	0.805616	0.943502	0.853857		9584354	12067698	0.957552	0.954171	1.00354			6273828	8710500	0.745431	0.731472	1.01908		7419689	11370966	0.450365	0.686223	0.656296		5884578	7046724	0.562697	0.571524	0.984555		6069612	5436198	0.519948	0.295217
		5.256	5954035	4479164	0.780402	0.820105	0.951588		9176112	9466681	0.828413	0.891452	0.929284		10825761	12364316	0.799453	0.942756	0.847995		9574845	12058759	0.956481	0.953341	1.00329			6237655	8701387	0.740456	0.730576	1.01352		7239664	11097500	0.437707	0.667329	0.655909		5848552	6957689	0.558179	0.562054	0.993104		6104629	5451396	0.525096	0.297546
		5.328	5956966	4462908	0.780875	0.816306	0.956596		9173781	9497949	0.828142	0.895723	0.924551		10703684	12333667	0.789442	0.940034	0.839802		9593613	12104756	0.958594	0.957612	1.00102			6225325	8644259	0.738761	0.724957	1.01904		7170361	10957429	0.432834	0.657651	0.658152		5813765	6842395	0.553816	0.549792	1.00732		6146437	5485345	0.531242	0.302746
		5.4	5969083	4466933	0.782829	0.817246	0.957886		9063509	9395875	0.815339	0.881781	0.924651		10519008	12273174	0.774299	0.93466	0.828428		9521842	11998033	0.950516	0.947701	1.00297			6142452	8522604	0.727363	0.712994	1.02015		6998842	10748566	0.420774	0.64322	0.654168		5733975	6673383	0.54381	0.531817	1.02255		6148892	5495600	0.531603	0.304317
		5.472	5870718	4341613	0.766964	0.787955	0.973361		8887032	9351314	0.79485	0.875694	0.90768		10552048	12337544	0.777008	0.940378	0.826272		9502983	12071581	0.948394	0.954532	0.99357			6191437	8597202	0.7341	0.72033	1.01912		6917314	10540911	0.415042	0.628873	0.659977		5649847	6612218	0.533259	0.525312	1.01513		6166371	5494331	0.534172	0.304123
		5.544	5994597	4418950	0.786944	0.806031	0.97632		9079983	9418580	0.817252	0.884882	0.923572		10344467	12251325	0.759986	0.932719	0.814807		9466479	11973244	0.944286	0.945399	0.998822			6113459	8484557	0.723375	0.709252	1.01991		6897050	10524319	0.413617	0.627727	0.658912		5490008	6419261	0.513214	0.50479	1.01669		6163361	5509345	0.53373	0.306423
		5.616	5878984	4301589	0.768298	0.7786	0.986769		8862879	9361354	0.792046	0.877066	0.903064		10357984	12268376	0.761095	0.934234	0.814673		9471161	12028669	0.944812	0.950546	0.993968			6118969	8517800	0.724133	0.712521	1.0163		6805427	10337267	0.407174	0.614803	0.662284		5449468	6435718	0.50813	0.50654	1.00314		6181105	5539307	0.536338	0.311013
		5.688	5860984	4332177	0.765394	0.785749	0.974095		8959954	9411131	0.803317	0.883865	0.908868		10196756	12178580	0.747874	0.926257	0.807415		9440308	11938569	0.94134	0.942179	0.99911			6097760	8513800	0.721216	0.712128	1.01276		6777431	10318000	0.405206	0.613472	0.660513		5327531	6324692	0.492838	0.494732	0.996173		6227977	5583723	0.543228	0.317817
		5.76	5793336	4345360	0.754484	0.78883	0.956459		8950064	9458192	0.802168	0.890293	0.901016		10084873	12116952	0.7387	0.920782	0.802252		9376440	11833736	0.934152	0.932443	1.00183			6035022	8441687	0.712588	0.705036	1.01071		6701464	10233632	0.399864	0.607643	0.658059		5194000	6247304	0.476093	0.486501	0.978605		6203296	5536296	0.5396	0.310551
		5.832	5679604	4264157	0.736141	0.76985	0.956213		8813844	9447097	0.786353	0.888777	0.884758		10113741	12124978	0.741067	0.921495	0.8042		9492836	11976112	0.947252	0.945665	1.00168			6039722	8489023	0.713234	0.709691	1.00499		6724336	10222799	0.401473	0.606894	0.66152		5163120	6298604	0.47222	0.491957	0.95988		6222567	5558657	0.542433	0.313977
		5.904	5738325	4343675	0.745612	0.788437	0.945684		8990635	9536977	0.806879	0.901054	0.895483		9905992	12031299	0.724031	0.913173	0.792874		9395262	11805198	0.93627	0.929793	1.00697			5939194	8366135	0.699408	0.697606	1.00258		6678587	10228896	0.398256	0.607315	0.655765		5106000	6226476	0.465057	0.484286	0.960294		6237135	5586897	0.544575	0.318303
		5.976	5583634	4248985	0.720663	0.766304	0.940439		8687627	9382388	0.771699	0.879939	0.876992		9911630	12034622	0.724494	0.913468	0.793124		9394000	11880440	0.936128	0.93678	0.999304			5911044	8368773	0.695537	0.697865	0.996663		6573142	10078701	0.390842	0.596938	0.654744		5161216	6299836	0.471981	0.492088	0.95914		6255463	5649903	0.547269	0.327955
		6.048	5573613	4250795	0.719046	0.766727	0.937813		8720460	9394935	0.775511	0.881652	0.879611		9732239	11968602	0.709784	0.907604	0.782041		9262132	11746811	0.921287	0.92437	0.996665			5939647	8420412	0.699471	0.702944	0.995059		6508767	10033773	0.386315	0.593834	0.650544		5174577	6236803	0.473657	0.485384	0.975839		6247482	5632876	0.546096	0.325347
		6.12	5575485	4272147	0.719348	0.771718	0.932139		8822008	9472412	0.787301	0.892235	0.882392		9587905	11896555	0.697948	0.901203	0.774462		9232750	11746258	0.917981	0.924319	0.993143			5844725	8274746	0.686416	0.688619	0.996801		6484449	10092684	0.384605	0.597904	0.643256		5243522	6256360	0.482303	0.487464	0.989412		6339493	5712897	0.559622	0.337605
		6.192	5453312	4179558	0.699644	0.750076	0.932763		8481964	9300362	0.747821	0.868735	0.860817		9585316	11927899	0.697736	0.903988	0.771842		9182108	11800623	0.912281	0.929368	0.981615			5893000	8406680	0.693055	0.701593	0.98783		6408819	9961210	0.379288	0.58882	0.644148		5255406	6290543	0.483793	0.4911	0.985122		6331304	5699253	0.558418	0.335515
		6.264	5461389	4201298	0.700947	0.755158	0.928212		8750358	9432306	0.778982	0.886757	0.878462		9397522	11836280	0.682337	0.895849	0.761665		9086344	11572610	0.901504	0.908193	0.992635			5778967	8267033	0.677372	0.68786	0.984753		6293412	9940848	0.371173	0.587414	0.631877		5161008	6199221	0.471955	0.481387	0.980406		6418847	5747374	0.571287	0.342887
		6.336	5369033	4102640	0.686051	0.732098	0.937103		8391080	9248127	0.737269	0.8616	0.855698		9400795	11842397	0.682605	0.896392	0.761503		9018720	11624747	0.893893	0.913035	0.979035			5790022	8312797	0.678892	0.692361	0.980547		6159894	9720380	0.361785	0.572181	0.632291		5127007	6170533	0.467691	0.478336	0.977746		6417533	5785740	0.571094	0.348764
		6.408	5378609	4099993	0.687596	0.731479	0.940007		8458188	9319985	0.745061	0.871415	0.855001		9294165	11793906	0.673861	0.892085	0.755378		8974790	11537333	0.888949	0.904917	0.982355			5774806	8309993	0.6768	0.692085	0.977914		6132413	9733326	0.359852	0.573076	0.627932		5101457	6130174	0.464487	0.474044	0.97984		6506341	5835268	0.584149	0.356351
		6.48	5328472	4067312	0.679509	0.72384	0.938756		8416688	9325910	0.740243	0.872224	0.848684		9222014	11763606	0.667945	0.889393	0.751012		8928285	11544521	0.883715	0.905584	0.975851			5748207	8294151	0.673141	0.690527	0.974823		6078792	9645152	0.356082	0.566983	0.628029		5109653	6132597	0.465515	0.474301	0.981475		6632868	5888368	0.602749	0.364486
		6.552	5274352	4052186	0.670781	0.720305	0.931245		8405772	9346572	0.738975	0.875047	0.844498		9144788	11734809	0.661612	0.886835	0.746038		8890021	11546779	0.879409	0.905794	0.970871			5762599	8322245	0.675121	0.69329	0.973793		6010441	9539041	0.351276	0.559652	0.627669		5159669	6207786	0.471787	0.482298	0.978207		6768414	5991724	0.622674	0.380319
		6.624	5200204	4046116	0.658822	0.718886	0.916448		8474490	9405449	0.746953	0.883089	0.845842		9009738	11667993	0.650538	0.880899	0.738493		8800986	11426218	0.869388	0.894597	0.971821			5702364	8246391	0.666837	0.68583	0.972306		5878462	9371728	0.341996	0.548092	0.623976		5105701	6135490	0.465019	0.474609	0.979794		6876660	6076680	0.638587	0.393333
		6.696	5132689	3987503	0.647933	0.705186	0.918811		8333258	9364192	0.730556	0.877453	0.832587		9057530	11678384	0.654457	0.881822	0.742164		8780053	11527649	0.867032	0.904017	0.959088			5712973	8290014	0.668296	0.69012	0.968376		5879636	9330126	0.342079	0.545218	0.627417		5066238	6122510	0.46007	0.473229	0.972194		6887781	6142212	0.640221	0.403372
		6.768	5113531	3999290	0.644843	0.707941	0.910871		8325448	9377104	0.729649	0.879217	0.829886		8926884	11663925	0.643744	0.880538	0.731081		8730635	11400379	0.861471	0.892198	0.96556			5703606	8264720	0.667007	0.687633	0.970005		5780296	9324849	0.335094	0.544853	0.615017		5019848	6076876	0.454253	0.468375	0.969848		7000269	6203435	0.656757	0.412751
		6.84	5043840	3948420	0.633603	0.696051	0.910282		8227467	9368940	0.718274	0.878102	0.817984		8873119	11621900	0.639335	0.876805	0.729165		8714627	11414400	0.859669	0.8935	0.962137			5690956	8273956	0.665268	0.688541	0.966199		5735980	9232480	0.331978	0.538471	0.616519		4982106	6035660	0.449519	0.463992	0.968809		7151013	6311387	0.678917	0.429288
		6.912	5035614	3959918	0.632276	0.698739	0.904882		8152778	9301620	0.709602	0.868906	0.816661		8810704	11582623	0.634217	0.873316	0.726218		8707931	11348835	0.858915	0.887411	0.967889			5730151	8338368	0.670658	0.694875	0.965149		5625874	9098506	0.324236	0.529215	0.612674		4931203	6025399	0.443136	0.4629	0.957303		7220816	6367607	0.689178	0.437901
		6.984	4985592	3916638	0.624209	0.688622	0.90646		8115756	9270618	0.705304	0.864672	0.81569		8708032	11517667	0.625798	0.867545	0.721344		8676954	11253750	0.855429	0.87858	0.973649			5685900	8291305	0.664572	0.690247	0.962803		5543454	9112704	0.318441	0.530196	0.60061		4805724	5923658	0.4274	0.45208	0.945408		7315520	6460697	0.7031	0.452161
		7.056	4942721	3893428	0.617294	0.683197	0.903537		7968112	9177360	0.688162	0.851934	0.807765		8732963	11494340	0.627843	0.865473	0.725433		8672124	11351969	0.854886	0.887702	0.963032			5715803	8369270	0.668685	0.697914	0.958119		5475957	9040646	0.313695	0.525217	0.597267		4777000	5911211	0.423797	0.450756	0.940193		7401224	6602385	0.715699	0.473867
		7.128	4926480	3938480	0.614675	0.693728	0.886046		8033256	9171737	0.695725	0.851166	0.81738		8652111	11491313	0.621213	0.865204	0.717996		8632868	11244072	0.850468	0.877682	0.968993			5665657	8293650	0.661788	0.690478	0.95845		5439678	9102875	0.311144	0.529516	0.5876		4707454	5834737	0.415076	0.442622	0.937765		7439033	6663895	0.721257	0.483289
		7.2	4812711	3918223	0.596326	0.688993	0.865503		7876187	9070012	0.677489	0.837271	0.809164		8625072	11491473	0.618996	0.865218	0.715421		8574603	11291608	0.84391	0.882096	0.95671			5690627	8343479	0.665222	0.695378	0.956634		5389060	9009000	0.307585	0.52303	0.588082		4742464	5850223	0.419466	0.444269	0.944171		7457771	6698416	0.724011	0.488578
		7.272	4790124	3926621	0.592683	0.690956	0.857772		7945236	9126261	0.685506	0.844954	0.811294		8553396	11529407	0.613118	0.868588	0.705879		8503074	11164279	0.83586	0.870271	0.960459			5677263	8374686	0.663384	0.698447	0.949799		5374167	9009677	0.306538	0.523077	0.586027		4811808	5895447	0.428163	0.449079	0.953423		7595050	6826031	0.744192	0.508127
		7.344	4758558	3916987	0.587592	0.688704	0.853185		7886026	9064218	0.678632	0.83648	0.811295		8497949	11565058	0.608571	0.871755	0.698099		8388397	11106385	0.822954	0.864895	0.951507			5671643	8409654	0.662611	0.701886	0.944044		5413391	9048962	0.309296	0.525791	0.588247		4806000	5825872	0.427434	0.441679	0.967747		7591519	6858385	0.743673	0.513084
		7.416	4797054	3958018	0.593801	0.698294	0.850358		7835887	9026208	0.672811	0.831288	0.80936		8440775	11592538	0.603883	0.874196	0.690787		8291869	11085768	0.81209	0.86298	0.94103			5705963	8486187	0.667331	0.709412	0.940682		5428339	9129952	0.310347	0.531387	0.584031		4828345	5805530	0.430236	0.439516	0.978887		7686423	6984286	0.757624	0.53237
		7.488	4791261	3935503	0.592866	0.693032	0.855467		7817895	8970913	0.670722	0.823735	0.814245		8312494	11568550	0.593364	0.872066	0.680412		8208820	10950510	0.802743	0.850419	0.943939			5668856	8408747	0.662228	0.701797	0.943618		5432298	9234789	0.310625	0.538631	0.576694		4776435	5796733	0.423727	0.43858	0.966132		7710944	6999888	0.761229	0.534761
		7.56	4790402	3965621	0.592728	0.700072	0.846667		7676598	8879988	0.654317	0.811315	0.806489		8251274	11535046	0.588344	0.869089	0.676966		8145500	11017063	0.795617	0.8566	0.928809			5714964	8501000	0.668569	0.710869	0.940496		5400712	9181552	0.308404	0.534952	0.576507		4785862	5809465	0.424909	0.439935	0.965845		7875040	7164626	0.785351	0.559997
		7.632	4810446	3930310	0.59596	0.691818	0.861441		7750875	8919958	0.662941	0.816775	0.811656		8170089	11493160	0.581687	0.865368	0.672184		8082125	10887619	0.788485	0.844578	0.933584			5698934	8496916	0.666365	0.710467	0.937925		5428679	9193137	0.31037	0.535753	0.579317		4698845	5722280	0.413996	0.430662	0.961302		7891679	7203827	0.787797	0.566002
		7.704	4797590	3940602	0.593887	0.694224	0.855469		7602066	8810620	0.645664	0.80184	0.805227		8127312	11437778	0.578179	0.860449	0.671951		8017524	10886434	0.781214	0.844468	0.925096			5702579	8520865	0.666866	0.712823	0.935529		5456699	9122464	0.312341	0.53087	0.588356		4647771	5625199	0.407591	0.420337	0.969677		7863096	7185735	0.783595	0.563231
		7.776	4829064	3944690	0.598963	0.695179	0.861595		7583409	8818638	0.643498	0.802935	0.801431		8066954	11365110	0.57323	0.853993	0.671235		7970877	10847146	0.775964	0.84082	0.922867			5714448	8546604	0.668498	0.715354	0.934501		5441210	9094088	0.311252	0.528909	0.588478		4594631	5571538	0.400927	0.41463	0.966952		7964246	7313760	0.798465	0.582843
		7.848	4780227	3912802	0.591087	0.687726	0.85948		7522721	8757884	0.636452	0.794637	0.800934		7978670	11334937	0.56599	0.851313	0.664844		7881506	10714523	0.765906	0.828503	0.924446			5732706	8577483	0.67101	0.71839	0.934046		5371291	8986291	0.306335	0.521461	0.587455		4573268	5570762	0.398248	0.414547	0.960681		8053104	7411704	0.811527	0.597847
		7.92	4780167	3998855	0.591077	0.70784	0.835044		7479783	8673223	0.631466	0.783073	0.806395		7918862	11261686	0.561086	0.844806	0.66416		7900322	10800967	0.768024	0.836531	0.918106			5761286	8671383	0.67494	0.727625	0.927594		5380089	9056328	0.306954	0.5263	0.58323		4488467	5427111	0.387613	0.399269	0.970806		8065483	7550056	0.813347	0.619041
		7.992	4733634	3977743	0.583572	0.702905	0.830229		7494166	8684463	0.633136	0.784608	0.806946		7810631	11177613	0.552211	0.837337	0.659485		7785354	10657480	0.755085	0.823206	0.917249			5754725	8685202	0.674038	0.728984	0.924627		5324971	8982754	0.303078	0.521217	0.581482		4446949	5376806	0.382406	0.393919	0.970774		8130446	7587600	0.822897	0.624793
		8.064	4776904	4005073	0.590551	0.709293	0.832591		7431444	8582506	0.625854	0.770682	0.812078		7710224	11101234	0.543978	0.830552	0.654959		7758798	10680551	0.752096	0.825348	0.911247			5784247	8743517	0.678098	0.734719	0.922936		5338596	9052169	0.304036	0.526013	0.578002		4407540	5326933	0.377464	0.388615	0.971307		8140612	7643376	0.824391	0.633337
		8.136	4782914	3963909	0.59152	0.699671	0.845425		7380360	8531279	0.619923	0.763685	0.811753		7598000	11007086	0.534775	0.822189	0.650429		7661425	10544764	0.741137	0.812738	0.911902			5797117	8777889	0.679868	0.738099	0.921107		5299500	8986624	0.301287	0.521484	0.57775		4438403	5363742	0.381335	0.392529	0.97148		8235070	7749134	0.838277	0.649538
		8.208	4838489	3972645	0.600483	0.701713	0.855739		7350433	8473578	0.616449	0.755803	0.81562		7510928	10904144	0.527635	0.813044	0.648963		7614533	10470312	0.73586	0.805823	0.913178			5841380	8855363	0.685956	0.745718	0.91986		5250083	8861938	0.297813	0.51287	0.580679		4402755	5318439	0.376864	0.387711	0.972023		8254861	7734322	0.841186	0.647269
		8.28	4890972	3986419	0.608948	0.704933	0.863838		7293235	8437017	0.609808	0.750809	0.812201		7433145	10831772	0.521257	0.806615	0.646228		7600430	10534106	0.734273	0.811748	0.904558			5926402	8978690	0.697649	0.757846	0.920568		5193508	8773899	0.293835	0.506787	0.5798		4342799	5263570	0.369345	0.381876	0.967187		8251179	7805665	0.840645	0.658198
		8.352	4879207	3959076	0.60705	0.698542	0.869025		7308489	8460538	0.611579	0.754022	0.811089		7333654	10751151	0.513099	0.799453	0.641813		7515212	10388119	0.724682	0.79819	0.907906			5919138	8964591	0.69665	0.75646	0.920935		5065973	8490701	0.284867	0.48722	0.584679		4394679	5344962	0.375851	0.390532	0.962408		8283511	7905821	0.845398	0.673541
		8.424	4883245	3933309	0.607702	0.692519	0.877523		7187373	8361654	0.597517	0.740516	0.806893		7257296	10676328	0.506838	0.792806	0.639296		7482755	10423372	0.721029	0.801464	0.89964			5999185	9075910	0.707659	0.767407	0.922143		4976234	8370984	0.278557	0.478949	0.581602		4372165	5313553	0.373028	0.387192	0.963419		8372724	8036888	0.858512	0.69362
		8.496	4863989	3907354	0.604596	0.686452	0.880754		7192402	8334619	0.598101	0.736823	0.81173		7129748	10580421	0.496379	0.784286	0.632905		7424698	10363672	0.714495	0.79592	0.897697			6020388	9116574	0.710575	0.771406	0.921143		4882032	8091063	0.271934	0.459608	0.591664		4426831	5382730	0.379883	0.394549	0.96283		8324096	8081810	0.851364	0.700501
		8.568	4857064	3873931	0.603479	0.67864	0.889247		7132681	8314830	0.591167	0.73412	0.805274		7041312	10497111	0.489127	0.776885	0.6296		7427059	10364335	0.714761	0.795982	0.897962			6082065	9229027	0.719058	0.782465	0.918965		4820782	7972830	0.267627	0.451439	0.592831		4403873	5376532	0.377004	0.39389	0.957131		8320452	8074904	0.850828	0.699443
		8.64	4796174	3819685	0.593659	0.665961	0.891432		7117141	8303119	0.589363	0.73252	0.804569		6932486	10385395	0.480203	0.766961	0.626111		7432484	10375956	0.715371	0.797061	0.897512			6147896	9331119	0.728112	0.792505	0.918747		4757500	7842734	0.263177	0.442451	0.594818		4429375	5369304	0.380202	0.393121	0.967138		8208065	8053310	0.834307	0.696135
		8.712	4692264	3719648	0.5769	0.642579	0.897788		7094523	8252062	0.586737	0.725546	0.808683		6834825	10261423	0.472195	0.755948	0.624639		7387021	10277088	0.710255	0.787879	0.901477			6168350	9415121	0.730925	0.800766	0.912782		4650803	7643270	0.255675	0.428669	0.596439		4431238	5359901	0.380436	0.392121	0.970201		8184845	8058523	0.830893	0.696934
		8.784	4703927	3715714	0.578781	0.641659	0.902006		7032597	8230437	0.579547	0.722592	0.802039		6787285	10189913	0.468297	0.749596	0.624732		7407777	10392175	0.712591	0.798567	0.892337			6242026	9580394	0.741058	0.817019	0.907026		4570704	7551359	0.250043	0.422319	0.592072		4279811	5196340	0.361446	0.374725	0.964562		8356771	8267345	0.856167	0.728924
		8.856	4605537	3647037	0.562912	0.625607	0.899786		6932862	8135261	0.567968	0.709592	0.800415		6645471	10030571	0.456668	0.735441	0.620944		7317186	10316463	0.702395	0.791536	0.887383			6268599	9669302	0.744712	0.825763	0.901848		4520383	7449877	0.246505	0.415307	0.593548		4225335	5148787	0.354614	0.369668	0.959278		8272591	8186123	0.843792	0.716481
		8.928	4638931	3675317	0.568298	0.632217	0.898897		6850936	8066584	0.558456	0.700212	0.797554		6586621	9989404	0.451842	0.731784	0.617453		7296847	10374322	0.700106	0.796909	0.878527			6344471	9823460	0.755147	0.840923	0.897998		4442238	7387951	0.24101	0.411029	0.586359		4084203	4983386	0.336915	0.352077	0.956937		8439064	8373406	0.868264	0.745171
		9	4506629	3635016	0.54696	0.622797	0.878231		6770392	8009434	0.549105	0.692405	0.79304		6433447	9858505	0.439282	0.720156	0.609982		7219063	10285624	0.691352	0.788672	0.876603			6397990	9928230	0.762508	0.851226	0.895775		4342884	7274857	0.234024	0.403215	0.580396		4048349	4977651	0.332419	0.351467	0.945805		8376402	8287471	0.859053	0.732007
		9.072	4494667	3690265	0.545031	0.635711	0.857356		6656024	7878485	0.535827	0.674519	0.794383		6388268	9819780	0.435577	0.716716	0.60774		7142000	10212412	0.682679	0.781873	0.873134			6473005	10068626	0.772825	0.865033	0.893404		4222270	7157270	0.225544	0.395091	0.570865		3954270	4873338	0.32062	0.340372	0.94197		8513878	8437338	0.879262	0.754965
		9.144	4457383	3651286	0.539017	0.6266	0.860226		6639685	7854208	0.53393	0.671203	0.795482		6317208	9702903	0.42975	0.706333	0.608424		7180980	10310315	0.687066	0.790965	0.868643			6577299	10272802	0.787168	0.885112	0.889343		4176908	7143150	0.222354	0.394115	0.564185		3889010	4758878	0.312436	0.328199	0.951972		8651073	8494685	0.89943	0.76375
		9.216	4395761	3566071	0.529079	0.606682	0.872086		6658502	7878741	0.536114	0.674554	0.794769		6202444	9527121	0.420339	0.690718	0.608555		7123264	10213401	0.680571	0.781964	0.870334			6624995	10377581	0.793728	0.895417	0.886434		4139071	7048777	0.219694	0.387595	0.566813		3873959	4767467	0.310549	0.329112	0.943595		8689995	8543127	0.905152	0.771171
		9.288	4429291	3571214	0.534487	0.607884	0.879257		6600338	7823981	0.529361	0.667074	0.793557		6180100	9506915	0.418507	0.688923	0.607481		7146195	10288210	0.683151	0.788912	0.865941			6714376	10501104	0.806021	0.907564	0.888114		4133729	7096186	0.219318	0.39087	0.561102		3782581	4660167	0.299089	0.3177	0.941419		8975414	8811081	0.947109	0.812219
		9.36	4375569	3527406	0.525822	0.597645	0.879824		6527094	7803391	0.520858	0.664262	0.784115		6082837	9395266	0.410532	0.679004	0.604608		7016658	10128881	0.668573	0.774115	0.86366			6794129	10638231	0.81699	0.92105	0.88702		4096094	7053203	0.216672	0.387901	0.558575		3772733	4698084	0.297854	0.321733	0.92578		9025569	8841490	0.954482	0.816877
		9.432	4342898	3476421	0.520553	0.585728	0.888729		6487606	7798884	0.516273	0.663646	0.777934		6056193	9381359	0.408347	0.677769	0.602487		7041088	10165148	0.671322	0.777483	0.863455			6875185	10776010	0.828137	0.934599	0.886088		4075426	7003824	0.215218	0.384489	0.559752		3712199	4672690	0.290263	0.319032	0.909822		9183787	9022436	0.977741	0.844597
		9.504	4361450	3457090	0.523545	0.581209	0.900786		6437360	7763422	0.510439	0.658802	0.774799		5959170	9294458	0.400391	0.670049	0.597554		7034953	10183772	0.670632	0.779213	0.860653			6961420	10936210	0.839998	0.950354	0.883879		4028166	6894375	0.211895	0.376927	0.562166		3673393	4667469	0.285396	0.318477	0.896128		9219412	9077066	0.982978	0.852965
		9.576	4280870	3399800	0.510549	0.567818	0.899141		6415265	7734305	0.507874	0.654825	0.775587		5822727	9133283	0.389202	0.655731	0.593539		6969535	10111445	0.663269	0.772496	0.858606			6957150	10957959	0.83941	0.952493	0.881277		4028740	6812230	0.211936	0.371251	0.570869		3688545	4684165	0.287296	0.320253	0.897093		9188060	9083475	0.978369	0.853947
		9.648	4310973	3414718	0.515404	0.571305	0.902151		6316563	7636182	0.496415	0.641423	0.773928		5830398	9171177	0.389832	0.659098	0.591462		6971768	10204245	0.663521	0.781114	0.849454			7041127	11117967	0.85096	0.968228	0.878884		4009054	6810023	0.210552	0.371099	0.567374		3609236	4563136	0.27735	0.307381	0.902303		9335209	9344909	1	0.893997
		9.72	4170300	3335793	0.492716	0.552858	0.891216		6318817	7695896	0.496676	0.649579	0.764613		5690309	9005817	0.378344	0.644408	0.587119		6937446	10069080	0.659658	0.768562	0.858302			7023504	11154179	0.848536	0.971789	0.873169		3960249	6707779	0.20712	0.364034	0.568957		3654009	4588319	0.282965	0.310059	0.912617		9226995	9295498	0.984092	0.886427
		9.792	4203220	3346628	0.498025	0.55539	0.896712		6226271	7616605	0.485932	0.638749	0.760756		5652466	8969493	0.375241	0.641181	0.585234		7004463	10188932	0.6672	0.779692	0.855723			7035356	11231523	0.850166	0.979396	0.868052		3927872	6716376	0.204843	0.364628	0.561787		3624445	4531193	0.279258	0.303983	0.918661		9253519	9420619	0.987991	0.905595
		9.864	4104629	3301144	0.482124	0.544759	0.885023		6192032	7639292	0.481956	0.641847	0.75089		5554535	8859829	0.367211	0.631439	0.581545		6970528	10136134	0.663381	0.774789	0.856209			7040202	11270221	0.850833	0.983201	0.86537		3905657	6700824	0.203281	0.363554	0.559151		3607241	4552676	0.2771	0.306268	0.904763		9124667	9341042	0.96905	0.893404
		9.936	4030000	3274183	0.470088	0.538457	0.873027		6140023	7611324	0.475918	0.638027	0.745921		5482346	8772579	0.361291	0.623689	0.579281		6900122	10069967	0.655457	0.768644	0.852745			6997127	11272513	0.844908	0.983427	0.859147		3911916	6705981	0.203721	0.36391	0.559812		3604995	4593479	0.276818	0.310608	0.891216		8999906	9350047	0.95071	0.894784
		10.008	4061044	3331855	0.475094	0.551937	0.860776		6088833	7557053	0.469975	0.630614	0.745265		5527738	8820136	0.365013	0.627913	0.581312		6922645	10183254	0.657992	0.779165	0.844484			7048996	11406803	0.852042	0.996633	0.854921		3902583	6685149	0.203065	0.362471	0.560225		3493364	4472996	0.262819	0.297794	0.882554		8920359	9477092	0.939016	0.914246
		10.08	3925615	3237252	0.453252	0.529825	0.855475		6118050	7606353	0.473367	0.637348	0.742713		5371575	8610188	0.352208	0.609263	0.578089		6883647	10116670	0.653603	0.772981	0.845561			7006277	11406991	0.846167	0.996652	0.84901		3928752	6694885	0.204905	0.363144	0.564254		3498844	4484766	0.263506	0.299046	0.881158		8787362	9396027	0.919465	0.901827
		10.152	3934750	3264281	0.454725	0.536143	0.848142		6010433	7519228	0.460873	0.625448	0.736868		5369573	8626538	0.352044	0.610715	0.576445		6882134	10186433	0.653433	0.77946	0.838315			7001311	11441040	0.845484	1	0.845484		3913384	6681951	0.203825	0.36225	0.562663		3439496	4402821	0.256064	0.29033	0.881973		8820518	9440955	0.924339	0.90871
		10.224	3876391	3207764	0.445313	0.522933	0.851569		6010133	7588058	0.460838	0.634849	0.725901		5280597	8521336	0.344748	0.60137	0.573271		6836022	10108129	0.648243	0.772188	0.839489			6957320	11406965	0.839434	0.996649	0.842256		3879369	6602364	0.201433	0.356751	0.564632		3385431	4361231	0.249283	0.285907	0.871904		8820418	9443613	0.924324	0.909117
		10.296	3861246	3183000	0.44287	0.517144	0.856377		5945851	7513631	0.453374	0.624683	0.725767		5238533	8467860	0.341298	0.596619	0.572054		6764438	10061641	0.640187	0.767871	0.833717			6935778	11431448	0.836471	0.999057	0.837261		3858899	6602570	0.199994	0.356765	0.560575		3351500	4367048	0.245028	0.286526	0.85517		8873461	9520667	0.932122	0.920921
		10.368	3823128	3108692	0.436723	0.499776	0.873837		5932585	7459949	0.451834	0.617351	0.731892		5163694	8356957	0.335162	0.586767	0.5712		6784496	10154611	0.642444	0.776505	0.827354			6899859	11430802	0.831531	0.998993	0.832369		3811231	6568171	0.196642	0.354389	0.554877		3333273	4351876	0.242742	0.284912	0.851991		8864723	9550620	0.930837	0.92551
		10.44	3770771	3027392	0.428278	0.480773	0.890812		5951762	7520286	0.454061	0.625592	0.725809		5079653	8268083	0.32827	0.578872	0.567086		6788057	10181744	0.642845	0.779025	0.825192			6839597	11393798	0.823243	0.995354	0.827085		3834317	6575044	0.198265	0.354864	0.558708		3308877	4352582	0.239683	0.284987	0.841031		8877260	9611524	0.93268	0.93484
		10.512	3811188	3014763	0.434797	0.477821	0.909957		5859254	7497364	0.44332	0.622461	0.712206		5066306	8298000	0.327176	0.58153	0.562612		6786693	10282101	0.642691	0.788345	0.815242			6736294	11286361	0.809035	0.984788	0.821532		3841877	6640833	0.198797	0.359409	0.553121		3288324	4340004	0.237105	0.283649	0.83591		8981132	9764574	0.94795	0.958285
		10.584	3739815	2952794	0.423286	0.463337	0.913559		5719933	7417109	0.427145	0.611499	0.698521		4998150	8204205	0.321587	0.573198	0.56104		6717987	10120151	0.634959	0.773304	0.821098			6683292	11222920	0.801746	0.97855	0.819321		3823567	6608399	0.197509	0.357168	0.552987		3261328	4362298	0.23372	0.28602	0.817144		9044403	9856538	0.957251	0.972374
		10.656	3691635	2912970	0.415515	0.454028	0.915174		5681191	7443390	0.422647	0.615089	0.687132		4970342	8157890	0.319307	0.569084	0.561089		6760712	10238199	0.639767	0.784267	0.815752			6623088	11128076	0.793466	0.969222	0.818662		3768369	6588212	0.193628	0.355773	0.544246		3246843	4339428	0.231903	0.283588	0.817747		9046632	9964187	0.957578	0.988864
		10.728	3632553	2882671	0.405986	0.446946	0.908355		5632553	7425713	0.417	0.612674	0.680623		4926290	8108979	0.315694	0.564739	0.55901		6781971	10252873	0.64216	0.78563	0.817382			6576809	11064631	0.787101	0.962983	0.817357		3706084	6510899	0.189249	0.350432	0.540045		3235844	4336110	0.230524	0.283235	0.813896		9036325	10036878	0.956063	1
		10.8	3524487	2808791	0.388557	0.429678	0.904298		5595996	7408948	0.412756	0.610384	0.676223		4816381	7969624	0.306682	0.552359	0.555222		6771191	10185204	0.640947	0.779346	0.822416			6430478	10798445	0.766976	0.936806	0.818714		3663804	6490487	0.186276	0.349021	0.533709		3206713	4334226	0.226871	0.283035	0.801565		8993335	10007656	0.949744	0.995523
		10.872	3568652	2829992	0.39568	0.434633	0.910376		5535300	7315644	0.405709	0.59764	0.678852		4825406	8048803	0.307422	0.559393	0.549563		6757729	10235219	0.639432	0.783991	0.815611			6359624	10740453	0.757231	0.931102	0.813263		3629109	6421283	0.183836	0.34424	0.534036		3160692	4270255	0.221099	0.276231	0.800414		8840988	9912806	0.927348	0.980993
		10.944	3463179	2740825	0.378669	0.413792	0.915119		5582923	7415756	0.411238	0.611314	0.672711		4725906	7925872	0.299263	0.548472	0.54563		6793372	10228962	0.643443	0.78341	0.821337			6237268	10597172	0.740403	0.917012	0.807408		3593842	6391936	0.181357	0.342212	0.529954		3148718	4243423	0.219598	0.273377	0.803276		8782299	9882030	0.918721	0.976279
		11.016	3446092	2726004	0.375913	0.410328	0.916129		5567076	7435144	0.409398	0.613963	0.666813		4704801	7938964	0.297532	0.549636	0.541326		6811624	10295892	0.645497	0.789625	0.817473			6132450	10476250	0.725987	0.90512	0.802089		3565692	6282520	0.179377	0.334652	0.536011		3159564	4239220	0.220958	0.27293	0.809576		8626620	9763504	0.895835	0.958122
		11.088	3381100	2696858	0.365431	0.403515	0.905619		5534837	7399983	0.405655	0.60916	0.665925		4630548	7770166	0.291443	0.534641	0.54512		6817196	10279450	0.646124	0.788098	0.819853			6006840	10324558	0.708712	0.890202	0.796124		3534012	6240717	0.17715	0.331764	0.533963		3110129	4152342	0.214758	0.26369	0.814433		8611675	9781996	0.893639	0.960954
		11.16	3318098	2661606	0.35527	0.395275	0.89879		5480676	7362004	0.399367	0.603972	0.661234		4557375	7725094	0.285443	0.530637	0.537926		6801233	10261853	0.644328	0.786464	0.819272			5868361	10158494	0.689666	0.873871	0.789208		3522172	6191865	0.176317	0.328389	0.536916		3114729	4144647	0.215335	0.262872	0.819163		8490791	9722487	0.875868	0.951838
		11.232	3289761	2662498	0.3507	0.395484	0.88676		5442286	7332427	0.39491	0.599932	0.658257		4517691	7682156	0.282189	0.526822	0.535644		6811670	10295185	0.645502	0.78956	0.817547			5798700	10084975	0.680086	0.866641	0.784738		3507659	6158765	0.175297	0.326102	0.537552		3101290	4109510	0.21365	0.259135	0.824473		8263447	9588121	0.842448	0.931254
		11.304	3189375	2605800	0.334509	0.382232	0.875147		5441500	7324775	0.394819	0.598887	0.659254		4425199	7594319	0.274605	0.519019	0.529084		6875062	10349179	0.652637	0.794574	0.821367			5669492	9900204	0.662316	0.84847	0.7806		3494192	6217954	0.17435	0.330191	0.528026		3074587	4053238	0.210301	0.25315	0.830736		8157312	9516854	0.826846	0.920337
		11.376	3194072	2614904	0.335267	0.38436	0.872273		5387972	7260116	0.388604	0.590055	0.658589		4401259	7572347	0.272642	0.517068	0.527285		6911864	10432564	0.656779	0.802318	0.818602			5565856	9726769	0.648062	0.831414	0.77947		3485100	6240488	0.173711	0.331748	0.523621		3071836	4038920	0.209956	0.251627	0.834393		7888240	9360440	0.787292	0.896376
		11.448	3144841	2566797	0.327326	0.373115	0.87728		5272992	7152116	0.375255	0.575304	0.652272		4345948	7465500	0.268106	0.507576	0.528209		6927960	10475530	0.65859	0.806308	0.816797			5441076	9540924	0.630901	0.813138	0.775884		3501303	6339944	0.17485	0.33862	0.51636		2997378	3997104	0.200618	0.24718	0.811629		7762697	9265060	0.768836	0.881764
		11.52	3110273	2537087	0.321751	0.366171	0.878691		5223750	7113655	0.369537	0.57005	0.648254		4299408	7413732	0.26429	0.502977	0.525451		6924939	10518845	0.65825	0.810331	0.812323			5345438	9415469	0.617748	0.8008	0.771413		3556049	6413667	0.178699	0.343714	0.519907		2979042	4006587	0.198319	0.248189	0.799065		7596496	9100322	0.744404	0.856528
		11.592	3046617	2502898	0.311485	0.35818	0.869632		5115633	7060641	0.356985	0.562809	0.634292		4221642	7307930	0.257913	0.493578	0.522537		6946039	10660406	0.660625	0.823477	0.802238			5236650	9267519	0.602786	0.78625	0.766659		3605383	6485652	0.182168	0.348687	0.52244		2966812	4019219	0.196785	0.249532	0.788617		7527801	9031039	0.734306	0.845915
		11.664	3023293	2481795	0.307723	0.353247	0.871126		4998819	6951996	0.343423	0.547969	0.626719		4158168	7259276	0.252708	0.489256	0.516515		6994044	10753048	0.666028	0.832081	0.800436			5117654	9084354	0.58642	0.768237	0.763332		3611884	6579060	0.182625	0.355141	0.514233		2949984	4026446	0.194675	0.250301	0.777764		7426675	8961992	0.71944	0.835337
		11.736	2998112	2454996	0.303661	0.346983	0.875148		4946088	6885211	0.3373	0.538847	0.625967		4125073	7227000	0.249994	0.486389	0.51398		7013681	10825565	0.668238	0.838815	0.796644			4982291	8878132	0.567803	0.747957	0.759139		3636500	6633412	0.184356	0.358896	0.513675		2971127	4062058	0.197326	0.254088	0.776605		7253719	8846488	0.694015	0.817643
		11.808	2967764	2439341	0.298767	0.343324	0.870218		4783756	6658868	0.318453	0.50793	0.626963		4083011	7153980	0.246545	0.479902	0.513741		7004046	10810935	0.667153	0.837457	0.796642			4901129	8780830	0.556641	0.738388	0.753859		3596659	6611926	0.181555	0.357412	0.507971		2932217	4064027	0.192447	0.254298	0.756777		7260244	8808264	0.694974	0.811787
		11.88	2957433	2428370	0.297101	0.34076	0.871877		4748437	6594685	0.314353	0.499163	0.629759		4022915	7095572	0.241617	0.474714	0.508975		7015522	10901545	0.668445	0.845872	0.790244			4838401	8702887	0.548014	0.730723	0.749961		3541578	6430111	0.177682	0.34485	0.515244		2904837	4032789	0.189013	0.250975	0.753114		7099292	8683852	0.671314	0.792729
		11.952	2890475	2380210	0.286301	0.329503	0.868889		4690941	6530218	0.307677	0.490358	0.627455		3944469	6977399	0.235185	0.464216	0.506628		7041883	10954934	0.671412	0.85083	0.789126			4774758	8597062	0.539261	0.720316	0.748645		3480105	6271194	0.173359	0.33387	0.519242		2909159	4029665	0.189555	0.250643	0.756275		6993012	8592443	0.655691	0.778726
		12.024	2855188	2368434	0.28061	0.32675	0.858791		4631434	6416777	0.300769	0.474863	0.63338		3867704	6860393	0.22889	0.453822	0.504361		7082133	11062625	0.675941	0.860831	0.78522			4650179	8367737	0.522127	0.697764	0.748286		3394422	6150121	0.167335	0.325505	0.514077		2883516	3978992	0.186339	0.245254	0.759781		6885906	8517637	0.639946	0.767266
		12.096	2842755	2359172	0.278605	0.324586	0.858341		4555693	6319106	0.291975	0.461522	0.632635		3882218	6915731	0.23008	0.458738	0.501551		6979836	10981935	0.664429	0.853337	0.778624			4620539	8263372	0.518051	0.6875	0.753528		3321522	6042248	0.162209	0.318052	0.510008		2849208	3955956	0.182037	0.242804	0.749728		6703668	8389401	0.613156	0.747621
		12.168	2780134	2297703	0.268505	0.310218	0.865537		4497695	6188714	0.285241	0.443711	0.642853		3782337	6727296	0.22189	0.441998	0.502015		7035911	11072428	0.670739	0.861741	0.778354			4521474	8058456	0.504426	0.667348	0.755866		3257197	5970234	0.157686	0.313076	0.503666		2854517	4013487	0.182702	0.248922	0.733973		6640420	8353383	0.603859	0.742104
		12.24	2776741	2281922	0.267958	0.306529	0.874168		4465922	6132041	0.281552	0.43597	0.645806		3743631	6710236	0.218716	0.440483	0.496537		7017378	11150333	0.668654	0.868976	0.769473			4426805	7890162	0.491406	0.650798	0.755082		3193226	5924396	0.153188	0.309909	0.4943		2843233	4047633	0.181287	0.252554	0.717816		6464641	8212089	0.578019	0.720459
		12.312	2712210	2231203	0.25755	0.294675	0.874016		4408966	6027692	0.27494	0.421717	0.651953		3672581	6618015	0.21289	0.432291	0.49247		7014350	11187943	0.668313	0.872469	0.766002			4286381	7690975	0.472093	0.631209	0.747919		3158308	5883515	0.150733	0.307084	0.490851		2853609	4068861	0.182589	0.254812	0.716563		6324695	8093695	0.557446	0.702322
		12.384	2700273	2225741	0.255625	0.293398	0.871257		4332536	5936349	0.266066	0.409241	0.650146		3616441	6552459	0.208286	0.426467	0.4884		6960806	11179468	0.662287	0.871682	0.75978			4162689	7521231	0.455081	0.614516	0.740552		3136385	5863219	0.149191	0.305682	0.48806		2814989	4002687	0.177745	0.247774	0.717369		6220306	7977040	0.542101	0.684451
		12.456	2641639	2191765	0.246168	0.285456	0.862368		4298650	5896560	0.262132	0.403806	0.649153		3560331	6548644	0.203685	0.426128	0.477991		6921018	11151271	0.657809	0.869063	0.756917			4079815	7440315	0.443683	0.606558	0.731477		3132105	5801458	0.14889	0.301415	0.493971		2780964	3951527	0.173478	0.242333	0.715868		6099549	7853415	0.524349	0.665513
		12.528	2572263	2157407	0.234979	0.277426	0.846999		4232778	5839552	0.254484	0.396019	0.642606		3441804	6404908	0.193966	0.413359	0.469243		6952426	11247519	0.661344	0.878002	0.753237			3946813	7236500	0.425391	0.586515	0.725287		3118000	5723278	0.147898	0.296013	0.499634		2710615	3862878	0.164656	0.232904	0.706968		6024752	7688689	0.513354	0.640279
		12.6	2565856	2175205	0.233946	0.281586	0.830816		4195777	5816234	0.250188	0.392834	0.63688		3417054	6386291	0.191937	0.411706	0.466199		6902194	11268370	0.65569	0.879938	0.745155			3867188	7104815	0.41444	0.573565	0.72257		3102374	5694497	0.1468	0.294025	0.499277		2656043	3782777	0.157812	0.224385	0.703309		5917097	7567184	0.497528	0.621665
		12.672	2501705	2100786	0.223599	0.264191	0.846354		4130513	5762339	0.242611	0.385472	0.629386		3321445	6217614	0.184097	0.396721	0.464045		6889244	11253011	0.654233	0.878512	0.744706			3750264	6929747	0.398359	0.556348	0.716026		3063306	5704358	0.144053	0.294706	0.488801		2603675	3760701	0.151245	0.222037	0.681169		5826240	7397690	0.484172	0.5957
		12.744	2503326	2119000	0.223861	0.268449	0.833906		4055340	5656611	0.233883	0.371031	0.63036		3283242	6132301	0.180964	0.389143	0.465033		6821868	11201545	0.64665	0.873732	0.740101			3683324	6812968	0.389153	0.544864	0.714221		3028788	5677857	0.141626	0.292875	0.48357		2550781	3685729	0.144611	0.214064	0.675554		5782135	7329979	0.477688	0.585328
		12.816	2417609	2051732	0.210036	0.252726	0.831084		4055704	5678028	0.233925	0.373956	0.625542		3245204	6049653	0.177845	0.381801	0.465806		6833366	11207701	0.647944	0.874304	0.741097			3631758	6731816	0.382061	0.536883	0.711628		3010891	5669584	0.140367	0.292304	0.480211		2524623	3655049	0.141331	0.210801	0.670449		5669799	7174007	0.461175	0.561434
		12.888	2384484	2050671	0.204694	0.252478	0.81074		3985032	5593260	0.22572	0.362378	0.622887		3192853	5930086	0.173552	0.371179	0.46757		6838993	11302841	0.648578	0.88314	0.7344			3589276	6625573	0.376218	0.526435	0.714654		3007451	5679025	0.140125	0.292956	0.478316		2516339	3639863	0.140292	0.209185	0.670659		5611386	7119545	0.452588	0.553091
		12.96	2407563	2067395	0.208416	0.256387	0.812897		3949350	5521934	0.221578	0.352635	0.628348		3200028	5931923	0.17414	0.371342	0.468949		6812206	11343755	0.645563	0.886939	0.727855			3528613	6493305	0.367875	0.513427	0.716509		3020997	5687021	0.141078	0.293508	0.480661		2479902	3579283	0.135723	0.202742	0.669434		5531755	7051398	0.440882	0.542651
		13.032	2342791	1995908	0.197969	0.239677	0.825982		3873093	5415349	0.212724	0.338077	0.629218		3100051	5808188	0.165942	0.360351	0.460503		6741641	11226527	0.637621	0.876052	0.727835			3492521	6435469	0.362911	0.507739	0.714759		3036640	5711932	0.142178	0.295229	0.481584		2470921	3593935	0.134596	0.204301	0.658815		5512404	7007764	0.438037	0.535967
		13.104	2364514	2029224	0.201473	0.247465	0.814148		3867663	5413357	0.212094	0.337805	0.627859		3076173	5786590	0.163984	0.358432	0.457505		6750323	11380459	0.638598	0.890348	0.717246			3443860	6352376	0.356219	0.499568	0.713054		3003772	5626895	0.139867	0.289354	0.483376		2458918	3576493	0.133091	0.202446	0.657416		5491864	6924228	0.435018	0.52317
		13.176	2285893	1971487	0.188793	0.233969	0.806911		3817151	5358075	0.206229	0.330254	0.624457		3000971	5648232	0.157818	0.346141	0.455935		6737470	11421236	0.637152	0.894135	0.71259			3399593	6263846	0.350131	0.490862	0.713299		3007312	5602835	0.140116	0.287692	0.487034		2471896	3576595	0.134719	0.202457	0.66542		5495455	6869674	0.435546	0.514813
		13.248	2287202	1998932	0.189004	0.240384	0.786256		3773360	5310791	0.201145	0.323795	0.621211		2979788	5615850	0.156081	0.343264	0.454695		6674976	11432538	0.630118	0.895184	0.703898			3383070	6167020	0.347858	0.481339	0.722688		2973284	5523452	0.137723	0.282207	0.488021		2440784	3533514	0.130817	0.197875	0.66111		5487342	6848449	0.434353	0.511561
		13.32	2286577	1988653	0.188903	0.237982	0.793771		3680180	5191190	0.190327	0.307459	0.619031		2954013	5584246	0.153967	0.340457	0.452237		6577830	11361587	0.619185	0.888595	0.696814			3310099	6035714	0.337823	0.468426	0.721186		2936923	5475477	0.135166	0.278892	0.484654		2402340	3484100	0.125996	0.192619	0.654118		5468280	6840823	0.431551	0.510393
		13.392	2226479	1948384	0.17921	0.228569	0.784051		3630537	5196466	0.184563	0.308179	0.598882		2886818	5455736	0.148457	0.329041	0.451182		6576265	11373014	0.619009	0.889656	0.695784			3259661	5964770	0.330886	0.46145	0.717057		2888782	5409384	0.131781	0.274326	0.480383		2404330	3551605	0.126245	0.199799	0.631862		5446616	6799582	0.428366	0.504075
		13.464	2282956	2000847	0.188319	0.240832	0.781951		3563898	5096915	0.176826	0.294582	0.600262		2903875	5525600	0.149856	0.335247	0.447001		6529061	11404221	0.613697	0.892555	0.687573			3197438	5890623	0.322328	0.454158	0.709727		2822105	5336014	0.127093	0.269257	0.472015		2387932	3552190	0.124189	0.199861	0.621376		5410539	6748536	0.423063	0.496256
		13.536	2232877	1947575	0.180242	0.22838	0.789219		3484175	5000719	0.16757	0.281442	0.595398		2857809	5417232	0.146078	0.32562	0.448616		6494568	11441521	0.609815	0.896019	0.680582			3160191	5855543	0.317205	0.450708	0.703793		2783010	5292973	0.124344	0.266283	0.466963		2386503	3566034	0.12401	0.201333	0.615942		5328325	6670620	0.410977	0.48432
		13.608	2226255	1961268	0.179174	0.231581	0.773699		3418097	4906899	0.159898	0.268627	0.595243		2837197	5433743	0.144388	0.327087	0.441437		6377554	11361355	0.596645	0.888574	0.671464			3129814	5792098	0.313027	0.444469	0.704274		2755440	5252258	0.122406	0.26347	0.464591		2359134	3510101	0.120577	0.195385	0.617128		5263315	6587215	0.40142	0.471543
		13.68	2209645	1966010	0.176495	0.232689	0.758501		3360068	4843310	0.153161	0.259941	0.589214		2802020	5397906	0.141504	0.323904	0.43687		6357625	11351225	0.594402	0.887633	0.669649			3084979	5732877	0.306861	0.438645	0.699567		2736078	5220805	0.121044	0.261296	0.463245		2320088	3471759	0.115681	0.191307	0.604687		5149625	6492466	0.384708	0.457028
		13.752	2179272	1929626	0.171596	0.224185	0.765423		3294391	4786588	0.145536	0.252194	0.57708		2743780	5298752	0.136728	0.315095	0.433926		6315133	11345990	0.58962	0.887147	0.664625			3057042	5685099	0.303019	0.433946	0.698287		2714422	5200374	0.119521	0.259885	0.459902		2310748	3461225	0.114509	0.190186	0.60209		5080446	6463449	0.374538	0.452583
		13.824	2256096	1981776	0.183987	0.236374	0.778371		3267292	4774846	0.14239	0.25059	0.568218		2761220	5381687	0.138158	0.322463	0.428447		6193478	11245100	0.575929	0.877777	0.656122			2991254	5593318	0.293971	0.42492	0.691827		2710574	5198503	0.119251	0.259756	0.459089		2301321	3437349	0.113327	0.187647	0.603938		5012301	6406263	0.364521	0.443823
		13.896	2184863	1911258	0.172498	0.219892	0.784469		3186696	4667702	0.133032	0.235955	0.563804		2698817	5277903	0.133041	0.313243	0.424721		6145913	11176107	0.570575	0.87137	0.654803			2939199	5503670	0.286812	0.416104	0.689279		2659264	5141568	0.115643	0.255822	0.452046		2289716	3449615	0.111872	0.188952	0.592066		4981214	6327656	0.359951	0.431781
		13.968	2223436	1902840	0.178719	0.217924	0.820099		3165590	4635570	0.130582	0.231566	0.563908		2681891	5339598	0.131653	0.318724	0.413063		6012122	11010359	0.555518	0.855977	0.648987			2870192	5419128	0.277321	0.40779	0.680059		2631929	5102965	0.113721	0.253155	0.449216		2292939	3465753	0.112276	0.190668	0.588856		4926904	6236622	0.351967	0.417835
		14.04	2211596	1895276	0.17681	0.216156	0.817972		3130106	4578888	0.126462	0.223824	0.565008		2626875	5274578	0.127142	0.312948	0.406271		5938914	10961439	0.547279	0.851434	0.642773			2828516	5355716	0.271589	0.401554	0.676346		2587590	5032760	0.110603	0.248304	0.445436		2289022	3517468	0.111785	0.196168	0.569842		4893849	6197119	0.347108	0.411784
		14.112	2151967	1839611	0.167193	0.203145	0.82302		3081020	4508559	0.120763	0.214217	0.563741		2580772	5215511	0.123361	0.307701	0.400913		5898189	10912468	0.542696	0.846886	0.640813			2794746	5265778	0.266945	0.392709	0.679752		2554396	5005915	0.108269	0.246449	0.439317		2270451	3540719	0.109456	0.198641	0.551023		4811516	6124797	0.335005	0.400705
		14.184	2195511	1872994	0.174215	0.210948	0.825869		3060683	4492997	0.118402	0.212092	0.558258		2569266	5203070	0.122418	0.306596	0.399281		5818048	10791467	0.533676	0.835649	0.638637			2780188	5243357	0.264943	0.390504	0.678463		2521143	4947470	0.105931	0.242411	0.43699		2243270	3520610	0.106047	0.196502	0.539674		4665378	6015829	0.313522	0.384012
		14.256	2130091	1833747	0.163664	0.201775	0.811125		3008247	4407520	0.112314	0.200416	0.560404		2521062	5105592	0.118465	0.297936	0.397619		5781253	10742152	0.529535	0.831069	0.637174			2745846	5173250	0.260219	0.38361	0.678345		2486727	4882701	0.103511	0.237936	0.435039		2190718	3446445	0.0994567	0.188614	0.527301		4586500	5946630	0.301927	0.373411
		14.328	2102432	1807552	0.159203	0.195652	0.813708		3010818	4368753	0.112613	0.195121	0.577142		2495618	5073166	0.116379	0.295056	0.394429		5747540	10716466	0.525741	0.828684	0.634429			2719350	5128227	0.256575	0.379182	0.676655		2506874	4957364	0.104928	0.243095	0.431634		2141809	3396691	0.0933231	0.183323	0.509064		4488762	5853278	0.287559	0.35911
		14.4	2093489	1806521	0.157761	0.195411	0.80733		3003534	4358162	0.111767	0.193674	0.577086		2447010	4935690	0.112393	0.282843	0.397368		5722197	10741657	0.522889	0.831023	0.629211			2706658	5085293	0.25483	0.37496	0.679619		2506511	5004560	0.104903	0.246356	0.425817		2085372	3290728	0.0862454	0.172053	0.501272		4466495	5822000	0.284286	0.354319
		14.472	2027348	1753536	0.147094	0.183026	0.803675		2984652	4315709	0.109575	0.187876	0.583229		2387151	4853344	0.107484	0.275528	0.390103		5682020	10699800	0.518367	0.827136	0.626701			2683431	5004461	0.251635	0.36701	0.685636		2481300	5010568	0.10313	0.246771	0.417918		2065548	3238994	0.0837593	0.166551	0.502905		4424826	5778955	0.27816	0.347725
		14.544	2038385	1760994	0.148874	0.184769	0.805727		2987771	4329569	0.109937	0.189769	0.579319		2375345	4829781	0.106516	0.273435	0.389549		5604557	10590714	0.509649	0.817005	0.623802			2634501	4948000	0.244906	0.361458	0.67755		2467331	4961687	0.102148	0.243394	0.419681		2038711	3179723	0.0803937	0.160247	0.501686		4368961	5753822	0.269948	0.343875
		14.616	1983218	1729069	0.139976	0.177307	0.789455		2953659	4305306	0.105976	0.186455	0.568375		2326843	4708940	0.102539	0.2627	0.390327		5592082	10577700	0.508245	0.815796	0.623005			2592400	4873236	0.239116	0.354105	0.675267		2448716	4936978	0.100839	0.241686	0.41723		2034445	3174883	0.0798588	0.159732	0.499954		4345912	5750650	0.26656	0.343389
		14.688	1966527	1704985	0.137284	0.171678	0.79966		2917667	4213318	0.101798	0.17389	0.585414		2275900	4667369	0.0983617	0.259007	0.379764		5507306	10475481	0.498704	0.806304	0.618507			2555883	4850003	0.234093	0.351821	0.665377		2419045	4886536	0.0987525	0.238201	0.414576		2014146	3114182	0.0773131	0.153276	0.504403		4307894	5718061	0.260971	0.338396
		14.76	1950475	1689218	0.134695	0.167993	0.801792		2894971	4223816	0.0991626	0.175324	0.565596		2254139	4597025	0.0965773	0.252758	0.382094		5426788	10431209	0.489642	0.802192	0.61038			2529258	4810792	0.230432	0.347964	0.662227		2381604	4833912	0.0961199	0.234565	0.409779		2011797	3095513	0.0770185	0.151291	0.509076		4345917	5717693	0.26656	0.33834
		14.832	1906488	1652886	0.127601	0.159501	0.800002		2849521	4174362	0.0938858	0.168569	0.556957		2217119	4529006	0.0935417	0.246716	0.379147		5268893	10262973	0.471872	0.786568	0.599913			2497269	4727384	0.226032	0.339762	0.665266		2337699	4802246	0.0930327	0.232377	0.400352		1986629	3057092	0.0738622	0.147205	0.501766		4371377	5711908	0.270303	0.337454
		14.904	1906943	1653157	0.127674	0.159564	0.800145		2831870	4137341	0.0918364	0.163512	0.561649		2208527	4505027	0.0928371	0.244586	0.379569		5159937	10099683	0.45961	0.771404	0.59581			2475356	4670169	0.223018	0.334135	0.667449		2299275	4706831	0.090331	0.225785	0.400075		1980541	3031414	0.0730988	0.144474	0.505966		4391562	5742565	0.27327	0.34215
		14.976	1871561	1624886	0.121968	0.152956	0.797404		2830727	4139887	0.0917037	0.16386	0.559647		2168853	4448608	0.0895838	0.239574	0.37393		5083282	9962795	0.450983	0.758691	0.594422			2454756	4619162	0.220185	0.329119	0.669014		2282972	4676292	0.0891847	0.223675	0.398724		1968583	3014948	0.0715991	0.142722	0.501667		4347979	5747015	0.266864	0.342832
		15.048	1821784	1596854	0.11394	0.146404	0.778255		2805704	4082393	0.0887985	0.156007	0.569196		2122006	4412967	0.0857424	0.236408	0.362689		4957165	9690524	0.436789	0.733405	0.595563			2409264	4565777	0.213929	0.323869	0.66054		2304421	4709808	0.0906929	0.225991	0.401312		1952015	2994744	0.0695214	0.140574	0.494555		4294558	5771814	0.259011	0.346631
		15.12	1814878	1598807	0.112826	0.14686	0.768252		2808970	4089136	0.0891777	0.156928	0.568272		2102240	4365544	0.0841215	0.232195	0.362288		4882970	9499181	0.428439	0.715636	0.598683			2403943	4588167	0.213197	0.326071	0.653835		2286380	4657878	0.0894243	0.222403	0.402083		1946662	3026226	0.0688501	0.143922	0.478385		4270282	5821181	0.255442	0.354193
		15.192	1780422	1575886	0.107269	0.141503	0.758066		2775623	4058725	0.0853061	0.152774	0.558381		2064588	4255433	0.0810341	0.222413	0.36434		4748452	9229742	0.4133	0.690613	0.598453			2352178	4452613	0.206077	0.31274	0.658941		2289057	4623383	0.0896126	0.220019	0.407294		1915392	2978545	0.0649285	0.138851	0.467614		4189566	5764665	0.243576	0.345536
		15.264	1782277	1597381	0.107568	0.146527	0.734115		2771506	4040211	0.0848281	0.150245	0.564598		2062077	4216493	0.0808282	0.218954	0.369156		4679387	9082857	0.405527	0.676972	0.59903			2332324	4391006	0.203347	0.306682	0.663055		2241384	4523396	0.0862605	0.213111	0.404768		1910521	3002214	0.0643177	0.141368	0.454966		4170833	5754354	0.240823	0.343956
		15.336	1754045	1576631	0.103014	0.141677	0.727107		2742420	3997348	0.0814512	0.144391	0.564103		2032955	4127460	0.0784402	0.211045	0.371675		4586140	8920596	0.395032	0.661903	0.596813			2297354	4323734	0.198537	0.300066	0.661645		2203750	4486113	0.0836143	0.210535	0.397151		1897048	2977622	0.0626281	0.138753	0.451365		4125792	5690798	0.234202	0.33422
		15.408	1732036	1552819	0.0994648	0.136111	0.73076		2723130	3968940	0.0792116	0.14051	0.563742		2010557	4047361	0.0766035	0.20393	0.375637		4471042	8694429	0.382079	0.640899	0.59616			2248786	4219462	0.191858	0.289812	0.662008		2178166	4445124	0.0818154	0.207703	0.393906		1893166	2943036	0.0621412	0.135074	0.460053		4078671	5627909	0.227275	0.324586
		15.48	1744009	1539205	0.101396	0.132929	0.76278		2738503	3977939	0.0809964	0.141739	0.571446		2028208	4061000	0.0780509	0.205141	0.380474		4401934	8556124	0.374301	0.628055	0.595968			2224686	4178974	0.188543	0.28583	0.659634		2131934	4348916	0.0785647	0.201056	0.39076		1897228	2931723	0.0626506	0.133871	0.467993		4060555	5588688	0.224611	0.318577
		15.552	1714968	1509334	0.096712	0.125947	0.767876		2714529	3939087	0.078213	0.136433	0.573272		1982058	3971664	0.0742666	0.197205	0.376596		4274604	8428438	0.359971	0.616197	0.584181			2190269	4120637	0.18381	0.280093	0.656245		2145855	4382768	0.0795435	0.203395	0.391079		1868936	2882488	0.0591026	0.128634	0.459461		3969113	5442555	0.211169	0.296191
		15.624	1704652	1508702	0.0950482	0.1258	0.755552		2714507	3978900	0.0782104	0.141871	0.55128		1970403	3968871	0.0733109	0.196957	0.372218		4225699	8330930	0.354467	0.607142	0.583829			2163653	4079775	0.180149	0.276074	0.652538		2145973	4394873	0.0795518	0.204231	0.389518		1864525	2878027	0.0585494	0.12816	0.456846		3941265	5390009	0.207076	0.288142
		15.696	1686607	1507298	0.0921378	0.125471	0.734333		2693855	3961303	0.0758127	0.139467	0.543588		1928614	3910856	0.0698842	0.191803	0.364353		4127884	8230569	0.343458	0.597821	0.574517			2138321	4026855	0.176665	0.27087	0.652213		2135647	4447699	0.0788258	0.207881	0.379187		1846246	2859801	0.0562571	0.126222	0.445701		3913835	5305604	0.203043	0.275212
		15.768	1656093	1490425	0.0872164	0.121528	0.717668		2642459	3899101	0.0698455	0.130971	0.533291		1899798	3918357	0.0675212	0.19247	0.350815		4042916	8063445	0.333896	0.582301	0.573408			2108986	3955034	0.172631	0.263807	0.654382		2120390	4400937	0.077753	0.20465	0.379931		1839564	2849445	0.0554191	0.12512	0.442927		3948870	5340777	0.208193	0.2806
		15.84	1650238	1497115	0.0862721	0.123091	0.700879		2595877	3849232	0.0644373	0.124159	0.518989		1875203	3865340	0.0655044	0.18776	0.348873		3999991	8037885	0.329065	0.579927	0.567425			2078336	3879266	0.168415	0.256356	0.656959		2120298	4425373	0.0777465	0.206339	0.376791		1850782	2884315	0.0568259	0.128829	0.441096		3915820	5303690	0.203335	0.274918
		15.912	1625415	1476563	0.0822686	0.118288	0.695497		2571417	3774328	0.0615974	0.113928	0.54067		1820440	3745730	0.0610139	0.177134	0.344449		3922994	7883448	0.320399	0.565584	0.566492			2028499	3782324	0.161561	0.246822	0.654564		2127838	4481507	0.0782767	0.210217	0.372361		1851636	2896748	0.056933	0.130151	0.437438		3856627	5255457	0.194634	0.267529
		15.984	1626093	1471933	0.0823779	0.117205	0.702851		2539428	3728449	0.0578835	0.107661	0.537644		1819163	3721099	0.0609091	0.174946	0.348159		3857720	7817601	0.313053	0.559469	0.559553			1986536	3740765	0.15579	0.242735	0.641809		2124522	4514825	0.0780435	0.212519	0.367231		1883032	2960035	0.0608703	0.136882	0.444692		3773650	5123726	0.182436	0.247349
		16.056	1625662	1468679	0.0823084	0.116445	0.706845		2525902	3700011	0.0563131	0.103777	0.542636		1794922	3672343	0.0589214	0.170615	0.345347		3774855	7676075	0.303727	0.546326	0.555945			1938031	3675470	0.149119	0.236314	0.631019		2109637	4506045	0.0769969	0.211912	0.363343		1922472	3018631	0.0658164	0.143114	0.459888		3712506	5045003	0.173447	0.23529
		16.128	1612418	1458934	0.0801724	0.114167	0.702238		2495788	3675894	0.0528168	0.100483	0.52563		1765831	3579026	0.0565359	0.162326	0.348287		3733802	7600207	0.299107	0.53928	0.554641			1900845	3620935	0.144004	0.230951	0.623528		2114215	4538619	0.0773188	0.214163	0.361028		1978590	3097006	0.0728541	0.15145	0.481045		3640521	4926994	0.162865	0.217212
		16.2	1602329	1461376	0.0785452	0.114738	0.684563		2481598	3645663	0.0511693	0.0963535	0.531058		1758078	3553711	0.0559002	0.160077	0.349209		3679003	7518980	0.292939	0.531737	0.550911			1872706	3579373	0.140134	0.226864	0.617703		2106191	4505056	0.0767546	0.211844	0.362317		2003020	3119694	0.0759178	0.153863	0.493413		3538806	4804871	0.147913	0.198504
		16.272	1603644	1459867	0.0787573	0.114385	0.688528		2491698	3665449	0.0523419	0.0990561	0.528407		1723803	3469623	0.0530896	0.152607	0.347885		3641017	7445209	0.288664	0.524886	0.549957			1831441	3493317	0.134459	0.218401	0.615654		2118003	4545280	0.0775851	0.214623	0.361495		2018573	3136268	0.0778683	0.155625	0.500357		3451045	4721864	0.135012	0.185788
		16.344	1587578	1430366	0.0761661	0.10749	0.708591		2470212	3650556	0.0498474	0.0970218	0.513775		1710363	3444863	0.0519875	0.150407	0.345645		3566127	7305253	0.280236	0.511888	0.547455			1813746	3456441	0.132025	0.214774	0.614718		2109656	4492303	0.0769982	0.210963	0.364985		2018399	3116680	0.0778465	0.153542	0.507004		3383242	4685650	0.125045	0.18024
		16.416	1613714	1418051	0.0803814	0.104611	0.768383		2465029	3652588	0.0492456	0.0972994	0.506125		1689544	3412731	0.0502804	0.147553	0.340762		3533257	7285326	0.276537	0.510037	0.542189			1780166	3409377	0.127407	0.210146	0.60628		2129947	4498145	0.078425	0.211366	0.371038		2004420	3064128	0.0760934	0.147953	0.514308		3341449	4616016	0.118901	0.169573
		16.488	1579823	1379071	0.0749154	0.0955001	0.784453		2417326	3567474	0.0437072	0.0856736	0.51016		1673561	3336735	0.0489697	0.140802	0.347792		3460814	7110749	0.268384	0.493825	0.543479			1772403	3413844	0.126339	0.210585	0.599945		2108103	4455983	0.076889	0.208453	0.368855		1997306	3041871	0.0752012	0.145586	0.516542		3343637	4630329	0.119223	0.171766
		16.56	1594592	1385781	0.0772974	0.0970685	0.796318		2405139	3569439	0.0422923	0.085942	0.492103		1666327	3326900	0.0483766	0.139928	0.345724		3430733	7069083	0.264998	0.489955	0.540862			1752311	3407645	0.123576	0.209975	0.588527		2081247	4387645	0.0750007	0.203732	0.368134		1965383	3001789	0.0711978	0.141323	0.503796		3344578	4585658	0.119361	0.164922
		16.632	1561961	1369554	0.0720345	0.0932756	0.772276		2368713	3518650	0.0380632	0.0790047	0.481784		1647640	3254849	0.0468442	0.133528	0.35082		3376350	6945176	0.258878	0.478448	0.541078			1735247	3378859	0.121229	0.207145	0.58524		2043000	4370623	0.0723114	0.202556	0.356995		1948953	2998264	0.0691374	0.140948	0.490517		3383645	4606039	0.125104	0.168045
		16.704	1525351	1379918	0.06613	0.0956981	0.691027		2350978	3521027	0.0360041	0.0793293	0.453857		1647087	3262217	0.0467989	0.134182	0.348771		3332299	6863636	0.25392	0.470876	0.53925			1720995	3309577	0.119269	0.200331	0.59536		1980424	4226791	0.0679115	0.192618	0.352571		1931383	3003954	0.0669339	0.141553	0.472854		3400052	4622671	0.127516	0.170592
		16.776	1504265	1380495	0.0627291	0.0958329	0.654568		2342317	3518458	0.0349986	0.0789784	0.443141		1627805	3234330	0.0452177	0.131705	0.343326		3312407	6812302	0.251681	0.466108	0.539963			1696083	3242942	0.115843	0.193778	0.597813		1954833	4157148	0.0661121	0.187806	0.352023		1900955	2947878	0.063118	0.135589	0.46551		3411693	4601802	0.129227	0.167395
		16.848	1472925	1352856	0.0576745	0.0893727	0.645326		2295718	3458357	0.0295884	0.0707692	0.418097		1602530	3186072	0.0431452	0.127418	0.338612		3275175	6709432	0.247491	0.456555	0.542084			1682643	3193603	0.113995	0.188926	0.603382		1891651	3989208	0.0616695	0.176203	0.349991		1870789	2888280	0.059335	0.129251	0.459069		3439781	4628909	0.133356	0.171548
		16.92	1483492	1343305	0.0593788	0.0871403	0.681416		2306192	3485435	0.0308044	0.0744678	0.413661		1570194	3154043	0.0404936	0.124573	0.32506		3271911	6728868	0.247124	0.45836	0.539148			1653234	3154166	0.10995	0.185048	0.594171		1851197	3830573	0.0588251	0.165243	0.355992		1837808	2790249	0.0551989	0.118824	0.464542		3456357	4665749	0.135793	0.177192
		16.992	1486768	1315087	0.0599072	0.0805447	0.743775		2296845	3459510	0.0297192	0.0709267	0.419013		1550005	3106207	0.0388381	0.120323	0.322782		3275732	6779332	0.247554	0.463046	0.534619			1630826	3127391	0.106868	0.182415	0.585853		1809179	3684913	0.0558706	0.155179	0.360041		1773684	2693353	0.0471572	0.108519	0.434553		3447618	4738897	0.134508	0.188397
		17.064	1459196	1282515	0.0554603	0.0729314	0.760444		2289344	3419198	0.0288483	0.0654204	0.440968		1516874	3025780	0.0361214	0.113179	0.319154		3235421	6818958	0.243017	0.466726	0.520684			1602062	3051800	0.102912	0.174981	0.588134		1771151	3572994	0.0531968	0.147446	0.360788		1773669	2681143	0.0471553	0.10722	0.439798		3403694	4726025	0.128051	0.186425
		17.136	1469112	1294359	0.0570596	0.0756998	0.753761		2294208	3415141	0.0294131	0.0648663	0.453441		1509616	2989577	0.0355262	0.109963	0.323076		3209880	6947844	0.240142	0.478696	0.50166			1581202	3038208	0.100043	0.173644	0.576139		1740224	3478854	0.0510222	0.140942	0.362009		1743974	2648974	0.0434313	0.103799	0.418418		3353781	4696362	0.120714	0.181881
		17.208	1412344	1257735	0.0479038	0.0671394	0.713498		2267369	3386120	0.026297	0.0609023	0.43179		1481460	2900504	0.0332174	0.10205	0.325502		3121106	6867243	0.230151	0.471211	0.488426			1563092	3003133	0.0975524	0.170195	0.573181		1690224	3349945	0.0475065	0.132035	0.359802		1751861	2646525	0.0444204	0.103539	0.429023		3311057	4686071	0.114433	0.180305
		17.28	1415821	1272668	0.0484646	0.0706298	0.686178		2280252	3416303	0.0277927	0.065025	0.427416		1467158	2886053	0.0320446	0.100766	0.31801		3062439	6796235	0.223549	0.464616	0.481147			1551390	2991827	0.095943	0.169083	0.567432		1634008	3210566	0.0435537	0.122405	0.355816		1725276	2581508	0.0410865	0.0966236	0.425222		3243309	4627957	0.104474	0.171402
		17.352	1384879	1268724	0.0434742	0.069708	0.623662		2256589	3405708	0.0250454	0.0635778	0.393934		1446559	2809778	0.0303555	0.0939903	0.322964		2969251	6634473	0.213061	0.449594	0.473897			1535357	2965193	0.093738	0.166464	0.563114		1580106	3074292	0.0397637	0.11299	0.351923		1678052	2503599	0.0351642	0.0883376	0.398066		3185904	4544158	0.0960354	0.158565
		17.424	1375254	1274643	0.0419218	0.0710915	0.589689		2270799	3403481	0.0266952	0.0632736	0.421902		1433997	2762815	0.0293254	0.0898184	0.326497		2887593	6446971	0.203871	0.43218	0.471726			1511825	2901046	0.0905016	0.160155	0.565087		1544005	2980058	0.0372253	0.106479	0.349603		1694280	2496479	0.0371993	0.0875803	0.424745		3149019	4460185	0.0906132	0.145701
		17.496	1372562	1268575	0.0414877	0.0696731	0.595461		2279307	3418665	0.027683	0.0653476	0.423627		1423332	2736640	0.0284509	0.0874931	0.325179		2817232	6323745	0.195952	0.420737	0.465736			1502362	2895062	0.0892001	0.159567	0.559014		1517621	2900675	0.0353702	0.100994	0.35022		1675951	2465268	0.0349007	0.0842609	0.414198		3132982	4393206	0.0882557	0.13544
		17.568	1357410	1250145	0.0390439	0.0653654	0.597318		2267997	3421783	0.0263699	0.0657735	0.40092		1403294	2665920	0.0268078	0.0812108	0.330101		2738276	6175381	0.187066	0.406958	0.459669			1485708	2845988	0.0869096	0.154741	0.561647		1472008	2764861	0.032163	0.0916104	0.351084		1673281	2420255	0.0345659	0.0794735	0.434936		3154617	4388646	0.0914361	0.134742
		17.64	1365460	1248582	0.0403422	0.065	0.620649		2259124	3419743	0.0253397	0.0654949	0.386897		1389941	2640153	0.0257128	0.0789218	0.325801		2676960	6026557	0.180165	0.393137	0.458276			1464811	2806518	0.0840356	0.150859	0.557047		1459007	2724765	0.0312488	0.0888401	0.351742		1675007	2405267	0.0347823	0.0778794	0.446617		3135396	4364188	0.0886106	0.130995
		17.712	1361497	1235702	0.0397031	0.0619895	0.64048		2237583	3376334	0.0228388	0.0595656	0.383423		1381302	2591527	0.0250044	0.0746022	0.33517		2602951	5825803	0.171836	0.374493	0.45885			1439183	2767105	0.0805109	0.146983	0.547756		1418992	2616243	0.0284352	0.0813421	0.349575		1653604	2330329	0.0320982	0.0699094	0.45914		3147319	4377114	0.0903633	0.132975
		17.784	1342932	1218743	0.0367088	0.0580256	0.632632		2217929	3338971	0.0205569	0.0544621	0.377454		1367687	2538869	0.023888	0.0699244	0.341626		2518013	5696471	0.162277	0.362482	0.447682			1422621	2760107	0.0782331	0.146295	0.534763		1428550	2669874	0.0291073	0.0850476	0.342247		1682005	2338644	0.0356599	0.0707937	0.503716		3123304	4320086	0.086833	0.124239
		17.856	1340128	1222581	0.0362566	0.0589227	0.615325		2229345	3344688	0.0218824	0.055243	0.396111		1363538	2554842	0.0235478	0.0713433	0.330063		2460381	5583882	0.155791	0.352026	0.442554			1413170	2760961	0.0769333	0.146379	0.525577		1391775	2553685	0.0265215	0.0770199	0.344346		1654228	2297220	0.0321765	0.066388	0.484673		3123729	4303066	0.0868955	0.121632
		17.928	1321103	1194876	0.0331882	0.052447	0.632795		2231858	3334915	0.0221741	0.0539081	0.411332		1345810	2487126	0.0220941	0.0653279	0.338203		2389206	5448333	0.14778	0.339438	0.435368			1397792	2744720	0.0748183	0.144782	0.516767		1369840	2494023	0.0249792	0.0728977	0.34266		1643778	2272106	0.0308659	0.063717	0.484422		3137044	4279441	0.0888529	0.118013
		18	1337920	1208073	0.0359005	0.0555316	0.646488		2222150	3329938	0.021047	0.0532283	0.39541		1345628	2512037	0.0220791	0.0675408	0.326901		2322115	5284132	0.14023	0.324189	0.432555			1391610	2787165	0.0739681	0.148956	0.496577		1383560	2537143	0.0259439	0.075877	0.34192		1666405	2280087	0.0337036	0.0645659	0.522003		3106060	4257498	0.0842981	0.114651
		18.072	1304868	1175446	0.0305698	0.0479055	0.638127		2192109	3295479	0.0175592	0.0485215	0.361885		1321508	2443778	0.0201013	0.0614771	0.326972		2252076	5121210	0.132347	0.309059	0.428227			1385412	2797839	0.0731157	0.150006	0.48742		1333091	2402263	0.0223952	0.0665578	0.336477		1615858	2205952	0.0273646	0.0566812	0.48278		3105081	4239990	0.0841542	0.111969
		18.144	1303651	1178221	0.0303735	0.0485541	0.62556		2189729	3304611	0.0172829	0.0497689	0.347263		1310659	2427955	0.0192117	0.0600715	0.319814		2212008	5011656	0.127838	0.298884	0.427717			1404970	2851921	0.0758055	0.155324	0.488047		1351535	2475716	0.0236921	0.0716328	0.330743		1654779	2229638	0.0322456	0.0592003	0.544685		3072294	4249724	0.0793344	0.11346
		18.216	1295906	1182520	0.0291243	0.0495589	0.587671		2182832	3302329	0.0164821	0.0494572	0.333261		1287054	2385084	0.0172761	0.0562631	0.307059		2169124	4925819	0.123011	0.290913	0.422847			1390409	2789584	0.0738029	0.149194	0.494678		1308851	2347134	0.0206908	0.0627489	0.32974		1623035	2199421	0.0282646	0.0559866	0.504846		3051069	4242267	0.0762143	0.112318
		18.288	1283517	1172244	0.0271262	0.0471571	0.575231		2154015	3249241	0.0131364	0.0422058	0.311247		1280339	2365776	0.0167254	0.0545479	0.306619		2107828	4828837	0.116113	0.281906	0.411885			1372120	2707138	0.0712876	0.141086	0.505278		1307695	2328631	0.0206095	0.0614704	0.335275		1590022	2134754	0.0241245	0.0491089	0.491245		2967483	4164411	0.0639269	0.100391
		18.36	1288095	1168476	0.0278646	0.0462763	0.602134		2170546	3244820	0.0150557	0.0416019	0.361899		1262660	2338990	0.0152757	0.0521684	0.292816		2044040	4725770	0.108934	0.272334	0.400001			1350530	2644789	0.0683183	0.134954	0.506233		1312744	2324333	0.0209645	0.0611735	0.342706		1589977	2117890	0.0241189	0.0473153	0.509747		2972622	4150521	0.0646824	0.0982633
		18.432	1279095	1156832	0.026413	0.0435547	0.606433		2168955	3222764	0.014871	0.0385893	0.385366		1252133	2290283	0.0144125	0.0478415	0.301256		1970832	4581542	0.100695	0.25894	0.388873			1327273	2580292	0.0651197	0.128611	0.506329		1275744	2230385	0.0183629	0.0546824	0.335811		1509239	2009477	0.0139937	0.035785	0.391048		2953005	4127269	0.0617986	0.0947013
		18.504	1270292	1144029	0.0249932	0.0405622	0.616171		2175954	3222857	0.0156836	0.038602	0.406289		1250094	2312889	0.0142453	0.0498497	0.285766		1907015	4453747	0.0935126	0.247072	0.378483			1310780	2555699	0.0628514	0.126193	0.498058		1279952	2272246	0.0186588	0.0575747	0.32408		1536379	2058345	0.0173972	0.0409824	0.424505		2935493	4139988	0.0592243	0.0966497
		18.576	1262835	1141341	0.0237906	0.0399339	0.595748		2164810	3216985	0.0143897	0.0377999	0.380682		1234601	2257690	0.0129749	0.0449462	0.288676		1824452	4226094	0.0842207	0.22593	0.372773			1293795	2510788	0.0605154	0.121776	0.496939		1235232	2167681	0.0155144	0.0503501	0.30813		1484299	1971951	0.010866	0.0317939	0.341763		2932681	4135941	0.0588109	0.0960297
		18.648	1246022	1129778	0.0210789	0.0372312	0.566162		2150276	3167466	0.0127023	0.0310361	0.409276		1239112	2299774	0.0133448	0.0486847	0.274107		1763166	4017639	0.0773233	0.206571	0.374318			1270549	2423639	0.0573183	0.113206	0.50632		1232556	2175168	0.0153262	0.0508674	0.301298		1484902	1979285	0.0109416	0.0325739	0.335901		2908144	4126844	0.0552039	0.0946362
		18.72	1250178	1125683	0.0217492	0.0362741	0.59958		2146007	3150334	0.0122067	0.028696	0.425379		1231832	2251844	0.0127478	0.0444269	0.28694		1701902	3830385	0.0704284	0.189181	0.37228			1240275	2327250	0.0531546	0.103727	0.512449		1211951	2111729	0.0138774	0.0464843	0.29854		1474415	1955695	0.00962645	0.030065	0.320188		2878993	4078873	0.0509187	0.0872874
		18.792	1243375	1114771	0.020652	0.0337235	0.612391		2140932	3169949	0.0116175	0.0313752	0.370275		1225881	2240774	0.0122599	0.0434435	0.282203		1644409	3659314	0.0639579	0.173294	0.369072			1195442	2198558	0.0469886	0.0910707	0.515958		1182309	2011657	0.0117932	0.0395701	0.298033		1428433	1905214	0.00385994	0.0246961	0.156298		2829448	4052105	0.0436354	0.0831868
		18.864	1242732	1124442	0.0205483	0.035984	0.57104		2105879	3121737	0.00754776	0.0247899	0.304469		1213935	2253043	0.0112803	0.0445334	0.2533		1587396	3498539	0.0575414	0.158363	0.363352			1158451	2124198	0.0419012	0.083758	0.500265		1209140	2097246	0.0136798	0.0454836	0.300763		1491961	1967087	0.0118269	0.0312766	0.378138		2811418	4046587	0.0409849	0.0823415
		18.936	1230283	1132785	0.0185405	0.037934	0.488755		2085056	3114049	0.00513018	0.0237398	0.2161		1195730	2177920	0.00978747	0.0378599	0.258518		1531776	3300949	0.0512817	0.140013	0.366264			1129317	2062162	0.0378943	0.0776572	0.487969		1174034	1959066	0.0112114	0.0359365	0.311977		1438288	1882471	0.00509583	0.0222772	0.228746		2784776	4016746	0.0370685	0.0777702
		19.008	1228854	1140615	0.01831	0.0397642	0.460464		2059286	3071845	0.00213824	0.0179751	0.118956		1188731	2150096	0.00921355	0.0353882	0.260357		1480014	3118244	0.0454562	0.123045	0.369426			1110252	2016770	0.0352723	0.0731932	0.481906		1190357	1997336	0.0123591	0.0385806	0.320344		1463899	1882049	0.00830766	0.0222323	0.373675		2800568	4021441	0.03939	0.0784894
		19.08	1220439	1120057	0.0169528	0.034959	0.484933		2060753	3056789	0.00230856	0.0159186	0.145023		1176263	2096715	0.00819117	0.0306462	0.267282		1439525	2966206	0.0408994	0.108926	0.37548			1094740	1969656	0.0331388	0.0685599	0.483356		1168597	1925201	0.0108291	0.0335967	0.322325		1447518	1851460	0.00625335	0.018979	0.329487		2783499	3948849	0.0368808	0.0673689
		19.152	1238034	1125762	0.0197906	0.0362925	0.545307		2065630	3060623	0.00287479	0.0164423	0.174841		1180441	2093676	0.00853377	0.0303762	0.280936		1411668	2875264	0.0377643	0.10048	0.375838			1064089	1885865	0.0289233	0.0603197	0.479501		1149784	1863930	0.00950625	0.0293633	0.323746		1421103	1804512	0.00294069	0.0139859	0.210262		2716567	3850291	0.0270416	0.0522707
		19.224	1234409	1106241	0.0192059	0.0317297	0.605297		2043558	3010269	0.000312197	0.00956438	0.0326417		1165844	2079329	0.00733681	0.0291017	0.252109		1354350	2720811	0.0313135	0.0861362	0.363534			1045200	1853029	0.0263255	0.0570905	0.461119		1171385	1907582	0.0110251	0.0323793	0.340498		1467537	1837902	0.00876389	0.0175371	0.499736		2715115	3851594	0.0268281	0.0524704
		19.296	1241902	1097809	0.0204144	0.0297589	0.685994		2044504	3005048	0.000422029	0.00885124	0.0476803		1147198	2041743	0.00580783	0.0257628	0.225435		1316413	2592928	0.0270439	0.0742599	0.364179			1026310	1810626	0.0237275	0.0529205	0.448361		1141769	1829387	0.00894269	0.0269767	0.331497		1448709	1787952	0.00640271	0.0122246	0.523756		2673513	3787081	0.0207125	0.0425875
		19.368	1229666	1084813	0.018441	0.0267212	0.690124		2041974	2991834	0.000128292	0.00704632	0.018207		1144865	2037291	0.00561653	0.0253673	0.221408		1283455	2448073	0.0233347	0.0608074	0.383747			1011118	1746375	0.0216381	0.0466019	0.464318		1156161	1853924	0.00995464	0.028672	0.34719		1474597	1819109	0.00964928	0.0155383	0.620999		2648600	3726514	0.0170503	0.0333092
		19.44	1197972	1063076	0.0133292	0.0216405	0.61594		2057664	3017926	0.00194993	0.0106103	0.183777		1137025	1978781	0.00497364	0.0201696	0.246591		1274785	2389194	0.0223589	0.0553393	0.404033			993245	1685972	0.01918	0.0406617	0.471697		1113604	1734160	0.00696231	0.0203973	0.341335		1434766	1756988	0.00465415	0.00893141	0.521098		2607275	3654248	0.0109754	0.0222387
		19.512	1202782	1062771	0.014105	0.0215692	0.653942		2053803	2994910	0.00150166	0.00746648	0.20112		1132097	1959400	0.00456955	0.0184479	0.2477		1241956	2285938	0.0186642	0.0457501	0.40796			971876	1607766	0.0162411	0.0329707	0.492591		1107310	1719125	0.00651975	0.0193585	0.336791		1434926	1748178	0.00467421	0.00799442	0.584684		2597183	3630549	0.00949182	0.0186083
		19.584	1181639	1043672	0.010695	0.0171051	0.625253		2040869	2960881	0	0.00281842	0		1121393	1888822	0.00369182	0.0121782	0.303149		1218490	2194913	0.0160232	0.0372967	0.429616			954178	1556206	0.013807	0.0279002	0.494872		1108260	1732246	0.00658655	0.020265	0.325021		1459288	1784845	0.0077294	0.0118942	0.649849		2610529	3647838	0.0114537	0.0212568
		19.656	1173964	1043355	0.00945716	0.017031	0.555291		2049524	2977682	0.00100486	0.00511329	0.196519		1115584	1877946	0.00321548	0.0112121	0.286787		1201064	2125588	0.014062	0.0308586	0.455694			933572	1492337	0.010973	0.0216191	0.507561		1076794	1634462	0.00437406	0.0135089	0.32379		1443917	1753559	0.00580176	0.00856672	0.677243		2598685	3688308	0.00971262	0.0274564
		19.728	1168201	1036204	0.00852768	0.0153595	0.555205		2062186	3005362	0.00247494	0.00889412	0.278266		1117524	1881474	0.00337456	0.0115255	0.292791		1184803	2072172	0.012232	0.0258979	0.472315			909299	1440406	0.0076347	0.0165121	0.46237		1089826	1661177	0.00529039	0.0153547	0.344545		1452213	1782002	0.00684214	0.0115918	0.590258		2555817	3692756	0.0034109	0.0281378
		19.8	1153587	1018566	0.00617069	0.0112369	0.549146		2056710	2971733	0.00183916	0.00430071	0.427643		1095542	1804023	0.00157203	0.00464521	0.338419		1157353	1993160	0.00914263	0.0185601	0.492595			889623	1385173	0.00492861	0.0110804	0.444806		1052151	1536747	0.00264133	0.00675761	0.390867		1437404	1743220	0.00498497	0.00746711	0.66759		2548763	3656988	0.00237395	0.0226585
		19.872	1148896	1005241	0.00541411	0.00812235	0.66657		2068011	2963718	0.00315123	0.00320593	0.982938		1092694	1810474	0.00133849	0.00521828	0.2565		1136307	1920564	0.00677403	0.0118182	0.573186			876364	1345364	0.00310507	0.00716544	0.43334		1059295	1548368	0.00314365	0.00756053	0.415797		1458034	1755155	0.00757214	0.00873646	0.866728		2532614	3573273	0	0.00983409
		19.944	1128894	976647	0.00218813	0.00143888	1.52071		2064207	2940247	0.00270958	0	#DIV/0!		1084940	1763117	0.00070266	0.00101137	0.694759		1113666	1886415	0.00422592	0.00864683	0.488724			868689	1318435	0.00204951	0.00451717	0.453715		1040793	1491594	0.00184271	0.0036379	0.50653		1435394	1722265	0.0047329	0.00523843	0.903496		2557823	3515555	0.00370579	0.000992218
		20.016	1129288	980769	0.00225167	0.00240234	0.937282		2103062	2977307	0.0072207	0.00506206	1.42643		1087032	1760489	0.000874205	0.000777918	1.12378		1102707	1869485	0.00299255	0.00707456	0.423001			853787	1272502	0	0	#DIV/0!		1014586	1438941	0	0	#DIV/0!		1397654	1673011	0	0	#DIV/0!		2588247	3512927	0.0081782	0.000589632
		20.088	1115327	970491	0	0	#DIV/0!		2122437	3011612	0.00947017	0.00974782	0.971517		1076371	1751732	0	0	#DIV/0!		1076117	1793307	0	0	#DIV/0!					-0.117423	-0.125141	0.938328		1045038	1525675	0.00214119	0.00599262	0.357304		1460229	1759152	0.00784741	0.00916157	0.856558		2576159	3509078	0.00640123	0
[truncated: 212 more columns]
