# Supplementary material for: Concerted action of kinesins KIF5B and KIF13B promotes efficient secretory vesicle transport to microtubule plus ends
Source: eLife. 2020 Nov 11;9:e61302. doi: 10.7554/eLife.61302 (PMC7710357; doi:10.7554/eLife.61302)
Supplement: Figure 8—source data 1. [file elife-61302-fig8-data1.xlsx]

## Sheet: Figure 8A
Figure 8A	(Scroll to the right for all conditions (MAP7 >> MAP7D1 >> MAP7D3))
(Intensity)
	MAP7
	Experiment 1
	Cell radius (mm)	MAP7 norm int	Tubulin norm int	MAP7 norm int	Tubulin norm int	MAP7 norm int	Tubulin norm int	MAP7 norm int	Tubulin norm int	MAP7 norm int	Tubulin norm int	MAP7 norm int	Tubulin norm int	MAP7 norm int	Tubulin norm int	MAP7 norm int	Tubulin norm int	MAP7 norm int	Tubulin norm int	MAP7 norm int	Tubulin norm int	MAP7 norm int	Tubulin norm int	MAP7 norm int	Tubulin norm int	MAP7 norm int	Tubulin norm int	MAP7 norm int	Tubulin norm int	MAP7 norm int	Tubulin norm int	MAP7 norm int	Tubulin norm int	MAP7 norm int	Tubulin norm int	MAP7 norm int	Tubulin norm int	MAP7 norm int	Tubulin norm int	MAP7 norm int	Tubulin norm int	MAP7 norm int	Tubulin norm int	MAP7 norm int	Tubulin norm int	MAP7 norm int	Tubulin norm int	MAP7 norm int	Tubulin norm int
	0.072	0.306963	0.321414	0.402646	0	0.940279	0.340042	0.326732	0.29505	0.324239	0.0145027	0.205441	0.100194	0.631149	0.275766	0.698439	0.558104	0.683406	0.516377	0.851596	0.57049	0.77605	0.750758	0.940929	0.885503	0.908935	0.63527	0.675519	0.206848	0.809634	0.479437	0.962435	0.752273	0.241321	0.227993	0.452601	0.297387	0.518488	0.490336	0.735282	0.625852	0.315917	0.257743	0.295444	0.109933	0.332443	0.479437	0.451463	0.240585
	0.144	0.316035	0.315271	0.40922	0.0542227	1	0.334657	0.318598	0.312408	0.327083	0.013044	0.196387	0.111821	0.736761	0.269058	0.736139	0.545566	0.696834	0.522708	0.871684	0.571135	0.866456	0.756476	0.925367	0.868688	0.889233	0.652244	0.533227	0.208817	0.839542	0.53124	0.8999	0.732741	0.223056	0.200869	0.43997	0.319832	0.522936	0.467795	0.615647	0.580897	0.345045	0.281762	0.295887	0.0945117	0.331798	0.53124	0.504374	0.243591
	0.216	0.305404	0.307303	0.418851	0.0894522	0.961129	0.345163	0.322456	0.323754	0.310413	0	0.215138	0.105058	0.784885	0.257793	0.75194	0.535599	0.697212	0.523596	0.896768	0.561965	0.900593	0.757013	0.906318	0.879772	0.863923	0.62032	0.483808	0.215449	0.838118	0.59347	0.891551	0.723402	0.233467	0.210282	0.47686	0.329236	0.495141	0.437377	0.549252	0.562806	0.403835	0.322402	0.311636	0.0836184	0.333216	0.59347	0.567608	0.244522
	0.288	0.315053	0.312366	0.452003	0.0911006	0.847611	0.317585	0.329242	0.340956	0.304904	0.0105019	0.229934	0.0796284	0.807687	0.279596	0.783925	0.538985	0.669639	0.517412	0.865707	0.533922	0.911795	0.735432	0.861049	0.881335	0.861258	0.628883	0.474926	0.204602	0.832421	0.713247	0.880801	0.723162	0.217218	0.197167	0.517535	0.386693	0.453402	0.394918	0.558009	0.590948	0.440149	0.331277	0.317465	0.0517897	0.331884	0.713247	0.592988	0.25986
	0.36	0.321209	0.305953	0.472134	0.067117	0.775891	0.291579	0.342815	0.369911	0.278942	0.00186159	0.236719	0.0810443	0.808247	0.304139	0.753212	0.546359	0.653467	0.510241	0.833549	0.510407	0.85989	0.747569	0.883569	0.876425	0.869758	0.649559	0.469841	0.2055	0.777668	0.768504	0.874198	0.754473	0.185558	0.217718	0.50325	0.410663	0.44346	0.374622	0.540379	0.630211	0.459299	0.35896	0.344313	0.0230416	0.353634	0.768504	0.568148	0.29561
	0.432	0.314945	0.313391	0.461605	0.0515394	0.745718	0.269841	0.382862	0.369783	0.288736	0.0101616	0.252665	0.0596038	0.892215	0.30969	0.785179	0.550971	0.655139	0.514273	0.799138	0.502352	0.795674	0.73838	0.907361	0.891845	0.860184	0.616503	0.448037	0.217522	0.773694	0.762318	0.902901	0.777841	0.173305	0.257145	0.498038	0.386993	0.448021	0.360006	0.563391	0.656431	0.444723	0.327295	0.373124	0.00985725	0.367074	0.762318	0.541081	0.313328
	0.504	0.311217	0.303399	0.455435	0.0516855	0.749603	0.218407	0.384649	0.361038	0.30217	0.0129114	0.236294	0.0749222	0.925613	0.300816	0.842476	0.560125	0.653496	0.512237	0.798329	0.503239	0.792225	0.749656	0.923708	0.896419	0.872656	0.634186	0.44051	0.215933	0.73444	0.743978	0.982543	0.782318	0.144003	0.248416	0.472437	0.355346	0.438778	0.351435	0.589492	0.66553	0.449736	0.309506	0.359148	0	0.36875	0.743978	0.509317	0.29241
	0.576	0.308952	0.305237	0.468657	0.0759731	0.738376	0.185645	0.382975	0.348573	0.294178	0.00515001	0.228894	0.0599901	0.924054	0.293385	0.894744	0.580887	0.659708	0.522803	0.79419	0.51121	0.786964	0.749869	0.916016	0.899549	0.865606	0.642925	0.437489	0.230714	0.734805	0.741354	0.991177	0.80479	0.141092	0.247064	0.463646	0.332495	0.447639	0.351648	0.636059	0.697807	0.459866	0.282652	0.324326	0.0167938	0.376177	0.741354	0.481642	0.287547
	0.648	0.320142	0.304176	0.490442	0.0781515	0.757163	0.156756	0.381129	0.340701	0.274575	0.0120504	0.24371	0.0538542	0.89839	0.296071	0.892411	0.60922	0.647381	0.522655	0.76421	0.519373	0.805576	0.752403	0.901256	0.926146	0.833373	0.628444	0.44627	0.242099	0.73259	0.745431	0.999105	0.790229	0.141048	0.255787	0.447036	0.329776	0.469603	0.360482	0.670932	0.734323	0.466981	0.26269	0.309284	0.0284445	0.391553	0.745431	0.470415	0.288387
	0.72	0.334314	0.313002	0.491016	0.0558175	0.798425	0.150246	0.380203	0.342545	0.28739	0.0192645	0.224421	0.0361603	0.827423	0.306267	0.829464	0.624166	0.635911	0.520964	0.758668	0.534423	0.825927	0.75042	0.887629	0.924761	0.818257	0.637525	0.465587	0.247858	0.754694	0.734664	1	0.814248	0.170165	0.291383	0.448671	0.345778	0.479761	0.356429	0.68736	0.790595	0.445619	0.255458	0.292035	0.0139525	0.378589	0.734664	0.466023	0.283843
	0.792	0.350187	0.322543	0.485351	0.0333074	0.778804	0.128841	0.394817	0.358086	0.303683	0.0197536	0.22007	0.0230892	0.880966	0.328767	0.791909	0.638451	0.642444	0.528856	0.792344	0.547115	0.791761	0.755815	0.888148	0.919685	0.778383	0.619923	0.482569	0.247305	0.725406	0.709534	0.949727	0.800077	0.183934	0.304768	0.451365	0.357122	0.491706	0.35647	0.685685	0.806562	0.42361	0.249697	0.298983	0.0114264	0.376511	0.709534	0.462941	0.2822
	0.864	0.348048	0.320481	0.483145	0.017639	0.731964	0.12628	0.421518	0.368145	0.315382	0.0321869	0.218625	0.0147456	0.907576	0.344362	0.766816	0.646491	0.648435	0.532095	0.813443	0.567588	0.800687	0.778096	0.85642	0.91133	0.786723	0.632254	0.474636	0.24111	0.699177	0.679472	0.948307	0.795534	0.193026	0.307287	0.473984	0.369253	0.482292	0.350245	0.667938	0.801752	0.417508	0.246433	0.301844	0.00578345	0.372544	0.679472	0.463607	0.281752
	0.936	0.341398	0.31363	0.461523	0.00784724	0.651012	0.104612	0.44664	0.385233	0.309504	0.0440325	0.223074	0.0145475	0.900735	0.339056	0.755945	0.646531	0.649599	0.539872	0.842386	0.575428	0.804299	0.797234	0.817576	0.900475	0.792796	0.635805	0.469646	0.245486	0.723946	0.677407	0.941929	0.782473	0.201737	0.317161	0.482675	0.369583	0.484172	0.35814	0.679999	0.771646	0.433965	0.242184	0.30971	0.00383376	0.379519	0.677407	0.476914	0.270321
	1.008	0.331734	0.30516	0.4758	0.00705917	0.662446	0.110979	0.437436	0.383152	0.300502	0.0581864	0.256296	0.00748885	0.864403	0.356143	0.748397	0.641838	0.657079	0.538856	0.844904	0.588795	0.823085	0.833691	0.802255	0.889755	0.759229	0.605141	0.454321	0.246135	0.746133	0.659731	0.966483	0.761018	0.219503	0.321212	0.50584	0.376254	0.474202	0.360316	0.686002	0.774734	0.448971	0.242547	0.319078	0.00801615	0.408353	0.659731	0.468206	0.26427
	1.08	0.328367	0.299733	0.466703	0.00763816	0.672142	0.0951068	0.447725	0.38859	0.30809	0.0521862	0.257994	0.0101422	0.838809	0.351481	0.73641	0.632999	0.656154	0.538352	0.83953	0.593675	0.84492	0.862256	0.809308	0.886471	0.767497	0.610599	0.45619	0.247068	0.787848	0.654575	0.97474	0.759354	0.234854	0.329822	0.527503	0.38796	0.474927	0.373805	0.686702	0.747616	0.447807	0.244193	0.339929	0.0123217	0.441234	0.654575	0.482091	0.2711
	1.152	0.330292	0.303791	0.458668	0.00567756	0.654698	0.0722615	0.447555	0.392215	0.314596	0.0519824	0.2503	0.0122778	0.845536	0.351105	0.753839	0.628378	0.658166	0.533924	0.837455	0.592734	0.901892	0.884512	0.797841	0.876751	0.777435	0.614197	0.453964	0.253277	0.756515	0.642163	0.970511	0.739542	0.255334	0.352068	0.546819	0.407019	0.476327	0.379283	0.650165	0.720228	0.433059	0.236323	0.374644	0.0199072	0.469023	0.642163	0.47551	0.271029
	1.224	0.334066	0.308	0.461194	0.0155638	0.59294	0.0461475	0.451567	0.390025	0.303606	0.0448423	0.233493	0.00745848	0.833738	0.336583	0.792048	0.631833	0.640279	0.524872	0.844471	0.598361	0.932363	0.906338	0.81825	0.879762	0.806882	0.615277	0.449477	0.252416	0.729309	0.668829	0.95508	0.724288	0.254917	0.36588	0.55197	0.418924	0.486433	0.37456	0.588674	0.669059	0.422583	0.219017	0.421739	0.0352418	0.494829	0.668829	0.474941	0.274113
	1.296	0.341775	0.313127	0.489501	0.0330555	0.53071	0.00915665	0.448608	0.387565	0.300285	0.040725	0.219109	0.00831509	0.810975	0.311755	0.806481	0.631126	0.641865	0.53515	0.830667	0.581957	0.947228	0.913034	0.809535	0.861093	0.80611	0.595678	0.455596	0.270011	0.680134	0.646759	0.902039	0.695459	0.260293	0.392465	0.532399	0.423561	0.48689	0.364831	0.546733	0.614276	0.387467	0.206696	0.430314	0.0510659	0.492665	0.646759	0.452762	0.282067
	1.368	0.344342	0.309812	0.493724	0.0561134	0.522927	0.00820727	0.446978	0.393986	0.298109	0.0427082	0.221404	0.00229577	0.782873	0.284856	0.807722	0.643321	0.634659	0.532017	0.83528	0.590056	0.938985	0.920975	0.799749	0.853564	0.813391	0.601923	0.456297	0.269092	0.673857	0.665885	0.849403	0.701386	0.269144	0.401438	0.532145	0.412841	0.493603	0.363763	0.530136	0.57357	0.385164	0.204169	0.426077	0.06137	0.47003	0.665885	0.427296	0.277967
	1.44	0.352408	0.31255	0.508556	0.0885513	0.496579	0.0090918	0.462958	0.412735	0.304249	0.0439537	0.199986	0	0.774397	0.25499	0.78927	0.652444	0.631596	0.536393	0.83995	0.586909	0.922318	0.920428	0.809693	0.85253	0.814976	0.602663	0.462323	0.271461	0.678972	0.647971	0.787562	0.672532	0.278663	0.3941	0.541357	0.407169	0.497633	0.372283	0.515561	0.549189	0.389024	0.19997	0.394696	0.0678068	0.440768	0.647971	0.413248	0.278719
	1.512	0.353482	0.314486	0.502221	0.112712	0.484524	0	0.493701	0.430106	0.308448	0.0427935	0.203088	0.00668824	0.768474	0.248373	0.772385	0.651945	0.633869	0.546834	0.858576	0.571428	0.911994	0.933752	0.816486	0.865088	0.818306	0.603328	0.463704	0.276642	0.666015	0.609335	0.77312	0.659548	0.2765	0.398415	0.562972	0.421694	0.519879	0.397869	0.510908	0.51626	0.391939	0.196393	0.371724	0.0660368	0.421197	0.609335	0.409037	0.274091
	1.584	0.35315	0.317175	0.526358	0.117505	0.480494	0.025412	0.521995	0.443613	0.311223	0.030661	0.207422	0.00557796	0.752379	0.240948	0.776742	0.651828	0.626672	0.541564	0.875937	0.570765	0.915816	0.942759	0.795026	0.88462	0.825517	0.603557	0.462861	0.283521	0.674807	0.585723	0.758344	0.644216	0.287807	0.404942	0.560825	0.425597	0.545019	0.423993	0.522076	0.516972	0.392195	0.2048	0.354629	0.063876	0.406173	0.585723	0.414481	0.269458
	1.656	0.349863	0.317614	0.539147	0.110101	0.483185	0.0430103	0.524624	0.457827	0.318558	0.0229686	0.22021	0.00896266	0.751306	0.2389	0.773194	0.651088	0.641107	0.551835	0.867402	0.541494	0.923531	0.943973	0.803168	0.895815	0.811413	0.600861	0.465174	0.289097	0.67477	0.563423	0.760971	0.624135	0.303845	0.388786	0.537683	0.449286	0.561647	0.439267	0.530786	0.527429	0.405022	0.21361	0.346285	0.0610366	0.39774	0.563423	0.425919	0.266546
	1.728	0.347727	0.3178	0.546353	0.0966487	0.519288	0.0529952	0.505904	0.457112	0.31472	0.0155247	0.240176	0.0135205	0.76755	0.233839	0.770478	0.646843	0.633935	0.546808	0.834051	0.536279	0.945208	0.949016	0.837343	0.908706	0.827662	0.608078	0.461732	0.295485	0.671184	0.546218	0.766447	0.645464	0.32035	0.382328	0.52292	0.445881	0.566329	0.44119	0.519404	0.544873	0.417806	0.22254	0.349742	0.0676966	0.404315	0.546218	0.448665	0.271402
	1.8	0.343334	0.317913	0.53244	0.0773279	0.53791	0.0737118	0.522298	0.451307	0.323182	0.0132906	0.234958	0.0158879	0.776305	0.239464	0.748272	0.644314	0.635419	0.550661	0.787205	0.517323	0.988663	0.959975	0.870223	0.918012	0.829074	0.606038	0.465231	0.302979	0.62318	0.521357	0.736243	0.625778	0.311792	0.398098	0.515259	0.438483	0.561297	0.434198	0.539751	0.605313	0.416819	0.219431	0.355855	0.0724288	0.430824	0.521357	0.477611	0.265274
	1.872	0.346013	0.318198	0.504093	0.0731933	0.574624	0.104642	0.551659	0.446397	0.328599	0.0138194	0.244235	0.0212194	0.836597	0.244064	0.747311	0.646339	0.644189	0.55208	0.766911	0.516336	0.999155	0.979336	0.932493	0.904449	0.836093	0.60848	0.46533	0.30559	0.615888	0.497296	0.729678	0.629257	0.29847	0.408516	0.532521	0.441129	0.561073	0.425239	0.545196	0.644442	0.413034	0.219918	0.368794	0.0787383	0.472416	0.497296	0.515053	0.25863
	1.944	0.352933	0.322855	0.488388	0.0690393	0.636894	0.160201	0.546237	0.437016	0.31811	0.0212721	0.272362	0.0213238	0.820051	0.240735	0.770015	0.655193	0.639834	0.550115	0.756955	0.523733	0.991521	1	0.964299	0.893896	0.83263	0.608308	0.467637	0.31388	0.60622	0.500796	0.70964	0.600703	0.289815	0.411238	0.545923	0.43655	0.559612	0.4199	0.563462	0.662992	0.401575	0.217599	0.382393	0.0906192	0.502691	0.500796	0.522655	0.268089
	2.016	0.359867	0.329227	0.485015	0.0653652	0.69762	0.206882	0.528553	0.431868	0.319164	0.0270125	0.30025	0.0254588	0.801192	0.2406	0.797824	0.659647	0.654768	0.562647	0.730467	0.515708	1	0.995092	0.986214	0.883683	0.833756	0.61523	0.468337	0.316836	0.606542	0.49938	0.71829	0.595096	0.268909	0.413165	0.584679	0.471954	0.579124	0.421453	0.58005	0.657872	0.397391	0.210747	0.400986	0.0942009	0.527001	0.49938	0.528317	0.274664
	2.088	0.375293	0.336942	0.492862	0.0659159	0.678082	0.21366	0.51579	0.428216	0.32343	0.0188719	0.301488	0.0356954	0.748057	0.241492	0.802885	0.674963	0.625069	0.550444	0.743331	0.543144	0.979344	0.979996	0.997294	0.885634	0.829884	0.625468	0.470331	0.31327	0.615042	0.505343	0.732397	0.626455	0.264451	0.430617	0.572431	0.479728	0.614653	0.432145	0.576447	0.676215	0.418296	0.214459	0.408659	0.0927163	0.527887	0.505343	0.545901	0.277507
	2.16	0.386162	0.349016	0.481082	0.0614805	0.641126	0.20871	0.518543	0.431309	0.33832	0.0261339	0.308454	0.0375264	0.738684	0.231974	0.802757	0.675436	0.627933	0.563099	0.741324	0.539517	0.964758	0.97626	0.999468	0.879129	0.825554	0.625546	0.477345	0.311144	0.632612	0.531354	0.720519	0.622402	0.274811	0.453501	0.596329	0.494824	0.636114	0.44468	0.592536	0.686852	0.414616	0.216277	0.40932	0.0996226	0.524021	0.531354	0.556988	0.285279
	2.232	0.390681	0.358847	0.488254	0.0807812	0.614024	0.186637	0.539556	0.431861	0.351789	0.0323554	0.301686	0.0475518	0.75308	0.232408	0.811179	0.66966	0.633066	0.567268	0.756478	0.546495	0.960249	0.960337	1	0.879606	0.832231	0.630143	0.471687	0.306798	0.642834	0.531426	0.715922	0.634902	0.28163	0.469764	0.581546	0.489726	0.637815	0.460413	0.603762	0.706695	0.42221	0.223553	0.393309	0.10059	0.506918	0.531426	0.562501	0.287481
	2.304	0.389311	0.368565	0.470329	0.103696	0.58019	0.17066	0.524835	0.430774	0.369963	0.0381614	0.298322	0.048659	0.779777	0.232451	0.812231	0.677121	0.638568	0.572815	0.757128	0.550024	0.953442	0.948128	0.983255	0.864614	0.820827	0.629314	0.461968	0.309059	0.651658	0.527056	0.704765	0.611906	0.307517	0.489771	0.565251	0.472957	0.632806	0.485639	0.615767	0.703608	0.421823	0.230765	0.377469	0.1001	0.501662	0.527056	0.564769	0.293285
	2.376	0.392301	0.379199	0.444179	0.124777	0.549333	0.159778	0.517395	0.433214	0.370567	0.0444529	0.292217	0.0567603	0.791242	0.243367	0.803726	0.681848	0.634113	0.576668	0.757591	0.566908	0.963482	0.933757	0.956338	0.860214	0.830584	0.63058	0.456414	0.299994	0.655044	0.527086	0.730725	0.646779	0.316294	0.489417	0.549885	0.460222	0.621575	0.492645	0.617242	0.681134	0.426727	0.230871	0.388516	0.0980305	0.478714	0.527086	0.568308	0.293234
	2.448	0.400074	0.383789	0.417761	0.133456	0.532777	0.142917	0.51465	0.439635	0.36204	0.0572737	0.294614	0.0576585	0.800535	0.250661	0.804226	0.692551	0.652341	0.593772	0.743511	0.563021	0.967155	0.920522	0.93044	0.845221	0.838597	0.634328	0.441401	0.292857	0.657455	0.512753	0.742775	0.646541	0.325011	0.471474	0.57498	0.46372	0.613528	0.499301	0.610306	0.659948	0.437912	0.236792	0.402831	0.10602	0.46767	0.512753	0.562781	0.29657
	2.52	0.40355	0.382881	0.42968	0.130827	0.559233	0.136292	0.508495	0.432352	0.363246	0.0691084	0.29616	0.0595898	0.802895	0.264005	0.796176	0.700299	0.658061	0.599864	0.750505	0.565787	0.945046	0.913532	0.890116	0.83244	0.815378	0.626431	0.442902	0.299176	0.650637	0.490159	0.753611	0.65057	0.323977	0.461261	0.58679	0.477777	0.619492	0.501248	0.626482	0.648087	0.412138	0.234037	0.424741	0.109351	0.465824	0.490159	0.564599	0.299442
	2.592	0.402888	0.381944	0.452486	0.120893	0.606458	0.140745	0.511449	0.426718	0.373189	0.0867967	0.290011	0.0706797	0.825548	0.274456	0.793712	0.696796	0.660452	0.608969	0.765289	0.571521	0.943345	0.903116	0.869645	0.823313	0.797792	0.618731	0.436549	0.299925	0.668329	0.502095	0.780182	0.679217	0.328862	0.442015	0.602218	0.483094	0.623335	0.499076	0.610032	0.641576	0.398851	0.234566	0.437894	0.118055	0.459902	0.502095	0.572712	0.307284
	2.664	0.408655	0.3862	0.475056	0.114695	0.597429	0.144273	0.512458	0.423294	0.38209	0.0802276	0.306345	0.0760837	0.840976	0.28445	0.787834	0.68604	0.661073	0.618092	0.762616	0.560186	0.934458	0.913116	0.843487	0.809332	0.79649	0.619496	0.436467	0.302607	0.68067	0.483035	0.78388	0.674162	0.339475	0.424487	0.62369	0.475563	0.647541	0.503873	0.584072	0.633244	0.396069	0.230288	0.430471	0.122306	0.458977	0.483035	0.593237	0.336503
	2.736	0.418013	0.391011	0.472157	0.105849	0.60115	0.155948	0.510363	0.422603	0.372112	0.0739233	0.321708	0.0918364	0.839836	0.2934	0.787606	0.66985	0.662337	0.624714	0.75809	0.554221	0.93108	0.912196	0.81611	0.7952	0.793668	0.60726	0.433004	0.301598	0.694043	0.483007	0.79958	0.701869	0.359719	0.415398	0.623361	0.467264	0.654743	0.49616	0.546052	0.600959	0.399259	0.225822	0.455792	0.139437	0.45704	0.483007	0.610898	0.35884
	2.808	0.430725	0.396317	0.465008	0.099521	0.58323	0.173636	0.508153	0.427109	0.37307	0.0692619	0.330107	0.0952909	0.854505	0.291528	0.779525	0.655065	0.672626	0.635518	0.757984	0.543972	0.918867	0.913993	0.794235	0.785142	0.798206	0.603216	0.435458	0.309686	0.691856	0.455698	0.802501	0.718094	0.379815	0.421335	0.618202	0.469765	0.660694	0.489542	0.55599	0.607681	0.404343	0.220798	0.459918	0.142904	0.468519	0.455698	0.624103	0.382812
	2.88	0.433884	0.403139	0.442583	0.0931707	0.594246	0.194166	0.509361	0.435928	0.380235	0.0763785	0.341185	0.105541	0.862309	0.29404	0.772395	0.649519	0.682512	0.643835	0.755505	0.538377	0.914639	0.91651	0.778353	0.780323	0.797553	0.604477	0.433684	0.320562	0.692187	0.452436	0.801969	0.736052	0.413889	0.416908	0.630494	0.482741	0.66892	0.487116	0.582125	0.618567	0.40735	0.216204	0.468474	0.142088	0.467556	0.452436	0.629697	0.389009
	2.952	0.438622	0.40753	0.447325	0.0890504	0.624655	0.22257	0.498962	0.435487	0.380177	0.0796966	0.324984	0.111301	0.845506	0.308715	0.772092	0.651911	0.689078	0.644704	0.75903	0.546552	0.915022	0.9111	0.779707	0.772282	0.795183	0.608988	0.438385	0.318944	0.697864	0.46923	0.807185	0.757515	0.416131	0.420027	0.640558	0.482081	0.664987	0.487369	0.591401	0.639586	0.402205	0.210843	0.46798	0.157886	0.461232	0.46923	0.619479	0.394058
	3.024	0.450099	0.417542	0.443579	0.0893082	0.658259	0.23605	0.491637	0.434472	0.386234	0.0900454	0.319772	0.115768	0.821036	0.312257	0.766279	0.653654	0.69935	0.6557	0.753325	0.53781	0.918427	0.904808	0.762299	0.764732	0.801344	0.615561	0.444819	0.327023	0.692305	0.4766	0.792083	0.746276	0.435766	0.439588	0.660048	0.505921	0.6473	0.491299	0.607754	0.652184	0.413246	0.211016	0.47841	0.165171	0.47401	0.4766	0.623839	0.400339
	3.096	0.452692	0.427024	0.447006	0.0841359	0.684801	0.272643	0.510522	0.431681	0.39123	0.0974624	0.313558	0.115888	0.808677	0.327938	0.765822	0.652472	0.708802	0.655835	0.772397	0.554955	0.919241	0.892277	0.763059	0.768547	0.800222	0.625062	0.442796	0.326471	0.714166	0.513878	0.788563	0.748946	0.424579	0.431393	0.659243	0.507378	0.639802	0.498186	0.601014	0.671504	0.415411	0.208025	0.465326	0.163401	0.457142	0.513878	0.604983	0.409335
	3.168	0.461845	0.446272	0.450749	0.0845551	0.664903	0.273236	0.529071	0.434632	0.399657	0.105883	0.325199	0.118295	0.788556	0.32507	0.773881	0.653646	0.721512	0.666579	0.768741	0.557368	0.91174	0.878029	0.745055	0.767244	0.80002	0.63441	0.453341	0.329186	0.703525	0.528903	0.778092	0.73879	0.438013	0.445905	0.650073	0.513838	0.638387	0.509493	0.603159	0.674108	0.42378	0.206449	0.462024	0.1641	0.457565	0.528903	0.604546	0.415865
	3.24	0.475097	0.460129	0.452174	0.0846143	0.662025	0.285638	0.550749	0.440085	0.398153	0.100787	0.322704	0.117976	0.769132	0.324051	0.775704	0.644766	0.71909	0.667158	0.776282	0.57861	0.907776	0.867592	0.729781	0.769146	0.797685	0.641393	0.456586	0.322394	0.715141	0.537241	0.771291	0.741272	0.42882	0.450266	0.631087	0.493533	0.641825	0.523154	0.609795	0.669836	0.427361	0.206304	0.464775	0.167528	0.461763	0.537241	0.593478	0.405678
	3.312	0.485401	0.472669	0.456543	0.0865215	0.692701	0.297575	0.570457	0.452093	0.397263	0.0950225	0.306546	0.118962	0.755123	0.327133	0.773379	0.648936	0.73179	0.679047	0.776974	0.584055	0.893839	0.858895	0.727695	0.76659	0.799156	0.651459	0.45836	0.32063	0.72808	0.531504	0.772051	0.742483	0.425607	0.461827	0.653498	0.488921	0.657092	0.535112	0.623981	0.674215	0.431626	0.212604	0.462277	0.1749	0.465502	0.531504	0.593805	0.406427
	3.384	0.498668	0.483489	0.472651	0.0873604	0.701365	0.280329	0.576238	0.463041	0.402363	0.0971976	0.294405	0.120095	0.750941	0.32523	0.769971	0.643342	0.738685	0.69454	0.792643	0.585029	0.880335	0.850333	0.707996	0.771057	0.806346	0.663901	0.462154	0.319223	0.727106	0.518152	0.772338	0.720873	0.421996	0.466957	0.658554	0.496482	0.671716	0.531865	0.632109	0.677217	0.434661	0.217809	0.451305	0.169367	0.479335	0.518152	0.590363	0.405028
	3.456	0.501768	0.486045	0.465097	0.0905597	0.74407	0.303474	0.602295	0.491858	0.404004	0.0955273	0.276976	0.121154	0.722658	0.322615	0.766836	0.635493	0.75399	0.696628	0.830921	0.613493	0.890831	0.857369	0.717977	0.772809	0.814133	0.669946	0.464636	0.32037	0.721544	0.504103	0.790784	0.746842	0.428135	0.47412	0.656701	0.501464	0.663896	0.524692	0.612831	0.658246	0.431477	0.221318	0.447221	0.163888	0.477287	0.504103	0.567193	0.387601
	3.528	0.509855	0.495109	0.457122	0.0970189	0.740758	0.295186	0.593807	0.507735	0.415189	0.0956705	0.277861	0.120153	0.713652	0.319632	0.778652	0.631914	0.757004	0.707619	0.848819	0.598015	0.88765	0.859725	0.716489	0.765543	0.822504	0.677252	0.4703	0.325523	0.717829	0.496384	0.786462	0.721199	0.434131	0.476383	0.657221	0.516966	0.692692	0.516157	0.605644	0.640775	0.43594	0.22942	0.439807	0.162456	0.502346	0.496384	0.567299	0.386969
	3.6	0.511907	0.500645	0.454972	0.106803	0.730513	0.29893	0.631566	0.522582	0.429436	0.108037	0.277022	0.124733	0.674485	0.307023	0.79363	0.631696	0.761596	0.705126	0.873603	0.619021	0.869456	0.86085	0.726716	0.768767	0.829839	0.682988	0.473067	0.321236	0.692911	0.475768	0.794007	0.70373	0.445968	0.482277	0.657023	0.526781	0.718027	0.513642	0.61192	0.640935	0.436763	0.23614	0.447391	0.162603	0.506752	0.475768	0.54999	0.372618
	3.672	0.51188	0.505769	0.436434	0.107271	0.717614	0.290999	0.646293	0.5212	0.440147	0.130929	0.293715	0.137282	0.658727	0.304549	0.786714	0.632767	0.769916	0.721374	0.874945	0.604296	0.857945	0.852005	0.721804	0.760739	0.835364	0.680121	0.473212	0.321441	0.687232	0.480123	0.791021	0.676783	0.443513	0.484263	0.660256	0.528635	0.757578	0.51547	0.625297	0.652881	0.441788	0.24819	0.447176	0.163463	0.513338	0.480123	0.555787	0.37886
	3.744	0.520409	0.513124	0.444969	0.111007	0.729376	0.285903	0.656765	0.52646	0.464535	0.151391	0.296914	0.141406	0.657523	0.289155	0.783448	0.632236	0.776072	0.724221	0.86475	0.608447	0.842892	0.84076	0.726182	0.747771	0.844207	0.686037	0.474821	0.329222	0.669548	0.476059	0.789912	0.671519	0.463351	0.52091	0.660338	0.531969	0.777797	0.521527	0.634159	0.65791	0.44465	0.259402	0.451543	0.176047	0.519393	0.476059	0.556327	0.376039
	3.816	0.538016	0.520201	0.454816	0.118573	0.754797	0.323732	0.672842	0.544441	0.474237	0.157978	0.291074	0.152714	0.653695	0.296774	0.775289	0.625612	0.77512	0.717513	0.870698	0.627123	0.858362	0.844555	0.704475	0.732888	0.837796	0.685003	0.480601	0.330046	0.68768	0.475935	0.779444	0.685045	0.472595	0.535838	0.647753	0.514465	0.766399	0.529903	0.609026	0.643593	0.4508	0.258632	0.463058	0.190859	0.520507	0.475935	0.555466	0.373024
	3.888	0.540739	0.525046	0.454377	0.111434	0.75508	0.29663	0.692644	0.5488	0.495941	0.168443	0.284403	0.155835	0.64628	0.288043	0.769769	0.62238	0.802705	0.732856	0.870389	0.621823	0.821878	0.828007	0.681687	0.721013	0.834609	0.685568	0.47798	0.336106	0.72983	0.499207	0.76733	0.671896	0.51069	0.563757	0.671093	0.548481	0.743939	0.541036	0.59571	0.646489	0.452052	0.264709	0.470097	0.191501	0.539004	0.499207	0.567102	0.384435
	3.96	0.543052	0.531352	0.46404	0.114887	0.730227	0.304062	0.708974	0.55585	0.509378	0.177184	0.270181	0.156883	0.641606	0.293823	0.758333	0.615387	0.79409	0.732203	0.880366	0.632567	0.843722	0.831188	0.662259	0.711394	0.829629	0.690233	0.477053	0.336386	0.779321	0.519896	0.769128	0.657672	0.528516	0.580367	0.662216	0.535141	0.724226	0.553735	0.592916	0.636201	0.457131	0.265605	0.495724	0.190077	0.538858	0.519896	0.577073	0.395866
	4.032	0.549794	0.53642	0.474676	0.120926	0.721697	0.285315	0.696339	0.546307	0.515285	0.181861	0.264394	0.156643	0.652964	0.292083	0.77007	0.617867	0.823177	0.748321	0.886993	0.636066	0.838943	0.822691	0.6493	0.702806	0.8297	0.691836	0.478743	0.348421	0.799763	0.520048	0.77001	0.65544	0.566574	0.611255	0.700212	0.549626	0.71653	0.564352	0.595077	0.636743	0.470712	0.277131	0.51953	0.201387	0.553344	0.520048	0.57002	0.402024
	4.104	0.555221	0.541593	0.485779	0.136513	0.718177	0.284115	0.684058	0.540654	0.530582	0.188566	0.278928	0.15226	0.663028	0.287569	0.777794	0.621515	0.827929	0.754647	0.887437	0.633521	0.851991	0.819637	0.646228	0.69375	0.841071	0.698141	0.471569	0.350945	0.799724	0.533969	0.75846	0.647197	0.593518	0.628176	0.714355	0.552302	0.730508	0.568535	0.611727	0.630725	0.467565	0.28817	0.535747	0.209139	0.55576	0.533969	0.56889	0.406767
	4.176	0.561376	0.549157	0.494858	0.149715	0.731377	0.290734	0.692648	0.539298	0.529631	0.194557	0.282958	0.157343	0.669005	0.281068	0.759772	0.616048	0.837875	0.75039	0.887734	0.640696	0.875259	0.818795	0.650451	0.685665	0.850723	0.706821	0.473632	0.35393	0.793412	0.560452	0.768957	0.660425	0.580657	0.621265	0.719096	0.530954	0.745772	0.578864	0.632742	0.628069	0.478908	0.298985	0.542341	0.208253	0.550283	0.560452	0.580587	0.410274
	4.248	0.567348	0.554516	0.501388	0.157882	0.733948	0.270306	0.708607	0.544457	0.528403	0.201687	0.271929	0.163736	0.674031	0.277159	0.769376	0.619651	0.884906	0.76935	0.867182	0.622865	0.866801	0.801667	0.659624	0.686393	0.860082	0.708561	0.47269	0.361982	0.806561	0.580858	0.742897	0.640828	0.581363	0.617536	0.758179	0.536205	0.760907	0.575015	0.642969	0.617507	0.492154	0.31313	0.532315	0.207321	0.578364	0.580858	0.594044	0.412197
	4.32	0.570614	0.560527	0.503061	0.157083	0.770523	0.29872	0.707043	0.54181	0.530018	0.214179	0.268115	0.165627	0.666044	0.268659	0.747136	0.611707	0.882565	0.758452	0.852522	0.628081	0.888151	0.79134	0.68158	0.68437	0.875096	0.714999	0.477923	0.358232	0.828481	0.605605	0.756101	0.664081	0.567429	0.589642	0.764184	0.52468	0.758636	0.585121	0.645798	0.6166	0.501384	0.322554	0.521418	0.207599	0.569907	0.605605	0.615289	0.41878
	4.392	0.589563	0.56943	0.512294	0.158159	0.816236	0.312581	0.699452	0.534147	0.532686	0.222789	0.261998	0.166279	0.643983	0.270886	0.768183	0.612585	0.90991	0.770687	0.846052	0.61523	0.895506	0.771541	0.697622	0.695941	0.857388	0.706444	0.488314	0.365706	0.843867	0.601917	0.744973	0.654069	0.571637	0.577884	0.815567	0.553731	0.7553	0.581869	0.694858	0.632897	0.504573	0.329261	0.509292	0.203965	0.586596	0.601917	0.624933	0.42239
	4.464	0.609756	0.577525	0.506204	0.154105	0.859792	0.320827	0.692664	0.526518	0.550886	0.247877	0.265843	0.172874	0.627432	0.267647	0.74893	0.602354	0.883244	0.759129	0.838346	0.614896	0.896076	0.753078	0.715745	0.696949	0.873855	0.711465	0.486732	0.368973	0.825704	0.612802	0.744261	0.651273	0.550045	0.56392	0.797817	0.553735	0.754384	0.585943	0.719846	0.643793	0.503762	0.336921	0.512871	0.213417	0.575705	0.612802	0.635926	0.426155
	4.536	0.634609	0.585747	0.508098	0.156392	0.87968	0.318847	0.699571	0.51882	0.571529	0.265082	0.271298	0.182865	0.629133	0.266687	0.74124	0.597987	0.871173	0.758791	0.840618	0.610081	0.897178	0.738866	0.723381	0.695024	0.865503	0.708058	0.490634	0.37474	0.789536	0.598439	0.738953	0.652615	0.527053	0.556028	0.789844	0.569831	0.755252	0.588015	0.728253	0.656265	0.511991	0.342156	0.509369	0.218033	0.577385	0.598439	0.645327	0.435999
	4.608	0.642729	0.591409	0.494774	0.157769	0.877203	0.29729	0.698363	0.511214	0.586054	0.278324	0.283965	0.187561	0.628859	0.263885	0.74599	0.601648	0.883223	0.770453	0.844637	0.607394	0.877289	0.723304	0.730849	0.688489	0.861007	0.697806	0.490735	0.376446	0.787042	0.584852	0.731816	0.643862	0.521478	0.549628	0.792155	0.577436	0.764518	0.59317	0.706762	0.65726	0.518006	0.340948	0.50495	0.229619	0.587318	0.584852	0.649862	0.445323
	4.68	0.64758	0.603926	0.500515	0.175007	0.835974	0.291951	0.690723	0.508881	0.605032	0.302059	0.28169	0.187828	0.625734	0.265452	0.728709	0.602382	0.845499	0.755486	0.845644	0.619854	0.859714	0.725176	0.728123	0.675364	0.855429	0.700888	0.487586	0.383079	0.80071	0.579503	0.739612	0.662433	0.498031	0.546776	0.751908	0.545904	0.77924	0.597603	0.667412	0.648949	0.52858	0.346824	0.509839	0.241025	0.571866	0.579503	0.653011	0.449601
	4.752	0.665085	0.61559	0.503755	0.187398	0.823784	0.277739	0.679924	0.501304	0.616618	0.303016	0.284835	0.191109	0.622183	0.268687	0.746729	0.605302	0.860402	0.769647	0.842711	0.627173	0.831586	0.702723	0.719679	0.66809	0.861939	0.695518	0.489199	0.388051	0.811336	0.560597	0.74093	0.647285	0.516745	0.543699	0.756214	0.542542	0.801226	0.600787	0.676625	0.667496	0.542182	0.348727	0.513094	0.244203	0.587306	0.560597	0.657112	0.450379
	4.824	0.685648	0.63001	0.537625	0.201211	0.796205	0.27733	0.675064	0.498411	0.641153	0.319827	0.272091	0.188156	0.61028	0.271428	0.747829	0.603857	0.855966	0.767776	0.838749	0.644448	0.817762	0.705101	0.725346	0.657645	0.857155	0.699642	0.490931	0.403927	0.822102	0.557195	0.747025	0.652233	0.523064	0.539448	0.731904	0.529694	0.802839	0.610291	0.679309	0.6736	0.542006	0.35308	0.532957	0.252528	0.580635	0.557195	0.666928	0.459607
	4.896	0.708606	0.642615	0.554463	0.199432	0.773521	0.2786	0.663337	0.496972	0.650293	0.317523	0.276938	0.187019	0.598408	0.275332	0.747009	0.602014	0.867865	0.784299	0.837743	0.649381	0.815796	0.703928	0.730338	0.651182	0.854083	0.696406	0.493688	0.407905	0.806491	0.543594	0.742841	0.641877	0.539245	0.545102	0.735333	0.520303	0.809156	0.62088	0.689489	0.692545	0.540237	0.351488	0.542857	0.260619	0.5924	0.543594	0.67088	0.462637
	4.968	0.731056	0.659541	0.563517	0.198481	0.739768	0.266902	0.661266	0.489249	0.647099	0.320163	0.27265	0.1804	0.601901	0.274909	0.752401	0.601381	0.888447	0.796314	0.826899	0.647679	0.791943	0.69231	0.73182	0.648041	0.859333	0.697878	0.500285	0.413132	0.814317	0.556209	0.746075	0.634726	0.563331	0.546389	0.731346	0.524371	0.816734	0.638355	0.701922	0.694141	0.534472	0.346388	0.55317	0.26409	0.602512	0.556209	0.676465	0.47062
	5.04	0.735589	0.672871	0.56272	0.191878	0.701864	0.266181	0.6576	0.487901	0.648351	0.336457	0.289365	0.184605	0.597399	0.278517	0.734208	0.598867	0.878716	0.786361	0.839588	0.668111	0.797569	0.697942	0.723355	0.637596	0.862751	0.705711	0.507591	0.430614	0.791701	0.571858	0.764274	0.662308	0.565402	0.557115	0.700532	0.516737	0.826104	0.659891	0.703284	0.697259	0.529294	0.339559	0.549684	0.266792	0.590723	0.571858	0.678785	0.487876
	5.112	0.749852	0.684084	0.541903	0.185271	0.691293	0.252779	0.647574	0.485178	0.661122	0.339151	0.292193	0.185905	0.603102	0.283554	0.747908	0.598417	0.936603	0.803436	0.825047	0.649961	0.768642	0.687611	0.721451	0.63648	0.862862	0.708222	0.515724	0.429394	0.814073	0.561069	0.759339	0.646279	0.584917	0.570453	0.720801	0.54065	0.860903	0.678669	0.705423	0.683708	0.519887	0.337578	0.542685	0.265018	0.629702	0.561069	0.675528	0.483314
	5.184	0.74921	0.691719	0.527218	0.187146	0.698251	0.255434	0.659084	0.490085	0.676869	0.358398	0.318549	0.197798	0.606832	0.290743	0.74016	0.597948	0.952542	0.802149	0.839161	0.659536	0.773993	0.693618	0.72301	0.635915	0.873529	0.712965	0.525255	0.4408	0.807774	0.553394	0.770899	0.66294	0.580505	0.587947	0.714048	0.547839	0.859645	0.687546	0.714026	0.679928	0.526732	0.338719	0.540432	0.262328	0.633644	0.553394	0.684113	0.491633
	5.256	0.751206	0.698691	0.508995	0.197292	0.731601	0.264839	0.666744	0.494654	0.684634	0.384033	0.326034	0.196328	0.610271	0.289677	0.729789	0.595107	0.955918	0.803321	0.835324	0.658575	0.758394	0.681884	0.719687	0.639982	0.881113	0.715983	0.531971	0.44033	0.82034	0.552844	0.755327	0.653384	0.575974	0.603736	0.726147	0.563581	0.864515	0.700732	0.744976	0.679427	0.52896	0.338798	0.533917	0.258063	0.652685	0.552844	0.682191	0.500163
	5.328	0.752067	0.707382	0.521937	0.214366	0.761655	0.272403	0.681029	0.496912	0.694004	0.41478	0.331723	0.199162	0.611454	0.292876	0.725255	0.598861	0.946479	0.80759	0.835528	0.658815	0.758465	0.684563	0.717889	0.654392	0.889215	0.722633	0.536424	0.444908	0.811737	0.557424	0.75113	0.649599	0.576138	0.617031	0.741434	0.589528	0.860395	0.712566	0.7597	0.686918	0.532135	0.344011	0.533508	0.262751	0.659865	0.557424	0.680131	0.509242
	5.4	0.765705	0.719021	0.543447	0.232799	0.806343	0.301036	0.677109	0.496716	0.691594	0.438525	0.337831	0.197798	0.606205	0.301376	0.71613	0.599018	0.932685	0.802859	0.850508	0.667671	0.76142	0.678466	0.727559	0.666425	0.887486	0.729844	0.534577	0.446996	0.786564	0.550273	0.73675	0.650684	0.579434	0.6121	0.759158	0.60821	0.868066	0.719096	0.779434	0.705306	0.536222	0.351145	0.532784	0.262526	0.653751	0.550273	0.681459	0.517281
	5.472	0.78254	0.729465	0.559039	0.241669	0.791799	0.301309	0.676885	0.496437	0.701089	0.445775	0.334879	0.204387	0.601643	0.312437	0.732167	0.606822	0.959618	0.820133	0.835319	0.65523	0.756053	0.667001	0.747266	0.683604	0.901588	0.735715	0.531178	0.443334	0.787078	0.54073	0.721675	0.632063	0.591006	0.612553	0.786365	0.655312	0.864808	0.730239	0.765018	0.708662	0.536114	0.360225	0.530233	0.268689	0.672811	0.54073	0.693472	0.526769
	5.544	0.797424	0.74527	0.564428	0.239501	0.775139	0.324185	0.680805	0.496847	0.697773	0.447395	0.34725	0.202936	0.591323	0.322802	0.714826	0.607087	0.926649	0.805035	0.867191	0.680977	0.759736	0.666616	0.756843	0.699312	0.89168	0.742559	0.526367	0.447151	0.79653	0.543058	0.733801	0.652492	0.587366	0.601264	0.778576	0.638913	0.878877	0.726933	0.751569	0.700341	0.534527	0.364293	0.541667	0.282582	0.672588	0.543058	0.712989	0.549622
	5.616	0.807302	0.752169	0.562557	0.236513	0.754675	0.310591	0.679751	0.506646	0.694172	0.439571	0.373363	0.215615	0.595853	0.332915	0.727664	0.608401	0.932723	0.821241	0.864569	0.672267	0.738615	0.644339	0.756207	0.702031	0.899905	0.755054	0.532462	0.446707	0.829014	0.547431	0.718801	0.627179	0.598944	0.600328	0.784488	0.637404	0.875975	0.729693	0.760333	0.705949	0.54804	0.374286	0.542851	0.285898	0.699239	0.547431	0.720974	0.57345
	5.688	0.804196	0.762546	0.55213	0.237755	0.735707	0.306996	0.687414	0.513031	0.690243	0.443067	0.381106	0.228691	0.595999	0.33722	0.72052	0.606905	0.933616	0.820465	0.880036	0.684015	0.740939	0.649447	0.770773	0.709475	0.895332	0.758159	0.534422	0.462369	0.842156	0.54882	0.732534	0.636382	0.60183	0.601032	0.760844	0.620306	0.882232	0.734247	0.758103	0.692518	0.554262	0.381102	0.556359	0.297189	0.708351	0.54882	0.724161	0.595961
	5.76	0.820873	0.768348	0.547025	0.232137	0.7308	0.294948	0.696553	0.517818	0.709298	0.444182	0.374831	0.243538	0.597119	0.342497	0.734248	0.610222	0.947238	0.835097	0.882293	0.675237	0.744123	0.644841	0.778526	0.706623	0.906682	0.765764	0.536744	0.4714	0.826763	0.541572	0.718299	0.623111	0.613099	0.612139	0.758406	0.610923	0.87994	0.731761	0.766054	0.687361	0.569776	0.396855	0.55885	0.299755	0.728519	0.541572	0.724265	0.617908
	5.832	0.841181	0.778314	0.548275	0.235848	0.712864	0.289968	0.716773	0.515097	0.723525	0.464483	0.360619	0.25575	0.614726	0.347484	0.743385	0.614774	0.958823	0.83799	0.890881	0.678367	0.729855	0.630846	0.767098	0.703371	0.918215	0.773932	0.543345	0.478677	0.8044	0.540613	0.724206	0.622706	0.619433	0.611024	0.743316	0.588515	0.893886	0.742554	0.775477	0.681412	0.571892	0.407703	0.555886	0.304734	0.735587	0.540613	0.733476	0.630921
	5.904	0.866649	0.79556	0.542826	0.235642	0.695427	0.313959	0.72551	0.508409	0.7225	0.462741	0.348559	0.256968	0.629343	0.357087	0.733098	0.609812	0.961933	0.825646	0.932961	0.711286	0.735673	0.639255	0.770822	0.701208	0.910536	0.778371	0.561752	0.501227	0.806492	0.560316	0.740504	0.635409	0.634649	0.619079	0.724605	0.568032	0.903008	0.749784	0.747312	0.65588	0.571116	0.411788	0.561771	0.31293	0.73939	0.560316	0.742856	0.634381
	5.976	0.881656	0.808637	0.533279	0.235293	0.662444	0.291458	0.732822	0.505251	0.710987	0.466984	0.345845	0.265134	0.632141	0.368414	0.737914	0.618501	0.989374	0.840921	0.935462	0.713009	0.730761	0.627845	0.757152	0.703432	0.939032	0.786105	0.557683	0.519665	0.790456	0.551952	0.723185	0.619563	0.643743	0.62422	0.723161	0.584259	0.903861	0.747963	0.733791	0.650472	0.577815	0.418842	0.551768	0.3071	0.766476	0.551952	0.754652	0.641982
	6.048	0.892275	0.823168	0.534201	0.241459	0.675158	0.311377	0.738607	0.507545	0.691724	0.466372	0.354222	0.26993	0.627706	0.380235	0.727437	0.61668	0.978266	0.837862	0.962054	0.739826	0.741483	0.636839	0.761217	0.714966	0.927791	0.788204	0.571824	0.541241	0.795179	0.558006	0.735202	0.63052	0.655969	0.627917	0.732012	0.577497	0.918726	0.753278	0.702303	0.628133	0.583346	0.425509	0.55586	0.316939	0.763279	0.558006	0.761946	0.639594
	6.12	0.89408	0.834243	0.527301	0.246521	0.65797	0.298435	0.734486	0.508666	0.696937	0.472959	0.358848	0.276587	0.612959	0.387967	0.732823	0.622612	0.995549	0.856731	0.95566	0.734499	0.736378	0.625424	0.76336	0.721269	0.944492	0.790068	0.58223	0.552657	0.783864	0.552512	0.729436	0.625984	0.668168	0.637747	0.762151	0.584852	0.934144	0.764047	0.698255	0.63032	0.592179	0.428699	0.557445	0.321904	0.771618	0.552512	0.762029	0.649402
	6.192	0.897727	0.840105	0.526264	0.253825	0.646385	0.298329	0.73076	0.511164	0.712212	0.482024	0.371898	0.282308	0.609282	0.390804	0.734393	0.623647	1	0.859366	0.964228	0.741949	0.746723	0.63271	0.761361	0.724935	0.947025	0.790337	0.596863	0.568178	0.793288	0.560052	0.735226	0.617802	0.681077	0.647175	0.786999	0.596913	0.931705	0.771226	0.689978	0.622186	0.605847	0.43482	0.557835	0.324196	0.780365	0.560052	0.757158	0.652049
	6.264	0.907588	0.847663	0.540512	0.25969	0.666166	0.321078	0.737621	0.514337	0.718726	0.49429	0.393424	0.284507	0.606026	0.391266	0.735346	0.626142	0.974842	0.852056	0.965331	0.758906	0.747004	0.639418	0.771169	0.74105	0.928636	0.793987	0.615348	0.578892	0.813422	0.568981	0.782173	0.634824	0.694577	0.654205	0.77601	0.583706	0.938826	0.788956	0.69707	0.627141	0.617538	0.440399	0.588661	0.347416	0.776451	0.568981	0.770436	0.658291
	6.336	0.907618	0.856824	0.537984	0.263424	0.631392	0.287115	0.733249	0.514498	0.736662	0.503656	0.407746	0.28565	0.602	0.387726	0.751108	0.631535	0.988703	0.861412	0.944894	0.738954	0.736993	0.628543	0.777675	0.745453	0.942223	0.797335	0.624695	0.574826	0.811383	0.563191	0.776686	0.618025	0.711537	0.664262	0.811922	0.609808	0.934444	0.799621	0.716072	0.636007	0.623294	0.445042	0.58889	0.351363	0.808948	0.563191	0.781406	0.66796
	6.408	0.907163	0.858901	0.546829	0.267819	0.66267	0.331174	0.741587	0.518784	0.742758	0.508094	0.433641	0.292316	0.59167	0.391534	0.750027	0.636156	0.963599	0.856145	0.939328	0.743963	0.749409	0.642191	0.789139	0.76924	0.928989	0.787265	0.648013	0.586232	0.819686	0.577462	0.796932	0.639315	0.716682	0.662597	0.803044	0.604836	0.937721	0.803907	0.725856	0.643264	0.640061	0.453418	0.609985	0.364559	0.800307	0.577462	0.797309	0.671594
	6.48	0.905167	0.858652	0.542118	0.273202	0.647574	0.331013	0.752778	0.524343	0.759484	0.519884	0.418195	0.28895	0.595695	0.38262	0.763818	0.640471	0.96378	0.852125	0.932051	0.744123	0.741722	0.63471	0.789864	0.786395	0.925447	0.792939	0.653004	0.576901	0.829648	0.579002	0.764714	0.633605	0.723132	0.663817	0.824845	0.612511	0.934876	0.815873	0.754092	0.646719	0.652237	0.462359	0.612296	0.376038	0.801314	0.579002	0.823985	0.688518
	6.552	0.905393	0.861599	0.543577	0.279783	0.671281	0.354559	0.769264	0.5338	0.764334	0.526675	0.421901	0.296017	0.604532	0.380685	0.783431	0.648163	0.957038	0.851516	0.933349	0.753546	0.747268	0.636619	0.792175	0.806018	0.928313	0.788663	0.66387	0.585704	0.84102	0.586026	0.75954	0.63084	0.732305	0.664893	0.850172	0.625926	0.947031	0.817029	0.781624	0.66708	0.662299	0.471863	0.614536	0.390282	0.803537	0.586026	0.849585	0.705066
	6.624	0.918269	0.869115	0.549112	0.282712	0.674496	0.370298	0.785119	0.54176	0.776564	0.537343	0.412146	0.29737	0.62478	0.386497	0.795462	0.664751	0.947738	0.855	0.92458	0.760345	0.753226	0.640705	0.801419	0.832176	0.931783	0.795483	0.658755	0.590767	0.840479	0.587079	0.747155	0.643799	0.751182	0.680794	0.871805	0.655197	0.950422	0.818734	0.768746	0.67285	0.669791	0.481229	0.613144	0.402416	0.811419	0.587079	0.870938	0.724303
	6.696	0.928405	0.87995	0.557527	0.286387	0.671551	0.344376	0.793812	0.54602	0.796228	0.565972	0.402503	0.302514	0.64273	0.396706	0.804076	0.671978	0.943445	0.861354	0.913655	0.758763	0.740297	0.640529	0.822361	0.856317	0.94528	0.794718	0.667184	0.604936	0.840161	0.583386	0.750813	0.649775	0.757297	0.69266	0.892178	0.686314	0.941576	0.818667	0.750564	0.673372	0.669998	0.483324	0.614021	0.408202	0.839646	0.583386	0.885972	0.748809
	6.768	0.955257	0.897926	0.552227	0.293768	0.739207	0.413153	0.819976	0.550021	0.804398	0.575157	0.41116	0.313114	0.657404	0.403569	0.804358	0.673684	0.902343	0.847988	0.935247	0.800243	0.753722	0.642929	0.835027	0.88082	0.937574	0.796428	0.683487	0.624937	0.844282	0.614072	0.767646	0.652344	0.7601	0.709291	0.885951	0.686053	0.940712	0.822697	0.750012	0.689128	0.66998	0.492157	0.617395	0.41931	0.823041	0.614072	0.893546	0.767577
	6.84	0.969782	0.918735	0.541785	0.294442	0.695322	0.379241	0.815638	0.552931	0.826582	0.5932	0.414116	0.316568	0.651197	0.405491	0.816031	0.685782	0.896179	0.855131	0.925787	0.79971	0.749617	0.629537	0.840116	0.905516	0.944944	0.802967	0.706039	0.637281	0.837668	0.609494	0.765422	0.654233	0.759522	0.719083	0.927329	0.72589	0.938637	0.821012	0.765499	0.713559	0.666394	0.498655	0.630528	0.424426	0.846715	0.609494	0.906328	0.794178
	6.912	0.984161	0.936534	0.542528	0.302135	0.710665	0.404502	0.828003	0.550323	0.835343	0.609181	0.429136	0.323627	0.643851	0.410483	0.82239	0.690531	0.873009	0.849969	0.940229	0.825206	0.759721	0.628851	0.852501	0.926163	0.94127	0.803304	0.732963	0.65306	0.855097	0.634636	0.770273	0.653862	0.743525	0.724434	0.951657	0.750567	0.946016	0.817167	0.780985	0.738342	0.665096	0.506667	0.649464	0.424153	0.852212	0.634636	0.908791	0.809
	6.984	0.989156	0.951743	0.554517	0.308625	0.712857	0.402056	0.817152	0.5481	0.858995	0.636526	0.441512	0.329389	0.642594	0.418206	0.836028	0.706728	0.857149	0.862089	0.941123	0.835539	0.755453	0.616133	0.858969	0.947448	0.939024	0.801818	0.760212	0.674708	0.859612	0.640789	0.766104	0.657648	0.742109	0.729252	0.979267	0.791309	0.961288	0.820499	0.789655	0.756519	0.666489	0.518016	0.670499	0.431953	0.871927	0.640789	0.911188	0.81677
	7.056	0.982806	0.961509	0.562784	0.32008	0.71587	0.39067	0.805583	0.548659	0.881306	0.65271	0.438828	0.332908	0.645244	0.421356	0.851248	0.719021	0.840574	0.864825	0.944821	0.847969	0.754807	0.604907	0.874357	0.967968	0.942043	0.807969	0.771097	0.693096	0.86794	0.650304	0.767882	0.663085	0.757861	0.729898	1	0.816375	0.966426	0.821688	0.804484	0.770276	0.677463	0.528543	0.686619	0.449488	0.881847	0.650304	0.908031	0.827307
	7.128	0.987935	0.970649	0.574799	0.341557	0.754505	0.443818	0.819225	0.561251	0.876521	0.654464	0.447414	0.343559	0.651197	0.431116	0.853283	0.731981	0.808262	0.858218	0.962446	0.879384	0.769716	0.614522	0.888621	0.981723	0.924459	0.80362	0.794059	0.716644	0.877067	0.686332	0.788003	0.674056	0.750963	0.733818	0.968129	0.823921	0.972446	0.829308	0.796797	0.76348	0.700561	0.546413	0.693967	0.457485	0.86002	0.686332	0.919971	0.835863
	7.2	0.991228	0.977066	0.576456	0.35448	0.733986	0.411811	0.810942	0.56675	0.910414	0.687613	0.464888	0.352448	0.656954	0.431609	0.878309	0.74359	0.81279	0.866714	0.977986	0.88075	0.749561	0.594736	0.90502	0.984906	0.920156	0.812457	0.810059	0.732727	0.869447	0.684936	0.791317	0.676324	0.769625	0.7493	0.959724	0.833298	0.966923	0.833865	0.801728	0.765544	0.70888	0.558849	0.69537	0.46443	0.871694	0.684936	0.93824	0.834904
	7.272	1	0.986092	0.578134	0.364635	0.767437	0.452942	0.8248	0.576043	0.897213	0.708165	0.486152	0.367217	0.655634	0.446855	0.872769	0.751859	0.793742	0.865121	0.998008	0.90258	0.744659	0.595432	0.931107	0.993937	0.910147	0.80902	0.832179	0.761876	0.881175	0.71087	0.803963	0.692879	0.778892	0.762616	0.94953	0.842205	0.966225	0.852668	0.79952	0.765494	0.730355	0.573257	0.715508	0.478851	0.869131	0.71087	0.964228	0.843668
	7.344	0.994579	0.993778	0.573594	0.372607	0.744169	0.430056	0.823553	0.584094	0.906899	0.738014	0.500337	0.387094	0.657257	0.455532	0.881774	0.769551	0.79322	0.881718	0.996496	0.902901	0.740483	0.586788	0.954949	0.99937	0.895318	0.808451	0.842041	0.786024	0.882334	0.702917	0.802379	0.703124	0.784232	0.767127	0.956014	0.848442	0.959694	0.864195	0.804343	0.778426	0.726184	0.587428	0.718986	0.487598	0.897322	0.702917	0.982852	0.857209
	7.416	0.990384	1	0.57653	0.383435	0.747523	0.458075	0.825567	0.589539	0.905618	0.764489	0.514669	0.402582	0.660956	0.462811	0.890408	0.775186	0.772503	0.877692	0.998281	0.917001	0.729312	0.583309	0.97847	0.999036	0.885049	0.807538	0.849752	0.812322	0.914169	0.727892	0.813203	0.715805	0.78225	0.768614	0.965023	0.868067	0.975494	0.880718	0.80949	0.784154	0.732329	0.600913	0.726926	0.494753	0.901422	0.727892	0.985721	0.85906
	7.488	0.97857	0.998124	0.583462	0.397761	0.798867	0.495203	0.825817	0.597948	0.902898	0.782337	0.553727	0.42326	0.673059	0.477612	0.897732	0.785423	0.762404	0.88167	0.996093	0.925754	0.732771	0.583982	0.985986	1	0.87089	0.805694	0.873346	0.840533	0.945531	0.771924	0.835204	0.736564	0.781654	0.770395	0.971717	0.878179	0.98754	0.901316	0.81869	0.79635	0.736525	0.613708	0.726252	0.504081	0.906784	0.771924	0.996589	0.862303
	7.56	0.954709	0.99694	0.602329	0.420437	0.782432	0.46054	0.823121	0.603408	0.923237	0.801146	0.585021	0.440019	0.6922	0.490087	0.908796	0.804472	0.757243	0.896672	0.983323	0.919641	0.708949	0.566662	0.995894	0.999636	0.860593	0.81283	0.883339	0.866121	0.962202	0.789595	0.815558	0.721686	0.805444	0.768867	0.98812	0.910481	1	0.9247	0.83464	0.810863	0.750758	0.626777	0.724347	0.514686	0.933877	0.789595	0.997863	0.875086
	7.632	0.949764	0.994529	0.617544	0.432854	0.847537	0.532059	0.836426	0.610744	0.917243	0.814424	0.621421	0.465237	0.709409	0.523091	0.912488	0.805825	0.74745	0.885778	0.969715	0.938541	0.732671	0.584812	0.986977	0.992092	0.860926	0.807488	0.937326	0.888466	0.999966	0.857621	0.849976	0.752053	0.801973	0.777609	0.94359	0.901983	0.991097	0.934068	0.850155	0.808647	0.767598	0.644055	0.747307	0.53088	0.924595	0.857621	1	0.877685
	7.704	0.933085	0.987808	0.620491	0.447045	0.817989	0.514919	0.841705	0.620883	0.933194	0.829773	0.641118	0.480753	0.723179	0.542144	0.932588	0.828339	0.75196	0.907934	0.963392	0.939785	0.71878	0.579457	0.976711	0.981106	0.85463	0.813188	0.980722	0.901603	1	0.873753	0.842202	0.750883	0.832536	0.789751	0.954092	0.928876	0.973086	0.942092	0.893666	0.834067	0.78022	0.649353	0.747478	0.533044	0.951467	0.873753	0.992253	0.886385
	7.776	0.922115	0.980355	0.631991	0.460579	0.853289	0.551929	0.844604	0.62875	0.926065	0.840005	0.681164	0.496447	0.741103	0.575172	0.935816	0.830055	0.750391	0.898357	0.961613	0.950336	0.706513	0.575338	0.96323	0.97763	0.860038	0.813869	1	0.898771	0.989039	0.900396	0.861313	0.774769	0.836386	0.799626	0.924242	0.920622	0.954015	0.950395	0.93812	0.857345	0.793896	0.655421	0.7662	0.54501	0.941833	0.900396	0.985199	0.88463
	7.848	0.910947	0.974631	0.64499	0.466863	0.852935	0.546433	0.853943	0.641263	0.919881	0.852507	0.679344	0.508704	0.757402	0.599716	0.939766	0.845808	0.751385	0.902869	0.962827	0.954403	0.712866	0.576918	0.959642	0.978331	0.857755	0.814235	0.999637	0.90149	0.98609	0.909073	0.879266	0.78623	0.844917	0.805756	0.931958	0.931041	0.9329	0.950713	0.956427	0.862641	0.800874	0.656643	0.774985	0.555332	0.96413	0.909073	0.98289	0.894188
	7.92	0.898237	0.970398	0.66394	0.474063	0.821489	0.498767	0.855963	0.650636	0.936139	0.861401	0.67942	0.522305	0.804005	0.634196	0.946464	0.869285	0.750579	0.915138	0.975664	0.956387	0.708325	0.566422	0.965201	0.983551	0.860239	0.812433	0.973277	0.898474	0.975124	0.901232	0.878506	0.781294	0.858398	0.811542	0.947866	0.95699	0.917685	0.951631	0.974039	0.878578	0.803149	0.658067	0.781234	0.569475	1	0.901232	0.973959	0.909462
	7.992	0.879036	0.95728	0.691066	0.48506	0.870429	0.579562	0.857291	0.657589	0.930336	0.866294	0.704951	0.537842	0.831814	0.644326	0.95443	0.867528	0.742765	0.886464	0.976149	0.953295	0.701063	0.56363	0.956872	0.990808	0.884486	0.830891	0.945401	0.881576	0.967639	0.91368	0.934543	0.827863	0.842679	0.813154	0.916965	0.936588	0.927329	0.958331	0.977204	0.887548	0.809894	0.671061	0.808716	0.585812	0.983539	0.91368	0.941849	0.897799
	8.064	0.851932	0.950266	0.676162	0.48393	0.831721	0.545256	0.870641	0.663251	0.93555	0.861568	0.694716	0.555731	0.866058	0.663582	0.974914	0.89979	0.736977	0.904852	0.975274	0.949951	0.696469	0.5544	0.965344	0.989267	0.885023	0.828367	0.918609	0.884168	0.980292	0.922267	0.925841	0.81976	0.85063	0.811913	0.963845	0.97949	0.910302	0.945924	0.982306	0.900027	0.810561	0.675122	0.826607	0.599417	0.997947	0.922267	0.926794	0.906463
	8.136	0.831019	0.942698	0.663046	0.488547	0.840482	0.600587	0.878907	0.668686	0.927298	0.857695	0.712286	0.579474	0.881674	0.682849	0.992549	0.911853	0.726095	0.893395	0.963431	0.950247	0.698338	0.550274	0.954805	0.993004	0.885476	0.833863	0.905647	0.88433	0.969738	0.923461	0.947376	0.852513	0.850056	0.819742	0.953624	0.979839	0.909037	0.951916	0.976331	0.919692	0.817197	0.691096	0.854591	0.617271	0.976851	0.923461	0.911918	0.896743
	8.208	0.817076	0.947169	0.650899	0.492313	0.82851	0.600692	0.888054	0.680808	0.93124	0.86086	0.711848	0.591696	0.877457	0.691705	0.998705	0.936295	0.720503	0.901976	0.981443	0.962261	0.695197	0.548205	0.951826	0.988216	0.891545	0.84847	0.902016	0.889917	0.960995	0.932552	0.938281	0.8546	0.873722	0.837721	0.946833	0.995917	0.905297	0.946828	0.984708	0.933186	0.826341	0.704126	0.864378	0.634829	0.982501	0.932552	0.909203	0.901306
	8.28	0.803316	0.949575	0.64259	0.494516	0.824882	0.609873	0.884119	0.685902	0.928735	0.862236	0.718367	0.610686	0.875524	0.709392	0.997931	0.953468	0.708914	0.909438	0.988932	0.969184	0.689963	0.546159	0.940727	0.984223	0.890084	0.855453	0.877885	0.897485	0.959844	0.938906	0.93152	0.874169	0.871358	0.835766	0.911494	1	0.906906	0.954631	0.989212	0.946404	0.842798	0.716864	0.872548	0.648064	0.980133	0.938906	0.904552	0.898262
	8.352	0.787676	0.946637	0.645402	0.505547	0.866687	0.662518	0.883445	0.688667	0.936593	0.868103	0.731837	0.631576	0.877616	0.725617	0.987387	0.965941	0.695929	0.895839	0.990403	0.983581	0.694309	0.548628	0.92579	0.973968	0.899034	0.872323	0.881963	0.903229	0.946084	0.943564	0.941855	0.90459	0.873413	0.84596	0.860137	0.970188	0.908055	0.96472	0.999856	0.968465	0.855622	0.734988	0.881546	0.663357	0.957575	0.943564	0.907317	0.901193
	8.424	0.773678	0.943282	0.64118	0.510963	0.840314	0.621114	0.891849	0.695979	0.95291	0.872129	0.756212	0.649117	0.888687	0.730778	0.983744	0.986735	0.687739	0.921533	1	0.99687	0.69287	0.55076	0.923143	0.968522	0.890763	0.895718	0.866702	0.913335	0.938977	0.95083	0.928971	0.901528	0.879972	0.839212	0.854324	0.973241	0.894181	0.970848	1	0.97423	0.852366	0.744875	0.889746	0.681679	0.966307	0.95083	0.913179	0.910598
	8.496	0.767178	0.936234	0.647697	0.530364	0.872268	0.668565	0.898372	0.699715	0.962718	0.868156	0.799515	0.676733	0.907483	0.767546	0.980408	0.984891	0.677441	0.9134	0.989938	1	0.690898	0.552609	0.890967	0.964097	0.896714	0.908003	0.877797	0.910291	0.929284	0.962107	0.937945	0.927415	0.880703	0.848713	0.837067	0.958405	0.880356	0.979337	0.988504	0.975038	0.853959	0.761711	0.91462	0.697074	0.934557	0.962107	0.922967	0.919608
	8.568	0.754516	0.931041	0.648921	0.539072	0.86446	0.651779	0.901718	0.706571	0.972016	0.871966	0.817171	0.69708	0.917184	0.777539	0.982787	0.9968	0.664499	0.926977	0.988615	0.998763	0.686935	0.556405	0.865925	0.958586	0.899777	0.922232	0.885628	0.922192	0.933989	0.974086	0.937355	0.928425	0.878274	0.844597	0.832172	0.958068	0.879002	0.979084	0.977394	0.961564	0.857775	0.772808	0.920079	0.710908	0.933127	0.974086	0.914245	0.927456
	8.64	0.74027	0.9281	0.670955	0.561528	0.862778	0.664384	0.895429	0.712704	0.980138	0.886519	0.833058	0.710259	0.928485	0.797714	0.987791	0.994947	0.653256	0.941576	0.980604	0.985035	0.674103	0.549575	0.856854	0.962077	0.912821	0.944101	0.887711	0.926594	0.933464	0.966537	0.956064	0.953568	0.866603	0.848912	0.81421	0.970875	0.882422	0.977601	0.974023	0.959253	0.874059	0.784219	0.926329	0.727898	0.918767	0.966537	0.906572	0.938168
	8.712	0.723591	0.923795	0.681381	0.576365	0.855333	0.664635	0.904443	0.726344	1	0.90546	0.834549	0.720448	0.93268	0.804274	0.999822	1	0.645684	0.943163	0.976598	0.968532	0.667771	0.541266	0.851315	0.96948	0.921195	0.960242	0.886366	0.932373	0.928075	0.967318	0.954671	0.964482	0.860533	0.84759	0.795989	0.963692	0.888683	0.967265	0.970631	0.950334	0.881053	0.793314	0.921853	0.738487	0.901021	0.967318	0.895799	0.943919
	8.784	0.709434	0.929763	0.690113	0.586044	0.835183	0.639126	0.927101	0.744045	0.997669	0.907736	0.855999	0.733092	0.92569	0.795809	1	0.988889	0.655894	0.976242	0.9689	0.946059	0.661194	0.535809	0.859398	0.977268	0.943059	0.97778	0.878311	0.937368	0.920192	0.959336	0.949511	0.965144	0.864774	0.846916	0.788859	0.946596	0.885251	0.966335	0.96499	0.940733	0.884948	0.799779	0.919022	0.757234	0.890714	0.959336	0.890762	0.954589
	8.856	0.694064	0.929168	0.719141	0.610417	0.871465	0.684122	0.953935	0.767992	0.974763	0.911622	0.875513	0.755194	0.918313	0.812823	0.987751	0.972745	0.658551	0.964115	0.924991	0.903847	0.676163	0.549695	0.84771	0.970292	0.971508	0.991474	0.885563	0.947513	0.911659	0.96518	0.948786	0.98542	0.851555	0.851194	0.774974	0.921982	0.892067	0.963207	0.934869	0.924195	0.88059	0.81125	0.936833	0.774678	0.855396	0.96518	0.87901	0.96289
	8.928	0.678608	0.934365	0.708391	0.609868	0.875901	0.660949	0.955945	0.780837	0.970881	0.906738	0.883861	0.772155	0.91232	0.808385	0.993762	0.95914	0.661234	0.98454	0.914627	0.880989	0.665586	0.540059	0.851359	0.968242	0.979424	0.99416	0.874441	0.945823	0.895291	0.962236	0.919179	0.985865	0.865847	0.852019	0.761134	0.904883	0.876077	0.971024	0.937832	0.935999	0.885518	0.820151	0.931338	0.780333	0.854077	0.962236	0.874389	0.96557
	9	0.668924	0.934631	0.72499	0.634999	0.910343	0.690088	0.964461	0.800125	0.971726	0.914367	0.908981	0.78718	0.897722	0.829925	0.987346	0.941563	0.657564	0.987824	0.880102	0.841005	0.663848	0.551627	0.83342	0.958239	1	1	0.875024	0.954689	0.902727	0.971153	0.915201	0.993904	0.869968	0.861208	0.748817	0.892262	0.869499	0.970658	0.917197	0.923936	0.897178	0.83342	0.941047	0.801988	0.851983	0.971153	0.873535	0.968331
	9.072	0.653444	0.935383	0.720225	0.629742	0.927317	0.679377	0.972732	0.812977	0.983432	0.924221	0.93071	0.803834	0.880519	0.834998	0.984265	0.920303	0.652755	0.992933	0.860912	0.825764	0.646557	0.545452	0.828677	0.951299	0.971456	0.995128	0.860804	0.946647	0.887781	0.961503	0.894309	0.992568	0.894936	0.868241	0.729494	0.883406	0.843368	0.965746	0.913437	0.926887	0.909096	0.850274	0.939297	0.809662	0.852268	0.961503	0.866068	0.976578
	9.144	0.648698	0.941969	0.73964	0.649066	0.940875	0.696694	0.991558	0.837446	0.977415	0.922371	0.955316	0.828441	0.884698	0.856027	0.956264	0.900149	0.654347	1	0.834365	0.796271	0.646385	0.55303	0.80159	0.932775	0.979993	0.997656	0.851129	0.953934	0.871743	0.970854	0.896984	0.982432	0.894385	0.876419	0.716312	0.866567	0.830851	0.965098	0.898857	0.925413	0.914354	0.866239	0.954772	0.827519	0.854734	0.970854	0.862695	0.989991
	9.216	0.62579	0.939282	0.759703	0.673245	0.96607	0.740375	0.985045	0.842852	0.972397	0.938783	0.950121	0.851404	0.894073	0.880136	0.942365	0.888855	0.640197	0.985275	0.800606	0.768217	0.635453	0.542468	0.778049	0.912715	0.942821	0.983529	0.85262	0.9574	0.849217	0.962266	0.909595	0.996953	0.902258	0.890031	0.706711	0.851062	0.816214	0.969031	0.895683	0.916849	0.937618	0.889514	0.963338	0.845012	0.828806	0.962266	0.852239	0.995837
	9.288	0.608817	0.938617	0.759088	0.674159	0.923129	0.714729	0.995466	0.855628	0.970816	0.938365	0.958799	0.866252	0.891012	0.881844	0.928799	0.882439	0.629566	0.993621	0.780569	0.750942	0.612906	0.52866	0.774637	0.912463	0.926909	0.984117	0.843814	0.95472	0.836581	0.949663	0.897174	0.992201	0.922948	0.901673	0.707406	0.857398	0.822161	0.95975	0.90242	0.93137	0.949729	0.908197	0.960921	0.852193	0.836006	0.949663	0.84285	1
	9.36	0.595015	0.936993	0.784724	0.703964	0.938876	0.761188	1	0.85929	0.943479	0.928395	0.96355	0.896183	0.907999	0.9131	0.908906	0.876151	0.620288	0.974953	0.728551	0.714735	0.611449	0.521451	0.729389	0.896092	0.93469	0.981472	0.849269	0.963485	0.82473	0.95285	0.905865	0.999291	0.929983	0.922759	0.712992	0.873859	0.827723	0.965648	0.882258	0.934605	0.969665	0.933351	0.971717	0.871743	0.818366	0.95285	0.83551	0.996461
	9.432	0.586162	0.936126	0.782845	0.699294	0.925999	0.753895	0.992171	0.862862	0.931991	0.928006	0.986883	0.905351	0.928287	0.93184	0.896306	0.855041	0.61208	0.974814	0.700414	0.691412	0.591855	0.50645	0.711312	0.890013	0.915123	0.982131	0.844795	0.966717	0.80961	0.934593	0.880417	0.994491	0.959557	0.936652	0.716147	0.878002	0.850189	0.969647	0.88086	0.946983	0.992323	0.945104	0.970488	0.882861	0.817396	0.934593	0.81992	0.988024
	9.504	0.575455	0.931727	0.801501	0.721046	0.933726	0.770586	0.984412	0.86345	0.901603	0.919636	1	0.930759	0.928707	0.94494	0.882233	0.834557	0.593659	0.952449	0.66371	0.666448	0.5784	0.499688	0.68828	0.87848	0.909376	0.975871	0.846534	0.97663	0.796632	0.947611	0.890593	0.996676	0.970001	0.956212	0.707133	0.877271	0.854967	0.98059	0.869943	0.94171	1	0.954654	0.972617	0.89977	0.80458	0.947611	0.797468	0.97866
	9.576	0.561258	0.92531	0.823069	0.740081	0.958793	0.793948	0.976867	0.867816	0.879925	0.91798	0.981511	0.94644	0.922423	0.950001	0.868792	0.806559	0.577665	0.925754	0.627122	0.643543	0.56332	0.487779	0.676038	0.868686	0.891012	0.972519	0.852204	0.981154	0.775038	0.950847	0.884758	1	0.985613	0.965947	0.698355	0.884044	0.858719	0.989831	0.862333	0.945505	0.99178	0.960696	0.974077	0.911438	0.797885	0.950847	0.776757	0.96966
	9.648	0.55014	0.923206	0.83088	0.759219	0.945914	0.776879	0.967055	0.876048	0.888324	0.923146	0.972861	0.94674	0.91614	0.956265	0.833726	0.77225	0.566811	0.914617	0.602785	0.625524	0.550638	0.478823	0.670695	0.8686	0.871057	0.976492	0.847285	0.977364	0.75948	0.942814	0.864429	0.987891	1	0.975037	0.684376	0.867441	0.845507	1	0.867082	0.960461	0.971085	0.961517	0.976827	0.918799	0.799282	0.942814	0.760783	0.958641
	9.72	0.549134	0.92831	0.860287	0.810329	0.961549	0.820592	0.972782	0.886846	0.872823	0.925239	0.949555	0.966209	0.914432	0.976747	0.800357	0.749714	0.545761	0.887816	0.579941	0.607621	0.546886	0.477782	0.638257	0.845578	0.853201	0.973188	0.863536	0.9897	0.759236	0.950587	0.872764	0.996499	0.970963	0.978207	0.663822	0.847757	0.823324	0.998944	0.850398	0.944375	0.960094	0.973747	0.989978	0.926122	0.783774	0.950587	0.745533	0.941886
	9.792	0.530347	0.921482	0.868155	0.809794	0.959719	0.809359	0.965064	0.893863	0.87934	0.936001	0.948216	0.956761	0.92653	0.975522	0.762391	0.725491	0.534991	0.878825	0.56682	0.596089	0.523898	0.473427	0.637947	0.844027	0.820585	0.97182	0.850075	0.978537	0.756957	0.938156	0.842643	0.986317	0.984873	0.993241	0.654738	0.838472	0.803846	0.995	0.865126	0.972698	0.950349	0.984292	0.997565	0.936432	0.773133	0.938156	0.73308	0.928983
	9.864	0.516955	0.91148	0.882376	0.847337	0.94883	0.827146	0.965545	0.899316	0.853445	0.938781	0.941134	0.98093	0.933588	0.98664	0.726093	0.704309	0.512371	0.84422	0.537334	0.573027	0.518302	0.478639	0.609905	0.82025	0.810544	0.971549	0.852327	0.976635	0.769498	0.9561	0.848215	0.989716	0.955316	1	0.63284	0.831324	0.782218	0.984717	0.872213	0.975606	0.954627	0.999478	1	0.953858	0.744406	0.9561	0.72485	0.920579
	9.936	0.502665	0.904479	0.886548	0.841576	0.928363	0.827699	0.950926	0.899967	0.860249	0.94624	0.92697	0.968501	0.947907	0.985727	0.696356	0.681942	0.493622	0.831084	0.521434	0.560998	0.503817	0.479303	0.603404	0.814273	0.778576	0.961754	0.83613	0.965743	0.767244	0.93776	0.83263	0.980607	0.939296	0.99142	0.620824	0.816969	0.766089	0.965485	0.901559	0.991015	0.952584	1	0.980417	0.963034	0.728409	0.93776	0.715559	0.91643
	10.008	0.495609	0.899721	0.877917	0.845928	0.904546	0.813187	0.944407	0.908924	0.863038	0.94888	0.93211	0.963345	0.969653	0.996373	0.669111	0.646752	0.478562	0.822227	0.499228	0.548963	0.490873	0.485551	0.595488	0.806688	0.754038	0.962084	0.816647	0.958179	0.758572	0.931479	0.815216	0.960601	0.930025	0.990258	0.598811	0.800407	0.750271	0.944596	0.908333	0.999902	0.940603	0.994729	0.966831	0.969481	0.713179	0.931479	0.702741	0.908366
	10.08	0.489985	0.900029	0.901806	0.88564	0.916446	0.882454	0.944406	0.923025	0.843887	0.945037	0.941941	0.976381	0.981005	1	0.654793	0.639918	0.460694	0.800615	0.472358	0.528194	0.494495	0.497254	0.574053	0.788833	0.73628	0.959016	0.822364	0.966007	0.75824	0.944689	0.838228	0.970875	0.886233	0.975137	0.584641	0.782638	0.718008	0.931072	0.894269	0.995595	0.924664	0.997987	0.96418	0.980266	0.697432	0.944689	0.69235	0.913695
	10.152	0.472871	0.88258	0.905031	0.875823	0.91851	0.860046	0.935162	0.935407	0.868757	0.954691	0.9385	0.958616	1	0.983442	0.647457	0.621717	0.457928	0.799074	0.460837	0.515789	0.487952	0.50053	0.567861	0.794261	0.706436	0.944633	0.806888	0.947396	0.749624	0.929854	0.797571	0.949187	0.885727	0.96506	0.574954	0.787283	0.689218	0.909098	0.892236	1	0.912375	0.993629	0.959047	0.991569	0.695381	0.929854	0.669597	0.900131
	10.224	0.466895	0.878374	0.928717	0.91233	0.945004	0.895057	0.945889	0.955614	0.841611	0.955587	0.964391	0.978237	0.969671	0.968421	0.645501	0.607204	0.449419	0.773815	0.433459	0.491515	0.490308	0.51254	0.548524	0.77301	0.690495	0.934017	0.806634	0.952842	0.742069	0.928897	0.787555	0.943576	0.856791	0.958698	0.559087	0.764326	0.659089	0.899225	0.866646	0.989298	0.902769	0.995266	0.962423	1	0.67822	0.928897	0.664319	0.901632
	10.296	0.448693	0.860125	0.935204	0.916947	0.942763	0.873775	0.942111	0.966896	0.834751	0.971302	0.939902	0.967546	0.940004	0.947183	0.635963	0.598606	0.449501	0.769046	0.430719	0.486131	0.489503	0.522118	0.534767	0.776534	0.678979	0.928923	0.796165	0.952985	0.740673	0.924384	0.765463	0.93943	0.843366	0.949568	0.535962	0.742399	0.638944	0.87638	0.848571	0.985656	0.895936	0.9908	0.93719	0.998396	0.670724	0.924384	0.644824	0.894152
	10.368	0.438548	0.852895	0.935586	0.934087	0.940323	0.861193	0.933766	0.972091	0.816639	0.980781	0.969909	0.984328	0.911758	0.945263	0.61515	0.583885	0.441842	0.748177	0.415433	0.47711	0.503016	0.527074	0.529464	0.773521	0.662515	0.909381	0.78155	0.950936	0.737649	0.916516	0.755592	0.928114	0.822464	0.937945	0.525369	0.744455	0.62785	0.865981	0.849513	0.98126	0.879304	0.984989	0.908506	0.980311	0.654726	0.916516	0.635321	0.892484
	10.44	0.426061	0.837065	0.942942	0.960173	0.91978	0.874999	0.91149	0.969584	0.80392	0.993511	0.954101	0.992095	0.90249	0.934551	0.60447	0.587428	0.428135	0.736132	0.410812	0.470927	0.518214	0.527518	0.523717	0.777773	0.630813	0.889365	0.761746	0.948801	0.745063	0.917488	0.757692	0.936746	0.816082	0.93052	0.509737	0.731558	0.61033	0.844859	0.839887	0.970604	0.863487	0.975294	0.891028	0.955736	0.637637	0.917488	0.621641	0.886675
	10.512	0.411929	0.814731	0.965901	0.96063	0.914078	0.854728	0.904339	0.969649	0.808431	1	0.936384	0.978646	0.893101	0.939539	0.581996	0.57865	0.420183	0.724859	0.408556	0.468756	0.526451	0.521919	0.523048	0.776374	0.60064	0.865546	0.752232	0.952813	0.740875	0.914035	0.745048	0.918255	0.824931	0.93604	0.506242	0.730674	0.599918	0.830743	0.845311	0.973413	0.852965	0.959656	0.876053	0.939143	0.624344	0.914035	0.605594	0.880536
	10.584	0.403615	0.810235	0.987261	0.993412	0.925332	0.902399	0.890677	0.965331	0.798344	0.996245	0.927372	1	0.89202	0.948305	0.576079	0.577994	0.409381	0.70228	0.394637	0.451294	0.532543	0.518837	0.507308	0.760352	0.572698	0.838105	0.754862	0.957245	0.72986	0.916446	0.746769	0.909437	0.800088	0.92596	0.503956	0.729622	0.584869	0.823648	0.83174	0.972059	0.849028	0.961146	0.870971	0.929655	0.607192	0.916446	0.60693	0.887688
	10.656	0.394222	0.794418	0.994234	0.968763	0.954781	0.887914	0.883538	0.971691	0.799176	0.990308	0.895624	0.966359	0.896347	0.95098	0.567832	0.563383	0.422776	0.703475	0.400937	0.453669	0.521372	0.508367	0.506979	0.771781	0.558757	0.814506	0.747604	0.967616	0.743427	0.927139	0.722209	0.893435	0.803354	0.928511	0.491294	0.717624	0.586165	0.825972	0.838133	0.96994	0.842608	0.965757	0.858363	0.925496	0.608249	0.927139	0.594992	0.885544
	10.728	0.386361	0.783232	0.996212	0.976465	0.949126	0.923664	0.863777	0.96978	0.771307	0.979164	0.886541	0.978473	0.890917	0.940809	0.567662	0.558151	0.409177	0.686131	0.385776	0.434671	0.510863	0.496694	0.492695	0.74838	0.526271	0.781388	0.758485	0.970559	0.730754	0.916555	0.712312	0.88843	0.787301	0.921082	0.48062	0.721026	0.563973	0.819223	0.805133	0.94327	0.826898	0.964183	0.837095	0.918895	0.596615	0.916555	0.586667	0.87907
	10.8	0.381625	0.765687	1	0.980139	0.962509	0.940603	0.850853	0.975519	0.759425	0.978267	0.870691	0.976228	0.868917	0.918925	0.565194	0.560691	0.408281	0.679572	0.384918	0.427126	0.497987	0.488692	0.476535	0.731278	0.501377	0.758678	0.769008	0.979575	0.735518	0.92083	0.692778	0.890421	0.787134	0.919177	0.458694	0.697944	0.543715	0.805528	0.790288	0.938402	0.817335	0.960696	0.814672	0.915763	0.589301	0.92083	0.579236	0.870618
	10.872	0.371907	0.746618	0.985897	0.976546	0.951586	0.915482	0.836139	0.980857	0.756612	0.966555	0.84865	0.963106	0.867147	0.911484	0.567513	0.551131	0.406455	0.675912	0.375821	0.409639	0.477469	0.472315	0.47926	0.726439	0.472098	0.731603	0.780757	0.977963	0.7342	0.911678	0.665775	0.871376	0.794221	0.929957	0.44302	0.689951	0.52446	0.796317	0.792756	0.941858	0.801222	0.94833	0.799736	0.91165	0.587328	0.911678	0.563176	0.860089
	10.944	0.366435	0.742909	0.995959	0.987307	0.969565	0.963966	0.82198	0.981607	0.734684	0.958125	0.844878	0.985528	0.859194	0.910607	0.568882	0.557165	0.408046	0.674649	0.377619	0.404485	0.473761	0.458745	0.454796	0.68293	0.452415	0.704673	0.79622	0.984338	0.728655	0.925393	0.676522	0.865952	0.744672	0.909435	0.432963	0.677876	0.518988	0.78731	0.766406	0.917055	0.786503	0.945826	0.793931	0.908683	0.570454	0.925393	0.562382	0.873719
	11.016	0.358468	0.730005	0.974273	0.977903	0.961001	0.920412	0.818001	0.992529	0.731373	0.945574	0.831943	0.971295	0.834391	0.902906	0.568126	0.537688	0.413812	0.674859	0.366149	0.399542	0.457698	0.445966	0.461733	0.675297	0.440408	0.687093	0.791493	0.987003	0.732546	0.914781	0.656729	0.845505	0.774011	0.938538	0.416341	0.664902	0.506006	0.773902	0.769829	0.914784	0.770141	0.929424	0.791284	0.908814	0.561884	0.914781	0.546115	0.856158
	11.088	0.349559	0.718833	0.971651	1	0.953467	0.932529	0.804187	0.990649	0.708159	0.938638	0.827637	0.974349	0.82764	0.895899	0.562577	0.535723	0.408098	0.665498	0.357314	0.398244	0.447341	0.429915	0.436436	0.638826	0.426087	0.663435	0.791657	0.986276	0.728116	0.911816	0.657253	0.834915	0.760697	0.936121	0.418219	0.658218	0.502082	0.766293	0.758091	0.906502	0.763159	0.932558	0.795343	0.905803	0.549385	0.911816	0.547117	0.858129
	11.16	0.354817	0.722668	0.969521	0.986653	0.93841	0.924444	0.799814	0.995665	0.696449	0.931409	0.799745	0.973614	0.812214	0.895405	0.553425	0.529223	0.411563	0.654365	0.347614	0.390514	0.437936	0.423695	0.427301	0.624805	0.4203	0.65565	0.778211	0.988735	0.718288	0.926888	0.65436	0.828559	0.766082	0.941073	0.418482	0.645012	0.491381	0.759087	0.771331	0.91165	0.751695	0.930225	0.792491	0.910484	0.545084	0.926888	0.536851	0.849115
	11.232	0.356253	0.724595	0.945919	0.976986	0.922241	0.917111	0.79583	1	0.680161	0.92021	0.786095	0.96962	0.796802	0.897986	0.539639	0.519165	0.424505	0.649729	0.345546	0.386353	0.423712	0.413791	0.413353	0.61075	0.425644	0.639229	0.758312	0.99399	0.704116	0.924485	0.652477	0.819321	0.77017	0.944737	0.40867	0.630111	0.494255	0.751361	0.75323	0.910684	0.740686	0.929327	0.788172	0.91238	0.530811	0.924485	0.530653	0.852921
	11.304	0.355281	0.725196	0.948403	0.975331	0.910629	0.92996	0.790174	0.99846	0.6622	0.91726	0.790825	0.975438	0.781807	0.901129	0.521925	0.517088	0.429491	0.629507	0.335787	0.376846	0.410322	0.404885	0.390197	0.592391	0.429522	0.631963	0.751055	0.996214	0.704518	0.954259	0.65643	0.806095	0.749154	0.922486	0.414004	0.622582	0.489539	0.743882	0.740313	0.900634	0.739369	0.935415	0.774935	0.919293	0.513521	0.954259	0.518438	0.852947
	11.376	0.354795	0.727306	0.947955	0.967611	0.860469	0.899668	0.779006	0.998574	0.658367	0.912677	0.785248	0.96906	0.797632	0.917116	0.510177	0.497061	0.428922	0.626216	0.326184	0.373304	0.399935	0.396261	0.384426	0.597997	0.422888	0.623818	0.749137	1	0.693449	0.955365	0.641503	0.790713	0.762747	0.934293	0.41601	0.610787	0.478865	0.740034	0.731532	0.899042	0.719262	0.919351	0.754838	0.924834	0.508617	0.955365	0.504754	0.833089
	11.448	0.353842	0.725989	0.945159	0.961252	0.847837	0.927104	0.768605	0.990946	0.636998	0.905479	0.768226	0.963109	0.796201	0.916989	0.493825	0.487359	0.400818	0.611969	0.310953	0.372259	0.392813	0.385452	0.365871	0.581538	0.427979	0.618546	0.752388	0.994895	0.692048	0.96821	0.646916	0.789546	0.729383	0.906914	0.419303	0.610245	0.473166	0.739422	0.730696	0.891509	0.713358	0.92017	0.739158	0.921351	0.501526	0.96821	0.50783	0.840102
	11.52	0.350948	0.718756	0.929152	0.946818	0.818461	0.890937	0.76012	0.984682	0.628051	0.896405	0.750191	0.945411	0.778707	0.910184	0.474527	0.478484	0.394053	0.613874	0.301468	0.36529	0.379309	0.376727	0.364924	0.585796	0.416591	0.610608	0.74556	0.989303	0.691277	0.968847	0.629394	0.76972	0.735298	0.912548	0.409027	0.587577	0.471123	0.749522	0.72779	0.893943	0.694919	0.89331	0.73102	0.917036	0.508321	0.968847	0.499636	0.814355
	11.592	0.344052	0.7029	0.893235	0.917845	0.842343	0.903882	0.745501	0.976773	0.614507	0.883696	0.746367	0.938103	0.768658	0.897244	0.454662	0.47288	0.368341	0.608819	0.297717	0.370501	0.362973	0.362936	0.357772	0.589206	0.407603	0.599738	0.739475	0.979054	0.684094	0.952388	0.621792	0.763883	0.716473	0.903243	0.395073	0.572619	0.464658	0.760734	0.710711	0.882521	0.677709	0.879293	0.729714	0.912299	0.50276	0.952388	0.498154	0.809289
	11.664	0.333785	0.685557	0.876469	0.894207	0.837673	0.911141	0.725321	0.970284	0.610327	0.873725	0.740603	0.923543	0.765245	0.885192	0.450814	0.472696	0.360791	0.598396	0.296422	0.37224	0.351992	0.346573	0.35723	0.585063	0.395866	0.596371	0.726323	0.961422	0.676802	0.954352	0.60298	0.746122	0.719497	0.925366	0.384943	0.5628	0.452455	0.768503	0.712881	0.902535	0.652722	0.860454	0.728755	0.915348	0.495287	0.954352	0.490445	0.816295
	11.736	0.319358	0.667512	0.847243	0.856279	0.824816	0.899771	0.701589	0.96471	0.605627	0.868674	0.717407	0.908421	0.741723	0.868556	0.452955	0.464622	0.377779	0.597083	0.293564	0.371126	0.35023	0.341583	0.359409	0.583587	0.372611	0.582258	0.727375	0.963346	0.660886	0.946736	0.584578	0.734585	0.731707	0.92617	0.361255	0.55203	0.441277	0.766318	0.699585	0.894016	0.633585	0.838972	0.729564	0.914162	0.474442	0.946736	0.483529	0.809254
	11.808	0.306586	0.644561	0.815995	0.828019	0.837094	0.9421	0.687308	0.96112	0.591079	0.855673	0.720327	0.913758	0.742444	0.854452	0.434554	0.454393	0.36821	0.582659	0.292877	0.373152	0.348909	0.328918	0.353203	0.572017	0.366525	0.577732	0.715458	0.950347	0.647912	0.952075	0.581064	0.734638	0.725126	0.916052	0.353835	0.560831	0.442821	0.748409	0.696549	0.902526	0.606847	0.816778	0.729326	0.9094	0.458026	0.952075	0.47278	0.816025
	11.88	0.298539	0.639619	0.781582	0.804635	0.823449	0.932286	0.682422	0.958128	0.579349	0.844031	0.697198	0.887478	0.711586	0.837319	0.437724	0.453432	0.373576	0.581336	0.289462	0.362835	0.340782	0.329946	0.35639	0.575576	0.343877	0.567567	0.710996	0.95392	0.639133	0.963693	0.569157	0.722185	0.731841	0.919226	0.337301	0.559317	0.433615	0.74548	0.668659	0.877341	0.589749	0.798724	0.716009	0.902152	0.448539	0.963693	0.465877	0.806957
	11.952	0.286591	0.626221	0.751522	0.793382	0.836618	0.969919	0.666743	0.94762	0.554606	0.824724	0.697222	0.889612	0.701027	0.805639	0.415058	0.447305	0.35982	0.576413	0.278335	0.354444	0.331687	0.324015	0.353068	0.555768	0.345378	0.556464	0.698907	0.947147	0.626615	0.979499	0.579872	0.727362	0.706933	0.899303	0.333953	0.554777	0.431251	0.741318	0.65284	0.871838	0.56857	0.776323	0.703241	0.899637	0.440884	0.979499	0.452388	0.802317
	12.024	0.279878	0.617422	0.73065	0.790453	0.849498	0.983408	0.658984	0.948211	0.547407	0.829047	0.695051	0.865802	0.69536	0.812036	0.401212	0.448753	0.347414	0.581752	0.269251	0.345685	0.319021	0.319014	0.35726	0.549901	0.327133	0.54529	0.70013	0.944231	0.621591	0.988936	0.550295	0.700248	0.712958	0.920525	0.332597	0.549008	0.416419	0.746047	0.635531	0.858884	0.546578	0.751284	0.693197	0.897864	0.431458	0.988936	0.444748	0.78834
	12.096	0.270473	0.600708	0.711412	0.780384	0.849781	0.975522	0.64837	0.951337	0.539699	0.83317	0.691504	0.855378	0.675908	0.808044	0.39397	0.444836	0.341343	0.585892	0.263138	0.337863	0.307284	0.315506	0.355409	0.53813	0.319929	0.537638	0.704916	0.944574	0.621216	0.992753	0.544073	0.694988	0.697224	0.923045	0.332366	0.52933	0.400124	0.745228	0.626775	0.852536	0.521075	0.731365	0.686499	0.885967	0.411014	0.992753	0.432229	0.772143
	12.168	0.260758	0.579464	0.7023	0.773612	0.849939	1	0.640158	0.944036	0.521066	0.827191	0.653826	0.861348	0.638326	0.803903	0.384948	0.439423	0.321484	0.572959	0.257569	0.331813	0.306876	0.310464	0.335357	0.499496	0.31786	0.534077	0.708062	0.94486	0.622848	1	0.540984	0.707076	0.658753	0.871407	0.331241	0.52476	0.386098	0.748813	0.629525	0.861277	0.502846	0.723547	0.673466	0.865182	0.401075	1	0.429083	0.772615
	12.24	0.253124	0.573103	0.660195	0.748231	0.821338	0.955289	0.640119	0.951602	0.531673	0.847962	0.6446	0.84357	0.635189	0.829992	0.391021	0.431339	0.328639	0.590081	0.253215	0.324185	0.291431	0.307895	0.347325	0.493564	0.30579	0.520328	0.701184	0.938105	0.618005	0.981376	0.515077	0.69184	0.669505	0.900154	0.323182	0.498498	0.378281	0.753771	0.595045	0.833196	0.486022	0.707605	0.66441	0.852789	0.394109	0.981376	0.420981	0.753236
	12.312	0.2448	0.56185	0.624623	0.743167	0.820213	0.982481	0.637023	0.944005	0.518683	0.83513	0.619702	0.840768	0.609422	0.823508	0.371792	0.414651	0.31375	0.576803	0.254998	0.325749	0.295433	0.305983	0.332911	0.46306	0.309662	0.513709	0.707269	0.950043	0.606748	0.967269	0.504749	0.692252	0.648771	0.855961	0.342912	0.512081	0.366685	0.740117	0.584817	0.829291	0.467386	0.69235	0.642391	0.841302	0.384432	0.967269	0.4149	0.74118
	12.384	0.242617	0.557402	0.594668	0.738828	0.80494	0.961998	0.642084	0.944205	0.516102	0.846238	0.608696	0.831511	0.596617	0.811002	0.366184	0.413132	0.321783	0.58812	0.252484	0.323988	0.291955	0.2979	0.33188	0.453028	0.293261	0.501882	0.698525	0.946731	0.605926	0.955568	0.479737	0.669158	0.654196	0.866326	0.348511	0.501555	0.359792	0.724387	0.555623	0.800097	0.45388	0.672889	0.624616	0.831948	0.378963	0.955568	0.405587	0.729023
	12.456	0.241987	0.551029	0.570386	0.725984	0.795821	0.969464	0.637062	0.937129	0.498875	0.828721	0.591796	0.820476	0.579494	0.782339	0.352152	0.407564	0.32532	0.57889	0.246649	0.320858	0.299376	0.292072	0.31912	0.434398	0.295737	0.492517	0.702769	0.94622	0.603935	0.947091	0.483135	0.673929	0.628581	0.833211	0.34882	0.498773	0.349952	0.707667	0.539832	0.794814	0.443259	0.659397	0.60818	0.822563	0.371294	0.947091	0.403609	0.726439
	12.528	0.245376	0.550267	0.567361	0.719866	0.766524	0.957519	0.62329	0.929726	0.479368	0.815366	0.591268	0.820479	0.563188	0.764973	0.345372	0.397111	0.317912	0.565074	0.242727	0.32968	0.297885	0.284278	0.308008	0.413571	0.300757	0.498081	0.696838	0.946633	0.609794	0.93917	0.485027	0.659554	0.615781	0.799589	0.353028	0.499818	0.343764	0.699963	0.532484	0.779273	0.427247	0.639232	0.587743	0.810812	0.360394	0.93917	0.400565	0.720653
	12.6	0.243209	0.540964	0.560042	0.7279	0.759239	0.943839	0.610657	0.921427	0.483552	0.810185	0.607959	0.806107	0.557034	0.748525	0.342155	0.387847	0.304915	0.563269	0.237693	0.324511	0.285665	0.275742	0.309184	0.408226	0.307092	0.483079	0.674079	0.930485	0.600215	0.916021	0.476164	0.639339	0.620777	0.817163	0.350301	0.487048	0.342139	0.694331	0.515786	0.766508	0.413914	0.62128	0.572603	0.800815	0.355778	0.916021	0.389499	0.703253
	12.672	0.244568	0.531745	0.554212	0.722274	0.7623	0.965558	0.591144	0.912913	0.466285	0.792062	0.601948	0.803751	0.540945	0.730115	0.337648	0.374155	0.28292	0.543522	0.23701	0.336998	0.283917	0.268827	0.303805	0.39108	0.319386	0.48475	0.665872	0.92157	0.58845	0.89299	0.490054	0.635901	0.596526	0.771561	0.354816	0.498422	0.328288	0.685022	0.519211	0.766455	0.394162	0.601059	0.559442	0.789242	0.34081	0.89299	0.384584	0.700899
	12.744	0.231104	0.516268	0.563619	0.737866	0.742504	0.938924	0.577905	0.907864	0.468284	0.792735	0.612608	0.795177	0.53048	0.709416	0.339998	0.371509	0.278519	0.554399	0.22468	0.316454	0.262169	0.256544	0.305866	0.389806	0.310739	0.479643	0.639943	0.918769	0.577837	0.882553	0.465899	0.610292	0.605505	0.79518	0.351168	0.490067	0.321575	0.685092	0.50165	0.756959	0.38013	0.582269	0.54233	0.776799	0.338145	0.882553	0.37726	0.691717
	12.816	0.229603	0.508092	0.550027	0.702929	0.731531	0.950186	0.56638	0.898436	0.450642	0.779576	0.592289	0.799931	0.50097	0.679763	0.336033	0.361584	0.262113	0.544448	0.213317	0.308147	0.252469	0.253441	0.30064	0.378914	0.301013	0.470737	0.617559	0.897359	0.559336	0.871925	0.462966	0.603932	0.575006	0.765616	0.338879	0.484055	0.315519	0.676479	0.491358	0.754493	0.360757	0.565069	0.531401	0.768913	0.333625	0.871925	0.371009	0.694192
	12.888	0.225545	0.497462	0.553771	0.686693	0.696337	0.932338	0.559018	0.889491	0.437149	0.766841	0.564303	0.78941	0.485405	0.687725	0.330919	0.357437	0.25358	0.54916	0.196749	0.287919	0.23416	0.242868	0.295701	0.381798	0.292327	0.463259	0.621058	0.907402	0.54978	0.861796	0.441679	0.581741	0.565155	0.77459	0.335045	0.476912	0.310204	0.666372	0.472669	0.760174	0.349777	0.546499	0.521225	0.768435	0.329701	0.861796	0.362837	0.679163
	12.96	0.223579	0.48509	0.541076	0.663085	0.689265	0.936978	0.54271	0.88073	0.420714	0.75549	0.55469	0.783892	0.475883	0.683048	0.320994	0.353438	0.24754	0.540802	0.192099	0.274259	0.220193	0.233301	0.281249	0.374608	0.285122	0.457123	0.604442	0.879955	0.547355	0.859474	0.42834	0.558547	0.551637	0.776684	0.329436	0.460608	0.300032	0.652536	0.461251	0.76641	0.336606	0.52993	0.515023	0.767001	0.324058	0.859474	0.350682	0.671452
	13.032	0.218806	0.476207	0.520024	0.631059	0.709163	0.954847	0.527683	0.880652	0.395593	0.72175	0.536185	0.772646	0.458803	0.667031	0.299386	0.344977	0.237628	0.521722	0.185332	0.276259	0.221099	0.226094	0.267865	0.358964	0.285626	0.449068	0.610054	0.878273	0.532091	0.836906	0.421474	0.543698	0.513737	0.730117	0.334331	0.473164	0.289928	0.633694	0.458066	0.771486	0.320788	0.513057	0.512269	0.76134	0.31462	0.836906	0.334654	0.663306
	13.104	0.214677	0.467452	0.486474	0.585319	0.697978	0.93694	0.524208	0.884876	0.390212	0.71289	0.568891	0.771267	0.467074	0.673882	0.293774	0.348525	0.247277	0.523491	0.1785	0.258414	0.203976	0.211963	0.268608	0.366255	0.265213	0.436877	0.5896	0.858341	0.527431	0.836595	0.402772	0.533834	0.51954	0.743244	0.329271	0.461112	0.281385	0.623586	0.439108	0.751293	0.317362	0.494904	0.509633	0.758591	0.312508	0.836595	0.327692	0.650394
	13.176	0.208448	0.457954	0.458426	0.564474	0.701198	0.957779	0.513427	0.880141	0.372607	0.678836	0.553719	0.762732	0.463126	0.663756	0.284387	0.337821	0.245218	0.502566	0.175058	0.251737	0.210721	0.206952	0.255809	0.346329	0.265048	0.427183	0.582953	0.842325	0.511483	0.826639	0.400972	0.509551	0.494939	0.710234	0.333858	0.463047	0.26944	0.611718	0.438093	0.735574	0.297667	0.473708	0.505999	0.754128	0.309771	0.826639	0.321712	0.644835
	13.248	0.202245	0.440744	0.420256	0.542485	0.687641	0.949133	0.513294	0.879321	0.365441	0.66494	0.56545	0.753554	0.47126	0.664635	0.288506	0.333223	0.246963	0.498485	0.164443	0.234075	0.200279	0.197324	0.249074	0.355509	0.255239	0.416513	0.570893	0.831572	0.493637	0.811382	0.388696	0.490188	0.508899	0.718374	0.32857	0.45587	0.2717	0.608196	0.425828	0.731593	0.288373	0.463106	0.506073	0.757394	0.299754	0.811382	0.310473	0.627925
	13.32	0.200691	0.430325	0.413593	0.533697	0.672965	0.948126	0.511122	0.87217	0.350894	0.651279	0.5577	0.758444	0.464568	0.658446	0.288134	0.325946	0.240862	0.487903	0.162475	0.220383	0.196137	0.196559	0.236853	0.348704	0.251318	0.400146	0.566975	0.825291	0.490645	0.796693	0.384545	0.48531	0.494245	0.694741	0.309503	0.440545	0.268276	0.597811	0.412948	0.712277	0.271421	0.450747	0.496252	0.751233	0.292983	0.796693	0.308124	0.623624
	13.392	0.195226	0.421249	0.406952	0.527065	0.663089	0.95284	0.50525	0.866307	0.33685	0.632945	0.553868	0.771221	0.442732	0.627968	0.273588	0.314741	0.232617	0.47608	0.158463	0.208427	0.201017	0.193392	0.20958	0.334294	0.250731	0.395188	0.556827	0.812332	0.490505	0.802235	0.389454	0.492565	0.467995	0.651969	0.298393	0.434666	0.260284	0.586256	0.394337	0.685948	0.256111	0.435351	0.477572	0.739485	0.288159	0.802235	0.310518	0.624767
	13.464	0.191638	0.421552	0.391436	0.512021	0.654915	0.93275	0.499621	0.858439	0.338962	0.634132	0.571643	0.768965	0.45101	0.637704	0.265804	0.308936	0.222642	0.482802	0.149635	0.194575	0.18695	0.182446	0.214556	0.351812	0.240451	0.386385	0.567332	0.817964	0.482145	0.783078	0.36194	0.459147	0.488185	0.676242	0.290491	0.425556	0.256806	0.568566	0.38712	0.670718	0.245159	0.414717	0.46582	0.738989	0.282929	0.783078	0.308194	0.618862
	13.536	0.183104	0.414626	0.397125	0.507596	0.683183	0.962693	0.490601	0.844758	0.324118	0.616862	0.569981	0.771208	0.442429	0.625222	0.255673	0.297454	0.207569	0.467548	0.146409	0.195677	0.192257	0.186584	0.199773	0.333593	0.246102	0.376472	0.575452	0.813177	0.47867	0.771729	0.36121	0.460034	0.447768	0.628907	0.286117	0.421529	0.24046	0.547072	0.368413	0.650875	0.232433	0.404238	0.448612	0.728395	0.272255	0.771729	0.308111	0.626828
	13.608	0.179083	0.408513	0.385998	0.498057	0.682403	0.942022	0.487851	0.837242	0.317429	0.625265	0.576624	0.768421	0.452046	0.635478	0.25841	0.297248	0.197597	0.478071	0.141222	0.190022	0.177913	0.179427	0.209056	0.348255	0.238484	0.370237	0.569009	0.80641	0.474537	0.757798	0.343192	0.441805	0.452159	0.646069	0.276842	0.408787	0.236872	0.534331	0.359817	0.643226	0.220534	0.381533	0.437105	0.726682	0.268812	0.757798	0.302911	0.615843
	13.68	0.174971	0.397378	0.380636	0.494952	0.70055	0.967578	0.477232	0.827877	0.311963	0.622902	0.591471	0.778426	0.457726	0.642686	0.261612	0.296645	0.194675	0.476473	0.141797	0.193125	0.17465	0.175218	0.206655	0.33691	0.236509	0.362915	0.564137	0.802459	0.47114	0.743828	0.342161	0.439035	0.427358	0.617317	0.269629	0.397745	0.225481	0.509639	0.344609	0.62872	0.212639	0.362475	0.43002	0.724796	0.255764	0.743828	0.308161	0.623506
	13.752	0.173679	0.393086	0.38283	0.500851	0.677325	0.959928	0.467282	0.817444	0.300349	0.600732	0.580337	0.777327	0.462224	0.645897	0.256654	0.294676	0.19327	0.461773	0.140177	0.19586	0.168272	0.173081	0.197318	0.323711	0.232244	0.354822	0.557513	0.802217	0.473001	0.737348	0.348921	0.439156	0.411691	0.604818	0.255249	0.381451	0.218286	0.487917	0.337599	0.616157	0.206556	0.349527	0.426387	0.731459	0.247767	0.737348	0.303891	0.62126
	13.824	0.170268	0.394894	0.391689	0.508404	0.648503	0.951298	0.46659	0.813068	0.304161	0.602486	0.599067	0.781433	0.478683	0.652429	0.248267	0.294237	0.197934	0.459659	0.1348	0.190985	0.160463	0.163585	0.199461	0.337141	0.221331	0.351703	0.544611	0.800138	0.466295	0.732639	0.334785	0.407339	0.425163	0.619705	0.258264	0.380067	0.212994	0.471612	0.338544	0.619918	0.197422	0.331314	0.424	0.739119	0.246154	0.732639	0.297541	0.607986
	13.896	0.171487	0.407999	0.401117	0.520992	0.659472	0.986052	0.464027	0.801486	0.285548	0.576792	0.561913	0.773793	0.474766	0.637472	0.236326	0.28795	0.185637	0.424339	0.14114	0.192596	0.166817	0.163579	0.185524	0.310562	0.220838	0.347879	0.530094	0.792573	0.452659	0.731086	0.349005	0.415042	0.394274	0.572175	0.258646	0.382125	0.20431	0.462727	0.336261	0.599968	0.185475	0.317563	0.419724	0.740692	0.235497	0.731086	0.289696	0.605254
	13.968	0.173923	0.414245	0.410147	0.538783	0.627702	0.95285	0.456913	0.788764	0.291232	0.575111	0.572809	0.774673	0.46715	0.620486	0.240952	0.288003	0.187827	0.423868	0.136419	0.173686	0.158959	0.158276	0.183966	0.323107	0.206784	0.343801	0.51321	0.797851	0.451949	0.732253	0.320396	0.372835	0.418819	0.601707	0.25428	0.383132	0.205737	0.452348	0.333822	0.588146	0.172097	0.29427	0.429544	0.764652	0.233692	0.732253	0.277039	0.595314
	14.04	0.17679	0.421805	0.42122	0.536193	0.620174	0.969963	0.453477	0.780584	0.280705	0.554728	0.548555	0.764386	0.451491	0.615979	0.242034	0.288699	0.188746	0.40674	0.138368	0.173355	0.166689	0.157316	0.171658	0.310021	0.206815	0.33795	0.506389	0.798263	0.449263	0.722606	0.328513	0.379604	0.394281	0.567669	0.249681	0.381823	0.201913	0.444374	0.329242	0.567765	0.162159	0.282552	0.434656	0.766001	0.22059	0.722606	0.274599	0.584144
	14.112	0.180494	0.417398	0.427245	0.549054	0.590328	0.935415	0.444426	0.773052	0.267548	0.533637	0.565223	0.764894	0.435616	0.606109	0.246862	0.294973	0.188401	0.39669	0.133082	0.162177	0.15845	0.158303	0.174065	0.313545	0.196703	0.329006	0.503346	0.792246	0.442222	0.727157	0.318587	0.372265	0.3962	0.571132	0.246568	0.383349	0.193623	0.433683	0.321183	0.547165	0.15709	0.272606	0.434297	0.763601	0.211144	0.727157	0.265096	0.573833
	14.184	0.183029	0.414636	0.427569	0.544217	0.576484	0.926585	0.434864	0.758673	0.263568	0.525268	0.571218	0.76561	0.445341	0.620112	0.24902	0.300771	0.193951	0.405169	0.125327	0.158577	0.151821	0.149708	0.178151	0.322514	0.188155	0.321128	0.513099	0.806053	0.432286	0.71352	0.302616	0.336219	0.406315	0.586003	0.245055	0.378337	0.184031	0.421948	0.3157	0.548995	0.148554	0.259907	0.434612	0.762027	0.203545	0.71352	0.258607	0.560362
	14.256	0.182343	0.413697	0.428619	0.542818	0.572814	0.928333	0.425776	0.749534	0.244011	0.490952	0.544007	0.751999	0.437752	0.59724	0.236588	0.304165	0.181019	0.380425	0.12559	0.158153	0.154704	0.154152	0.16812	0.310721	0.183118	0.32148	0.508662	0.800601	0.432154	0.721089	0.322005	0.35495	0.371981	0.54535	0.254777	0.383619	0.168174	0.403421	0.312098	0.537354	0.139572	0.250034	0.421138	0.741683	0.189903	0.721089	0.25306	0.554987
	14.328	0.181852	0.427651	0.418487	0.541956	0.562095	0.902119	0.419629	0.74336	0.24133	0.494656	0.571131	0.772423	0.432375	0.577172	0.24253	0.31331	0.188993	0.387087	0.123761	0.149043	0.150147	0.150774	0.168675	0.320515	0.175775	0.30882	0.492804	0.777292	0.430642	0.725725	0.295807	0.330468	0.390654	0.558007	0.24979	0.376497	0.162377	0.398805	0.307281	0.545974	0.1334	0.23365	0.419417	0.734545	0.187844	0.725725	0.242536	0.54125
	14.4	0.183972	0.441194	0.400969	0.507722	0.573135	0.908222	0.413517	0.730935	0.228548	0.483276	0.548383	0.750562	0.415326	0.56596	0.249249	0.316122	0.185321	0.371337	0.123988	0.147917	0.139808	0.141461	0.16593	0.310544	0.18182	0.312756	0.49289	0.789422	0.436205	0.72122	0.291047	0.323458	0.386582	0.533662	0.256377	0.37774	0.149418	0.386851	0.301119	0.534068	0.130714	0.229615	0.405515	0.719732	0.176712	0.72122	0.234794	0.53976
	14.472	0.17907	0.45212	0.396595	0.508358	0.557469	0.881197	0.407683	0.721707	0.224149	0.47982	0.557641	0.773695	0.404427	0.554549	0.255065	0.324278	0.184373	0.364269	0.121669	0.143158	0.132284	0.140891	0.161714	0.30961	0.176623	0.306352	0.477144	0.765579	0.435755	0.721869	0.271039	0.312275	0.387643	0.52851	0.243062	0.35971	0.141792	0.376563	0.293819	0.526858	0.123479	0.217532	0.401607	0.717338	0.174642	0.721869	0.230418	0.525847
	14.544	0.178739	0.451776	0.382689	0.474745	0.561239	0.880094	0.396651	0.708658	0.225334	0.475771	0.559377	0.764553	0.401014	0.545824	0.26322	0.330995	0.183552	0.361236	0.11178	0.137736	0.12844	0.129736	0.166794	0.31819	0.176937	0.303913	0.475181	0.763405	0.430692	0.731945	0.249436	0.285543	0.382992	0.527372	0.236776	0.352752	0.137088	0.360295	0.290085	0.508505	0.123142	0.208174	0.393714	0.714326	0.169094	0.731945	0.224317	0.514888
	14.616	0.178498	0.447013	0.36689	0.454225	0.553361	0.868617	0.385128	0.69491	0.217717	0.463953	0.541931	0.764893	0.393512	0.527986	0.254762	0.335739	0.16429	0.341443	0.107724	0.138789	0.125938	0.129649	0.160445	0.314602	0.171918	0.299462	0.459972	0.735112	0.419914	0.739904	0.253753	0.302335	0.350557	0.493085	0.226108	0.33618	0.135899	0.34236	0.279672	0.484952	0.115066	0.202628	0.389489	0.707826	0.164804	0.739904	0.217086	0.500514
	14.688	0.173536	0.435088	0.338695	0.440316	0.538819	0.858705	0.36861	0.67546	0.215319	0.461245	0.555009	0.765121	0.401167	0.539118	0.256491	0.340428	0.159829	0.347911	0.101938	0.13648	0.116243	0.125954	0.15945	0.322383	0.170485	0.292992	0.449012	0.726853	0.40868	0.746979	0.233989	0.265207	0.364387	0.513318	0.221955	0.319372	0.133752	0.328046	0.276905	0.485377	0.1074	0.188004	0.38442	0.709995	0.160979	0.746979	0.212953	0.498226
	14.76	0.172897	0.430795	0.300129	0.409547	0.532	0.856459	0.356043	0.664061	0.204645	0.447222	0.534498	0.739849	0.40999	0.553734	0.241465	0.339004	0.149807	0.332589	0.0959133	0.134756	0.113771	0.118865	0.159654	0.316856	0.171408	0.300128	0.446993	0.709216	0.405735	0.750794	0.229502	0.264046	0.344482	0.470599	0.236528	0.332011	0.122359	0.304068	0.272271	0.469227	0.100665	0.190477	0.370675	0.689035	0.153057	0.750794	0.210542	0.498045
	14.832	0.164862	0.421131	0.27318	0.409022	0.517859	0.841916	0.346469	0.642259	0.198833	0.451511	0.548374	0.742405	0.425257	0.555954	0.237434	0.338881	0.147144	0.325409	0.096426	0.138265	0.106641	0.118276	0.152581	0.305491	0.171837	0.293133	0.425091	0.684903	0.4068	0.753624	0.223283	0.26074	0.349399	0.468482	0.230691	0.319445	0.116368	0.292129	0.259259	0.465211	0.0899545	0.175449	0.362839	0.682352	0.143848	0.753624	0.217409	0.493408
	14.904	0.15523	0.417374	0.257816	0.401226	0.512443	0.844887	0.334485	0.629054	0.198639	0.451131	0.530906	0.731269	0.432101	0.554047	0.236118	0.336877	0.141885	0.317035	0.0906704	0.134299	0.106253	0.1123	0.148957	0.294723	0.170585	0.288881	0.411967	0.669308	0.401148	0.752144	0.219254	0.254782	0.341783	0.451811	0.240147	0.313009	0.111393	0.282412	0.256663	0.449511	0.0856913	0.177179	0.350747	0.672566	0.137781	0.752144	0.214057	0.485146
	14.976	0.14916	0.410566	0.263107	0.411267	0.503689	0.850954	0.323225	0.615292	0.192857	0.449295	0.528637	0.733963	0.430797	0.549756	0.228553	0.338017	0.127791	0.301167	0.091931	0.143421	0.101307	0.109834	0.137227	0.272807	0.170085	0.284698	0.386933	0.641317	0.400837	0.762223	0.227576	0.253994	0.33513	0.440647	0.241201	0.304664	0.105762	0.274714	0.252131	0.43725	0.081628	0.164395	0.342844	0.666697	0.125312	0.762223	0.211737	0.48154
	15.048	0.141973	0.402404	0.275013	0.419177	0.489208	0.849815	0.311728	0.604859	0.197487	0.454406	0.527791	0.74652	0.417095	0.545175	0.226311	0.343692	0.117883	0.299652	0.0940676	0.146761	0.105573	0.100528	0.13187	0.264671	0.166043	0.277747	0.375797	0.636518	0.390688	0.754989	0.216977	0.23305	0.344036	0.443302	0.241977	0.28945	0.103459	0.275502	0.246195	0.428685	0.0809955	0.159901	0.329115	0.65746	0.117502	0.754989	0.19971	0.472106
	15.12	0.138236	0.398175	0.273557	0.406044	0.473356	0.843223	0.300141	0.593738	0.190706	0.451068	0.501844	0.743117	0.398064	0.529773	0.219169	0.352411	0.109569	0.286888	0.0852763	0.131765	0.106349	0.0853406	0.126104	0.244173	0.164727	0.279287	0.360599	0.618602	0.37617	0.731293	0.218472	0.224411	0.339099	0.435979	0.237905	0.279012	0.0975386	0.267468	0.236295	0.4131	0.0803739	0.168795	0.318817	0.647439	0.111195	0.731293	0.193031	0.456971
	15.192	0.129649	0.386424	0.262477	0.415843	0.480557	0.853072	0.288348	0.58105	0.185033	0.453924	0.518843	0.75346	0.396399	0.505755	0.213647	0.360369	0.106661	0.279134	0.0845373	0.132754	0.104975	0.0823288	0.114603	0.240292	0.160302	0.271743	0.348844	0.620282	0.369269	0.730768	0.208628	0.207351	0.346298	0.44049	0.223228	0.265689	0.0981666	0.271706	0.223765	0.399425	0.0788004	0.153618	0.315726	0.645418	0.110112	0.730768	0.185591	0.440437
	15.264	0.12728	0.372307	0.24693	0.400197	0.472513	0.841476	0.279254	0.573509	0.176453	0.449555	0.497888	0.728306	0.377467	0.468094	0.203263	0.366297	0.0991463	0.255641	0.0743785	0.11151	0.103374	0.0777109	0.105664	0.223708	0.156341	0.271602	0.332417	0.598561	0.362478	0.7126	0.209466	0.208684	0.33192	0.414595	0.206839	0.248283	0.0959685	0.256485	0.213933	0.388921	0.0766367	0.161646	0.312657	0.627645	0.103983	0.7126	0.186801	0.437627
	15.336	0.11926	0.34842	0.235511	0.400986	0.490847	0.86528	0.272115	0.568041	0.171226	0.451664	0.48674	0.706615	0.366841	0.450308	0.198246	0.365234	0.0968087	0.244361	0.074681	0.113522	0.0888917	0.0729358	0.0947615	0.216394	0.157893	0.26647	0.326818	0.594668	0.365166	0.716047	0.207202	0.201902	0.323331	0.399029	0.190413	0.237565	0.0924611	0.248936	0.213752	0.381609	0.0709462	0.144388	0.307183	0.616379	0.0963596	0.716047	0.185049	0.427863
	15.408	0.113882	0.331152	0.225398	0.402344	0.487332	0.854855	0.267164	0.565999	0.164886	0.453933	0.476703	0.683526	0.340872	0.428203	0.191442	0.364873	0.0932981	0.23764	0.0691049	0.102167	0.0802026	0.066555	0.090612	0.207961	0.161797	0.261805	0.326639	0.5909	0.345876	0.666783	0.198865	0.178037	0.312768	0.387399	0.187272	0.2294	0.0870564	0.231822	0.215032	0.374836	0.0694422	0.150391	0.298637	0.60397	0.0881791	0.666783	0.187528	0.437492
	15.48	0.111311	0.31594	0.217554	0.398769	0.488627	0.84793	0.257979	0.554727	0.159851	0.456798	0.472897	0.671699	0.308997	0.409633	0.183929	0.36527	0.0899442	0.234467	0.0591754	0.0922716	0.0670882	0.0590978	0.0943198	0.206654	0.164816	0.259658	0.321642	0.589992	0.347823	0.661288	0.191999	0.172789	0.305303	0.385786	0.177849	0.21632	0.0816432	0.20864	0.22585	0.371089	0.0643965	0.143096	0.288224	0.598819	0.0809105	0.661288	0.17827	0.423918
	15.552	0.109073	0.312023	0.216266	0.412175	0.508478	0.859265	0.254013	0.546507	0.161568	0.456389	0.465433	0.648167	0.286795	0.384591	0.176636	0.363817	0.0829915	0.222917	0.060594	0.0994971	0.0616029	0.0578236	0.0912388	0.20658	0.162621	0.249953	0.311214	0.579372	0.343998	0.671472	0.198039	0.175083	0.285459	0.366171	0.164084	0.205317	0.0775186	0.197493	0.2236	0.363226	0.0625859	0.136451	0.276281	0.59381	0.0732149	0.671472	0.171178	0.410529
	15.624	0.107	0.307699	0.233347	0.407678	0.496716	0.827386	0.245736	0.529536	0.154954	0.448819	0.464046	0.648024	0.275114	0.381119	0.170589	0.369035	0.077887	0.219775	0.0523077	0.0876773	0.0558829	0.0485061	0.0942145	0.205408	0.158411	0.25161	0.304244	0.562248	0.329782	0.64995	0.186808	0.160839	0.286115	0.360832	0.156683	0.196586	0.0683305	0.175413	0.232275	0.373232	0.0604005	0.145744	0.268687	0.583673	0.0664655	0.64995	0.168761	0.407283
	15.696	0.103239	0.294568	0.239497	0.420952	0.519022	0.848825	0.238092	0.518556	0.152026	0.445423	0.474205	0.641335	0.265214	0.370332	0.161365	0.367779	0.0755683	0.217597	0.050686	0.0928817	0.0490974	0.0437764	0.0972339	0.204047	0.146828	0.243985	0.308945	0.569201	0.31932	0.655379	0.182646	0.147044	0.286403	0.361638	0.141011	0.181303	0.0634899	0.16863	0.239128	0.375946	0.0586428	0.13938	0.263379	0.579508	0.0601257	0.655379	0.165445	0.395702
	15.768	0.101138	0.286157	0.264245	0.4253	0.505327	0.825477	0.229528	0.507081	0.138067	0.426727	0.457265	0.636662	0.255783	0.377222	0.152864	0.367822	0.0737576	0.207889	0.0441973	0.0854006	0.044103	0.0393303	0.100045	0.203285	0.139014	0.24412	0.302991	0.546963	0.307806	0.633815	0.179926	0.144622	0.275587	0.34304	0.133211	0.170623	0.0577525	0.154408	0.248966	0.381297	0.0592111	0.144555	0.259213	0.573467	0.0540073	0.633815	0.16177	0.399849
	15.84	0.0952342	0.276272	0.267713	0.418545	0.490559	0.8177	0.228829	0.503276	0.130568	0.421302	0.438956	0.629395	0.254481	0.38085	0.147685	0.370302	0.0731075	0.198123	0.0370307	0.0763589	0.0426565	0.0394543	0.107473	0.210238	0.129266	0.236609	0.292471	0.522005	0.310258	0.629719	0.177401	0.138695	0.259617	0.33325	0.127147	0.157939	0.057006	0.148425	0.250629	0.385003	0.0556249	0.136026	0.261669	0.575147	0.048499	0.629719	0.153662	0.378568
	15.912	0.0862141	0.259036	0.273345	0.418084	0.479418	0.825137	0.223747	0.482932	0.131049	0.420115	0.439188	0.635046	0.255197	0.396261	0.147654	0.370931	0.0755974	0.199894	0.035538	0.0732222	0.0402865	0.0348085	0.114436	0.211697	0.123981	0.232047	0.289384	0.534415	0.286453	0.591536	0.158925	0.115483	0.262374	0.33044	0.118352	0.143614	0.055642	0.142764	0.259898	0.389124	0.0528554	0.128947	0.267439	0.584621	0.0444386	0.591536	0.146656	0.366566
	15.984	0.0843835	0.25313	0.257789	0.392306	0.429814	0.768118	0.214465	0.470099	0.117701	0.383178	0.394347	0.615156	0.252372	0.412112	0.148287	0.374084	0.0722192	0.194607	0.0336084	0.0572678	0.0365267	0.0330678	0.111354	0.207992	0.1228	0.23143	0.274118	0.506364	0.267863	0.556927	0.155975	0.121929	0.246018	0.304733	0.123538	0.139858	0.0541841	0.128547	0.272825	0.401308	0.0501083	0.126679	0.266903	0.574658	0.0387085	0.556927	0.143998	0.366975
	16.056	0.078433	0.240484	0.248054	0.391048	0.434852	0.784122	0.20841	0.461921	0.117815	0.367706	0.404065	0.610332	0.238789	0.396193	0.147665	0.383722	0.0700767	0.194516	0.0380923	0.0590966	0.0383473	0.0308974	0.111077	0.210395	0.120798	0.228021	0.273863	0.512896	0.25812	0.536086	0.14897	0.111762	0.250522	0.306527	0.110334	0.111995	0.0536378	0.122875	0.272844	0.409811	0.0448148	0.110745	0.275168	0.577917	0.0366126	0.536086	0.135668	0.349586
	16.128	0.0773269	0.235193	0.239827	0.381355	0.403107	0.75328	0.200782	0.453698	0.10943	0.339006	0.382969	0.589171	0.224517	0.377163	0.140466	0.380569	0.0639849	0.182814	0.0380562	0.053417	0.0415636	0.0357313	0.100873	0.201117	0.123054	0.224056	0.260148	0.489961	0.245496	0.50843	0.148896	0.119922	0.226668	0.286663	0.114796	0.112123	0.0523637	0.116974	0.267074	0.413265	0.0415657	0.10198	0.274049	0.560411	0.032691	0.50843	0.129546	0.337012
	16.2	0.0762708	0.225499	0.238152	0.393775	0.394013	0.753768	0.194112	0.436913	0.112656	0.322391	0.390898	0.585394	0.222428	0.373702	0.13154	0.380661	0.0628802	0.184846	0.0358986	0.0477633	0.0386502	0.0305491	0.102343	0.194142	0.126432	0.219564	0.263795	0.498796	0.243657	0.496274	0.13946	0.0982884	0.236115	0.297185	0.108461	0.0938289	0.0494783	0.112106	0.273364	0.409555	0.0368981	0.0877366	0.28186	0.563192	0.0332824	0.496274	0.123298	0.325554
	16.272	0.0750545	0.218713	0.237508	0.385241	0.377872	0.74772	0.190246	0.414055	0.103177	0.305486	0.376533	0.578924	0.21588	0.367236	0.122359	0.362193	0.0580838	0.176033	0.0338953	0.0471155	0.0404812	0.0357362	0.0990874	0.182796	0.129123	0.214337	0.263115	0.49865	0.238449	0.484855	0.134507	0.0962643	0.23873	0.29355	0.0988547	0.0766813	0.0475905	0.107424	0.264978	0.412468	0.0355599	0.0811112	0.281041	0.559317	0.0302372	0.484855	0.117399	0.312523
	16.344	0.073221	0.213131	0.246241	0.374184	0.362761	0.717544	0.182388	0.397416	0.097785	0.291914	0.342045	0.553365	0.21268	0.36852	0.112746	0.34329	0.0543083	0.168323	0.0258322	0.0359957	0.0381016	0.0356937	0.103232	0.167848	0.131166	0.211466	0.25988	0.488592	0.226795	0.453661	0.131259	0.0964392	0.237182	0.289109	0.100945	0.080383	0.0457038	0.0974108	0.276235	0.431549	0.0350622	0.0761634	0.272052	0.543411	0.0246397	0.453661	0.110989	0.302854
	16.416	0.074453	0.212508	0.244384	0.353681	0.377683	0.726219	0.179081	0.3823	0.0992055	0.29549	0.331025	0.557016	0.21589	0.36314	0.106319	0.322487	0.0512696	0.16058	0.023124	0.03625	0.0357787	0.0363014	0.0976913	0.154657	0.132368	0.20225	0.260912	0.492393	0.230404	0.469996	0.125118	0.0891012	0.22929	0.285642	0.0936088	0.0663814	0.0469815	0.0975399	0.268571	0.427108	0.0306233	0.0669708	0.264984	0.536697	0.0174999	0.469996	0.104253	0.275352
	16.488	0.0762858	0.208399	0.236215	0.342632	0.351947	0.69456	0.171999	0.36652	0.0949574	0.275047	0.312837	0.5297	0.213948	0.352871	0.096991	0.301239	0.0461139	0.151099	0.0169165	0.0241637	0.0364606	0.039598	0.0893307	0.142637	0.137329	0.203367	0.2525	0.472855	0.221025	0.45009	0.125304	0.0994318	0.206239	0.271523	0.0930305	0.0673284	0.0489099	0.0913581	0.279694	0.472849	0.0259179	0.0612774	0.255057	0.513665	0.0121346	0.45009	0.102326	0.265554
	16.56	0.0765361	0.202342	0.222854	0.337831	0.365239	0.706847	0.162554	0.349626	0.101791	0.276966	0.304232	0.518408	0.204933	0.354445	0.093287	0.289537	0.0441165	0.154176	0.0144972	0.0231102	0.0273128	0.0337836	0.081724	0.135044	0.130428	0.203042	0.257145	0.476011	0.22482	0.465164	0.123111	0.0824412	0.205922	0.287052	0.0849079	0.0440573	0.0489255	0.0876053	0.264878	0.486913	0.0203238	0.0520195	0.25023	0.515647	0.00789741	0.465164	0.100383	0.250725
	16.632	0.0763732	0.198734	0.209809	0.333066	0.353804	0.683232	0.157046	0.334763	0.0969913	0.254214	0.290593	0.497344	0.190368	0.343879	0.0857398	0.273227	0.0412926	0.147712	0.0167366	0.0212361	0.0306423	0.0337478	0.072619	0.122358	0.127987	0.196655	0.246073	0.460822	0.212989	0.453749	0.132922	0.096521	0.186731	0.279988	0.0870522	0.0515115	0.0483568	0.0808033	0.26699	0.523208	0.0178534	0.0518801	0.236987	0.491901	0.00762415	0.453749	0.0947943	0.233901
	16.704	0.074746	0.19326	0.208701	0.327458	0.345859	0.669145	0.15433	0.322577	0.0902215	0.242238	0.273584	0.479524	0.178908	0.338121	0.0796206	0.260327	0.0393848	0.147153	0.0129315	0.0147828	0.0254892	0.0242112	0.0699178	0.11159	0.123934	0.195885	0.238234	0.451833	0.205643	0.451967	0.134343	0.0857369	0.187085	0.291954	0.0841506	0.0510004	0.0496261	0.0785725	0.266817	0.542616	0.0155393	0.0518083	0.225581	0.486464	0.00856924	0.451967	0.0926908	0.228231
	16.776	0.0707836	0.187113	0.210968	0.321761	0.352835	0.679958	0.152182	0.309316	0.0815799	0.243357	0.26478	0.464931	0.167234	0.327431	0.0710207	0.241792	0.0392925	0.140473	0.0117971	0.019412	0.0270668	0.0210702	0.0711091	0.103025	0.122263	0.190972	0.229897	0.45407	0.201417	0.460439	0.128534	0.0797003	0.184699	0.286297	0.0829291	0.0514007	0.0529631	0.0874056	0.264632	0.559426	0.0139945	0.0484964	0.215068	0.481244	0.00681131	0.460439	0.086812	0.215525
	16.848	0.068203	0.184734	0.209013	0.328822	0.315018	0.631492	0.148928	0.293487	0.0733764	0.218791	0.261852	0.450181	0.163682	0.322464	0.064768	0.221671	0.0402985	0.132482	0.00822863	0.01288	0.029584	0.0143411	0.0695695	0.0880637	0.1219	0.183911	0.218638	0.429268	0.194706	0.445876	0.137252	0.092323	0.175223	0.263667	0.0800698	0.0730691	0.0546594	0.0831152	0.276384	0.581952	0.0144304	0.0510806	0.206795	0.474984	0.00867932	0.445876	0.0835473	0.208545
	16.92	0.066814	0.176996	0.199553	0.326565	0.321472	0.650338	0.141594	0.275615	0.072327	0.232156	0.266743	0.455377	0.165615	0.32285	0.0588772	0.206795	0.0431627	0.134876	0.00552656	0.0146295	0.0273924	0.00830866	0.071205	0.0831858	0.1217	0.179239	0.223572	0.451933	0.210754	0.479175	0.125158	0.0625369	0.18904	0.275678	0.0706238	0.0438272	0.0529868	0.0813827	0.254596	0.545452	0.0115764	0.0524862	0.208064	0.482879	0.00971	0.479175	0.0816627	0.207757
	16.992	0.0641272	0.17481	0.199533	0.336069	0.302122	0.60997	0.136118	0.273171	0.0780332	0.21543	0.259481	0.445825	0.160861	0.307869	0.0508223	0.185104	0.039372	0.127255	0.00549923	0.012982	0.0242517	0.00793679	0.0675732	0.0735592	0.117344	0.174559	0.215293	0.439294	0.212043	0.480447	0.139087	0.081671	0.172036	0.246975	0.0699125	0.0497924	0.0464583	0.0772473	0.253841	0.52228	0.0114246	0.0513188	0.202421	0.471655	0.00860482	0.480447	0.075594	0.194179
	17.064	0.0606271	0.172463	0.190909	0.346311	0.306053	0.606924	0.125248	0.264678	0.0767085	0.209243	0.251059	0.428744	0.152491	0.298856	0.0448518	0.165997	0.0347571	0.118528	0.00611579	0.0175274	0.0294171	0.00912849	0.0590516	0.0637694	0.110293	0.17034	0.214499	0.441122	0.212482	0.494421	0.146867	0.0796657	0.158338	0.237763	0.0789266	0.0411014	0.0424899	0.0860551	0.241046	0.475484	0.0102275	0.0484299	0.195669	0.470943	0.0117252	0.494421	0.0691296	0.189937
	17.136	0.0598213	0.171587	0.187636	0.34707	0.318314	0.606272	0.112993	0.250737	0.0822262	0.217445	0.256737	0.435683	0.150672	0.299678	0.03885	0.1501	0.0337606	0.119404	0.00310239	0.0116892	0.0309655	0.00547199	0.0551522	0.062015	0.107955	0.165499	0.220494	0.442403	0.205653	0.496063	0.13664	0.0653653	0.160199	0.243209	0.070867	0.0189443	0.0373888	0.0821653	0.230034	0.446328	0.0106943	0.0469158	0.193572	0.479669	0.01176	0.496063	0.0673949	0.185713
	17.208	0.057408	0.166282	0.181283	0.3383	0.287331	0.564098	0.110538	0.258161	0.0690984	0.189308	0.230864	0.40583	0.145532	0.296505	0.0334553	0.134785	0.0295341	0.107126	0.00166417	0.0072864	0.0315715	0.00779286	0.0537575	0.0553526	0.103498	0.159746	0.210451	0.407794	0.187528	0.460556	0.156686	0.0904381	0.143565	0.21825	0.0758707	0.026321	0.0354946	0.0783491	0.240881	0.441737	0.0130727	0.0425841	0.186294	0.462648	0.0135878	0.460556	0.0653605	0.178002
	17.28	0.0546404	0.156619	0.184234	0.335943	0.286915	0.588934	0.101999	0.243655	0.0729493	0.215336	0.241977	0.421628	0.14371	0.285016	0.0311083	0.126675	0.0296107	0.109528	0	0.00440792	0.0302774	0	0.0503826	0.050207	0.095639	0.151833	0.217087	0.417283	0.177773	0.447143	0.137049	0.0562015	0.153525	0.222186	0.0719789	0.00848445	0.035416	0.0769853	0.235954	0.420311	0.0144032	0.0423099	0.185266	0.475869	0.0180725	0.447143	0.0605958	0.171691
	17.352	0.0495831	0.145537	0.189184	0.322283	0.264079	0.565045	0.100573	0.248292	0.0626495	0.18449	0.216923	0.38887	0.129771	0.27166	0.0294065	0.116468	0.0251556	0.0988667	0.00159227	0.00635231	0.0302776	0.00682179	0.0483228	0.0484981	0.0921	0.150852	0.203306	0.379603	0.165944	0.421557	0.152854	0.0834308	0.133842	0.192351	0.0678132	0.0208067	0.0327078	0.0759847	0.236864	0.415425	0.0140327	0.0400535	0.173743	0.446883	0.0169358	0.421557	0.0584995	0.165293
	17.424	0.0450902	0.127396	0.189205	0.319474	0.274064	0.584267	0.0944839	0.235795	0.071708	0.206385	0.223155	0.39627	0.120258	0.248568	0.0294334	0.11093	0.0250485	0.101773	0.00577174	0.0122111	0.0281322	0.00235945	0.0441276	0.0487844	0.0844035	0.144638	0.203943	0.375563	0.157021	0.411503	0.13528	0.0602382	0.138521	0.187051	0.0551107	0.00529813	0.0318803	0.0689117	0.213335	0.391104	0.0108152	0.0355538	0.165385	0.450592	0.0183032	0.411503	0.054541	0.15459
	17.496	0.0418057	0.120524	0.184849	0.320248	0.271549	0.588399	0.0897	0.231759	0.0638278	0.202817	0.21655	0.388528	0.106073	0.218233	0.027704	0.103943	0.0244975	0.0992343	0.00439572	0.00936733	0.021362	0.00506293	0.0439321	0.0483219	0.0766608	0.137328	0.195415	0.354627	0.140909	0.385373	0.133509	0.064838	0.130518	0.17609	0.0428924	0.00532569	0.027502	0.0645535	0.197383	0.388858	0.0102525	0.0323102	0.152956	0.434725	0.0159059	0.385373	0.053563	0.152231
	17.568	0.0400131	0.112837	0.162738	0.313648	0.256747	0.585079	0.0845695	0.218714	0.0616109	0.203598	0.193743	0.368544	0.0939907	0.192035	0.0275136	0.0993273	0.022273	0.0956036	0.005377	0.0139446	0.0167705	0.00514322	0.0377111	0.0451728	0.0708846	0.131788	0.186797	0.336403	0.13339	0.378591	0.143117	0.0793615	0.121802	0.163756	0.0331819	0.0055936	0.0231259	0.0593924	0.179896	0.371469	0.00855329	0.0301977	0.137938	0.408698	0.0127966	0.378591	0.0515274	0.151809
	17.64	0.038098	0.102726	0.162148	0.320413	0.258403	0.60401	0.07952	0.209214	0.0680496	0.212083	0.201353	0.372186	0.0834348	0.173449	0.0271906	0.0976356	0.0221665	0.0965363	0.00466571	0.0127643	0.0122279	0.00772658	0.0336078	0.0417816	0.0609191	0.124997	0.187379	0.343875	0.131854	0.37989	0.129742	0.0612276	0.124049	0.162813	0.0256991	0.00123134	0.0225647	0.0654769	0.155898	0.338399	0.00483367	0.0236172	0.131175	0.401205	0.0112648	0.37989	0.051418	0.141666
	17.712	0.0355625	0.0983788	0.158387	0.305686	0.223281	0.542739	0.0723387	0.210139	0.0640627	0.19754	0.17826	0.358603	0.0749479	0.157718	0.0265601	0.0888094	0.0196594	0.0876402	0.00659628	0.0122171	0.00688108	0.0148309	0.0344474	0.036211	0.0590144	0.122146	0.17581	0.3129	0.124936	0.364722	0.141016	0.0847044	0.108693	0.140574	0.0227378	0.019962	0.0202025	0.0619845	0.149606	0.308023	0.00453081	0.018517	0.11815	0.369557	0.0100467	0.364722	0.0494068	0.135881
	17.784	0.0336832	0.0906315	0.154013	0.306509	0.223188	0.524989	0.0686687	0.197455	0.0777329	0.219227	0.175411	0.358197	0.0751603	0.149987	0.0261991	0.0847419	0.0190751	0.0899871	0.0100197	0.0139328	0.00172814	0.020525	0.0324076	0.0334964	0.0493288	0.112819	0.174075	0.316298	0.131111	0.377949	0.132823	0.074896	0.1104	0.144609	0.0168262	0.0160754	0.01836	0.0596369	0.127041	0.271161	0.00376887	0.0142423	0.114067	0.363809	0.0122558	0.377949	0.0464116	0.131979
	17.856	0.0320628	0.0883908	0.155016	0.31811	0.19671	0.470664	0.065453	0.197003	0.0815934	0.216076	0.160585	0.355229	0.0724076	0.140003	0.0236545	0.0778829	0.016738	0.0881542	0.010372	0.00714063	0	0.0301216	0.0334499	0.0354486	0.0474367	0.111636	0.165043	0.308497	0.133516	0.378585	0.136696	0.0788706	0.110438	0.141022	0.0134623	0.0204209	0.0148767	0.0514144	0.122558	0.252217	0.00425845	0.0134608	0.108979	0.349154	0.00996264	0.378585	0.0479842	0.132595
	17.928	0.0309784	0.0845116	0.15166	0.332603	0.175853	0.443155	0.0654304	0.204709	0.0799902	0.206156	0.157954	0.339358	0.0713082	0.127469	0.0217426	0.0751465	0.0152492	0.0827825	0.011487	0.0143352	0.00190916	0.0392389	0.0328916	0.034969	0.0417549	0.104236	0.152142	0.289011	0.139994	0.405139	0.152009	0.093397	0.102236	0.131203	0.0113691	0.0235381	0.0128638	0.0469996	0.11271	0.232182	0.00232035	0.00898961	0.101038	0.326805	0.0102382	0.405139	0.045738	0.134336
	18	0.0302583	0.0822418	0.166336	0.368892	0.170546	0.438795	0.0672618	0.208911	0.0830423	0.202406	0.166366	0.339966	0.0720595	0.130834	0.0225204	0.0757033	0.0148282	0.081501	0.0117416	0.0113972	0.00763746	0.0440317	0.0306604	0.030359	0.0375169	0.0963912	0.155154	0.296445	0.141062	0.428574	0.137043	0.0707506	0.102402	0.13747	0.0139827	0.0276634	0.0137256	0.0476523	0.0945476	0.195712	0.000720768	0.00672738	0.0970372	0.319509	0.00657826	0.428574	0.0437934	0.137809
	18.072	0.027805	0.0746247	0.163742	0.375619	0.138874	0.383809	0.0567945	0.207725	0.0758186	0.193905	0.138657	0.311011	0.0640087	0.116837	0.0201751	0.070328	0.0129642	0.0738309	0.00986979	0.0119036	0.00890887	0.0480075	0.034489	0.0383445	0.0376891	0.0979481	0.138194	0.25751	0.130551	0.396657	0.151789	0.100548	0.0910033	0.13091	0.0174134	0.0255428	0.0104359	0.0363684	0.0936622	0.19085	0	0.00453597	0.0895016	0.291183	0.00202063	0.396657	0.0357835	0.136861
	18.144	0.0265111	0.0727145	0.169255	0.409734	0.149831	0.413974	0.0561101	0.195154	0.0774079	0.208332	0.150835	0.328311	0.0674891	0.130416	0.020778	0.0717958	0.015515	0.07601	0.0126062	0.0141539	0.0199967	0.0545329	0.0305832	0.0327587	0.0329844	0.0876992	0.144472	0.277804	0.126553	0.410652	0.130994	0.0651682	0.104812	0.152239	0.0204845	0.00421679	0.00976577	0.0396395	0.0738851	0.150854	0.00147829	0.00626607	0.0920754	0.29133	0.00191777	0.410652	0.0309106	0.127724
	18.216	0.0236428	0.0675102	0.167834	0.42807	0.137575	0.371806	0.0586882	0.196125	0.0708409	0.207748	0.12148	0.308101	0.0580126	0.117823	0.0213277	0.0676973	0.0128281	0.0719407	0.00839957	0.00797323	0.02212	0.0592272	0.0328574	0.032682	0.0303509	0.0870724	0.134099	0.254869	0.114029	0.386076	0.133456	0.0768974	0.0951612	0.135428	0.0243157	0.00161688	0.00922656	0.0379563	0.0631108	0.131856	0.00155915	0.0033514	0.087499	0.262644	0	0.386076	0.0244238	0.114842
	18.288	0.0228482	0.0645221	0.184474	0.466936	0.143479	0.373035	0.0625566	0.189416	0.0640671	0.196626	0.114579	0.301549	0.0501821	0.110503	0.0237986	0.0706993	0.0112495	0.0694349	0.0101619	0.0139514	0.0313709	0.0654231	0.0312842	0.0221166	0.0285303	0.0814968	0.125455	0.23904	0.105461	0.37873	0.122378	0.0701059	0.0895568	0.121687	0.0289316	0.0101249	0.0089362	0.0367581	0.0490669	0.104544	0.0017433	0.00373365	0.0840929	0.234283	0.00397114	0.37873	0.0244155	0.097397
	18.36	0.0210591	0.0571157	0.1914	0.499103	0.140699	0.359686	0.0567882	0.172771	0.0567764	0.20371	0.109917	0.305489	0.049983	0.105324	0.0244232	0.0645149	0.0106744	0.0719073	0.0110177	0.0121248	0.0325506	0.0687057	0.0306282	0.0203764	0.023374	0.0807247	0.122228	0.235749	0.100869	0.367364	0.11314	0.0587864	0.0969088	0.125045	0.0176447	0.000957174	0.00776333	0.0331373	0.0471291	0.101987	0.00443083	0.00705326	0.0779098	0.219375	0.00882137	0.367364	0.0202418	0.0907315
	18.432	0.0192986	0.0485458	0.203779	0.508981	0.118148	0.339902	0.0553123	0.165824	0.0493623	0.190556	0.0926858	0.280891	0.0458139	0.0999261	0.0234221	0.0581059	0.0071157	0.0672047	0.00914358	0.0121427	0.0335109	0.075218	0.0318784	0.0171281	0.0206618	0.078876	0.111561	0.210118	0.102589	0.361861	0.116459	0.0690397	0.0862058	0.119403	0.0154291	0.00392643	0.00726211	0.0286185	0.0439866	0.109636	0.00472634	0.00253757	0.0697374	0.190512	0.0168621	0.361861	0.0244008	0.0967028
	18.504	0.0184172	0.0437464	0.213484	0.525167	0.124859	0.361868	0.0495137	0.161027	0.0510403	0.195659	0.0925197	0.287755	0.048939	0.112918	0.022158	0.0550241	0.00615122	0.067905	0.00976661	0.0136336	0.0401734	0.0818941	0.0239127	0.00749726	0.015328	0.0724488	0.111706	0.213392	0.104064	0.371598	0.0939743	0.04791	0.0805756	0.126016	0.0109919	0	0.00758652	0.0306167	0.0365752	0.09764	0.00415223	0.00142657	0.0649422	0.173599	0.0255203	0.371598	0.0192055	0.0936556
	18.576	0.0197344	0.0447989	0.215761	0.508689	0.111152	0.324633	0.0534878	0.169718	0.0472852	0.179666	0.0654075	0.257861	0.0435321	0.100954	0.0195599	0.0513732	0.00444816	0.0596467	0.00910817	0.00414207	0.035008	0.084146	0.0228374	0.0129836	0.0125562	0.0679186	0.0953575	0.175604	0.0946113	0.357992	0.0909759	0.0504307	0.0641735	0.105407	0.0139468	0.0167385	0.00523024	0.0272848	0.0328314	0.0998948	0.00307383	0	0.0630004	0.157005	0.0230176	0.357992	0.0155229	0.0990036
	18.648	0.0176785	0.0401029	0.22645	0.49849	0.127297	0.351079	0.0492185	0.169226	0.0525722	0.1821	0.0703967	0.267362	0.0477046	0.106068	0.0188344	0.0529422	0.00377454	0.0629173	0.0131616	0.00966769	0.0391435	0.0882617	0.0157685	0.00178923	0.00728196	0.0594589	0.0916408	0.179939	0.0941378	0.415236	0.0753746	0.0325848	0.0730119	0.116769	0.0206002	0.0133587	0.00420805	0.0265153	0.0260996	0.08849	0.000563456	0.00252571	0.0595916	0.14279	0.0275309	0.415236	0.0168865	0.0941145
	18.72	0.0159391	0.03619	0.216379	0.466382	0.113282	0.341416	0.0509502	0.164898	0.0476248	0.181353	0.0667029	0.270661	0.0415829	0.0813255	0.0170755	0.0503309	0.00360991	0.0639071	0.014085	0.00558335	0.0364567	0.092539	0.00987403	0.0121059	0.00712908	0.0591725	0.079927	0.159346	0.0930399	0.451816	0.0751342	0.0385848	0.0773241	0.119121	0.0196901	0.00839012	0.00235562	0.019021	0.0287644	0.085034	0.00320983	0.00791315	0.0564044	0.12991	0.0239387	0.451816	0.013798	0.0902069
	18.792	0.0144024	0.0326486	0.195004	0.425095	0.0997329	0.342835	0.056334	0.172476	0.0370873	0.158555	0.0571885	0.262409	0.0356505	0.0590868	0.0151814	0.0494503	0.00374099	0.0654335	0.0137521	0.0106312	0.0322712	0.0923634	0.00425041	0.00608624	0.00356615	0.0515743	0.0726887	0.15	0.0993312	0.481875	0.0736403	0.0385946	0.0747396	0.117704	0.0102401	0.00341276	0.00263258	0.0176811	0.0186918	0.0599865	0.005718	0.00968141	0.0537376	0.119362	0.0210336	0.481875	0.0137815	0.0786977
	18.864	0.0135237	0.035014	0.175529	0.401909	0.106811	0.358896	0.0577809	0.165132	0.0306329	0.153401	0.0643662	0.278869	0.0289657	0.0427123	0.0124182	0.0493366	0.00418639	0.0671342	0.0164839	0.02012	0.0335715	0.0979885	0	0	0.00553886	0.0480041	0.0642047	0.131799	0.102341	0.494678	0.0632853	0.0323726	0.0673321	0.103989	0.0103518	0.0211993	0.000591705	0.0123657	0.0193222	0.0481831	0.0116506	0.0173247	0.0487705	0.0952373	0.0199026	0.494678	0.0130165	0.068211
	18.936	0.0107347	0.0299422	0.147234	0.353192	0.0863708	0.306111	0.0453257	0.149829	0.0212851	0.13761	0.0424191	0.258254	0.0219067	0.0234199	0.00932176	0.0412496	0.00400548	0.0662617	0.0145499	0.011683	0.0336613	0.0985995	0.0143806	0.0219625	0.00518005	0.0443925	0.0542785	0.111557	0.096534	0.443453	0.0696993	0.0472846	0.0622457	0.0990741	0.00109515	0.0103576	0.000205581	0.00806952	0.03031	0.0591915	0.0175649	0.0217813	0.0549625	0.0987737	0.0154566	0.443453	0.0077745	0.0510896
	19.008	0.00957366	0.0277983	0.128629	0.331514	0.106942	0.33637	0.0394816	0.135377	0.0153171	0.127659	0.0545064	0.276687	0.0247111	0.0221735	0.00971365	0.0402976	0.00586308	0.0688775	0.0193172	0.0249301	0.038994	0.0981254	0.00427852	0.00606184	0.00487598	0.0418701	0.0492437	0.110584	0.101624	0.457989	0.0575118	0.037073	0.0613268	0.0974366	0.00146009	0.00799322	0.000262468	0.00537259	0.0213018	0.0416295	0.0217594	0.0281886	0.0533076	0.081818	0.0184525	0.457989	0.00877902	0.0468716
	19.08	0.00787032	0.0248927	0.107269	0.304607	0.0934728	0.313224	0.0327088	0.11516	0.00799522	0.110703	0.0387924	0.250647	0.0267325	0.018971	0.00826568	0.0338487	0.00626465	0.0675197	0.0229516	0.0241773	0.0456628	0.0974364	0.0217126	0.0218741	0.0046388	0.0381788	0.0420324	0.0972251	0.0865046	0.412069	0.057632	0.0402919	0.0489963	0.0772111	3.68295e-05	0.0088984	0.00074062	0.0064659	0.0224786	0.0430264	0.0276979	0.0329705	0.0582848	0.0850576	0.0183481	0.412069	0.00459935	0.0290834
	19.152	0.00761204	0.024905	0.090461	0.294888	0.0916105	0.316019	0.0275312	0.0935126	0.00641285	0.106131	0.0380974	0.264362	0.0314043	0.0214043	0.00812208	0.0271567	0.00641241	0.0689958	0.0281809	0.0246142	0.0538453	0.100381	0.015715	0.0129625	0.0015671	0.0324826	0.0384011	0.0909638	0.0827323	0.404323	0.0469366	0.0424821	0.0453617	0.0755842	0	0.00530637	0.000937635	0.00240938	0.0147693	0.0268805	0.0325368	0.0411969	0.0555682	0.0746303	0.0233834	0.404323	0.00565885	0.0207263
	19.224	0.00746894	0.0224982	0.0759445	0.314206	0.0935107	0.326974	0.0268048	0.0791331	0.0017576	0.0988479	0.0416056	0.269947	0.0321475	0.0279357	0.00859081	0.0246117	0.00742381	0.066274	0.0336157	0.0277511	0.0596274	0.103849	0.0142046	0.0112832	0.00359987	0.0354713	0.033979	0.0788156	0.0774196	0.377994	0.0399824	0.041316	0.0276717	0.0577815	0.0105762	0.0346932	0	0	0.0115113	0.0193147	0.0381037	0.0518287	0.0486496	0.0612524	0.030536	0.377994	0.00486158	0.0163473
	19.296	0.00622516	0.0183874	0.0572975	0.302932	0.0651581	0.288573	0.0254627	0.0657539	0.00145673	0.101152	0.0534181	0.260781	0.0281905	0.0289476	0.00665586	0.018007	0.00916158	0.0609724	0.0283484	0.0147748	0.0630442	0.103754	0.0292479	0.0274327	0	0.0303978	0.0315618	0.0760358	0.0699287	0.32601	0.0532395	0.0584748	0.0332041	0.0636012	0.00434558	0.0202058	0.00155065	0.00325014	0.0162739	0.0343669	0.0401513	0.0587354	0.0452951	0.0645291	0.0272161	0.32601	0.00143736	0.00851436
	19.368	0.00531503	0.0145393	0.0432724	0.303297	0.061991	0.306946	0.0248139	0.0632255	0.000435757	0.105693	0.0656203	0.276908	0.0240214	0.027021	0.00627862	0.0154837	0.0108241	0.0577468	0.0261707	0.0147064	0.0692442	0.110843	0.0216405	0.0251191	0.00233323	0.0286373	0.0290897	0.0727845	0.0636568	0.29414	0.0449263	0.0561447	0.018491	0.0522315	0.00727246	0.0256127	0.000975852	0.000793396	0.00881638	0.0122324	0.0424195	0.0658053	0.0305839	0.0456313	0.0315182	0.29414	0.0030812	0.00461197
	19.44	0.00466781	0.013223	0.0342004	0.289497	0.0478174	0.285577	0.0199412	0.0543587	0.000597478	0.0986179	0.0515199	0.265825	0.0176056	0.0206142	0.00509695	0.0118855	0.010314	0.0547445	0.0191041	0.00499972	0.0691088	0.105979	0.0376172	0.0441338	0.00426691	0.0239621	0.0254275	0.0608451	0.0501237	0.231529	0.0633469	0.0710544	0.0138959	0.0407713	0.00756953	0.0431146	0.00384455	0.00743999	0.00875981	0.0267484	0.0449648	0.0720018	0.0263024	0.0418551	0.0338805	0.231529	0.00245711	0
	19.512	0.00443821	0.0129305	0.0285613	0.287678	0.0530304	0.312438	0.0225109	0.0569271	0.00205883	0.0911156	0.0411887	0.277382	0.0135068	0.0188884	0.00393858	0.0101194	0.00952476	0.0515684	0.0202346	0.00611946	0.0740644	0.103258	0.0221193	0.0253062	0.00749244	0.0197676	0.0228067	0.0546648	0.0401604	0.208077	0.0403174	0.0444714	0.00224226	0.0207996	0.0202885	0.0651248	0.00357988	0.00740005	0	0	0.0527495	0.0860127	0.0180285	0.028579	0.0407016	0.208077	0.00521001	0.00195402
	19.584	0.00327861	0.0104089	0.0244855	0.269403	0.0554409	0.306559	0.020986	0.0384472	0	0.0750076	0.030099	0.264403	0.00648667	0.0133824	0.00306979	0.00787143	0.010961	0.0494209	0.0190058	0.00906352	0.0734356	0.10088	0.034486	0.0387884	0.00698642	0.0168255	0.0198334	0.0448739	0.0289578	0.151543	0.046893	0.0525284	0.00742029	0.0254027	0.0199263	0.0717159	0.00505234	0.0113171	0.00388373	0.0111948	0.0537294	0.0925249	0.0163463	0.029417	0.0442636	0.151543	0.00773733	0.00686172
	19.656	0.00242369	0.00838408	0.0186278	0.269214	0.053628	0.271696	0.0198977	0.0288608	0.00192785	0.0765157	0.0301137	0.256307	0.00323804	0.01215	0.00145902	0.00530817	0.0120932	0.0467928	0.0163555	0.00195558	0.0771234	0.103873	0.0384016	0.043923	0.00813693	0.01491	0.0170916	0.0376287	0.0204124	0.107361	0.0406045	0.0515954	0.0228007	0.0401257	0.0195477	0.0561056	0.00563679	0.0152034	0.00693516	0.0198031	0.0568363	0.0971473	0.0140435	0.0254538	0.0458217	0.107361	0.0103418	0.012243
	19.728	0.00229386	0.0084306	0.00975164	0.2791	0.0586467	0.268915	0.0141568	0.0233071	0.00580008	0.0619714	0.0252921	0.254457	0.00232813	0.0103737	0.00120544	0.00496439	0.011267	0.0391966	0.0179661	0.00697862	0.0773828	0.0996171	0.0283357	0.0262857	0.00887824	0.0139744	0.0114866	0.0256084	0.0151301	0.0627049	0.0279325	0.0398606	0.0167478	0.0249377	0.0247242	0.0754747	0.00659749	0.0152792	0.00920038	0.0253773	0.0621952	0.106511	0.00982901	0.0169507	0.0488457	0.0627049	0.012777	0.0173223
	19.8	0.00170176	0.0054015	0.00118576	0.276513	0.0360572	0.216356	0.0078672	0.0146968	0.0133404	0.047792	0.0113926	0.232509	0	0.00284159	0.00144557	0.0037434	0.00924845	0.0263494	0.0201203	0	0.0744886	0.0998285	0.0364351	0.047398	0.0106088	0.0071094	0.00610534	0.010103	0.0126497	0.0143023	0.0363554	0.0431143	0.0150026	0.0118847	0.0291632	0.0837347	0.0106171	0.0365895	0.0122809	0.0439209	0.0635632	0.108132	0.00999623	0.0272859	0.0494899	0.0143023	0.00575718	0.0155444
	19.872	0.00156024	0.00432994	0	0.288168	0.0305084	0.214047	0.00616967	0.010643	0.0236535	0.0494976	0.0172838	0.239881	0.00221739	0.00812003	0.000539327	0.00243943	0.00812322	0.0181685	0.0243303	0.00250093	0.0787419	0.109326	0.0219729	0.0315291	0.012304	0.00772659	0.00495498	0.0136414	0.011993	0.0153542	0.0166287	0.0216683	0.0192235	0.0185096	0.0239864	0.0686447	0.0102461	0.0358291	0.0196732	0.06257	0.0661662	0.113253	0.00462533	0.0175631	0.0532022	0.0153542	0.00679397	0.0271264
	19.944	0.000584392	0.0015853	0.00215666	0.264469	0.0151146	0.188126	0.00248791	0.00712225	0.0210016	0.0319847	0	0.218495	0.000501463	0.000874315	0.000149359	0.00199717	0.00409079	0.0073506	0.0251802	0.000476988	0.0783533	0.109373	0.0238374	0.0409946	0.00920181	0.00289599	0	0	0.00501424	0	0.0179482	0.0173713	0	0	0.0266469	0.0663709	0.0134212	0.0574193	0.0226631	0.0818701	0.0639782	0.114602	0.00583335	0.0212359	0.0496779	0	0	0.0277377
	20.016	0	0	0.00535921	0.253973	0	0.16312	0	0	0.0184394	0.0401384	0.000655485	0.219544	0.000193493	0	0	0	0	0	0.0237132	0.00345212	0.0873553	0.125818	0.0246572	0.040292	0.00918249	0	0.000571316	0.00642676	0	0.00316264	0	0	0.00191562	0.00775175	0.0352763	0.0527801	0.0137728	0.0590037	0.0293467	0.08764	0.0646424	0.119064	0	0.00480572	0.0532002	0.00316264	0.000301977	0.0327456
[truncated: 273 more columns]

## Sheet: Figure 8B
Figure 8B
(mm/s)		Data for the plot																							Raw data
			Distance from Golgi (um)			Control						KIF13B-KO					4X-KO + GFP-KIF13B					MAP7KO+D1D3KD				Control
			3	1.2105	1.4135	1.3996	1.5548	1.1197		1.4772	1.3414	1.3386	1.3998	1.3412		1.7657	1.7688	1.6976		1.7483	1.5794	1.8922	1.9718			3 mm range	Velocity (mm/s)		5 mm range	Velocity (mm/s)		7 mm range	Velocity (mm/s)		9 mm range	Velocity (mm/s)		11 mm range	Velocity (mm/s)		13 mm range	Velocity (mm/s)		15 mm range	Velocity (mm/s)		17 mm range	Velocity (mm/s)
			5	1.418	1.3453	1.3663	1.4704	1.5198		1.4165	1.4372	1.31	1.4134	1.3444		1.6782	1.7542	1.6801		1.6782	1.4967	1.5768	1.6448			4.861	1.217		5.123	1.331		7.004	1.292		9.012	1.254		11.046	0.794		13.007	1.02		15.006	1.584		17.017	2.182
			7	1.258	1.3311	1.4152	1.4156	1.4837		1.3367	1.3714	1.2635	1.3951	1.355		1.637	1.6878	1.629		1.5527	1.4094	1.6586	1.6376			4.987	1.204		5.19	1.299		7.041	1.299		9.014	1.75		11.048	0.827		13.019	1.069		15.008	1.178		17.019	1.056
			9	1.2668	1.3309	1.3639	1.4535	1.4383		1.3803	1.2438	1.2784	1.3754	1.3513		1.6628	1.654	1.6474		1.5379	1.5032	1.703	1.7427						5.276	1.266		7.042	1.062		9.017	1.767		11.059	1.078		13.024	1.035		15.015	0.81		17.031	1.337
			11	1.2711	1.3182	1.4459	1.4026	1.4192		1.3844	1.2454	1.2742	1.3872	1.3405		1.6138	1.6473	1.6444		1.4889	1.4925	1.6278	1.6491			2.814	1.136		5.292	1.227		7.064	2.096		9.038	1.278		11.06	1.164		13.025	1.135		15.03	1.386		17.035	2.497
			13	1.3017	1.3004	1.3442	1.394	1.3745		1.319	1.2097	1.3196	1.3471	1.2933		1.6483	1.6746	1.6806		1.4422	1.4928	1.7932	1.629			2.855	1.628		5.326	1.765		7.079	1.51		9.046	1.688		11.06	2		13.027	1.042		15.09	3.001		17.048	0.611
			15	1.3435	1.3069	1.3996	1.3745	1.4299		1.3457	1.1879	1.2854	1.353	1.3608		1.6524	1.6955	1.7026		1.5626	1.4609	1.5214	1.5596			2.878	1.197		5.357	1.547		7.085	0.679		9.047	2.842		11.066	1.171		13.052	1.89		15.094	1.317		17.066	1.441
			17	1.3632	1.2773	1.3639	1.4155	1.3958		1.3091	1.1444	1.2671	1.3543	1.3395		1.5346	1.7118	1.6335		1.512	1.4198	1.4712	1.5865			3.074	1.292		5.429	1.964		7.096	1.36		9.055	1.238		11.079	1.432		13.057	1.219		15.111	0.908		17.106	2.27
			19	1.2665	1.2573	1.3698	1.4026	1.3551		1.269	1.1747	1.3339	1.3379	1.3201		1.4463	1.7874	1.5577		1.4325	1.4635	1.4249	1.6126			3.09	1.128		5.512	1.841		7.097	1.283		9.056	0.999		11.104	0.881		13.067	1.32		15.114	1.096		17.109	0.667
			21	1.3659	1.3295	1.4169	1.3654	1.4077		1.3259	1.0105	1.2681	1.2932	1.2818		1.384	1.5721	1.6207		1.5166	1.5874	1.4	1.354			3.099	2.548		5.531	1.19		7.112	2.188		9.079	2.748		11.111	0.75		13.072	1.003		15.129	0.87		17.115	0.99
			23	1.3158	1.4028	1.4373	1.321	1.436		1.2618	0.93	1.2973	1.3378	1.2595		1.489	1.8255	1.6637		1.6195	1.4792	1.6299	1.3831			3.134	0.947		5.608	1.33		7.137	1.304		9.081	1.008		11.126	0.946		13.109	1.427		15.143	1.051		17.128	1.263
																										3.163	1.423		5.634	1.373		7.138	1.225		9.106	1.398		11.152	1.43		13.114	1.252		15.151	1.44		17.14	1.191
																										3.192	1.398		5.664	0.888		7.14	1.249		9.129	1.539		11.17	0.989		13.12	1.359		15.16	1.449		17.141	1.479
																										3.236	0.968		5.666	1.279		7.142	1.29		9.129	1.128		11.19	1.058		13.126	0.902		15.168	1.469		17.152	2.238
																										3.307	1.344		5.769	1.162		7.15	1.419		9.129	1.115		11.197	1.073		13.128	1.684		15.17	1.233		17.171	1.511
																										3.319	1.692		5.788	1.286		7.15	0.755		9.134	0.588		11.217	1.458		13.134	1.184		15.187	1.366		17.19	1.135
																										3.437	1.138		5.799	1.269		7.153	2.077		9.135	1.187		11.218	1.245		13.139	1.372		15.188	1.111		17.211	1.3
																										3.437	1.403		5.812	1.677		7.16	1.312		9.143	0.801		11.225	1.341		13.145	1.039		15.194	1.243		17.216	1.07
																										3.467	1.553		5.836	1.256		7.166	1.219		9.165	1.17		11.229	1.045		13.153	2.184		15.23	1.055		17.255	0.978
																										3.525	0.915		5.898	1.317		7.169	1.612		9.165	1.122		11.233	0.964		13.155	2.26		15.248	1.699		17.266	1.355
																										3.56	1.261		5.92	1.719		7.195	0.939		9.175	1.326		11.235	1.261		13.161	1.279		15.251	1.367		17.27	1.174
																										3.605	1.616		5.927	1.33		7.217	1.719		9.176	1.101		11.236	1.571		13.167	1.99		15.268	1.355		17.335	1.303
																										3.657	1.602		5.947	1.339		7.23	1.073		9.179	1.438		11.243	1.324		13.171	2.184		15.321	0.922		17.365	1.388
																										3.658	1.424		5.949	1.286		7.247	1.181		9.187	1.186		11.251	0.826		13.173	1.336		15.353	1.119		17.413	0.863
																										3.725	1.227		5.949	1.544		7.275	2.506		9.19	0.712		11.261	1.15		13.178	1.8		15.361	3.278		17.419	1.132
																										3.752	1.651		5.98	1.952		7.329	0.801		9.196	1.119		11.265	1.236		13.185	2.277		15.37	1.274		17.439	1.425
																										3.765	1.184		5.998	1.36		7.337	1.42		9.2	0.703		11.267	1.289		13.185	1.149		15.4	0.803		17.442	0.799
																										3.915	1.43		6.019	1.622		7.341	1.378		9.212	1.192		11.276	1.683		13.206	1.171		15.405	1.275		17.466	1.651
																										3.935	1.065		6.026	1.061		7.345	1.365		9.218	1.158		11.279	0.822		13.21	1.067		15.406	1.151		17.491	2.484
																										3.946	1.494		6.069	1.269		7.348	1.115		9.221	1.098		11.286	1.039		13.225	0.893		15.408	1.297		17.55	1.744
																										3.988	1.034		6.107	1.216		7.363	0.986		9.223	1.389		11.289	3.024		13.23	0.868		15.409	0.679		17.558	1.264
																										3.999	0.652		6.109	1.254		7.377	0.963		9.224	2.339		11.292	1.377		13.245	0.958		15.412	1.593		17.584	1.484
																										4.018	1.441		6.115	1.278		7.379	1.462		9.228	1.739		11.296	0.861		13.247	1.233		15.451	1.367		17.614	0.875
																										4.049	1.05		6.159	1.078		7.385	1.66		9.231	0.908		11.298	1.256		13.249	1.462		15.467	1.178		17.648	1.244
																										4.065	1.267		6.176	1.567		7.386	0.945		9.234	1.092		11.323	1.034		13.254	0.966		15.468	1.283		17.653	1.342
																										4.065	3.239		6.254	1.239		7.407	2.664		9.235	1.377		11.331	0.854		13.264	2.076		15.484	0.634		17.66	2.372
																										4.085	1.084		6.265	1.611		7.413	1.105		9.252	1.438		11.343	1.21		13.277	0.965		15.499	1.2		17.68	1.727
																										4.148	1.483		6.288	3.025		7.413	1.332		9.255	1.151		11.353	1.118		13.288	1.568		15.503	1.625		17.684	1.183
																										4.179	1.29		6.303	1.247		7.425	1.438		9.266	1.173		11.364	1.543		13.305	1.186		15.506	2.304		17.778	0.955
																										4.196	2.007		6.313	1.096		7.429	1.338		9.276	0.996		11.37	2.738		13.305	1.71		15.522	2.478		17.781	1.326
																										4.214	1.726		6.355	1.234		7.434	1.118		9.282	1.264		11.413	1.476		13.309	1.308		15.538	1.515		17.79	1.094
																										4.216	1.166		6.361	1.487		7.436	0.835		9.287	1.183		11.414	1.234		13.317	1.131		15.568	0.938		17.799	1.201
																										4.218	2.504		6.361	1.751		7.469	1.521		9.294	1.168		11.415	1.259		13.343	2.431		15.571	1.736		17.849	1.342
																										4.238	1.583		6.394	1.695		7.498	1.209		9.311	1.061		11.417	1.257		13.362	1.199		15.587	0.712		17.85	1.198
																										4.263	0.857		6.414	1.416		7.515	1.542		9.324	1.074		11.452	1.05		13.368	1.057		15.594	0.971		17.862	1.152
																										4.28	1.37		6.423	0.636		7.537	1.444		9.337	1.399		11.453	0.973		13.377	1.231		15.626	1.307		17.863	2.121
																										4.289	1.057		6.439	1.484		7.542	1.317		9.34	1.256		11.466	1.054		13.406	0.872		15.638	1.204		17.875	0.925
																										4.3	1.502		6.48	1.291		7.544	1.367		9.366	1.201		11.47	1.287		13.409	1.254		15.679	1.822		17.898	1.633
																										4.309	1.078		6.492	1.502		7.548	1.207		9.367	1.605		11.475	1.319		13.43	1.512		15.679	0.967		17.902	1.064
																										4.318	1.515		6.503	1.022		7.548	1.498		9.377	1.666		11.478	1.274		13.441	1.755		15.689	1.689		17.922	1.493
																										4.319	1.76		6.518	1.039		7.551	1.593		9.38	1.207		11.491	0.996		13.446	0.93		15.701	0.906		17.925	1.144
																										4.336	0.768		6.531	2.86		7.553	1.379		9.394	1.904		11.491	1.693		13.449	0.875		15.704	0.975		17.934	1.381
																										4.354	1.084		6.549	1.41		7.555	1.483		9.407	1.122		11.498	1.203		13.46	1.265		15.709	0.995		17.965	1.886
																										4.393	1.381		6.552	1.173		7.562	1.102		9.429	1.255		11.501	0.885		13.47	1.194		15.71	2.179		17.966	1.591
																										4.4	1.209		6.606	1.007		7.563	0.786		9.432	1.159		11.518	1.943		13.475	1.418		15.748	1.1		17.994	1.698
																										4.42	1.096		6.615	1.437		7.57	1.295		9.433	1.414		11.537	1.33		13.479	1.165		15.761	2.158		18.011	1.816
																										4.439	0.996		6.623	1.414		7.584	0.82		9.457	1.207		11.542	1.462		13.495	1.143		15.79	0.945		18.026	0.767
																										4.439	1.212		6.635	1.366		7.589	0.891		9.466	0.727		11.55	0.789		13.525	1.286		15.793	0.786		18.04	0.985
																										4.459	1.377		6.648	2.142		7.605	0.795		9.506	1.47		11.554	0.913		13.537	1.028		15.814	1.049		18.041	1.88
																										4.519	0.795		6.667	1.358		7.605	1.805		9.521	1.567		11.564	1.176		13.555	1.063		15.815	1.685		18.068	0.927
																										4.527	1.144		6.674	1.076		7.61	1.417		9.527	1.213		11.569	1.436		13.579	0.88		15.848	1.69		18.071	1.441
																										4.554	1.312		6.69	0.835		7.612	1.355		9.527	1.524		11.585	1.216		13.615	0.801		15.866	1.841		18.078	1.145
																										4.568	1.251		6.74	1.26		7.615	0.7		9.533	1.099		11.588	1.283		13.621	1.493		15.871	0.998		18.083	2.023
																										4.572	1.771		6.75	1.292		7.622	1.225		9.536	1.459		11.63	1.235		13.646	0.977		15.872	0.815		18.141	1.334
																										4.582	0.925		6.756	1.208		7.629	0.976		9.54	0.857		11.641	1.262		13.65	0.929		15.887	0.957		18.159	0.546
																										4.594	0.946		6.767	1.14		7.637	1.279		9.543	1.131		11.672	1.348		13.653	0.766		15.892	1.313		18.168	1.436
																										4.62	1.964		6.768	0.722		7.688	1.211		9.548	0.867		11.673	0.866		13.658	1.071		15.895	1.827		18.175	0.813
																										4.629	1.519		6.779	1.306		7.689	1.22		9.549	1.195		11.677	1.102		13.663	0.902		15.915	1.157		18.187	1.1
																										4.633	1.53		6.799	2.349		7.69	2.429		9.558	1.231		11.702	1.272		13.663	1.182		16.007	1.127		18.193	2.019
																										4.638	2.15		6.807	1.492		7.699	1.774		9.564	2.54		11.704	1.15		13.699	1.372		16.007	1.06		18.206	1.514
																										4.686	1.242		6.809	1.38		7.721	1.435		9.582	1.093		11.708	0.745		13.707	1.252		16.02	2.105		18.206	0.96
																										4.709	1.41		6.813	0.949		7.723	1.205		9.584	0.705		11.727	0.808		13.743	1.46		16.054	0.85		18.219	0.861
																										4.713	3.338		6.82	1.675		7.724	1.298		9.584	1.239		11.746	0.921		13.774	1.174		16.077	1.057		18.221	1.508
																										4.723	1.509		6.858	2.258		7.728	1.383		9.586	1.393		11.749	1.019		13.798	1.318		16.078	1.66		18.225	1.109
																										4.732	1.267		6.892	1.207		7.731	1.087		9.594	1.566		11.766	1.209		13.808	0.844		16.083	1.061		18.251	1.421
																										4.75	1.384		6.916	0.905		7.733	0.765		9.597	1.162		11.791	1.238		13.83	1.945		16.104	0.772		18.267	1.786
																										4.757	2.07		6.92	1.197		7.734	0.829		9.616	0.923		11.812	0.897		13.833	1.162		16.109	1.187		18.269	0.966
																										4.759	1.079		6.939	1.477		7.745	0.768		9.616	1.498		11.814	1.041		13.838	1.303		16.111	1.069		18.272	1.477
																										4.763	1.087		6.964	1.166		7.746	1.173		9.654	1.408		11.822	0.979		13.845	1.252		16.114	1.137		18.31	1.157
																										4.798	1.538		6.984	1.812		7.748	1.041		9.656	1.525		11.829	1.61		13.846	1.242		16.177	0.97		18.312	1.176
																										4.805	2.519		6.993	1.386		7.756	1.213		9.717	1.173		11.836	0.895		13.864	1.225		16.178	1.246		18.324	0.771
																										4.805	1.265		6.994	2.682		7.767	0.854		9.718	1.257		11.866	1.588		13.87	1.515		16.195	0.729		18.324	1.73
																										4.817	0.786					7.781	1.175		9.721	1.62		11.88	1.274		13.88	0.829		16.196	2.022		18.332	1.043
																										4.825	1.216		5.013	0.896		7.799	1.341		9.725	1.314		11.894	1.088		13.884	1.303		16.225	0.869		18.338	1.19
																										4.829	0.92		5.014	1.101		7.811	1.592		9.742	2.76		11.91	2.07		13.894	1.396		16.301	1.591		18.372	1.271
																										4.841	1.576		5.029	0.776		7.814	1.178		9.745	1.259		11.913	0.936		13.905	1.121		16.302	1.598		18.401	1.581
																										4.844	1.27		5.03	1.556		7.825	0.865		9.754	1.725		11.921	1.725		13.908	1.026		16.342	2.535		18.428	1.104
																										4.846	1.153		5.037	0.68		7.837	1.548		9.757	1.344		11.951	0.878		13.915	1.388		16.346	1.43		18.431	0.878
																										4.863	1.013		5.047	1.424		7.845	1.117		9.763	1.691		11.952	3.111		13.916	1.041		16.371	1.037		18.446	1.618
																										4.878	1.504		5.08	1.27		7.845	1.321		9.775	1.073		11.962	0.881		13.946	1.233		16.379	1.304		18.472	1.323
																										4.883	1.626		5.082	1.579		7.864	1.268		9.805	1.478		11.97	1.407		13.971	0.946		16.393	1.034		18.494	1.866
																										4.903	1.941		5.107	1.367		7.885	1.361		9.824	1.019		11.976	1.061		13.973	0.998		16.403	0.603		18.525	1.245
																										4.908	0.773		5.115	1.021		7.892	0.87		9.834	1.463		12.049	1.268		13.991	1.681		16.41	1.16		18.537	1.319
																										4.935	2.635		5.117	1.142		7.905	1.43		9.841	1.118		12.054	1.94		13.999	1.062		16.418	1.079		18.55	1.005
																										4.936	1.31		5.139	1.507		7.919	0.966		9.844	1.296		12.077	1.21		14.002	1.121		16.419	2.307		18.563	0.771
																										4.94	0.681		5.149	1.904		7.947	1.305		9.859	1.107		12.083	1.446		14.024	0.915		16.424	1.522		18.605	1.698
																										4.945	1.225		5.153	1.536		7.95	1.359		9.864	1.214		12.094	1.502		14.034	1.916		16.45	1.5		18.606	1.612
																										4.964	1.568		5.153	1.464		7.956	1.602		9.867	1.074		12.103	1.444		14.039	2.569		16.464	1.105		18.61	1.205
																										4.97	1.337		5.178	1.173		7.96	1.409		9.871	1.342		12.111	1.091		14.04	0.92		16.466	1.825		18.613	1.333
																										4.976	1.171		5.181	1.981		7.963	1.158		9.883	1.403		12.121	1.383		14.043	2.383		16.468	1.362		18.617	1.806
																										4.984	1.652		5.195	0.748		7.97	1.397		9.889	1.032		12.145	1.18		14.074	1.2		16.477	1.176		18.633	1.455
																										4.984	1.183		5.197	1.488		7.971	1.474		9.897	1.01		12.15	1.155		14.081	1.924		16.482	1.499		18.663	1.598
																										4.996	1.758		5.2	1.227		7.972	0.592		9.899	1.335		12.185	1.481		14.107	1.561		16.501	1.007		18.669	1.411
																										4.996	2.58		5.2	2.019		7.977	1.169		9.9	1.544		12.195	1.973		14.114	0.863		16.546	1.309		18.679	1.965
																													5.223	1.376		7.977	2.059		9.902	1.832		12.22	1.231		14.116	1.23		16.55	1.3		18.68	0.849
																										4.621	1.196		5.225	0.725		7.979	0.952		9.91	1.373		12.222	1.518		14.116	1.129		16.552	1.338		18.715	0.946
																										4.694	1.713		5.239	1.262		8.014	1.329		9.916	1.154		12.224	1.036		14.121	1.99		16.607	1.554		18.719	2.2
																										4.727	1.205		5.253	1.533		8.015	0.768		9.92	1.248		12.228	1.256		14.141	2.044		16.622	0.977		18.726	1.539
																										4.861	1.37		5.26	1.532		8.015	0.835		9.922	1.037		12.253	1.144		14.169	1.224		16.647	1.84		18.738	1.384
																										4.891	1.706		5.273	1.472		8.016	0.894		9.922	1.168		12.279	1.288		14.171	1.517		16.657	1.397		18.753	1.289
																										4.929	1.254		5.298	0.918		8.021	1.35		9.947	1.257		12.297	1.238		14.176	1.624		16.68	1.378		18.758	1.238
																										4.94	1.353		5.298	1.765		8.024	1.071		9.958	1.49		12.304	1.447		14.177	0.701		16.686	1.499		18.782	1.018
																													5.306	1.312		8.042	1.09		9.969	1.274		12.326	1.272		14.183	0.879		16.691	1.079		18.783	1.127
																										4.144	1.235		5.307	1.463		8.043	1.427		9.986	1.648		12.327	1.842		14.191	1.219		16.697	1.914		18.794	2.189
																										4.218	0.844		5.312	1.262		8.05	1.003		9.986	0.972		12.342	1.231		14.228	2.282		16.704	1.46		18.804	1.043
																										4.529	1.28		5.316	1.176		8.053	0.988		9.996	1.161		12.355	1.17		14.23	0.976		16.71	1.052		18.811	2.464
																													5.319	1.858		8.06	0.877		10.011	0.685		12.38	1.972		14.239	1.62		16.724	1.312		18.817	0.685
																										3.945	1.105		5.326	0.928		8.061	0.549		10.014	0.875		12.405	1.262		14.248	1.219		16.724	3.371		18.818	1.129
																										4.024	1.795		5.33	0.655		8.061	1.129		10.014	0.947		12.41	1.375		14.255	0.857		16.725	1.156		18.859	1.088
																										4.361	1.551		5.347	1.899		8.062	1.064		10.018	1.376		12.41	0.927		14.297	1.218		16.728	0.888		18.895	2.549
																										4.442	1.09		5.348	1.297		8.062	1.279		10.026	1.048		12.46	1.173		14.298	1.577		16.736	1.492		18.94	1.238
																										4.498	1.252		5.349	1.02		8.063	1.002		10.032	1.078		12.477	0.954		14.319	2.123		16.742	1.041		18.94	1.226
																										4.5	2.98		5.355	1.198		8.065	0.927		10.032	1.045		12.487	1.297		14.33	0.946		16.765	1.221		18.945	1.169
																										4.514	1.478		5.363	1.383		8.066	0.942		10.033	1.264		12.488	1.345		14.337	0.994		16.773	1.192		18.951	1.097
																										4.569	1.493		5.366	1.205		8.078	1.388		10.034	1.435		12.517	1.19		14.348	1.167		16.779	0.866		18.967	1.53
																										4.574	1.447		5.366	1.139		8.079	1.123		10.04	1.032		12.56	1.341		14.356	1.286		16.819	1.525		18.985	1.213
																										4.665	1.148		5.372	1.494		8.085	1.297		10.049	2.607		12.566	1.145		14.358	1.011		16.82	1.434
																										4.786	0.935		5.374	1.372		8.094	1.178		10.053	1.043		12.568	1.418		14.358	0.736		16.838	1.047		17.001	1.244
																										4.789	2.476		5.377	1.471		8.095	0.727		10.065	1.654		12.595	1.34		14.362	1.648		16.856	1.398		17.001	1.028
																										4.877	2.575		5.388	1.453		8.101	1.298		10.081	1.541		12.597	1.424		14.382	0.858		16.856	0.925		17.01	0.846
																										4.88	1.396		5.395	0.875		8.114	1.214		10.112	1.614		12.597	0.992		14.398	1.382		16.9	1.022		17.01	1.471
																										4.895	1.244		5.396	1.054		8.125	1.309		10.129	2.419		12.601	1.107		14.403	1.563		16.914	0.686		17.02	1.18
																										4.933	1.21		5.406	1.551		8.132	1.062		10.13	1.146		12.617	0.903		14.403	0.939		16.918	2.111		17.032	1.428
																										4.996	1.257		5.416	1.674		8.14	1.24		10.132	1.193		12.628	1.222		14.409	0.823		16.948	1.361		17.034	1.324
																													5.422	1.253		8.142	1.27		10.138	0.747		12.635	0.99		14.465	1.266		16.959	1.276		17.041	1.666
																													5.425	1.326		8.155	1.798		10.164	1.611		12.635	1.429		14.479	3.586		16.989	0.996		17.041	1.152
																													5.438	1.422		8.165	1.234		10.166	1.23		12.647	0.897		14.486	1.045		16.991	2.093		17.051	1.429
																													5.45	1.29		8.167	1.312		10.183	1.525		12.651	1.505		14.493	1.232		16.995	2.273		17.054	1.516
																													5.452	1.789		8.169	0.806		10.186	1.534		12.659	1.216		14.496	1.295					17.065	1.224
																													5.455	1.141		8.174	1.241		10.204	1.538		12.66	1.214		14.502	1.776		15.008	0.954		17.067	0.781
																													5.46	1.112		8.187	0.897		10.204	1.367		12.7	1.456		14.518	1.122		15.032	2.375		17.067	0.954
																													5.461	1.132		8.221	1.304		10.206	1.705		12.706	0.708		14.521	0.75		15.033	1.451		17.075	1.669
																													5.471	1.595		8.245	1.591		10.22	1.313		12.716	1.208		14.525	1.487		15.041	2.778		17.091	1.499
																													5.473	1.275		8.25	0.798		10.232	1.197		12.725	0.926		14.541	1.827		15.045	1.019		17.091	1.444
																													5.493	1.417		8.262	0.938		10.232	1.566		12.751	1.31		14.547	1.074		15.053	1.217		17.094	1.034
																													5.494	1.039		8.278	0.614		10.242	1.45		12.775	0.567		14.557	1.433		15.055	1.087		17.129	1.43
																													5.494	1.362		8.295	1.026		10.243	1.232		12.786	2.119		14.565	1.834		15.064	1.489		17.136	1.279
																													5.501	1.099		8.301	1.149		10.246	1.448		12.787	1.89		14.568	1.153		15.064	1.098		17.145	1.638
																													5.504	2.72		8.304	1.488		10.247	0.891		12.796	0.923		14.571	1.536		15.068	1.811		17.148	1.064
																													5.511	0.872		8.311	1.508		10.257	1.628		12.827	1.946		14.597	1.43		15.069	1.298		17.148	1.134
																													5.514	1.489		8.314	3.026		10.259	1.057		12.834	1.42		14.601	1.112		15.075	1.103		17.172	1.217
																													5.515	0.868		8.332	1.139		10.266	0.9		12.84	0.66		14.63	1.188		15.077	1.854		17.177	1.416
																													5.536	1.564		8.334	0.952		10.286	1.27		12.841	1.782		14.636	0.976		15.077	1.206		17.179	1.044
																													5.549	2.029		8.336	1.24		10.294	1.062		12.859	1.128		14.653	1.016		15.08	1.134		17.183	1.314
																													5.579	1.162		8.34	1.15		10.305	0.885		12.863	0.893		14.666	0.903		15.089	1.616		17.186	1.149
																													5.604	0.792		8.348	1.088		10.307	1.415		12.866	1.578		14.682	1.452		15.1	0.751		17.188	1.234
																													5.609	1.976		8.349	2.385		10.309	1.022		12.883	1.248		14.684	0.887		15.104	1.537		17.193	0.983
																													5.615	1.662		8.354	1.365		10.311	0.814		12.89	1.235		14.712	0.924		15.129	1.581		17.194	1.148
																													5.622	1.35		8.37	1.109		10.317	1.123		12.902	1.029		14.718	1.976		15.129	0.746		17.195	0.541
																													5.623	1.065		8.371	1.151		10.327	2.043		12.914	1.105		14.721	1.142		15.139	0.983		17.196	0.976
																													5.626	0.925		8.375	0.804		10.361	1.024		12.923	3.57		14.735	1.429		15.144	1.296		17.2	1.352
																													5.627	1.056		8.382	1.392		10.385	1.298		12.936	1.304		14.742	1.052		15.145	1.355		17.206	1.147
																													5.634	1.15		8.383	1.071		10.393	2.488		12.954	0.902		14.758	0.92		15.161	1.191		17.22	3.014
																													5.641	0.831		8.392	1.092		10.404	1.338		12.954	1.269		14.765	1.11		15.168	1.2		17.225	1.183
																													5.644	0.94		8.399	0.759		10.416	1.036		12.965	1.097		14.768	0.815		15.169	0.926		17.229	1.03
																													5.654	1.137		8.399	0.904		10.431	1.233		12.97	1.262		14.77	1.139		15.177	1.2		17.247	0.873
																													5.656	0.896		8.402	1.532		10.435	1.021		12.995	1.103		14.787	1.289		15.177	1.232		17.248	1.216
																													5.656	1.367		8.414	1.366		10.435	1.271					14.806	2.339		15.179	1.266		17.251	1.425
																													5.658	3.384		8.418	0.975		10.452	0.808		11.002	1.176		14.81	0.864		15.187	0.884		17.254	1.491
																													5.661	1.087		8.433	1.175		10.452	1.301		11.004	1.099		14.832	0.634		15.191	1.091		17.27	1.26
																													5.666	0.925		8.442	0.912		10.461	1.189		11.004	1.375		14.888	1.638		15.191	1.154		17.287	1.225
																													5.691	2.082		8.448	1.353		10.463	1.173		11.004	1.423		14.921	1.53		15.193	1.728		17.289	1.752
																													5.693	1.701		8.454	0.798		10.47	0.631		11.006	1.64		14.923	1.743		15.194	1.5		17.292	1.501
																													5.7	1.284		8.462	0.88		10.474	1.236		11.007	1.06		14.927	0.799		15.199	1.349		17.301	1.155
																													5.716	1.849		8.465	1.185		10.476	1.495		11.01	1.178		14.941	1.173		15.201	1.696		17.31	1.446
																													5.726	1.223		8.488	1.737		10.479	1.056		11.016	1.301		14.95	1.408		15.202	1.227		17.318	1.742
																													5.741	1.655		8.496	1.346		10.493	1.309		11.019	1.117		14.95	1.134		15.202	1.789		17.323	1.484
																													5.744	1.303		8.497	1.051		10.497	1.184		11.025	1.414		14.95	1.047		15.223	0.842		17.323	1.343
																													5.753	1.35		8.506	1.241		10.524	1.188		11.03	1.477		14.95	1.174		15.238	1.349		17.331	1.109
																													5.756	1.502		8.521	1.514		10.551	1.219		11.032	1.29		14.952	1.42		15.24	0.895		17.333	1.293
																													5.76	1.921		8.522	0.963		10.561	0.83		11.033	1.18		14.99	1.34		15.242	1.763		17.342	0.666
																													5.779	1.638		8.532	0.687		10.564	1.129		11.036	1.395					15.248	1.207		17.344	1.177
																													5.78	0.981		8.537	1.204		10.568	1.269		11.045	1.22		13	1.327		15.253	1.317		17.344	1.603
																													5.787	1.554		8.541	1.223		10.572	0.846		11.048	1.38		13.002	1.384		15.267	3.15		17.346	1.789
																													5.801	1.87		8.547	1.24		10.574	0.824		11.051	1.31		13.006	1.317		15.276	1.192		17.351	1.168
																													5.802	1.634		8.563	1.031		10.595	0.931		11.054	1.116		13.012	1.546		15.291	1.021		17.368	1.134
																													5.812	1.548		8.564	1.596		10.599	1.246		11.055	1.018		13.015	1.296		15.293	1.227		17.369	1.067
																													5.814	0.978		8.566	1.493		10.609	0.723		11.055	1.539		13.017	1.313		15.3	2.021		17.375	1.23
																													5.816	1.227		8.566	0.846		10.609	1.076		11.057	0.978		13.023	0.963		15.303	2.263		17.381	1.197
																													5.819	1.365		8.573	1.684		10.612	0.716		11.058	0.91		13.024	1.392		15.303	0.881		17.386	0.709
																													5.826	1.308		8.576	0.83		10.614	1.351		11.069	0.959		13.026	1.632		15.324	1.229		17.397	1.329
																													5.829	1.337		8.579	1.4		10.614	1.08		11.069	1.171		13.032	1.007		15.341	1.73		17.402	1.168
																													5.836	1.541		8.581	1.83		10.636	0.932		11.07	1.437		13.034	0.869		15.346	0.862		17.408	1.134
																													5.839	1.442		8.582	1.441		10.646	1.227		11.071	1.283		13.041	1.646		15.357	1.368		17.415	1.751
																													5.841	1.615		8.583	1.17		10.646	1.368		11.072	1.161		13.044	1.36		15.357	1.526		17.422	0.83
																													5.845	1.466		8.598	0.923		10.658	0.943		11.076	0.729		13.055	1.029		15.358	1.24		17.422	1.513
																													5.846	1.826		8.598	1.469		10.67	1.208		11.077	1.325		13.056	1.451		15.364	1.251		17.43	1.292
																													5.846	0.81		8.603	1.008		10.679	0.851		11.082	2.155		13.06	1.293		15.364	0.992		17.435	1.191
																													5.85	1.058		8.61	2.27		10.685	1.03		11.085	1.672		13.062	1.162		15.368	0.956		17.437	1.383
																													5.859	1.508		8.631	0.996		10.685	1.555		11.086	0.81		13.075	1.345		15.377	1.624		17.443	1.089
																													5.86	0.772		8.649	1.335		10.687	1.225		11.089	1.452		13.076	1.072		15.379	0.789		17.447	1.144
																													5.861	0.903		8.657	1.165		10.691	0.789		11.093	1.338		13.085	1.261		15.384	0.962		17.448	1.062
																													5.862	1.446		8.66	1.166		10.694	0.686		11.097	1.106		13.091	1.402		15.385	1.491		17.452	2.409
																													5.864	0.96		8.666	1.17		10.696	1.541		11.101	2.977		13.097	1.174		15.392	2.847		17.457	1.07
																													5.89	1.291		8.668	3.177		10.706	1.064		11.107	1.438		13.098	3.136		15.412	1.494		17.47	1.14
																													5.918	1.168		8.673	1.087		10.707	1.042		11.109	1.063		13.1	1.294		15.416	1.208		17.47	0.78
																													5.924	1.636		8.674	1.563		10.707	1.23		11.109	1.148		13.103	1.138		15.42	0.889		17.47	1.195
																													5.929	1.272		8.681	1.598		10.722	0.865		11.112	1.398		13.117	1.217		15.436	1.416		17.475	0.995
																													5.932	0.858		8.686	1.281		10.739	1.248		11.117	1.25		13.129	1.227		15.441	1.31		17.475	1.57
																													5.933	1.331		8.714	0.903		10.749	1.314		11.12	1.038		13.133	1.46		15.441	1.433		17.482	1.682
																													5.936	2.033		8.716	1.812		10.752	1.088		11.121	3.026		13.142	1.104		15.446	1.311		17.489	1.342
																													5.941	1.431		8.727	1.331		10.756	1.773		11.124	1.102		13.144	1.381		15.448	1.066		17.495	1.211
																													5.945	1.073		8.731	1.54		10.773	1.013		11.129	1.074		13.146	1.06		15.449	1.147		17.496	1.045
																													5.949	1.1		8.731	1.187		10.773	1.603		11.13	1.32		13.157	1.081		15.452	1.398		17.497	0.844
																													5.956	0.951		8.734	1.335		10.773	1.155		11.134	1.679		13.157	1.224		15.456	1.203		17.503	1.013
																													5.958	1.103		8.734	1.296		10.801	0.941		11.135	1.485		13.158	1.222		15.457	0.934		17.518	1.22
																													5.959	1.285		8.738	1.483		10.808	1.567		11.142	1.912		13.16	1.899		15.46	1.146		17.523	1.338
																													5.964	0.948		8.745	1.181		10.82	1.436		11.143	1.712		13.163	0.847		15.462	1.414		17.524	1.481
																													5.966	1.269		8.755	1.106		10.828	1.101		11.153	1.177		13.165	1.272		15.462	1.091		17.527	0.888
																													5.987	1.63		8.772	1.278		10.84	1.415		11.156	1.336		13.166	1.296		15.465	1.71		17.54	1.186
																													5.988	1.287		8.779	1.545		10.84	1.124		11.158	1.561		13.178	1.079		15.472	1.459		17.56	1.294
																													5.989	1.369		8.781	0.745		10.85	0.971		11.161	1.24		13.18	1.176		15.475	1.303		17.575	1.045
																													5.989	1.238		8.786	1.331		10.851	1.247		11.162	1.087		13.183	1.275		15.475	1.315		17.582	1.189
																													5.993	1.089		8.793	1.256		10.862	1.391		11.163	1.381		13.183	1.962		15.478	1.34		17.601	1.73
																													5.999	1.301		8.795	1.004		10.868	0.843		11.168	1.572		13.188	0.907		15.48	1.075		17.612	1.326
																													6.005	1.138		8.795	0.833		10.881	1.022		11.168	2.198		13.195	1.861		15.491	1.213		17.625	1.423
																													6.006	1.264		8.8	1.5		10.883	1.463		11.171	1.15		13.204	1.69		15.493	1.494		17.647	0.993
																													6.01	1.279		8.81	1.256		10.887	1.001		11.171	1.144		13.205	1.283		15.495	1.643		17.653	1.111
																													6.014	2.027		8.81	1.238		10.894	0.917		11.177	1.017		13.206	1.07		15.495	1.504		17.654	1.775
																													6.015	1.383		8.825	1.106		10.906	0.698		11.18	1.36		13.208	1.071		15.501	0.773		17.655	1.066
																													6.031	2.562		8.83	1.198		10.907	1.112		11.183	1.232		13.215	1.235		15.501	1.1		17.657	1.284
																													6.036	1.109		8.836	1.112		10.921	0.742		11.184	1.047		13.217	1.283		15.502	1.433		17.658	1.406
																													6.047	1.402		8.838	1.31		10.94	1.71		11.187	1.673		13.217	1.569		15.514	1.33		17.696	1.321
																													6.052	0.879		8.841	1.193		10.956	1.234		11.196	1.946		13.219	0.832		15.523	1.135		17.698	1.335
																													6.061	1.561		8.842	1.346		10.975	3.015		11.198	1.64		13.223	1.421		15.527	2.448		17.703	1.46
																													6.064	2.026		8.843	0.923		10.976	1.153		11.198	1.149		13.223	1.623		15.531	0.83		17.703	2.886
																													6.078	1.562		8.861	1.342		10.986	1.126		11.201	1.57		13.226	1.323		15.544	1.605		17.706	1.139
																													6.079	1.398		8.862	1.427		10.99	1.102		11.201	2.626		13.226	1.357		15.547	1.133		17.708	1.459
																													6.083	0.765		8.863	1.441					11.202	0.919		13.231	1.262		15.548	1.427		17.731	0.845
																													6.087	1.332		8.87	1.861		9.006	1.546		11.205	1.355		13.232	1.327		15.553	0.973		17.758	1.294
																													6.092	1.057		8.893	1.564		9.009	1.114		11.206	1.606		13.241	1.675		15.557	0.996		17.76	1.085
																													6.092	1.182		8.897	0.895		9.013	0.919		11.206	1.209		13.243	1.706		15.571	1.776		17.764	1.047
																													6.092	0.967		8.903	1.337		9.029	1.786		11.208	0.987		13.245	1.162		15.571	1.369		17.804	2.705
																													6.096	1.771		8.923	1.363		9.034	1.357		11.214	0.915		13.246	1.811		15.571	1.05		17.808	0.818
																													6.103	1.131		8.93	1.076		9.035	1.002		11.214	0.968		13.25	1.599		15.574	1.411		17.808	1.286
																													6.107	0.908		8.943	1.064		9.035	1.184		11.218	0.963		13.251	1.078		15.591	1.305		17.829	1.79
																													6.117	0.717		8.969	1.24		9.044	0.748		11.221	1.062		13.252	1.067		15.595	1.046		17.832	1.1
																													6.121	1.236		8.971	1.249		9.045	1.446		11.222	1.134		13.253	0.956		15.6	1.261		17.833	0.774
																													6.158	1.228		8.978	1.123		9.049	1.383		11.226	1.444		13.254	1.069		15.608	1.779		17.836	0.934
																													6.166	0.981					9.064	1.121		11.238	1.106		13.256	0.969		15.613	1.173		17.842	1.187
																													6.168	0.728		7.002	1.219		9.065	1.763		11.24	1.279		13.257	1.406		15.624	1.529		17.844	1.273
																													6.17	0.872		7.019	0.719		9.071	0.759		11.246	1.136		13.265	1.2		15.638	0.943		17.849	1.145
																													6.174	1.448		7.021	1.166		9.074	1.488		11.248	1.276		13.278	1.423		15.64	0.765		17.878	1.245
																													6.188	1.191		7.022	1.235		9.076	1.214		11.25	1.613		13.29	1.928		15.645	1.611		17.884	0.802
																													6.19	1.165		7.025	1.203		9.077	1.34		11.259	1.482		13.294	1.579		15.647	1.11		17.891	1.36
																													6.191	1.398		7.026	1.098		9.079	1.28		11.266	0.818		13.307	0.815		15.648	1.042		17.893	1.91
																													6.193	1.628		7.033	1.467		9.08	0.852		11.274	1.447		13.308	1.84		15.654	0.931		17.894	1.527
																													6.206	2.298		7.05	1.428		9.085	1.053		11.28	0.833		13.308	0.75		15.657	0.834		17.899	1.959
																													6.207	0.592		7.054	1.511		9.086	1.469		11.281	1.342		13.31	1.608		15.658	0.956		17.904	1.438
																													6.212	1.069		7.059	0.897		9.088	1.14		11.289	1.417		13.312	1.711		15.662	0.548		17.908	1.22
																													6.217	1.366		7.063	1.076		9.09	1.088		11.29	1.354		13.32	1.52		15.664	0.879		17.915	1.821
																													6.23	1.699		7.065	2.017		9.093	1.664		11.292	1.267		13.32	1.396		15.67	1.456		17.951	1.369
																													6.238	1.46		7.069	1.113		9.102	2.135		11.295	1.555		13.33	1.282		15.679	1.061		17.964	1.101
																													6.242	1.3		7.074	1.301		9.104	1.245		11.302	2.376		13.349	1.326		15.679	0.897		17.965	1.52
																													6.243	1.042		7.076	1.536		9.105	1.273		11.302	2.084		13.35	1.702		15.679	1.023		17.981	1.453
																													6.245	1.676		7.083	1.106		9.105	1.354		11.306	1.445		13.352	1.772		15.68	1.456		17.985	1.262
																													6.245	2.046		7.091	1.038		9.112	1.285		11.311	1.132		13.354	0.87		15.682	1.071		17.988	0.726
																													6.246	1.925		7.095	1.565		9.114	1.486		11.314	1.503		13.358	1.4		15.684	0.986		17.99	0.799
																													6.246	1.295		7.097	1.132		9.12	1.137		11.315	1.444		13.359	0.85		15.693	0.86		17.994	1.271
																													6.246	0.955		7.103	1.322		9.123	1.4		11.316	0.907		13.362	0.811		15.695	1.085		17.998	1.148
																													6.249	1.616		7.104	0.907		9.126	1.166		11.318	2.038		13.372	1.251		15.695	1.24		17.999	2.35
																													6.269	0.858		7.11	2.429		9.128	1.452		11.326	1.254		13.376	1.081		15.697	1.215		18.006	0.905
																													6.27	1.384		7.114	0.878		9.128	0.854		11.327	1.435		13.379	1.753		15.712	1.391		18.013	1.683
																													6.272	1.087		7.122	1.427		9.158	1.823		11.335	0.856		13.385	1.16		15.713	1.583		18.021	1.089
																													6.281	1.156		7.123	1.457		9.16	1.048		11.339	1.141		13.386	1.192		15.72	1.505		18.023	1.343
																													6.288	2.294		7.126	1.306		9.161	1.134		11.342	1.837		13.387	0.787		15.722	0.879		18.038	1.237
																													6.292	1.244		7.127	1.548		9.168	1.564		11.345	1.251		13.387	1.491		15.73	1.097		18.038	1.314
																													6.294	0.585		7.14	1.302		9.168	1.515		11.349	1.344		13.396	0.922		15.732	1.029		18.045	1.35
																													6.297	2.063		7.151	1.255		9.173	1.259		11.351	0.702		13.399	1.81		15.733	3.093		18.047	1.058
																													6.299	2.629		7.156	0.993		9.178	0.971		11.362	1.223		13.399	0.813		15.741	1.181		18.049	1.309
																													6.299	1.136		7.157	1.349		9.178	1.683		11.363	1.149		13.401	0.77		15.752	0.816		18.057	1.39
																													6.303	2.35		7.159	1.34		9.178	1.507		11.363	1.383		13.405	0.945		15.753	1.353		18.059	0.768
																													6.328	1.266		7.16	1.325		9.181	0.923		11.365	1.492		13.408	1.096		15.754	1.139		18.061	1.066
																													6.331	1.314		7.16	1.576		9.182	4.102		11.389	1.466		13.409	2.409		15.76	1.157		18.068	0.836
																													6.337	1		7.182	1.541		9.182	1.544		11.394	1.77		13.412	1.027		15.766	1.945		18.069	0.89
																													6.344	3.277		7.199	1.393		9.19	1.576		11.394	1.164		13.414	1.366		15.77	1.775		18.092	2.275
																													6.348	1.74		7.2	0.991		9.193	1.609		11.413	1.36		13.429	1.587		15.771	0.959		18.095	1.04
																													6.349	1.158		7.211	1.511		9.196	0.678		11.413	0.858		13.431	1.223		15.774	1.047		18.113	0.827
																													6.351	0.992		7.219	1.901		9.198	1.278		11.415	1.104		13.437	1.303		15.778	1.366		18.122	1.453
																													6.355	1.295		7.222	1.317		9.204	1.214		11.417	0.863		13.441	1.281		15.789	1.111		18.123	2.034
																													6.363	1.395		7.223	1.522		9.21	1.871		11.423	0.881		13.445	1.418		15.79	1.363		18.123	1.589
																													6.37	1.624		7.224	2.01		9.212	2.164		11.425	1.225		13.445	1.462		15.792	0.829		18.124	1.635
																													6.37	1.326		7.225	1.382		9.215	2.075		11.431	0.903		13.45	1.365		15.792	1.039		18.127	1.395
																													6.379	2.158		7.23	1.289		9.219	1.089		11.434	1.367		13.454	1.128		15.8	1.172		18.129	1.215
																													6.383	1.313		7.238	1.324		9.22	0.834		11.436	1.008		13.455	1.053		15.815	1.043		18.153	1.015
																													6.388	1.837		7.248	1.744		9.228	1.358		11.442	1.196		13.46	1.209		15.821	1.237		18.157	0.558
																													6.39	1.16		7.251	1.198		9.236	1.322		11.442	1.12		13.464	1.535		15.83	1.58		18.159	1.34
																													6.391	0.992		7.252	1.127		9.238	1.498		11.444	1.745		13.465	0.934		15.834	1.871		18.162	1.095
																													6.395	1.628		7.254	1.075		9.244	0.782		11.444	1.418		13.469	1.71		15.843	1.149		18.164	1.241
																													6.401	1.064		7.257	1.297		9.246	1.14		11.447	1.407		13.47	1.254		15.85	2.393		18.171	1.193
																													6.414	2.695		7.258	1.323		9.251	1.059		11.447	1.522		13.473	0.958		15.852	1.147		18.214	1.098
																													6.417	2.941		7.261	1.327		9.265	1.599		11.452	0.839		13.474	1.586		15.854	1.111		18.216	1.814
																													6.422	1.028		7.261	0.819		9.267	1.483		11.458	1.092		13.476	0.881		15.856	1.946		18.223	0.676
																													6.43	0.88		7.264	1.374		9.268	1.521		11.461	1.087		13.476	1.476		15.858	1.985		18.225	0.924
																													6.431	0.91		7.264	1.249		9.272	1.169		11.465	1.365		13.485	1.174		15.866	1.065		18.226	1.147
																													6.432	1.341		7.265	1.535		9.274	1.652		11.465	1.01		13.487	0.846		15.867	1.107		18.229	1.183
																													6.438	0.796		7.268	1.505		9.274	0.663		11.468	1.271		13.493	0.935		15.871	1.343		18.253	1.159
																													6.439	1.179		7.282	1.269		9.275	1.27		11.469	1.267		13.502	0.945		15.872	0.954		18.255	1.359
																													6.444	1.134		7.282	1.362		9.276	1.023		11.469	1.311		13.503	1.469		15.876	1.144		18.255	1.612
																													6.464	1.33		7.287	1.168		9.284	0.895		11.471	1.707		13.508	1.357		15.886	2.354		18.257	1.109
																													6.468	0.631		7.29	1.505		9.287	1.178		11.472	1.384		13.512	0.995		15.888	2.344		18.265	1.454
																													6.479	1.239		7.294	1.064		9.287	1.456		11.48	1.619		13.523	2.052		15.889	1.454		18.266	1.117
																													6.48	1.25		7.295	1.318		9.289	0.688		11.488	1.171		13.535	1.481		15.891	1.503		18.268	1.121
																													6.481	1.201		7.296	1.139		9.289	1.031		11.5	3.095		13.536	1.431		15.893	1.399		18.272	1.897
																													6.482	1.269		7.296	2.03		9.3	1.696		11.51	0.764		13.544	1.225		15.902	2.413		18.29	2.12
																													6.491	1.146		7.304	0.966		9.309	1.232		11.511	1.015		13.551	1.384		15.904	2.489		18.3	0.93
																													6.492	1		7.305	1.412		9.31	1.703		11.526	0.904		13.552	1.83		15.904	1.556		18.31	1.046
																													6.493	1.772		7.317	1.294		9.311	1.343		11.526	0.93		13.555	1.199		15.912	1.453		18.315	1.578
																													6.508	1.075		7.325	1.232		9.315	1.418		11.529	1.498		13.561	1.117		15.923	1.643		18.321	1.453
																													6.508	1.167		7.325	1.383		9.317	0.937		11.531	0.826		13.562	1.404		15.926	1.435		18.339	1.367
																													6.51	0.996		7.326	1.761		9.326	1.097		11.538	1.407		13.565	1.102		15.932	1.36		18.339	0.87
																													6.521	1.35		7.329	1.187		9.328	1.05		11.54	0.958		13.568	1.1		15.942	1.329		18.348	1.35
																													6.525	1.576		7.331	0.654		9.329	1.326		11.54	0.774		13.569	3.163		15.942	1.346		18.351	1.23
																													6.53	2.968		7.333	1.038		9.332	1.191		11.551	0.937		13.569	1.03		15.944	0.524		18.354	1.717
																													6.533	0.882		7.339	1.918		9.332	2.39		11.554	0.729		13.576	1.465		15.954	1.031		18.36	1.001
																													6.536	1.993		7.347	1.244		9.334	1.283		11.558	1.01		13.583	1.013		15.971	1.559		18.373	1.385
																													6.538	0.683		7.347	1.632		9.339	1.909		11.56	1.159		13.591	1.292		15.987	1.292		18.373	1.4
																													6.546	2.011		7.35	1.811		9.341	1.25		11.562	1.222		13.598	0.782		15.99	1.724		18.377	1.463
																													6.551	1.483		7.353	2.662		9.344	0.969		11.562	1.311		13.599	1.151		15.991	0.936		18.379	1.229
																													6.555	1.318		7.36	1.085		9.345	1.424		11.562	1.229		13.603	0.769		15.998	1.205		18.385	1.684
																													6.569	1.052		7.363	1.338		9.346	1.18		11.567	1.67		13.604	1.431		16.003	1.068		18.403	0.931
																													6.575	1.11		7.368	1.683		9.352	0.739		11.581	1.4		13.604	1.92		16.006	1.35		18.406	1.187
																													6.582	1.21		7.373	1.269		9.358	0.764		11.59	1.559		13.606	1.531		16.007	0.779		18.409	1.322
																													6.591	0.743		7.378	0.889		9.359	2.279		11.59	1.33		13.609	1.282		16.009	1.005		18.428	0.646
																													6.598	1.166		7.378	1.212		9.365	0.89		11.594	1.24		13.611	1.235		16.009	1.148		18.443	0.923
																													6.598	1.139		7.381	1.151		9.371	1.387		11.601	0.837		13.618	1.525		16.009	1.061		18.451	1.338
																													6.612	1.346		7.389	1.744		9.372	1.551		11.604	1.136		13.62	0.809		16.014	0.854		18.455	0.666
																													6.613	0.783		7.389	1.445		9.373	0.995		11.604	1.094		13.637	1.291		16.017	1.831		18.461	0.672
																													6.613	0.892		7.393	0.75		9.374	1.877		11.607	1.504		13.638	1.112		16.022	1.072		18.466	1.676
																													6.619	1.259		7.393	0.914		9.375	0.623		11.61	0.899		13.638	1.043		16.022	1.508		18.478	1.492
																													6.623	1.033		7.394	1.41		9.376	1.403		11.613	1.564		13.64	1.82		16.034	1.128		18.485	0.699
																													6.624	1.327		7.4	1.478		9.389	1.238		11.616	0.874		13.648	1.408		16.037	2.947		18.485	0.786
																													6.631	0.923		7.401	1.399		9.396	0.921		11.617	1.373		13.65	1.376		16.039	1.397		18.492	1.409
																													6.632	1.349		7.405	1.039		9.399	1.292		11.62	0.649		13.65	1.07		16.039	0.98		18.501	2.971
																													6.652	1.264		7.408	1.532		9.402	1.42		11.624	1.032		13.651	1.426		16.04	1.085		18.518	0.942
																													6.661	2.067		7.412	1.187		9.414	1.381		11.627	1.823		13.651	1.245		16.046	1.163		18.521	1.051
																													6.673	0.562		7.414	1.131		9.414	1.098		11.628	0.886		13.654	0.983		16.056	1.275		18.53	1.44
																													6.675	1.175		7.422	1.346		9.419	1.612		11.633	1.604		13.656	1.244		16.057	1.37		18.531	1.179
																													6.678	1.559		7.423	1.305		9.419	1.037		11.637	1.177		13.657	0.897		16.064	1.092		18.532	0.987
																													6.686	1.07		7.426	2.223		9.42	1.538		11.641	1.013		13.659	1.046		16.069	2.017		18.548	0.914
																													6.686	1.327		7.434	1.493		9.426	1.179		11.644	1.153		13.66	1.854		16.094	1.446		18.554	1.427
																													6.688	1.024		7.439	0.915		9.428	1.211		11.646	1.169		13.663	2.126		16.097	1.063		18.556	1.11
																													6.689	1.211		7.439	1.202		9.439	1.508		11.647	1.901		13.667	1.749		16.107	0.757		18.571	1.042
																													6.691	1.371		7.44	1.771		9.44	0.719		11.65	1.494		13.674	1.34		16.107	1.131		18.575	1.294
																													6.692	1.476		7.442	1.173		9.444	1.096		11.654	1.059		13.678	1.152		16.108	1.124		18.58	1.245
																													6.692	1.411		7.443	1.037		9.445	1.196		11.655	1.137		13.679	0.98		16.111	0.907		18.59	1.197
																													6.695	1.057		7.447	0.805		9.445	1.212		11.658	1.276		13.682	1.191		16.116	1.212		18.602	1.044
																													6.701	0.966		7.449	1.335		9.45	1.214		11.658	1.585		13.687	0.801		16.118	0.724		18.616	1.108
																													6.703	1.135		7.459	1.328		9.45	2.058		11.659	1.952		13.698	1.767		16.12	1.287		18.65	1.427
																													6.716	0.993		7.46	1.192		9.451	1.273		11.663	1.137		13.703	2.327		16.124	1.425		18.669	1.539
																													6.719	2.552		7.461	1.333		9.453	1.397		11.663	1.503		13.703	1.052		16.125	1.337		18.677	1.572
																													6.721	1.079		7.468	0.795		9.454	1.593		11.67	1.646		13.714	1.627		16.158	0.854		18.681	1.419
																													6.723	1.528		7.472	0.975		9.461	1.39		11.67	1.265		13.717	0.766		16.162	0.996		18.724	0.977
																													6.729	1.314		7.476	1.409		9.481	1.295		11.674	1.014		13.718	1.076		16.166	1.7		18.749	1.27
																													6.733	1.38		7.48	1.431		9.482	1.255		11.679	2.592		13.735	0.998		16.17	1.297		18.761	0.974
																													6.733	1.44		7.484	1.15		9.488	1.374		11.679	1.082		13.74	1.992		16.173	1.856		18.776	1.272
																													6.739	1.071		7.504	1.317		9.493	2.369		11.683	1.3		13.745	1.24		16.175	1.214		18.778	1.497
																													6.74	1.683		7.508	1.204		9.503	1.303		11.685	1.313		13.752	0.591		16.182	1.218		18.779	0.941
																													6.745	1.842		7.508	1.426		9.505	1.211		11.687	0.995		13.752	1.095		16.19	2.031		18.793	1.23
																													6.75	1.187		7.511	1.398		9.515	0.868		11.687	1.418		13.759	1.594		16.193	1.033		18.793	1.047
																													6.752	1.268		7.519	1.174		9.521	1.12		11.699	0.706		13.759	1.173		16.194	1.359		18.82	1.706
																													6.756	0.777		7.524	1.371		9.524	1.268		11.702	1.82		13.76	1.263		16.196	1.385		18.829	2.192
																													6.773	1.391		7.524	1.425		9.527	1.286		11.703	1.144		13.77	1.341		16.224	0.972		18.832	0.859
																													6.778	1.231		7.532	1.359		9.532	1.083		11.708	1.725		13.771	2.706		16.226	1.518		18.832	1.238
																													6.778	1.496		7.535	0.775		9.537	1.16		11.711	0.879		13.775	1.18		16.228	0.931		18.833	1.689
																													6.785	1.238		7.536	1.198		9.545	1.903		11.719	1.698		13.775	0.727		16.234	1.75		18.835	1.04
																													6.786	1.244		7.541	1.039		9.547	0.833		11.721	1.597		13.78	1.182		16.236	0.841		18.858	1.104
																													6.789	2.212		7.555	0.967		9.555	1.212		11.721	1.314		13.785	1.389		16.236	1.586		18.859	1.048
																													6.797	1.363		7.556	3.088		9.555	1.591		11.723	0.692		13.796	0.824		16.24	1.153		18.875	1.194
																													6.803	1.459		7.561	0.573		9.555	1.562		11.727	1.772		13.799	0.851		16.241	0.647		18.884	1.426
																													6.808	1.309		7.565	1.203		9.556	1.112		11.728	1.508		13.799	1.341		16.243	1.331		18.908	0.792
																													6.809	1.164		7.566	1.641		9.557	0.824		11.739	0.626		13.805	0.735		16.252	1.581		18.91	1.218
																													6.809	1.83		7.567	0.934		9.558	2.754		11.739	1.444		13.806	0.767		16.254	1.193		18.911	1.303
																													6.821	1.387		7.567	1.299		9.57	1.213		11.741	1.272		13.811	1.625		16.257	1.622		18.921	1.119
																													6.822	1.347		7.573	1.645		9.596	0.778		11.742	1.279		13.811	1.3		16.259	1.398		18.921	1.195
																													6.824	1.173		7.577	0.988		9.597	0.995		11.742	1.448		13.813	1.13		16.263	1.317		18.921	1.506
																													6.824	1.148		7.581	1.329		9.597	1.489		11.744	1.497		13.817	1.113		16.275	1.338		18.965	1.076
																													6.831	1.309		7.585	1.415		9.602	1.24		11.75	1.349		13.817	0.632		16.285	1.661		18.965	1.4
																													6.834	1.323		7.586	1.447		9.606	0.815		11.753	1.128		13.819	0.81		16.286	1.517		18.968	1.138
																													6.837	3.197		7.604	1.311		9.609	1.377		11.759	1.047		13.821	1.968		16.286	1.225		18.973	1.412
																													6.84	0.883		7.61	0.961		9.61	0.914		11.759	1.662		13.821	1.565		16.296	1.8		18.985	1.469
																													6.841	1.355		7.618	1.248		9.611	1.454		11.76	1.242		13.822	1.189		16.3	0.981		18.991	1.524
																													6.852	1.432		7.627	1.034		9.613	1.478		11.76	0.818		13.832	1.077		16.303	0.686
																													6.854	1.305		7.633	1.372		9.618	1.382		11.765	1.602		13.832	0.926		16.304	0.776		17.027	1.223
																													6.854	0.883		7.634	1.617		9.619	1.125		11.766	1.811		13.836	1.314		16.312	1.217		17.028	0.822
																													6.858	1.118		7.642	1.054		9.626	0.862		11.769	0.978		13.841	1.684		16.322	1.005		17.034	0.979
																													6.86	1.365		7.645	1.033		9.628	1.606		11.774	1.238		13.843	1.036		16.329	1.367		17.048	1.336
																													6.866	1.705		7.652	1.008		9.628	1.373		11.776	1.296		13.846	1.249		16.33	1.452		17.059	1.707
																													6.867	1.135		7.654	1.464		9.629	1.025		11.778	1.543		13.857	1.285		16.343	0.941		17.064	2.923
																													6.867	0.941		7.655	0.954		9.631	0.99		11.78	1.401		13.864	0.708		16.345	1.504		17.085	1.506
																													6.869	1.568		7.655	2.058		9.631	1.36		11.789	1.007		13.865	1.134		16.347	1.221		17.101	1.05
																													6.875	1.392		7.669	1.696		9.641	1.477		11.79	1.66		13.865	1.369		16.348	1.135		17.103	0.85
																													6.877	1.499		7.673	1.504		9.648	0.941		11.79	1.328		13.867	1.455		16.35	1.117		17.116	1.094
																													6.885	1.853		7.675	1.723		9.652	1.282		11.793	1.424		13.868	1.154		16.355	0.907		17.117	1.116
																													6.885	1.113		7.675	1.427		9.661	1.2		11.799	1.048		13.876	1.281		16.356	1.499		17.122	1.486
																													6.889	1.221		7.681	1.69		9.664	0.98		11.801	1.306		13.88	2.14		16.356	1.958		17.148	1.058
																													6.9	1.021		7.686	1.019		9.668	1.168		11.822	1.17		13.885	1.004		16.365	2.029		17.156	1.43
																													6.901	1.097		7.687	2.159		9.671	1.975		11.832	1.962		13.891	1.37		16.366	1.158		17.157	1.393
																													6.903	1.238		7.694	1.217		9.672	1.502		11.836	0.986		13.894	1.222		16.37	1.364		17.159	1.213
																													6.904	2.105		7.695	1.042		9.678	1.239		11.837	1.257		13.902	1.148		16.38	1.43		17.165	0.656
																													6.93	1.809		7.695	1.075		9.684	1.286		11.84	2.281		13.908	1.737		16.391	1.134		17.174	1.088
																													6.932	1.629		7.699	1.682		9.698	1.554		11.842	1.293		13.912	1.297		16.394	1.08		17.178	1.179
																													6.933	0.824		7.704	1.606		9.698	1.1		11.845	1.489		13.913	1.134		16.394	1.346		17.186	0.908
																													6.934	1.102		7.709	1.036		9.698	1.229		11.846	1.4		13.913	1.204		16.405	1.314		17.191	1.016
																													6.938	1.016		7.713	3.553		9.701	1.63		11.847	0.895		13.917	1.035		16.407	1.245		17.193	1.129
																													6.951	1.337		7.714	1.314		9.704	0.781		11.855	1.348		13.919	1.951		16.418	1.444		17.205	1.696
																													6.951	1.109		7.716	1.17		9.705	1.598		11.856	1.223		13.922	0.744		16.419	0.905		17.209	1.125
																													6.961	1.233		7.718	1.262		9.712	1.099		11.864	1.315		13.924	0.813		16.427	1.483		17.243	1.594
																													6.964	0.88		7.721	0.781		9.716	1.373		11.864	1.05		13.925	1.314		16.431	1.082		17.259	0.787
																													6.968	1.341		7.728	1.152		9.719	1.852		11.865	1.027		13.929	1.305		16.436	1.362		17.268	2.093
																													6.981	0.915		7.733	1.241		9.723	0.663		11.867	1.303		13.937	1.077		16.443	1.404		17.269	1.33
																													6.986	1.209		7.737	1.129		9.725	1.001		11.874	0.616		13.94	1.15		16.448	1.431		17.269	0.912
																													6.989	1.532		7.743	1.049		9.728	1.063		11.879	0.852		13.94	1.513		16.453	1.503		17.271	0.906
																													6.989	1.687		7.743	0.958		9.73	0.901		11.886	1.275		13.946	3.208		16.454	1.003		17.277	1.869
																													6.99	1.183		7.746	1.764		9.731	1.011		11.887	1.215		13.947	0.598		16.461	1.585		17.285	1.355
																													6.99	1.273		7.76	1.086		9.731	3.568		11.89	1.144		13.958	1.268		16.461	1.907		17.309	1.546
																																7.762	1.394		9.733	1.746		11.89	1.159		13.979	1.147		16.463	1.019		17.315	1.778
																													5.02	1.28		7.763	1.524		9.733	1.693		11.893	1.427		13.982	1.102		16.48	1.129		17.317	0.663
																													5.024	1.063		7.766	0.869		9.734	2.243		11.895	0.854		13.989	1.341		16.499	1.507		17.346	1.672
																													5.05	2.315		7.769	1.926		9.734	1.391		11.897	2.873		13.994	1.036		16.501	1.249		17.354	1.463
																													5.052	1.583		7.772	1.393		9.737	0.996		11.897	1.078		13.998	1.475		16.513	1.058		17.357	1.247
																													5.112	0.917		7.775	1.729		9.74	1.295		11.905	1.282		14.001	1.203		16.523	1.184		17.37	1.726
																													5.144	1.086		7.779	1.228		9.743	0.937		11.907	1.157		14.003	1.615		16.534	1.229		17.38	0.927
																													5.239	1.086		7.78	2.221		9.747	1.638		11.907	1.474		14.008	1.033		16.541	0.936		17.401	1.832
																													5.261	2.346		7.784	0.848		9.754	0.955		11.91	1.979		14.014	1.415		16.562	0.75		17.415	1.24
																													5.297	1.431		7.79	1.099		9.755	1.944		11.913	1.143		14.015	1.432		16.567	1.402		17.421	1.497
																													5.31	1.554		7.793	1.203		9.76	1.436		11.913	0.811		14.018	1.304		16.571	0.818		17.429	2.498
																													5.32	1.488		7.794	1.841		9.766	1.506		11.916	1.055		14.019	1.193		16.579	1.923		17.45	0.938
																													5.369	1.633		7.808	1.175		9.766	1.101		11.921	1.359		14.024	1.369		16.584	2.364		17.474	1.809
																													5.382	1.353		7.81	0.96		9.779	1.131		11.931	1.113		14.042	1.031		16.586	1.152		17.477	1.6
																													5.472	1.07		7.814	0.963		9.785	2.28		11.942	1.291		14.043	1.155		16.588	1.507		17.486	1.367
																													5.489	0.956		7.815	1.614		9.787	1.217		11.947	1.704		14.046	1.978		16.599	1.204		17.486	1.313
																													5.495	1.401		7.815	1.875		9.788	1.383		11.947	1.509		14.053	1.384		16.61	1.367		17.505	1.462
																													5.536	0.969		7.816	1.699		9.791	1.101		11.95	1.347		14.056	1.446		16.612	1.843		17.505	0.812
																													5.585	0.804		7.821	1.516		9.792	0.984		11.951	1.603		14.058	1.096		16.615	1.519		17.525	1.207
																													5.609	1.211		7.827	1.288		9.792	1.066		11.954	1.652		14.061	1.523		16.627	1.048		17.536	1.557
																													5.638	1.579		7.831	0.824		9.799	1.135		11.955	1.43		14.067	1.443		16.628	1.13		17.537	1.402
																													5.643	2.687		7.831	0.952		9.805	1.03		11.96	1.111		14.07	1.139		16.629	0.902		17.542	1.094
																													5.648	1.238		7.837	1.283		9.806	1.249		11.961	1.226		14.076	1.112		16.634	2.008		17.553	1.058
																													5.668	1.259		7.838	1.079		9.812	1.38		11.962	1.567		14.077	1.09		16.638	1.308		17.566	1.008
																													5.719	2.065		7.839	0.967		9.819	1.298		11.973	1.291		14.077	0.98		16.641	1.387		17.575	1.21
																													5.764	1.878		7.84	0.986		9.82	1.24		11.975	0.696		14.078	1.155		16.657	1.224		17.582	1.439
																													5.782	1.285		7.844	1.07		9.822	1.477		11.977	1.507		14.079	0.697		16.663	1.455		17.598	1.102
																													5.798	1.023		7.849	0.905		9.824	1.32		11.977	1.514		14.084	1.258		16.665	1.607		17.6	1.627
																													5.845	1.315		7.849	1.132		9.828	0.964		11.979	1.347		14.095	0.999		16.669	0.871		17.604	1.242
																													5.848	1.773		7.849	0.952		9.833	1.133		11.986	1.645		14.098	1.579		16.678	1.218		17.609	0.892
																													5.848	1.386		7.85	3.913		9.836	1.255		11.987	1.084		14.106	1.28		16.683	1.286		17.62	1.035
																													5.851	0.66		7.851	1.134		9.837	1.153		11.994	1.549		14.109	1.76		16.683	1.652		17.623	1.129
																													5.865	1.659		7.851	1.437		9.838	1.145		12.001	0.885		14.11	1.479		16.687	0.894		17.629	1.159
																													5.872	1.152		7.854	1.269		9.84	1.16		12.001	1.085		14.113	1.416		16.688	1.005		17.633	2.029
																													5.876	1.975		7.861	1.43		9.842	1.422		12.002	1.301		14.114	1.151		16.691	1.094		17.638	1.581
																													5.877	1.445		7.866	1.081		9.842	1.518		12.009	1.108		14.115	1.603		16.692	1.353		17.658	1.222
																													5.884	0.878		7.872	1.439		9.848	1.281		12.013	2.234		14.125	1.406		16.703	1.295		17.665	1.941
																													5.892	1.088		7.877	1.422		9.854	1.31		12.017	0.833		14.131	1.721		16.715	0.915		17.665	1.533
																													5.9	2.543		7.878	1.389		9.856	1.131		12.022	1.042		14.132	1.464		16.718	1.252		17.673	1.339
																													5.901	1.143		7.884	1.052		9.862	1.587		12.025	1.206		14.137	1.035		16.721	2.238		17.677	1.264
																													5.945	1.831		7.884	1.386		9.866	1.127		12.027	1.305		14.138	2.117		16.733	0.71		17.696	0.539
																													5.965	1.12		7.888	1.352		9.869	1.125		12.034	1.105		14.138	1.498		16.75	0.86		17.698	0.973
																													5.974	1.569		7.889	1.457		9.874	1.572		12.037	1.541		14.14	0.853		16.751	1.219		17.7	1.966
																													5.977	0.947		7.896	1.077		9.875	0.96		12.042	0.734		14.141	1.68		16.767	1.264		17.705	1.327
																													5.979	1.132		7.898	1.275		9.876	1.317		12.048	1.756		14.144	1.405		16.773	1.022		17.706	1.439
																													5.984	1.447		7.9	1.486		9.877	1.301		12.049	1.223		14.147	1.495		16.788	1.443		17.709	0.615
																													5.987	1.031		7.9	1.225		9.878	1.096		12.054	1.279		14.154	1.241		16.797	1.835		17.723	1.092
																													6.003	1.037		7.902	0.961		9.884	1.221		12.059	1.291		14.16	1.387		16.8	1.005		17.724	1.385
																													6.016	1.119		7.903	0.974		9.884	1.179		12.066	1.274		14.176	1.477		16.813	1.186		17.733	0.724
																													6.078	1.323		7.904	0.802		9.89	1.328		12.068	1.179		14.187	1.592		16.816	0.844		17.754	1.193
																													6.09	2.103		7.904	1.389		9.893	2.055		12.072	2.591		14.187	1.226		16.827	1.217		17.763	1
																													6.091	0.938		7.907	1.45		9.895	1.005		12.079	1.318		14.193	1.376		16.83	1.624		17.764	1.021
																													6.098	1.127		7.91	1.265		9.896	1.899		12.099	0.723		14.193	2.241		16.835	0.829		17.765	1.307
																													6.121	1.027		7.91	1.204		9.896	1.618		12.099	1.386		14.194	1.193		16.837	1.075		17.766	0.949
																													6.131	1.186		7.914	1.812		9.904	1.197		12.1	1.639		14.199	1.145		16.838	1.199		17.776	1.994
																													6.134	1.118		7.92	1.284		9.906	1.408		12.101	1.27		14.2	1.527		16.838	1.196		17.777	1.25
																													6.15	1.258		7.925	2.071		9.911	0.965		12.116	1.979		14.206	1.188		16.846	1.326		17.787	1.194
																													6.169	2.635		7.925	1.499		9.911	1.415		12.118	1.613		14.206	0.939		16.846	1.184		17.791	1.305
																													6.197	1.3		7.927	0.995		9.914	1.16		12.125	1.695		14.215	1.186		16.85	1.301		17.809	1.758
																													6.26	0.989		7.938	1.19		9.917	1.046		12.126	1.286		14.225	1.189		16.863	1.698		17.813	1.314
																													6.277	1.381		7.939	1.532		9.924	1.045		12.132	1.797		14.23	1.548		16.871	1.246		17.813	1.133
																													6.287	1.244		7.942	1.226		9.927	1.061		12.135	0.793		14.237	1.517		16.89	1.101		17.82	1.868
																													6.319	1.26		7.942	2.701		9.928	0.958		12.136	0.945		14.24	0.678		16.891	2.173		17.829	1.942
																													6.335	0.97		7.948	1.313		9.929	1.378		12.139	0.891		14.242	1.625		16.905	1.132		17.83	1.152
																													6.339	1.623		7.958	1.199		9.932	1.402		12.14	1.144		14.244	1.348		16.929	0.666		17.845	1.092
																													6.342	1.182		7.959	1.484		9.934	1.161		12.149	0.974		14.245	1.66		16.946	1.933		17.851	1.244
																													6.347	2.404		7.959	1.05		9.935	1.525		12.151	1.375		14.246	1.545		16.949	1.344		17.855	2.091
																													6.361	1.071		7.964	1.537		9.935	1.621		12.163	1.416		14.246	1.173		16.965	1.16		17.901	1.678
																													6.392	1.279		7.965	1.363		9.939	1.389		12.172	1.89		14.247	1.671		16.966	0.476		17.915	1.188
																													6.429	1.24		7.971	1.351		9.94	1.359		12.174	2.434		14.255	1.142		16.974	1.251		17.919	1.079
																													6.445	1.422		7.975	1.872		9.941	1.316		12.176	0.879		14.26	1.335		16.978	1.442		17.933	1.213
																													6.455	0.86		7.985	0.787		9.945	1.22		12.188	1.564		14.261	2.78		16.978	0.898		17.951	1.005
																													6.46	1.333		7.986	1.015		9.952	1.365		12.191	1.52		14.264	1.237		16.982	1.394		17.975	1.965
																													6.474	1.197		7.989	1.181		9.956	1.243		12.206	1.865		14.269	1.514		16.982	0.731		17.987	1.577
																													6.48	0.827		7.992	0.909		9.964	1.615		12.21	1.425		14.271	1.527		16.985	1.156		17.988	1.605
																													6.522	1.928		7.996	1.058		9.965	1.463		12.213	0.771		14.277	2.075		16.987	1.528		18.061	3.171
																													6.524	1.99		7.997	1.417		9.969	4.779		12.215	1.305		14.286	1.115		16.99	1.274		18.09	1.261
																													6.563	1.917		8.008	1.22		9.969	2.117		12.22	1.153		14.287	1.178		16.99	1.142		18.098	1.206
																													6.577	2.446		8.018	1.114		9.977	1.367		12.222	1.338		14.287	1.076					18.1	2.485
																													6.599	1.412		8.022	1.318		9.982	1.642		12.225	1.451		14.291	0.959		15.013	1.629		18.108	0.72
																													6.654	1.066		8.025	1.248		9.982	1.793		12.227	1.191		14.293	2.113		15.026	0.851		18.115	1.15
																													6.676	1.593		8.029	1.547		9.989	1.032		12.23	0.989		14.296	0.714		15.049	1.356		18.133	0.67
																													6.695	1.295		8.032	1.223		9.989	1.249		12.232	1.069		14.303	1.025		15.054	1.339		18.146	2.022
																													6.699	1.034		8.033	1.175		9.999	1.338		12.235	1.231		14.305	1.517		15.074	0.897		18.166	1.509
																													6.699	1.157		8.042	0.71		10	0.979		12.238	1.088		14.308	1.083		15.078	0.888		18.169	1.297
																													6.701	1.331		8.047	1.381		10	1.424		12.238	1.412		14.311	0.951		15.079	1.069		18.183	0.857
																													6.707	0.816		8.047	0.758		10.012	1.158		12.245	1.305		14.319	1.354		15.083	2.124		18.185	0.765
																													6.72	1.105		8.048	1.149		10.014	2.201		12.246	1.432		14.323	2.166		15.091	2.019		18.186	2.085
																													6.732	0.961		8.053	1.327		10.019	2.007		12.246	1.015		14.335	1.212		15.094	1.429		18.187	1.06
																													6.733	0.894		8.056	1.597		10.024	1.893		12.249	1.295		14.337	1.38		15.119	0.912		18.2	1.093
																													6.74	1.07		8.063	1.274		10.025	1.303		12.256	1.132		14.343	1.15		15.13	1.063		18.202	1.278
																													6.742	1.089		8.072	1.23		10.028	0.95		12.261	2.339		14.346	0.973		15.133	1.135		18.206	1.059
																													6.772	1.317		8.074	2.016		10.032	0.937		12.273	1.588		14.352	1.176		15.141	1.259		18.243	1.192
																													6.779	1.643		8.075	1.349		10.036	1.211		12.281	0.948		14.353	2.781		15.147	1.34		18.245	1.377
																													6.805	0.794		8.079	1.184		10.037	1.288		12.283	2.191		14.365	1.243		15.151	1.233		18.257	1.1
																													6.809	4.072		8.081	1.449		10.043	1.421		12.283	1.248		14.369	1.194		15.154	0.978		18.258	1.437
																													6.845	1.957		8.081	0.977		10.045	1.438		12.296	1.327		14.37	0.776		15.16	0.954		18.264	1.308
																													6.854	1.249		8.085	1.034		10.045	1.708		12.302	1.462		14.372	0.91		15.163	1.189		18.268	0.682
																													6.858	0.704		8.099	1.292		10.046	0.985		12.311	1.645		14.378	1.163		15.172	1.823		18.275	1.292
																													6.861	0.838		8.104	1.274		10.076	1.189		12.317	1.36		14.382	1.413		15.192	1.156		18.306	1.221
																													6.868	1.578		8.104	1.458		10.076	1.327		12.318	1.022		14.4	1.275		15.193	0.847		18.309	1.583
																													6.872	0.842		8.107	1.034		10.078	0.881		12.321	1.068		14.406	1.119		15.2	2.951		18.328	1.372
																													6.878	0.9		8.109	0.854		10.081	1.313		12.326	1.119		14.408	1.436		15.205	1.068		18.331	2.234
																													6.886	1.308		8.11	1.187		10.082	2.093		12.33	1.293		14.41	0.81		15.24	1.096		18.333	1.785
																													6.888	1.746		8.12	1.078		10.088	2.356		12.332	2.524		14.41	0.971		15.245	0.833		18.357	1.765
																													6.888	1.127		8.123	1.345		10.088	1.176		12.333	1.205		14.413	1.758		15.25	1.307		18.357	1.27
																													6.898	1.295		8.131	1.454		10.09	1.484		12.336	1.791		14.414	0.971		15.25	0.925		18.387	1.279
																													6.904	1.149		8.133	0.89		10.091	1.219		12.336	1.254		14.418	0.993		15.253	1.281		18.396	1.173
																													6.911	1.184		8.142	1.68		10.094	1.468		12.34	0.802		14.419	1.572		15.258	1.11		18.413	0.991
																													6.911	2.085		8.151	1.657		10.094	1.22		12.341	1.285		14.42	1.156		15.288	1.168		18.445	0.889
																													6.914	1.215		8.154	1.289		10.098	1.556		12.342	1.037		14.42	1.037		15.292	1.447		18.451	1.232
																													6.957	1.391		8.159	0.99		10.105	1.569		12.348	1.66		14.425	1.17		15.299	1.184		18.481	1.908
																													6.957	1.126		8.161	1.021		10.107	1.161		12.36	1.096		14.426	1.208		15.313	1.095		18.483	2.22
																													6.964	1.057		8.163	1.273		10.115	1.368		12.36	0.82		14.432	1.142		15.329	1.652		18.493	1.32
																													6.969	1.326		8.171	1.318		10.115	1.625		12.36	1.756		14.432	1.161		15.33	2.345		18.513	1.282
																													6.972	2.035		8.172	1.146		10.116	1.407		12.362	1.231		14.433	1.274		15.346	1.324		18.517	1.004
																													6.975	0.923		8.175	1.303		10.116	1.135		12.369	1.185		14.434	1.06		15.348	1.541		18.52	1.817
																													6.976	1.069		8.176	1.346		10.119	1.657		12.374	1.281		14.435	1.173		15.373	0.893		18.52	1.153
																													6.989	1.472		8.176	1.022		10.119	1.033		12.375	1.07		14.437	0.889		15.378	1.691		18.523	1.814
																													6.991	1.483		8.188	1.022		10.122	1.512		12.379	1.058		14.438	1.464		15.394	2.416		18.531	1.14
																													6.993	0.856		8.189	1.134		10.123	1.281		12.389	1.385		14.442	1.073		15.394	1.505		18.533	1.289
																																8.192	1.118		10.131	0.901		12.394	1.641		14.446	1.545		15.395	1.699		18.535	1.36
																													5.186	1.383		8.197	0.994		10.135	1.203		12.396	1.185		14.448	1.158		15.407	1.386		18.545	2.207
																													5.193	1.22		8.197	1.371		10.136	1.031		12.396	1.288		14.46	1.545		15.416	1.626		18.562	2.519
																													5.195	0.802		8.201	1.497		10.137	1.226		12.397	1.941		14.489	1.165		15.426	2.03		18.592	1.513
																													5.214	1.326		8.201	2.329		10.138	0.927		12.397	1.287		14.491	1.251		15.432	1.418		18.598	1.157
																													5.218	1.749		8.205	1.175		10.141	1.171		12.4	0.723		14.495	1.209		15.449	1.019		18.617	0.865
																													5.233	1.577		8.207	0.791		10.143	1.367		12.401	1.507		14.501	2.128		15.451	1.984		18.641	2.633
																													5.25	0.947		8.207	1.024		10.143	1.408		12.403	1.022		14.501	1.205		15.451	2.185		18.642	0.87
																													5.255	1.379		8.212	1.35		10.144	2.265		12.405	0.844		14.504	1.206		15.459	1.321		18.643	1.081
																													5.267	1.613		8.213	1.263		10.144	1.066		12.408	1.107		14.507	0.951		15.465	0.814		18.645	1.91
																													5.28	1.144		8.218	1.163		10.146	1.26		12.409	1.024		14.521	1.52		15.469	0.849		18.651	1.181
																													5.291	0.918		8.226	0.729		10.155	1.246		12.41	1.224		14.522	1.3		15.497	1.356		18.659	1.735
																													5.332	1.262		8.228	1.749		10.165	1.209		12.41	1.618		14.529	1.505		15.501	1.064		18.683	1.245
																													5.333	1.572		8.228	1.277		10.169	1.05		12.415	1.182		14.533	0.934		15.503	0.936		18.716	1.098
																													5.384	1.225		8.231	0.961		10.175	1.939		12.427	0.678		14.539	0.979		15.506	0.921		18.722	1.207
																													5.415	2.239		8.231	1.061		10.177	1.19		12.428	0.987		14.544	0.867		15.515	1		18.726	1.842
																													5.432	1.487		8.233	1.552		10.177	1.806		12.428	1.79		14.544	1.742		15.516	1.679		18.753	1.168
																													5.457	2.113		8.242	1.34		10.179	0.805		12.429	1.185		14.545	1.074		15.523	1.374		18.753	1.089
																													5.483	2.237		8.247	2.252		10.179	0.958		12.437	1.351		14.546	1.167		15.525	2.178		18.778	1.239
																													5.541	0.939		8.248	1.252		10.184	1.23		12.44	1.018		14.546	1.286		15.525	1.37		18.79	1.015
																													5.617	1.59		8.248	1.016		10.191	2.305		12.44	1.63		14.549	1.116		15.533	1.165		18.791	2.647
																													5.627	1.295		8.25	1.552		10.192	0.656		12.442	1.184		14.562	1.386		15.536	3.093		18.794	1.239
																													5.637	1.677		8.255	0.984		10.194	1.375		12.442	1.176		14.565	1.876		15.545	1.294		18.801	1.354
																													5.707	1.46		8.257	1.21		10.195	0.811		12.444	1.649		14.569	1.424		15.551	1.257		18.805	1.129
																													5.709	1.276		8.26	1.037		10.197	1.32		12.445	1.128		14.575	1.332		15.566	1.889		18.817	1.354
																													5.712	2.702		8.261	1.961		10.198	2.46		12.446	0.967		14.575	1.247		15.566	1.939		18.818	0.812
																													5.721	1.22		8.261	1.736		10.204	1.144		12.447	1.611		14.575	1.538		15.575	1.566		18.821	0.945
																													5.735	0.969		8.262	1.5		10.209	1.228		12.45	1.524		14.578	0.948		15.578	1.711		18.822	1.109
																													5.763	1.351		8.266	1.695		10.212	0.877		12.453	1.528		14.578	1.281		15.583	0.984		18.825	1.214
																													5.848	1.382		8.268	0.756		10.212	1.079		12.457	1.225		14.58	1.325		15.608	0.64		18.826	0.984
																													5.881	0.85		8.269	0.759		10.215	1.495		12.458	1.243		14.58	1.627		15.609	0.873		18.839	1.831
																													5.889	1.914		8.269	0.834		10.231	1.326		12.459	1.179		14.586	0.877		15.613	2.453		18.841	1.395
																													5.89	1.076		8.271	0.778		10.234	1.501		12.46	0.975		14.589	1.254		15.62	1.038		18.859	2.017
																													5.905	1.296		8.28	1.077		10.236	0.686		12.47	1.357		14.589	1.249		15.621	1.565		18.88	1.399
																													5.919	1.552		8.29	1.144		10.238	2.037		12.473	1.366		14.59	1.62		15.627	1.014		18.883	1.439
																													5.922	1.993		8.293	0.852		10.238	1.038		12.478	1.314		14.595	1.445		15.629	1.36		18.915	2.312
																													5.94	1.225		8.298	1.344		10.239	1.5		12.48	1.387		14.602	0.941		15.63	1.351		18.92	0.943
																													5.945	2.211		8.305	1.165		10.239	1.376		12.48	1.85		14.604	1.003		15.643	0.808		18.933	1.372
																													5.978	1.513		8.309	1.851		10.241	1.414		12.483	1.361		14.622	1.224		15.655	1.286		18.936	1.266
																													6.032	1.274		8.31	1.162		10.241	1.355		12.483	1.297		14.626	0.696		15.672	1.715		18.95	1.173
																													6.033	1.487		8.312	3.434		10.241	1.454		12.49	1.107		14.63	1.164		15.676	1.853		18.957	2.049
																													6.076	1.818		8.32	0.998		10.245	1.455		12.491	1.198		14.635	1.329		15.678	1.055		18.961	0.892
																													6.093	0.937		8.33	1.325		10.247	1.431		12.505	1.157		14.638	1.558		15.686	1.739		18.992	1.683
																													6.116	0.962		8.331	1.476		10.253	0.692		12.508	1.341		14.644	1.27		15.692	1.489		18.999	1.28
																													6.116	1.444		8.334	1.26		10.258	1.588		12.509	1.27		14.644	1.165		15.694	1.568
																													6.119	1.188		8.336	1.031		10.259	1.348		12.51	1.232		14.645	0.973		15.701	1.356		17.008	1.269
																													6.13	1.274		8.344	1.494		10.26	1.277		12.51	0.989		14.665	0.972		15.704	1.266		17.022	2.533
																													6.136	1.96		8.347	1.692		10.272	1.032		12.512	1.158		14.671	1.038		15.708	1.081		17.038	1.392
																													6.16	1.625		8.348	1.072		10.276	1.117		12.522	1.653		14.677	0.847		15.709	1.651		17.047	1.077
																													6.178	3.276		8.352	1.465		10.278	1.752		12.524	1.648		14.68	1.032		15.71	1.078		17.064	1.316
																													6.201	1.728		8.353	1.303		10.281	1.773		12.532	2.021		14.681	1.143		15.711	1.98		17.065	1.334
																													6.202	1.716		8.368	1.704		10.284	1.327		12.55	1.649		14.694	0.817		15.742	1.334		17.067	1.627
																													6.218	1.486		8.374	1.93		10.288	1.32		12.554	1.436		14.695	2.102		15.751	1.557		17.075	1.168
																													6.247	1.367		8.377	1.588		10.291	1.222		12.557	1.018		14.699	0.787		15.754	1.451		17.081	1.215
																													6.254	1.984		8.381	0.809		10.291	1.103		12.562	1.713		14.705	1.352		15.761	1.347		17.093	1.639
																													6.272	1.637		8.382	1.904		10.291	0.957		12.564	1.266		14.708	1.277		15.764	1.401		17.094	2.361
																													6.283	1.753		8.387	2.084		10.296	1.342		12.564	1.488		14.71	1.139		15.795	2.62		17.095	1.273
																													6.288	1.152		8.39	1.013		10.297	0.962		12.567	1.597		14.732	1.27		15.799	1.149		17.096	1.677
																													6.291	0.998		8.395	1.539		10.301	1.05		12.568	1.344		14.732	1.724		15.821	1.821		17.112	1.223
																													6.308	2.049		8.401	1.444		10.306	0.872		12.571	0.858		14.738	1.533		15.833	1.779		17.112	2.068
																													6.328	2.849		8.401	1.171		10.308	1.299		12.582	1.031		14.744	1.278		15.833	1.067		17.119	1.889
																													6.345	1.423		8.401	1.21		10.31	1.474		12.589	1.371		14.744	2.188		15.84	1.119		17.13	0.868
																													6.353	0.64		8.407	1.009		10.322	1.436		12.59	1.087		14.752	1.519		15.842	1.703		17.132	1.617
																													6.37	1.246		8.409	0.751		10.322	1.195		12.603	1.064		14.759	1.321		15.888	1.244		17.147	1.38
																													6.371	1.98		8.411	0.858		10.325	1.057		12.612	1.713		14.759	1.318		15.892	1.391		17.158	2.093
																													6.373	1.234		8.412	1.157		10.326	1.198		12.616	1.105		14.759	1.609		15.929	1.628		17.159	0.945
																													6.373	1.153		8.414	1.249		10.328	1.291		12.62	1.262		14.773	1.124		15.931	1.095		17.175	1.38
																													6.387	1.081		8.42	1.356		10.334	1.244		12.626	0.891		14.775	1.049		15.931	1.231		17.178	1.271
																													6.387	1.436		8.422	0.964		10.334	1.22		12.628	1.39		14.778	1.281		15.933	1.289		17.182	1.085
																													6.401	1.286		8.422	1.257		10.34	1.234		12.628	1.726		14.782	1.321		15.935	1.52		17.189	0.837
																													6.407	1.534		8.423	0.97		10.347	1.208		12.631	1.998		14.783	1.24		15.943	1.061		17.205	1.551
																													6.43	1.624		8.426	2.446		10.349	1.356		12.633	2.222		14.786	1.159		15.946	0.678		17.215	1.367
																													6.439	2.199		8.427	1.758		10.35	1.96		12.638	1.672		14.786	1.125		15.956	1.04		17.251	1.136
																													6.441	1.123		8.431	1.079		10.354	0.925		12.64	1.154		14.786	1.451		15.959	1.74		17.254	1.761
																													6.452	1.284		8.431	0.965		10.355	1.397		12.644	1.701		14.788	1.5		15.964	1.781		17.261	0.766
																													6.465	1.162		8.435	0.932		10.362	2.128		12.645	0.977		14.788	1.622		15.973	2.546		17.261	0.526
																													6.469	1.963		8.437	0.863		10.363	1.179		12.646	1.475		14.79	1.356		15.994	1.336		17.271	1.67
																													6.475	1.877		8.438	1.265		10.365	1.152		12.647	1.534		14.794	1.146		15.999	1.139		17.277	0.763
																													6.487	1.308		8.44	1.375		10.367	1.338		12.647	1.444		14.799	1.122		16.001	1.297		17.283	1.198
																													6.489	2.049		8.441	1.077		10.37	2.019		12.647	1.485		14.799	0.905		16.012	1.172		17.284	1.211
																													6.49	1.186		8.445	1.387		10.373	1.409		12.648	0.806		14.804	1.413		16.018	1.114		17.29	1.173
																													6.541	3.16		8.448	1.327		10.374	1.771		12.648	1.432		14.804	1.302		16.041	1.709		17.295	1.704
																													6.552	2.369		8.451	1.281		10.376	1.919		12.649	1.974		14.808	1.253		16.054	1.227		17.304	1.468
																													6.562	1.349		8.451	1.445		10.38	1.1		12.652	0.929		14.816	1.065		16.062	1.132		17.322	0.929
																													6.567	1.978		8.453	1.754		10.381	1.016		12.653	1.374		14.818	1.042		16.064	0.659		17.322	1.473
																													6.574	1.422		8.455	1.361		10.383	1.176		12.655	1.147		14.824	1.101		16.065	1.652		17.329	1.322
																													6.577	1.226		8.464	1.023		10.388	1.585		12.656	1.147		14.824	1.035		16.068	1.209		17.343	0.792
																													6.581	1.281		8.465	1.93		10.392	1.174		12.657	1.159		14.84	1.564		16.075	0.992		17.347	1.038
																													6.588	1.696		8.468	1.048		10.394	1.254		12.659	1.285		14.84	0.965		16.075	1.24		17.366	1.622
																													6.595	1.989		8.472	1.067		10.405	1.485		12.669	0.916		14.85	1.155		16.098	1.655		17.37	1.011
																													6.601	1.412		8.474	1.535		10.409	1.503		12.673	1.197		14.855	0.899		16.113	1.371		17.37	1.067
																													6.605	0.85		8.476	1.314		10.41	1.438		12.679	1.055		14.857	1.491		16.116	1.649		17.373	1.827
																													6.608	1.355		8.477	1.292		10.414	2.061		12.681	1.48		14.859	1.052		16.117	1.014		17.377	1.178
																													6.616	1.17		8.486	1.414		10.415	1.143		12.683	0.888		14.867	1.601		16.117	1.565		17.382	1.091
																													6.623	1.821		8.486	1.619		10.415	0.717		12.685	1.07		14.87	1.916		16.125	0.979		17.396	1.291
																													6.632	0.932		8.488	1.762		10.415	1.548		12.691	1.42		14.87	1.158		16.131	1.718		17.4	1.405
																													6.64	1.177		8.489	1.197		10.417	1.556		12.695	0.919		14.88	1.266		16.135	1.009		17.404	1.219
																													6.64	1.62		8.494	1.481		10.418	0.896		12.699	1.551		14.893	1.302		16.143	0.86		17.406	1.826
																													6.656	1.148		8.495	1.155		10.418	1.062		12.7	1.477		14.902	1.571		16.148	1.258		17.409	1.142
																													6.666	3.181		8.496	1.308		10.421	0.98		12.719	0.992		14.906	1.963		16.154	1.046		17.412	1.708
																													6.687	1.605		8.497	1.258		10.428	1.228		12.726	1.78		14.912	1.787		16.163	1.131		17.416	2.56
																													6.688	1.265		8.497	1.333		10.432	1.329		12.727	2.075		14.914	1.666		16.167	1.383		17.417	1.18
																													6.69	2.279		8.498	1.241		10.436	1.463		12.727	1.064		14.916	0.968		16.171	1.05		17.417	1.094
																													6.691	1.437		8.515	1.207		10.454	0.975		12.73	1.438		14.916	0.997		16.183	1.688		17.423	1.341
																													6.698	1.618		8.519	1.32		10.464	0.959		12.731	1.328		14.93	1.167		16.2	2.106		17.433	1.03
																													6.705	2.021		8.519	1.272		10.464	1.306		12.735	1.754		14.932	1.061		16.208	1.477		17.435	1.418
																													6.717	1.591		8.525	1.264		10.469	1.294		12.738	1.177		14.94	1.474		16.217	1.508		17.447	1.299
																													6.731	1.668		8.534	1.129		10.476	1.525		12.738	1.131		14.94	1.323		16.218	1.327		17.46	1.564
																													6.739	1.608		8.547	1.364		10.479	0.693		12.774	1.608		14.945	1.009		16.221	1.302		17.46	1.714
																													6.75	1.046		8.548	1.152		10.481	1.099		12.781	1.095		14.949	1.718		16.228	1.534		17.461	1.4
																													6.754	0.939		8.551	1.497		10.482	1.082		12.781	1.08		14.955	0.988		16.235	1.461		17.462	1.146
																													6.76	1.581		8.551	1.11		10.483	1.38		12.783	1.305		14.956	1.175		16.247	1.415		17.464	0.931
																													6.762	1.6		8.559	1.072		10.483	0.86		12.784	0.923		14.958	1.353		16.249	0.965		17.464	1.272
																													6.763	1.652		8.561	1.385		10.485	1.175		12.787	1.232		14.958	0.837		16.25	1.013		17.479	1.469
																													6.772	0.742		8.571	1.178		10.489	1.145		12.789	1.245		14.964	1.926		16.277	1.233		17.488	2.049
																													6.778	1.627		8.571	1.11		10.49	1.129		12.791	1.306		14.966	1.929		16.288	1.467		17.498	1.225
																													6.781	1.51		8.573	1.25		10.491	1.362		12.791	1.486		14.969	1.275		16.292	1.34		17.5	1.797
																													6.785	1.779		8.574	2.456		10.491	1.175		12.796	1.082		14.972	0.872		16.296	0.757		17.506	1.285
																													6.786	1.523		8.575	0.88		10.494	1.412		12.801	0.995		14.973	1.32		16.296	1.562		17.507	1.368
																													6.787	1.164		8.58	1.228		10.495	1.546		12.806	1.866		14.973	0.776		16.303	1.477		17.507	1.999
																													6.788	1.391		8.591	1.676		10.498	1.685		12.812	1.106		14.979	0.647		16.306	1.639		17.511	1.488
																													6.805	2.985		8.592	2.93		10.5	1.594		12.816	1.209		14.98	1.042		16.327	1.354		17.513	1.096
																													6.808	0.802		8.593	1.124		10.503	2.146		12.822	2.085		14.987	1.392		16.331	0.709		17.528	1.185
																													6.823	1.117		8.598	1.217		10.505	1.416		12.823	1.374		14.994	1.622		16.345	1.516		17.531	1.21
																													6.833	1.244		8.598	1.139		10.506	2.108		12.824	1.196		14.998	1.133		16.374	1.404		17.533	1.563
																													6.844	1.001		8.604	1.901		10.509	1.491		12.827	0.918					16.376	1.772		17.54	1.525
																													6.867	1.443		8.607	1.197		10.509	2.193		12.831	1.18		13.004	1.539		16.379	1.424		17.541	0.73
																													6.875	1.334		8.607	1.121		10.51	1.608		12.839	1.471		13.018	1.693		16.395	1.307		17.542	1.661
																													6.875	1.139		8.61	2.205		10.511	1.02		12.84	1.125		13.025	1.024		16.398	1.521		17.554	0.894
																													6.876	1.272		8.613	1.295		10.511	1.513		12.841	1.294		13.033	1.188		16.402	1.786		17.583	1.702
																													6.91	2.37		8.619	1.398		10.52	1.048		12.845	1.723		13.053	1.711		16.403	1.428		17.586	1.307
																													6.923	1.351		8.622	1.206		10.523	1.762		12.845	1.203		13.074	1.432		16.408	0.862		17.594	1.403
																													6.926	1.136		8.625	0.918		10.525	1.593		12.846	1.237		13.084	2.148		16.415	1.434		17.601	1.068
																													6.927	2.28		8.628	1.539		10.53	1.203		12.846	0.728		13.085	0.887		16.42	1.8		17.603	1.075
																													6.932	1.244		8.63	2.594		10.533	0.895		12.854	0.933		13.09	0.904		16.443	1.62		17.605	1.31
																													6.936	1.144		8.636	1.407		10.54	1.445		12.855	1.773		13.103	1.047		16.446	1.341		17.615	1.406
																													6.939	1.998		8.641	1.108		10.546	1.396		12.856	1.363		13.106	0.967		16.451	1.085		17.617	1.101
																													6.945	1.42		8.641	1.707		10.552	1.705		12.858	0.841		13.11	1.348		16.458	2.44		17.627	1.204
																													6.959	1.461		8.644	0.988		10.553	0.843		12.86	1.86		13.112	0.794		16.477	1.029		17.628	2.084
																													6.963	1.397		8.646	1.473		10.554	1.375		12.867	1.192		13.114	1.276		16.487	1.339		17.629	2.136
																													6.969	1.508		8.646	1.219		10.555	1.037		12.879	1.449		13.126	1.171		16.522	2.271		17.631	1.148
																													6.977	1.328		8.648	1.464		10.559	1.113		12.882	0.967		13.147	1.434		16.522	1.115		17.642	1.107
																													6.984	1.407		8.649	1.416		10.56	1.198		12.883	1.184		13.152	1.848		16.523	1.125		17.648	1.552
																													6.985	1.404		8.652	1.042		10.562	1.009		12.896	1.376		13.152	1.552		16.527	2.541		17.656	1.428
																													6.991	1.64		8.654	2.338		10.565	1.198		12.9	1.441		13.164	1.671		16.532	1.21		17.656	1.292
																													6.995	1.727		8.654	0.98		10.569	1.48		12.904	1.06		13.178	1.749		16.535	1.98		17.659	1.212
																																8.658	1.284		10.572	1.258		12.904	1.786		13.181	0.939		16.553	1.025		17.669	1.461
																													5.026	1.494		8.663	1.242		10.572	1.162		12.908	1.347		13.185	1.268		16.561	1.347		17.671	0.948
																													5.137	1.477		8.664	1.018		10.572	1.331		12.91	1.179		13.199	1.346		16.564	1.369		17.674	1.087
																													5.153	1.754		8.665	1.46		10.573	1.04		12.911	1.4		13.21	3.692		16.575	1.297		17.707	1.351
																													5.161	1.38		8.667	1.067		10.587	1.217		12.926	1.286		13.223	1.078		16.585	0.934		17.714	0.813
																													5.183	1.171		8.667	1.23		10.598	1.345		12.928	1.416		13.234	1.369		16.593	1.279		17.715	0.911
																													5.246	1.347		8.668	0.957		10.598	1.535		12.928	1.629		13.234	0.893		16.594	1.579		17.725	1.476
																													5.277	0.925		8.668	1.787		10.601	1.385		12.932	1.219		13.234	1.007		16.594	0.95		17.733	1.115
																													5.281	4.181		8.669	1.443		10.604	1.36		12.942	1.069		13.238	1.61		16.596	1.393		17.735	1.126
																													5.315	1.308		8.68	1.594		10.607	1.223		12.944	1.027		13.241	1.387		16.615	0.881		17.749	0.896
																													5.365	1.259		8.682	1.52		10.607	1.043		12.946	1.429		13.241	1.325		16.624	0.994		17.753	1.426
																													5.37	1.124		8.687	1.409		10.608	1.503		12.952	1.463		13.274	1.34		16.637	1.735		17.756	1.773
																													5.382	1.931		8.688	1.095		10.608	1.413		12.961	1.827		13.277	0.883		16.661	1.149		17.763	1.36
																													5.385	1.557		8.689	1.271		10.61	1.114		12.961	0.992		13.29	1.007		16.663	1.213		17.765	1.39
																													5.386	0.961		8.689	1.513		10.615	1.072		12.963	1.238		13.296	1.386		16.664	1.088		17.767	1.114
																													5.393	1.576		8.691	1.055		10.619	1.264		12.966	1.67		13.299	1.367		16.68	1.469		17.769	1.605
																													5.394	1.152		8.691	0.799		10.62	1.27		12.969	0.697		13.318	1.128		16.693	1.116		17.779	1.672
																													5.4	1.573		8.696	1.041		10.624	1.323		12.974	1.1		13.327	1.517		16.694	2.014		17.78	2.124
																													5.402	1.16		8.696	1.175		10.634	0.672		12.976	1.551		13.331	1.287		16.696	1.239		17.78	1.835
																													5.425	1.273		8.699	1.345		10.634	1.334		12.977	1.368		13.345	1.156		16.701	0.928		17.781	1.121
																													5.431	1.145		8.699	2.544		10.634	1.158		12.978	1.44		13.346	1.221		16.703	2.062		17.786	1.253
																													5.435	1.025		8.7	1.004		10.637	2.503		12.98	1.076		13.363	1.261		16.723	1.666		17.788	0.987
																													5.435	1.567		8.704	1.56		10.641	1.297		12.982	1.526		13.364	1.875		16.725	2.338		17.788	1.266
																													5.444	1.378		8.71	1.845		10.643	1.09		12.982	1.325		13.379	1.738		16.736	1.083		17.79	1.009
																													5.45	0.852		8.71	0.911		10.643	1.404		12.986	1.285		13.398	0.938		16.737	1.896		17.79	2.359
																													5.483	1.05		8.714	1.526		10.643	1.433		12.986	0.885		13.4	1.303		16.737	1.277		17.801	0.801
																													5.489	1.389		8.717	0.85		10.646	1.184		12.996	1.233		13.406	1.187		16.738	1.146		17.802	1.306
																													5.496	3.423		8.72	1.702		10.649	1.545		12.997	1.431		13.409	1.196		16.739	0.957		17.803	2.493
																													5.511	0.951		8.72	1.284		10.649	0.885					13.414	0.885		16.74	2.053		17.809	1.803
																													5.525	1.004		8.721	1.306		10.652	1.427		11.008	1.204		13.415	1.02		16.754	1.051		17.812	2.454
																													5.531	1.707		8.724	1.218		10.652	1.051		11.011	1.061		13.421	0.942		16.757	1.269		17.812	1.347
																													5.565	0.681		8.727	0.778		10.656	2.251		11.016	0.78		13.441	1.103		16.769	1.484		17.819	1.077
																													5.593	1.354		8.73	1.075		10.659	1.437		11.021	2.867		13.453	1.148		16.776	1.027		17.824	0.966
																													5.594	1.578		8.731	0.946		10.66	0.911		11.025	1.654		13.472	1.455		16.782	1.54		17.827	1.52
																													5.598	1.259		8.735	1.09		10.662	0.975		11.025	1.051		13.494	1.802		16.795	2.18		17.832	1.277
																													5.615	1.472		8.739	1.048		10.671	1.128		11.026	1.061		13.502	1.603		16.805	1.009		17.838	1.498
																													5.615	1.088		8.744	3.188		10.675	0.965		11.027	1.362		13.506	1.396		16.812	1.875		17.839	1.36
																													5.623	1.688		8.747	0.93		10.677	1.07		11.043	1.781		13.509	1.066		16.816	2.221		17.839	1.256
																													5.624	1.717		8.752	0.806		10.684	1.887		11.047	1.146		13.516	2.215		16.82	1.641		17.845	1.934
																													5.636	1.065		8.752	1.643		10.686	0.737		11.065	1.531		13.522	1.432		16.82	1.104		17.849	1.318
																													5.638	1.989		8.758	1.115		10.688	0.983		11.071	1.09		13.531	0.972		16.828	1.721		17.85	1.76
																													5.647	1.289		8.759	1.274		10.689	1.325		11.072	1.947		13.556	1.613		16.834	1.147		17.877	1.361
																													5.666	1.193		8.761	1.084		10.69	1.264		11.08	1.546		13.563	1.456		16.861	2.233		17.879	1.192
																													5.676	1.943		8.762	1.803		10.691	1.497		11.09	1.32		13.564	1.346		16.871	0.994		17.88	1.801
																													5.677	2.324		8.769	1.649		10.694	1.248		11.118	1.296		13.573	0.928		16.876	0.987		17.882	1.812
																													5.701	1.041		8.77	1.224		10.721	1.377		11.122	1.108		13.576	1.082		16.882	2.171		17.883	1.515
																													5.702	1.974		8.776	1.319		10.722	1.214		11.123	0.849		13.581	1.005		16.897	1.539		17.888	1.665
																													5.717	1.374		8.777	1.086		10.722	1.796		11.125	1.304		13.594	1.479		16.898	1.432		17.889	0.92
																													5.72	0.951		8.783	1.357		10.724	1.869		11.137	2.027		13.595	2.734		16.898	1.365		17.89	1.746
																													5.729	1.561		8.796	2.024		10.726	1.817		11.139	1.542		13.599	1.592		16.916	0.986		17.892	2.199
																													5.746	1.411		8.8	1.942		10.73	1.378		11.142	1.696		13.614	1.349		16.921	0.78		17.898	2.794
																													5.751	2.498		8.801	1.328		10.732	1.07		11.15	1.329		13.616	0.974		16.923	1.902		17.912	1.291
																													5.764	2.001		8.802	1.146		10.737	1.414		11.163	1.254		13.625	1.365		16.927	2.094		17.919	1.213
																													5.776	1.449		8.804	0.872		10.75	1.223		11.165	1.194		13.635	0.79		16.936	1.514		17.937	0.789
																													5.792	1.546		8.807	1.23		10.752	1.353		11.178	1.225		13.637	1.121		16.942	1.952		17.953	1.23
																													5.834	1.115		8.81	1.133		10.759	1.097		11.185	1.534		13.647	1.067		16.946	1.685		17.953	2.026
																													5.845	0.89		8.813	1.484		10.76	1.449		11.185	0.657		13.65	1.475		16.947	1.002		17.956	1.475
																													5.868	1.523		8.813	1.624		10.762	1.109		11.212	1.319		13.658	2.377		16.965	1.416		17.967	1.488
																													5.913	1.195		8.824	2.049		10.763	1.296		11.216	1.08		13.673	2.213		16.966	1.113		17.984	1.056
																													5.919	1.839		8.825	1.241		10.773	1.106		11.219	1.9		13.678	1.495		16.978	1.18		17.984	1.513
																													5.92	1.274		8.829	1.237		10.779	1.338		11.219	1.168		13.681	1.396		16.991	1.224		17.988	1.37
																													5.93	2.001		8.829	0.678		10.78	1.601		11.227	1.203		13.685	2.081		16.992	1.106		17.994	2.65
																													5.963	1.473		8.831	1.426		10.788	0.868		11.228	2.302		13.692	1.427					17.998	1.104
																													5.966	2.135		8.834	1.441		10.795	1.149		11.233	2.777		13.7	0.868		15.011	1.551		18.007	1.129
																													5.981	0.935		8.835	1.912		10.806	0.93		11.239	2.476		13.708	0.766		15.017	0.8		18.014	0.849
																													6.018	1.256		8.839	1.31		10.809	1.117		11.241	2.025		13.713	1.747		15.033	1.223		18.019	1.321
																													6.022	1.6		8.839	1.504		10.82	0.925		11.244	1.319		13.713	1.91		15.044	1.071		18.023	1.387
																													6.024	2.22		8.847	1.155		10.824	1.207		11.261	1.611		13.74	0.481		15.05	1.741		18.035	0.972
																													6.034	1.661		8.847	1.384		10.826	1.124		11.262	1.926		13.747	1.182		15.051	1.865		18.036	0.64
																													6.035	1.241		8.851	1.302		10.827	1.131		11.263	1.711		13.759	1.186		15.06	0.881		18.04	1.064
																													6.038	1.31		8.856	1.365		10.827	1.36		11.272	0.835		13.764	0.858		15.075	1.139		18.049	1.32
																													6.043	2.422		8.856	1.164		10.833	1.143		11.272	1.659		13.765	1.805		15.077	1.368		18.054	1.663
																													6.054	1.349		8.86	1.048		10.839	1.549		11.273	1.554		13.766	1.856		15.083	1.442		18.075	2.156
																													6.057	1.542		8.861	1.262		10.84	1.306		11.275	1.359		13.767	1.197		15.089	1.058		18.082	1.146
																													6.058	1.642		8.866	1.538		10.843	0.95		11.287	1.473		13.77	1.739		15.097	0.939		18.083	1.489
																													6.071	1.862		8.866	3.158		10.843	1.613		11.289	1.326		13.783	1.563		15.106	1.396		18.101	1.25
																													6.089	0.681		8.868	1.241		10.846	1.217		11.291	1.809		13.784	1.594		15.114	0.972		18.106	1.491
																													6.104	1.546		8.869	1.031		10.849	1.064		11.294	1.335		13.79	1.078		15.124	0.82		18.114	1.719
																													6.104	2.766		8.872	2.165		10.851	1.149		11.294	1.977		13.796	1.54		15.134	1.182		18.144	1.764
																													6.122	1.585		8.876	0.938		10.853	1.15		11.304	1.238		13.797	1.721		15.146	1.181		18.146	0.931
																													6.158	1.222		8.887	1.782		10.854	0.944		11.305	1.917		13.809	1.431		15.151	1.512		18.149	1.44
																													6.185	1.914		8.893	1.434		10.857	1.375		11.305	1.384		13.815	0.998		15.156	1.268		18.155	1.948
																													6.195	0.874		8.897	1.487		10.859	1.082		11.307	1.376		13.82	1.328		15.158	1.209		18.155	0.572
																													6.202	1.215		8.897	0.918		10.86	1.419		11.311	0.929		13.824	1.553		15.158	0.987		18.167	0.799
																													6.204	1.294		8.899	0.959		10.861	1.455		11.313	1.575		13.83	2.104		15.185	1.341		18.177	1.381
																													6.214	1.754		8.91	1.175		10.867	0.98		11.318	0.913		13.852	1.428		15.193	1.552		18.195	2.107
																													6.218	1.61		8.914	1.057		10.877	1.293		11.331	1.605		13.855	1.311		15.197	1.337		18.199	1.151
																													6.227	1.512		8.915	1.037		10.878	1.241		11.343	1.61		13.871	1.852		15.202	1.146		18.199	1.979
																													6.231	1.407		8.919	0.762		10.88	1.158		11.357	1.046		13.877	1.348		15.206	1.576		18.213	1.607
																													6.268	1.635		8.932	1.346		10.882	1.115		11.358	1.282		13.889	0.579		15.206	1.474		18.219	1.185
																													6.271	1.342		8.939	1.079		10.884	1.092		11.36	1.183		13.906	2.295		15.207	2.413		18.229	1.487
																													6.274	1.159		8.945	2.754		10.885	0.95		11.361	1.618		13.909	1.459		15.207	0.937		18.237	1.606
																													6.282	1.37		8.956	1.451		10.888	1.232		11.372	1.542		13.909	1.534		15.21	1.062		18.239	1.464
																													6.299	1.271		8.957	0.661		10.89	1.996		11.38	1.14		13.911	0.996		15.226	1.151		18.24	1.593
																													6.302	1.386		8.96	1.358		10.892	1.461		11.381	1.237		13.919	1.352		15.227	1.653		18.256	1.312
																													6.308	1.499		8.96	1.232		10.893	1.305		11.382	1.407		13.926	1.507		15.231	1.52		18.257	1.195
																													6.312	1.445		8.961	1.56		10.896	1.354		11.385	1.144		13.941	0.949		15.25	1.449		18.276	1.262
																													6.313	1.567		8.966	1.016		10.9	1.054		11.388	2.439		13.942	0.89		15.252	3.052		18.282	1.135
																													6.332	1.364		8.966	1.717		10.909	0.955		11.389	1.893		13.953	1.13		15.254	1.209		18.282	1.258
																													6.355	1.46		8.968	1.175		10.916	1.066		11.397	0.909		13.964	0.968		15.258	1.398		18.282	1.3
																													6.37	2.244		8.97	0.971		10.923	1.471		11.401	2.953		13.97	0.942		15.26	1.61		18.288	0.992
																													6.377	1.053		8.972	1.054		10.927	1.397		11.403	1.018		13.975	0.762		15.262	1.028		18.307	0.989
																													6.377	1.457		8.978	0.885		10.929	1.905		11.408	1.152		13.976	1.346		15.271	1.214		18.322	1.146
																													6.381	2.574		8.984	1.183		10.929	0.911		11.409	1.573		13.985	1.404		15.272	1.705		18.332	1.26
																													6.381	0.976		8.985	1.479		10.932	1.096		11.421	1.499		13.994	1.333		15.275	1.158		18.336	1.51
																													6.388	1.19					10.938	2.23		11.429	1.078		14.002	1.526		15.276	1.796		18.342	1.259
																													6.393	2.246		7.007	0.991		10.943	1.15		11.432	1.13		14.032	1.551		15.283	1.245		18.343	1.168
																													6.394	1.229		7.036	0.934		10.954	1.197		11.469	0.981		14.035	0.982		15.284	1.762		18.352	1.161
																													6.401	1.249		7.056	2.517		10.954	1.218		11.471	1.309		14.036	1.039		15.284	1.39		18.374	0.93
																													6.407	1.933		7.058	0.867		10.958	1.057		11.475	1.29		14.042	1.572		15.297	0.92		18.375	1.924
																													6.418	1.607		7.083	1.241		10.961	1.273		11.478	1.915		14.053	1.204		15.298	1.388		18.381	1.205
																													6.438	1.561		7.104	2.999		10.962	1.334		11.492	1.436		14.054	1.71		15.305	1.454		18.385	1.811
																													6.438	1.047		7.138	1.256		10.967	2.61		11.501	1.391		14.056	1.278		15.321	2.184		18.397	1.391
																													6.467	1.215		7.156	1.315		10.976	1.656		11.51	1.359		14.082	1.126		15.322	1.45		18.414	1.399
																													6.469	1.212		7.163	1.111		10.979	1.28		11.513	1.184		14.099	1.101		15.324	0.974		18.421	1.423
																													6.473	1.521		7.176	1.483		10.98	1.61		11.531	2.093		14.101	1.151		15.328	1.348		18.437	1.202
																													6.49	0.941		7.179	1.965		10.981	1.546		11.543	1.678		14.106	2.237		15.329	0.972		18.443	1.502
																													6.492	1.85		7.228	1.197		10.984	0.894		11.561	1.396		14.113	1.245		15.339	1.672		18.45	0.98
																													6.521	0.786		7.267	1.175		10.991	1.175		11.568	1.161		14.132	1.166		15.344	0.949		18.458	1.285
																													6.526	1.397		7.269	0.987		10.996	1.434		11.571	2.722		14.142	1.052		15.349	1.738		18.46	1.328
																													6.53	1.307		7.274	1.375		10.997	3.581		11.575	2.016		14.156	1.067		15.354	1.278		18.461	0.724
																													6.533	1.337		7.289	1.197		10.999	1.278		11.584	1.3		14.161	1.731		15.36	1.171		18.478	1.275
																													6.541	1.507		7.305	2.578					11.593	1.458		14.164	1.325		15.363	0.636		18.492	1.508
																													6.546	1.325		7.305	1.409		9.001	1.019		11.598	1.078		14.175	1.189		15.366	1.267		18.497	1.402
																													6.555	1.012		7.312	1.281		9.005	1.045		11.604	1.395		14.184	1.096		15.376	1.381		18.499	3.062
																													6.558	0.707		7.314	1.324		9.012	1.148		11.614	1.756		14.189	1.301		15.378	1.041		18.503	1.247
																													6.566	1.147		7.329	1.31		9.013	0.882		11.618	1.276		14.193	1.899		15.382	1.671		18.503	1.721
																													6.571	0.952		7.33	0.921		9.016	1.481		11.618	1.407		14.193	1.187		15.383	1.289		18.512	1.304
																													6.606	1.628		7.339	0.976		9.033	1.636		11.621	1.205		14.199	1.504		15.391	1.16		18.514	1.091
																													6.607	0.866		7.34	1.392		9.043	1.311		11.637	1.65		14.204	1.184		15.395	1.303		18.517	1.324
																													6.616	2.363		7.348	2.679		9.049	1.27		11.639	0.848		14.205	1.021		15.401	1.362		18.523	1.32
																													6.625	2.428		7.353	1.29		9.05	1.218		11.648	1.404		14.228	1.186		15.403	2.131		18.526	1.455
																													6.631	1.291		7.372	0.94		9.066	1.455		11.653	1.309		14.229	1.571		15.407	1.83		18.54	1.22
																													6.634	2.131		7.387	1.884		9.07	1.232		11.654	1.187		14.231	0.719		15.411	1.707		18.549	2.048
																													6.636	1.1		7.389	1.268		9.076	0.893		11.659	2.047		14.233	1.879		15.411	1.374		18.554	0.876
																													6.656	1.243		7.399	2.859		9.079	0.537		11.659	1.255		14.254	1.144		15.42	0.888		18.555	0.746
																													6.658	1.441		7.425	1.322		9.083	2.076		11.664	1.146		14.257	1.17		15.424	1.215		18.563	1.803
																													6.676	1.9		7.444	0.621		9.09	1.094		11.665	1.2		14.258	1.123		15.425	1.184		18.568	1.689
																													6.677	1.551		7.456	1.31		9.092	1.618		11.673	1.161		14.266	1.974		15.437	1.53		18.576	1.313
																													6.683	2.43		7.458	2.173		9.107	1.498		11.692	1.069		14.266	1.863		15.442	1.201		18.576	1.55
																													6.687	1.387		7.465	1.317		9.109	0.951		11.698	0.649		14.268	1.954		15.448	2.39		18.595	2.315
																													6.689	0.935		7.469	1.149		9.111	1.772		11.702	1.641		14.269	1.443		15.45	1.424		18.602	1.63
																													6.693	1.498		7.486	1.922		9.124	1.285		11.717	1.205		14.277	1.308		15.466	1.059		18.604	1.559
																													6.697	1.031		7.49	0.999		9.131	1.008		11.727	1.454		14.279	1.11		15.466	1.573		18.605	1.291
																													6.702	1.519		7.493	0.772		9.131	1.16		11.734	1.167		14.281	1.563		15.467	0.825		18.606	1.191
																													6.702	1.156		7.505	1.219		9.133	1.511		11.736	1.256		14.285	1.375		15.469	0.768		18.607	1.147
																													6.715	1.377		7.515	1.582		9.133	1.866		11.743	1.73		14.299	1.023		15.481	1.134		18.641	1.196
																													6.718	1.31		7.519	2.32		9.148	1.059		11.746	1.221		14.303	1.184		15.483	1.283		18.65	1.203
																													6.726	1.49		7.52	0.782		9.149	1.304		11.755	2.091		14.31	1.998		15.49	1.655		18.652	1.426
																													6.728	1.006		7.522	1.127		9.158	1.425		11.761	1.985		14.318	1.481		15.491	1.023		18.658	1.637
																													6.758	1.332		7.528	1.666		9.163	0.611		11.768	0.81		14.325	1.268		15.497	1.286		18.66	1.204
																													6.758	1.299		7.54	1.343		9.164	1.169		11.768	0.981		14.326	1.329		15.506	1.33		18.663	1.404
																													6.758	1.852		7.543	0.802		9.168	1.114		11.776	1.241		14.326	1.139		15.513	1.239		18.671	2.022
																													6.764	1.872		7.544	2.124		9.177	1.036		11.777	1.792		14.34	1.107		15.513	2.059		18.673	1.248
																													6.765	1.896		7.558	1.125		9.178	1.144		11.78	1.597		14.342	1.444		15.527	1.297		18.676	1.736
																													6.771	1.467		7.558	1.235		9.196	1.302		11.78	1.048		14.356	1.47		15.534	1.147		18.677	1.272
																													6.787	0.943		7.563	1.007		9.201	2.505		11.783	1.661		14.36	0.832		15.535	1.885		18.683	1.252
																													6.792	1.257		7.568	1.044		9.213	0.943		11.785	1.387		14.376	1.311		15.536	1.383		18.687	1.523
																													6.797	1.473		7.572	1.616		9.214	1.247		11.792	1.866		14.379	1.107		15.546	1.505		18.691	0.825
																													6.813	2.311		7.574	1.688		9.216	1.743		11.794	1.762		14.38	1.403		15.546	1.41		18.701	1.415
																													6.816	1.294		7.579	1.068		9.222	1.368		11.806	1.067		14.384	1.359		15.55	1.886		18.719	1.052
																													6.822	1.177		7.605	1.194		9.231	2.012		11.811	1.422		14.391	1.775		15.562	1.107		18.723	1.469
																													6.827	1.072		7.607	1.012		9.235	1.131		11.831	2.091		14.394	2.315		15.567	2.481		18.727	1.978
																													6.839	1.363		7.608	1.352		9.25	1.541		11.834	1.388		14.405	0.939		15.578	2.352		18.736	2.097
																													6.853	1.298		7.611	1.347		9.258	1.096		11.837	1.632		14.41	1.122		15.583	0.741		18.746	1.088
																													6.854	1.602		7.617	1.182		9.265	2.152		11.842	1.264		14.425	1.662		15.592	1.513		18.75	1.2
																													6.862	1.554		7.622	1.392		9.266	3.589		11.858	1.788		14.425	1.95		15.599	0.998		18.764	0.948
																													6.866	1.211		7.632	1.793		9.275	2.706		11.866	0.827		14.427	1.157		15.613	1.22		18.767	1.316
																													6.871	1.03		7.642	1.837		9.276	1.14		11.869	1.472		14.428	1.191		15.618	1.407		18.779	0.937
																													6.893	1.536		7.661	2.609		9.284	1.193		11.875	1.254		14.454	1.401		15.627	0.966		18.78	1.117
																													6.897	1.164		7.676	1.3		9.285	1.311		11.884	0.882		14.485	1.157		15.63	1.304		18.783	1.423
																													6.899	1.489		7.684	1.983		9.293	1.117		11.885	0.642		14.488	2.056		15.632	1.396		18.792	1.009
																													6.901	1.377		7.688	0.742		9.311	0.88		11.89	2.344		14.497	1.356		15.636	1.8		18.804	1.349
																													6.909	1.307		7.692	2.213		9.319	2.297		11.902	0.882		14.504	0.997		15.644	1.235		18.808	1.439
																													6.915	1.046		7.702	1.618		9.32	0.933		11.903	1.504		14.508	1.23		15.646	1.722		18.828	1.598
																													6.923	1.69		7.707	0.998		9.325	1.344		11.91	1.417		14.521	0.884		15.647	1.561		18.829	1.002
																													6.929	1.232		7.71	1.295		9.34	1.338		11.913	1.096		14.529	0.709		15.649	0.712		18.837	1.078
																													6.941	1.018		7.716	0.896		9.341	1.112		11.922	1.211		14.543	1.533		15.658	1.049		18.84	2.875
																													6.944	2.973		7.723	0.883		9.342	1.296		11.928	1.99		14.545	1.529		15.67	2		18.844	1.123
																													6.944	1.532		7.725	0.949		9.347	2.358		11.933	2.161		14.552	1.198		15.678	1.269		18.847	0.615
																													6.945	1.083		7.735	1.304		9.374	1.579		11.942	1.794		14.553	0.939		15.68	1.281		18.848	1.403
																													6.946	1.394		7.743	1.338		9.377	1.807		11.949	1.272		14.556	1.514		15.688	2.966		18.863	1.455
																													6.962	1.397		7.745	1.502		9.384	1.135		11.958	1.445		14.563	0.719		15.705	1.526		18.872	0.949
																													6.964	1.433		7.747	1.542		9.384	0.943		11.968	0.6		14.569	0.672		15.706	1.989		18.872	1.863
																													6.964	2.258		7.748	1.137		9.39	1.066		11.971	1.575		14.576	1.582		15.708	1.301		18.893	1.242
																													6.964	1.37		7.75	1.197		9.4	1.27		11.975	1.001		14.592	1.84		15.71	2.112		18.894	1.458
																													6.97	1.254		7.751	1.487		9.403	0.958		11.976	1.614		14.598	0.839		15.716	1.29		18.91	1.151
																													6.982	1.541		7.753	0.992		9.425	1.426		11.979	1.51		14.601	0.776		15.718	1.875		18.91	1.254
																																7.754	1.017		9.428	1.396		11.984	1.33		14.603	1.303		15.723	1.313		18.923	1.206
																																7.756	1.414		9.438	1.227		11.993	1.817		14.606	1.407		15.739	1.604		18.923	1.229
																																7.76	1.312		9.446	1.132		12	1.789		14.628	0.811		15.748	1.435		18.929	1.466
																																7.764	1.966		9.447	1.465		12.005	1.581		14.63	1.714		15.758	1.293		18.939	2.104
																																7.773	1.749		9.459	1.776		12.021	1.31		14.633	1.465		15.764	1.553		18.955	0.975
																																7.775	1.023		9.461	1.157		12.024	1.119		14.636	1.139		15.765	1.218		18.959	2.164
																																7.783	1.424		9.462	1.351		12.034	1.413		14.638	1.068		15.767	3.265		18.985	1.266
																																7.795	1.132		9.468	1.444		12.057	1.966		14.64	1.067		15.777	1.293		18.988	1.278
																																7.805	1.329		9.486	0.832		12.061	1.472		14.642	0.581		15.779	1.146		18.988	3.017
																																7.807	1.552		9.486	1.437		12.09	1.182		14.643	1.331		15.788	1.378
																																7.812	1.247		9.496	0.941		12.092	1.304		14.647	2.591		15.8	1.451		17.014	1.831
																																7.814	0.991		9.5	1.565		12.098	1.082		14.652	1.205		15.802	2.499		17.021	1.426
																																7.816	1.693		9.504	1.323		12.098	2.387		14.655	1.224		15.807	0.963		17.021	1.704
																																7.821	1.055		9.505	1.786		12.102	0.995		14.673	1.181		15.808	1.002		17.024	1.059
																																7.825	1.836		9.51	0.894		12.109	0.886		14.68	1.331		15.814	2.078		17.024	1.044
																																7.829	1.074		9.512	2.655		12.117	1.524		14.692	1.189		15.819	0.858		17.028	1.453
																																7.83	1.361		9.522	1.48		12.117	1.257		14.698	1.204		15.823	1.491		17.031	1.103
																																7.831	1.688		9.528	1.691		12.119	1.584		14.709	1.711		15.823	1.278		17.038	0.813
																																7.853	1.684		9.544	1.508		12.136	1.413		14.716	0.793		15.826	1.86		17.042	1.374
																																7.867	1.154		9.544	2.88		12.136	1.176		14.722	1.256		15.826	1.351		17.054	1.377
																																7.867	1.276		9.548	2.256		12.15	1.908		14.728	1.663		15.829	1.501		17.056	1.172
																																7.872	1.1		9.552	1.178		12.151	2.383		14.728	1.204		15.834	1.804		17.062	1.517
																																7.873	1.502		9.56	1.037		12.155	1.43		14.739	1.779		15.835	1.135		17.062	1.402
																																7.895	2.89		9.562	1.749		12.157	1.594		14.742	0.866		15.841	1.888		17.071	1.233
																																7.897	2.222		9.565	0.768		12.158	2.467		14.763	1.345		15.867	1.162		17.098	2.085
																																7.898	1.617		9.566	1.13		12.165	1.145		14.763	1.412		15.877	1.802		17.102	1.032
																																7.902	1.189		9.574	1.438		12.204	2.522		14.784	1.161		15.878	1.105		17.105	1.336
																																7.917	1.47		9.574	0.779		12.209	1.284		14.787	1.443		15.88	3.039		17.12	0.752
																																7.942	1.513		9.583	0.726		12.213	1.844		14.79	1.205		15.881	1.148		17.149	1.273
																																7.942	2.659		9.589	0.891		12.22	1.338		14.791	1.512		15.883	1.22		17.156	1.806
																																7.943	1.604		9.593	1.936		12.22	0.923		14.793	1.25		15.886	1.429		17.16	0.683
																																7.958	0.821		9.598	1.867		12.228	1.051		14.796	1.585		15.901	1.228		17.165	0.677
																																7.96	1.603		9.598	1.54		12.237	1.07		14.832	1.662		15.903	1.263		17.166	1.351
																																7.966	1.344		9.598	1.113		12.239	1.564		14.832	1.212		15.907	1.073		17.183	0.83
																																7.968	1.075		9.606	1.048		12.243	0.936		14.832	1.208		15.91	1.354		17.194	1.367
																																7.969	1.282		9.606	1.255		12.281	1.162		14.847	1.556		15.911	0.986		17.197	1.006
																																7.979	1.082		9.609	1.106		12.284	1.966		14.856	1.173		15.916	0.777		17.211	2.677
																																7.982	1.038		9.61	1.438		12.293	1.477		14.863	0.665		15.92	1.195		17.222	1.9
																																7.995	1.047		9.617	0.774		12.307	1.679		14.865	1.377		15.928	1.169		17.226	1
																																7.997	1.873		9.618	1.236		12.311	1.267		14.869	1.626		15.928	1.137		17.229	1.596
																																8.002	1		9.619	0.878		12.322	0.922		14.871	0.726		15.93	1.175		17.251	1.171
																																8.002	1.611		9.622	0.639		12.322	1.278		14.879	0.751		15.934	2.996		17.252	1.233
																																8.003	1.348		9.625	1.617		12.325	1.331		14.88	0.973		15.934	1.416		17.255	1.303
																																8.005	0.677		9.64	0.912		12.326	2.027		14.888	1.588		15.94	1.292		17.255	1.171
																																8.01	2.978		9.645	1.791		12.34	1.626		14.899	1.094		15.947	1.217		17.276	2.085
																																8.023	1.231		9.654	1.252		12.347	1.476		14.902	1.318		15.962	1.111		17.292	1.145
																																8.025	0.893		9.663	1.433		12.348	1.627		14.903	1.148		15.967	0.914		17.298	1.071
																																8.032	1.272		9.664	2.37		12.359	1.158		14.903	2.125		15.978	1.494		17.308	2.133
																																8.036	1.044		9.671	1.328		12.368	1.357		14.903	0.852		15.983	1.979		17.319	1.229
																																8.079	1.141		9.673	2.046		12.377	0.934		14.915	1.658		15.984	1.046		17.325	2.277
																																8.095	1.693		9.677	1.866		12.38	1.143		14.918	1.008		15.998	1.506		17.329	1.613
																																8.097	1.149		9.678	1.285		12.386	0.9		14.918	1.369		16.011	1.632		17.345	2.024
																																8.109	1.302		9.691	1.335		12.39	0.812		14.923	1.524		16.013	1.231		17.35	1.655
																																8.119	1.203		9.692	1.335		12.394	2.397		14.924	0.881		16.016	1.449		17.355	1.244
																																8.121	1.723		9.696	1.164		12.394	2.382		14.929	0.958		16.035	1.08		17.357	1.036
																																8.132	1.438		9.708	1.808		12.407	1.17		14.936	2.356		16.039	1.607		17.363	1.248
																																8.134	1.125		9.709	1.052		12.408	0.965		14.937	1.605		16.049	1.825		17.39	2.814
																																8.137	1.468		9.712	1.129		12.411	1.06		14.94	2.003		16.059	1.118		17.396	0.683
																																8.145	0.879		9.712	1.617		12.413	2.486		14.943	2.025		16.062	1.105		17.4	1.302
																																8.147	0.844		9.718	1.486		12.413	1.386		14.976	1.446		16.064	1.538		17.402	0.896
																																8.154	0.946		9.731	0.734		12.421	1.238		14.982	1.206		16.069	1.198		17.408	0.952
																																8.155	0.958		9.735	1.548		12.423	1.322		14.988	1.501		16.079	1.439		17.412	1.1
																																8.161	1.251		9.744	1.635		12.431	1.821		14.989	0.988		16.082	1.574		17.413	1.057
																																8.167	1.506		9.746	1.014		12.439	2.375					16.085	1.542		17.428	1.276
																																8.169	1.063		9.757	1.279		12.444	1.768		13.006	1.572		16.086	1.19		17.432	1.104
																																8.171	1.023		9.76	1.362		12.453	0.861		13.008	0.943		16.092	1.554		17.439	1.062
																																8.174	1.402		9.763	1.582		12.456	1.348		13.013	1.314		16.098	1.18		17.442	1.075
																																8.179	2.953		9.764	1.408		12.459	1.354		13.016	1.256		16.105	2.227		17.449	1.565
																																8.181	1.098		9.767	1.422		12.462	0.924		13.017	1.049		16.111	1.752		17.45	2.384
																																8.198	1.315		9.795	0.935		12.491	1.125		13.017	1.343		16.112	1.307		17.458	1.411
																																8.205	1.448		9.797	2.029		12.502	1.592		13.022	1.216		16.125	1.578		17.458	1.542
																																8.207	0.669		9.819	1.358		12.547	1.22		13.023	1.815		16.134	1.248		17.46	2.006
																																8.211	1.797		9.835	1.127		12.563	1.127		13.024	1.911		16.139	2.22		17.461	1.9
																																8.217	1.73		9.842	1.216		12.564	1.967		13.035	0.922		16.14	1.008		17.464	1.042
																																8.225	1.701		9.852	1.025		12.565	1.039		13.037	1.492		16.141	1.516		17.472	0.624
																																8.234	1.408		9.864	1.401		12.586	1.12		13.039	1.388		16.149	2.583		17.477	2.645
																																8.242	1.348		9.865	1.32		12.586	1.834		13.048	1.108		16.152	1.274		17.478	1.681
																																8.244	0.975		9.871	1.81		12.609	1.548		13.051	1.196		16.157	1.169		17.478	1.208
																																8.247	0.89		9.872	0.743		12.62	1.255		13.077	1.02		16.172	1.252		17.499	1.184
																																8.257	1.556		9.874	2.392		12.636	2.31		13.083	1.444		16.192	1.978		17.501	1.452
																																8.258	1.345		9.886	1.017		12.64	1.281		13.084	1.141		16.215	1.217		17.505	2.107
																																8.26	1.088		9.887	1.313		12.651	0.976		13.085	0.89		16.217	1.284		17.507	1.187
																																8.266	1.097		9.894	0.931		12.66	1.994		13.093	1.091		16.221	1.321		17.512	1.28
																																8.271	1.801		9.895	2.157		12.66	1.418		13.106	1.232		16.235	1.565		17.515	2.012
																																8.283	0.863		9.902	1.388		12.664	1.297		13.116	1.674		16.248	2.093		17.535	2.134
																																8.29	2.034		9.909	1.326		12.672	1.694		13.135	1.426		16.249	2.242		17.541	0.763
																																8.295	2.284		9.91	0.963		12.701	1.256		13.137	1.259		16.258	2.282		17.549	1.603
																																8.31	1.357		9.916	1.021		12.731	1.352		13.142	1.532		16.259	1.316		17.568	1.36
																																8.315	1.032		9.92	1.502		12.734	1.051		13.143	1.845		16.265	0.975		17.571	1.359
																																8.316	0.892		9.93	1.412		12.751	1.978		13.145	1.828		16.279	1.343		17.589	1.238
																																8.317	1.342		9.938	1.618		12.752	1.387		13.149	1.209		16.286	1.817		17.591	1.386
																																8.337	0.873		9.941	0.774		12.773	1.332		13.164	0.849		16.298	1.397		17.611	0.993
																																8.37	2.748		9.951	1.734		12.775	0.964		13.165	1.352		16.306	1.136		17.617	0.83
																																8.375	1.027		9.96	1.286		12.779	1.43		13.178	1.711		16.306	0.969		17.617	1.2
																																8.377	1.838		9.962	0.881		12.78	1.991		13.179	0.91		16.308	1.223		17.618	0.746
																																8.377	1.125		9.966	2.076		12.787	1.782		13.189	1.355		16.328	1.327		17.638	1.592
																																8.381	1.199		9.972	1.351		12.796	1.545		13.193	1.661		16.329	2.587		17.645	1.492
																																8.394	2.484		9.978	0.891		12.802	1.187		13.2	1.547		16.336	1.283		17.649	1.344
																																8.396	1.704		9.981	1.062		12.825	1.568		13.222	1.617		16.338	1.249		17.652	1.622
																																8.398	2.092		9.984	1.282		12.844	1.47		13.229	1.356		16.349	1.548		17.658	1.914
																																8.408	2.252		9.985	1.137		12.874	1.084		13.229	1.389		16.357	1.025		17.68	1.278
																																8.411	0.838		9.986	2.394		12.886	1.088		13.234	1.3		16.357	1.489		17.703	1.246
																																8.413	2.648		9.989	0.854		12.903	1.556		13.236	1.271		16.365	1.246		17.704	1.234
																																8.415	1.676		10	1.035		12.905	1.203		13.24	1.211		16.371	2.123		17.706	2.464
																																8.415	1.494		10.012	0.938		12.916	1.799		13.253	1.532		16.375	1.012		17.709	1.078
																																8.418	1.202		10.02	1.003		12.917	1.33		13.254	1.32		16.405	1.53		17.712	1.304
																																8.431	0.987		10.025	1.295		12.958	1.042		13.267	1.168		16.406	1.073		17.73	2.137
																																8.432	1.413		10.03	1.736		12.966	1.236		13.268	1.498		16.41	1.301		17.758	1.247
																																8.437	1.236		10.03	1.907		12.99	2.064		13.274	0.993		16.412	1.415		17.778	1.54
																																8.439	1.187		10.035	1.037		12.991	1.294		13.285	1.093		16.419	1.626		17.787	1.062
																																8.445	1.34		10.042	1.041					13.301	1.424		16.42	1.28		17.794	0.947
																																8.45	2.332		10.049	1.278		11.006	1.377		13.309	1.891		16.42	1.588		17.798	1.289
																																8.456	1.209		10.083	1.455		11.011	1.669		13.313	1.083		16.423	1.79		17.816	1.171
																																8.46	1.887		10.093	1.487		11.012	1.393		13.313	1.663		16.436	1.231		17.829	1.654
																																8.466	1.148		10.101	1.39		11.03	1.461		13.319	1.43		16.445	2.026		17.834	1.476
																																8.47	1.734		10.111	0.999		11.032	1.038		13.32	1.618		16.446	1.241		17.835	2.075
																																8.476	2.296		10.112	0.96		11.034	1.083		13.333	1.05		16.448	1.363		17.836	1.119
																																8.499	0.59		10.113	0.799		11.039	0.818		13.336	1.607		16.45	1.048		17.838	1.013
																																8.504	1.125		10.118	1.033		11.042	1.004		13.336	1.25		16.45	1.36		17.843	1.95
																																8.504	0.989		10.123	1.092		11.045	1.198		13.353	1.229		16.453	1.293		17.85	1.186
																																8.506	1.212		10.129	1.542		11.05	1.422		13.36	1.462		16.455	1.279		17.853	1.211
																																8.513	1.22		10.13	1.179		11.056	1.987		13.367	1.027		16.471	1.001		17.854	0.616
																																8.514	1.188		10.131	1.103		11.065	2.467		13.368	1.115		16.475	0.954		17.864	1.87
																																8.516	0.711		10.141	0.822		11.074	2.682		13.369	1.563		16.479	1.452		17.869	1.569
																																8.521	1.293		10.143	3.205		11.075	1.635		13.383	1.904		16.479	1.498		17.881	1.723
																																8.532	1.132		10.146	1.356		11.077	1.36		13.384	1.177		16.48	1.642		17.895	2.438
																																8.533	2.202		10.147	1.033		11.08	1.088		13.395	1.352		16.512	1.083		17.912	1.342
																																8.538	1.051		10.15	0.665		11.081	1.339		13.397	1.573		16.522	2.557		17.914	1.396
																																8.539	1.349		10.153	0.795		11.082	0.912		13.397	0.946		16.524	0.933		17.92	1.476
																																8.54	2.73		10.159	2.031		11.084	1.395		13.4	1.106		16.533	1.059		17.927	0.745
																																8.542	0.675		10.17	0.886		11.088	1.054		13.4	2.216		16.537	1.402		17.936	1.363
																																8.542	1.196		10.177	1.287		11.091	1.258		13.402	1.575		16.541	1.385		17.937	2.145
																																8.546	1.54		10.178	1.255		11.102	0.729		13.403	1.8		16.543	1.277		17.939	1.491
																																8.549	1.598		10.18	1.888		11.132	1.151		13.414	1.183		16.547	1.384		17.94	2.418
																																8.554	1.111		10.186	2.081		11.154	1.125		13.434	1.544		16.549	1.353		17.951	1.373
																																8.565	1.807		10.191	1.066		11.157	1.619		13.439	1.276		16.552	1.264		17.955	1.796
																																8.565	3.447		10.191	1.329		11.161	1.44		13.441	1.543		16.558	1.515		17.958	2.007
																																8.565	1.43		10.198	1.334		11.165	0.806		13.443	1.419		16.558	2.529		17.971	1.094
																																8.565	1.865		10.208	1.613		11.168	1.462		13.467	1.522		16.56	1.204		17.985	1.419
																																8.57	1.6		10.211	1.194		11.169	1.159		13.468	1.487		16.562	1.459		17.99	1.205
																																8.574	1.936		10.217	1.517		11.197	0.727		13.474	1.258		16.564	1.399		18.006	1.543
																																8.575	0.99		10.223	1.568		11.2	1.169		13.475	2.114		16.572	2.951		18.029	2.449
																																8.58	1.532		10.223	1.558		11.209	1.375		13.503	1.233		16.576	1.203		18.032	2.233
																																8.589	1.401		10.237	1.349		11.209	3.739		13.504	1.186		16.584	1.083		18.034	1.774
																																8.6	1.199		10.241	1.006		11.222	0.956		13.505	1.215		16.593	1.743		18.06	0.964
																																8.606	1.173		10.243	2.43		11.227	2.489		13.506	0.99		16.594	1.086		18.077	2.076
																																8.61	1.493		10.247	1		11.232	1.531		13.511	1.568		16.597	1.291		18.083	2.065
																																8.612	2.81		10.249	1.122		11.233	0.911		13.519	1.324		16.602	1.789		18.087	1.225
																																8.614	1.339		10.256	0.832		11.236	1.112		13.524	1.721		16.608	1.436		18.094	2.649
																																8.617	1.233		10.257	1.636		11.24	1.169		13.531	1.397		16.611	0.982		18.098	1.228
																																8.617	1.912		10.26	1.369		11.25	1.42		13.538	2.017		16.613	1.238		18.102	1.75
																																8.62	1.518		10.275	0.748		11.263	1.593		13.54	1.588		16.62	1.61		18.109	0.903
																																8.621	1.233		10.278	1.427		11.271	1.998		13.542	1.451		16.633	1.547		18.114	1.138
																																8.639	1.806		10.282	1.077		11.278	1.31		13.543	1.214		16.663	2.122		18.123	1.836
																																8.643	1.113		10.284	1.916		11.279	1.435		13.549	1.615		16.663	3.089		18.128	1.495
																																8.646	0.97		10.285	1.497		11.28	1.34		13.56	1.22		16.679	1.058		18.176	1.154
																																8.646	1.368		10.29	1.15		11.286	1.083		13.567	1.463		16.69	1.27		18.181	1.375
																																8.652	1.035		10.293	1.492		11.289	1.419		13.569	1.453		16.7	1.391		18.184	1.121
																																8.653	1.675		10.294	1.187		11.301	1.273		13.571	1.04		16.705	1.608		18.191	0.877
																																8.658	2.06		10.297	0.848		11.302	1.292		13.572	1.002		16.706	1.08		18.198	1.103
																																8.668	1.28		10.307	2.486		11.305	1.812		13.573	1.263		16.709	1.31		18.21	1.714
																																8.681	1.26		10.31	1.881		11.307	1.071		13.574	0.91		16.713	1.442		18.211	1.724
																																8.689	0.958		10.312	1.955		11.31	1.147		13.58	1.468		16.714	1.118		18.215	1.184
																																8.691	0.935		10.323	1.592		11.314	1.279		13.612	1.204		16.722	1.544		18.22	1.389
																																8.692	1.794		10.325	0.959		11.323	1.179		13.613	1.832		16.724	1.935		18.221	1.667
																																8.693	1.712		10.326	1.088		11.328	1.357		13.613	1.663		16.73	1.75		18.223	1.591
																																8.697	1.257		10.332	0.834		11.331	1.68		13.615	1.74		16.732	1.798		18.23	1.76
																																8.699	1.099		10.333	0.956		11.334	1.254		13.621	2.765		16.735	1.774		18.248	0.834
																																8.708	1.262		10.34	1.307		11.337	1.344		13.625	2.148		16.736	1.243		18.249	3.359
																																8.71	0.565		10.347	1.267		11.345	1.22		13.635	1.527		16.753	1.156		18.252	1.791
																																8.715	2.441		10.357	1.25		11.35	1.153		13.664	1.087		16.759	1.437		18.279	0.907
																																8.726	1.477		10.358	1.452		11.353	1.365		13.665	1.698		16.759	1.306		18.285	1.468
																																8.736	1.188		10.361	1.948		11.375	1.42		13.668	1.671		16.761	1.549		18.291	1.129
																																8.739	1.317		10.372	1.12		11.375	1.328		13.674	1.054		16.761	1.341		18.31	1.246
																																8.751	1.392		10.386	1.326		11.384	1.228		13.678	1.208		16.779	0.648		18.316	1.986
																																8.762	1.191		10.391	1.962		11.386	1.147		13.687	1.234		16.784	1.231		18.322	1.066
																																8.772	1.152		10.394	1.652		11.388	1.963		13.691	2.191		16.795	0.987		18.336	1.47
																																8.782	0.549		10.395	2.088		11.419	1.445		13.694	1.703		16.802	1.808		18.352	1.687
																																8.787	0.921		10.403	2.076		11.421	1.209		13.7	1.426		16.808	0.842		18.362	1.934
																																8.793	2.718		10.404	1.425		11.422	1.096		13.704	1.194		16.811	2.766		18.374	1.197
																																8.795	1.458		10.407	0.675		11.428	1.201		13.709	1.145		16.814	0.983		18.387	1.32
																																8.801	1.615		10.408	1.54		11.435	1.698		13.714	1.276		16.815	0.845		18.391	1.999
																																8.803	1.373		10.412	0.946		11.439	1.079		13.714	1.145		16.826	1.179		18.397	1.008
																																8.805	1.836		10.427	0.611		11.446	1.162		13.737	1.341		16.826	1.548		18.41	1.578
																																8.807	1.054		10.434	1.869		11.449	1.267		13.74	0.89		16.828	1.775		18.411	1.504
																																8.809	1.127		10.437	0.932		11.455	1.485		13.747	1.475		16.829	1.539		18.418	1.122
																																8.817	1.007		10.439	1.038		11.457	1.252		13.75	1.447		16.835	1.233		18.438	1.38
																																8.819	1.348		10.443	0.927		11.472	1.499		13.751	1.17		16.838	0.756		18.448	1.601
																																8.83	0.909		10.444	1.238		11.473	1.856		13.752	0.737		16.838	1.247		18.456	1.117
																																8.836	1.022		10.472	1.41		11.477	2.275		13.756	1.651		16.84	0.975		18.461	1.555
																																8.839	0.834		10.481	0.91		11.481	0.874		13.764	1.785		16.841	2.314		18.467	1.078
																																8.842	1.464		10.487	1.516		11.481	1.238		13.767	1.246		16.842	2.693		18.472	3.863
																																8.843	1.007		10.49	1.165		11.486	1.728		13.769	1.282		16.848	1.734		18.474	0.951
																																8.848	0.827		10.503	1.134		11.502	1.286		13.77	1.121		16.855	1.048		18.486	1.311
																																8.855	0.636		10.518	1.304		11.505	1.245		13.773	1.23		16.859	1.031		18.495	1.382
																																8.857	1.031		10.523	1.833		11.505	1.081		13.777	1.472		16.862	2.081		18.497	0.747
																																8.861	1.488		10.528	1.419		11.509	1.134		13.783	0.907		16.864	1.404		18.516	1.331
																																8.88	1.873		10.528	1.117		11.509	1.115		13.786	1.361		16.867	0.875		18.529	1.005
																																8.883	1.422		10.536	1.278		11.53	1.176		13.79	0.917		16.87	1.153		18.53	2.104
																																8.905	1.157		10.538	1.276		11.53	1.394		13.805	0.771		16.892	1.038		18.546	1.486
																																8.907	0.666		10.538	1.396		11.535	0.979		13.813	1.283		16.909	2.404		18.551	1.571
																																8.909	2.738		10.546	1.389		11.54	1.367		13.813	1.732		16.914	1.352		18.556	1.124
																																8.91	1.106		10.555	1.298		11.559	1.202		13.816	1.588		16.92	1.298		18.557	1.317
																																8.919	0.927		10.575	1.17		11.566	1.762		13.826	1.421		16.922	0.721		18.56	2.538
																																8.931	1.677		10.588	1.096		11.576	1.848		13.85	2.333		16.925	1.25		18.561	1.495
																																8.94	1.489		10.615	1.703		11.579	1.366		13.851	1.246		16.948	1.294		18.578	0.892
																																8.945	0.915		10.631	1.511		11.58	1.519		13.88	1.521		16.968	1.426		18.578	0.916
																																8.945	1.043		10.636	1.145		11.581	1.083		13.889	1.035		16.97	1.052		18.579	1.291
																																8.948	1.695		10.636	2.094		11.586	1.314		13.905	1.379		16.974	1.413		18.616	0.842
																																8.956	1.157		10.638	1.282		11.589	0.798		13.932	0.641		16.991	0.958		18.62	1.215
																																8.958	1.821		10.639	1.608		11.597	1.25		13.938	1.47		16.991	1.457		18.621	1.814
																																8.977	1.469		10.642	2.744		11.597	1.632		13.946	1.399		16.995	0.911		18.623	1.726
																																8.98	1.419		10.643	0.925		11.607	2.109		13.95	1.355					18.637	1.316
																																8.982	1.633		10.644	1.24		11.624	1.354		13.95	1.166		15	1.102		18.656	1.655
																																8.984	1.214		10.646	1.414		11.632	1.092		13.956	1.475		15.008	2.265		18.656	1.448
																																8.989	1.478		10.646	0.671		11.632	2.127		13.958	1.482		15.017	1.548		18.663	1.275
																																8.994	1.918		10.648	1.105		11.64	1.683		13.96	0.964		15.021	0.82		18.674	1.389
																																8.994	3.159		10.65	2.138		11.657	1.182		13.962	1.013		15.021	1.349		18.692	0.852
																																			10.663	0.772		11.662	2.019		13.967	1.37		15.027	1.634		18.712	1.025
																																7.008	1.077		10.667	0.642		11.666	1.366		13.971	1.98		15.04	0.69		18.712	1.084
																																7.019	1.383		10.674	1.069		11.685	1.615		13.971	1.344		15.044	0.961		18.717	1.171
																																7.02	1.102		10.687	1.287		11.686	1.288		13.979	3.165		15.051	1.423		18.724	1.992
																																7.03	1.59		10.703	1.143		11.707	1.106		13.994	1.286		15.06	1.141		18.735	1.658
																																7.048	1.434		10.719	1.843		11.709	1.345		13.997	1.087		15.074	2.302		18.743	1.028
																																7.052	1.484		10.725	1.18		11.718	0.94		14.009	1.957		15.08	1.334		18.744	0.88
																																7.065	1.201		10.734	1.714		11.727	1.103		14.014	1.399		15.094	1.628		18.765	1.139
																																7.068	1.149		10.736	1.145		11.727	1.473		14.018	0.988		15.095	1.047		18.784	1.31
																																7.073	1.571		10.755	1.655		11.74	1.344		14.027	1.453		15.098	0.839		18.787	1.368
																																7.078	1.133		10.756	1.473		11.746	1.639		14.03	1.274		15.118	1.963		18.8	1.589
																																7.081	1.772		10.757	0.998		11.766	1.272		14.03	1.02		15.128	0.838		18.801	1.215
																																7.084	1.763		10.76	1.709		11.791	1.403		14.035	1.372		15.193	2.305		18.814	1.195
																																7.098	1.592		10.764	1.566		11.792	1.104		14.037	2.182		15.208	2.109		18.84	1.277
																																7.099	1.874		10.769	0.819		11.798	1.731		14.038	2.151		15.212	1.369		18.844	1.149
																																7.11	1.267		10.793	0.983		11.799	1.96		14.047	1.276		15.218	1.015		18.854	0.678
																																7.135	0.973		10.801	1.048		11.8	1.039		14.047	1.29		15.223	1.26		18.869	1.205
																																7.144	1.401		10.814	1.624		11.8	1.16		14.059	1.265		15.226	1.409		18.886	0.864
																																7.145	2.553		10.843	1.645		11.801	1.444		14.059	0.802		15.228	1.45		18.891	1.469
																																7.157	1.186		10.845	2.479		11.802	1.584		14.076	1.34		15.23	1.548		18.907	0.954
																																7.157	1.369		10.855	1.437		11.807	1.658		14.077	1.211		15.235	1.115		18.928	1.173
																																7.159	1.551		10.856	1.067		11.807	1.632		14.082	1.661		15.246	1.155		18.939	1.224
																																7.16	1.061		10.86	1.223		11.808	0.613		14.091	1.04		15.251	1.597		18.94	1.427
																																7.166	1.008		10.861	1.376		11.808	1.388		14.095	1.397		15.254	1.081		18.943	1.463
																																7.188	1.262		10.861	2.314		11.81	1.59		14.099	1.02		15.263	0.841		18.945	1.258
																																7.192	1.37		10.862	1.061		11.812	2.54		14.102	1.739		15.272	1.545		18.946	1.28
																																7.197	1.078		10.868	0.923		11.819	1.39		14.106	0.949		15.273	1.374		18.951	0.744
																																7.205	1.388		10.892	0.898		11.82	1.093		14.109	1.396		15.274	1.222		18.959	1.089
																																7.223	1.196		10.914	1.582		11.82	1.828		14.113	1.612		15.275	1.054		18.964	1.436
																																7.227	1.349		10.916	2.263		11.825	1.22		14.113	2.202		15.282	1.353		18.965	1.185
																																7.227	1.374		10.918	1.286		11.836	1.091		14.114	1.482		15.286	1.176		18.97	1.17
																																7.236	1.201		10.921	1.163		11.854	1.875		14.122	1.161		15.289	1.729		18.979	1.44
																																7.242	1.398		10.941	0.932		11.855	1.473		14.134	1.494		15.291	1.129		18.979	1.243
																																7.246	1.587		10.95	1.948		11.863	1.206		14.136	0.935		15.294	1.74		18.986	1.174
																																7.246	2.865		10.952	1.011		11.864	2.98		14.15	1.285		15.305	1.344
																																7.248	1.219		10.957	1.4		11.87	1.239		14.154	1.929		15.307	1.887
																																7.25	1.527		10.981	2.021		11.874	1.272		14.165	1.37		15.309	2.381
																																7.251	1.408		10.989	1.393		11.887	1.458		14.174	1.107		15.317	0.895
																																7.267	1.178		10.995	0.856		11.903	0.755		14.183	1.326		15.319	1.553
																																7.273	1.738		10.997	1.102		11.907	1.551		14.19	1.06		15.326	1.281
																																7.28	1.035					11.917	0.835		14.199	1.824		15.335	1.428
																																7.282	2.689		9	1.32		11.923	1.358		14.201	2.231		15.344	1.262
																																7.29	1.349		9.008	1.536		11.925	0.73		14.205	0.868		15.356	1.202
																																7.292	1.2		9.011	1.594		11.927	1.292		14.206	0.929		15.365	1.334
																																7.306	0.871		9.027	0.848		11.933	1.701		14.213	1.25		15.371	1.463
																																7.308	1.388		9.028	1.537		11.934	0.996		14.217	2.071		15.391	1.036
																																7.315	1.395		9.034	1.387		11.939	0.909		14.222	1.252		15.392	1.698
																																7.339	1.467		9.042	1.097		11.943	2.012		14.237	1.515		15.395	1.003
																																7.349	1.521		9.055	0.61		11.946	1.452		14.239	2		15.398	1.492
																																7.364	1.677		9.058	1.043		11.947	0.711		14.249	1.468		15.401	1.857
																																7.367	1.851		9.06	1.368		11.974	2.11		14.251	1.09		15.41	2.371
																																7.369	1.475		9.076	2.783		11.978	1.036		14.257	0.891		15.41	1.009
																																7.374	1.692		9.077	1.067		11.984	1.07		14.257	1.124		15.413	0.758
																																7.374	1.616		9.081	1.141		11.985	1.665		14.257	1.748		15.417	1.498
																																7.38	2.239		9.089	1.069		11.989	1.225		14.264	2.586		15.42	0.699
																																7.381	1.836		9.089	1.399		11.992	0.816		14.264	1.468		15.429	1.51
																																7.382	1.15		9.096	2.275		11.994	1.53		14.266	1.086		15.441	1.465
																																7.388	0.877		9.104	1.464		12.011	1.38		14.272	0.839		15.443	1.066
																																7.392	1.291		9.107	2.177		12.017	1.242		14.272	0.694		15.467	1.082
																																7.394	0.873		9.107	1.239		12.032	1.597		14.285	1.149		15.471	2.217
																																7.404	1.864		9.108	1.325		12.043	1.605		14.288	1.32		15.474	1.958
																																7.407	1.35		9.111	0.803		12.043	1.5		14.29	1.154		15.48	1.607
																																7.408	1.429		9.123	1.3		12.069	1.312		14.292	1.431		15.502	1.387
																																7.41	1.637		9.124	1.561		12.072	1.128		14.295	1.117		15.505	0.716
																																7.411	1.427		9.139	1.11		12.074	1.675		14.296	2.097		15.511	0.747
																																7.411	1.42		9.14	1.131		12.085	1.038		14.308	1.478		15.514	0.97
																																7.412	1.155		9.149	2.678		12.085	1.714		14.329	0.785		15.529	1.77
																																7.413	1.327		9.154	1.108		12.093	1.161		14.342	1.391		15.53	1.528
																																7.415	1.17		9.162	1.317		12.109	1.371		14.344	1.559		15.532	0.979
																																7.422	2.807		9.172	1.56		12.111	1.39		14.347	1.109		15.548	1.114
																																7.446	1.451		9.173	1.092		12.115	1.526		14.349	3.431		15.551	1.922
																																7.448	1.57		9.18	1.574		12.116	1.213		14.356	1.62		15.553	1.857
																																7.465	1.969		9.191	1.247		12.121	1.45		14.369	1.206		15.555	2.17
																																7.481	1.129		9.201	1.259		12.127	1.179		14.372	0.7		15.562	1.332
																																7.497	1.639		9.201	1.609		12.141	1.501		14.381	0.886		15.567	1.744
																																7.499	1.17		9.206	1.421		12.146	1.956		14.382	1.156		15.57	2.097
																																7.503	1.593		9.208	1.13		12.156	1.852		14.4	1.826		15.58	1.629
																																7.515	2.006		9.21	1.229		12.158	1.028		14.406	1.246		15.59	1.089
																																7.52	1.221		9.21	1.167		12.158	2.08		14.412	1.426		15.597	1.474
																																7.521	1.026		9.214	1.525		12.173	1.408		14.412	1.422		15.603	1.275
																																7.526	1.269		9.218	0.891		12.179	1.584		14.414	1.793		15.63	1.222
																																7.531	1.367		9.22	0.938		12.193	1.423		14.421	0.985		15.633	1.645
																																7.532	1.318		9.222	2.233		12.194	1.633		14.424	1.185		15.643	1.338
																																7.533	1.703		9.222	1.201		12.204	1.559		14.425	1.323		15.644	1.136
																																7.533	1.168		9.225	1.359		12.206	1.503		14.426	0.769		15.646	1.771
																																7.536	0.76		9.233	1.616		12.21	1.801		14.43	0.899		15.649	1.314
																																7.536	2.461		9.237	1.515		12.213	1.239		14.44	1.911		15.687	1.562
																																7.537	1.422		9.241	1.81		12.218	1.75		14.471	0.927		15.698	0.888
																																7.539	1.616		9.243	1.027		12.232	1.214		14.474	1.202		15.703	0.734
																																7.559	1.103		9.275	2.224		12.234	1.122		14.484	0.866		15.707	1.495
																																7.567	1.407		9.275	1.464		12.254	1.493		14.491	1.495		15.717	1.189
																																7.569	1.857		9.284	1.605		12.257	1.368		14.503	1.719		15.717	0.846
																																7.577	1.994		9.294	1.3		12.264	0.912		14.508	1.138		15.73	1.766
																																7.586	1.054		9.298	2.451		12.265	1.442		14.51	0.589		15.779	1.136
																																7.59	1.256		9.312	0.951		12.265	0.623		14.526	1.649		15.781	1.203
																																7.594	1.664		9.315	0.947		12.266	1.623		14.539	1.163		15.795	1.033
																																7.597	1.35		9.316	1.451		12.274	2.493		14.543	1.065		15.797	0.886
																																7.602	1.129		9.316	1.194		12.275	1.282		14.546	0.829		15.808	1.148
																																7.606	1.9		9.321	1.21		12.281	0.944		14.548	1.614		15.809	0.714
																																7.608	1.577		9.326	0.848		12.284	1.796		14.55	1.415		15.811	1.326
																																7.612	1.304		9.326	2.125		12.288	2.777		14.55	2.437		15.814	1.311
																																7.631	1.75		9.331	1.649		12.296	1.257		14.552	1.965		15.815	1.342
																																7.639	2.123		9.341	0.894		12.303	1.424		14.557	1.063		15.822	1.322
																																7.661	1.238		9.344	1.461		12.317	1.187		14.563	1.878		15.823	1.204
																																7.662	1.418		9.355	1.663		12.321	0.709		14.563	0.819		15.827	1.012
																																7.668	1.14		9.358	1.809		12.337	1.17		14.565	0.778		15.834	2.075
																																7.674	2.339		9.365	0.926		12.343	2.186		14.566	1.16		15.867	1.016
																																7.678	1.186		9.365	1.342		12.351	2.403		14.576	1.163		15.873	1.168
																																7.701	1.648		9.373	1.364		12.352	1.1		14.577	0.928		15.876	1.597
																																7.711	1.462		9.379	1.283		12.354	1.604		14.584	1.611		15.88	0.82
																																7.716	1.602		9.385	1.147		12.355	1.238		14.585	3.383		15.881	1.966
																																7.718	1.291		9.386	1.661		12.357	1.663		14.595	1.128		15.893	0.747
																																7.724	2.015		9.394	1.67		12.376	1.28		14.598	1.688		15.894	2.563
																																7.729	1.838		9.401	2.835		12.385	1.323		14.603	2.269		15.907	1.354
																																7.739	2.026		9.404	0.793		12.387	1.208		14.616	0.852		15.91	1.749
																																7.755	1.969		9.407	1.424		12.388	2.178		14.618	1.178		15.913	0.967
																																7.765	1.403		9.414	1.544		12.39	1.533		14.623	1.631		15.921	2.157
																																7.766	2.091		9.419	2.926		12.391	1.223		14.628	0.838		15.924	0.843
																																7.777	1.235		9.433	1.306		12.415	1.006		14.628	1.849		15.925	0.843
																																7.777	1.175		9.439	1.407		12.423	1.123		14.645	1.305		15.938	1.066
																																7.778	1.273		9.445	1.748		12.425	1.182		14.646	0.751		15.942	1.306
																																7.781	1.534		9.45	1.038		12.428	1.704		14.647	1.035		15.946	1.373
																																7.782	2.485		9.462	1.134		12.434	1.277		14.649	1.107		15.952	1.625
																																7.795	1.337		9.463	2.055		12.443	1.591		14.652	1.326		15.96	1.128
																																7.796	1.175		9.465	1.436		12.456	1.269		14.653	1.881		15.96	1.182
																																7.803	1.71		9.468	1.435		12.458	1.187		14.659	1.387		15.965	1.104
																																7.828	1.161		9.476	0.802		12.461	1.362		14.664	1.136		15.968	1.017
																																7.835	2.491		9.487	1.529		12.471	1.436		14.664	0.903		15.969	0.82
																																7.84	1.698		9.498	1.306		12.475	1.019		14.668	1.767		15.973	0.768
																																7.847	1.71		9.527	0.735		12.483	1.514		14.672	1.422		15.983	1.305
																																7.849	1.25		9.532	1.172		12.486	1.212		14.673	1.324		15.986	1.91
																																7.85	2.049		9.533	0.63		12.486	1.92		14.682	0.758		15.986	1.676
																																7.852	1.368		9.536	1.312		12.486	1.27		14.691	1.54		16.001	0.964
																																7.853	1.257		9.544	2.797		12.494	2.794		14.692	1.373		16.004	1.038
																																7.859	1.51		9.55	1.303		12.5	0.659		14.711	1.428		16.004	2.185
																																7.869	1.366		9.554	2.007		12.507	1.316		14.743	1.531		16.009	1.122
																																7.87	1.314		9.556	0.744		12.509	1.41		14.746	1.344		16.025	1.088
																																7.903	1.245		9.569	0.969		12.525	1.189		14.749	1.353		16.031	1.27
																																7.908	1.036		9.577	1.421		12.525	1.104		14.758	1.642		16.034	1.934
																																7.908	2.9		9.58	1.142		12.539	1.189		14.773	1.069		16.04	1.971
																																7.908	1.573		9.581	1.105		12.555	1.314		14.774	0.95		16.041	1.491
																																7.911	0.974		9.582	1.032		12.555	2.031		14.784	1.265		16.045	1.135
																																7.915	1.476		9.584	1.034		12.555	1.345		14.787	1.338		16.045	0.872
																																7.926	1.373		9.584	1.418		12.579	0.757		14.79	1.1		16.052	1.333
																																7.935	1.575		9.588	1.353		12.58	1.293		14.79	1.405		16.07	1.592
																																7.94	1.456		9.594	1.446		12.581	1.351		14.793	1.259		16.075	0.762
																																7.94	1.505		9.595	1.85		12.582	1.089		14.793	1.692		16.079	1.429
																																7.956	3.161		9.597	1.108		12.583	1.091		14.795	1.074		16.08	1.139
																																7.967	1.142		9.599	1.541		12.59	1.292		14.795	1.341		16.09	1.614
																																7.969	2.595		9.599	1.312		12.59	2.154		14.8	1.347		16.093	1.974
																																7.971	1.624		9.6	1.476		12.592	1.215		14.803	1.237		16.096	1.361
																																7.978	1.425		9.602	3.565		12.593	1.384		14.811	0.955		16.101	1.344
																																7.981	3.006		9.611	1.681		12.6	1.499		14.816	0.851		16.103	1.002
																																7.995	1.982		9.618	1.384		12.629	0.812		14.819	1.479		16.106	0.787
																																8.008	1.469		9.619	1.972		12.636	1.511		14.824	1.078		16.108	1.345
																																8.009	1.39		9.621	2.576		12.64	1.205		14.832	1.56		16.109	1.353
																																8.009	1.512		9.628	1.334		12.64	0.706		14.834	1.446		16.156	1.184
																																8.019	1.372		9.639	1.537		12.642	1.445		14.839	1.41		16.157	1.313
																																8.023	1.288		9.642	1.177		12.655	1.309		14.844	1.212		16.159	1.282
																																8.036	1.573		9.653	1.541		12.656	1.344		14.861	1.126		16.176	0.921
																																8.041	1.062		9.657	1.204		12.66	1.443		14.862	1.393		16.183	1.508
																																8.043	1.031		9.657	2.635		12.666	1.286		14.881	1.318		16.186	1.615
																																8.044	0.933		9.661	1.202		12.67	2.704		14.881	1.721		16.193	1.309
																																8.052	1.559		9.666	2.446		12.674	1.426		14.883	1.138		16.195	1.13
																																8.064	1.443		9.67	1.417		12.678	1.407		14.884	1.272		16.201	0.903
																																8.068	1.469		9.671	1.304		12.678	0.93		14.902	1.11		16.206	1.414
																																8.081	0.958		9.673	1.306		12.68	1.736		14.91	1.28		16.21	0.698
																																8.082	1.099		9.673	1.77		12.684	1.179		14.92	1.409		16.217	1.33
																																8.092	1.429		9.674	1.353		12.686	1.189		14.926	0.878		16.219	1.138
																																8.099	1.823		9.676	1.214		12.698	1.383		14.935	1.36		16.23	0.964
																																8.101	1.189		9.679	1.455		12.701	2.1		14.938	1.268		16.247	2.232
																																8.141	1.639		9.68	1.111		12.702	1.241		14.949	1.19		16.247	1.387
																																8.148	1.065		9.69	3.235		12.711	0.719		14.952	1.053		16.251	1.678
																																8.153	1.162		9.703	0.928		12.712	1.251		14.962	1.882		16.253	1.158
																																8.163	1.444		9.706	1.54		12.723	0.83		14.964	1.053		16.259	0.928
																																8.17	0.95		9.716	2.116		12.723	1.883		14.965	2.179		16.26	2.582
																																8.171	1.136		9.732	1.877		12.728	1.36		14.966	1.207		16.269	0.981
																																8.171	1.556		9.736	1.073		12.734	1.349		14.97	1.296		16.294	1.116
																																8.175	1.414		9.739	1.405		12.737	1.356		14.977	1.585		16.297	0.782
																																8.178	1.41		9.745	1.085		12.743	1.103		14.989	1.157		16.298	1.963
																																8.196	1.498		9.751	0.964		12.75	1.347		14.992	2.026		16.305	1.443
																																8.202	1.706		9.763	1.124		12.755	2.282					16.315	2.432
																																8.204	1.158		9.78	1.19		12.762	1.42		13.002	1.173		16.317	2.254
																																8.205	1.091		9.784	0.931		12.765	2.736		13.004	1.394		16.32	1.058
																																8.222	1.61		9.785	0.964		12.766	2.027		13.004	2.002		16.329	1.847
																																8.229	1.304		9.797	2.024		12.767	2.277		13.011	1.542		16.332	0.917
																																8.23	1.305		9.8	1.875		12.771	1.86		13.026	1.237		16.334	1.706
																																8.234	1.618		9.801	1.125		12.771	1.147		13.034	1.073		16.334	1.078
																																8.235	1.206		9.822	2.009		12.789	1.282		13.04	1.272		16.336	1.574
																																8.235	1.099		9.823	1.319		12.79	1.461		13.043	2.571		16.336	1.433
																																8.242	1.182		9.826	1.669		12.796	1.424		13.044	0.982		16.339	0.724
																																8.245	1.138		9.835	1.617		12.797	1.279		13.044	1.371		16.344	1.282
																																8.258	2.017		9.839	1.263		12.798	1.807		13.052	0.981		16.351	1.358
																																8.262	1.511		9.841	1.211		12.812	3.65		13.083	1.019		16.37	1.673
																																8.264	1.086		9.848	1.14		12.82	1.467		13.085	1.254		16.377	1.752
																																8.282	1.825		9.85	1.586		12.826	1.191		13.105	1.355		16.378	1.433
																																8.287	1.685		9.852	2.438		12.83	0.948		13.112	1.579		16.379	2.098
																																8.291	1.297		9.859	0.764		12.839	1.311		13.115	1.155		16.38	1.339
																																8.309	0.53		9.873	1.521		12.841	1.163		13.123	1.234		16.385	1.417
																																8.313	1.271		9.884	1.148		12.856	2.324		13.13	0.916		16.396	0.98
																																8.315	0.878		9.884	1.241		12.86	1.442		13.141	1.29		16.427	1.315
																																8.317	1.293		9.888	1.595		12.867	2.725		13.153	1.225		16.43	0.689
																																8.324	1.966		9.893	1.894		12.871	1.459		13.164	1.258		16.434	2.199
																																8.325	1.292		9.895	0.804		12.875	1.459		13.169	1.069		16.443	1.276
																																8.335	1.566		9.897	1.108		12.88	1.544		13.172	2.114		16.475	1.923
																																8.34	1.311		9.906	0.939		12.885	1.076		13.173	1.266		16.476	1.135
																																8.343	0.824		9.914	1.595		12.886	1.312		13.184	1.949		16.481	1.619
																																8.348	2.188		9.915	1.289		12.887	1.226		13.185	1.958		16.488	1.002
																																8.354	1.394		9.921	1.317		12.893	1.33		13.189	1.482		16.493	1.62
																																8.365	1.287		9.93	1.858		12.905	1.44		13.193	1.5		16.501	1.391
																																8.366	0.899		9.931	1.25		12.911	1.207		13.215	0.601		16.504	1.234
																																8.367	1.217		9.931	1.252		12.936	1.508		13.219	1.147		16.504	1.237
																																8.368	1.493		9.932	1.406		12.954	1.696		13.239	0.961		16.504	0.995
																																8.376	1.565		9.938	1.972		12.962	1.395		13.252	0.912		16.508	1.151
																																8.377	1.306		9.939	1.432		12.963	1.093		13.255	0.871		16.52	1.168
																																8.396	1.101		9.94	2.13		12.975	1.185		13.256	1.136		16.522	1.384
																																8.397	1.923		9.941	0.98		12.979	2.39		13.257	1.715		16.526	0.885
																																8.401	1.96		9.945	1.911		12.985	1.5		13.262	1.055		16.53	1.546
																																8.402	2.366		9.954	1.197		12.998	0.84		13.273	0.678		16.532	0.99
																																8.407	1.563		9.958	1.888					13.303	1.663		16.541	1.071
																																8.412	1.451		9.97	2.443		11.007	1.818		13.304	1.14		16.541	0.871
																																8.413	2.897		9.971	1.261		11.01	1.197		13.312	1.261		16.551	1.811
																																8.42	1.153		9.98	1.649		11.016	1.235		13.32	0.827		16.56	1.283
																																8.425	1.173		9.99	1.103		11.022	1.055		13.32	0.673		16.561	1.157
																																8.438	1.132		9.994	1.047		11.026	1.273		13.321	1.69		16.57	1.264
																																8.439	0.795		9.997	0.616		11.029	1.467		13.322	1.525		16.571	0.653
																																8.441	1.332		9.998	1.484		11.049	1.334		13.323	1.503		16.572	1.44
																																8.448	1.47		10.018	1.606		11.052	0.592		13.329	1.407		16.577	2.723
																																8.448	3.127		10.026	0.932		11.055	1.547		13.332	1.958		16.578	2.203
																																8.451	1.235		10.03	1.555		11.058	1.612		13.342	1.513		16.58	1.349
																																8.453	1.625		10.031	1.438		11.065	1.315		13.362	1.245		16.582	1.309
																																8.459	1.681		10.04	1.407		11.079	1.42		13.374	1.522		16.582	1.449
																																8.459	0.671		10.057	1.343		11.08	1.251		13.375	1.331		16.586	1.272
																																8.46	1.422		10.06	1.272		11.09	1.48		13.377	0.741		16.592	1.028
																																8.463	1.716		10.062	1.256		11.094	1.956		13.378	0.749		16.593	1.492
																																8.463	1.599		10.066	1.248		11.098	1.952		13.395	2.173		16.596	1.086
																																8.466	1.833		10.072	1.613		11.101	1.932		13.395	0.974		16.596	1.521
																																8.475	1.194		10.072	1.409		11.109	1.479		13.401	0.874		16.604	1.381
																																8.487	1.393		10.073	1.302		11.118	1.282		13.408	2.073		16.612	1.64
																																8.518	1.233		10.092	1.545		11.129	1.023		13.42	1.144		16.625	1.308
																																8.528	1.635		10.097	1.217		11.136	1.769		13.425	1.794		16.638	2.71
																																8.537	1.164		10.104	1.432		11.148	1.734		13.425	1.371		16.672	1.744
																																8.538	0.831		10.105	1.695		11.151	1.406		13.428	2.086		16.673	1.384
																																8.54	0.61		10.106	0.791		11.179	1.585		13.431	1.042		16.679	0.676
																																8.541	1.483		10.116	1.338		11.182	1.131		13.436	1.376		16.68	1.321
																																8.541	2.552		10.126	1.919		11.184	1.848		13.448	1.374		16.688	2.016
																																8.544	1.755		10.16	1.561		11.193	1.303		13.453	1.577		16.689	1.841
																																8.544	1.792		10.161	1.583		11.195	1.269		13.454	0.819		16.694	1.059
																																8.544	1.247		10.168	1.284		11.206	1.426		13.457	1.358		16.694	1.059
																																8.545	1.156		10.169	2.338		11.208	1.377		13.459	1.595		16.7	1.143
																																8.545	1.289		10.178	0.878		11.219	1.234		13.48	1.111		16.702	3.128
																																8.547	1.227		10.186	1.424		11.24	1.682		13.497	1.35		16.706	1.124
																																8.557	1.68		10.191	1.672		11.25	1.699		13.504	1.18		16.732	2.569
																																8.574	0.839		10.193	1.028		11.251	1.552		13.512	1.261		16.741	1.206
																																8.583	1.1		10.2	1.521		11.251	1.666		13.514	2.001		16.743	1.966
																																8.585	0.994		10.202	1.012		11.257	2.467		13.527	1.65		16.751	0.837
																																8.586	1.699		10.204	1.348		11.26	0.859		13.535	1.06		16.752	1.482
																																8.592	1.081		10.212	1.605		11.265	1.794		13.541	1.424		16.754	0.961
																																8.595	1.554		10.22	1.287		11.27	2.198		13.558	1.488		16.761	1.019
																																8.595	1.339		10.225	0.977		11.281	1.137		13.559	1.347		16.764	1.025
																																8.614	2.501		10.227	0.844		11.282	4.619		13.562	0.857		16.767	1.355
																																8.614	1.971		10.228	0.9		11.283	1.463		13.563	1.755		16.768	0.732
																																8.616	1.803		10.259	1.365		11.291	1.245		13.564	1.201		16.771	1.091
																																8.616	1.524		10.262	1.182		11.301	1.208		13.567	1.304		16.773	0.999
																																8.617	1.193		10.269	1.421		11.303	1.423		13.581	1.328		16.777	1.273
																																8.62	1.307		10.287	1.377		11.319	1.229		13.583	1.508		16.778	1.209
																																8.628	1.897		10.29	1.729		11.323	1.323		13.591	1.224		16.783	1.304
																																8.632	1.01		10.296	1.055		11.325	3.545		13.603	1.023		16.784	1.003
																																8.632	1.862		10.299	1.18		11.326	0.91		13.618	0.995		16.796	2.123
																																8.633	1.622		10.304	1.043		11.337	1.507		13.631	1.986		16.802	1.282
																																8.642	1.836		10.305	1.239		11.346	2.12		13.639	1.695		16.802	1.746
																																8.642	1.493		10.326	1.161		11.349	1.319		13.644	1.545		16.807	1.36
																																8.673	1.999		10.341	1.897		11.354	1.304		13.648	1.156		16.807	1.418
																																8.681	1.217		10.341	1.932		11.356	1.236		13.662	0.971		16.809	1.439
																																8.684	0.877		10.344	1.752		11.361	1.774		13.667	1.007		16.818	1.411
																																8.685	1.122		10.357	1.935		11.365	0.959		13.668	1.486		16.82	1.008
																																8.691	2.127		10.373	1.136		11.369	1.052		13.674	1.057		16.82	1.437
																																8.694	1.756		10.375	1.602		11.376	1.428		13.675	1.392		16.832	1.238
																																8.696	2.187		10.38	1.074		11.381	0.988		13.677	1.476		16.838	1.09
																																8.702	1.343		10.387	1.908		11.385	2.489		13.678	1.939		16.839	1.151
																																8.705	0.959		10.392	1.527		11.388	1.254		13.678	1.13		16.855	1.497
																																8.714	1.247		10.403	1.093		11.389	1.272		13.68	1.381		16.862	1.268
																																8.716	2.464		10.403	2.112		11.391	1.212		13.681	1.168		16.866	1.202
																																8.725	1.017		10.415	1.116		11.395	1.343		13.683	1.033		16.875	1.789
																																8.734	1.27		10.417	2.297		11.397	1.583		13.683	1.217		16.879	1.704
																																8.736	1.114		10.419	1.628		11.4	2.07		13.689	0.868		16.897	1.603
																																8.742	1.665		10.423	1.48		11.404	1.59		13.702	1.464		16.904	1.351
																																8.763	1.867		10.431	1.561		11.405	1.361		13.704	1.393		16.905	1.426
																																8.774	2.738		10.434	1.777		11.41	1.207		13.709	1.131		16.931	1.019
																																8.775	1.07		10.438	1.159		11.427	1.402		13.724	1.358		16.933	1.618
																																8.781	1.154		10.451	0.75		11.446	1.565		13.735	1.467		16.936	0.987
																																8.784	2.268		10.454	1.39		11.45	1.148		13.75	0.982		16.936	1.65
																																8.796	1.675		10.461	0.845		11.459	1.029		13.75	1.389		16.958	1.449
																																8.804	1.201		10.461	1.275		11.46	0.995		13.758	1.019		16.962	2.348
																																8.81	1.695		10.478	1.365		11.468	1.141		13.76	2.397		16.969	1.54
																																8.815	0.857		10.482	1.548		11.473	1.313		13.765	1.488		16.973	1.191
																																8.826	1.573		10.487	1.065		11.474	1.269		13.767	1.045		16.975	0.988
																																8.835	1.117		10.502	1.486		11.475	1.544		13.77	1.035		16.981	1.452
																																8.835	1.437		10.504	1.76		11.497	1.219		13.77	2.121		16.983	2.036
																																8.843	1.147		10.505	0.847		11.504	1.579		13.779	0.58		16.993	1.436
																																8.853	1.245		10.509	1.299		11.507	1.745		13.788	1.806		16.993	1.307
																																8.854	2.157		10.512	1.493		11.511	1.289		13.789	1.393
																																8.879	2.412		10.512	1.409		11.512	2.111		13.798	1.326
																																8.88	1.208		10.514	0.993		11.523	1.784		13.802	1.183
																																8.881	1.584		10.518	1.511		11.523	0.97		13.812	1.645
																																8.887	1.254		10.529	1.544		11.526	1.501		13.816	2.418
																																8.89	1.386		10.531	1.515		11.534	1.259		13.825	1.221
																																8.893	1.435		10.534	1.278		11.542	1.287		13.844	2.251
																																8.897	1.651		10.535	1.023		11.548	1.524		13.853	1.452
																																8.905	1.513		10.538	1.22		11.561	1.598		13.854	1.46
																																8.908	1.102		10.544	1.479		11.563	1.395		13.855	1.578
																																8.91	1.237		10.556	1.479		11.567	1.245		13.862	2.763
																																8.916	2.157		10.564	1.529		11.573	1.782		13.864	1.408
																																8.917	0.908		10.574	0.918		11.573	1.596		13.866	1.618
																																8.925	0.911		10.576	0.972		11.587	1.186		13.867	2.427
																																8.931	2.39		10.582	1.543		11.597	1.683		13.868	2.519
																																8.931	0.984		10.583	1.004		11.6	1.388		13.869	1.154
																																8.933	1.359		10.583	1.751		11.612	2.186		13.872	1.353
																																8.939	1.605		10.584	0.902		11.614	1.095		13.872	0.985
																																8.944	1.312		10.585	1.385		11.617	1.038		13.873	1.425
																																8.951	1.492		10.587	1.106		11.619	1.182		13.894	1.172
																																8.953	1.51		10.587	1.388		11.628	1.706		13.899	1.019
																																8.955	1.185		10.595	1.516		11.63	1.339		13.907	0.935
																																8.976	1.571		10.605	0.862		11.634	1.4		13.914	1.299
																																8.98	1.062		10.605	1.961		11.636	1.178		13.92	0.987
																																8.981	1.411		10.607	1.364		11.639	1.163		13.921	1.549
																																8.998	1.561		10.613	2.187		11.645	1.273		13.957	1.096
																																			10.623	1.364		11.655	1.261		13.965	1.369
																																7.013	1.872		10.624	1.24		11.665	1.248		13.968	0.802
																																7.027	1.114		10.625	1.575		11.668	0.874		13.969	1.65
																																7.032	0.818		10.625	1.193		11.671	0.766		13.977	1.28
																																7.033	1.632		10.628	1.406		11.674	1.156		13.978	1.049
																																7.039	1.642		10.631	1.067		11.675	0.791		13.989	1.962
																																7.046	0.979		10.642	1.33		11.677	1.116		14.012	1.422
																																7.05	1.608		10.649	1.482		11.69	1.544		14.014	0.953
																																7.063	1.233		10.653	1.417		11.69	1.733		14.018	1.217
																																7.08	1.101		10.654	1.788		11.692	1.329		14.025	0.977
																																7.084	1.044		10.658	1.625		11.698	2.1		14.031	2.212
																																7.09	1.028		10.658	1.74		11.699	1.465		14.041	2.271
																																7.101	2.544		10.667	1.295		11.702	1.247		14.043	1.488
																																7.11	1.544		10.672	1.252		11.707	1.689		14.055	1.531
																																7.112	1.606		10.682	1.287		11.721	1.241		14.057	1.002
																																7.12	1.105		10.683	1.11		11.728	1.375		14.058	0.732
																																7.144	1.606		10.692	1.449		11.732	1.704		14.058	1.201
																																7.158	1.085		10.694	1.846		11.735	1.313		14.068	0.792
																																7.177	1.534		10.7	1.485		11.736	1.625		14.068	1.391
																																7.189	1.146		10.701	1.383		11.744	1.937		14.072	1.908
																																7.192	2.351		10.703	2.701		11.748	1.279		14.088	3.912
																																7.197	2.667		10.707	1.241		11.759	1.398		14.089	1.984
																																7.198	3.316		10.709	1.625		11.762	0.928		14.092	1.239
																																7.201	1.353		10.712	1.26		11.779	1.236		14.103	1.081
																																7.209	1.604		10.716	1.34		11.792	1.252		14.114	1.403
																																7.21	1.19		10.72	1.982		11.792	1.11		14.119	1.207
																																7.211	1.332		10.73	1.378		11.802	1.173		14.138	1.333
																																7.214	2.272		10.732	1.295		11.802	0.936		14.148	1.109
																																7.22	1.222		10.739	1.796		11.81	1.624		14.148	1.267
																																7.226	0.96		10.749	1.39		11.815	1.182		14.153	2.471
																																7.24	1.394		10.749	2.245		11.817	1.08		14.165	1.304
																																7.241	0.806		10.75	1.156		11.821	1.454		14.167	2.307
																																7.247	0.86		10.751	1.26		11.826	1.092		14.174	1.379
																																7.253	1.689		10.757	1.337		11.833	1.773		14.178	1.001
																																7.26	1.609		10.764	1.244		11.834	0.922		14.188	1.152
																																7.275	1.731		10.773	1.592		11.836	0.953		14.193	1.007
																																7.288	1.706		10.794	1.098		11.84	1.225		14.198	0.705
																																7.298	1.002		10.797	1.402		11.847	1.781		14.21	1.396
																																7.299	1.041		10.811	1.279		11.848	1.307		14.218	1.012
																																7.303	3.099		10.812	1.5		11.868	0.837		14.222	1.194
																																7.312	1.331		10.814	1.396		11.868	0.795		14.225	1.752
																																7.344	1.5		10.815	0.969		11.872	1.185		14.227	1.221
																																7.356	1.161		10.818	1.211		11.873	1.481		14.229	1.151
																																7.359	2.289		10.82	2.157		11.885	2.056		14.231	0.796
																																7.36	1.544		10.822	1.538		11.887	0.97		14.234	1.273
																																7.362	1.121		10.825	1.363		11.887	1.75		14.235	1.339
																																7.362	1.967		10.827	1.753		11.893	1.314		14.235	1.504
																																7.366	1.527		10.83	1.541		11.907	1.563		14.252	1.416
																																7.387	1.173		10.832	1.382		11.908	1.79		14.256	1.516
																																7.39	0.811		10.838	1.389		11.908	2.354		14.26	0.97
																																7.411	1.546		10.843	1.675		11.908	1.35		14.261	0.684
																																7.421	1.574		10.851	1.257		11.911	1.173		14.266	1.587
																																7.443	1.018		10.854	1.604		11.912	0.781		14.273	1.085
																																7.454	1.282		10.864	1.219		11.914	1.249		14.273	1.273
																																7.461	2.841		10.867	2.207		11.916	1.176		14.275	1.344
																																7.462	1.529		10.868	0.946		11.925	2.136		14.277	1.707
																																7.474	0.962		10.87	1.246		11.927	1.468		14.279	1.685
																																7.478	1.788		10.88	0.737		11.927	1.363		14.28	1.441
																																7.481	1.183		10.881	2.095		11.928	1.183		14.285	1.099
																																7.488	1.077		10.885	1.024		11.935	1.003		14.291	1.034
																																7.498	1.558		10.891	1.193		11.936	1.59		14.308	1.001
																																7.504	1.362		10.893	1.532		11.942	1.356		14.316	1.534
																																7.507	1.854		10.897	1.228		11.956	1.384		14.317	1.394
																																7.516	1.714		10.901	1.663		11.963	1.402		14.318	0.726
																																7.521	1.751		10.903	2.708		11.978	1.193		14.334	0.616
																																7.527	1.421		10.918	2.021		11.983	1.272		14.341	2.22
																																7.537	2.111		10.924	1.561		11.985	1.346		14.352	1.262
																																7.554	2.151		10.935	1.276		11.996	1.181		14.353	2.068
																																7.562	0.701		10.942	0.867		12.011	2.043		14.392	0.615
																																7.572	1.625		10.945	1.94		12.013	1.031		14.393	1.714
																																7.582	1.105		10.957	1.224		12.022	1.033		14.399	1.335
																																7.601	1.833		10.957	2.622		12.05	1.028		14.399	1.435
																																7.601	0.983		10.959	1.738		12.056	1.227		14.401	1.2
																																7.601	0.685		10.959	1.565		12.063	0.937		14.404	1.274
																																7.617	1.606		10.969	1.287		12.065	2.512		14.417	1.486
																																7.62	1.175		10.975	1.471		12.098	0.954		14.42	1.734
																																7.652	0.892		10.993	1.383		12.103	1.294		14.422	1.084
																																7.677	1.003		10.998	0.88		12.108	1.031		14.427	1.256
																																7.678	1.181					12.124	1.249		14.428	1.546
																																7.688	3.289		9	1.154		12.127	1.548		14.433	1.541
																																7.696	1.71		9.003	1.476		12.146	1.59		14.438	1.644
																																7.697	1.33		9.003	0.839		12.151	1.222		14.455	1.184
																																7.697	1.604		9.003	1.067		12.154	1.063		14.456	1.407
																																7.722	1.21		9.015	1.609		12.156	0.716		14.464	1.131
																																7.735	2.079		9.017	1.116		12.189	1.57		14.466	1.697
																																7.76	1.781		9.024	1.052		12.201	0.549		14.468	1.144
																																7.767	2.771		9.033	1.67		12.217	1.085		14.469	1.496
																																7.767	1.203		9.054	1.439		12.228	1.454		14.47	1.021
																																7.77	1.629		9.055	1.435		12.228	1.398		14.475	1.423
																																7.787	1.762		9.057	0.808		12.234	1.375		14.478	2.492
																																7.793	0.736		9.079	1.476		12.236	1.674		14.482	1.113
																																7.801	1.34		9.08	1.22		12.241	0.758		14.484	2.338
																																7.807	1.691		9.083	1.194		12.25	0.69		14.495	1.249
																																7.809	1.166		9.091	0.946		12.253	1.014		14.507	2.481
																																7.838	0.995		9.117	1.334		12.257	1.382		14.519	1.139
																																7.845	1.974		9.122	1.337		12.258	1.24		14.534	1.381
																																7.857	1.137		9.134	0.666		12.258	1.607		14.54	1.93
																																7.869	1.062		9.139	1.164		12.277	1.292		14.558	0.919
																																7.875	1.619		9.144	1.476		12.278	1.795		14.562	2.195
																																7.877	1.727		9.145	1.114		12.285	1.506		14.566	1.354
																																7.884	1.288		9.147	1.316		12.304	1.634		14.599	1.67
																																7.884	1.212		9.148	3.205		12.317	1.558		14.635	1.316
																																7.904	1.467		9.153	2.379		12.318	1.292		14.637	1.624
																																7.91	1.184		9.154	1.061		12.324	1.979		14.641	2.602
																																7.918	1.098		9.158	1.061		12.327	2.189		14.644	1.145
																																7.928	1.223		9.172	1.327		12.331	1.433		14.646	1.225
																																7.947	1.086		9.182	1.493		12.332	1.203		14.647	0.95
																																7.954	1.124		9.194	1.616		12.34	2.176		14.658	1.539
																																7.968	1.338		9.198	1.011		12.345	1.543		14.66	1.704
																																7.971	1.805		9.199	1.273		12.354	1.474		14.662	0.765
																																7.988	1.478		9.211	2.35		12.367	1.964		14.663	1.262
																																7.997	1.354		9.214	1.112		12.369	1.549		14.671	1.276
																																8.002	1.755		9.214	1.089		12.388	1.117		14.671	0.86
																																8.007	1.425		9.227	1.764		12.388	1.052		14.688	1.08
																																8.026	1.513		9.237	1.118		12.397	1.038		14.697	2.061
																																8.026	1.522		9.257	1.456		12.4	0.919		14.704	1.155
																																8.043	0.746		9.292	1.701		12.405	1.273		14.71	1.215
																																8.056	1.073		9.299	2.726		12.408	1.38		14.712	1.607
																																8.064	1.152		9.3	0.851		12.419	1.503		14.714	1.255
																																8.069	1.849		9.302	1.299		12.437	1.643		14.726	1.435
																																8.07	1.54		9.309	1.452		12.441	1.417		14.733	2.479
																																8.082	2.476		9.339	1.495		12.444	2.379		14.733	1.484
																																8.087	1.449		9.348	1.032		12.453	0.962		14.739	2.118
																																8.104	1.889		9.35	2.332		12.454	1.383		14.774	0.918
																																8.112	1.095		9.35	0.768		12.458	1.207		14.786	0.881
																																8.142	1.3		9.355	1.11		12.465	2.298		14.788	1.112
																																8.144	1.269		9.356	2.021		12.473	1.144		14.799	1.295
																																8.151	1.351		9.361	1.335		12.48	0.896		14.814	2.182
																																8.162	2.136		9.366	1.68		12.488	1.833		14.819	1.287
																																8.165	1.212		9.379	1.32		12.504	1.463		14.824	1.26
																																8.186	1.348		9.385	1.062		12.504	1.657		14.828	1.135
																																8.199	1.472		9.388	1.306		12.505	0.966		14.833	2.262
																																8.204	1.435		9.391	2.625		12.522	1.165		14.839	1.349
																																8.21	1.673		9.394	1.027		12.523	1.355		14.843	1.706
																																8.212	1.644		9.398	1.028		12.526	0.65		14.86	1.602
																																8.227	1.074		9.408	1.111		12.53	1.176		14.865	1.026
																																8.238	1.26		9.417	1.4		12.53	1.673		14.866	0.604
																																8.242	1.348		9.422	1.016		12.531	1.161		14.891	1.073
																																8.246	1.282		9.425	1.311		12.537	2.119		14.896	1.165
																																8.248	1.402		9.428	2.98		12.544	2.664		14.902	1.124
																																8.26	1.088		9.429	1.358		12.547	1.391		14.909	1.362
																																8.277	1.568		9.435	1.296		12.549	2.599		14.909	0.739
																																8.296	1.128		9.442	1.271		12.555	1.574		14.916	1.182
																																8.305	1.444		9.446	2.539		12.557	1.603		14.926	2.429
																																8.307	1.732		9.448	1.305		12.563	2.112		14.931	1.361
																																8.311	0.82		9.455	3.03		12.565	0.827		14.933	2.986
																																8.32	1.485		9.456	0.912		12.567	1.459		14.935	0.843
																																8.326	1.42		9.457	1.442		12.571	1.065		14.937	2.403
																																8.337	1.002		9.463	1.48		12.571	0.928		14.94	1.454
																																8.339	0.693		9.474	1.142		12.574	0.814		14.946	1.69
																																8.34	1.27		9.485	1.089		12.578	1.47		14.957	1.535
																																8.362	1.674		9.487	2.002		12.581	0.863		14.962	1.302
																																8.375	1.675		9.488	1.49		12.586	1.218		14.967	1.118
																																8.395	1.205		9.499	2.106		12.587	1.696		14.973	1.155
																																8.395	0.725		9.501	1.705		12.589	1.173		14.976	2.166
																																8.4	1.213		9.507	1.249		12.591	1.273		14.978	1.16
																																8.402	1.311		9.518	1.139		12.596	1.445
																																8.403	1.553		9.542	1.708		12.615	0.985
																																8.414	1.018		9.547	1.348		12.619	1.071
																																8.419	1.155		9.551	1.304		12.619	1.113
																																8.424	2.243		9.553	1.197		12.62	1.524
																																8.432	1.035		9.561	1.037		12.621	1.271
																																8.433	0.875		9.564	1.211		12.626	1.921
																																8.439	0.932		9.564	1.77		12.63	1.195
																																8.448	1.486		9.593	2.57		12.642	1.643
																																8.459	1.57		9.6	1.43		12.645	1.314
																																8.468	0.989		9.63	1.902		12.648	1.769
																																8.47	1.457		9.651	0.813		12.651	1.502
																																8.475	1.346		9.664	0.813		12.652	1.839
																																8.489	1.374		9.666	1.099		12.652	1.66
																																8.491	2.433		9.678	1.176		12.664	1.48
																																8.494	1.377		9.68	1.251		12.671	0.777
																																8.499	1.9		9.69	1.437		12.678	1.481
																																8.5	1.473		9.694	1.186		12.68	1.51
																																8.509	1.4		9.699	1.086		12.703	1.112
																																8.514	1.277		9.706	1.242		12.713	0.966
																																8.524	1.285		9.707	1.505		12.715	1.742
																																8.528	1.205		9.708	1.971		12.717	1.543
																																8.529	1.371		9.711	0.798		12.719	1.123
																																8.543	1.349		9.742	2.637		12.752	1.457
																																8.552	1.248		9.742	0.865		12.753	1.461
																																8.552	1.613		9.759	1.163		12.762	1.521
																																8.57	1.12		9.761	0.989		12.763	1.459
																																8.572	1.441		9.762	2.825		12.765	1.4
																																8.574	1.681		9.762	1.73		12.766	0.842
																																8.577	1.606		9.767	1.152		12.787	0.732
																																8.582	0.976		9.77	1.333		12.799	1.447
																																8.589	1.217		9.771	1.077		12.805	1.689
																																8.593	1.605		9.772	1.681		12.82	1.294
																																8.596	1.084		9.778	1.934		12.821	0.558
																																8.603	1.094		9.779	1.169		12.822	1.875
																																8.603	1.501		9.782	1.254		12.824	1.114
																																8.612	1.6		9.785	1.876		12.839	1.041
																																8.614	1.251		9.79	2.025		12.844	1.525
																																8.618	1.447		9.796	1.074		12.847	1.267
																																8.632	1.285		9.797	1.249		12.871	1.276
																																8.636	2.156		9.798	1.057		12.876	1.338
																																8.644	1.913		9.802	1.852		12.885	1.558
																																8.649	1.996		9.804	1.212		12.889	1.144
																																8.651	2.216		9.81	1.606		12.89	0.838
																																8.651	1.457		9.831	1.266		12.915	1.457
																																8.66	1.029		9.839	2.007		12.918	1.176
																																8.662	1.062		9.839	1.852		12.92	1.224
																																8.663	2.643		9.844	1.6		12.926	1.352
																																8.667	0.895		9.849	1.153		12.947	1.304
																																8.67	1.345		9.856	1.269		12.958	1.469
																																8.673	1.877		9.86	0.868		12.964	2.382
																																8.703	0.733		9.865	1.787		12.984	1.026
																																8.706	0.89		9.872	1.402		12.985	1.345
																																8.719	0.943		9.882	2.526		12.991	1.244
																																8.732	1.498		9.889	1.737
																																8.734	1.187		9.889	1.426
																																8.735	1.728		9.89	1.876
																																8.75	1.672		9.893	1.668
																																8.753	1.492		9.897	1.991
																																8.762	1.18		9.904	1.866
																																8.768	1.314		9.908	0.801
																																8.771	1.188		9.921	2.575
																																8.781	1.236		9.922	1.562
																																8.796	1.24		9.927	1.288
																																8.802	1.102		9.928	0.974
																																8.821	0.675		9.929	1.119
																																8.826	1.565		9.937	1.261
																																8.827	1.466		9.947	1.26
																																8.83	1.229		9.948	1.597
																																8.84	1.357		9.957	1.146
																																8.846	1.469		9.963	1.225
																																8.851	1.275		9.965	2.507
																																8.856	2.115		9.969	1.018
																																8.866	0.823		9.974	2.913
																																8.881	1.296		9.98	1.297
																																8.905	0.751		9.981	1.672
																																8.911	1.055		9.983	1.465
																																8.912	0.959		9.993	1.222
																																8.913	0.969		9.997	1.765
																																8.927	0.934		10.006	1.294
																																8.937	1.355		10.012	1.458
																																8.938	1.554		10.016	1.455
																																8.945	1.048		10.019	1.163
																																8.945	0.875		10.023	1.021
																																8.956	1.471		10.03	1.192
																																8.957	1.06		10.034	1.353
																																8.974	1.071		10.058	1.421
																																8.975	1.504		10.063	2.705
																																8.983	1.219		10.074	0.945
																																8.984	1.32		10.077	1.283
																																8.998	0.958		10.084	1.7
																																			10.094	1.271
																																			10.1	1.493
																																			10.103	1.731
																																			10.106	2.225
																																			10.11	1.239
																																			10.116	0.998
																																			10.117	1.172
																																			10.117	0.858
																																			10.133	0.761
																																			10.152	1.23
																																			10.154	1.284
																																			10.154	1.023
																																			10.159	1.52
																																			10.182	0.953
																																			10.195	1.315
																																			10.195	1.48
																																			10.206	1.286
																																			10.222	1.191
																																			10.223	1.223
																																			10.227	1.546
																																			10.246	1.481
																																			10.28	1.506
																																			10.292	1.133
																																			10.294	1.615
																																			10.296	1.761
																																			10.313	1.427
																																			10.313	1.827
																																			10.315	1.232
																																			10.323	1.152
																																			10.324	0.938
																																			10.35	1.108
																																			10.357	1.462
																																			10.358	2.737
																																			10.36	2.287
																																			10.364	1.133
																																			10.381	1.474
																																			10.382	1.422
																																			10.392	1.397
																																			10.394	2.458
																																			10.404	1.505
																																			10.406	0.953
																																			10.429	0.908
																																			10.431	1.756
																																			10.438	1.204
																																			10.447	0.785
																																			10.471	1.202
																																			10.501	1.602
																																			10.502	1.653
																																			10.506	1.054
																																			10.522	2.947
																																			10.532	2.402
																																			10.536	1.811
																																			10.542	1.021
																																			10.544	0.987
																																			10.549	1.371
																																			10.567	2.157
																																			10.568	1.556
																																			10.576	1.099
																																			10.589	1.852
																																			10.596	1.501
																																			10.61	1.334
																																			10.615	1.289
																																			10.616	1.883
																																			10.631	1.538
																																			10.634	1.786
																																			10.64	0.952
																																			10.644	1.617
																																			10.649	1.345
																																			10.657	1.131
																																			10.671	1.772
																																			10.68	1.197
																																			10.684	1.883
																																			10.689	1.038
																																			10.699	1.43
																																			10.712	2.709
																																			10.728	1.003
																																			10.729	0.971
																																			10.73	1.525
																																			10.731	1.193
																																			10.742	1.723
																																			10.743	1.288
																																			10.746	1.631
																																			10.748	1.806
																																			10.748	1.587
																																			10.759	1.141
																																			10.783	1.505
																																			10.789	1.361
																																			10.79	1.367
																																			10.795	1.006
																																			10.796	1.025
																																			10.796	1.157
																																			10.798	1.869
																																			10.801	1.139
																																			10.817	1.118
																																			10.818	1.138
																																			10.82	1.348
																																			10.827	1.645
																																			10.828	1.574
																																			10.841	1.145
																																			10.842	1.461
																																			10.857	2.008
																																			10.869	1.557
																																			10.871	1.522
																																			10.896	1.539
																																			10.918	1.265
																																			10.93	1.147
																																			10.931	1.223
																																			10.936	1.371
																																			10.937	1.298
																																			10.939	2.55
																																			10.947	1.042
																																			10.948	1.016
																																			10.957	0.97
																																			10.958	1.626
																																			10.961	1.625
																																			10.97	1.553
																																			10.981	1.679
																																			10.983	1.061
[truncated: 72 more columns]

## Sheet: Figure 8D
Figure 8D
(Intensity)
		MAP7 intensity
		Old MT segment	New MT segment
		9423.85	2412.55
		10200.9	2140.59
		7196.07	1532.2
		6332.52	1228.15
		9593.43	2223.18
		9434.28	2956.25
		10365.3	1858.46
		5888.61	1816.32
		6141.96	1802.6
		4950.9	1168.84
		6179.4	2055.18
		9158.53	1702.06
		6485.27	1230.16
		5287.52	1395.52
		11406.4	1683.92
		10900.1	1293.68
		7382.4	1624.66
		7790.2	1665.63
		3343.14	313.07
		4011.86	143.04
		3538.14	266.93
		3169.88	1057.19
		2687.74	1649.9
		2995.42	1029.43
		3288.93	1586.21
		9164.9	1196.9
		5571	1158.7
		2926.58	2120.5
		3099	2491.1
		7239.19	2815
		5809.13	454.76
		2700.89	179.47
		2529.31	128.04
		1624.84	1928.1
		2600.2	948.1
		1439.4	1689
		2915.86	604.2
		1866.87	2105.6
		3828.15	1964
		3097.37	617.8
		3069.71	2252.27
		5247.84	1091.08
		3390.85	1832
		4759.69	742.59
		3470.28	1331.48
		3788.86	654.47
		4546.21	817.81
		4256.8
		1827.62
		1138.09
		2201.07
		2175.2
		1550.33
		1797.54
		3153.11
		6110.79
		2879.18
		1402.07
		4789.54
		3349.73
		9304.2
		5080.3
		5673.6
		9834.9
		7173.6
		5848.4
		9299.2
		600.59
		768.52
		684.43
		767.72
		830.37
		652.09
		2626
		4394.6
		1585
		3406.1
		6216.8
		3464.2
		3732.7
		2918.1
		8917.2
		3289.7
		4028.84
		5014.96
		3796.53
		2432.3
		2785.33
		3567.19
		4325.94
		4079.3
		5169.58
		2934.03
		4436.48
		6023.17
		3091.12
		7230.14
		4389.06
		5287.65
		3823.18
		2951.26
		3318.57
		5048.29
		1157.3
		2559.64
		2554.65
		1265.59
		1627.06
		1477.08

## Sheet: Figure 8F
Figure 8F
(Intensity)
		KIF5B-560 intensity
		Old MT segment	New MT segment
		1824.76	1741.87
		1694.96	970.391
		1851.89	753.35
		2359.87	609.94
		1211.64	691.32
		2614.59	2204.17
		639.138	2398.81
		1820.96	1335.84
		1455.84	1632.52
		1117.18	374.17
		2447.4	537.86
		2755.77	455.619
		1824.04	1614.35
		4186.5	1531.23
		4393.77	845.966
		3295.59	623.069
		4047.83	688.143
		6585.61	542.679
		6943.96	1190.33
		7131.22	945.885
		4190.44	474.091
		14691.8	1219.44
		20580.8	996.385
		21499.3	246.607
		15089	2075.28
		4936.32	542.458
		4100.07	269.24
		2460.59	228.25
		1939.15	247.586
		2985.39	464.88
		4030.33	429.792
		2839.15	472.174
		3059.76	141.71
		2563.82	411.846
		3285.63	121.276
		3888.44	271.233
		4261.77	1601.31
		5968.18	428.81
		4170.44	637.5
		6131.04	650.759
		6432.09	208.05
		2085.45	2123.42
		4706.08	2336.48
		12936.4	878.379
		9615	859.909
		19736.4	2094.13
		2349.52	5582.27
		3899.17	757.542
		3135.94	3490.14
		3287.52	2334.65
		2272.96	3071.12
		4007.83	6043.58
		2511	820.667
		6313.59	540.12
		8537.45	2695.5
		6584.3	224
		2299.21	1431.24
		3297.74	2443.58
		3723.07	2528
		2604.68	121.846
		3157	1496.38
		6957.92	398.48
		8224.19	188.613
		3135.3	82.9259
		4903.74	342.387
		2450.88	1734.28
		5108.95	1572.64
		1609.48	3687.65
		2527.46	975.56
		3753.68	1640.36
		526.933	1123.07
		4461.06
		2441.47
		5667.84
		1218.5
		6657.08
		3643.49
		5298.69
		11706.5
		4909.59
		6066.72
		6198.28
		8711.33
		4035.29
		3442.37
		4409.44
		1265.07
		4046
		4817.53
		6565.85
		3804.5
		6190.97
		1075
		620.067
		1499.73
		642.08
		989.625
		896.136
		732.818
		1725.86
		1608.22
		2849.79
		1755.83
		2108.5
		2684.6
		1928.23
		3291
		4877.58
		3366.96
		5329.73
		2499.72
		4179.35
		2797.89
		3142.71
		3598.48
		4718.52
		6401.14
		6492.03
		2189.31
		3166.13
		8394.68
		6303.19
		6551.27
		5801.04
		5603.77
		4719.88
		10429
		6439.48
		5362.71
		7202.22
		6056.76
		10855.4
		10511.5
		7078.19
		5858.08
		7739.04
		5492.14
		6134.52
		5813.39
		14383.8
		3923.97
		3583.11
		4436
		2515.04
		3087.11
		1627.85
		1440.47
		3421.64
		6858.64
		7030.5
		7070.94
		4364.42
		5549.5
		3668.11
		2010

## Sheet: Figure 8H
Figure 8H
(Intensity)
		KIF13B-380-LZ intensity
		Old MT segment	New MT segment
		1657.71	2500.1
		1926.83	2606.12
		206.509	218.326
		202.396	863.032
		1432.54	3076.4
		1239.13	1198.36
		1149.26	1575.78
		1.89	955.35
		1317.59	3791.72
		3739.11	2028.59
		1364.03	2032.52
		1117.17	2105.36
		-156.467	128.433
		2084.4	7667.63
		701.267	1452.87
		-91.4333	164.633
		105.31	1436
		1818.73	2391.03
		209.167	675.3
		3057.85	8040.75
		5.4111	1012.74
		3693.11	3694.92
		614.45	1858.28
		2461.18	3888.9

## Sheet: Figure 8J
Figure 8J
(%)
		Control	KIF13B-KO mixed
		36.61	5.9
		17.19	28.83
		46.22	16.27
		11.4	20.61
		26.69	2.08
		25.67	8.94
		24.61	11.2
		20.2	9.43
		5.49	9.29
		9	6.73
		14.15	11.87
		33.33	0.13
		42.38	20.92
		18.74	18.47
		23.02	21.71
		17.08	1.7
		30.62	7.25
		31.35	13.56
		29.14	37.13
		49.4	41.8
		21.91	18.19
		35.08	5.53
		21.62	13.09
		18.05	3.81
			8.14
			27.78
			18.39
			7.77
			5.9
			16.91
